# Supplementary material for: Regeneration alters open chromatin andcis-regulatory landscape of erythroid precursors
Source: HighWire-hosted journal article supplement (doi:10.1101/gr.279949.124), 2025-06-02
Supplement: Supplemental_File_.pdf [file Supplemental_File_.pdf]

1  
2  
3  
4  
5  
6  
7  
8  
9  
10  
11  
12  
13  
14  
15  
16  
17  
18  
19

**Supplemental Materials**

**Regeneration Alters Open Chromatin and *Cis*-Regulatory  
Landscape of Erythroid Precursors  
(Zhou et al.)**

- File Contains:**
- Supplemental Methods
  - Supplemental Figures and Figure Legends
  - Supplemental References

## **Supplemental Methods**

### **ATAC-seq Data Analysis**

To analyze acute and long-lasting peaks, we used MEME-ChIP. Differential ATAC-seq peaks were called using Manorm (1,2). Acute peaks were defined as differential between Day 0 and Day 7 but resolved by Day 35. Long-lasting peaks were peaks that were differential between Day 0 and Day 7 and remained changed by Day 35. To compare PHZ-induced changes with ATAC-seq changes that occur during haematopoiesis we downloaded the publicly available data at the GEO accession GSE59992. The fastq files were downloaded and remapped to mm10 using bowtie2 (3). Samtools was used to quality filter (q=10) and sort reads (4). PCR duplicates were removed with picard MarkDuplicates (5). Finally biological replicates were merged, and bigwig files were generated using deeptools bamCoverage –normalizeUsing BPM (6). Log2 fold changes in signal between CMP and MEP as well as between MEP and ErA were then calculated for loci corresponding to all differential peaks found in PHZ timepoints. Pearson correlation was then used to compare these changes to that of day 7 vs day 0 PHZ for these loci.

A

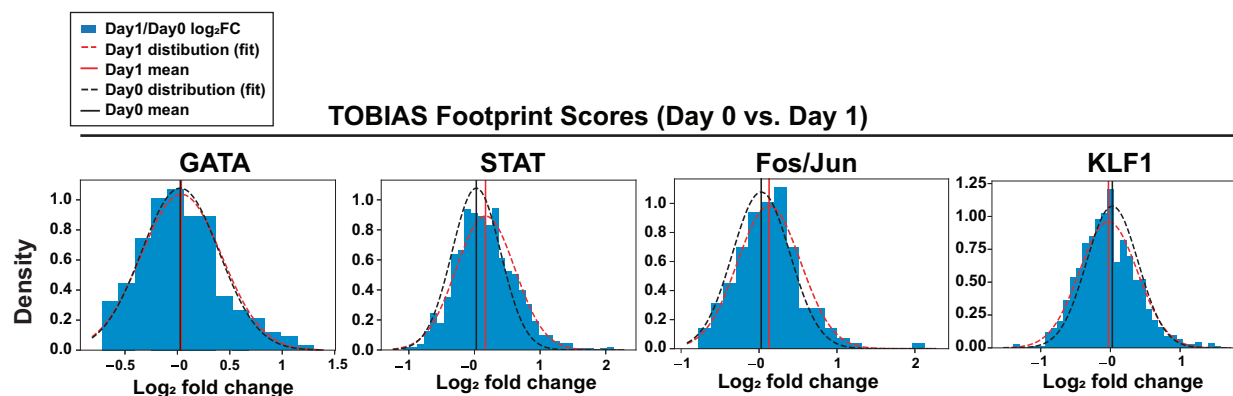

B

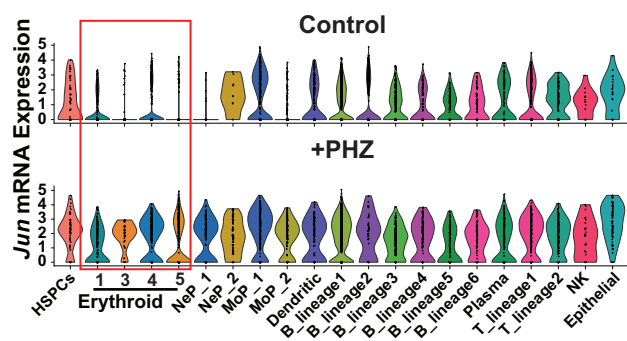

C

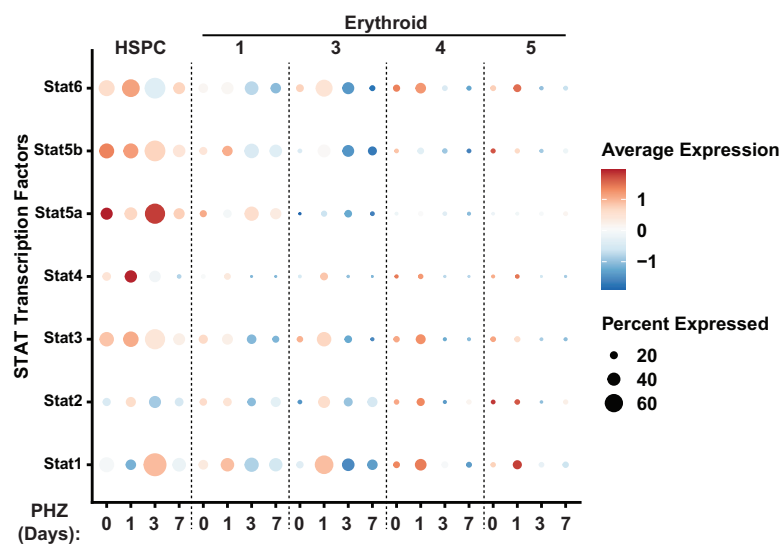

D

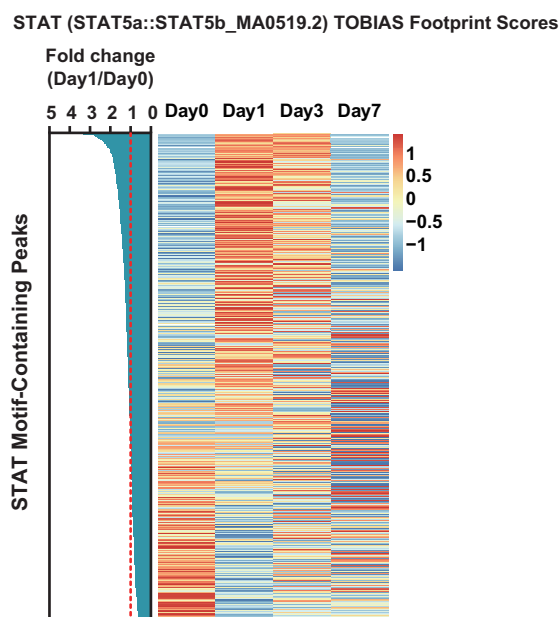

E

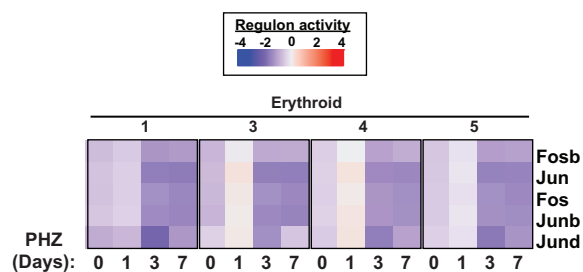

## SUPPLEMENTAL FIGURE LEGENDS

### **Supplemental Figure 1. Early onset changes to chromatin post-anemia in erythroid cells are associated with increased AP-1 footprint, gene expression, and activity scores. A)**

Density plots represent a HOMER motif analysis at regions where ATAC-seq peaks were gained 24 hours post-PHZ. TF motifs corresponding to ATAC footprinting (TOBIAS) analysis: GATA1 (MA0035.5), Stat5a/Stat5b (MA0519.2), Fos/Jun (MA1126.2), and KLF1 (MA0493.3). B) Jun mRNA expression plots from single cell RNA-seq progenitor data (all Kit<sup>+</sup> cells) annotated as HSPCs, erythroid clusters, neutrophils (NeP), monocytes (MoP), Dendritic, B cells, T cells, Natural Killer (NK) plasma and epithelial cells. Units of expression are relative log normalized. Error bars represent SD. \*\*\*p<0.001 (Wilcoxon signed rank test). C) Dot plot depicting single cell RNA-seq analysis of HSPC and erythroid-specific expression of all detectable components of the AP-1 transcription factor family at 0, 1, 3, and 7 days post-PHZ. D) Heat map of genomic regions containing Stat5a/5b motifs (MA0519.2) with changes to TOBIAS footprint scores between 0- and 1-day post-PHZ, ranked by fold change. E) SCENIC analysis comparing the regulon activity of AP-1 components in erythroid cells at 0, 1, 3, and 7 days post-PHZ.

**A**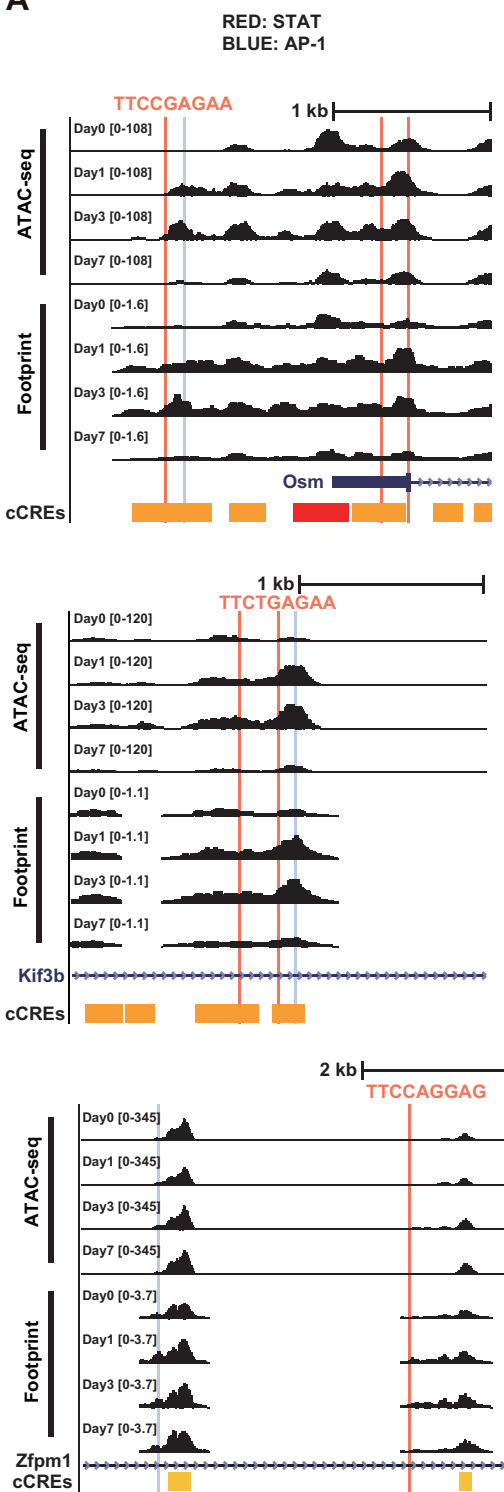**B**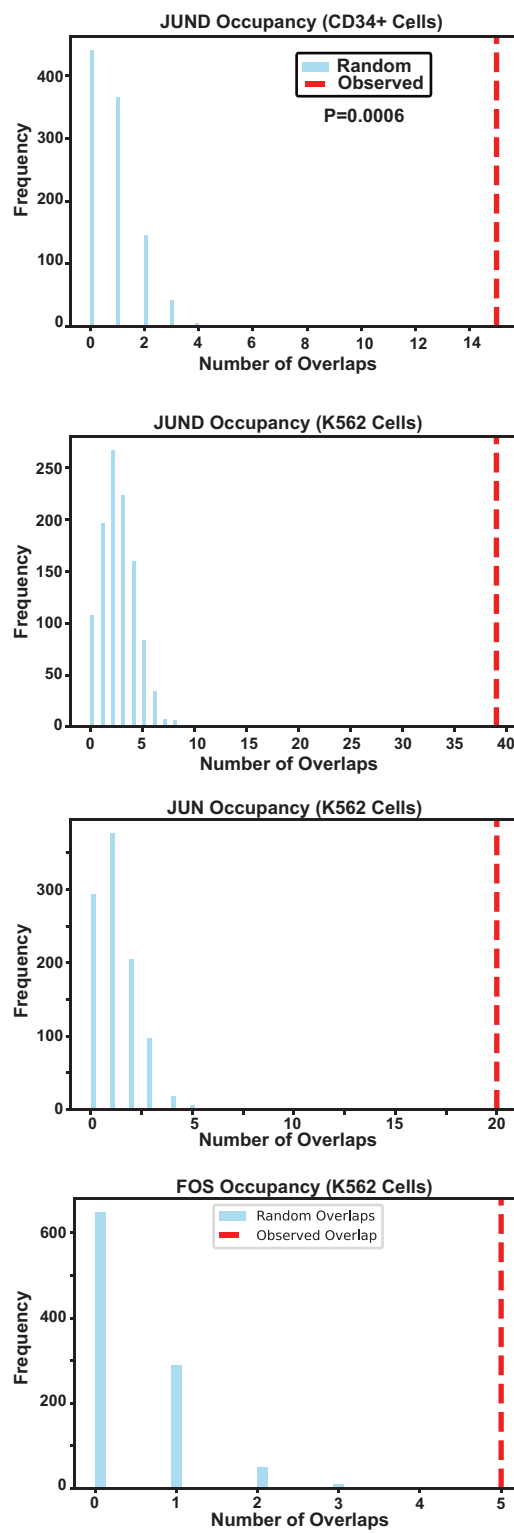

**Supplemental Figure 2. Anemia recovery alters ATAC footprints at sites associated with signal-responsive AP-1 and STAT sites and known AP-1 occupancy sites.** (A) ATAC-seq and TOBIAS Footprint scores at the *Osm*, *Kif3b*, and *Zfpm1* loci. Blue line demarcates region with changing AP-1 footprint score. Red line demarcates region with changing STAT footprint score. cCREs were classified by ENCODE. Red=promoter, orange=proximal enhancer-like signature. (B) Plots depict the overlap in ChIP-seq observed (dotted red line) and random (blue lines) occupancy of JUND (CD34+), JUND (K562), JUN (K562), and FOS (K562) at 178 sites with AP-1 footprints changing at day 1 post-PHZ. Blue lines were calculated by randomly assigning 178 ATAC-seq peaks and comparing against ChIP-seq data.

**A**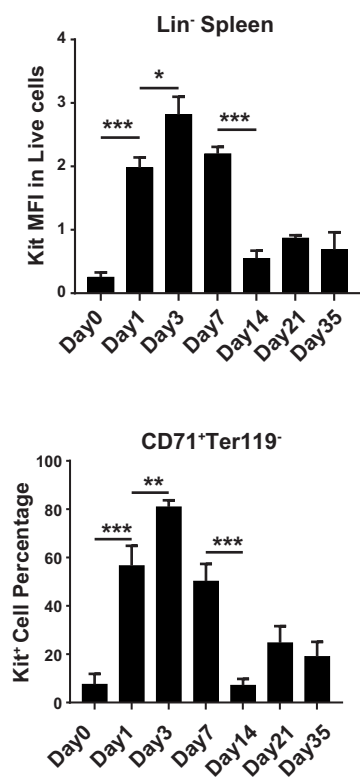**B**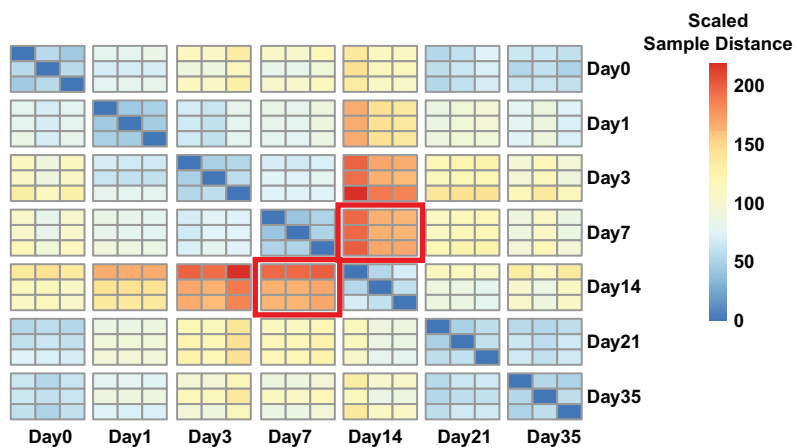

**Supplemental Figure 3. Changes in the frequency of Kit<sup>+</sup> and erythroid precursors at time points post-PHZ and chromatin occupancy.** A) (top) Flow cytometry analysis of the Kit median fluorescence intensity (MFI) in live (DAPI-negative) Lineage-negative spleen cells. (bottom) Flow cytometry analysis of the percentage of Kit-positive cells in live (DAPI-negative) Lineage-negative CD71-positive, Ter119-negative spleen cells. B) Scaled sample distance depicting ATAC-seq comparisons of individual replicates between each time point post-PHZ (days 0, 1, 3, 7, 14, 21, and 35 (N=3)). Statistical significance was determined by two-tailed unpaired Student's t test. \*p<0.05, \*\*p<0.01, \*\*\*p<0.001.



A

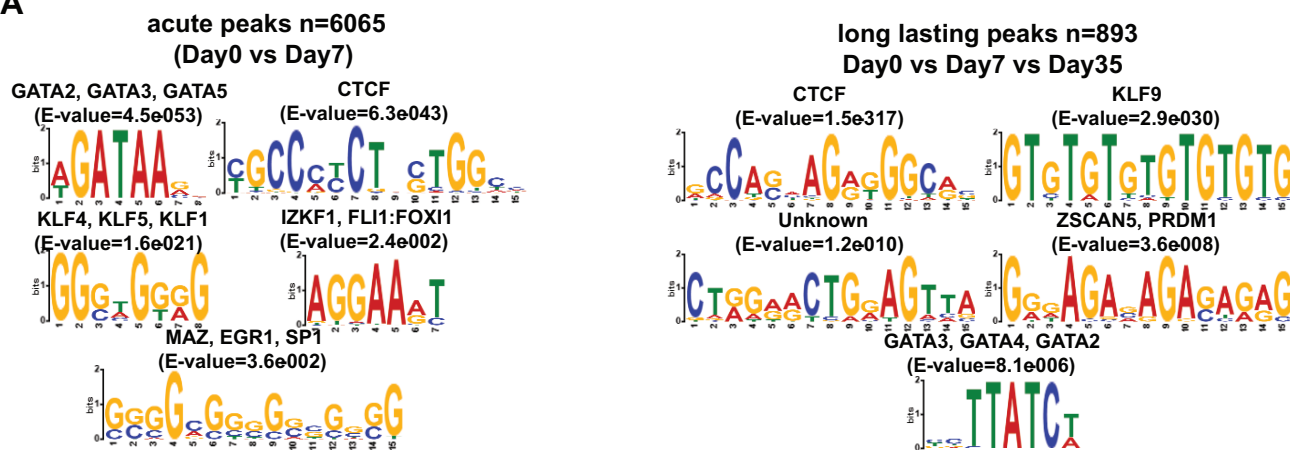

B

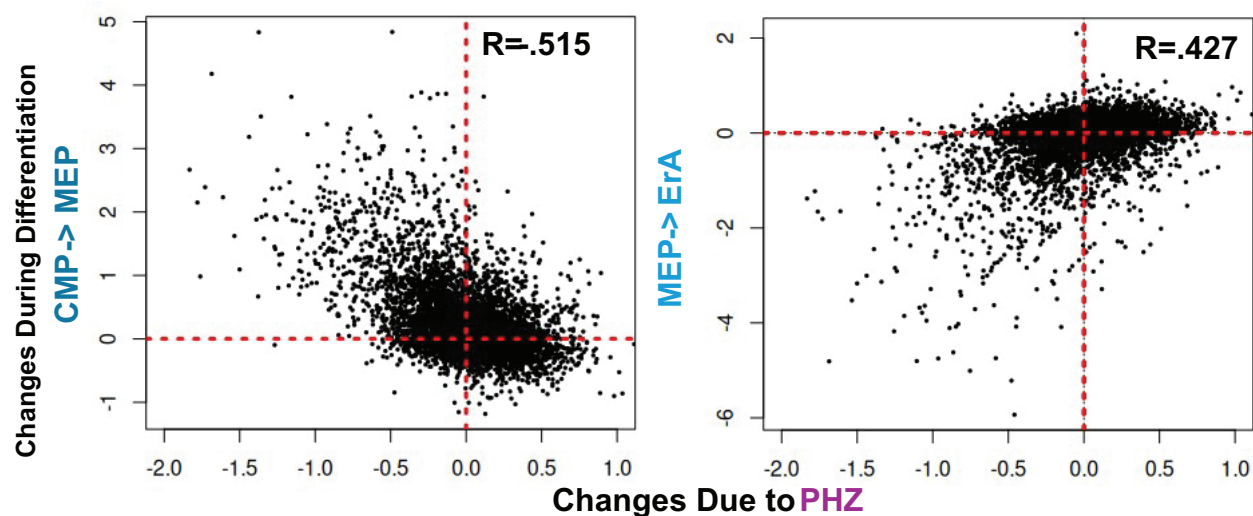

**Supplemental Figure 4. Assigning temporal and durable chromatin changes in acute anemia to discrete functional cell types.** A) Motif analysis (MEME-ChIP) at regions where ATAC-seq peaks were transiently gained or lost at 7 days post-PHZ, followed by restoration of the original state, and at regions where ATAC-peaks remained durably elevated at 35 days post-PHZ. B) Comparisons of PHZ-induced chromatin changes to chromatin changes which occur during transitions between common myeloid progenitor (CMP), megakaryocyte-erythrocyte progenitor (MEP), and committed erythroid precursors (EryA).

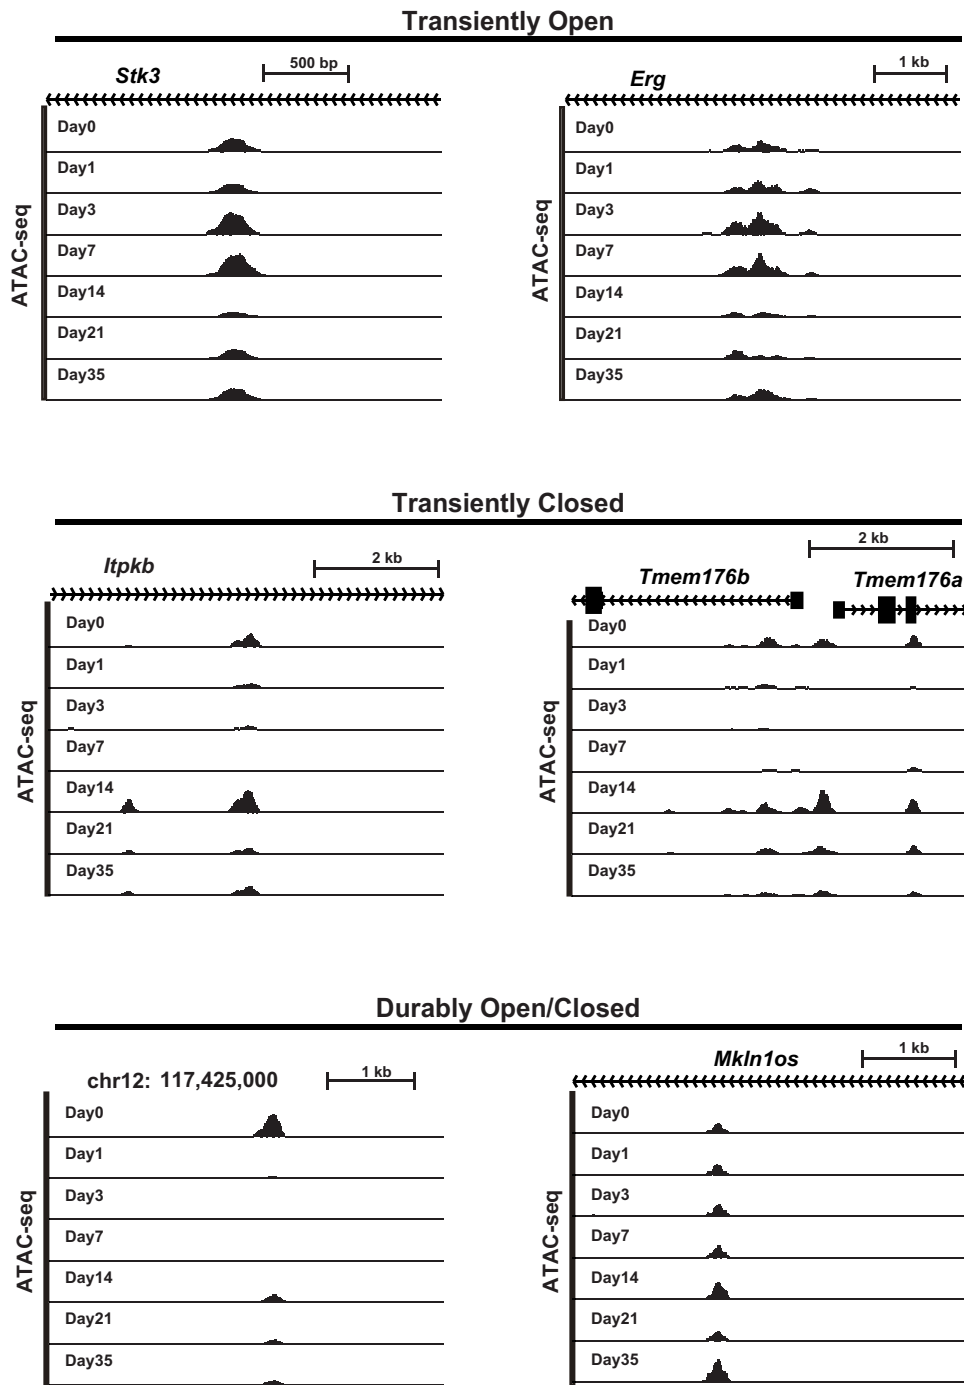

**Supplemental Figure 5. Transient and durable changes to chromatin accessibility over a 35-day anemia-recovery time course.** UCSC genome browser tracks depict examples of ATAC-seq data from transiently open, transiently-closed and durably changed chromatin accessible regions.

**A**

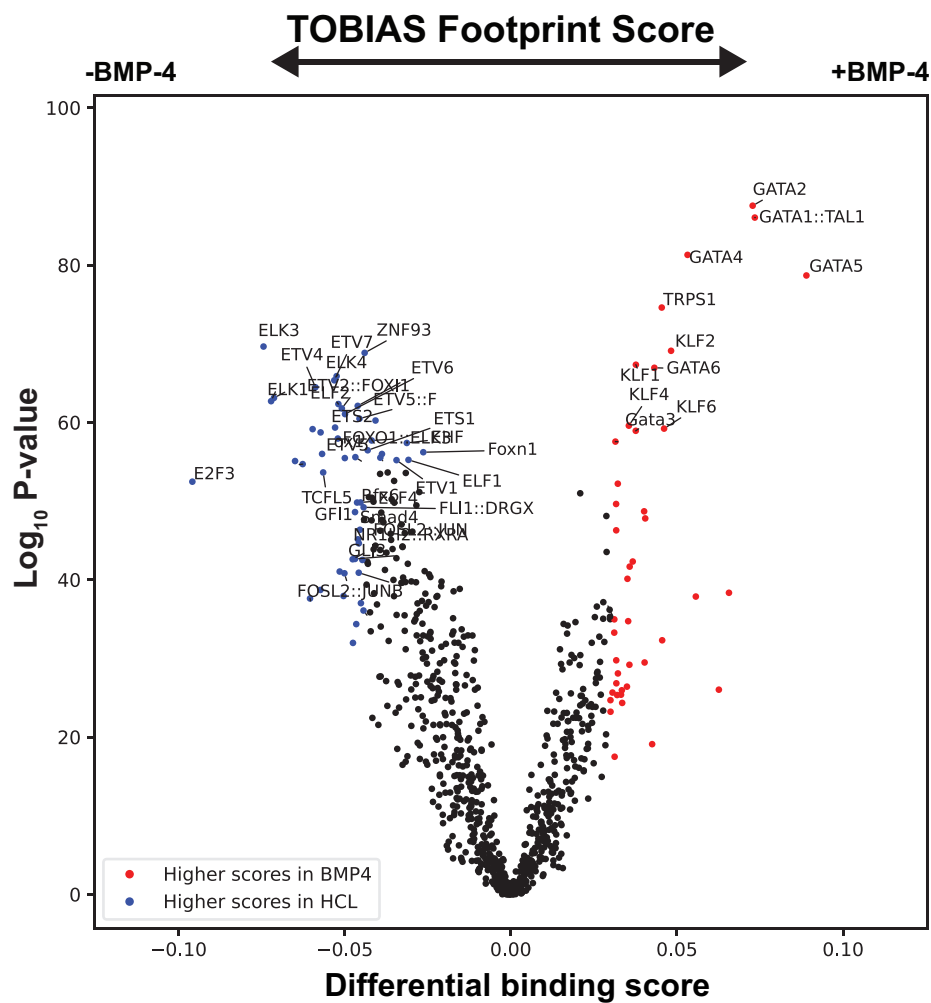

**B**

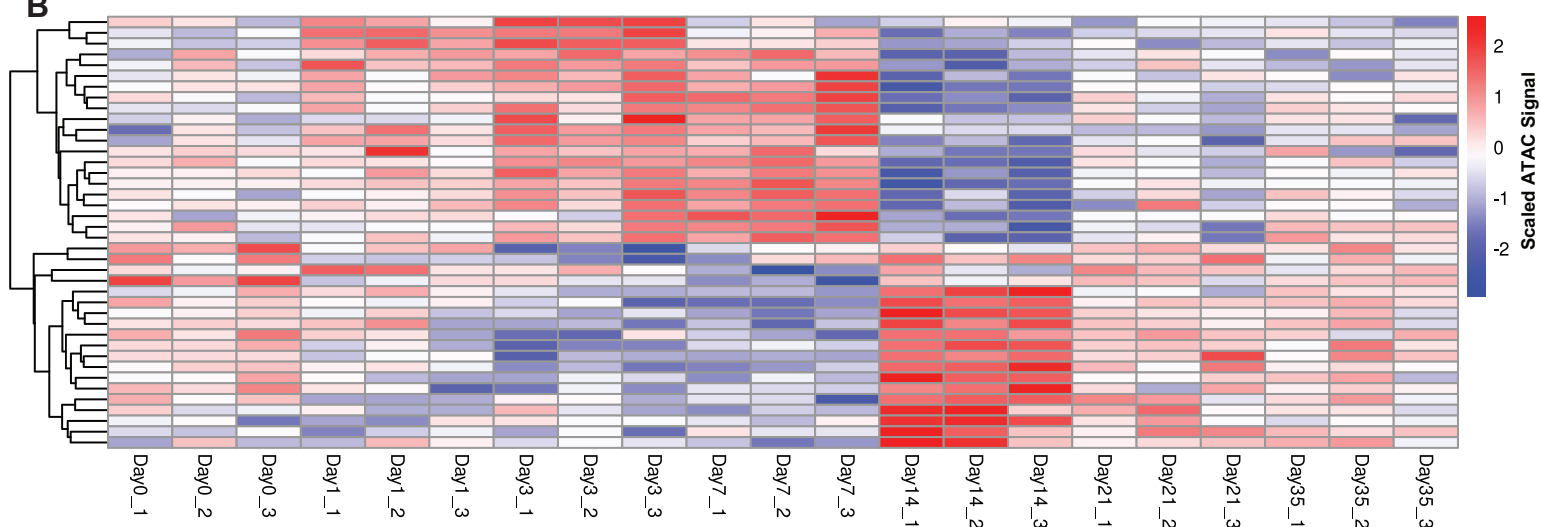

**Supplemental Figure 6. BMP-4 induces chromatin accessibility changes at select sites genome wide.** A) Volcano plot of transcription factor motif differential binding scores in control vs. BMP-4-stimulated human primary erythroid cultures on the x-axis (calculated using TOBIAS) and  $-\log_{10}$  (p value) on the y-axis. Each dot represents one transcription factor assigned by consensus motif. B) Heat map depicts the ATAC signal (scaled based on each regions max signal) of 39 chromatin sites which are BMP4-sensitive and either activated or repressed in acute anemia induced by PHZ.

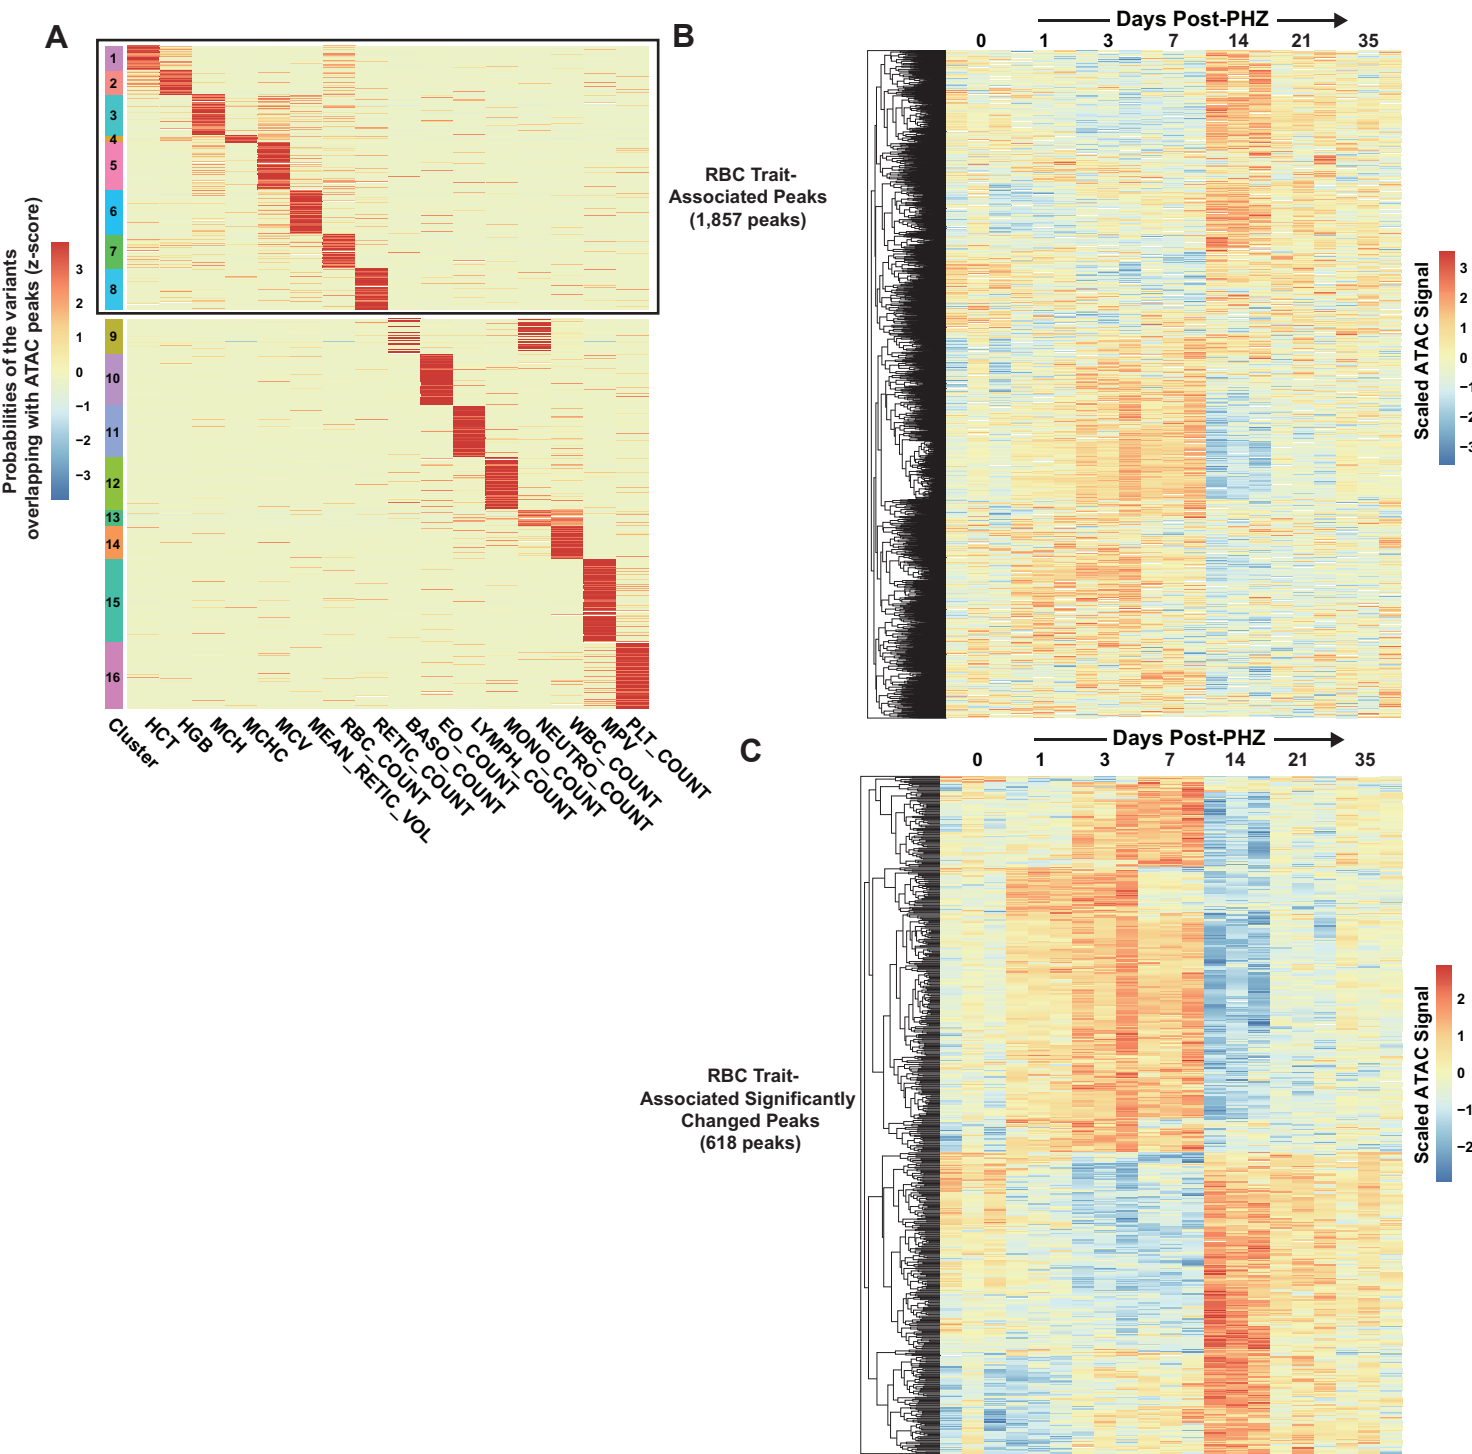

**Supplemental Figure 7. Evaluating SNPs linked to hematologic traits at anemia-sensitive cis-elements.** A) After human (hg38) to mouse (mm10) lift-over, heat map depicts the probability that individual SNP variants overlap with peaks in the mouse genome. B) Heat map of scaled ATAC-seq signal at each of the trait-associated SNPs. C) Heat map of scaled ATAC-seq signal at SNPs associated with red blood cell traits.



## SUPPLEMENTAL REFERENCES

1. Bailey, T.L., Johnson, J., Grant, C.E. and Noble, W.S. (2015) The MEME Suite. *Nucleic Acids Res*, **43**, W39-49.
2. Shao, Z., Zhang, Y., Yuan, G.C., Orkin, S.H. and Waxman, D.J. (2012) MAnorm: a robust model for quantitative comparison of ChIP-Seq data sets. *Genome Biol*, **13**, R16.
3. Langmead, B. and Salzberg, S.L. (2012) Fast gapped-read alignment with Bowtie 2. *Nat Methods*, **9**, 357-359.
4. Danecek, P., Bonfield, J.K., Liddle, J., Marshall, J., Ohan, V., Pollard, M.O., Whitwham, A., Keane, T., McCarthy, S.A., Davies, R.M. *et al.* (2021) Twelve years of SAMtools and BCFtools. *Gigascience*, **10**.
5. @misc{Picard2019toolkit, title = {Picard toolkit}, year = {2019}, publisher = {Broad Institute}, journal = {Broad Institute, G.r., {\url{<https://broadinstitute.github.io/picard/>}}}, h. and }.
6. Ramirez, F., Dundar, F., Diehl, S., Gruning, B.A. and Manke, T. (2014) deepTools: a flexible platform for exploring deep-sequencing data. *Nucleic Acids Res*, **42**, W187-191.
