# Supplementary material for: Regeneration alters open chromatin andcis-regulatory landscape of erythroid precursors
Source: HighWire-hosted journal article supplement (doi:10.1101/gr.279949.124), 2025-06-02
Supplement: Supplemental_Table__S1.xlsx [file Supplemental_Table__S1.xlsx]

## Sheet: README
This datasheet shows the list of significantly upregulated genes in Erythroid3 cluster at PHZ_D1 vs. Control. Fold change (PHZ_D1/Control) >=1.5, p_adj<=0.05.
Differential expression was calculating using Findmarkers function in Seurat v3.2 package. Method selcted for Findmarkers: wilcox.
Meaning of each column title
avg_logFC	log(e) fold-chage of the average expression between the two groups. Positive values indicate that the gene is more highly expressed in the Anemia group
Fold_change	Transferred log fold change to non-log value
pct.1	The percentage of cells where the gene is detected in the Anemia group
pct.2	The percentage of cells where the gene is detected in the Control group
p_val_adj	Adjusted p-value, based on bonferroni correction using all genes in the dataset
TFS	Whether the gene is belong to transcription factors
AP-1 family genes are hilighted by yellow color
Data is sorted in descending order based on Fold_change

## Sheet: Sheet2
	avg_logFC	Fold_change	pct.1	pct.2	p_val_adj	TFs
Igkv8-30	2.82657	16.8875	0.806	0.035	2.51e-09
Jchain	2.71987	15.1783	0.871	0.193	3.27e-07
Igkv12-89	2.50607	12.2566	0.548	0	2.57e-05
Ighv6-6	2.01728	7.51785	0.613	0	1.56e-06
S100a9	1.84446	6.32465	0.839	0.053	1.15e-08
Il1b	1.81864	6.16344	0.742	0	3.98e-09
S100a8	1.78855	5.98075	0.774	0.053	8.67e-08
Lyz2	1.61057	5.00568	0.645	0.018	1.43e-06
Igkj2	1.55873	4.75277	0.645	0.053	7.24e-05
Ighv1-55	1.51913	4.56825	0.484	0	0.000377291
Tbc1d4	1.51438	4.54662	0.645	0.018	4.24e-06
Chil3	1.50572	4.50739	0.581	0	6.44e-06
Iglv1	1.38906	4.01107	0.806	0.035	1.58e-08
Hsp90b1	1.33069	3.78365	0.968	0.368	7.85e-05
Ighj4	1.29874	3.66468	0.613	0.035	7.64e-05
Ctsd	1.27945	3.59466	0.935	0.123	7.84e-09
Tmed9	1.21251	3.36191	0.677	0.053	1.27e-05
Tcf7	1.2076	3.34544	0.613	0.018	1.58e-05	yes
S100a4	1.19552	3.30527	0.645	0.035	5.11e-05
Efhd2	1.19152	3.29209	0.774	0.035	4.96e-08
Ly6c2	1.18136	3.25879	0.645	0.018	1.32e-06
Hspa1a	1.17171	3.2275	0.968	0.158	8.05e-07
Txndc5	1.16748	3.21388	0.677	0.088	0.000505141
Klf6	1.15387	3.17043	0.839	0.123	9.05e-06	yes
Prdx1	1.12917	3.09309	0.871	0.193	4.36e-05
Cytip	1.10823	3.02898	0.871	0.123	4.27e-06
Hspa1b	1.09811	2.9985	0.839	0.088	2.99e-06
Hdlbp	1.08215	2.95101	0.742	0.14	0.000360375
C1qtnf12	1.07817	2.93929	0.742	0.07	4.83e-06
Eid1	1.03116	2.80431	0.581	0.053	0.000657922
Junb	1.0186	2.76931	0.903	0.193	0.0002669	yes
Ppp1r9b	1.00862	2.74181	0.71	0.088	7.76e-05
Gadd45b	0.995339	2.70564	0.71	0.088	0.000191756
Ddost	0.991519	2.69533	0.71	0.088	6.8e-05
Dynll2	0.987222	2.68377	0.548	0.053	0.00211617
Ndufb10	0.981764	2.66916	0.742	0.053	1.83e-06
Gspt1	0.973765	2.6479	0.645	0.123	0.00767019
Mpeg1	0.96526	2.62547	0.645	0.053	0.000176243
Aebp2	0.963875	2.62184	0.613	0.07	0.000665247	yes
Trbc2	0.942099	2.56536	0.806	0.105	8.28e-05
Mns1	0.927535	2.52827	0.516	0.053	0.0237051
Eif4g1	0.925464	2.52304	0.871	0.228	0.00998422
Odf2	0.924111	2.51963	0.484	0.035	0.00701892
Cd63	0.893201	2.44294	0.452	0	0.00138651
Rtraf	0.891741	2.43937	0.548	0.053	0.00639802
Pcbp1	0.889238	2.43328	0.871	0.158	6.14e-05
Mrpl3	0.882028	2.4158	0.484	0.018	0.00198583
Tgfbi	0.880715	2.41262	0.452	0	0.00138651
Gtf2h1	0.879071	2.40866	0.484	0.035	0.00803669
Casp3	0.875394	2.39982	0.645	0.053	0.000188569
Psmb4	0.858634	2.35993	0.806	0.158	0.00014267
S100a6	0.853522	2.3479	0.581	0.035	0.000302869
Rnf19b	0.847298	2.33333	0.581	0.035	0.000228489
Mrpl20	0.846684	2.3319	0.645	0.07	0.000586278
Kdm6a	0.846455	2.33137	0.71	0.105	0.00168431
Creld2	0.843928	2.32548	0.452	0.035	0.0305624
Git2	0.838382	2.31262	0.581	0.053	0.000983432
Lman1	0.837865	2.31143	0.613	0.035	0.000270901
Arpc1b	0.836327	2.30787	0.968	0.281	0.00459242
Psma2	0.834541	2.30376	0.839	0.175	0.000844269
Acsl5	0.834423	2.30348	0.548	0.07	0.0278455
Snap23	0.833028	2.30027	0.484	0.035	0.0137279
Ranbp1	0.832827	2.29981	0.71	0.123	0.00250743
Tmem167	0.828532	2.28995	0.613	0.088	0.00420295
Gna13	0.819595	2.26958	0.774	0.105	4.57e-05
Itm2b	0.81938	2.26909	1	0.386	0.0119842
Mrpl14	0.81649	2.26254	0.452	0.035	0.0424214
Lman2	0.81284	2.2543	0.548	0.07	0.0262333
Pdia4	0.811384	2.25102	0.839	0.158	0.00232063
Nfx1	0.809245	2.24621	0.581	0.053	0.00120019	yes
Clic4	0.802955	2.23213	0.774	0.175	0.0144542
Tmem14c	0.801019	2.22781	0.806	0.14	0.00403088
Noa1	0.800811	2.22735	0.419	0.018	0.0238126
Tyrobp	0.794886	2.21419	0.742	0.105	0.000570981
Cebpb	0.794467	2.21326	0.484	0.018	0.00184691	yes
Ndufs4	0.793035	2.21009	0.548	0.053	0.00173366
Syngr2	0.792572	2.20907	0.677	0.07	0.000392643
Ccar1	0.788599	2.20031	0.645	0.123	0.0363184
Slc25a3	0.788126	2.19927	1	0.281	0.00183296
Lonp2	0.784769	2.1919	0.548	0.07	0.0152457
Ndufa2	0.784575	2.19148	0.774	0.14	0.00420595
Itgb2	0.773706	2.16778	0.613	0.088	0.00603413
Pgd	0.772777	2.16577	0.548	0.035	0.00133488
Fkbp8	0.772423	2.16501	0.645	0.123	0.0107818
Jun	0.761042	2.14051	0.903	0.175	0.000719437	yes
Pebp1	0.758489	2.13505	0.613	0.07	0.000920076
Nudcd2	0.756107	2.12997	0.452	0	0.00138651
Strap	0.754009	2.1255	0.677	0.123	0.0023991
Pdcd11	0.751739	2.12068	0.548	0.053	0.0223499
Idh3b	0.750992	2.1191	0.548	0.07	0.0262333
Sbf1	0.748978	2.11484	0.452	0.018	0.00803184
Anapc5	0.74594	2.10842	0.871	0.193	0.00128334
Dcun1d5	0.740305	2.09657	0.645	0.053	0.000164703
Rgs1	0.73989	2.09571	0.581	0	6.44e-06
Srprb	0.738155	2.09207	0.452	0.018	0.00748033
Cxcl2	0.738112	2.09198	0.387	0	0.0173293
Cox8a	0.733379	2.0821	0.871	0.158	0.000195744
Prkcsh	0.733214	2.08176	0.452	0.018	0.0122635
Sf3b2	0.732951	2.08121	0.839	0.228	0.0114383
Wdr36	0.732456	2.08018	0.387	0	0.0173293
Kpnb1	0.731681	2.07857	0.806	0.175	0.0058148
Uck2	0.72942	2.07388	0.613	0.053	0.000872261
Gls	0.728446	2.07186	0.613	0.035	0.000101598
Plxnc1	0.725495	2.06575	0.677	0.123	0.0316909
Nsun2	0.724806	2.06433	0.742	0.07	5.23e-05
Cdk4	0.721788	2.05811	0.742	0.105	0.000570981
Rbm8a	0.719477	2.05336	0.581	0.088	0.0166672
Rhob	0.719364	2.05313	0.548	0.053	0.0113096
Tagln2	0.716261	2.04677	0.742	0.053	3.26e-06
Gnai3	0.714584	2.04334	0.71	0.105	0.00101411
Ndufs6	0.714448	2.04306	0.742	0.14	0.00512546
Kpna3	0.711322	2.03668	0.806	0.158	0.00352213
Cacnb3	0.710851	2.03572	0.419	0	0.00496383
Rnf130	0.707615	2.02915	0.548	0.07	0.0105542
Ms4a6b	0.705647	2.02516	0.516	0.035	0.00790482
Trbc1	0.705385	2.02463	0.613	0.053	0.00036729
Rassf4	0.705047	2.02394	0.452	0.018	0.0151183
Hars	0.704021	2.02187	0.548	0.053	0.00997439
Clns1a	0.703811	2.02144	0.484	0.035	0.0065579
Mrpl52	0.703464	2.02074	0.774	0.105	6.29e-05
Slc25a11	0.700392	2.01454	0.548	0.07	0.00992216
Spcs3	0.697407	2.00854	0.742	0.105	0.00020099
Mrps34	0.692225	1.99816	0.452	0	0.00138651
Tmed2	0.68747	1.98868	0.452	0.018	0.00603653
Tmem176a	0.68666	1.98707	0.452	0.018	0.016205
Fabp5	0.683972	1.98173	0.484	0.018	0.00406428
Rsl1d1	0.68116	1.97617	0.71	0.105	0.0065795
Arhgap25	0.681139	1.97613	0.548	0.07	0.0332751
Psma7	0.677662	1.96927	0.839	0.193	0.0108194
Manf	0.67628	1.96655	0.71	0.14	0.0281584
Spop	0.676157	1.96631	0.645	0.123	0.0248215
Cyfip1	0.674984	1.964	0.484	0.035	0.0156696
Chd4	0.670213	1.95465	0.871	0.298	0.0438603
Ppp2r5c	0.670099	1.95443	0.742	0.158	0.00634542
Prpf31	0.66844	1.95119	0.419	0	0.00496383
C1qbp	0.663796	1.94215	0.742	0.105	0.00166803
Icam1	0.662139	1.93893	0.484	0.018	0.00468101
Naa15	0.661918	1.93851	0.613	0.105	0.0369879
Ndufv3	0.660567	1.93589	0.516	0.053	0.0162755
Cope	0.659779	1.93436	0.677	0.088	0.000537929
Itgb1	0.659142	1.93313	0.774	0.14	0.004696
Kpna4	0.656943	1.92889	0.677	0.14	0.0178051
Cox7b	0.656512	1.92806	0.839	0.175	0.000798151
Guk1	0.656251	1.92755	0.419	0.018	0.0238126
Polr2j	0.655014	1.92517	0.484	0.053	0.031622
Lamp2	0.654683	1.92453	0.548	0.053	0.0268353
Ndufa1	0.652927	1.92116	0.774	0.158	0.0020741
Npc2	0.650915	1.91729	0.903	0.175	0.000292154
Lgals3	0.646248	1.90837	0.484	0	0.000377291
Atg3	0.645501	1.90694	0.387	0	0.0173293
Pop1	0.64441	1.90486	0.387	0	0.0173293
Elf1	0.642533	1.90129	0.871	0.228	0.0296705	yes
Cnpy2	0.64136	1.89906	0.452	0.018	0.0151183
Sem1	0.640381	1.8972	0.806	0.193	0.00583791
Psmd7	0.638097	1.89288	0.677	0.123	0.00454084
Dctn2	0.637924	1.89255	0.613	0.07	0.00306703
Pip4k2c	0.635488	1.88794	0.484	0.018	0.00213484
Tlk1	0.630957	1.87941	0.71	0.14	0.011327
Cflar	0.628866	1.87548	0.613	0.053	0.000548974
Ssr4	0.627656	1.87321	0.677	0.123	0.0205654
Mbd1	0.625817	1.86977	0.419	0.018	0.0238126	yes
Thy1	0.625617	1.8694	0.484	0.035	0.0414355
Snrpe	0.622335	1.86327	0.839	0.211	0.00296099
Psmb3	0.621343	1.86143	0.71	0.088	0.00157711
Ppm1a	0.614696	1.8491	0.581	0.07	0.00270046
Dnajc3	0.611284	1.8428	0.774	0.123	0.000457857
Mrpl12	0.610107	1.84063	0.613	0.088	0.00227828
Clec4n	0.610062	1.84055	0.387	0	0.0173293
Cct6a	0.607618	1.83605	0.871	0.246	0.0396322
Ncbp1	0.60534	1.83188	0.548	0.07	0.0112251
Traf1	0.604201	1.82979	0.548	0.018	0.000360314
Ywhab	0.602111	1.82597	0.806	0.211	0.0327392
Rcc2	0.597804	1.81812	0.806	0.193	0.00210453
Cyb561a3	0.597804	1.81812	0.581	0.07	0.0436862
Cmpk1	0.596751	1.81621	0.548	0.07	0.0353015
Tpm4	0.595652	1.81421	0.645	0.105	0.0147548
Smarcd2	0.594961	1.81296	0.613	0.105	0.0141885
Exosc3	0.592726	1.80891	0.613	0.035	0.000155171
Clint1	0.590738	1.80532	0.774	0.14	0.004696
Txn1	0.587515	1.79951	0.839	0.175	0.00436008
Sppl2a	0.585542	1.79596	0.645	0.07	0.00183354
Rpf2	0.581878	1.7894	0.484	0.035	0.0178749
Dad1	0.577797	1.78211	0.742	0.158	0.00387126
Cnp	0.576971	1.78064	0.742	0.14	0.0286231
Irak4	0.576376	1.77958	0.387	0	0.0173293
Ostf1	0.572263	1.77227	0.71	0.14	0.0240302
Adk	0.568769	1.76609	0.419	0.018	0.0238126
Ccr7	0.56843	1.76549	0.677	0.105	0.00303369
Mrpl58	0.567191	1.76331	0.516	0.035	0.00647895
Nadk	0.563092	1.75609	0.613	0.088	0.0308134
Arl2bp	0.561657	1.75358	0.516	0.053	0.0162755
Ccl5	0.560459	1.75148	0.613	0.088	0.0275114
Tcp1	0.558501	1.74805	0.871	0.211	0.00408805
Traf7	0.557531	1.74636	0.452	0.018	0.00603653
Cdc42se1	0.554421	1.74093	0.742	0.14	0.00484911
Rgs10	0.548845	1.73125	0.71	0.07	0.000135698
Dusp2	0.548726	1.73105	0.839	0.193	0.0311622
Mogs	0.540241	1.71642	0.452	0.018	0.016205
Vdac1	0.540128	1.71623	0.677	0.14	0.0440299
Psmb9	0.538846	1.71403	0.613	0.105	0.0487156
Psmd3	0.538785	1.71392	0.71	0.123	0.00198769
Tars	0.537611	1.71191	0.484	0.035	0.0190869
Bax	0.537154	1.71113	0.419	0.018	0.022193
Cct2	0.53579	1.7088	0.935	0.263	0.00542439
Tsnax	0.535415	1.70816	0.516	0.053	0.0343497
Nup93	0.532476	1.70314	0.387	0	0.0173293
Rab8b	0.532376	1.70297	0.613	0.088	0.0195248
Gnb1	0.530292	1.69943	0.71	0.123	0.00975111
Gtpbp4	0.52608	1.69228	0.581	0.07	0.011935
Kars	0.525287	1.69094	0.774	0.105	0.000781667
Dars	0.524851	1.69021	0.677	0.07	0.000192284
Srsf6	0.523254	1.68751	0.903	0.175	0.000434596
Uqcr11	0.52201	1.68541	0.806	0.158	0.0108427
Cnot6	0.517995	1.67866	0.677	0.123	0.0284621
Itgal	0.516371	1.67593	0.484	0.053	0.0489315
Apoe	0.511185	1.66727	0.871	0.175	0.000925535
Hat1	0.504351	1.65591	0.581	0.07	0.0274492
Prdx5	0.503085	1.65382	0.677	0.088	0.00265124
Ndufab1	0.500033	1.64878	0.452	0.018	0.016205
Mcm7	0.498613	1.64644	0.742	0.123	0.0234015
Hspe1	0.497928	1.64531	0.742	0.123	0.00306205
Samsn1	0.497048	1.64386	0.645	0.053	0.000176243
Abce1	0.494578	1.63981	0.71	0.158	0.0479634
Ube2q1	0.488518	1.6299	0.742	0.123	0.00144895
Fos	0.486061	1.6259	0.774	0.158	0.0333515	yes
Mtdh	0.479305	1.61495	0.903	0.193	0.00205463
Nup62	0.475999	1.60962	0.452	0.018	0.016205
Dazap2	0.472735	1.60438	0.871	0.228	0.0282635
Atp5a1	0.46289	1.58866	0.935	0.333	0.0240545
Psmb6	0.462858	1.58861	0.71	0.14	0.0227886
Mlec	0.457854	1.58068	0.774	0.105	9.79e-05
Eif2s1	0.44781	1.56488	0.71	0.123	0.0108896
Nme1	0.444725	1.56006	0.806	0.175	0.0319915
Nhp2	0.44436	1.55949	0.71	0.053	5.06e-05
Mrps7	0.442218	1.55615	0.548	0.053	0.0106218
Nt5c	0.440313	1.55319	0.548	0.053	0.0174797
Sec11c	0.438124	1.5498	0.677	0.14	0.0396439
Ndufb7	0.432995	1.54187	0.871	0.175	0.00143936
Ifitm3	0.432978	1.54184	0.548	0.07	0.0446596
Eif4a1	0.432284	1.54077	0.839	0.193	0.00753627
Plbd1	0.423511	1.52731	0.484	0.035	0.0414355
Ssr2	0.414253	1.51324	0.742	0.105	0.00187505
Eftud2	0.410598	1.50772	0.645	0.105	0.0078701
Tmem176b	0.410436	1.50748	0.452	0.018	0.016205
Psmc4	0.408916	1.50518	0.581	0.07	0.0274492
Cse1l	0.408374	1.50437	0.548	0.07	0.0295529
