# Supplementary material for: Regeneration alters open chromatin andcis-regulatory landscape of erythroid precursors
Source: HighWire-hosted journal article supplement (doi:10.1101/gr.279949.124), 2025-06-02
Supplement: Supplemental_Table_S2.xlsx [file Supplemental_Table_S2.xlsx]

## Sheet: Sheet1
TFBS (Transcription factor binding sites)				ATAC_peak			Annotated		Footprint_score				Footprint_score_Fold_change
Chr	Start	End	Strand	Chr	Start	End	Region	Gene	Day7	Day3	Day1	Day0	Day7/Day3	Day7/Day1	Day7/Day0	Day3/Day1	Day3/Day0	Day1/Day0
chr13	21924675	21924685	+	chr13	21924510	21925109	exon	n-TStga2	5.881	19.707	26.6337	4.18706	0.376664	0.287027	1.25432	0.76203	3.33009	4.37002
chr2	60003483	60003493	-	chr2	60002786	60003991	CDS	Baz2b	16.4463	17.9681	25.7984	10.1575	0.925555	0.66921	1.49788	0.723036	1.61836	2.23828
chr8	11785803	11785813	-	chr8	11785065	11785985	5UTR	Arhgef7	3.71947	15.8071	12.1787	4.16622	0.338778	0.422672	0.932716	1.24764	2.75318	2.20671
chr2	153292806	153292816	-	chr2	153291077	153292980	exon	Kif3b	11.203	23.9648	26.1665	11.7081	0.517302	0.477536	0.964384	0.923126	1.86426	2.01952
chr13	100511325	100511335	+	chr13	100511136	100512333	CDS	Ocln	1.83352	1.97406	5.15463	1.65943	0.968403	0.564631	1.04212	0.583053	1.07613	1.84566
chr4	40801087	40801097	-	chr4	40800944	40801485	3UTR	B4galt1	2.06793	3.38589	6.74335	2.59782	0.775076	0.492737	0.895515	0.635732	1.15539	1.81743
chr1	134835779	134835789	+	chr1	134835177	134836016	CDS	Ppp1r12b	2.8383	1.92892	3.00758	0.54467	1.20656	0.969115	1.75991	0.803205	1.45862	1.81599
chr11	4235470	4235480	+	chr11	4235145	4237999	5UTR	Osm	8.11365	19.6769	12.5283	5.79114	0.477969	0.705726	1.28102	1.47651	2.68012	1.81518
chr8	4051141	4051151	+	chr8	4051055	4052911	NA	NA	1.14193	4.82285	4.51457	1.45788	0.495522	0.517381	0.919639	1.04411	1.8559	1.77749
chr3	96460437	96460447	+	chr3	96459837	96460693	exon	Gm40099	4.78198	14.1882	14.3614	7.50944	0.435462	0.430985	0.72679	0.989712	1.66901	1.68636
chr3	96328166	96328176	-	chr3	96327826	96329044	exon	Gm24830	8.23436	16.1195	12.1316	6.31966	0.575912	0.733165	1.21774	1.27304	2.11446	1.66095
chr7	19327353	19327363	+	chr7	19327134	19327585	NA	NA	29.2378	43.3507	44.0744	25.9283	0.692022	0.681261	1.11652	0.98445	1.61342	1.6389
chr8	122309204	122309214	+	chr8	122309044	122309826	transcript	Zfpm1	28.4987	26.0378	44.1389	26.0385	1.08631	0.664463	1.08628	0.611668	0.999972	1.63483
chr16	8823745	8823755	+	chr16	8823105	8824158	NA	NA	3.2339	3.68737	5.05416	2.16263	0.926395	0.758195	1.23107	0.818435	1.32887	1.62368
chr13	21919290	21919300	+	chr13	21918857	21919612	exon	n-TSaga5	42.398	83.7084	90.1416	54.5682	0.520662	0.484494	0.786642	0.93054	1.51086	1.62364
chr7	3709275	3709285	+	chr7	3708928	3709523	transcript	Rps9	6.21121	8.16831	13.7694	7.55866	0.816096	0.534681	0.865689	0.655169	1.06077	1.61908
chr7	66233519	66233529	+	chr7	66233046	66233969	NA	NA	8.58836	16.0445	18.1961	10.5496	0.597359	0.535178	0.849408	0.895906	1.42193	1.58715
chr8	122330654	122330664	+	chr8	122329460	122330813	CDS	Zfpm1	28.9844	31.0013	33.1266	19.9802	0.939751	0.883646	1.40101	0.940305	1.49083	1.58549
chr9	75356047	75356057	+	chr9	75355756	75356342	transcript	Bcl2l10	14.22	15.7638	20.4387	12.0174	0.915347	0.728585	1.152	0.795961	1.25853	1.58115
chr16	32688990	32689000	+	chr16	32688801	32689346	transcript	Tnk2	2.78624	4.48543	7.49131	4.14287	0.755828	0.527839	0.794963	0.698354	1.05177	1.50607
chr2	103959634	103959644	+	chr2	103959511	103959931	5UTR	Lmo2	7.66012	4.93348	7.12028	3.97145	1.36812	1.05627	1.57233	0.772063	1.14926	1.48856
chr10	82790647	82790657	+	chr10	82790491	82790992	NA	NA	3.89391	4.77303	7.53075	4.31663	0.878686	0.636477	0.937747	0.724351	1.06721	1.47334
chr4	119274799	119274809	-	chr4	119274525	119275847	3UTR	Ybx1	6.2123	7.02816	10.3489	6.40602	0.914136	0.677395	0.978186	0.741023	1.07007	1.44404
chr3	96450187	96450197	-	chr3	96449988	96450445	exon	Gm26232	8.0483	13.6956	14.4923	9.30097	0.650739	0.62018	0.893612	0.953041	1.37323	1.44089
chr9	22515112	22515122	-	chr9	22514858	22515647	CDS	Bbs9	2.9341	6.12796	6.52408	3.8476	0.62869	0.60101	0.855488	0.955978	1.36075	1.42341
chr17	25715633	25715643	+	chr17	25715467	25716490	3UTR	Chtf18	2.75112	3.70079	5.31401	3.01093	0.846194	0.670905	0.952631	0.79285	1.12578	1.41992
chr7	142095338	142095348	-	chr7	142094636	142095935	transcript	Dusp8	47.7171	53.6971	59.1934	41.258	0.893537	0.813898	1.1477	0.910872	1.28444	1.41012
chr4	128668989	128668999	+	chr4	128668691	128669655	NA	NA	0.63015	2.60137	2.90865	1.3593	0.611583	0.576667	0.809768	0.942909	1.32405	1.40422
chr3	121258712	121258722	-	chr3	121258574	121258848	5UTR	Tlcd4	7.00989	7.59408	9.49903	6.11619	0.941975	0.792098	1.10404	0.840891	1.17205	1.39382
chr3	121267616	121267626	+	chr3	121267326	121267848	5UTR	Tlcd4	19.5308	15.4368	14.6953	9.89142	1.22859	1.28165	1.77957	1.04319	1.44847	1.3885
chr8	120369869	120369879	-	chr8	120369786	120370441	NA	NA	13.9136	11.2622	15.9173	10.9686	1.19303	0.891045	1.21909	0.746876	1.02183	1.36814
chr1	82816441	82816451	+	chr1	82815666	82816704	exon	Gm34286	7.32459	10.7726	7.59415	4.94096	0.739699	0.973228	1.32148	1.3157	1.78651	1.35784
chr14	21766631	21766641	-	chr14	21765633	21766865	NA	NA	22.1839	19.5451	17.2166	12.0806	1.11984	1.25227	1.69418	1.11826	1.51288	1.35289
chr11	69881205	69881215	+	chr11	69880513	69881270	exon	Kctd11	8.33599	7.08605	15.8975	11.1071	1.13075	0.588404	0.79595	0.520367	0.703913	1.35273
chr16	17270335	17270345	+	chr16	17269779	17270473	transcript	Tmem191c	2.40526	3.99854	4.61273	2.77265	0.753824	0.688491	0.929973	0.913325	1.23366	1.35074
chr9	22806501	22806511	-	chr9	22805970	22806907	NA	NA	11.0113	6.77257	6.89499	4.49635	1.45843	1.43937	1.93471	0.98693	1.32658	1.34414
chr13	18827407	18827417	+	chr13	18826800	18827623	CDS	Vps41	1.90078	1.78792	1.14304	0.21729	1.02648	1.20952	1.62562	1.17831	1.58368	1.34403
chr2	130279390	130279400	+	chr2	130279239	130280311	exon	Idh3b	6.16448	12.1553	13.597	9.69012	0.59048	0.537509	0.710152	0.910291	1.20267	1.32119
chr8	120492864	120492874	+	chr8	120492851	120493227	exon	Gse1	7.44199	6.48754	7.63469	5.21995	1.10651	0.980935	1.28882	0.886517	1.16476	1.31387
chr14	67890177	67890187	-	chr14	67889552	67890947	CDS	Dock5	6.52608	6.98686	7.15893	4.91437	0.951292	0.934301	1.21815	0.98214	1.28052	1.30382
chr4	119274968	119274978	-	chr4	119274525	119275847	3UTR	Ybx1	2.83186	1.6628	5.08883	3.34785	1.28263	0.701556	0.911364	0.546969	0.710546	1.29906
chr7	142095311	142095321	-	chr7	142094636	142095935	transcript	Dusp8	47.3653	34.7408	43.163	32.712	1.33924	1.09208	1.41646	0.815451	1.05766	1.29702
chr4	117202433	117202443	-	chr4	117201945	117203323	exon	Gm23143	6.5247	10.3642	11.2119	8.099	0.700924	0.657508	0.851094	0.938059	1.21425	1.29443
chr2	13413446	13413456	-	chr2	13413363	13414147	NA	NA	1.65889	2.63279	4.01798	2.58945	0.80928	0.636592	0.816209	0.786621	1.00856	1.28215
chr1	91373800	91373810	+	chr1	91373021	91374460	3UTR	Ilkap	37.5419	48.2466	40.6879	31.4708	0.788947	0.927108	1.17886	1.17513	1.49422	1.27153
chr6	52692258	52692268	+	chr6	52691097	52693290	exon	Gm52884	5.87128	4.02663	8.46664	6.18435	1.28378	0.76277	0.963843	0.594159	0.750784	1.26361
chr9	107308307	107308317	+	chr9	107307305	107308401	transcript	Cish	4.13428	4.83984	9.32841	6.89568	0.903527	0.559896	0.705271	0.619678	0.780575	1.25965
chr7	34147193	34147203	+	chr7	34147043	34147699	CDS	Uba2	3.93839	6.47108	7.24761	5.26991	0.716848	0.659589	0.82805	0.920117	1.15512	1.2554
chr5	121593875	121593885	+	chr5	121593050	121594449	transcript	Aldh2	29.0785	21.6398	26.4327	20.7095	1.30849	1.09153	1.36099	0.834191	1.04013	1.24687
chr7	142095382	142095392	+	chr7	142094636	142095935	transcript	Dusp8	60.307	50.2805	51.4755	40.9467	1.19006	1.1637	1.44588	0.977847	1.21496	1.24249
chr11	88605258	88605268	+	chr11	88604451	88605532	NA	NA	25.3747	37.8586	25.5851	20.1194	0.690474	0.992501	1.2326	1.43742	1.78516	1.24192
chr5	115634161	115634171	+	chr5	115634019	115634461	exon	Rab35	44.0792	52.1409	47.7107	38.1854	0.852387	0.927636	1.14495	1.08828	1.34323	1.23427
chr12	59040267	59040277	-	chr12	59039654	59041197	exon	Gm22973	12.1415	29.1304	15.5851	12.2368	0.462447	0.809313	0.993526	1.75007	2.14841	1.22762
chr4	3083938	3083948	+	chr4	3082621	3084399	NA	NA	3.33364	2.12257	3.92562	2.74317	1.2635	0.907494	1.11319	0.718241	0.88104	1.22666
chr19	4477626	4477636	+	chr19	4477419	4478538	transcript	Syt12	4.84888	5.7891	5.69641	4.19918	0.88621	0.896267	1.09736	1.01135	1.23826	1.22438
chr9	43224906	43224916	-	chr9	43224810	43225516	CDS	Oaf	6.06557	4.524	4.25721	3.02527	1.2203	1.26866	1.55289	1.03964	1.27255	1.22403
chr4	120684072	120684082	+	chr4	120683008	120684114	NA	NA	2.18498	1.80669	2.10122	1.27795	1.08838	1.01831	1.24177	0.935617	1.14094	1.21945
chr6	134218071	134218081	-	chr6	134217690	134218303	transcript	Gm38908	4.71674	8.85828	6.26227	4.70546	0.634525	0.823083	1.00157	1.29716	1.57846	1.21686
chr4	115856398	115856408	+	chr4	115856070	115856812	5UTR	Mknk1	14.6378	16.412	12.8793	10.1752	0.906055	1.11454	1.3528	1.2301	1.49307	1.21377
chr9	21237470	21237480	+	chr9	21237412	21238004	CDS	Keap1	14.8164	6.49103	11.9937	9.47513	1.92869	1.19511	1.44702	0.619648	0.750259	1.21078
chr4	89386983	89386993	-	chr4	89386937	89387607	exon	Gm12610	1.20608	1.9651	2.32918	1.49892	0.828998	0.766156	0.926286	0.924196	1.11735	1.209
chr5	146866566	146866576	+	chr5	146865879	146868219	exon	Gm38748	50.5762	50.455	50.4959	41.8097	1.00229	1.00152	1.19797	0.999231	1.19523	1.19615
chr9	107571163	107571173	-	chr9	107570831	107571658	exon	Hyal2	54.7534	61.5926	45.776	38.014	0.893246	1.18606	1.41345	1.3278	1.58236	1.19172
chr3	85588920	85588930	-	chr3	85588634	85589078	transcript	Gm46809	14.9601	19.8793	19.9158	16.327	0.779926	0.778657	0.927295	0.998372	1.18894	1.19089
chr6	108427218	108427228	+	chr6	108425637	108427346	CDS	Itpr1	4.37233	6.19416	4.86098	3.68585	0.789817	0.933376	1.11145	1.18176	1.40723	1.19078
chr3	157631556	157631566	+	chr3	157631328	157631753	NA	NA	13.0626	12.6655	9.07135	7.28308	1.02623	1.34571	1.59236	1.31132	1.55167	1.18329
chr3	40694352	40694362	-	chr3	40693357	40694904	CDS	Intu	13.1749	13.6257	13.7012	11.2051	0.972001	0.967464	1.144	0.995332	1.17696	1.18248
chr14	99229633	99229643	+	chr14	99228449	99229905	exon	Pibf1	3.38379	4.01695	4.71083	3.61228	0.902451	0.815293	0.962454	0.903421	1.06649	1.18051
chr6	118729394	118729404	-	chr6	118728607	118729609	CDS	Cacna1c	3.36571	1.79263	3.31846	2.44828	1.36872	1.00816	1.1864	0.736568	0.866787	1.1768
chr2	103298968	103298978	+	chr2	103298559	103299605	CDS	Ehf	8.6395	13.7413	6.72581	5.42851	0.685363	1.20802	1.40634	1.76261	2.05197	1.16417
chr6	66051729	66051739	+	chr6	66051641	66052987	NA	NA	4.08327	3.2076	4.35281	3.40237	1.15413	0.960515	1.11588	0.832239	0.966854	1.16175
chr3	19635550	19635560	-	chr3	19634500	19635894	exon	n-TAagc14	2.71359	2.62517	3.42342	2.6158	1.01734	0.879631	1.01922	0.864633	1.00184	1.15869
chr2	25502915	25502925	-	chr2	25502501	25503325	5UTR	Fbxw5	19.3977	52.8839	38.5577	33.1782	0.395092	0.533038	0.613468	1.34915	1.55272	1.15089
chr16	32696561	32696571	-	chr16	32696535	32698065	NA	NA	3.99651	2.62013	3.81831	2.99962	1.27021	1.02832	1.18214	0.809571	0.930663	1.14958
chr3	51878212	51878222	-	chr3	51878144	51879133	NA	NA	5.21065	5.18804	6.47304	5.31843	1.00295	0.858899	0.986171	0.856372	0.983264	1.14818
chr17	12185986	12185996	-	chr17	12185443	12186863	NA	NA	38.5212	21.641	27.0578	23.269	1.69999	1.38818	1.59249	0.816577	0.936759	1.14718
chr15	12230383	12230393	+	chr15	12230005	12230862	5UTR	Mtmr12	43.4682	71.5871	55.253	48.1711	0.620327	0.795851	0.907142	1.28295	1.46236	1.13984
chr9	56973789	56973799	+	chr9	56973403	56974662	transcript	Snupn	2.60323	1.80782	2.83667	2.2012	1.18578	0.956038	1.086	0.806256	0.915854	1.13593
chr13	95680027	95680037	-	chr13	95678993	95680109	exon	Gm33074	3.40959	2.95523	2.9828	2.35839	1.0837	1.07822	1.21755	0.994946	1.12352	1.12922
chr19	53802452	53802462	-	chr19	53801488	53802658	transcript	Rbm20	24.7539	12.1694	9.80094	8.45869	1.85942	2.2182	2.49054	1.19296	1.33943	1.12278
chr2	22781546	22781556	+	chr2	22781311	22782815	5UTR	Apbb1ip	7.59146	12.0533	9.29089	8.02439	0.692857	0.855548	0.958759	1.23481	1.38378	1.12065
chr8	18638998	18639008	-	chr8	18638889	18639489	CDS	Mcph1	3.2247	2.53584	2.61241	2.08351	1.13751	1.12039	1.25042	0.984948	1.09926	1.11606
chr7	121939988	121939998	+	chr7	121939646	121940152	CDS	Cog7	22.0569	15.4187	20.9637	18.5332	1.37101	1.04664	1.16774	0.76341	0.851743	1.11571
chr19	32485150	32485160	-	chr19	32485009	32485266	5UTR	Minpp1	28.1314	20.3539	21.954	19.4648	1.3407	1.25288	1.39504	0.934496	1.04053	1.11346
chr12	86913420	86913430	+	chr12	86913258	86913951	NA	NA	3.71164	6.25951	6.07233	5.2134	0.708255	0.723763	0.804637	1.0219	1.13608	1.11174
chr3	84772093	84772103	+	chr3	84771812	84772717	transcript	Gm40079	72.7066	64.6889	64.7028	57.9864	1.11938	1.11915	1.24347	0.999792	1.11085	1.11109
chr15	39958187	39958197	+	chr15	39957257	39958307	NA	NA	1.1582	1.06029	2.62607	2.11941	1.02771	0.712163	0.790726	0.692968	0.769408	1.11031
chr3	96333325	96333335	+	chr3	96332613	96333543	exon	n-TVcac10	3.1897	6.16748	4.88694	4.17038	0.655392	0.769413	0.852399	1.17397	1.30058	1.10785
chr13	21937350	21937360	+	chr13	21936925	21937425	exon	n-TSaga1	10.1268	15.9909	16.323	14.5031	0.682414	0.670356	0.742221	0.98233	1.08764	1.1072
chr10	20257485	20257495	-	chr10	20257005	20258070	CDS	Map7	19.9476	14.931	9.52382	8.38468	1.28823	1.86884	2.0649	1.4507	1.6029	1.10491
chr7	45233371	45233381	-	chr7	45232919	45233902	transcript	Tead2	2.35415	4.49826	4.72365	4.04208	0.692464	0.670779	0.740946	0.968685	1.07001	1.1046
chr18	65005754	65005764	-	chr18	65005534	65006425	5UTR	Nedd4l	3.68453	3.12495	5.5278	4.77181	1.09995	0.769632	0.849938	0.699696	0.772705	1.10434
chr1	179076022	179076032	+	chr1	179075899	179077100	transcript	Smyd3	1.31471	1.51498	2.69933	2.21714	0.94979	0.732337	0.807615	0.771052	0.85031	1.1028
chr17	46139040	46139050	+	chr17	46138533	46139755	transcript	Rsph9	19.923	24.191	33.9597	30.8009	0.839935	0.614728	0.673085	0.731875	0.801353	1.09493
chr4	138934099	138934109	+	chr4	138933631	138934335	exon	Gm18097	3.96924	9.83995	5.80683	5.0898	0.523231	0.77808	0.851843	1.48707	1.62804	1.0948
chr15	96802568	96802578	+	chr15	96801971	96803109	NA	NA	14.2773	7.83897	15.0525	13.5575	1.62432	0.955766	1.0449	0.588413	0.643285	1.09326
chr3	135641678	135641688	+	chr3	135641008	135642056	NA	NA	27.1112	22.066	27.5894	25.1282	1.20559	0.984095	1.07184	0.816277	0.889058	1.08917
chr18	70553323	70553333	+	chr18	70552746	70553764	exon	Gm31671	94.4301	68.1344	52.0383	47.736	1.37242	1.77766	1.92999	1.29528	1.40627	1.08569
chr5	115564593	115564603	-	chr5	115564409	115565809	exon	Gcn1	10.6249	10.0882	17.0449	15.631	1.04273	0.671082	0.723493	0.643584	0.693847	1.0781
chr13	19623033	19623043	-	chr13	19622656	19623808	5UTR	Sfrp4	30.179	48.4115	35.1582	32.7985	0.641695	0.867689	0.925734	1.35218	1.44264	1.0669
chr11	62605708	62605718	-	chr11	62605151	62606945	CDS	Lrrc75a	5.95573	16.5229	12.3113	11.4307	0.443732	0.570133	0.60624	1.28486	1.36623	1.06333
chr6	41113192	41113202	+	chr6	41112914	41114611	CDS	Trbv12-1	7.62886	8.5582	7.15598	6.7254	0.915759	1.04911	1.09821	1.14561	1.19924	1.04681
chr2	131186658	131186668	-	chr2	131186323	131187669	5UTR	Cdc25b	11.0803	7.99768	10.8561	10.3766	1.29439	1.01682	1.05476	0.785558	0.814875	1.03732
chr15	63657910	63657920	+	chr15	63657299	63659050	NA	NA	1.44311	2.15718	2.86951	2.70473	0.845801	0.733043	0.756368	0.866685	0.894262	1.03182
chr2	79099558	79099568	-	chr2	79099483	79100159	NA	NA	6.16977	5.39557	4.831	4.66354	1.09838	1.18328	1.21104	1.07729	1.10256	1.02346
chr14	20169417	20169427	+	chr14	20169281	20169568	NA	NA	7.17603	7.45049	9.75619	9.52637	0.972345	0.789029	0.804141	0.81147	0.827012	1.01915
chr9	120002157	120002167	+	chr9	120001819	120002635	exon	Gm33800	5.22328	6.79942	7.35856	7.21584	0.830033	0.782829	0.794357	0.943131	0.957026	1.01473
chr10	127195964	127195974	+	chr10	127194447	127196051	exon	F420014N23Rik	7.03578	5.57413	8.60489	8.44488	1.18162	0.858363	0.870943	0.726427	0.737073	1.01466
chr3	153910618	153910628	+	chr3	153910041	153910710	CDS	Rabggtb	7.15823	7.27497	9.58378	9.46657	0.988025	0.798835	0.806675	0.808517	0.816452	1.00981
chr16	91448567	91448577	-	chr16	91446966	91448722	NA	NA	7.96473	4.50366	5.69988	5.64494	1.49605	1.2771	1.28574	0.853646	0.859423	1.00677
chr13	111657314	111657324	-	chr13	111655302	111657637	NA	NA	5.84032	3.36578	3.82954	3.79353	1.42376	1.31901	1.32659	0.926421	0.931747	1.00575
chr13	107075010	107075020	-	chr13	107074482	107075696	exon	Gm31452	2.14599	4.20183	3.47126	3.48804	0.692032	0.777072	0.774888	1.12289	1.11973	0.997183
chr8	70893767	70893777	+	chr8	70893611	70894016	3UTR	Rpl18a	69.595	85.5378	96.3786	97.2147	0.818855	0.729055	0.722941	0.890335	0.882868	0.991614
chr1	133745175	133745185	+	chr1	133744940	133746166	transcript	Atp2b4	9.69435	8.34084	11.1434	11.2902	1.12516	0.893587	0.884056	0.794187	0.785716	0.989334
chr13	34330276	34330286	+	chr13	34330260	34330932	NA	NA	5.81959	4.22413	2.85221	2.9171	1.2382	1.55716	1.53842	1.2576	1.24246	0.987964
chr6	99107318	99107328	+	chr6	99105791	99108121	exon	Gm19665	22.4816	20.5225	16.3538	16.78	1.08519	1.32548	1.29613	1.22142	1.19438	0.97786
chr13	59890356	59890366	-	chr13	59889687	59892274	exon	Gm19866	3.9733	2.96714	5.51238	5.69572	1.18493	0.807279	0.78916	0.68129	0.665998	0.977555
chr14	30513208	30513218	+	chr14	30512583	30513554	CDS	Dcp1a	22.5794	48.4042	24.7458	25.5096	0.492416	0.920411	0.895286	1.86917	1.81815	0.972709
chr5	77092205	77092215	+	chr5	77091858	77092359	exon	LOC115490297	8.42204	12.2604	8.29729	8.6538	0.739489	1.01158	0.979169	1.36794	1.32412	0.96796
chr10	44755598	44755608	+	chr10	44755105	44755871	NA	NA	8.54707	6.01428	12.9516	13.5457	1.2984	0.714462	0.687962	0.550262	0.529855	0.962915
chr17	35051968	35051978	-	chr17	35051683	35052170	CDS	Clic1	26.7362	57.1031	51.6386	53.8048	0.490291	0.539801	0.519023	1.10098	1.05861	0.961507
chr5	34881292	34881302	+	chr5	34880845	34881607	CDS	Htt	72.0379	72.6536	47.4043	49.4593	0.991806	1.49388	1.43476	1.50623	1.44662	0.960428
chr8	10995745	10995755	+	chr8	10995410	10997485	transcript	Irs2	4.71223	3.97586	4.68462	5.00246	1.11418	1.00385	0.961181	0.900988	0.862682	0.957484
chr15	62037986	62037996	-	chr15	62037631	62039494	exon	Pvt1	32.7573	17.7555	26.4925	27.7796	1.7416	1.21628	1.16454	0.698368	0.668658	0.957457
chr6	85357006	85357016	-	chr6	85356707	85357984	NA	NA	2.09048	1.77058	3.13517	3.39948	1.07538	0.81374	0.77712	0.756703	0.722651	0.954998
chr8	46587916	46587926	-	chr8	46587672	46588411	CDS	Primpol	35.1029	31.3681	20.7824	22.1403	1.11036	1.61577	1.52663	1.45517	1.37489	0.944832
chr7	141563028	141563038	-	chr7	141562844	141563328	exon	Ap2a2	11.9905	7.12676	9.49401	10.3022	1.50662	1.2086	1.13215	0.802198	0.751451	0.93674
chr1	64796959	64796969	+	chr1	64796882	64798470	NA	NA	2.18001	2.55834	2.14061	2.46586	0.924817	1.00854	0.942131	1.09053	1.01872	0.934153
chr7	90146511	90146521	-	chr7	90145981	90146759	NA	NA	40.7007	39.3537	47.2818	50.8285	1.03221	0.867731	0.809992	0.840657	0.78472	0.93346
chr16	76294740	76294750	+	chr16	76293469	76294853	start_codon	Nrip1	3.62696	2.45245	2.94284	3.40811	1.23843	1.12631	1.03721	0.909465	0.837523	0.920896
chr2	118663217	118663227	+	chr2	118663149	118664161	5UTR	Pak6	18.5923	28.8284	23.502	25.846	0.672991	0.810992	0.743864	1.20506	1.10532	0.917233
chr19	9027041	9027051	-	chr19	9025975	9027076	transcript	Ahnak	3.1776	2.24654	2.90952	3.41773	1.19725	1.0498	0.959238	0.876843	0.801203	0.913736
chr4	152263611	152263621	+	chr4	152262731	152264168	CDS	Acot7	3.19174	4.0982	2.71882	3.22967	0.862066	1.09107	0.993347	1.26565	1.15229	0.91043
chr11	53662877	53662887	-	chr11	53662706	53663929	CDS	Rad50	2.75218	3.29355	3.07216	3.61791	0.90613	0.942301	0.857881	1.03992	0.946753	0.910411
chr5	146844541	146844551	-	chr5	146844223	146845558	5UTR	Rasl11a	3.19132	5.55628	5.72264	6.54977	0.705481	0.691164	0.627806	0.979705	0.889897	0.908337
chr16	20706754	20706764	+	chr16	20706540	20707101	CDS	Clcn2	6.43044	8.91966	6.31381	7.23498	0.781517	1.01327	0.917131	1.29654	1.17353	0.905119
chr12	33335082	33335092	+	chr12	33333950	33335837	transcript	Atxn7l1	40.4381	23.8553	25.6412	29.4106	1.62983	1.5263	1.34586	0.93648	0.825763	0.88178
chr1	178676075	178676085	+	chr1	178675221	178676407	NA	NA	32.4153	29.936	26.2705	30.4008	1.0765	1.21377	1.06128	1.12753	0.985864	0.87436
chr14	79519083	79519093	-	chr14	79518587	79519329	5UTR	Elf1	10.1946	9.04898	7.82589	9.36652	1.09943	1.22998	1.06994	1.11875	0.973181	0.869881
chr6	41706198	41706208	+	chr6	41705986	41706824	exon	Gm38796	4.23576	9.06001	8.18274	9.79186	0.581725	0.629614	0.547014	1.08232	0.940331	0.868808
chr17	23550602	23550612	+	chr17	23550002	23551212	exon	6330415G19Rik	41.3165	42.5842	40.7959	47.3836	0.971866	1.01204	0.878309	1.04133	0.903734	0.867869
chr11	119817548	119817558	+	chr11	119817125	119818333	CDS	Rptor	14.044	15.2462	12.5529	14.9957	0.932154	1.09923	0.94552	1.17924	1.01434	0.860168
chr1	75479503	75479513	+	chr1	75478719	75479861	5UTR	Chpf	54.6684	53.3486	49.6863	58.9238	1.02364	1.09552	0.930688	1.07021	0.909194	0.849544
chr14	41025631	41025641	-	chr14	41025131	41026629	NA	NA	14.3894	19.3727	13.1532	15.9564	0.771892	1.07911	0.914972	1.398	1.18536	0.847902
chr12	100999498	100999508	-	chr12	100998624	100999861	transcript	Ccdc88c	21.8884	19.1807	11.6715	14.2307	1.12504	1.72229	1.45843	1.53087	1.29634	0.846798
chr5	143512575	143512585	-	chr5	143512069	143512685	CDS	Rac1	7.44426	11.3032	9.18952	11.3067	0.719896	0.850363	0.719711	1.18123	0.999744	0.846358
chr17	83862693	83862703	+	chr17	83861510	83862828	transcript	n-TIaat17	24.9329	13.7716	21.8188	26.2434	1.68706	1.12819	0.954363	0.668737	0.5657	0.845924
chr4	3084064	3084074	+	chr4	3082621	3084399	NA	NA	3.34619	2.26654	2.71629	3.66852	1.22777	1.12137	0.947521	0.913344	0.771742	0.844969
chr1	75479548	75479558	+	chr1	75478719	75479861	5UTR	Chpf	62.0145	67.4444	64.2077	77.2906	0.92234	0.967109	0.808483	1.04854	0.876557	0.83598
chr11	76243714	76243724	-	chr11	76242475	76244533	CDS	Glod4	32.0218	24.3438	38.1619	46.3205	1.2863	0.848896	0.70696	0.659951	0.549606	0.832793
chr6	88255684	88255694	-	chr6	88255372	88255837	3UTR	Eefsec	55.2162	54.1021	43.7055	53.3156	1.01969	1.24927	1.03407	1.22513	1.0141	0.827746
chr4	3084377	3084387	+	chr4	3082621	3084399	NA	NA	5.13114	1.25926	2.7872	3.96731	2.03723	1.44554	1.18069	0.709562	0.579556	0.81678
chr10	111580374	111580384	+	chr10	111580296	111581362	exon	4933440J02Rik	5.76919	6.43041	5.03819	6.77681	0.925741	1.09732	0.891076	1.18534	0.962554	0.81205
chr8	23048395	23048405	+	chr8	23048007	23048932	NA	NA	5.06343	2.47669	3.2455	4.60238	1.52254	1.31787	1.06516	0.865575	0.699594	0.808242
chr1	77282065	77282075	+	chr1	77281445	77282454	NA	NA	4.57965	6.60567	8.04299	10.551	0.776851	0.670677	0.541536	0.863328	0.697087	0.807442
chr16	49876562	49876572	-	chr16	49876237	49877613	CDS	Cd47	3.65711	5.24058	5.78549	7.75803	0.794732	0.742298	0.599192	0.934023	0.753955	0.807212
chr5	115565747	115565757	+	chr5	115564409	115565809	exon	Gcn1	7.57591	6.25958	7.14577	9.45146	1.15073	1.04472	0.842723	0.907878	0.732337	0.806653
chr7	133124149	133124159	-	chr7	133122919	133124870	transcript	Ctbp2	13.1263	15.0931	21.0939	27.3311	0.888036	0.661925	0.523405	0.745381	0.589396	0.790732
chr1	54902692	54902702	-	chr1	54902538	54903497	NA	NA	0.99041	2.42885	4.20661	5.97987	0.706587	0.518548	0.409777	0.733877	0.579934	0.790233
chr10	81152771	81152781	-	chr10	81152337	81153082	transcript	Zbtb7a	4.42759	4.21832	3.28895	4.86637	1.03127	1.19759	0.94022	1.16128	0.911712	0.78509
chr3	84654481	84654491	+	chr3	84653802	84655087	NA	NA	19.5855	24.3758	20.6559	27.1783	0.821584	0.953722	0.743936	1.16083	0.905483	0.780029
chr13	81643328	81643338	+	chr13	81642233	81643642	NA	NA	4.06474	5.67738	3.87595	5.71424	0.802153	1.02973	0.798542	1.28371	0.995498	0.775485
chr3	89148232	89148242	-	chr3	89146947	89148301	stop_codon	Hcn3	7.10854	7.1045	6.87041	9.77562	1.00042	1.02549	0.782265	1.02505	0.781935	0.762823
chr3	123575515	123575525	+	chr3	123575487	123577284	3UTR	Ndst3	3.14312	2.54235	2.96614	4.74481	1.11977	1.03253	0.778112	0.922097	0.694882	0.753594
chr12	16034133	16034143	-	chr12	16033053	16034167	NA	NA	1.78854	1.84478	0.90816	2.15297	0.986978	1.26033	0.921234	1.27696	0.933389	0.730943
chr15	12896850	12896860	-	chr15	12895432	12896879	CDS	Drosha	4.52652	3.11207	3.34059	5.55164	1.25323	1.20397	0.872266	0.960695	0.696015	0.724491
chr4	3082639	3082649	+	chr4	3082621	3084399	NA	NA	3.74263	1.58677	1.77985	3.3988	1.53095	1.46145	1.05855	0.954608	0.691432	0.724315
chr13	95679940	95679950	-	chr13	95678993	95680109	exon	Gm33074	6.57926	5.68969	4.88764	7.74817	1.10897	1.2298	0.885645	1.10895	0.798619	0.720155
chr11	77491446	77491456	-	chr11	77491096	77492022	NA	NA	9.06065	10.4653	9.33423	13.9665	0.89144	0.97683	0.701595	1.09579	0.787035	0.718236
chr10	67297162	67297172	-	chr10	67295384	67297489	transcript	Gm46200	13.6294	7.01146	4.07555	6.71636	1.69772	2.45879	1.75224	1.44829	1.03211	0.712642
chr9	120002171	120002181	-	chr9	120001819	120002635	exon	Gm33800	7.8007	8.5922	12.8164	19.8766	0.928472	0.671961	0.459699	0.723728	0.49511	0.68411
chr12	110782800	110782810	+	chr12	110781900	110782869	exon	Wdr20	2.94748	3.63232	3.22466	5.90793	0.887839	0.951358	0.64679	1.07154	0.7285	0.67986
chr4	57797732	57797742	-	chr4	57797617	57798853	NA	NA	9.27911	7.524	9.28472	15.0298	1.17555	0.999522	0.671454	0.850256	0.571181	0.671775
chr3	86135406	86135416	+	chr3	86135333	86136642	3UTR	Rps3a1	3.3018	4.36653	4.25493	7.81065	0.844342	0.858345	0.561579	1.01658	0.665108	0.654257
chr9	3328644	3328654	-	chr9	3327409	3328990	NA	NA	5.85305	4.86417	3.75502	7.15608	1.13476	1.33683	0.864687	1.17807	0.761993	0.646817
chr16	91056182	91056192	-	chr16	91055708	91057646	transcript	4932438H23Rik	10.0385	9.50391	10.5947	19.3282	1.04463	0.957437	0.573899	0.916534	0.549381	0.599412
chr10	41189808	41189818	+	chr10	41189154	41190158	exon	Fig4	14.7134	10.6082	3.79413	8.22708	1.31381	2.74214	1.60616	2.08716	1.22251	0.585731
chr6	134082401	134082411	+	chr6	134082241	134083801	NA	NA	11.1792	19.5297	12.5303	23.2967	0.62049	0.909951	0.529789	1.4665	0.853824	0.582217

## Sheet: README
Supplemental Table 2: TOBIAS Footprint Scores for AP-1 motifs across all ATAC-seq peaks with differential accessibility between days 0-7 post-PHZ.
