# Supplementary material for: Regeneration alters open chromatin andcis-regulatory landscape of erythroid precursors
Source: HighWire-hosted journal article supplement (doi:10.1101/gr.279949.124), 2025-06-02
Supplement: Supplemental_Table_S3.xlsx [file Supplemental_Table_S3.xlsx]

## Sheet: Sheet1
TFBS (Transcription factor binding sites)				ATAC_peak			Annotated		Footprint_score				Footprint_score_Fold_change
Chr	Start	End	Strand	Chr	Start	End	Region	Gene	Day7	Day3	Day1	Day0	Day7/Day3	Day7/Day1	Day7/Day0	Day3/Day1	Day3/Day0	Day1/Day0
chr7	109636529	109636538	+	chr7	109635982	109637069	5UTR	Denn2b	1.27081	17.1972	26.3192	4.13109	-2.39324	-2.94289	-0.81875	-0.54965	1.57449	2.12414
chr7	109636550	109636559	+	chr7	109635982	109637069	5UTR	Denn2b	1.97003	17.1972	26.3192	4.13109	-2.14624	-2.69589	-0.57175	-0.54965	1.57449	2.12414
chr17	33499092	33499101	-	chr17	33498872	33499761	NA	NA	2.37701	19.4378	18.1445	2.68272	-2.17544	-2.08767	-0.08818	0.08777	2.08726	1.99949
chr2	39124287	39124296	+	chr2	39123928	39124711	CDS	Scai	7.67304	24.4778	25.3953	5.87026	-1.40936	-1.45765	0.28221	-0.04829	1.69157	1.73986
chr1	155472796	155472805	+	chr1	155472077	155473169	NA	NA	3.08964	9.46734	14.0327	2.90672	-1.10192	-1.56901	0.04823	-0.4671	1.15015	1.61725
chr11	80872687	80872696	+	chr11	80872138	80873448	transcript	Spaca3	3.47482	20.5637	21.3086	5.64354	-1.95339	-1.9993	-0.44846	-0.04591	1.50493	1.55083
chr8	11785672	11785681	-	chr8	11785065	11785985	5UTR	Arhgef7	1.8104	10.8804	8.50795	1.46886	-1.64024	-1.35805	0.11986	0.28219	1.7601	1.47791
chr3	10058592	10058601	+	chr3	10058405	10059272	exon	Gm33365	8.04939	22.0927	23.4138	6.87991	-1.22313	-1.2987	0.16996	-0.07557	1.3931	1.46867
chr11	49743956	49743965	+	chr11	49743589	49744617	NA	NA	2.46896	6.89243	5.81937	0.54113	-0.92218	-0.74663	0.71323	0.17555	1.6354	1.45985
chr3	10042409	10042418	+	chr3	10042077	10043161	exon	Gm33365	2.8304	13.8476	11.6736	2.73579	-1.62159	-1.41535	0.02597	0.20624	1.64756	1.44132
chr16	75852709	75852718	-	chr16	75852223	75852907	3UTR	Samsn1	3.66318	8.33691	10.9251	2.47328	-0.81688	-1.12653	0.31096	-0.30965	1.12784	1.43749
chr2	62319574	62319583	+	chr2	62318999	62320067	exon	Slc4a10	2.35775	9.89893	7.80846	1.4161	-1.35664	-1.08963	0.31277	0.26701	1.6694	1.40239
chr2	180249168	180249177	+	chr2	180248920	180249617	3UTR	Cables2	2.12295	7.94241	10.5503	2.50264	-1.18018	-1.50253	-0.1145	-0.32235	1.06567	1.38802
chr11	102117522	102117531	+	chr11	102117274	102118266	NA	NA	2.23636	7.91582	7.79216	1.50262	-1.14132	-1.12405	0.24432	0.01727	1.38564	1.36837
chr9	100963281	100963290	-	chr9	100962925	100963858	transcript	Stag1	18.2643	49.6723	40.3307	14.1538	-1.33029	-1.04549	0.3187	0.2848	1.64899	1.36419
chr5	105859454	105859463	+	chr5	105858643	105859946	exon	Gm10359	2.79852	6.25116	7.91028	1.59646	-0.72673	-0.97789	0.37333	-0.25116	1.10006	1.35122
chr13	19209900	19209909	+	chr13	19209577	19210523	start_codon	Trgj1	0.98513	3.76523	5.46008	0.71795	-0.85103	-1.19774	0.11598	-0.34671	0.96701	1.31373
chr13	8965439	8965448	+	chr13	8965246	8965677	transcript	Idi2	7.32809	23.0192	31.6079	11.3964	-1.37899	-1.79788	-0.50087	-0.4189	0.87812	1.29702
chr7	118266250	118266259	-	chr7	118265855	118266637	exon	Gm34999	10.4215	20.2988	29.0982	10.5915	-0.82046	-1.29181	-0.01889	-0.47135	0.80157	1.27292
chr13	75367265	75367274	+	chr13	75366703	75367457	NA	NA	1.15551	8.71467	8.93916	2.26839	-1.62429	-1.65295	-0.38587	-0.02866	1.23842	1.26708
chr16	31940782	31940791	-	chr16	31940555	31941185	transcript	Pigz	5.78514	16.3955	20.1461	7.11098	-1.19203	-1.45359	-0.21479	-0.26156	0.97724	1.23879
chr7	34147297	34147306	+	chr7	34147043	34147699	CDS	Uba2	6.59407	18.0169	17.8131	6.21597	-1.17615	-1.16173	0.06145	0.01442	1.2376	1.22318
chr6	118758080	118758089	-	chr6	118757526	118759489	transcript	Cacna1c	29.7447	28.0742	37.9841	15.0477	0.07681	-0.32853	0.87877	-0.40535	0.80196	1.2073
chr6	31612830	31612839	-	chr6	31612675	31614539	exon	Gm31486	11.8365	32.3606	26.443	10.0634	-1.28347	-1.01486	0.19084	0.26861	1.47431	1.2057
chr4	120711570	120711579	-	chr4	120711213	120711885	CDS	Kcnq4	1.35132	8.21832	9.50219	2.73417	-1.48301	-1.64661	-0.44523	-0.1636	1.03778	1.20138
chr11	20029221	20029230	-	chr11	20028896	20029522	transcript	Gm39603	1.5276	10.3426	6.59323	1.50849	-1.67946	-1.18016	0.00691	0.4993	1.68636	1.18707
chr11	75546275	75546284	-	chr11	75545947	75546798	CDS	Slc43a2	4.04205	9.71836	9.11735	2.63484	-0.90395	-0.83102	0.35102	0.07293	1.25497	1.18204
chr5	146693101	146693110	-	chr5	146691682	146693346	NA	NA	7.89358	13.5383	15.3789	5.41718	-0.62712	-0.7841	0.39378	-0.15698	1.0209	1.17788
chr11	117969238	117969247	-	chr11	117968720	117970288	5UTR	Socs3	11.1697	35.2768	44.3521	18.2695	-1.4683	-1.77911	-0.60444	-0.31081	0.86386	1.17467
chr5	105859396	105859405	-	chr5	105858643	105859946	exon	Gm10359	2.01201	4.17177	5.93793	1.33911	-0.56704	-0.90706	0.23449	-0.34002	0.80153	1.14155
chr7	68115527	68115536	+	chr7	68114959	68116037	NA	NA	12.1342	14.1016	18.1212	6.91615	-0.18229	-0.49554	0.63758	-0.31325	0.81987	1.13312
chr2	163458999	163459008	-	chr2	163458320	163459748	exon	Gm39979	3.29368	10.9561	13.6288	4.89779	-1.21946	-1.48131	-0.35404	-0.26185	0.86542	1.12727
chr8	122312722	122312731	+	chr8	122312526	122313759	transcript	Zfpm1	7.76438	12.2091	14.8198	5.45898	-0.52018	-0.75629	0.36807	-0.2361	0.88825	1.12435
chr13	21240908	21240917	-	chr13	21240798	21241324	exon	n-TAtgc11	3.2916	17.2769	13.6384	4.92065	-1.77644	-1.48269	-0.35903	0.29375	1.41741	1.12366
chr5	146700037	146700046	-	chr5	146699418	146700184	exon	Gm34700	6.15999	12.5977	13.0891	4.75023	-0.80377	-0.85006	0.2572	-0.04629	1.06096	1.10726
chr13	19210005	19210014	-	chr13	19209577	19210523	start_codon	Trgj1	1.20935	4.70938	4.73148	0.89797	-0.96372	-0.96815	0.12744	-0.00443	1.09116	1.09559
chr13	21896880	21896889	-	chr13	21896453	21897536	exon	n-TItat14	4.52375	19.2181	15.7859	6.07891	-1.63226	-1.38377	-0.28954	0.24849	1.34272	1.09423
chr6	31587817	31587826	+	chr6	31587626	31588076	NA	NA	5.65136	18.5948	19.6769	8.03594	-1.37465	-1.4469	-0.37127	-0.07226	1.00338	1.07564
chr12	100393653	100393662	-	chr12	100393288	100394101	transcript	Ttc7b	1.27625	5.41568	5.87994	1.57487	-1.07306	-1.15555	-0.11054	-0.08249	0.96251	1.04501
chr14	40992600	40992609	-	chr14	40992036	40992963	3UTR	Prxl2a	10.8295	23.3509	21.5594	9.18793	-0.95697	-0.85325	0.19001	0.10372	1.14698	1.04326
chr13	58477450	58477459	-	chr13	58477296	58477839	transcript	Gm40966	3.58321	11.3237	6.7884	2.0813	-1.18775	-0.61276	0.41114	0.57499	1.59889	1.0239
chr12	78915648	78915657	-	chr12	78915534	78915949	exon	Gm46359	3.21924	12.8599	12.7238	5.07809	-1.42947	-1.4166	-0.40765	0.01287	1.02182	1.00895
chr17	81304843	81304852	+	chr17	81304351	81305420	transcript	Gm33944	1.80749	5.31942	6.89974	2.19103	-0.8642	-1.13058	-0.12378	-0.26638	0.74042	1.0068
chr11	93914680	93914689	+	chr11	93914281	93915272	transcript	Mbtd1	1.62126	4.27089	5.25211	1.37934	-0.71989	-0.91585	0.08785	-0.19596	0.80775	1.0037
chr11	62148644	62148653	-	chr11	62148194	62149265	CDS	Specc1	2.70487	9.4525	10.1722	3.83919	-1.20352	-1.28806	-0.28575	-0.08454	0.91777	1.00231
chr10	93468098	93468107	+	chr10	93467041	93468199	CDS	Lta4h	5.43127	9.06356	15.9669	6.76912	-0.54547	-1.22206	-0.22558	-0.67659	0.3199	0.99649
chr13	75367195	75367204	-	chr13	75366703	75367457	NA	NA	0.79853	4.79897	5.72615	1.63728	-1.15223	-1.32534	-0.32921	-0.17311	0.82301	0.99613
chr11	116307534	116307543	-	chr11	116307161	116308561	exon	Gm26730	7.98884	14.0135	13.0409	5.33796	-0.65611	-0.5684	0.42154	0.08771	1.07765	0.98993
chr13	75367228	75367237	+	chr13	75366703	75367457	NA	NA	0.46541	5.04285	5.72615	1.66175	-1.35471	-1.48024	-0.49268	-0.12553	0.86204	0.98757
chr14	99229004	99229013	+	chr14	99228449	99229905	exon	Pibf1	1.93204	2.32935	3.93711	0.77041	-0.12457	-0.54113	0.44157	-0.41656	0.56614	0.9827
chr5	146693145	146693154	+	chr5	146691682	146693346	NA	NA	6.72794	12.2779	13.6705	5.7615	-0.68091	-0.81106	0.16009	-0.13015	0.841	0.97115
chr11	4235356	4235365	-	chr11	4235145	4237999	5UTR	Osm	6.4586	14.49	9.8888	3.90083	-0.92536	-0.46887	0.48672	0.45649	1.41207	0.95559
chr4	101238740	101238749	+	chr4	101238721	101239937	exon	Gm52754	3.39115	4.53951	5.7427	1.76343	-0.25798	-0.48642	0.46901	-0.22843	0.727	0.95543
chr8	4051155	4051164	-	chr8	4051055	4052911	NA	NA	1.14193	4.82285	5.54281	1.66076	-1.01298	-1.14874	-0.19346	-0.13576	0.81953	0.95529
chr1	171674610	171674619	+	chr1	171674240	171675241	exon	n-THatg1	4.58807	9.2406	18.1905	8.28689	-0.73018	-1.54904	-0.60766	-0.81887	0.12251	0.94138
chr11	120710523	120710532	+	chr11	120709747	120710554	transcript	Aspscr1	2.58461	6.68993	11.4269	4.76551	-0.85727	-1.45843	-0.51718	-0.60116	0.34009	0.94125
chr19	17410996	17411005	-	chr19	17410488	17411585	transcript	Rfk	1.62112	6.54824	4.64132	1.23334	-1.13965	-0.79708	0.14354	0.34257	1.28319	0.94061
chr4	134842162	134842171	-	chr4	134841915	134842489	NA	NA	1.82897	5.43514	6.51627	2.24689	-0.87825	-1.0631	-0.13374	-0.18485	0.74451	0.92936
chr11	62148666	62148675	+	chr11	62148194	62149265	CDS	Specc1	2.11838	9.4525	9.51505	3.83919	-1.37693	-1.38448	-0.45916	-0.00755	0.91777	0.92532
chr17	29499732	29499741	+	chr17	29499695	29501331	transcript	Pim1	5.65642	14.6817	14.5937	6.55367	-1.07732	-1.0699	-0.15103	0.00741	0.92629	0.91887
chr16	29882454	29882463	-	chr16	29882150	29882998	NA	NA	2.17868	3.98589	6.33012	2.20885	-0.47348	-0.92017	-0.00933	-0.44669	0.46415	0.91085
chr12	59040503	59040512	+	chr12	59039654	59041197	exon	Gm22973	12.4746	33.1367	28.7001	14.173	-1.25232	-1.06036	-0.15526	0.19197	1.09707	0.9051
chr8	110933528	110933537	+	chr8	110933248	110933875	5UTR	St3gal2	6.48094	9.00751	10.4099	4.4192	-0.35857	-0.52483	0.37753	-0.16626	0.7361	0.90236
chr13	21234383	21234392	+	chr13	21233592	21234707	exon	n-TAagc17	11.8177	18.5065	41.652	21.1382	-0.55388	-1.62648	-0.72437	-1.0726	-0.17049	0.9021
chr7	13309518	13309527	+	chr7	13309346	13309892	CDS	Lig1	5.20018	7.26756	7.06402	2.63277	-0.34416	-0.31369	0.58764	0.03046	0.93179	0.90133
chr9	88519587	88519596	+	chr9	88518988	88520863	exon	Snhg5	13.2544	21.9924	27.937	13.8279	-0.63744	-0.95124	-0.05167	-0.3138	0.58577	0.89957
chr4	48160590	48160599	-	chr4	48160300	48161180	transcript	Stx17	15.0283	12.7792	14.1514	6.47448	0.19844	0.07415	0.96786	-0.12429	0.76942	0.89371
chr5	142932217	142932226	-	chr5	142931757	142932675	NA	NA	12.8439	20.8725	30.0013	15.0483	-0.608	-1.08415	-0.19398	-0.47615	0.41402	0.89016
chr8	61060681	61060690	+	chr8	61060074	61060890	CDS	Nek1	3.8304	6.45439	8.28429	3.34962	-0.50207	-0.77105	0.11445	-0.26899	0.61652	0.8855
chr8	3480813	3480822	-	chr8	3480286	3480954	transcript	Tex45	1.16222	4.26713	7.23294	2.78193	-0.89062	-1.41667	-0.53155	-0.52605	0.35907	0.88512
chr11	102117596	102117605	+	chr11	102117274	102118266	NA	NA	1.45769	6.35497	6.35472	2.31052	-1.16717	-1.16713	-0.28325	4e-05	0.88392	0.88388
chr13	76055537	76055546	+	chr13	76055335	76056945	CDS	Gpr150	26.2028	24.3294	43.0851	22.2331	0.09747	-0.66786	0.21496	-0.76533	0.11749	0.88283
chr4	132861005	132861014	+	chr4	132860537	132861509	CDS	Stx12	1.66227	6.40529	5.20546	1.69169	-1.10218	-0.89273	-0.01023	0.20945	1.09196	0.88251
chr2	72753029	72753038	-	chr2	72752199	72753663	transcript	Gm30257	8.84365	11.8823	12.9915	5.92586	-0.34312	-0.45049	0.43015	-0.10737	0.77327	0.88064
chr9	107298240	107298249	-	chr9	107298201	107298440	exon	Cish	5.71514	6.72113	12.0849	5.49164	-0.16717	-0.83015	0.03992	-0.66298	0.20709	0.87007
chr11	120710459	120710468	-	chr11	120709747	120710554	transcript	Aspscr1	3.25617	5.9222	9.75847	4.23364	-0.55119	-1.09412	-0.22724	-0.54293	0.32395	0.86688
chr9	22515257	22515266	+	chr9	22514858	22515647	CDS	Bbs9	1.55964	9.36844	8.65381	3.64045	-1.5539	-1.4641	-0.60019	0.0898	0.95371	0.86391
chr15	63731124	63731133	+	chr15	63730200	63731628	transcript	4930449C09Rik	18.185	18.4172	24.5123	12.3848	-0.01613	-0.38546	0.47547	-0.36934	0.49159	0.86093
chr16	30872473	30872482	+	chr16	30871832	30873228	NA	NA	1.90772	4.50677	5.61256	1.98222	-0.67193	-0.88409	-0.02433	-0.21215	0.64761	0.85976
chr11	4236895	4236904	+	chr11	4235145	4237999	5UTR	Osm	17.4261	23.2357	36.449	18.9879	-0.36954	-0.96786	-0.10901	-0.59831	0.26054	0.85885
chr5	76993752	76993761	-	chr5	76992972	76993968	CDS	Srp72	7.00292	11.6886	9.39422	4.07241	-0.57962	-0.32462	0.53374	0.25499	1.11336	0.85836
chr10	66994862	66994871	-	chr10	66994324	66996116	NA	NA	1.19428	4.53805	5.3724	1.86355	-0.9348	-1.09701	-0.2418	-0.1622	0.693	0.85521
chr11	24129773	24129782	-	chr11	24129101	24130641	transcript	Bcl11a	27.8687	37.5228	40.5175	21.2985	-0.39854	-0.50271	0.35206	-0.10417	0.7506	0.85477
chr7	109636012	109636021	+	chr7	109635982	109637069	5UTR	Denn2b	0.63978	1.20931	3.26053	0.70446	-0.24236	-0.88109	-0.02966	-0.63872	0.2127	0.85142
chr16	90234915	90234924	+	chr16	90234639	90236323	CDS	Scaf4	2.59127	3.13612	6.24932	2.36902	-0.1474	-0.78428	0.06474	-0.63688	0.21214	0.84902
chr9	35263635	35263644	-	chr9	35263116	35263751	5UTR	Fam118b	5.96472	6.8083	11.7454	5.46874	-0.13746	-0.75279	0.08739	-0.61532	0.22486	0.84018
chr2	167066708	167066717	-	chr2	167065987	167067447	transcript	Zfas1	10.6271	15.8643	29.5901	15.4882	-0.48518	-1.2913	-0.45529	-0.80611	0.02989	0.83601
chr4	53246470	53246479	-	chr4	53245367	53246937	exon	4930522O17Rik	12.1939	18.191	17.5265	8.73145	-0.49454	-0.44739	0.38847	0.04715	0.88301	0.83586
chr16	30872420	30872429	-	chr16	30871832	30873228	NA	NA	2.11388	7.684	8.18605	3.5226	-1.14678	-1.21638	-0.38634	-0.0696	0.76044	0.83004
chr10	127754772	127754781	-	chr10	127753971	127755935	transcript	Zbtb39	2.62878	5.49172	5.58376	2.06324	-0.64256	-0.65913	0.16948	-0.01657	0.81204	0.82862
chr13	21919360	21919369	-	chr13	21918857	21919612	exon	n-TSaga5	48.6532	91.879	113.768	62.9957	-0.88398	-1.18498	-0.35674	-0.301	0.52725	0.82824
chr13	58477431	58477440	-	chr13	58477296	58477839	transcript	Gm40966	3.58321	11.3237	6.41023	2.5335	-1.18775	-0.55262	0.27458	0.63513	1.46234	0.8272
chr10	93227874	93227883	+	chr10	93227729	93228441	CDS	Cdk17	2.83206	3.55957	6.68827	2.69373	-0.18538	-0.78811	0.03811	-0.60272	0.2235	0.82622
chr5	140609729	140609738	+	chr5	140609464	140609765	exon	Lfng	7.56738	9.33984	14.9367	7.35397	-0.23453	-0.79404	0.03099	-0.55952	0.26552	0.82504
chr19	16495319	16495328	-	chr19	16494664	16495756	NA	NA	5.21032	8.03816	10.3523	4.77098	-0.45209	-0.73915	0.08494	-0.28706	0.53703	0.82409
chr1	97753409	97753418	-	chr1	97753002	97754015	CDS	Ppip5k2	2.93212	4.34949	6.05214	2.34514	-0.33594	-0.65734	0.16583	-0.3214	0.50177	0.82317
chr17	24199489	24199498	-	chr17	24199329	24199849	5UTR	Tbc1d24	10.8589	16.1579	12.884	6.25804	-0.4828	-0.204	0.61062	0.2788	1.09342	0.81462
chr10	95416903	95416912	+	chr10	95416240	95417733	transcript	Socs2	3.14529	17.073	17.5205	8.93862	-1.79856	-1.83121	-1.02222	-0.03265	0.77634	0.80899
chr10	95416914	95416923	+	chr10	95416240	95417733	transcript	Socs2	3.8337	17.3261	17.5205	8.93862	-1.65038	-1.66447	-0.85548	-0.01409	0.7949	0.80899
chr2	49177239	49177248	-	chr2	49176762	49177754	5UTR	Mbd5	2.45652	4.40222	5.17678	1.90224	-0.47991	-0.63391	0.17206	-0.154	0.65197	0.80597
chr4	134842194	134842203	-	chr4	134841915	134842489	NA	NA	1.02823	4.91012	4.71283	1.64595	-1.07623	-1.03716	-0.23438	0.03907	0.84186	0.80278
chr8	69127234	69127243	-	chr8	69126955	69127708	3UTR	Lzts1	7.70142	24.8155	20.3921	10.6599	-1.42329	-1.16815	-0.36822	0.25514	1.05507	0.79993
chr1	84861052	84861061	-	chr1	84860236	84861552	NA	NA	3.97726	14.3976	14.216	7.11536	-1.38699	-1.37138	-0.57188	0.01561	0.81511	0.7995
chr13	58477643	58477652	+	chr13	58477296	58477839	transcript	Gm40966	1.87629	3.91039	3.50754	0.97802	-0.55348	-0.45944	0.3337	0.09404	0.88718	0.79314
chr13	19210030	19210039	+	chr13	19209577	19210523	start_codon	Trgj1	0.82598	4.69724	4.73148	1.68563	-1.11985	-1.12673	-0.33403	-0.00687	0.78582	0.79269
chr6	31612941	31612950	-	chr6	31612675	31614539	exon	Gm31486	9.19601	25.6801	21.857	11.6052	-1.27056	-1.06001	-0.27076	0.21055	0.9998	0.78925
chr15	76546021	76546030	+	chr15	76545690	76546069	3UTR	Slc52a2	1.11103	6.37655	5.84863	2.35097	-1.30387	-1.21514	-0.42857	0.08873	0.8753	0.78657
chr1	97753398	97753407	+	chr1	97753002	97754015	CDS	Ppip5k2	2.93212	4.34949	4.86445	1.78894	-0.33594	-0.44091	0.34277	-0.10497	0.67871	0.78368
chr3	58454565	58454574	+	chr3	58454137	58455053	transcript	Tsc22d2	4.89084	10.6673	8.53123	3.92616	-0.83541	-0.57949	0.20256	0.25592	1.03797	0.78204
chr5	142932174	142932183	-	chr5	142931757	142932675	NA	NA	8.81864	12.6512	20.0587	10.6347	-0.42158	-0.99666	-0.21514	-0.57508	0.20644	0.78152
chr10	66994902	66994911	-	chr10	66994324	66996116	NA	NA	0.78156	3.81163	5.55674	2.19836	-0.94923	-1.30273	-0.5213	-0.35349	0.42794	0.78143
chr1	86245521	86245530	+	chr1	86245180	86246052	exon	Gm46098	14.7528	46.1464	39.2244	21.7873	-1.49693	-1.27536	-0.49401	0.22157	1.00292	0.78135
chr1	86611100	86611109	-	chr1	86610875	86611542	transcript	Cops7b	4.87257	7.03918	10.7886	5.26424	-0.37287	-0.85226	-0.07494	-0.47938	0.29794	0.77732
chr11	93914640	93914649	+	chr11	93914281	93915272	transcript	Mbtd1	1.35983	3.08455	3.02598	0.74861	-0.53597	-0.52068	0.25058	0.01528	0.78655	0.77127
chr3	9455199	9455208	-	chr3	9454218	9455602	NA	NA	4.56482	6.08099	7.0271	3.096	-0.28145	-0.43278	0.33768	-0.15133	0.61912	0.77046
chr12	101934802	101934811	-	chr12	101934446	101935194	CDS	Atxn3	2.01463	2.98447	4.32117	1.51381	-0.28224	-0.59828	0.17069	-0.31603	0.45294	0.76897
chr12	108958680	108958689	-	chr12	108957992	108959382	transcript	Wdr25	1.80147	7.38113	5.64016	2.29017	-1.20486	-0.92442	-0.15615	0.28044	1.04871	0.76826
chr5	53636992	53637001	-	chr5	53636596	53637824	CDS	Rbpj	2.40807	5.43722	6.35894	2.71244	-0.69645	-0.85545	-0.08726	-0.159	0.60919	0.76819
chr6	108880609	108880618	+	chr6	108880272	108881407	CDS	Gm6749	1.50166	3.72353	7.48746	3.38375	-0.64055	-1.32524	-0.5592	-0.6847	0.08135	0.76605
chr17	33607346	33607355	+	chr17	33606352	33607853	CDS	Myo1f	8.54583	7.56069	12.7599	6.49033	0.13511	-0.4672	0.29785	-0.60231	0.16273	0.76504
chrX	20787457	20787466	+	chrX	20787324	20788332	transcript	Gm39500	2.74797	3.52771	4.87415	1.8625	-0.20079	-0.49282	0.26808	-0.29202	0.46888	0.7609
chr15	82230241	82230250	+	chr15	82229652	82230678	3UTR	Cenpm	3.12413	2.15121	4.33102	1.54796	0.27545	-0.28167	0.47708	-0.55712	0.20164	0.75876
chr9	71480629	71480638	+	chr9	71480296	71481013	CDS	Polr2m	6.38017	9.05578	6.85377	3.04636	-0.38095	-0.07518	0.68163	0.30577	1.06258	0.75681
chr8	110793171	110793180	+	chr8	110792810	110793508	NA	NA	2.22833	3.30917	9.18536	4.42896	-0.29851	-1.31011	-0.55388	-1.0116	-0.25537	0.75623
chr12	108958701	108958710	-	chr12	108957992	108959382	transcript	Wdr25	1.43974	7.38113	5.57022	2.29017	-1.33241	-1.03948	-0.2837	0.29293	1.04871	0.75577
chr8	13265686	13265695	+	chr8	13265077	13266089	CDS	Dcun1d2	1.65931	2.56966	3.36372	0.98829	-0.2872	-0.49815	0.2556	-0.21095	0.54279	0.75374
chr10	93227910	93227919	-	chr10	93227729	93228441	CDS	Cdk17	2.60691	2.32719	7.95794	3.71369	0.0817	-1.0379	-0.28433	-1.1196	-0.36603	0.75357
chr2	105390825	105390834	-	chr2	105390385	105391369	CDS	Rcn1	6.33273	7.49466	8.51726	4.04668	-0.1788	-0.31969	0.43361	-0.14089	0.61241	0.7533
chr11	95748351	95748360	+	chr11	95748121	95748818	5UTR	Zfp652	3.56723	10.8223	7.53973	3.47169	-1.13816	-0.7291	0.023	0.40906	1.16116	0.7521
chr11	116307562	116307571	-	chr11	116307161	116308561	exon	Gm26730	6.72411	14.4685	9.89489	4.8704	-0.88127	-0.42732	0.32471	0.45395	1.20598	0.75203
chr19	41311058	41311067	-	chr19	41310856	41311612	NA	NA	5.07072	16.1849	25.7712	14.3382	-1.30637	-1.90452	-1.15601	-0.59815	0.15036	0.74851
chr13	23426737	23426746	-	chr13	23426464	23427227	exon	n-TYgta5	4.63943	11.7159	11.6743	5.96057	-0.99629	-0.99205	-0.24578	0.00424	0.75051	0.74627
chr2	119351025	119351034	-	chr2	119350662	119351893	5UTR	Chac1	12.6872	35.7602	27.141	15.188	-1.3345	-0.96596	-0.22027	0.36854	1.11423	0.74569
chr13	23270342	23270351	+	chr13	23270197	23270954	transcript	n-TIaat15	1.56362	8.42705	6.40125	2.85045	-1.43297	-1.13636	-0.39916	0.29662	1.03381	0.7372
chr8	61060622	61060631	+	chr8	61060074	61060890	CDS	Nek1	2.65522	5.12119	8.40509	4.0569	-0.56638	-1.0848	-0.34857	-0.51842	0.21782	0.73624
chr13	35994184	35994193	-	chr13	35993988	35994517	exon	Tmed10-ps	2.51645	5.2497	7.51563	3.54737	-0.63016	-1.00132	-0.27094	-0.37116	0.35922	0.73038
chr19	4846024	4846033	+	chr19	4845370	4846304	exon	Ccdc87	4.03153	6.58861	6.75156	3.09642	-0.47828	-0.50399	0.22389	-0.02571	0.70218	0.72789
chr10	28485241	28485250	+	chr10	28485138	28486057	CDS	Ptprk	1.54201	1.94808	3.51574	1.15879	-0.13897	-0.57677	0.1447	-0.4378	0.28367	0.72147
chrX	57373746	57373755	-	chrX	57373361	57374080	exon	Rbmx	4.29174	9.24376	15.4876	8.42864	-0.79241	-1.40864	-0.68839	-0.61623	0.10402	0.72025
chr19	35170724	35170733	-	chr19	35170449	35171088	NA	NA	7.52775	15.8243	13.3652	7.16514	-0.87148	-0.66327	0.05328	0.20821	0.92476	0.71655
chr15	78896262	78896271	-	chr15	78895756	78897295	transcript	Gga1	5.81727	7.45142	11.4994	6.05531	-0.25955	-0.75305	-0.04084	-0.4935	0.21871	0.71221
chr5	3478059	3478068	-	chr5	3477488	3478502	CDS	Cdk6	3.04101	4.84868	8.54428	4.25995	-0.40903	-0.99851	-0.28811	-0.58948	0.12093	0.71041
chr13	100464032	100464041	+	chr13	100463410	100464169	3UTR	Gtf2h2	1.76805	3.47932	8.83192	4.45249	-0.48897	-1.41432	-0.70741	-0.92536	-0.21844	0.70691
chr10	42191773	42191782	+	chr10	42191595	42192138	3UTR	Foxo3	2.85481	2.86437	3.74974	1.35148	-0.00259	-0.22398	0.47821	-0.2214	0.4808	0.7022
chr19	17410757	17410766	+	chr19	17410488	17411585	transcript	Rfk	1.77645	8.63638	4.31193	1.7008	-1.3863	-0.67498	0.02591	0.71132	1.41221	0.70089
chr19	41907548	41907557	-	chr19	41906050	41907749	transcript	Gm46644	6.128	9.78347	11.4277	6.07998	-0.51094	-0.69254	0.00808	-0.1816	0.51901	0.70062
chr11	77491648	77491657	+	chr11	77491096	77492022	NA	NA	11.9524	15.9752	19.6624	11.1597	-0.35485	-0.61772	0.08154	-0.26287	0.4364	0.69926
chr3	58454605	58454614	-	chr3	58454137	58455053	transcript	Tsc22d2	9.25273	17.8754	14.7364	8.14246	-0.7952	-0.55349	0.1435	0.24171	0.93871	0.697
chr17	81304868	81304877	-	chr17	81304351	81305420	transcript	Gm33944	0.66386	3.38769	4.24018	1.66939	-0.90162	-1.09752	-0.40107	-0.19591	0.50054	0.69645
chr6	129230449	129230458	-	chr6	129229487	129230795	transcript	Gm38906	6.46284	11.9572	14.982	8.30903	-0.69138	-0.96592	-0.27094	-0.27454	0.42044	0.69498
chr5	118480070	118480079	+	chr5	118479964	118480497	NA	NA	39.5901	24.2745	35.011	20.702	0.65314	0.16628	0.85997	-0.48686	0.20683	0.69369
chr19	24439897	24439906	+	chr19	24439479	24440277	CDS	Pip5k1b	8.86449	14.6085	19.0803	10.8544	-0.5913	-0.92677	-0.23328	-0.33546	0.35802	0.69349
chr14	62555293	62555302	-	chr14	62554875	62556418	5UTR	Fam124a	6.90128	13.6456	9.85425	5.15505	-0.7819	-0.39505	0.29737	0.38686	1.07928	0.69242
chr9	107296763	107296772	-	chr9	107295488	107297156	5UTR	Cish	20.6552	34.2862	49.7593	29.9011	-0.66844	-1.17527	-0.48518	-0.50683	0.18326	0.69009
chr11	62556120	62556129	-	chr11	62554047	62556432	transcript	Ubb	3.68912	3.85353	4.99997	2.16278	-0.03798	-0.27823	0.41057	-0.24025	0.44855	0.6888
chr5	24492590	24492599	-	chr5	24491942	24493256	CDS	Agap3	3.56019	9.67127	11.5345	6.2199	-1.00921	-1.21512	-0.52687	-0.20591	0.48234	0.68825
chr9	107296780	107296789	-	chr9	107295488	107297156	5UTR	Cish	20.6552	34.2862	49.7593	30.0338	-0.66844	-1.17527	-0.49108	-0.50683	0.17736	0.68419
chrX	8042858	8042867	-	chrX	8042287	8043276	exon	Gm9429	2.90856	2.87498	3.56026	1.28491	0.00903	-0.1649	0.51802	-0.17392	0.50899	0.68292
chr6	52629296	52629305	-	chr6	52628948	52629700	CDS	Hibadh	3.41059	4.71463	7.15924	3.52882	-0.28879	-0.71111	-0.0287	-0.42232	0.26009	0.68241
chr11	95748318	95748327	-	chr11	95748121	95748818	5UTR	Zfp652	3.18745	8.3439	7.2469	3.59599	-0.93422	-0.77996	-0.10053	0.15426	0.83369	0.67943
chr3	96679623	96679632	+	chr3	96679123	96679738	CDS	Ankrd35	7.44035	8.03395	8.32188	4.26813	-0.08389	-0.1229	0.55634	-0.039	0.64023	0.67923
chr13	111684586	111684595	+	chr13	111684054	111684929	NA	NA	8.17183	18.06	21.4469	12.486	-0.94775	-1.16801	-0.49083	-0.22026	0.45692	0.67718
chr4	89500431	89500440	-	chr4	89500103	89500636	NA	NA	5.43342	10.7316	8.65366	4.48835	-0.73989	-0.49289	0.18364	0.247	0.92353	0.67653
chr16	93197581	93197590	-	chr16	93196710	93198327	NA	NA	7.14318	15.0484	12.6913	7.02746	-0.86554	-0.65711	0.01747	0.20843	0.883	0.67458
chr1	127291446	127291455	-	chr1	127291274	127292314	exon	Gm51747	1.80278	2.08894	3.00506	0.95985	-0.09345	-0.35743	0.31673	-0.26398	0.41018	0.67416
chr6	31538107	31538116	-	chr6	31537146	31538465	transcript	Podxl	2.49123	5.91276	5.28889	2.39349	-0.7563	-0.64477	0.02868	0.11152	0.78498	0.67346
chr7	46676045	46676054	-	chr7	46675741	46676453	NA	NA	4.78452	13.7629	8.37374	4.33211	-1.16157	-0.57967	0.09285	0.58189	1.25442	0.67252
chr10	66995196	66995205	-	chr10	66994324	66996116	NA	NA	1.27407	1.56661	2.90138	0.90229	-0.10844	-0.52026	0.15072	-0.41183	0.25916	0.67099
chr1	84861125	84861134	+	chr1	84860236	84861552	NA	NA	4.65571	10.5247	12.2838	6.81601	-0.86649	-1.0496	-0.38185	-0.18311	0.48463	0.66775
chr16	57156004	57156013	-	chr16	57155524	57156347	3UTR	Nit2	9.56755	11.1871	11.355	6.25591	-0.18206	-0.19968	0.464	-0.01762	0.64606	0.66368
chr6	83312629	83312638	-	chr6	83312516	83312899	CDS	Mthfd2	3.76798	18.268	10.5925	5.80936	-1.73254	-1.06584	-0.40823	0.6667	1.32431	0.65761
chr16	8823796	8823805	-	chr16	8823105	8824158	NA	NA	2.94741	4.13356	4.56143	1.98644	-0.28547	-0.37599	0.2815	-0.09053	0.56697	0.6575
chr4	120665341	120665350	+	chr4	120664918	120665540	transcript	Gm29891	11.4273	32.4622	30.3344	18.3447	-1.32952	-1.23887	-0.58267	0.09066	0.74686	0.6562
chr3	27314590	27314599	+	chr3	27314295	27315187	NA	NA	4.95114	8.10598	12.8513	7.2549	-0.51087	-1.04547	-0.38988	-0.5346	0.12099	0.65559
chr10	28485184	28485193	-	chr10	28485138	28486057	CDS	Ptprk	0.87374	1.30159	3.52226	1.33608	-0.17353	-0.84095	-0.18665	-0.66741	-0.01312	0.65429
chr1	106612837	106612846	-	chr1	106612299	106613257	transcript	Gm37053	0.63679	0.9015	2.53851	0.71917	-0.11783	-0.68832	-0.03771	-0.57048	0.08012	0.65061
chr9	64564437	64564446	-	chr9	64564081	64565610	transcript	Megf11	4.77852	13.2406	13.2869	7.57014	-1.11559	-1.11984	-0.46982	-0.00425	0.64577	0.65002
chr8	84877840	84877849	-	chr8	84877457	84878095	5UTR	Syce2	6.81515	13.8497	17.3222	10.1896	-0.81337	-1.09163	-0.44708	-0.27826	0.36629	0.64455
chr7	132776927	132776936	-	chr7	132776814	132777028	transcript	Fam53b	11.2746	13.6871	19.7905	11.78	-0.23325	-0.69548	-0.05209	-0.46223	0.18116	0.64339
chr7	97210404	97210413	+	chr7	97208619	97210646	NA	NA	3.55488	12.7097	7.91374	4.18087	-1.33262	-0.78496	-0.14253	0.54766	1.19009	0.64243
chr8	91269773	91269782	+	chr8	91269428	91270111	CDS	Rpgrip1l	4.35494	3.90793	6.14671	3.0615	0.09767	-0.33616	0.30297	-0.43384	0.20529	0.63913
chr17	31073988	31073997	+	chr17	31073198	31074095	CDS	Abcg1	3.06381	4.32125	5.92999	2.92395	-0.29523	-0.60179	0.03691	-0.30656	0.33214	0.6387
chr8	84877819	84877828	-	chr8	84877457	84878095	5UTR	Syce2	6.81515	14.1247	17.3222	10.2544	-0.83747	-1.09163	-0.45445	-0.25416	0.38302	0.63718
chr15	102177540	102177549	+	chr15	102177450	102178066	stop_codon	Csad	2.8393	2.33485	4.29275	1.87802	0.14393	-0.34888	0.28795	-0.4928	0.14402	0.63682
chr3	9403350	9403359	+	chr3	9402850	9404067	exon	C030034L19Rik	19.2242	22.3755	20.2332	12.1363	-0.19564	-0.06557	0.5706	0.13007	0.76624	0.63617
chr6	35244202	35244211	+	chr6	35243882	35244368	CDS	Nup205	4.60095	6.08663	7.01229	3.64973	-0.27501	-0.42314	0.20832	-0.14813	0.48333	0.63146
chr15	76545892	76545901	-	chr15	76545690	76546069	3UTR	Slc52a2	2.90406	6.48527	6.14089	3.08811	-0.73634	-0.67978	-0.04855	0.05655	0.68779	0.63123
chr7	66233255	66233264	+	chr7	66233046	66233969	NA	NA	23.7209	72.0713	56.0143	35.3175	-1.50884	-1.15887	-0.52878	0.34997	0.98006	0.63009
chr4	107221470	107221479	+	chr4	107221311	107221922	transcript	Ldlrad1	24.2451	12.3504	15.5137	9.1633	0.84991	0.57087	1.19914	-0.27904	0.34923	0.62827
chr9	72563528	72563537	-	chr9	72562956	72563859	NA	NA	6.60901	7.77041	11.2686	6.42189	-0.1736	-0.59743	0.03003	-0.42383	0.20363	0.62746
chr12	111266880	111266889	+	chr12	111266215	111267007	transcript	Traf3	24.9334	14.8302	19.6035	11.8234	0.66345	0.31199	0.93883	-0.35146	0.27538	0.62684
chr10	83027884	83027893	-	chr10	83027561	83028122	NA	NA	10.2364	8.54397	10.6876	6.06057	0.20616	-0.05033	0.57464	-0.25649	0.36848	0.62497
chr9	109871187	109871196	+	chr9	109871143	109871511	transcript	Gm39427	4.60762	6.49895	9.66653	5.39906	-0.34152	-0.77771	-0.15285	-0.43619	0.18867	0.62486
chr10	7748873	7748882	+	chr10	7748758	7749223	5UTR	Katna1	2.15686	5.00951	3.80084	1.61412	-0.69248	-0.43833	0.17986	0.25415	0.87234	0.61819
chr14	56702836	56702845	-	chr14	56702447	56704060	transcript	Mphosph8	16.8845	31.5742	24.6413	15.2358	-0.81462	-0.48615	0.12842	0.32847	0.94304	0.61457
chr16	31940761	31940770	-	chr16	31940555	31941185	transcript	Pigz	6.03473	16.1023	18.0125	10.9148	-1.12649	-1.26769	-0.65403	-0.14121	0.47245	0.61366
chr7	144740074	144740083	-	chr7	144739111	144740186	CDS	Ano1	2.25332	5.88685	4.72355	2.23447	-0.82268	-0.60652	0.00576	0.21615	0.82844	0.61229
chr18	80603409	80603418	-	chr18	80602911	80603650	exon	Gm41790	1.24356	7.79269	6.17799	3.18768	-1.46564	-1.21876	-0.60692	0.24688	0.85871	0.61183
chr10	93708359	93708368	-	chr10	93708083	93709299	CDS	Ntn4	3.23779	7.90946	7.59999	4.11849	-0.86232	-0.81866	-0.20689	0.04365	0.65542	0.61177
chr13	8965476	8965485	-	chr13	8965246	8965677	transcript	Idi2	2.94956	11.244	14.7682	8.82215	-1.33882	-1.6687	-1.05857	-0.32988	0.28025	0.61013
chr8	33684583	33684592	-	chr8	33684449	33684788	CDS	Gsr	2.85467	6.33496	5.54576	2.79029	-0.72524	-0.58982	0.01754	0.13542	0.74277	0.60736
chr11	11570400	11570409	+	chr11	11569311	11571665	transcript	Gm11998	3.74116	2.69009	5.07407	2.48309	0.2673	-0.28033	0.32632	-0.54763	0.05903	0.60665
chr7	45486303	45486312	-	chr7	45486133	45486556	5UTR	Tulp2	15.4104	19.5935	29.6982	18.6643	-0.30323	-0.84713	-0.24116	-0.5439	0.06207	0.60597
chr9	46065745	46065754	-	chr9	46065696	46066083	NA	NA	3.0869	4.69676	4.07984	1.83914	-0.36683	-0.23704	0.36661	0.12979	0.73344	0.60364
chr1	73038873	73038882	+	chr1	73038210	73039149	NA	NA	4.3856	4.18408	5.56948	2.82608	0.04302	-0.22971	0.37213	-0.27273	0.32911	0.60184
chr6	83316250	83316259	+	chr6	83316011	83316330	transcript	Mthfd2	9.60013	14.468	10.4512	6.05726	-0.4887	-0.09828	0.50111	0.39042	0.9898	0.59938
chr14	40989066	40989075	-	chr14	40988632	40989329	3UTR	Prxl2a	16.5719	27.9428	26.5242	16.6692	-0.6754	-0.6065	-0.00736	0.0689	0.66804	0.59914
chr4	120683585	120683594	+	chr4	120683008	120684114	NA	NA	5.06519	6.43787	7.36183	4.02541	-0.24133	-0.38365	0.21411	-0.14232	0.45544	0.59777
chr8	36319752	36319761	+	chr8	36318998	36320813	transcript	Gm35712	3.46725	4.95487	7.15647	3.8918	-0.32239	-0.69687	-0.09958	-0.37448	0.22281	0.59729
chr12	105757998	105758007	+	chr12	105757862	105758395	transcript	Ak7	5.96578	6.29309	8.03806	4.47735	-0.0549	-0.31678	0.27993	-0.26189	0.33482	0.59671
chr4	120683913	120683922	+	chr4	120683008	120684114	NA	NA	3.76068	5.61959	7.0272	3.82262	-0.37648	-0.60782	-0.01426	-0.23134	0.36222	0.59356
chr19	55578424	55578433	+	chr19	55578147	55579076	3UTR	Vti1a	1.75214	2.28176	2.917	1.09898	-0.17035	-0.35124	0.24224	-0.18089	0.41259	0.59348
chr1	160812110	160812119	+	chr1	160811640	160812841	transcript	Gm37083	7.87315	10.469	8.40117	4.7347	-0.32295	-0.07181	0.52145	0.25115	0.8444	0.59325
chr13	111905433	111905442	+	chr13	111904819	111905963	NA	NA	11.9905	17.8531	26.0315	16.4243	-0.4909	-0.97874	-0.38575	-0.48784	0.10515	0.59299
chr16	10725311	10725320	-	chr16	10724998	10725683	NA	NA	3.79062	5.40368	8.70243	4.94658	-0.33056	-0.8352	-0.24432	-0.50464	0.08624	0.59088
chr10	93488017	93488026	+	chr10	93487585	93488375	5UTR	Hal	1.07277	6.65987	3.85572	1.73079	-1.36481	-0.8357	-0.24555	0.52911	1.11926	0.59015
chr1	151202909	151202918	+	chr1	151202374	151203220	NA	NA	28.7796	33.7315	31.8503	20.3782	-0.21219	-0.13521	0.4517	0.07698	0.66388	0.58691
chr6	31592478	31592487	-	chr6	31592084	31593266	NA	NA	3.93575	9.1379	8.79065	5.02729	-0.8573	-0.8135	-0.22688	0.0438	0.63042	0.58662
chr13	109693034	109693043	-	chr13	109692790	109693252	exon	Pde4d	6.55697	6.6004	6.78194	3.68985	-0.00692	-0.0355	0.55108	-0.02858	0.558	0.58658
chr6	31538268	31538277	-	chr6	31537146	31538465	transcript	Podxl	3.73013	7.28504	9.2155	5.32011	-0.65354	-0.91395	-0.32917	-0.26041	0.32437	0.58478
chr4	32291659	32291668	+	chr4	32291371	32292050	transcript	Bach2	5.42887	6.09472	14.4743	8.85953	-0.11671	-1.10073	-0.52017	-0.98402	-0.40346	0.58056
chr11	119124104	119124113	-	chr11	119123963	119124291	exon	Gm11755	3.84551	5.98517	8.02527	4.54794	-0.42073	-0.73244	-0.15207	-0.31171	0.26866	0.58037
chr2	153292715	153292724	-	chr2	153291077	153292980	exon	Kif3b	8.65131	15.2235	14.0865	8.60355	-0.66972	-0.57392	0.00621	0.0958	0.67593	0.58013
chr6	124683821	124683830	+	chr6	124683401	124684119	transcript	Lpcat3	35.6667	51.6423	55.1037	36.0483	-0.50473	-0.59418	-0.01436	-0.08945	0.49038	0.57982
chr15	63731176	63731185	+	chr15	63730200	63731628	transcript	4930449C09Rik	23.2626	23.3825	22.9304	14.5296	-0.00671	0.01875	0.598	0.02545	0.6047	0.57925
chr8	70036949	70036958	+	chr8	70036812	70037151	CDS	Mau2	3.98786	4.76009	6.5651	3.58391	-0.16287	-0.48425	0.09313	-0.32138	0.25601	0.57739
chr7	28596907	28596916	+	chr7	28596264	28597693	5UTR	Pak4	11.7785	11.5481	19.6811	12.4251	0.02351	-0.63644	-0.064	-0.65995	-0.08752	0.57243
chr2	180249122	180249131	+	chr2	180248920	180249617	3UTR	Cables2	2.1561	5.33207	6.36142	3.46978	-0.7536	-0.93231	-0.36036	-0.17871	0.39324	0.57195
chr15	57951662	57951671	+	chr15	57951413	57952403	CDS	Tbc1d31	6.48632	10.4103	10.0706	5.98045	-0.52401	-0.48546	0.08384	0.03855	0.60785	0.56931
chr2	49177199	49177208	-	chr2	49176762	49177754	5UTR	Mbd5	2.34368	4.2715	4.16724	2.00217	-0.48562	-0.46314	0.10608	0.02247	0.5917	0.56923
chr2	156924486	156924495	+	chr2	156924110	156925324	3UTR	Ndrg3	5.64262	6.08942	12.4347	7.58248	-0.07731	-0.87723	-0.30919	-0.79992	-0.23188	0.56805
chr4	132861135	132861144	-	chr4	132860537	132861509	CDS	Stx12	1.85213	4.69235	5.2695	2.77803	-0.72821	-0.83996	-0.27982	-0.11175	0.44839	0.56014
chr17	46854710	46854719	-	chr17	46854552	46854855	5UTR	Bicral	9.15262	12.748	10.6578	6.44129	-0.38874	-0.17564	0.38309	0.2131	0.77183	0.55873
chr3	96458621	96458630	+	chr3	96457900	96458669	exon	Gm10685	3.59031	7.91898	5.55519	2.9806	-0.77723	-0.40493	0.15288	0.3723	0.93011	0.55781
chr7	117399934	117399943	-	chr7	117399678	117400340	NA	NA	3.72276	6.54986	6.15078	3.38897	-0.54226	-0.477	0.07989	0.06526	0.62215	0.55689
chr6	48061074	48061083	+	chr6	48060626	48061722	3UTR	Zfp746	9.95719	16.2575	20.019	12.8268	-0.59152	-0.85553	-0.29965	-0.26402	0.29187	0.55588
chr13	45547015	45547024	-	chr13	45546621	45547965	transcript	Gmpr	2.80005	5.14835	6.43489	3.58967	-0.53136	-0.75638	-0.20129	-0.22502	0.33006	0.55508
chr7	126039900	126039909	-	chr7	126039188	126039959	NA	NA	6.01898	8.19507	10.8615	6.60819	-0.3291	-0.65095	-0.09677	-0.32184	0.23233	0.55418
chr19	41445925	41445934	+	chr19	41445715	41446465	NA	NA	1.39983	2.9739	3.37326	1.50848	-0.49198	-0.59405	-0.03991	-0.10207	0.45207	0.55414
chr6	86219582	86219591	+	chr6	86219351	86219984	NA	NA	4.75526	3.06058	5.43155	2.91577	0.3854	-0.12902	0.42365	-0.51442	0.03825	0.55267
chr8	13265614	13265623	-	chr8	13265077	13266089	CDS	Dcun1d2	2.22539	2.54424	4.27667	2.1289	-0.09472	-0.52259	0.02993	-0.42788	0.12465	0.55252
chr1	55092567	55092576	-	chr1	55092423	55093064	transcript	Hspe1	8.47543	24.2392	31.1093	20.4998	-1.28673	-1.61692	-1.06916	-0.33019	0.21757	0.54776
chr16	58532293	58532302	+	chr16	58532280	58532839	NA	NA	1.95177	1.31334	2.42309	0.87809	0.22476	-0.14601	0.40091	-0.37077	0.17614	0.54691
chr1	161040541	161040550	+	chr1	161039012	161041439	3UTR	Dars2	8.0148	17.4915	26.7443	17.5457	-0.92868	-1.47806	-0.9326	-0.54937	-0.00392	0.54546
chr1	136007333	136007342	+	chr1	136007202	136008598	5UTR	Tmem9	4.70649	3.58083	6.71316	3.83961	0.24601	-0.35555	0.18563	-0.60156	-0.06038	0.54118
chr4	89503627	89503636	-	chr4	89503407	89504343	NA	NA	3.61353	2.73441	4.63748	2.41341	0.22503	-0.22431	0.31681	-0.44933	0.09178	0.54111
chr13	23556032	23556041	+	chr13	23554887	23556610	CDS	H1f3	38.5822	41.5573	53.28	35.9001	-0.10093	-0.44148	0.09747	-0.34055	0.1984	0.53895
chr17	45973342	45973351	+	chr17	45972990	45974227	NA	NA	2.75665	9.82852	11.2334	6.98535	-1.23395	-1.38996	-0.8548	-0.15601	0.37915	0.53516
chr11	48797530	48797539	-	chr11	48797290	48797850	exon	Gm36109	13.1211	12.1363	9.50105	5.8104	0.09411	0.38107	0.91265	0.28696	0.81854	0.53158
chr1	194839758	194839767	+	chr1	194839257	194839944	NA	NA	6.77343	8.81161	7.98633	4.78741	-0.28737	-0.17781	0.34882	0.10956	0.63619	0.52663
chr1	179076416	179076425	+	chr1	179075899	179077100	transcript	Smyd3	2.21791	2.14732	4.08607	2.08076	0.02187	-0.48357	0.0428	-0.50544	0.02093	0.52637
chr3	51560928	51560937	+	chr3	51559598	51561913	exon	5031434O11Rik	23.7839	29.7571	45.9052	31.1539	-0.29571	-0.88165	-0.35691	-0.58594	-0.0612	0.52473
chr13	37885647	37885656	-	chr13	37885030	37886386	transcript	Rreb1	14.6493	18.9413	22.9524	15.2109	-0.32268	-0.57038	-0.04656	-0.24769	0.27613	0.52382
chrX	8043170	8043179	-	chrX	8042287	8043276	exon	Gm9429	1.6042	2.97359	3.5549	1.72005	-0.41772	-0.56401	-0.04042	-0.14629	0.3773	0.52359
chr9	76236379	76236388	-	chr9	76235958	76237859	CDS	Hcrtr2	5.45021	6.33175	5.11686	2.80885	-0.15219	0.06201	0.58498	0.21419	0.73717	0.52298
chr4	124606053	124606062	-	chr4	124605909	124606932	NA	NA	2.20064	2.59339	4.08735	2.10293	-0.1164	-0.48917	0.03048	-0.37277	0.14687	0.51965
chr4	120614072	120614081	+	chr4	120613514	120614533	transcript	Gm8439	5.58408	4.2007	5.71979	3.25568	0.27175	-0.0241	0.49201	-0.29584	0.22026	0.5161
chr2	72813463	72813472	+	chr2	72812779	72813852	exon	6430710C18Rik	8.97683	12.6508	9.80459	6.11252	-0.40148	-0.1007	0.41532	0.30078	0.8168	0.51602
chr15	63731093	63731102	+	chr15	63730200	63731628	transcript	4930449C09Rik	20.231	19.7263	24.5123	16.4002	0.03243	-0.24922	0.2666	-0.28165	0.23417	0.51582
chr15	102177938	102177947	-	chr15	102177450	102178066	stop_codon	Csad	0.94688	1.56612	2.19172	0.79134	-0.24005	-0.44777	0.06714	-0.20772	0.3072	0.51492
chr16	31940990	31940999	-	chr16	31940555	31941185	transcript	Pigz	11.7764	13.2829	11.0889	7.03045	-0.14498	0.07134	0.58435	0.21632	0.72933	0.51301
chr3	75544583	75544592	-	chr3	75544328	75544746	NA	NA	13.2859	16.9641	21.0395	14.0159	-0.30264	-0.57724	-0.06532	-0.2746	0.23732	0.51192
chr4	144999393	144999402	-	chr4	144998835	145000485	NA	NA	15.6418	26.3825	33.4145	22.7488	-0.67166	-0.98629	-0.47749	-0.31463	0.19417	0.5088
chr10	66995273	66995282	+	chr10	66994324	66996116	NA	NA	1.94828	2.30496	3.00148	1.3792	-0.11192	-0.30822	0.19875	-0.1963	0.31067	0.50697
chr16	43900028	43900037	+	chr16	43899822	43900673	CDS	Ccdc191	0.64949	1.69207	2.18186	0.80645	-0.41557	-0.57595	-0.07074	-0.16037	0.34483	0.5052
chr3	10203053	10203062	-	chr3	10202806	10203307	3UTR	Fabp4	2.58761	11.9539	6.62354	3.94481	-1.51127	-0.84593	-0.34273	0.66534	1.16853	0.5032
chr13	45547133	45547142	-	chr13	45546621	45547965	transcript	Gmpr	2.43219	6.41209	6.36514	3.77717	-0.857	-0.84935	-0.34955	0.00764	0.50745	0.49981
chr2	156898071	156898080	+	chr2	156898044	156898737	exon	Gm14248	2.55553	2.52116	3.92617	2.05385	0.00989	-0.34771	0.15161	-0.3576	0.14172	0.49932
chr3	88747138	88747147	-	chr3	88746646	88747371	exon	Syt11	3.53918	13.0008	7.05248	4.26558	-1.36377	-0.66385	-0.16454	0.69992	1.19923	0.49931
chr4	138368823	138368832	+	chr4	138367410	138369201	transcript	Cda	4.22312	14.5073	6.13631	3.61843	-1.34238	-0.36254	0.13653	0.97984	1.47892	0.49907
chr12	55859882	55859891	+	chr12	55859581	55860792	CDS	Brms1l	3.67743	5.72825	4.33737	2.34601	-0.41512	-0.14703	0.35191	0.26809	0.76703	0.49894
chr19	35164915	35164924	-	chr19	35163967	35165347	transcript	Gm31568	2.81661	9.74029	4.37771	2.37456	-1.20712	-0.37305	0.12589	0.83407	1.33301	0.49894
chr15	63730825	63730834	+	chr15	63730200	63731628	transcript	4930449C09Rik	7.31989	10.9686	13.7639	9.03	-0.45688	-0.72943	-0.23219	-0.27256	0.22469	0.49724
chr1	82374431	82374440	+	chr1	82373303	82374474	CDS	Rhbdd1	2.36272	3.0101	3.28014	1.60385	-0.18124	-0.25059	0.24624	-0.06935	0.42748	0.49683
chr17	56836403	56836412	+	chr17	56836302	56836697	3UTR	Acsbg2	5.5541	7.23886	7.04429	4.27582	-0.27485	-0.24565	0.25022	0.02919	0.52507	0.49588
chr1	160812092	160812101	-	chr1	160811640	160812841	transcript	Gm37083	5.05559	6.76623	7.68683	4.7347	-0.29537	-0.43239	0.06284	-0.13702	0.35821	0.49523
chr10	41196443	41196452	+	chr10	41195693	41197051	NA	NA	46.366	36.3926	42.1779	29.2172	0.32954	0.12934	0.62399	-0.20019	0.29445	0.49464
chr17	45973307	45973316	-	chr17	45972990	45974227	NA	NA	2.30514	5.94017	7.43973	4.567	-0.81612	-1.05274	-0.55907	-0.23662	0.25705	0.49367
chr9	56983416	56983425	-	chr9	56982967	56983938	transcript	Snupn	1.00677	4.85751	2.715	1.21967	-1.07479	-0.5761	-0.08566	0.49868	0.98913	0.49044
chr1	64812215	64812224	+	chr1	64811638	64812877	CDS	Plekhm3	3.91826	6.87963	6.71569	4.07727	-0.54923	-0.52372	-0.03545	0.02551	0.51378	0.48827
chr4	53246318	53246327	-	chr4	53245367	53246937	exon	4930522O17Rik	19.0969	29.1388	26.3125	18.0845	-0.55143	-0.41631	0.06935	0.13511	0.62078	0.48567
chr10	78246903	78246912	+	chr10	78246721	78247515	exon	Gm30122	2.27003	4.01728	5.40892	3.15618	-0.45242	-0.73266	-0.24709	-0.28024	0.20533	0.48558
chr15	94403468	94403477	-	chr15	94403006	94404851	CDS	Adamts20	2.61761	2.11754	3.5376	1.83221	0.14916	-0.23964	0.24172	-0.3888	0.09257	0.48137
chr4	40870332	40870341	-	chr4	40870051	40870845	NA	NA	1.89636	5.43166	3.9326	2.11765	-0.85519	-0.55185	-0.07127	0.30334	0.78392	0.48058
chr9	67877687	67877696	+	chr9	67877138	67878097	CDS	Vps13c	8.92703	11.4622	11.4844	7.5596	-0.28969	-0.29198	0.18433	-0.00229	0.47402	0.47631
chr8	94553187	94553196	+	chr8	94552653	94553681	CDS	Cpne2	1.78652	3.3907	3.72422	1.98372	-0.46106	-0.54086	-0.06528	-0.0798	0.39578	0.47558
chr2	4347971	4347980	-	chr2	4347523	4348302	NA	NA	6.35518	10.2955	13.3339	8.89779	-0.53237	-0.84032	-0.36512	-0.30796	0.16724	0.4752
chr6	52691323	52691332	-	chr6	52691097	52693290	exon	Gm52884	1.06055	2.14975	2.96069	1.4387	-0.38757	-0.62072	-0.14665	-0.23315	0.24092	0.47407
chr8	10991091	10991100	-	chr8	10990471	10991739	transcript	Irs2	3.67342	3.96576	7.75448	4.89312	-0.06703	-0.73457	-0.26113	-0.66754	-0.1941	0.47344
chrX	20787485	20787494	+	chrX	20787324	20788332	transcript	Gm39500	3.35519	4.83209	5.55249	3.30752	-0.32582	-0.4615	0.01185	-0.13568	0.33767	0.47335
chr4	46836184	46836193	-	chr4	46835839	46836661	NA	NA	3.2595	4.91566	2.93691	1.42434	-0.36611	0.08355	0.5566	0.44966	0.92271	0.47305
chr11	101605018	101605027	+	chr11	101604247	101605695	exon	Gm26316	29.8147	46.1159	42.4924	29.9423	-0.58963	-0.47782	-0.00569	0.11181	0.58394	0.47213
chr11	49877306	49877315	+	chr11	49876840	49877874	CDS	Mapk9	9.38679	10.8015	9.75452	6.35011	-0.16257	-0.04405	0.42669	0.11852	0.58926	0.47074
chr6	41177329	41177338	-	chr6	41177048	41177591	transcript	Trbv18	3.06256	6.59803	7.97246	5.06457	-0.71247	-0.916	-0.44533	-0.20352	0.26715	0.47067
chr1	36892757	36892766	+	chr1	36892374	36892931	NA	NA	0.55307	3.2647	4.26437	2.38969	-0.92289	-1.15458	-0.6842	-0.23169	0.23869	0.47038
chr2	154765333	154765342	-	chr2	154764851	154766073	transcript	Gm38598	7.28239	29.501	21.1301	14.6304	-1.71256	-1.27465	-0.80997	0.43791	0.90259	0.46468
chr8	10990509	10990518	+	chr8	10990471	10991739	transcript	Irs2	2.99106	7.51145	4.9393	2.90599	-0.86963	-0.4399	0.02264	0.42973	0.89227	0.46254
chr3	51375170	51375179	+	chr3	51375159	51376349	NA	NA	4.7344	8.35907	8.47896	5.49483	-0.58772	-0.6036	-0.1447	-0.01588	0.44302	0.4589
chr2	103017712	103017721	-	chr2	103017262	103018245	3UTR	Pdhx	11.4141	15.5103	11.727	7.85996	-0.37289	-0.03214	0.42647	0.34075	0.79937	0.45861
chr19	37464794	37464803	-	chr19	37464499	37465120	exon	1700122C19Rik	2.87771	4.73038	6.27129	3.89603	-0.4289	-0.70855	-0.25132	-0.27965	0.17758	0.45723
chr7	24450927	24450936	-	chr7	24450331	24451157	exon	Gm36159	1.84438	4.84319	8.36387	5.42034	-0.76085	-1.32759	-0.87039	-0.56674	-0.10953	0.45721
chr17	29499967	29499976	-	chr17	29499695	29501331	transcript	Pim1	4.14918	7.61077	6.94098	4.38521	-0.60661	-0.50746	-0.05052	0.09915	0.55609	0.45694
chr9	112182376	112182385	-	chr9	112182264	112183054	3UTR	Arpp21	2.82405	3.47796	3.38013	1.79573	-0.16791	-0.144	0.31134	0.02391	0.47926	0.45534
chr15	39957855	39957864	-	chr15	39957257	39958307	NA	NA	3.24605	5.93029	5.89327	3.64032	-0.55513	-0.54876	-0.09617	0.00637	0.45896	0.45259
chr17	28238005	28238014	+	chr17	28237852	28238604	5UTR	Ppard	13.1339	20.5207	11.5435	7.78625	-0.55904	0.15505	0.60523	0.71408	1.16426	0.45018
chr10	89443689	89443698	-	chr10	89442665	89444390	5UTR	Gas2l3	26.6696	20.8231	25.9966	18.3996	0.32304	0.03371	0.48151	-0.28933	0.15847	0.4478
chr6	91007346	91007355	-	chr6	91006927	91007951	3UTR	Nup210	31.1336	31.7587	34.4355	24.6606	-0.02659	-0.13521	0.30866	-0.10862	0.33524	0.44386
chr12	100392327	100392336	+	chr12	100391832	100392404	transcript	Ttc7b	1.05485	2.13725	3.02979	1.57558	-0.386	-0.64128	-0.19859	-0.25529	0.1874	0.44269
chr10	127755501	127755510	+	chr10	127753971	127755935	transcript	Zbtb39	2.19731	5.44751	3.93066	2.23874	-0.762	-0.45533	-0.01274	0.30667	0.74926	0.44259
chr19	53002386	53002395	-	chr19	53002100	53002662	CDS	Xpnpep1	24.3621	19.9708	27.1076	19.3336	0.2578	-0.14053	0.29935	-0.39833	0.04155	0.43988
chr14	99229710	99229719	+	chr14	99228449	99229905	exon	Pibf1	2.50483	2.62092	2.58318	1.25481	-0.03326	-0.02253	0.41713	0.01073	0.45038	0.43966
chr13	21881834	21881843	-	chr13	21881693	21883510	exon	n-TFgaa1	6.70275	11.8519	14.1802	9.81253	-0.6426	-0.85986	-0.42104	-0.21726	0.22156	0.43882
chr1	136103323	136103332	+	chr1	136102088	136103478	CDS	Cacna1s	2.29229	3.91319	4.8689	2.95069	-0.42234	-0.62352	-0.18669	-0.20118	0.23566	0.43684
chr10	127730609	127730618	-	chr10	127730222	127731426	3UTR	Tac2	59.1532	57.3638	42.5598	30.7993	0.04251	0.45256	0.88921	0.41005	0.8467	0.43665
chr16	10768938	10768947	-	chr16	10768797	10769185	NA	NA	4.0622	6.30367	9.10313	6.08978	-0.42541	-0.82479	-0.38982	-0.39938	0.03559	0.43497
chr12	16033337	16033346	-	chr12	16033053	16034167	NA	NA	0.60005	2.0439	2.55669	1.24826	-0.55557	-0.71068	-0.27607	-0.15512	0.2795	0.43462
chr3	157719384	157719393	-	chr3	157718788	157720144	NA	NA	4.14106	5.22558	3.56326	2.00369	-0.21904	0.13187	0.56304	0.35091	0.78208	0.43117
chr11	53655403	53655412	-	chr11	53655030	53655545	CDS	Rad50	17.5192	18.8379	19.5195	13.8824	-0.09215	-0.13757	0.28966	-0.04541	0.38181	0.42723
chr13	21241249	21241258	+	chr13	21240798	21241324	exon	n-TAtgc11	0.6312	2.97913	3.50332	1.97729	-0.81247	-0.9449	-0.51959	-0.13242	0.29288	0.42531
chr1	82748018	82748027	-	chr1	82747341	82748480	CDS	Mff	4.19395	3.8557	3.68127	2.11918	0.07511	0.11543	0.53779	0.04032	0.46268	0.42236
chr1	82825502	82825511	-	chr1	82824950	82825887	exon	Gm34450	4.8558	15.4993	8.94533	6.05499	-1.29406	-0.63966	-0.21861	0.6544	1.07545	0.42105
chr10	83027999	83028008	+	chr10	83027561	83028122	NA	NA	7.25287	5.29099	6.85911	4.49816	0.32501	0.05962	0.48039	-0.26539	0.15539	0.42077
chr4	106306594	106306603	-	chr4	106306298	106306875	NA	NA	4.04181	6.76051	6.65213	4.34553	-0.50312	-0.48608	-0.06573	0.01703	0.43738	0.42035
chr17	33499630	33499639	+	chr17	33498872	33499761	NA	NA	1.10265	2.78365	2.95837	1.5864	-0.55586	-0.60302	-0.18303	-0.04717	0.37283	0.41999
chr9	108035535	108035544	-	chr9	108035184	108036739	CDS	Ip6k1	8.64927	21.6808	29.4377	21.3852	-1.11876	-1.52054	-1.10099	-0.40178	0.01777	0.41955
chr11	94070747	94070756	+	chr11	94070258	94071323	exon	Gm38951	0.98938	0.95886	2.31392	1.10592	0.01277	-0.46726	-0.04775	-0.48003	-0.06052	0.41951
chr10	93708620	93708629	+	chr10	93708083	93709299	CDS	Ntn4	9.22635	8.06902	10.4868	7.23577	0.15027	-0.14761	0.26905	-0.29787	0.11878	0.41666
chr17	5830639	5830648	+	chr17	5829642	5831163	NA	NA	30.3984	40.1146	35.2718	25.8181	-0.37359	-0.19944	0.21648	0.17415	0.59007	0.41592
chr5	105859885	105859894	-	chr5	105858643	105859946	exon	Gm10359	0.60063	1.50221	2.57438	1.31566	-0.37102	-0.71548	-0.30169	-0.34446	0.06933	0.41379
chr2	152737093	152737102	-	chr2	152736045	152737107	CDS	Id1	5.91719	6.77331	6.50291	4.26643	-0.14016	-0.09735	0.31605	0.04282	0.45621	0.4134
chr3	84414199	84414208	+	chr3	84412392	84414619	NA	NA	7.92509	14.6996	7.4584	4.99551	-0.72376	0.06625	0.47739	0.79	1.20115	0.41115
chr8	3480656	3480665	+	chr8	3480286	3480954	transcript	Tex45	2.58243	2.28169	3.51702	2.0332	0.08847	-0.2447	0.1659	-0.33317	0.07743	0.4106
chr8	110941573	110941582	+	chr8	110941003	110941872	5UTR	St3gal2	6.84782	6.46039	9.52521	6.55881	0.06124	-0.36427	0.04544	-0.42551	-0.01581	0.40971
chr4	128669426	128669435	+	chr4	128668691	128669655	NA	NA	2.99624	10.3638	5.10402	3.23583	-1.23078	-0.47024	-0.06185	0.76054	1.16894	0.4084
chr6	113649228	113649237	-	chr6	113648822	113649811	CDS	Irak2	4.99655	11.1571	11.0002	7.67866	-0.86765	-0.85094	-0.44259	0.0167	0.42505	0.40835
chr12	16033679	16033688	+	chr12	16033053	16034167	NA	NA	0.44259	1.18106	2.18074	1.04526	-0.32565	-0.67449	-0.27102	-0.34884	0.05463	0.40347
chr12	111247375	111247384	+	chr12	111246657	111247506	CDS	Traf3	7.05321	5.3754	7.14326	4.79932	0.27948	-0.01357	0.38946	-0.29306	0.10997	0.40303
chr1	170845266	170845275	-	chr1	170845029	170846336	CDS	Atf6	3.12053	3.06593	4.19454	2.57233	0.01415	-0.25337	0.14879	-0.26752	0.13464	0.40216
chr15	82230034	82230043	-	chr15	82229652	82230678	3UTR	Cenpm	4.29747	5.8999	6.81186	4.55574	-0.30645	-0.45559	-0.05401	-0.14914	0.25244	0.40158
chrX	36715177	36715186	+	chrX	36714886	36716136	NA	NA	1.27918	2.40431	2.6117	1.37842	-0.3783	-0.43837	-0.03766	-0.06007	0.34065	0.40072
chr11	69599697	69599706	+	chr11	69599284	69599849	3UTR	Atp1b2	4.07045	8.1425	8.5673	5.89426	-0.698	-0.7546	-0.35467	-0.0566	0.34332	0.39993
chr8	70036864	70036873	-	chr8	70036812	70037151	CDS	Mau2	3.78821	3.69717	5.2861	3.40953	0.02113	-0.30942	0.09	-0.33055	0.06887	0.39942
chrX	11994207	11994216	-	chrX	11993478	11994526	NA	NA	16.775	23.6016	23.0435	16.8756	-0.43793	-0.40672	-0.00752	0.03121	0.4304	0.39919
chr1	155408318	155408327	+	chr1	155407773	155409213	CDS	Xpr1	4.14766	5.98348	5.24488	3.38662	-0.35305	-0.22121	0.17615	0.13184	0.5292	0.39736
chr16	20706663	20706672	+	chr16	20706540	20707101	CDS	Clcn2	10.5457	8.00399	10.0283	7.02664	0.31335	0.05851	0.45462	-0.25484	0.14127	0.39611
chr11	46439263	46439272	+	chr11	46438861	46439567	transcript	Med7	17.0899	15.7235	15.367	11.0872	0.10446	0.133	0.52872	0.02854	0.42426	0.39572
chr16	30872364	30872373	-	chr16	30871832	30873228	NA	NA	2.34489	7.42812	7.23275	4.91376	-1.03909	-1.01034	-0.61648	0.02875	0.42262	0.39387
chr12	77057143	77057152	+	chr12	77056641	77057461	NA	NA	3.88288	4.77243	7.1558	4.8641	-0.18896	-0.59922	-0.2071	-0.41025	-0.01814	0.39212
chr15	102460068	102460077	-	chr15	102459739	102460358	5UTR	Prr13	17.8703	14.4115	19.5294	14.3237	0.26885	-0.1131	0.27637	-0.38194	0.00753	0.38947
chr7	80419520	80419529	-	chr7	80419229	80419618	NA	NA	4.39895	4.80397	12.8433	9.22935	-0.08261	-1.1562	-0.76795	-1.07359	-0.68534	0.38825
chr15	62158945	62158954	-	chr15	62158141	62159697	exon	Pvt1	49.1868	56.246	55.6818	41.9653	-0.18479	-0.17085	0.21723	0.01393	0.40202	0.38809
chr17	28936431	28936440	-	chr17	28935985	28936944	exon	Gm16191	10.6015	10.8065	17.1464	12.5295	-0.02244	-0.5855	-0.19844	-0.56306	-0.176	0.38706
chr9	44892927	44892936	-	chr9	44892548	44893202	exon	Gm30883	2.96009	7.90641	10.6487	7.572	-0.9338	-1.27201	-0.88656	-0.33821	0.04724	0.38546
chr2	156898193	156898202	-	chr2	156898044	156898737	exon	Gm14248	2.0148	2.33873	3.13118	1.81833	-0.10053	-0.32045	0.06457	-0.21992	0.16511	0.38503
chr13	74752085	74752094	+	chr13	74752020	74753176	CDS	Cast	4.01758	3.91497	4.24896	2.68432	0.02299	-0.05053	0.33169	-0.07352	0.3087	0.38222
chr10	77671742	77671751	+	chr10	77671199	77672030	NA	NA	11.7457	23.409	23.0073	17.0922	-0.86414	-0.84157	-0.46049	0.02257	0.40365	0.38108
chr6	108427002	108427011	-	chr6	108425637	108427346	CDS	Itpr1	3.69644	10.7538	13.4923	9.78938	-1.10017	-1.37164	-0.99095	-0.27147	0.10921	0.38068
chr1	174426465	174426474	+	chr1	174426201	174426936	NA	NA	9.18094	10.3871	12.2601	8.84783	-0.14208	-0.33823	0.04184	-0.19615	0.18391	0.38006
chr5	96938943	96938952	+	chr5	96938629	96939404	transcript	Gm46916	9.74583	12.5916	8.47596	5.94442	-0.30204	0.1583	0.53762	0.46035	0.83967	0.37932
chr17	29443985	29443994	+	chr17	29443643	29444351	exon	Gm26885	18.6481	32.0047	22.4484	16.6967	-0.70696	-0.23869	0.13985	0.46827	0.84681	0.37854
chr1	77281905	77281914	+	chr1	77281445	77282454	NA	NA	5.6931	6.21923	13.9904	10.2014	-0.09007	-1.01149	-0.63416	-0.92142	-0.54409	0.37733
chr1	165331025	165331034	+	chr1	165330844	165331560	CDS	Dcaf6	2.59186	4.10544	5.15148	3.40057	-0.37718	-0.59006	-0.21369	-0.21287	0.16349	0.37637
chr5	146699644	146699653	+	chr5	146699418	146700184	exon	Gm34700	6.63929	6.36868	6.58538	4.50573	0.04349	0.00856	0.38482	-0.03493	0.34133	0.37626
chr19	37464696	37464705	+	chr19	37464499	37465120	exon	1700122C19Rik	3.76929	5.23833	6.37832	4.34724	-0.30488	-0.50377	-0.12773	-0.1989	0.17714	0.37604
chr1	36130935	36130944	+	chr1	36129977	36131049	3UTR	Uggt1	7.10664	10.6777	11.3247	8.16568	-0.45708	-0.52636	-0.15127	-0.06928	0.30581	0.37509
chr7	45486219	45486228	-	chr7	45486133	45486556	5UTR	Tulp2	4.79814	11.5349	10.3712	7.43489	-0.94592	-0.82081	-0.44636	0.12511	0.49956	0.37445
chr13	35835857	35835866	-	chr13	35835595	35836091	NA	NA	6.3252	12.3875	10.5884	7.61465	-0.75617	-0.57	-0.1973	0.18617	0.55887	0.3727
chr11	115194973	115194982	+	chr11	115194445	115195799	exon	Tmem104	3.85719	4.52114	2.97931	1.7387	-0.14388	0.21536	0.58777	0.35924	0.73166	0.37242
chr16	10772338	10772347	-	chr16	10772026	10772679	NA	NA	3.46796	12.8764	17.4783	12.9508	-1.36932	-1.74761	-1.3763	-0.37829	-0.00698	0.37131
chr3	153858270	153858279	+	chr3	153858233	153858881	exon	Msh4	2.24164	2.95489	3.19244	1.91119	-0.20322	-0.26501	0.10482	-0.06179	0.30804	0.36983
chr10	111580795	111580804	-	chr10	111580296	111581362	exon	4933440J02Rik	4.77228	6.39475	6.31986	4.3332	-0.2915	-0.27927	0.09018	0.01223	0.38169	0.36945
chr11	4339554	4339563	-	chr11	4338963	4339991	3UTR	Hormad2	2.57524	2.60401	5.45126	3.66097	-0.0082	-0.65043	-0.28101	-0.64223	-0.27281	0.36942
chr3	96374598	96374607	-	chr3	96373255	96375134	exon	Rnu1b2	1.9397	5.1233	2.67825	1.52331	-0.78355	-0.22323	0.14297	0.56032	0.92652	0.3662
chr15	12290751	12290760	-	chr15	12290216	12291104	transcript	Gm46497	3.70679	4.78335	2.99284	1.77327	-0.23166	0.1771	0.5413	0.40876	0.77296	0.3642
chr3	10243832	10243841	-	chr3	10243438	10244208	3UTR	Fabp12	4.20188	12.8435	10.9101	7.9284	-1.1982	-1.00353	-0.63992	0.19467	0.55828	0.36361
chr13	47194719	47194728	+	chr13	47193519	47195361	5UTR	Rnf144b	3.33909	6.10748	7.41824	5.21546	-0.56195	-0.76703	-0.4036	-0.20508	0.15835	0.36343
chr6	31642928	31642937	+	chr6	31642188	31643048	transcript	Gm31486	4.9438	4.64173	6.02517	4.13437	0.05998	-0.19634	0.16671	-0.25632	0.10672	0.36305
chr12	110782556	110782565	-	chr12	110781900	110782869	exon	Wdr20	6.16621	5.78448	7.03647	4.94282	0.06519	-0.13846	0.22028	-0.20365	0.15508	0.35873
chr15	79390423	79390432	-	chr15	79390395	79391112	5UTR	Tmem184b	1.29646	2.98712	3.49885	2.18504	-0.5345	-0.66373	-0.30532	-0.12923	0.22918	0.35841
chr5	147388530	147388539	+	chr5	147388178	147388986	NA	NA	5.56437	5.16383	5.327	3.61512	0.07374	0.04325	0.40069	-0.0305	0.32695	0.35744
chr13	23556097	23556106	-	chr13	23554887	23556610	CDS	H1f3	54.4695	62.025	84.2561	65.2301	-0.17975	-0.607	-0.24971	-0.42726	-0.06997	0.35729
chr17	34218965	34218974	-	chr17	34218225	34219440	transcript	Tap2	5.05156	9.53522	15.6173	11.6758	-0.6743	-1.26547	-0.91094	-0.59117	-0.23664	0.35453
chr19	59905679	59905688	-	chr19	59905392	59906809	3UTR	Rab11fip2	5.31325	3.72283	4.94034	3.3283	0.3296	0.0708	0.42451	-0.2588	0.09491	0.35371
chr1	59901225	59901234	-	chr1	59901204	59902250	NA	NA	0.59185	1.69212	2.42655	1.36571	-0.44246	-0.67672	-0.32475	-0.23426	0.11772	0.35198
chr5	23789445	23789454	-	chr5	23788494	23789544	5UTR	Rint1	13.5057	15.2416	19.3686	14.6482	-0.14878	-0.45091	-0.09963	-0.30213	0.04915	0.35128
chr11	29533093	29533102	-	chr11	29532473	29533366	5UTR	Mtif2	3.48058	5.81468	6.54799	4.60314	-0.47717	-0.59948	-0.24918	-0.12231	0.22799	0.3503
chr11	62580414	62580423	+	chr11	62580126	62580746	CDS	Trpv2	7.63385	14.3885	10.6975	7.85969	-0.73836	-0.38195	-0.03188	0.35641	0.70648	0.35007
chr11	89026297	89026306	+	chr11	89026180	89026422	transcript	Trim25	4.9141	4.81692	9.21241	6.70306	0.0191	-0.66158	-0.31284	-0.68069	-0.33195	0.34874
chr14	21766661	21766670	-	chr14	21765633	21766865	NA	NA	22.1839	19.1779	15.5572	11.7108	0.18756	0.45156	0.79772	0.264	0.61016	0.34616
chr1	177716633	177716642	-	chr1	177716434	177717922	exon	Gm30115	7.37498	22.7081	14.6408	11.0003	-1.35439	-0.79722	-0.45218	0.55716	0.90221	0.34504
chr9	120132779	120132788	+	chr9	120132680	120133947	exon	Gm5922	3.46496	2.79776	4.6638	3.14625	0.17194	-0.26528	0.07958	-0.43722	-0.09236	0.34487
chr7	16241173	16241182	-	chr7	16239482	16241273	5UTR	C5ar2	14.9373	11.0874	17.5788	13.3154	0.36053	-0.20379	0.14107	-0.56432	-0.21946	0.34485
chr6	85357031	85357040	-	chr6	85356707	85357984	NA	NA	3.21017	1.8557	3.13517	1.94278	0.39271	0.01916	0.36398	-0.37355	-0.02873	0.34482
chr7	97209746	97209755	+	chr7	97208619	97210646	NA	NA	3.99895	3.95882	5.31497	3.663	0.00897	-0.26702	0.07689	-0.276	0.06792	0.34392
chr11	34332801	34332810	-	chr11	34332435	34333190	NA	NA	5.7606	6.26498	8.73846	6.3618	-0.08577	-0.44535	-0.10167	-0.35958	-0.0159	0.34368
chr3	144662580	144662589	-	chr3	144662118	144662826	NA	NA	8.49432	7.40192	10.7298	7.93642	0.15136	-0.26762	0.07532	-0.41898	-0.07604	0.34293
chr16	20703919	20703928	-	chr16	20703333	20704658	CDS	Clcn2	14.7714	18.5051	16.7029	12.648	-0.28274	-0.15316	0.18957	0.12958	0.47231	0.34273
chr2	93008431	93008440	-	chr2	93007821	93009028	transcript	Prdm11	7.93292	18.5775	17.8319	13.5418	-1.01641	-0.96438	-0.62197	0.05203	0.39444	0.34241
chr10	111583540	111583549	-	chr10	111583029	111584143	exon	Gm30262	3.06111	4.07451	7.22906	5.17922	-0.24257	-0.80987	-0.46748	-0.5673	-0.22491	0.34239
chr10	93921438	93921447	-	chr10	93921010	93921565	NA	NA	12.2595	15.3429	9.82024	7.2348	-0.27415	0.26112	0.60175	0.53528	0.87591	0.34063
chr18	11796037	11796046	+	chr18	11795925	11797228	NA	NA	3.32755	3.16645	2.54636	1.49315	0.04063	0.20866	0.54838	0.16803	0.50775	0.33972
chr13	107075090	107075099	-	chr13	107074482	107075696	exon	Gm31452	4.00416	6.26506	5.67611	3.97505	-0.43192	-0.33125	0.0065	0.10066	0.43841	0.33775
chrX	9316610	9316619	+	chrX	9315949	9317077	transcript	Xk	6.84529	6.02323	5.87955	4.14237	0.13323	0.15784	0.4942	0.0246	0.36097	0.33637
chr11	69599402	69599411	-	chr11	69599284	69599849	3UTR	Atp1b2	3.92134	4.22594	5.03758	3.48127	-0.06713	-0.23211	0.10286	-0.16498	0.16999	0.33497
chr8	117360652	117360661	+	chr8	117359866	117360823	transcript	Cmip	4.06813	2.78293	4.30515	2.90643	0.31556	-0.05135	0.28206	-0.36691	-0.0335	0.3334
chr3	95734468	95734477	-	chr3	95733700	95734814	stop_codon	Ecm1	3.14259	4.443	5.26718	3.67571	-0.30047	-0.46289	-0.13083	-0.16242	0.16964	0.33205
chr5	105411187	105411196	-	chr5	105410898	105411589	transcript	Gm32051	41.6817	67.8897	50.044	39.3341	-0.67223	-0.25021	0.07882	0.42202	0.75105	0.32903
chr15	77755270	77755279	-	chr15	77754870	77755780	CDS	Apol8	13.77	17.4118	13.4701	10.2413	-0.29184	0.02688	0.35334	0.31872	0.64519	0.32647
chr16	16941171	16941180	-	chr16	16940488	16941494	transcript	Gm46540	6.81097	8.42543	9.11872	6.77226	-0.23129	-0.32026	0.00603	-0.08897	0.23732	0.32629
chr13	100511148	100511157	-	chr13	100511136	100512333	CDS	Ocln	0.89638	0.7241	2.11001	1.18318	0.0757	-0.44374	-0.11783	-0.51945	-0.19354	0.32591
chr7	4743580	4743589	+	chr7	4743387	4743610	CDS	Kmt5c	13.5095	12.5746	11.873	8.9754	0.08696	0.15584	0.48133	0.06888	0.39436	0.32548
chr6	38924234	38924243	-	chr6	38923539	38924848	exon	Tbxas1	51.5287	44.8143	54.9357	43.3493	0.19155	-0.08826	0.23695	-0.27981	0.0454	0.32522
chr10	82790720	82790729	-	chr10	82790491	82790992	NA	NA	4.10446	5.88399	7.11338	5.17894	-0.34542	-0.54341	-0.21828	-0.19799	0.12715	0.32514
chr1	183227534	183227543	-	chr1	183227212	183227934	NA	NA	7.66734	7.93892	9.72632	7.26483	-0.03813	-0.26668	0.05843	-0.22855	0.09656	0.32511
chr9	67878635	67878644	-	chr9	67878341	67878921	CDS	Vps13c	19.08	30.7999	22.1568	17.1877	-0.62644	-0.19251	0.13257	0.43394	0.75902	0.32508
chr18	61331085	61331094	-	chr18	61329941	61331691	NA	NA	3.73682	3.92644	6.30847	4.53708	-0.04339	-0.49987	-0.17486	-0.45648	-0.13147	0.32501
chr3	68493301	68493310	-	chr3	68493108	68494736	5UTR	Schip1	8.24899	9.59501	9.1436	6.81737	-0.17061	-0.11561	0.20675	0.055	0.37736	0.32236
chr5	121593839	121593848	+	chr5	121593050	121594449	transcript	Aldh2	28.9	23.2929	25.1205	19.599	0.28406	0.18519	0.5073	-0.09886	0.22324	0.3221
chr5	20899120	20899129	+	chr5	20899003	20899481	CDS	Rsbn1l	6.64886	9.06215	5.45055	3.86984	-0.33862	0.20317	0.52416	0.54178	0.86277	0.32099
chr3	51878764	51878773	+	chr3	51878144	51879133	NA	NA	9.11753	9.24803	13.3143	10.1787	-0.01615	-0.4458	-0.12638	-0.42965	-0.11023	0.31942
chr10	93708892	93708901	-	chr10	93708083	93709299	CDS	Ntn4	6.96319	4.04357	5.63918	4.03164	0.53405	0.2181	0.53669	-0.31595	0.00264	0.31859
chr10	63281742	63281751	+	chr10	63281490	63281771	transcript	Herc4	4.62129	3.19958	4.73563	3.30918	0.32262	-0.02306	0.29502	-0.34569	-0.02761	0.31808
chr17	74904460	74904469	+	chr17	74903546	74905576	NA	NA	17.4099	8.63149	9.78796	7.3624	0.84035	0.69743	1.01543	-0.14292	0.17508	0.318
chr4	134774376	134774385	-	chr4	134774163	134774481	NA	NA	5.5315	12.1005	12.0408	9.1764	-0.86442	-0.85849	-0.54134	0.00593	0.32308	0.31715
chr5	20816402	20816411	+	chr5	20815807	20816608	transcript	Phtf2	3.04271	4.02129	2.82737	1.78886	-0.2356	0.05745	0.37202	0.29305	0.60762	0.31457
chr6	134082751	134082760	-	chr6	134082241	134083801	NA	NA	7.42656	8.67111	17.0842	13.2548	-0.17083	-0.98222	-0.66784	-0.81138	-0.49701	0.31437
chr8	10995948	10995957	-	chr8	10995410	10997485	transcript	Irs2	6.15405	9.87409	15.2395	11.778	-0.5172	-1.03777	-0.72408	-0.52057	-0.20688	0.31369
chr8	123397672	123397681	+	chr8	123397376	123399113	CDS	Tcf25	2.07406	5.19731	6.3859	4.66383	-0.75427	-0.9621	-0.65028	-0.20783	0.10399	0.31182
chr11	60774978	60774987	+	chr11	60774836	60775254	CDS	Top3a	5.40453	7.34289	12.338	9.48907	-0.31735	-0.9108	-0.60261	-0.59344	-0.28526	0.30818
chr8	10996011	10996020	-	chr8	10995410	10997485	transcript	Irs2	4.80486	6.02814	7.73978	5.7795	-0.22412	-0.48875	-0.1813	-0.26463	0.04282	0.30745
chr1	21334376	21334385	+	chr1	21332875	21334549	NA	NA	1.81055	2.24402	3.05016	1.99099	-0.13905	-0.36664	-0.05952	-0.22759	0.07953	0.30712
chr17	45227119	45227128	-	chr17	45226783	45228127	NA	NA	1.53929	3.61053	2.52361	1.56632	-0.60041	-0.31648	-0.00969	0.28393	0.59072	0.30679
chr13	95688271	95688280	-	chr13	95688034	95689418	exon	Gm48745	3.24101	4.1981	3.79183	2.59782	-0.2234	-0.13276	0.17226	0.09064	0.39566	0.30502
chr19	5269090	5269099	-	chr19	5268616	5269241	CDS	Pacs1	23.3677	24.8313	27.1855	21.543	-0.07948	-0.1988	0.10565	-0.11932	0.18513	0.30445
chr14	71200800	71200809	-	chr14	71199232	71201586	NA	NA	3.56757	2.90709	4.99884	3.57969	0.16704	-0.30675	-0.00289	-0.47379	-0.16993	0.30386
chr11	117325700	117325709	+	chr11	117325304	117325912	transcript	Gm34065	4.93481	11.1973	12.468	9.6409	-0.88387	-1.01209	-0.7095	-0.12822	0.17438	0.3026
chr6	58648559	58648568	+	chr6	58648011	58648781	transcript	Abcg2	6.52193	8.23937	7.67159	5.75245	-0.25208	-0.17352	0.12901	0.07856	0.38109	0.30252
chr17	11849587	11849596	+	chr17	11849166	11849861	NA	NA	2.14167	3.95223	5.14642	3.70509	-0.47747	-0.72338	-0.42088	-0.24591	0.05658	0.30249
chr3	96423935	96423944	+	chr3	96423831	96424148	exon	n-TGccc6	2.41136	3.17607	3.94243	2.73901	-0.20982	-0.39333	-0.09366	-0.18351	0.11616	0.29967
chr4	59154775	59154784	+	chr4	59154627	59155045	exon	Rpsa-ps11	4.94886	4.89901	3.59184	2.45638	0.00972	0.29128	0.59031	0.28156	0.58059	0.29903
chr18	60780522	60780531	-	chr18	60779413	60780894	transcript	Gm8731	2.02877	8.21895	7.63252	5.7409	-1.24784	-1.16647	-0.86748	0.08138	0.38036	0.29898
chr2	93008073	93008082	-	chr2	93007821	93009028	transcript	Prdm11	3.73332	3.98691	4.82982	3.46453	-0.05777	-0.23469	0.06387	-0.17692	0.12164	0.29856
chr12	77057052	77057061	-	chr12	77056641	77057461	NA	NA	5.14216	6.33967	8.26823	6.26091	-0.21069	-0.49618	-0.19774	-0.28549	0.01295	0.29844
chr5	3461215	3461224	+	chr5	3460311	3461328	NA	NA	2.34041	3.02658	4.34223	3.07243	-0.19224	-0.50165	-0.20422	-0.30941	-0.01198	0.29743
chr5	121209654	121209663	-	chr5	121209540	121210249	transcript	Rpl6	4.17518	4.23998	6.22595	4.60546	-0.01399	-0.38785	-0.09047	-0.37386	-0.07648	0.29738
chr11	85530049	85530058	+	chr11	85529599	85530858	NA	NA	17.6471	18.0736	14.0982	11.0155	-0.03026	0.27995	0.57688	0.31021	0.60714	0.29693
chr2	155617141	155617150	+	chr2	155616967	155617217	5UTR	Myh7b	4.09868	5.2774	5.51397	4.03013	-0.23799	-0.28136	0.01513	-0.04337	0.25311	0.29649
chr15	78896904	78896913	+	chr15	78895756	78897295	transcript	Gga1	6.44496	6.03972	7.31012	5.49549	0.06709	-0.13357	0.1624	-0.20066	0.09531	0.29597
chr11	4236725	4236734	+	chr11	4235145	4237999	5UTR	Osm	7.81778	12.1021	12.4388	9.68206	-0.50213	-0.53508	-0.24019	-0.03295	0.26194	0.29489
chr13	112123240	112123249	+	chr13	112122870	112123797	NA	NA	1.21655	3.01999	3.0946	2.0662	-0.57407	-0.59353	-0.29895	-0.01946	0.27512	0.29458
chr4	101238829	101238838	+	chr4	101238721	101239937	exon	Gm52754	3.72027	6.37196	7.51051	5.67223	-0.51411	-0.68879	-0.39522	-0.17468	0.11889	0.29357
chr14	21196957	21196966	-	chr14	21196674	21197429	transcript	Adk	2.68014	2.84155	2.8781	1.89379	-0.04449	-0.05438	0.23885	-0.00989	0.28334	0.29322
chr12	105019754	105019763	-	chr12	105019328	105020325	transcript	Gm46375	40.8518	24.2383	33.658	27.0164	0.69773	0.26195	0.55499	-0.43578	-0.14274	0.29303
chr14	40992832	40992841	+	chr14	40992036	40992963	3UTR	Prxl2a	4.81661	7.37879	7.43292	5.61652	-0.43451	-0.44242	-0.1502	-0.0079	0.28431	0.29222
chr2	115610278	115610287	-	chr2	115610113	115610806	exon	BC052040	4.60737	4.8057	4.35832	3.1128	-0.03985	0.05166	0.34203	0.09151	0.38188	0.29037
chr6	136804447	136804456	-	chr6	136803072	136804604	3UTR	H4f16	36.9425	33.281	44.756	36.1571	0.14065	-0.26091	0.02903	-0.40156	-0.11162	0.28994
chr6	88003619	88003628	+	chr6	88003301	88004251	CDS	Rab7	1.21398	3.06732	4.1905	2.97909	-0.58745	-0.85373	-0.56429	-0.26628	0.02316	0.28944
chr7	98157764	98157773	+	chr7	98157620	98158015	CDS	Capn5	2.90292	4.35018	4.89314	3.5544	-0.3439	-0.45435	-0.16501	-0.11045	0.17889	0.28935
chr6	122610485	122610494	+	chr6	122609030	122610672	CDS	Gdf3	4.09092	3.99077	4.82823	3.50153	0.02218	-0.15357	0.13572	-0.17575	0.11354	0.28929
chr13	107569693	107569702	-	chr13	107568475	107569829	transcript	Gm31920	10.9313	5.85011	6.77165	5.09756	0.68746	0.53598	0.82418	-0.15149	0.13671	0.2882
chr11	22931416	22931425	+	chr11	22931311	22932080	transcript	Commd1	4.68895	7.09458	8.14699	6.2359	-0.41777	-0.56832	-0.28212	-0.15055	0.13565	0.2862
chr13	49358431	49358440	-	chr13	49358211	49359267	NA	NA	3.43005	6.21936	5.58134	4.13712	-0.55824	-0.44827	-0.1632	0.10997	0.39504	0.28507
chr11	68899156	68899165	+	chr11	68898640	68899439	transcript	Rnf222	7.38777	4.24767	7.62925	5.82083	0.55305	-0.0349	0.24964	-0.58795	-0.30341	0.28455
chr3	52787685	52787694	-	chr3	52787419	52788775	exon	Gm30292	4.36687	4.0353	4.42068	3.18784	0.07168	-0.0113	0.27293	-0.08299	0.20124	0.28423
chr6	66272051	66272060	-	chr6	66271038	66272647	exon	Gm36408	3.1815	3.40001	4.69714	3.41568	-0.05469	-0.34257	-0.05854	-0.28787	-0.00384	0.28403
chr16	29881831	29881840	+	chr16	29881192	29881974	NA	NA	4.63621	4.49529	5.98842	4.48228	0.02888	-0.25119	0.03158	-0.28007	0.0027	0.28277
chr11	94350050	94350059	+	chr11	94349926	94351666	CDS	Abcc3	5.52096	4.63416	6.77201	5.14623	0.16962	-0.20975	0.06926	-0.37937	-0.10036	0.27901
chr11	105143777	105143786	-	chr11	105143440	105143999	transcript	Mettl2	3.93587	4.46988	3.87366	2.7602	-0.11545	0.01407	0.29235	0.12952	0.4078	0.27827
chrX	93305889	93305898	-	chrX	93305441	93306457	exon	Pola1	6.41119	6.14809	5.69795	4.26469	0.04337	0.12073	0.39895	0.07736	0.35559	0.27823
chr14	79621394	79621403	-	chr14	79620806	79621517	CDS	Sugt1	10.8391	7.22465	7.40516	5.67249	0.45701	0.4304	0.70863	-0.02661	0.25162	0.27822
chr16	21779391	21779400	-	chr16	21778169	21779656	CDS	Ehhadh	1.66494	2.37569	4.09259	2.94242	-0.22865	-0.66593	-0.38811	-0.43728	-0.15946	0.27782
chr1	127291631	127291640	-	chr1	127291274	127292314	exon	Gm51747	1.19699	1.7505	2.3657	1.52047	-0.20263	-0.39878	-0.12185	-0.19615	0.08078	0.27694
chr7	126625589	126625598	+	chr7	126625315	126625993	transcript	Nupr1	15.0167	16.6816	21.2994	17.1505	-0.13118	-0.44277	-0.16607	-0.31159	-0.03489	0.2767
chr2	4832156	4832165	-	chr2	4831271	4832503	exon	Gm13176	6.02142	5.05052	4.45869	3.25035	0.17509	0.29328	0.5696	0.11819	0.39451	0.27632
chr19	24439828	24439837	+	chr19	24439479	24440277	CDS	Pip5k1b	4.94942	5.96161	7.32002	5.61396	-0.18442	-0.39983	-0.1237	-0.21542	0.06072	0.27614
chr3	137977443	137977452	-	chr3	137977260	137977879	CDS	Dapp1	5.15718	6.09648	6.01455	4.53857	-0.16748	-0.15362	0.12197	0.01386	0.28945	0.27559
chr12	16033635	16033644	-	chr12	16033053	16034167	NA	NA	1.62862	1.74904	1.8331	1.08616	-0.04174	-0.07018	0.20462	-0.02844	0.24636	0.2748
chr14	62555371	62555380	+	chr14	62554875	62556418	5UTR	Fam124a	9.05101	19.4161	11.4466	9.05188	-0.92554	-0.27246	-0.00011	0.65307	0.92543	0.27235
chr2	28663044	28663053	+	chr2	28662699	28663419	CDS	Tsc1	16.2701	15.7999	12.2306	9.70423	0.03665	0.35018	0.62215	0.31353	0.5855	0.27197
chr12	86918802	86918811	+	chr12	86918633	86919178	NA	NA	4.10214	5.53982	7.34623	5.66256	-0.28526	-0.57854	-0.30719	-0.29328	-0.02193	0.27135
chrX	74273480	74273489	+	chrX	74273302	74274304	CDS	Dnase1l1	4.24486	4.54558	5.71919	4.32333	-0.06317	-0.28622	-0.01675	-0.22305	0.04642	0.26947
chr10	43710320	43710329	-	chr10	43710315	43710947	NA	NA	3.05889	2.04444	2.87794	1.96911	0.29223	0.04797	0.31649	-0.24426	0.02426	0.26851
chr1	191989257	191989266	+	chr1	191988973	191989434	transcript	Rd3	7.99908	6.39417	6.69287	5.13754	0.23999	0.19219	0.46044	-0.04779	0.22046	0.26825
chr19	35152139	35152148	-	chr19	35151285	35152893	exon	Gm31568	4.41762	3.42322	7.4532	5.76957	0.22482	-0.52657	-0.25844	-0.75139	-0.48326	0.26813
chr14	30512592	30512601	-	chr14	30512583	30513554	CDS	Dcp1a	2.57088	8.80876	5.38169	4.05494	-1.16129	-0.63896	-0.37205	0.52233	0.78923	0.2669
chr11	69600045	69600054	-	chr11	69599973	69600324	3UTR	Atp1b2	1.51064	4.73562	3.95457	2.87018	-0.85553	-0.6901	-0.42355	0.16543	0.43198	0.26655
chr11	33939891	33939900	-	chr11	33938669	33940303	transcript	Gm36395	3.29831	5.90051	5.86598	4.46138	-0.53689	-0.53092	-0.26484	0.00596	0.27204	0.26608
chr12	51855582	51855591	-	chr12	51855315	51856134	NA	NA	21.6743	41.1228	37.5435	30.8156	-0.85231	-0.72872	-0.46316	0.12359	0.38916	0.26556
chr9	62082948	62082957	-	chr9	62082752	62083635	5UTR	Glce	2.98254	3.46639	4.71322	3.5059	-0.12258	-0.39747	-0.13214	-0.27489	-0.00956	0.26533
chr1	136103103	136103112	-	chr1	136102088	136103478	CDS	Cacna1s	5.64558	9.7214	9.42377	7.4288	-0.58688	-0.55124	-0.28644	0.03565	0.30044	0.26479
chr1	178676226	178676235	-	chr1	178675221	178676407	NA	NA	11.2191	9.04067	7.01944	5.4309	0.24998	0.52846	0.79266	0.27848	0.54268	0.2642
chr2	121587774	121587783	-	chr2	121587482	121588585	5UTR	Frmd5	10.7689	9.99848	14.5673	11.7244	0.08647	-0.36383	-0.10052	-0.4503	-0.18699	0.26331
chr7	97210180	97210189	+	chr7	97208619	97210646	NA	NA	5.06802	11.5676	9.58721	7.57889	-0.89671	-0.67738	-0.41461	0.21933	0.48211	0.26277
chr11	94071207	94071216	-	chr11	94070258	94071323	exon	Gm38951	1.0006	1.82598	3.24152	2.29346	-0.30751	-0.7181	-0.45642	-0.41059	-0.1489	0.26168
chr1	86268339	86268348	+	chr1	86268323	86269615	stop_codon	Armc9	2.86945	5.758	5.09463	3.8451	-0.62351	-0.50229	-0.24196	0.12122	0.38154	0.26033
chr10	62471450	62471459	+	chr10	62471099	62471686	CDS	Vps26a	2.59622	5.10569	4.78245	3.58511	-0.58013	-0.51725	-0.25707	0.06288	0.32305	0.26017
chr17	35832943	35832952	+	chr17	35832911	35833254	transcript	Flot1	4.14917	5.2743	7.01752	5.4561	-0.22637	-0.51914	-0.25983	-0.29277	-0.03346	0.25931
chr10	61676111	61676120	+	chr10	61676013	61676374	transcript	1700022H01Rik	7.48394	14.4759	20.9566	17.178	-0.76738	-1.2345	-0.98079	-0.46712	-0.2134	0.25372
chr6	57504538	57504547	+	chr6	57503193	57505024	3UTR	Ppm1k	2.52133	2.00221	2.55955	1.75051	0.15831	-0.011	0.24182	-0.16931	0.0835	0.25281
chr3	88618629	88618638	-	chr3	88618190	88618864	exon	Gm20652	29.0695	21.5851	16.8968	13.7872	0.39077	0.70347	0.95592	0.3127	0.56516	0.25245
chr6	22474672	22474681	-	chr6	22474147	22475100	NA	NA	3.1085	4.49536	8.10203	6.40513	-0.32013	-0.92186	-0.66954	-0.60173	-0.34941	0.25232
chr3	89822161	89822170	-	chr3	89819916	89822228	exon	Gm8969	0.93329	3.64991	3.3083	2.38077	-0.8459	-0.76308	-0.51083	0.08281	0.33507	0.25226
chr1	133798070	133798079	+	chr1	133797737	133798993	5UTR	Atp2b4	21.7479	16.6235	17.1385	13.9986	0.34294	0.30454	0.55626	-0.03839	0.21332	0.25171
chr7	46676188	46676197	-	chr7	46675741	46676453	NA	NA	5.78146	8.12608	6.49594	5.0718	-0.36067	-0.11975	0.12968	0.24091	0.49035	0.24944
chr3	86627575	86627584	-	chr3	86626988	86627924	CDS	Lrba	5.76044	9.35066	5.59428	4.31692	-0.52208	0.02941	0.27808	0.55149	0.80015	0.24867
chr1	195101126	195101135	+	chr1	195100648	195101235	3UTR	Cr1l	3.63037	1.71155	2.84093	2.00728	0.54447	0.1998	0.44596	-0.34466	-0.0985	0.24616
chr4	150915351	150915360	-	chr4	150915100	150915512	NA	NA	6.47024	4.45472	7.08815	5.5964	0.36839	-0.09638	0.14833	-0.46477	-0.22006	0.24471
chr5	146699907	146699916	-	chr5	146699418	146700184	exon	Gm34700	8.03858	16.6488	13.0582	10.6369	-0.8632	-0.56316	-0.31866	0.30004	0.54453	0.2445
chr16	95440618	95440627	+	chr16	95438857	95440635	transcript	Erg	3.57556	5.03192	7.1703	5.67139	-0.31122	-0.67288	-0.42918	-0.36166	-0.11796	0.2437
chr3	84703696	84703705	+	chr3	84703121	84704028	3UTR	Tmem154	16.0699	23.6496	14.5285	11.8986	-0.49442	0.1252	0.36764	0.61962	0.86205	0.24244
chr2	131854017	131854026	+	chr2	131853261	131854692	3UTR	Erv3	7.77186	3.70395	4.91173	3.77325	0.72988	0.47225	0.71378	-0.25763	-0.01609	0.24153
chr6	129230747	129230756	+	chr6	129229487	129230795	transcript	Gm38906	3.14891	7.07831	4.90643	3.77318	-0.76457	-0.39241	-0.1519	0.37216	0.61267	0.24051
chr14	105288443	105288452	-	chr14	105287615	105288928	CDS	Ndfip2	0	1.53434	1.27132	0.69639	-0.69624	-0.59832	-0.35786	0.09793	0.33838	0.24045
chr12	71902008	71902017	+	chr12	71901837	71902508	exon	Daam1	30.924	13.6471	9.26	7.47051	1.05082	1.50909	1.74783	0.45827	0.697	0.23873
chr9	108035996	108036005	+	chr9	108035184	108036739	CDS	Ip6k1	1.70524	3.98652	4.10779	3.10863	-0.62846	-0.65529	-0.41774	-0.02683	0.21072	0.23755
chr2	6359544	6359553	+	chr2	6359004	6360162	exon	Usp6nl	2.21125	3.34088	3.32848	2.45042	-0.31165	-0.30857	-0.07183	0.00308	0.23981	0.23673
chr1	40361109	40361118	+	chr1	40361034	40361329	CDS	Il1rl2	9.5688	7.59831	5.18911	4.02974	0.25779	0.65219	0.88887	0.39441	0.63108	0.23667
chr7	98157815	98157824	+	chr7	98157620	98158015	CDS	Capn5	3.4201	5.95492	5.94822	4.67418	-0.5161	-0.51496	-0.27832	0.00115	0.23778	0.23664
chr9	65070583	65070592	+	chr9	65070043	65071169	transcript	Dpp8	33.152	24.3372	21.1923	17.6168	0.4101	0.59011	0.82641	0.18	0.41631	0.2363
chr3	152936442	152936451	+	chr3	152936079	152937091	NA	NA	2.83409	3.99088	5.57422	4.36268	-0.28445	-0.60051	-0.36513	-0.31606	-0.08068	0.23539
chr5	96951784	96951793	+	chr5	96951213	96952514	NA	NA	29.7046	17.7208	22.4894	18.7529	0.67213	0.36629	0.60022	-0.30583	-0.07191	0.23392
chr5	97010233	97010242	-	chr5	97009675	97010413	NA	NA	8.78449	11.2407	11.8946	9.74518	-0.28471	-0.35192	-0.11814	-0.0672	0.16658	0.23378
chr3	84700203	84700212	-	chr3	84699944	84700648	CDS	Tmem154	6.3665	5.58064	6.3799	5.06446	0.13431	-0.00219	0.22987	-0.1365	0.09555	0.23205
chr2	153576266	153576275	+	chr2	153575636	153576605	NA	NA	14.0444	14.2629	23.3927	19.559	-0.01896	-0.64703	-0.4156	-0.62807	-0.39664	0.23143
chr1	86243598	86243607	-	chr1	86243488	86243941	CDS	Armc9	3.80059	6.17103	5.73111	4.52008	-0.46237	-0.38702	-0.15662	0.07535	0.30575	0.2304
chr16	75852596	75852605	-	chr16	75852223	75852907	3UTR	Samsn1	2.69427	6.49952	4.45433	3.43811	-0.79604	-0.42285	-0.194	0.37318	0.60203	0.22885
chr16	32697059	32697068	+	chr16	32696535	32698065	NA	NA	5.04664	3.42204	5.74364	4.54728	0.35113	-0.12787	0.09913	-0.479	-0.252	0.227
chr10	116513295	116513304	-	chr10	116512629	116513772	exon	Gm31593	1.95476	1.7191	2.73406	1.97595	0.07889	-0.23386	-0.00689	-0.31275	-0.08578	0.22697
chr11	72544882	72544891	+	chr11	72544351	72545361	5UTR	Spns3	11.0242	16.0039	18.08	15.1092	-0.45305	-0.60667	-0.38144	-0.15362	0.07161	0.22523
chr15	96641966	96641975	-	chr15	96640511	96643359	transcript	Slc38a1	7.69216	10.1922	12.8347	10.6229	-0.31722	-0.5906	-0.36546	-0.27338	-0.04824	0.22513
chr13	21249318	21249327	-	chr13	21248979	21249610	exon	n-TTagt3	2.57291	5.03466	4.63998	3.61292	-0.57319	-0.49529	-0.27033	0.0779	0.30286	0.22496
chr7	101134278	101134287	+	chr7	101134136	101134721	NA	NA	4.63487	6.19297	5.54361	4.3878	-0.28592	-0.17356	0.05104	0.11236	0.33696	0.2246
chr3	19634925	19634934	+	chr3	19634500	19635894	exon	n-TAagc14	14.6172	16.5256	15.8571	13.2216	-0.15272	-0.10105	0.12289	0.05167	0.27561	0.22394
chr14	61656579	61656588	+	chr14	61656097	61657361	NA	NA	14.1455	14.1451	9.70099	7.9781	3e-05	0.44897	0.6691	0.44893	0.66907	0.22014
chr6	86380787	86380796	-	chr6	86379848	86381034	transcript	Snrpg	4.19449	3.69183	4.5653	3.57074	0.11307	-0.07808	0.14169	-0.19115	0.02862	0.21976
chr4	62372205	62372214	+	chr4	62371708	62372218	NA	NA	3.23329	3.23822	2.52421	1.82559	-0.00125	0.19141	0.40864	0.19265	0.40988	0.21723
chr12	76241991	76242000	-	chr12	76240847	76242389	CDS	Tex21	12.574	10.5648	7.44748	6.06759	0.20677	0.60096	0.81702	0.39419	0.61025	0.21606
chr1	183134637	183134646	-	chr1	183133921	183135203	CDS	Disp1	21.1466	21.4715	27.2485	23.1453	-0.01971	-0.33151	-0.11719	-0.3118	-0.09748	0.21433
chr17	35045299	35045308	+	chr17	35044876	35045538	5UTR	Msh5	5.21967	5.03152	4.04269	3.14333	0.03572	0.23955	0.45381	0.20382	0.41809	0.21427
chr16	91372636	91372645	-	chr16	91372381	91374048	5UTR	Ifnar2	33.8983	29.3549	34.3711	29.3106	0.1925	-0.01863	0.19451	-0.21114	0.00201	0.21315
chr15	59480840	59480849	-	chr15	59480222	59481543	NA	NA	2.74453	4.9057	3.91654	3.0408	-0.49995	-0.29231	-0.07967	0.20764	0.42028	0.21264
chr18	4278574	4278583	-	chr18	4277952	4279494	NA	NA	2.38476	5.65066	9.22435	7.62801	-0.74176	-1.26771	-1.05604	-0.52595	-0.31428	0.21167
chr18	6739241	6739250	+	chr18	6739235	6739973	NA	NA	1.68255	1.2404	1.37242	0.85339	0.16227	0.11188	0.32103	-0.05039	0.15876	0.20915
chr15	31417988	31417997	-	chr15	31417483	31418982	NA	NA	26.9167	25.8009	25.0694	21.4	0.05584	0.09366	0.29993	0.03782	0.24409	0.20627
chr9	78476698	78476707	+	chr9	78475936	78477830	3UTR	Eef1a1	19.0296	19.8864	25.7656	22.0157	-0.05637	-0.39315	-0.18761	-0.33678	-0.13123	0.20554
chr19	37464641	37464650	-	chr19	37464499	37465120	exon	1700122C19Rik	2.44838	3.57183	4.65002	3.70944	-0.2966	-0.53337	-0.32908	-0.23676	-0.03247	0.20429
chr13	111684332	111684341	+	chr13	111684054	111684929	NA	NA	28.4262	29.1141	38.6284	33.233	-0.03176	-0.41161	-0.20859	-0.37985	-0.17683	0.20302
chr8	123105814	123105823	-	chr8	123105437	123106347	transcript	Rpl13	6.04066	9.42495	6.74326	5.53334	-0.48283	-0.11439	0.08863	0.36844	0.57146	0.20302
chr13	23542751	23542760	-	chr13	23542667	23543041	3UTR	H2bc9	8.11556	8.13006	8.70282	7.23786	-0.00197	-0.07787	0.12483	-0.0759	0.1268	0.2027
chr13	23542761	23542770	+	chr13	23542667	23543041	3UTR	H2bc9	8.11556	8.13006	8.70282	7.23786	-0.00197	-0.07787	0.12483	-0.0759	0.1268	0.2027
chr5	20816388	20816397	-	chr5	20815807	20816608	transcript	Phtf2	3.5059	4.45811	2.44985	1.80657	-0.21319	0.28035	0.48235	0.49354	0.69554	0.202
chr11	53617333	53617342	+	chr11	53617068	53618063	transcript	Il4	8.31455	9.02471	12.8706	10.8747	-0.09197	-0.50825	-0.30721	-0.41627	-0.21524	0.20104
chr7	126039644	126039653	-	chr7	126039188	126039959	NA	NA	35.833	40.7127	35.5181	30.5847	-0.17298	0.01191	0.21258	0.18489	0.38556	0.20067
chr14	105288477	105288486	-	chr14	105287615	105288928	CDS	Ndfip2	0.04104	2.0071	1.83054	1.27929	-0.83337	-0.77537	-0.57765	0.058	0.25572	0.19772
chr1	55092625	55092634	-	chr1	55092423	55093064	transcript	Hspe1	13.6771	41.3939	32.6133	28.1291	-1.44155	-1.11933	-0.92206	0.32222	0.51949	0.19727
chr13	74752640	74752649	+	chr13	74752020	74753176	CDS	Cast	0.71719	1.54246	0.95704	0.52305	-0.33186	-0.10456	0.09056	0.2273	0.42243	0.19513
chr13	81642621	81642630	-	chr13	81642233	81643642	NA	NA	15.1161	14.5464	14.5092	12.3749	0.0475	0.05066	0.24442	0.00316	0.19692	0.19376
chr14	40989238	40989247	-	chr14	40988632	40989329	3UTR	Prxl2a	4.00116	5.09206	4.52482	3.6512	-0.22464	-0.1122	0.08016	0.11244	0.3048	0.19237
chr17	33606990	33606999	-	chr17	33606352	33607853	CDS	Myo1f	1.7995	3.18801	3.97499	3.17006	-0.40593	-0.5937	-0.40135	-0.18777	0.00458	0.19235
chr19	21377067	21377076	+	chr19	21376510	21377777	NA	NA	4.81689	11.1231	13.2357	11.2793	-0.89917	-1.10752	-0.91564	-0.20836	-0.01648	0.19188
chr8	10996417	10996426	+	chr8	10995410	10997485	transcript	Irs2	28.6409	48.0786	36.305	31.4774	-0.70019	-0.31767	-0.12587	0.38251	0.57432	0.19181
chr1	91367109	91367118	-	chr1	91366029	91367298	exon	Erfe	10.2578	12.0762	10.8162	9.16274	-0.1926	-0.06192	0.12976	0.13068	0.32236	0.19168
chr8	110933491	110933500	+	chr8	110933248	110933875	5UTR	St3gal2	8.92869	11.6586	10.4099	8.81192	-0.30966	-0.1762	0.01485	0.13347	0.32452	0.19105
chr14	66266054	66266063	-	chr14	66265425	66266812	NA	NA	31.4168	32.666	40.9196	35.5832	-0.05222	-0.35659	-0.16728	-0.30437	-0.11506	0.18931
chr6	122763203	122763212	+	chr6	122762919	122765560	transcript	Slc2a3	5.83681	19.8938	14.7697	12.6664	-1.4284	-1.05304	-0.86537	0.37536	0.56303	0.18767
chr14	66265690	66265699	+	chr14	66265425	66266812	NA	NA	5.19936	6.33898	7.93028	6.66128	-0.19978	-0.43927	-0.2516	-0.23948	-0.05182	0.18766
chr11	87703909	87703918	-	chr11	87703566	87704460	exon	1110028F11Rik	8.54259	13.3129	11.9863	10.2258	-0.51907	-0.39243	-0.20514	0.12664	0.31393	0.18729
chr11	69426507	69426516	-	chr11	69426201	69426839	3UTR	Dnah2	4.87436	7.5606	5.13524	4.2138	-0.44951	-0.05033	0.1359	0.39918	0.58541	0.18623
chr10	93467442	93467451	-	chr10	93467041	93468199	CDS	Lta4h	10.981	9.48086	9.15372	7.75205	0.17055	0.21058	0.3959	0.04003	0.22536	0.18533
chr7	125472226	125472235	-	chr7	125471807	125472932	CDS	Nsmce1	31.8378	48.9878	46.0534	40.2056	-0.5848	-0.5001	-0.31484	0.0847	0.26996	0.18526
chr16	10774798	10774807	+	chr16	10774755	10775232	3UTR	Socs1	3.20964	3.74725	5.58516	4.61981	-0.1304	-0.50384	-0.31976	-0.37344	-0.18937	0.18408
chr5	107866544	107866553	-	chr5	107866086	107866789	CDS	Evi5	5.47872	5.3741	5.29536	4.37053	0.01911	0.03365	0.21651	0.01455	0.1974	0.18285
chr15	57951647	57951656	-	chr15	57951413	57952403	CDS	Tbc1d31	6.38935	6.59061	7.19651	6.0463	-0.03239	-0.12574	0.05695	-0.09335	0.08934	0.1827
chr8	94553482	94553491	+	chr8	94552653	94553681	CDS	Cpne2	2.99541	2.45522	3.81258	3.06605	0.15004	-0.2009	-0.01852	-0.35094	-0.16855	0.18239
chr11	80872148	80872157	+	chr11	80872138	80873448	transcript	Spaca3	0.58774	1.73175	3.15993	2.49117	-0.45806	-0.87987	-0.69756	-0.42181	-0.2395	0.18231
chr12	79769833	79769842	+	chr12	79769530	79770391	CDS	Rad51b	36.0735	26.1091	29.5916	25.7988	0.43148	0.26562	0.44723	-0.16586	0.01575	0.18161
chr15	53224469	53224478	-	chr15	53224183	53225920	NA	NA	2.06496	1.86581	2.30273	1.73786	0.06474	-0.07367	0.10791	-0.1384	0.04318	0.18158
chr6	31425778	31425787	+	chr6	31425236	31426157	5UTR	Mkln1	18.0501	13.9054	8.57979	7.28414	0.32544	0.8928	1.07267	0.56736	0.74723	0.17987
chr12	85337665	85337674	+	chr12	85337477	85338174	CDS	Nek9	21.7841	21.0133	18.8106	16.323	0.04659	0.18866	0.36797	0.14207	0.32139	0.17932
chr7	102478720	102478729	+	chr7	102478279	102478881	exon	Olfr543	5.3966	6.32877	7.27841	6.14142	-0.16149	-0.3093	-0.13045	-0.14781	0.03104	0.17884
chr7	142086865	142086874	-	chr7	142086215	142087631	transcript	Dusp8	7.46462	4.71121	4.88343	4.0275	0.46804	0.43386	0.6123	-0.03417	0.14427	0.17844
chr10	66994659	66994668	+	chr10	66994324	66996116	NA	NA	1.49256	3.21711	3.35034	2.67373	-0.52086	-0.55425	-0.37608	-0.03339	0.14478	0.17817
chr9	77955470	77955479	-	chr9	77954477	77956270	transcript	Elovl5	2.37251	4.62568	5.74342	4.79368	-0.55084	-0.76179	-0.58459	-0.21094	-0.03374	0.1772
chr11	97820850	97820859	+	chr11	97820690	97822116	transcript	Lasp1	12.8468	9.06702	11.3577	9.76938	0.40874	0.14752	0.3235	-0.26122	-0.08523	0.17599
chr11	76835124	76835133	+	chr11	76834564	76835243	CDS	Cpd	5.4783	9.7304	5.91593	4.95913	-0.61798	-0.07729	0.09741	0.54069	0.71539	0.1747
chr7	142087166	142087175	+	chr7	142086215	142087631	transcript	Dusp8	52.7437	41.2389	45.1985	39.7721	0.33707	0.21198	0.38632	-0.1251	0.04924	0.17434
chr15	76909000	76909009	-	chr15	76906928	76909029	transcript	Rpl8	1.82903	4.91659	4.25064	3.48668	-0.78039	-0.64415	-0.47016	0.13624	0.31023	0.17399
chr1	182108909	182108918	+	chr1	182108302	182109178	transcript	Gm39719	1.93659	1.58681	4.50495	3.71584	0.11921	-0.66208	-0.48897	-0.7813	-0.60818	0.17312
chr13	23396581	23396590	-	chr13	23395606	23397430	exon	n-TIaat3	5.9656	6.68646	8.73158	7.47206	-0.11825	-0.40899	-0.23696	-0.29074	-0.11871	0.17203
chr11	69038017	69038026	+	chr11	69037313	69038069	exon	n-TSaga4	24.2052	20.6183	41.2477	36.4283	0.2083	-0.71264	-0.54414	-0.92095	-0.75245	0.1685
chr19	37556384	37556393	-	chr19	37555922	37556666	exon	Exoc6	25.5655	18.9673	26.0876	22.9719	0.38707	-0.02662	0.14003	-0.41369	-0.24704	0.16665
chr8	4051617	4051626	-	chr8	4051055	4052911	NA	NA	2.85916	4.27124	5.37704	4.52821	-0.3389	-0.55793	-0.39284	-0.21903	-0.05394	0.16508
chr17	23550759	23550768	+	chr17	23550002	23551212	exon	6330415G19Rik	8.9568	7.84812	10.8434	9.40923	0.14719	-0.22039	-0.056	-0.36758	-0.20319	0.16439
chr15	79390705	79390714	+	chr15	79390395	79391112	5UTR	Tmem184b	2.64016	6.50675	4.49018	3.74623	-0.81238	-0.44548	-0.28249	0.3669	0.52989	0.16299
chr12	86687109	86687118	-	chr12	86686527	86687916	transcript	Vash1	2.23519	4.46795	7.99146	6.88691	-0.5599	-1.15215	-0.99123	-0.59225	-0.43133	0.16092
chr6	38961330	38961339	+	chr6	38960519	38961567	exon	Gm52859	1.38981	3.4299	5.93335	5.0463	-0.61169	-1.1217	-0.96083	-0.51001	-0.34914	0.16087
chr7	142395340	142395349	+	chr7	142394284	142396288	NA	NA	3.90239	2.37741	1.72044	1.27933	0.39436	0.60431	0.76463	0.20994	0.37027	0.16032
chrX	35952433	35952442	-	chrX	35951935	35953046	CDS	Dock11	2.05633	2.3312	2.2789	1.77969	-0.08499	-0.0692	0.09091	0.01579	0.1759	0.16011
chr10	62413299	62413308	-	chr10	62412980	62413963	CDS	Hkdc1	13.4735	16.2331	20.3253	17.9384	-0.23026	-0.51567	-0.35613	-0.28541	-0.12587	0.15954
chr13	21782417	21782426	-	chr13	21782295	21782988	3UTR	H3c11	37.947	27.86	38.8839	34.5637	0.41417	-0.03306	0.12611	-0.44723	-0.28806	0.15917
chr2	149284568	149284577	+	chr2	149283184	149284904	NA	NA	2.24598	2.04056	2.93473	2.36976	0.0642	-0.19652	-0.03735	-0.26072	-0.10155	0.15917
chr6	66271676	66271685	+	chr6	66271038	66272647	exon	Gm36408	11.1023	10.01	7.49746	6.46893	0.12102	0.44523	0.60229	0.32422	0.48128	0.15706
chr3	68493161	68493170	-	chr3	68493108	68494736	5UTR	Schip1	6.64837	5.68751	8.1337	7.04249	0.16058	-0.21764	-0.06102	-0.37822	-0.2216	0.15662
chr4	15300074	15300083	+	chr4	15299457	15300864	exon	Gm29829	11.9524	7.11789	9.79464	8.53577	0.58884	0.23374	0.38994	-0.3551	-0.1989	0.1562
chr12	77134457	77134466	+	chr12	77134038	77134847	NA	NA	3.13536	3.73279	3.60926	2.99823	-0.14602	-0.11702	0.03571	0.029	0.18173	0.15273
chr12	77134254	77134263	-	chr12	77134038	77134847	NA	NA	2.97952	2.35927	3.04522	2.49231	0.1742	-0.01728	0.13502	-0.19148	-0.03918	0.1523
chr3	60480603	60480612	+	chr3	60480351	60481198	5UTR	Mbnl1	4.31999	5.99347	6.29689	5.41998	-0.31769	-0.36848	-0.2165	-0.05079	0.10118	0.15198
chr2	152415062	152415071	+	chr2	152413475	152415422	CDS	Zcchc3	9.80368	4.57275	9.17305	8.01967	0.80104	0.07608	0.22653	-0.72496	-0.57451	0.15045
chr14	51088618	51088627	+	chr14	51088594	51089924	exon	n-TYgta10	16.6597	20.4913	18.9968	16.8918	-0.26334	-0.16626	-0.01739	0.09708	0.24595	0.14887
chr13	8849545	8849554	+	chr13	8849206	8850232	CDS	Wdr37	50.1711	35.0346	36.4949	32.6882	0.48908	0.43398	0.58228	-0.0551	0.0932	0.1483
chr4	101238838	101238847	+	chr4	101238721	101239937	exon	Gm52754	3.62223	6.30578	6.85285	5.94265	-0.52629	-0.6135	-0.46535	-0.08721	0.06094	0.14815
chr10	111583273	111583282	+	chr10	111583029	111584143	exon	Gm30262	3.48934	6.41173	7.33109	6.37466	-0.5754	-0.71745	-0.56937	-0.14205	0.00603	0.14808
chr19	47536922	47536931	-	chr19	47536591	47538327	transcript	Stn1	5.7739	4.88618	7.57253	6.6027	0.16429	-0.28461	-0.13815	-0.4489	-0.30244	0.14646
chr8	83743208	83743217	+	chr8	83742950	83743435	transcript	Gm46046	8.8286	19.4926	14.0479	12.4547	-0.95868	-0.54774	-0.40144	0.41094	0.55724	0.1463
chr4	117190221	117190230	+	chr4	117189312	117190654	exon	Gm25099	73.3545	90.5018	99.5274	89.6957	-0.29412	-0.42778	-0.28155	-0.13366	0.01256	0.14622
chr4	138367623	138367632	+	chr4	138367410	138369201	transcript	Cda	10.046	17.0325	11.1354	9.82781	-0.63973	-0.12037	0.02537	0.51936	0.6651	0.14574
chr6	5295015	5295024	-	chr6	5294824	5295256	CDS	Pon2	5.72003	6.69211	6.88044	5.98408	-0.16174	-0.19109	-0.04576	-0.02934	0.11598	0.14533
chr5	122133520	122133529	+	chr5	122132937	122133857	5UTR	Ccdc63	8.78975	9.60103	15.8998	14.1481	-0.10034	-0.70598	-0.56143	-0.60564	-0.46109	0.14455
chr16	8823853	8823862	-	chr16	8823105	8824158	NA	NA	2.47678	6.28429	4.4341	3.77857	-0.82304	-0.48066	-0.33682	0.34238	0.48622	0.14385
chr4	6294125	6294134	-	chr4	6292145	6294251	NA	NA	3.93804	3.70524	4.27515	3.63522	0.05336	-0.07393	0.0698	-0.12728	0.01644	0.14373
chr11	97776366	97776375	+	chr11	97775733	97777520	transcript	1700001P01Rik	3.44265	3.82159	3.07589	2.54976	-0.08957	0.09233	0.23603	0.18189	0.3256	0.1437
chr7	45233360	45233369	-	chr7	45232919	45233902	transcript	Tead2	2.08028	4.49826	4.72365	4.04208	-0.61444	-0.66035	-0.51682	-0.0459	0.09763	0.14353
chr18	36360995	36361004	+	chr18	36360458	36361549	NA	NA	8.92963	9.89935	9.65229	8.50484	-0.11775	-0.08865	0.05477	0.0291	0.17252	0.14342
chr10	128645867	128645876	-	chr10	128645032	128646816	5UTR	Ikzf4	4.14914	9.85341	12.556	11.1444	-0.89632	-1.1823	-1.04001	-0.28598	-0.14369	0.14229
chr17	27574979	27574988	+	chr17	27574711	27575459	3UTR	Nudt3	6.76665	2.98552	5.48257	4.73732	0.75926	0.21586	0.35775	-0.5434	-0.40151	0.14189
chr7	16240630	16240639	+	chr7	16239482	16241273	5UTR	C5ar2	17.986	22.918	35.7649	32.1901	-0.31158	-0.90225	-0.76065	-0.59067	-0.44907	0.1416
chr11	109556539	109556548	-	chr11	109556035	109556961	CDS	Arsg	4.51959	3.63604	5.07948	4.37347	0.19486	-0.11111	0.03046	-0.30598	-0.1644	0.14158
chr11	60774957	60774966	-	chr11	60774836	60775254	CDS	Top3a	3.84182	7.07168	9.07862	8.01185	-0.59591	-0.87122	-0.73144	-0.27531	-0.13553	0.13978
chr7	81773301	81773310	+	chr7	81773204	81773846	transcript	Ramac	6.02319	5.08764	6.052	5.26582	0.16829	-0.00488	0.13469	-0.17318	-0.0336	0.13958
chr7	103827357	103827366	+	chr7	103827198	103828263	CDS	Hbb-bs	3.28925	2.35431	4.16994	3.55808	0.25538	-0.20517	-0.06578	-0.46055	-0.32116	0.13939
chr19	8728882	8728891	+	chr19	8728425	8729179	transcript	Snhg1	2.8016	4.61106	5.21244	4.51294	-0.42547	-0.54301	-0.40535	-0.11754	0.02012	0.13766
chr19	55563538	55563547	-	chr19	55562442	55563592	NA	NA	2.39647	2.326	3.86131	3.28803	0.02103	-0.37938	-0.24253	-0.40041	-0.26356	0.13685
chr8	122303130	122303139	-	chr8	122302855	122303249	NA	NA	5.10288	3.73096	4.40816	3.7861	0.2882	0.13875	0.27543	-0.14945	-0.01276	0.13668
chr15	97830448	97830457	-	chr15	97830229	97830493	exon	Gm33636	4.35667	8.42143	7.63179	6.71854	-0.67365	-0.56511	-0.42846	0.10854	0.2452	0.13665
chr3	52788407	52788416	-	chr3	52787419	52788775	exon	Gm30292	2.28994	2.99487	2.18871	1.76931	-0.1991	0.03099	0.16698	0.23009	0.36608	0.13599
chr7	25386393	25386402	-	chr7	25385814	25386763	transcript	4732471J01Rik	16.4514	24.0184	31.3822	28.3445	-0.48526	-0.83911	-0.70348	-0.35385	-0.21822	0.13563
chrX	36716049	36716058	-	chrX	36714886	36716136	NA	NA	1.7802	2.475	3.02584	2.53377	-0.21827	-0.37053	-0.2353	-0.15226	-0.01703	0.13523
chr17	32108802	32108811	-	chr17	32107820	32109102	exon	Gm30729	7.75582	10.1052	12.9624	11.5915	-0.29827	-0.59357	-0.4594	-0.2953	-0.16113	0.13417
chr5	97010260	97010269	+	chr5	97009675	97010413	NA	NA	8.37939	11.2407	8.45646	7.49812	-0.33758	-0.01021	0.12218	0.32737	0.45976	0.13239
chr4	40801239	40801248	-	chr4	40800944	40801485	3UTR	B4galt1	2.28286	3.98413	4.16468	3.5841	-0.44114	-0.48092	-0.34888	-0.03978	0.09226	0.13204
chr15	81891277	81891286	+	chr15	81890928	81891704	CDS	Aco2	3.25713	7.5467	7.21424	6.3695	-0.80613	-0.75745	-0.62583	0.04868	0.1803	0.13162
chr2	156324219	156324228	-	chr2	156323510	156325112	exon	Gm14251	11.6392	12.2622	18.3528	16.5452	-0.06232	-0.56142	-0.43043	-0.49909	-0.36811	0.13099
chr11	76286825	76286834	-	chr11	76286286	76287293	NA	NA	1.11092	4.02866	8.89071	7.9138	-0.85916	-1.66465	-1.53498	-0.80549	-0.67582	0.12968
chr12	77056907	77056916	-	chr12	77056641	77057461	NA	NA	7.7567	9.24586	9.84697	8.8026	-0.19606	-0.26822	-0.14043	-0.07216	0.05563	0.12779
chr9	108036425	108036434	-	chr9	108035184	108036739	CDS	Ip6k1	1.04798	3.67265	3.47654	2.98072	-0.80348	-0.7567	-0.63117	0.04678	0.17231	0.12552
chr17	46138996	46139005	-	chr17	46138533	46139755	transcript	Rsph9	21.0132	33.6465	28.2625	25.7538	-0.62095	-0.38808	-0.26525	0.23287	0.3557	0.12284
chr19	45615262	45615271	+	chr19	45614951	45616294	transcript	Fbxw4	2.42182	3.45433	4.09564	3.56594	-0.27609	-0.42429	-0.303	-0.1482	-0.02691	0.12129
chr3	9808097	9808106	+	chr3	9807669	9808680	exon	Pag1	5.06393	8.35414	5.53459	4.88944	-0.52257	-0.08738	0.03379	0.43518	0.55636	0.12117
chr16	8678121	8678130	-	chr16	8677867	8679196	NA	NA	24.9685	17.5106	18.87	17.1642	0.45753	0.36259	0.48276	-0.09494	0.02523	0.12017
chr10	84852814	84852823	-	chr10	84852262	84853713	exon	Gm40728	4.06363	5.93191	5.32504	4.7029	-0.36265	-0.25454	-0.1346	0.10811	0.22805	0.11994
chr7	126765964	126765973	-	chr7	126765407	126766007	transcript	Mapk3	3.20192	3.08619	3.28623	2.83208	0.02972	-0.02127	0.09721	-0.051	0.06749	0.11849
chr8	22144314	22144323	-	chr8	22143681	22144532	transcript	Nek3	21.0045	26.2079	15.7431	14.3182	-0.2888	0.36605	0.48356	0.65485	0.77236	0.11751
chr8	23053440	23053449	+	chr8	23053393	23054828	NA	NA	9.18996	8.31825	8.35092	7.52139	0.11207	0.1077	0.22273	-0.00436	0.11066	0.11503
chr17	35820277	35820286	+	chr17	35820112	35820520	NA	NA	8.86472	8.21131	7.08168	6.35331	0.08563	0.24684	0.36123	0.1612	0.27559	0.11439
chr1	21333816	21333825	+	chr1	21332875	21334549	NA	NA	4.5892	6.40923	7.55143	6.79001	-0.33078	-0.50529	-0.39133	-0.17451	-0.06055	0.11396
chr19	53801772	53801781	-	chr19	53801488	53802658	transcript	Rbm20	7.64199	5.57973	6.28448	5.62204	0.32892	0.20789	0.32136	-0.12103	-0.00756	0.11347
chr4	40870431	40870440	-	chr4	40870051	40870845	NA	NA	1.73375	4.4981	4.47477	3.94988	-0.7286	-0.72376	-0.61044	0.00484	0.11815	0.11332
chr17	74843684	74843693	-	chr17	74843396	74844101	CDS	Ttc27	15.9928	8.4144	6.83906	6.14075	0.76216	0.98763	1.10009	0.22547	0.33792	0.11245
chr14	66210590	66210599	-	chr14	66209978	66211679	CDS	Ptk2b	6.50829	2.85385	5.99528	5.36825	0.75357	0.08485	0.19582	-0.66872	-0.55775	0.11098
chr4	128669047	128669056	-	chr4	128668691	128669655	NA	NA	0.60075	2.1423	1.40477	1.11911	-0.58633	-0.33517	-0.22479	0.25116	0.36154	0.11038
chr11	97052307	97052316	+	chr11	97050216	97052734	exon	Osbpl7	22.1734	17.1757	17.439	15.9748	0.32693	0.30773	0.41792	-0.0192	0.09099	0.11019
chr2	103299201	103299210	-	chr2	103298559	103299605	CDS	Ehf	2.99974	5.60965	3.70488	3.25445	-0.56251	-0.17483	-0.06562	0.38768	0.49689	0.10921
chr13	74733978	74733987	+	chr13	74733657	74734402	CDS	Cast	10.8299	7.64024	8.06735	7.29918	0.39548	0.3358	0.44497	-0.05967	0.04949	0.10916
chr1	34435135	34435144	+	chr1	34434646	34435186	exon	n-TEttc1	17.8599	12.4607	19.4141	17.8534	0.44523	-0.10626	0.00046	-0.55149	-0.44477	0.10672
chr3	10203020	10203029	+	chr3	10202806	10203307	3UTR	Fabp4	2.73045	9.71745	6.25786	5.65098	-1.22811	-0.74659	-0.64266	0.48153	0.58546	0.10393
chr2	128251006	128251015	+	chr2	128250300	128251728	NA	NA	4.21892	10.6527	10.8463	9.92609	-0.97184	-0.99296	-0.88968	-0.02113	0.08216	0.10328
chr15	59482018	59482027	+	chr15	59481859	59482456	NA	NA	4.53953	5.23043	4.42422	3.9519	-0.13555	0.02392	0.12625	0.15947	0.2618	0.10233
chr11	119133939	119133948	-	chr11	119133650	119135213	3UTR	Tbc1d16	2.1554	8.85495	9.43315	8.62034	-1.29119	-1.363	-1.26099	-0.07182	0.03019	0.10201
chr8	22143758	22143767	-	chr8	22143681	22144532	transcript	Nek3	2.66403	2.00388	1.94214	1.64873	0.19841	0.21845	0.31764	0.02003	0.11923	0.09919
chr9	35200756	35200765	-	chr9	35199284	35201095	5UTR	Tirap	10.4625	8.04829	8.62895	7.89352	0.298	0.22051	0.31938	-0.0775	0.02138	0.09888
chr17	43025567	43025576	-	chr17	43024710	43025636	exon	Tnfrsf21	1.68093	3.84439	2.84021	2.4897	-0.60478	-0.35506	-0.25661	0.24972	0.34816	0.09845
chr3	89821358	89821367	-	chr3	89819916	89822228	exon	Gm8969	2.00144	5.19155	4.92019	4.43346	-0.77641	-0.72441	-0.62617	0.052	0.15024	0.09824
chr5	135657961	135657970	+	chr5	135657529	135658332	NA	NA	26.8477	31.2469	23.638	21.9241	-0.20167	0.16726	0.26521	0.36894	0.46688	0.09795
chr15	12896366	12896375	-	chr15	12895432	12896879	CDS	Drosha	26.2325	31.4488	29.8284	27.7245	-0.24088	-0.17026	-0.0731	0.07062	0.16778	0.09717
chr16	58455007	58455016	-	chr16	58453851	58455556	CDS	Dcbld2	13.0239	19.5552	16.822	15.5822	-0.50735	-0.31624	-0.22043	0.19111	0.28692	0.09581
chr2	150666133	150666142	+	chr2	150665574	150666436	CDS	Acss1	28.1538	32.9523	30.9503	28.8034	-0.20998	-0.12606	-0.03028	0.08393	0.1797	0.09577
chr1	64798442	64798451	-	chr1	64796882	64798470	NA	NA	2.51154	0.75474	2.68443	2.35843	0.62684	-0.04919	0.045	-0.67602	-0.58183	0.09419
chr6	137557735	137557744	-	chr6	137556534	137558189	transcript	Eps8	1.71474	2.0208	1.91032	1.63448	-0.10175	-0.06584	0.02791	0.03591	0.12966	0.09376
chr14	30512976	30512985	+	chr14	30512583	30513554	CDS	Dcp1a	13.4553	11.7252	11.2345	10.3796	0.16588	0.21661	0.30951	0.05074	0.14363	0.0929
chr2	155605268	155605277	-	chr2	155604521	155605532	NA	NA	6.84775	6.39663	9.75615	8.9963	0.07157	-0.39178	-0.29924	-0.46335	-0.37081	0.09254
chr1	82824519	82824528	+	chr1	82824075	82824636	exon	Gm34450	2.87589	2.13109	2.65856	2.34454	0.2163	0.05983	0.15092	-0.15646	-0.06537	0.09109
chr14	99306074	99306083	-	chr14	99306017	99307294	transcript	Klf5	2.97618	3.07876	3.01267	2.68903	-0.0269	-0.00963	0.07809	0.01728	0.10499	0.08772
chr3	52788467	52788476	+	chr3	52787419	52788775	exon	Gm30292	2.84354	2.00183	3.45165	3.10265	0.24862	-0.15622	-0.06864	-0.40485	-0.31727	0.08758
chr19	53802514	53802523	+	chr19	53801488	53802658	transcript	Rbm20	18.8537	12.6801	11.83	10.9888	0.49303	0.57632	0.66376	0.08329	0.17073	0.08744
chr9	15316790	15316799	-	chr9	15316297	15316900	exon	LOC115487281	2.85422	4.90527	5.2042	4.75761	-0.46985	-0.52715	-0.44069	-0.05729	0.02916	0.08646
chr1	195100803	195100812	+	chr1	195100648	195101235	3UTR	Cr1l	3.15834	2.91578	3.43231	3.09461	0.06351	-0.06853	0.01642	-0.13204	-0.04709	0.08495
chr10	42480942	42480951	+	chr10	42480765	42481053	NA	NA	15.6147	22.9724	25.584	23.9876	-0.49238	-0.63333	-0.54882	-0.14095	-0.05644	0.08451
chr11	5574056	5574065	-	chr11	5573585	5574472	CDS	Ankrd36	49.9271	29.9596	35.9409	33.7639	0.69212	0.44793	0.5321	-0.24418	-0.16001	0.08417
chr4	107803104	107803113	+	chr4	107802824	107804215	5UTR	Lrp8	9.32813	9.65216	11.6752	10.8754	-0.03908	-0.26168	-0.17773	-0.2226	-0.13866	0.08394
chr1	91454028	91454037	-	chr1	91453860	91454825	exon	Gm35591	11.1485	8.73691	12.8859	12.0271	0.2811	-0.17319	-0.09017	-0.45428	-0.37127	0.08302
chr1	36090352	36090361	-	chr1	36090329	36091693	transcript	Hs6st1	6.35457	6.10313	7.24529	6.71936	0.04169	-0.13868	-0.05841	-0.18036	-0.1001	0.08026
chr3	96359528	96359537	+	chr3	96359152	96360751	exon	Rnu1b1	1.34729	2.13564	2.44918	2.1845	-0.27062	-0.36556	-0.28583	-0.09494	-0.01521	0.07973
chr13	112122905	112122914	-	chr13	112122870	112123797	NA	NA	0.70342	1.6854	1.96979	1.73095	-0.38856	-0.48398	-0.40427	-0.09542	-0.01571	0.07971
chr7	80375484	80375493	+	chr7	80375286	80375844	3UTR	Fes	5.37373	8.88599	12.7324	11.9165	-0.53364	-0.95437	-0.8748	-0.42073	-0.34117	0.07957
chr1	182108612	182108621	-	chr1	182108302	182109178	transcript	Gm39719	1.96048	2.4015	4.18923	3.83187	-0.1368	-0.5875	-0.50797	-0.4507	-0.37117	0.07953
chr11	97446388	97446397	-	chr11	97445880	97446910	5UTR	Arhgap23	77.4299	70.0824	62.2392	58.8116	0.13916	0.30421	0.38272	0.16505	0.24356	0.07851
chr1	136445608	136445617	+	chr1	136445607	136446634	transcript	Ddx59	3.19229	2.62703	2.87365	2.5917	0.15163	0.08351	0.16165	-0.06812	0.01003	0.07815
chr11	49084090	49084099	-	chr11	49083822	49084442	exon	Gm12188	23.9487	16.3666	18.3073	17.2153	0.48794	0.3465	0.42437	-0.14144	-0.06357	0.07788
chr3	137977784	137977793	+	chr3	137977260	137977879	CDS	Dapp1	6.6899	6.3118	8.47609	7.91454	0.06079	-0.25692	-0.18097	-0.31771	-0.24176	0.07595
chr16	91823020	91823029	+	chr16	91822529	91823498	CDS	Itsn1	29.6094	21.231	21.2433	20.0393	0.43664	0.43589	0.51105	-0.00075	0.07441	0.07516
chr14	61656120	61656129	-	chr14	61656097	61657361	NA	NA	1.76426	2.24371	3.02277	2.75217	-0.15463	-0.37514	-0.30231	-0.22051	-0.14768	0.07284
chr3	19635533	19635542	-	chr3	19634500	19635894	exon	n-TAagc14	2.65509	2.273	2.54937	2.3105	0.1117	0.03005	0.10034	-0.08165	-0.01135	0.07029
chr15	53224843	53224852	+	chr15	53224183	53225920	NA	NA	4.64678	2.51014	2.83264	2.58292	0.51472	0.42426	0.49381	-0.09046	-0.02092	0.06954
chr16	21779301	21779310	-	chr16	21778169	21779656	CDS	Ehhadh	2.55651	2.27528	3.86849	3.58138	0.083	-0.33437	-0.26753	-0.41737	-0.35053	0.06684
chr13	94537609	94537618	+	chr13	94537189	94538166	CDS	Ap3b1	4.47604	4.16416	4.01595	3.72657	0.06624	0.09882	0.16463	0.03258	0.09839	0.06581
chr15	44457723	44457732	-	chr15	44457280	44458439	exon	Pkhd1l1	8.13992	11.493	10.1999	9.64236	-0.39608	-0.25591	-0.19101	0.14017	0.20507	0.0649
chr18	77806703	77806712	+	chr18	77806037	77807128	NA	NA	40.2999	22.8619	26.2462	25.0074	0.75556	0.57467	0.63828	-0.18089	-0.11728	0.06361
chr1	180818189	180818198	+	chr1	180818043	180818368	NA	NA	16.2961	26.1302	13.7139	13.0252	-0.6078	0.21352	0.27625	0.82133	0.88405	0.06272
chr9	77955192	77955201	+	chr9	77954477	77956270	transcript	Elovl5	1.37205	2.17746	2.3721	2.17252	-0.27433	-0.33348	-0.2728	-0.05915	0.00153	0.06068
chr16	20704080	20704089	-	chr16	20703333	20704658	CDS	Clcn2	8.18318	11.0998	12.6402	12.0311	-0.34901	-0.5041	-0.44475	-0.15508	-0.09574	0.05934
chr2	60003084	60003093	-	chr2	60002786	60003991	CDS	Baz2b	2.35634	3.83314	4.09133	3.82746	-0.38489	-0.44277	-0.38359	-0.05788	0.0013	0.05918
chr13	111655943	111655952	-	chr13	111655302	111657637	NA	NA	1.64772	4.15827	5.24134	4.93874	-0.68631	-0.90454	-0.84682	-0.21824	-0.16051	0.05773
chr2	49336870	49336879	+	chr2	49336457	49337816	NA	NA	2.22025	3.72583	3.68508	3.45013	-0.40136	-0.39185	-0.33573	0.00951	0.06563	0.05612
chr5	72759069	72759078	-	chr5	72758608	72759926	CDS	Tec	4.51965	13.2831	7.04995	6.68911	-1.17193	-0.44554	-0.38981	0.72639	0.78212	0.05572
chr4	32291552	32291561	-	chr4	32291371	32292050	transcript	Bach2	1.10795	1.90888	2.21076	2.03454	-0.29116	-0.38727	-0.33195	-0.0961	-0.04078	0.05532
chr1	85580302	85580311	+	chr1	85579555	85580959	CDS	Sp110	8.12769	4.60539	8.01045	7.62509	0.58262	0.01604	0.07007	-0.56658	-0.51255	0.05403
chr7	113820078	113820087	+	chr7	113820062	113820560	NA	NA	2.45913	3.89569	2.89918	2.70307	-0.36874	-0.12328	-0.06964	0.24546	0.29911	0.05364
chr12	84918055	84918064	+	chr12	84916868	84918922	3UTR	Arel1	17.4721	19.0016	20.1664	19.3504	-0.1066	-0.18279	-0.12984	-0.0762	-0.02324	0.05296
chr16	17148350	17148359	-	chr16	17146660	17148465	CDS	Ydjc	26.174	35.3325	29.2729	28.1358	-0.4002	-0.14818	-0.09556	0.25202	0.30464	0.05262
chr17	94748729	94748738	+	chr17	94748484	94748781	exon	Mettl4	4.1241	5.41898	5.3338	5.06345	-0.25853	-0.24288	-0.19204	0.01565	0.0665	0.05084
chr17	48418055	48418064	-	chr17	48417211	48418659	transcript	Oard1	4.01219	3.09393	3.64342	3.43233	0.22024	0.08445	0.13512	-0.13579	-0.08513	0.05066
chr1	40361240	40361249	+	chr1	40361034	40361329	CDS	Il1rl2	7.08612	6.76012	5.55784	5.28848	0.05006	0.25131	0.30052	0.20125	0.25047	0.04922
chr18	61704916	61704925	-	chr18	61704886	61705477	CDS	Pcyox1l	5.60722	8.16708	6.22759	5.943	-0.39702	-0.10671	-0.05874	0.2903	0.33828	0.04798
chr13	49358395	49358404	-	chr13	49358211	49359267	NA	NA	3.52716	6.82666	5.23164	4.98406	-0.63212	-0.36069	-0.31358	0.27143	0.31855	0.04712
chr17	34218941	34218950	-	chr17	34218225	34219440	transcript	Tap2	5.5014	9.52237	15.5408	14.9741	-0.58899	-1.17559	-1.12948	-0.5866	-0.54049	0.04611
chr8	10990610	10990619	+	chr8	10990471	10991739	transcript	Irs2	4.05411	4.65122	5.30238	5.06126	-0.12628	-0.25245	-0.207	-0.12617	-0.08073	0.04544
chr4	107172274	107172283	-	chr4	107171833	107172874	5UTR	Tceanc2	1.0472	1.91632	1.68415	1.55586	-0.31829	-0.2399	-0.19468	0.07839	0.12361	0.04522
chr11	11571284	11571293	-	chr11	11569311	11571665	transcript	Gm11998	4.69583	4.81051	5.57808	5.33282	-0.02289	-0.16743	-0.1228	-0.14454	-0.09991	0.04463
chr1	82374189	82374198	-	chr1	82373303	82374474	CDS	Rhbdd1	7.24174	11.0076	6.86451	6.58061	-0.47261	0.05713	0.10168	0.52974	0.57428	0.04454
chr2	152741611	152741620	-	chr2	152741395	152742269	exon	Id1	3.94896	7.34627	8.57112	8.23588	-0.61255	-0.78213	-0.73767	-0.16958	-0.12511	0.04447
chr19	32264090	32264099	-	chr19	32263574	32264760	transcript	Sgms1	5.32226	12.9669	12.9265	12.4783	-0.98594	-0.98216	-0.93954	0.00378	0.0464	0.04261
chr6	129230093	129230102	+	chr6	129229487	129230795	transcript	Gm38906	6.90623	7.54972	5.85322	5.61889	-0.09573	0.1718	0.21298	0.26752	0.3087	0.04118
chr12	85337728	85337737	-	chr12	85337477	85338174	CDS	Nek9	23.0737	18.7831	19.6063	18.9948	0.26525	0.21044	0.25096	-0.05481	-0.01429	0.04052
chr2	167505404	167505413	-	chr2	167505054	167505863	transcript	Rnf114	20.3947	27.4405	31.841	30.9347	-0.38747	-0.58547	-0.54686	-0.198	-0.15938	0.03861
chr14	21806817	21806826	-	chr14	21806369	21807269	transcript	Samd8	31.6642	31.9419	27.7399	26.945	-0.01169	0.17618	0.21464	0.18787	0.22633	0.03846
chr16	32689050	32689059	+	chr16	32688801	32689346	transcript	Tnk2	3.00798	4.56777	5.72821	5.5127	-0.36126	-0.58135	-0.54293	-0.22009	-0.18167	0.03841
chr2	91027874	91027883	-	chr2	91026328	91028357	3UTR	Gm13777	18.8033	12.8863	11.6044	11.246	0.47012	0.59585	0.63305	0.12573	0.16293	0.0372
chr2	153724651	153724660	+	chr2	153724306	153725256	NA	NA	35.4485	35.9263	31.6462	30.7806	-0.01807	0.15243	0.1895	0.17049	0.20757	0.03708
chr1	21332894	21332903	-	chr1	21332875	21334549	NA	NA	3.27559	2.64549	2.86881	2.73693	0.16747	0.10587	0.14193	-0.0616	-0.02554	0.03606
chr9	100962928	100962937	+	chr9	100962925	100963858	transcript	Stag1	1.27876	2.4661	2.58093	2.45678	-0.39662	-0.42978	-0.3939	-0.03315	0.00272	0.03588
chr10	82790869	82790878	-	chr10	82790491	82790992	NA	NA	1.17684	1.89657	1.97011	1.86122	-0.25962	-0.28369	-0.2479	-0.02408	0.01172	0.03579
chr7	80342009	80342018	+	chr7	80341814	80342121	transcript	Unc45a	16.7192	22.2561	17.2169	16.7469	-0.36568	-0.03693	-0.00208	0.32875	0.3636	0.03485
chr1	133729161	133729170	+	chr1	133727547	133729230	transcript	Atp2b4	2.28854	3.44354	4.20393	4.04635	-0.31329	-0.4877	-0.45325	-0.17441	-0.13996	0.03445
chr1	151216561	151216570	+	chr1	151215690	151216870	NA	NA	3.02036	1.81279	3.48848	3.35822	0.35808	-0.11797	-0.0861	-0.47605	-0.44418	0.03187
chr11	116308297	116308306	+	chr11	116307161	116308561	exon	Gm26730	16.4282	16.6399	10.626	10.3785	-0.01606	0.529	0.55653	0.54506	0.57259	0.02753
chr12	69791442	69791451	+	chr12	69790257	69791940	5UTR	Cdkl1	3.0749	2.2986	4.51649	4.38479	0.21744	-0.33321	-0.30577	-0.55065	-0.52321	0.02744
chr13	94427797	94427806	-	chr13	94426835	94428144	CDS	Ap3b1	5.85509	7.9544	7.52288	7.34275	-0.3243	-0.26333	-0.2371	0.06097	0.0872	0.02623
chr1	183227780	183227789	+	chr1	183227212	183227934	NA	NA	12.1533	10.3144	8.37122	8.17592	0.19384	0.43162	0.45784	0.23778	0.264	0.02622
chr19	35127541	35127550	+	chr19	35126205	35127687	NA	NA	1.53972	2.39198	2.2804	2.19652	-0.27781	-0.24434	-0.21866	0.03347	0.05915	0.02568
chr1	170845996	170846005	-	chr1	170845029	170846336	CDS	Atf6	10.6192	21.0504	16.8379	16.4982	-0.84536	-0.56068	-0.53509	0.28467	0.31027	0.0256
chr12	105019383	105019392	+	chr12	105019328	105020325	transcript	Gm46375	9.17672	11.4044	10.2643	10.0423	-0.25243	-0.12876	-0.10339	0.12367	0.14904	0.02537
chr4	116481496	116481505	+	chr4	116481244	116481868	NA	NA	10.8447	21.2651	15.8618	15.5439	-0.83383	-0.46122	-0.43599	0.37261	0.39784	0.02523
chr16	58662129	58662138	-	chr16	58661591	58663374	exon	Gm41464	28.9129	28.0663	27.0769	26.6263	0.03945	0.08696	0.10913	0.04751	0.06968	0.02217
chr7	81706440	81706449	+	chr7	81706155	81707253	CDS	Homer2	1.79242	2.17677	3.41526	3.32855	-0.12445	-0.4651	-0.44369	-0.34064	-0.31924	0.0214
chr2	158142397	158142406	+	chr2	158141568	158142647	CDS	Tgm2	17.654	10.9623	10.7471	10.5773	0.58308	0.60637	0.62503	0.02329	0.04195	0.01866
chr10	93707763	93707772	+	chr10	93707222	93707959	CDS	Ntn4	3.23295	2.12974	2.97084	2.90559	0.30994	0.06783	0.08523	-0.2421	-0.22471	0.01739
chr13	97680378	97680387	-	chr13	97680066	97681170	NA	NA	6.04978	6.57726	7.14674	7.03745	-0.08663	-0.17466	-0.15818	-0.08803	-0.07155	0.01648
chr1	59901683	59901692	-	chr1	59901204	59902250	NA	NA	2.96559	2.70145	2.58734	2.53179	0.07182	0.10399	0.11991	0.03217	0.04809	0.01592
chr13	97680667	97680676	-	chr13	97680066	97681170	NA	NA	3.65315	2.61896	3.62222	3.55621	0.26673	0.0073	0.02301	-0.25943	-0.24372	0.01571
chr13	23309588	23309597	+	chr13	23309288	23309818	exon	n-TIaat9	4.71808	6.91495	7.21164	7.11546	-0.38457	-0.42946	-0.41506	-0.04489	-0.03049	0.0144
chr11	11811982	11811991	+	chr11	11811878	11812268	3UTR	Ddc	17.9158	26.8089	28.9085	28.6221	-0.52222	-0.62212	-0.60889	-0.0999	-0.08668	0.01323
chr4	45391667	45391676	+	chr4	45390781	45391779	3UTR	Slc25a51	3.34289	4.67506	6.36189	6.29495	-0.29752	-0.60316	-0.59219	-0.30564	-0.29466	0.01097
chr11	68899276	68899285	+	chr11	68898640	68899439	transcript	Rnf222	12.7043	11.7456	13.1131	12.9975	0.09413	-0.03835	-0.02761	-0.13248	-0.12174	0.01074
chr5	146845048	146845057	+	chr5	146844223	146845558	5UTR	Rasl11a	10.3591	27.5772	27.468	27.2493	-1.22758	-1.22233	-1.21175	0.00525	0.01583	0.01058
chr11	80767464	80767473	-	chr11	80766202	80767642	NA	NA	10.4529	9.86116	7.38286	7.31298	0.0676	0.39118	0.40145	0.32359	0.33385	0.01026
chr14	16256347	16256356	+	chr14	16255499	16256707	CDS	Ngly1	4.60553	7.29225	8.46806	8.39655	-0.46417	-0.62819	-0.61873	-0.16401	-0.15455	0.00946
chr3	153832198	153832207	-	chr3	153831062	153832722	exon	Gm25757	42.6045	38.9509	40.2577	39.9813	0.12194	0.07713	0.08649	-0.04481	-0.03545	0.00936
chr7	102010168	102010177	-	chr7	102009702	102010506	CDS	Numa1	12.8559	7.98643	5.40628	5.3785	0.55142	0.96006	0.96516	0.40864	0.41374	0.0051
chr13	45512189	45512198	-	chr13	45511764	45513829	5UTR	Gmpr	30.2089	22.3688	28.7544	28.6635	0.39572	0.06568	0.06988	-0.33004	-0.32583	0.00421
chr18	62525835	62525844	-	chr18	62525578	62526211	5UTR	Fbxo38	5.0777	7.18887	8.5033	8.48297	-0.35567	-0.53967	-0.537	-0.18401	-0.18133	0.00267
chr2	26013721	26013730	+	chr2	26012961	26014701	5UTR	Ubac1	33.6812	22.5022	20.0052	19.9707	0.53366	0.68563	0.68784	0.15197	0.15418	0.00221
chr4	86853300	86853309	-	chr4	86852918	86853396	3UTR	Rps6	2.84029	3.98531	3.757	3.7517	-0.28152	-0.2296	-0.22837	0.05192	0.05315	0.00123
chr1	55107263	55107272	-	chr1	55106905	55107654	NA	NA	1.89481	3.52477	3.39959	3.39569	-0.45746	-0.42703	-0.42608	0.03043	0.03138	0.00096
chr17	48418496	48418505	+	chr17	48417211	48418659	transcript	Oard1	3.85999	5.79941	7.1584	7.152	-0.38539	-0.60481	-0.60385	-0.21942	-0.21846	0.00096
chr17	12118513	12118522	+	chr17	12118149	12120031	5UTR	Agpat4	4.29389	2.29729	3.71296	3.70894	0.50436	0.12948	0.13042	-0.37488	-0.37394	0.00094
chr12	77134429	77134438	+	chr12	77134038	77134847	NA	NA	3.93275	4.25572	3.59166	3.60061	-0.07096	0.07893	0.07681	0.14989	0.14776	-0.00213
chr9	78477316	78477325	+	chr9	78475936	78477830	3UTR	Eef1a1	13.4508	23.8907	24.3747	24.4204	-0.72735	-0.75359	-0.75605	-0.02625	-0.0287	-0.00246
chr4	40870463	40870472	-	chr4	40870051	40870845	NA	NA	1.52498	2.90356	3.05545	3.07585	-0.42735	-0.46754	-0.47285	-0.04019	-0.0455	-0.00531
chr19	35127331	35127340	+	chr19	35126205	35127687	NA	NA	1.95494	1.61556	1.86152	1.87783	0.11503	0.03076	0.02534	-0.08427	-0.08968	-0.00542
chr4	121022214	121022223	-	chr4	121022035	121022520	NA	NA	7.4769	9.82199	7.97196	8.01263	-0.3053	-0.07005	-0.07565	0.23525	0.22964	-0.00561
chr16	58661674	58661683	+	chr16	58661591	58663374	exon	Gm41464	3.97578	2.40505	3.27208	3.30177	0.40268	0.16668	0.15925	-0.23599	-0.24343	-0.00744
chr10	81152364	81152373	-	chr10	81152337	81153082	transcript	Zbtb7a	2.88619	2.38876	3.72062	3.75333	0.14052	-0.20875	-0.21634	-0.34926	-0.35686	-0.0076
chr1	39482201	39482210	-	chr1	39481992	39482955	NA	NA	3.00334	3.68623	3.66062	3.69749	-0.16952	-0.16351	-0.17215	0.00601	-0.00263	-0.00865
chr5	96951772	96951781	-	chr5	96951213	96952514	NA	NA	18.6592	14.47	16.3963	16.5126	0.31875	0.1634	0.15453	-0.15535	-0.16422	-0.00887
chr10	108033706	108033715	+	chr10	108033140	108034261	NA	NA	11.6549	16.0814	17.9451	18.0769	-0.3932	-0.53128	-0.54056	-0.13808	-0.14736	-0.00928
chr14	47520966	47520975	+	chr14	47520770	47521244	transcript	Fbxo34	8.48635	7.91204	5.99247	6.04761	0.07765	0.37248	0.36311	0.29483	0.28546	-0.00937
chr4	15300231	15300240	-	chr4	15299457	15300864	exon	Gm29829	17.9122	16.7961	13.2276	13.341	0.08124	0.37669	0.36631	0.29546	0.28508	-0.01038
chr14	61419385	61419394	-	chr14	61418219	61420489	NA	NA	3.18086	3.12404	3.13356	3.1768	0.01457	0.01212	0.00104	-0.00245	-0.01353	-0.01108
chr7	80146240	80146249	-	chr7	80145761	80146753	NA	NA	14.6245	17.062	14.1944	14.3434	-0.19228	0.03675	0.02391	0.22903	0.21619	-0.01284
chr5	127755993	127756002	+	chr5	127755941	127756413	NA	NA	2.87099	2.82895	2.54846	2.59384	0.01139	0.0898	0.07682	0.07841	0.06543	-0.01298
chr10	127521789	127521798	-	chr10	127521280	127522607	CDS	Shmt2	15.7606	20.2513	22.3388	22.566	-0.31763	-0.44441	-0.45756	-0.12678	-0.13994	-0.01315
chr9	122348056	122348065	+	chr9	122347918	122348322	NA	NA	15.0584	12.3239	10.2568	10.3854	0.24464	0.46171	0.44722	0.21707	0.20258	-0.01449
chr13	23542670	23542679	+	chr13	23542667	23543041	3UTR	H2bc9	5.71888	7.40224	5.50959	5.59321	-0.2696	0.03733	0.0223	0.30694	0.2919	-0.01503
chr16	10725259	10725268	+	chr16	10724998	10725683	NA	NA	1.99519	1.19663	2.18428	2.23407	0.28401	-0.05979	-0.07513	-0.3438	-0.35914	-0.01534
chr10	43291786	43291795	+	chr10	43290533	43292105	NA	NA	2.61682	3.21418	3.50709	3.57969	-0.16008	-0.23253	-0.24993	-0.07245	-0.08985	-0.01741
chr5	103774850	103774859	-	chr5	103774723	103775450	transcript	Aff1	3.72134	3.16466	5.30442	5.40843	0.13584	-0.32831	-0.34748	-0.46415	-0.48332	-0.01916
chr3	97930273	97930282	+	chr3	97928987	97930760	5UTR	Gm5544	5.35207	5.46991	5.54499	5.6527	-0.02156	-0.03513	-0.05438	-0.01357	-0.03282	-0.01925
chr7	45136275	45136284	+	chr7	45135355	45136639	CDS	Flt3l	17.0831	16.1166	17.1053	17.3684	0.07312	-0.00164	-0.0209	-0.07476	-0.09401	-0.01926
chr4	124606396	124606405	-	chr4	124605909	124606932	NA	NA	7.97285	12.6663	9.35374	9.519	-0.53534	-0.17911	-0.19913	0.35623	0.33621	-0.02002
chr6	137559090	137559099	-	chr6	137558703	137559360	transcript	Eps8	4.74149	4.87858	7.05172	7.20093	-0.02715	-0.40075	-0.42317	-0.37359	-0.39602	-0.02242
chr9	22810677	22810686	+	chr9	22810417	22810825	NA	NA	4.0148	5.28727	5.7579	5.8972	-0.25835	-0.34329	-0.3675	-0.08494	-0.10915	-0.02421
chr6	52691386	52691395	-	chr6	52691097	52693290	exon	Gm52884	1.7489	2.8297	3.18956	3.2872	-0.32879	-0.42351	-0.44817	-0.09472	-0.11938	-0.02466
chr10	93708408	93708417	+	chr10	93708083	93709299	CDS	Ntn4	2.27798	3.3905	3.27784	3.37794	-0.3035	-0.27551	-0.30041	0.02799	0.00309	-0.02489
chr4	15948477	15948486	-	chr4	15948313	15948746	NA	NA	12.0514	8.83144	5.30954	5.44887	0.36158	0.90012	0.87452	0.53854	0.51294	-0.0256
chr2	27981592	27981601	-	chr2	27981108	27982826	CDS	Col5a1	8.22194	6.70788	4.56753	4.69436	0.22021	0.60313	0.57737	0.38292	0.35716	-0.02576
chr2	30942004	30942013	+	chr2	30941199	30942113	NA	NA	2.89685	2.15694	2.6248	2.71908	0.21386	0.075	0.04856	-0.13886	-0.1653	-0.02643
chr19	41311550	41311559	+	chr19	41310856	41311612	NA	NA	3.55841	5.42515	2.8354	2.93363	-0.38898	0.1842	0.15775	0.57318	0.54673	-0.02645
chr16	23114783	23114792	+	chr16	23113639	23115375	CDS	Rfc4	4.70932	5.58644	5.47376	5.63714	-0.16622	-0.1459	-0.17526	0.02031	-0.00905	-0.02936
chr13	94428106	94428115	+	chr13	94426835	94428144	CDS	Ap3b1	0.98244	2.55171	2.02517	2.11936	-0.54009	-0.38041	-0.4103	0.15968	0.12979	-0.02989
chr6	17938863	17938872	+	chr6	17938158	17939267	CDS	St7	8.37656	14.7027	9.11474	9.3597	-0.6627	-0.09496	-0.12514	0.56775	0.53757	-0.03018
chr5	34930334	34930343	-	chr5	34930151	34931316	transcript	Msantd1	41.891	13.6735	14.5808	14.9414	1.45813	1.37926	1.34907	-0.07887	-0.10906	-0.03019
chr13	21276221	21276230	+	chr13	21274814	21276771	exon	n-TTtgt4	6.17844	9.07511	8.26077	8.50443	-0.41662	-0.31112	-0.34351	0.10549	0.07311	-0.03238
chr2	118805867	118805876	-	chr2	118805759	118806258	transcript	Gm38629	7.23523	8.64454	8.01858	8.26511	-0.19555	-0.11194	-0.14545	0.0836	0.05009	-0.03351
chr14	20615238	20615247	+	chr14	20614653	20615542	5UTR	Usp54	4.91543	4.79916	4.05632	4.21906	0.02288	0.17832	0.1428	0.15544	0.11992	-0.03551
chr14	61419026	61419035	+	chr14	61418219	61420489	NA	NA	2.0256	2.29366	2.86399	2.99757	-0.08349	-0.24652	-0.28218	-0.16303	-0.19869	-0.03566
chr3	60480679	60480688	+	chr3	60480351	60481198	5UTR	Mbnl1	3.00609	4.09563	5.34436	5.56227	-0.26163	-0.5127	-0.55236	-0.25107	-0.29073	-0.03966
chr17	86301374	86301383	+	chr17	86300660	86301807	NA	NA	37.334	38.0776	52.5402	54.0917	-0.0267	-0.46675	-0.50687	-0.44005	-0.48017	-0.04013
chr5	27709443	27709452	-	chr5	27708745	27709829	CDS	Dpp6	3.74453	2.90243	2.12832	2.25868	0.20994	0.43424	0.39394	0.2243	0.184	-0.0403
chr7	144491396	144491405	+	chr7	144491392	144491699	CDS	Ppfia1	5.85534	4.18167	3.72985	3.90932	0.32363	0.42506	0.38392	0.10143	0.06028	-0.04115
chr13	97680746	97680755	-	chr13	97680066	97681170	NA	NA	2.84917	3.42796	3.42055	3.59521	-0.14892	-0.14711	-0.18924	0.00181	-0.04032	-0.04213
chr1	155408155	155408164	+	chr1	155407773	155409213	CDS	Xpr1	6.4499	5.57922	6.23688	6.49594	0.14812	0.03486	-0.00742	-0.11326	-0.15554	-0.04228
chr6	83459428	83459437	+	chr6	83459390	83459668	NA	NA	5.92472	5.40832	6.98361	7.27871	0.09155	-0.17131	-0.21564	-0.26287	-0.3072	-0.04433
chr5	146838924	146838933	+	chr5	146838520	146839187	transcript	Rpl21	3.88735	3.33429	5.17063	5.41113	0.13123	-0.26513	-0.30982	-0.39636	-0.44105	-0.04469
chr10	108034199	108034208	-	chr10	108033140	108034261	NA	NA	5.17459	3.48384	2.27237	2.42503	0.36042	0.68841	0.64274	0.32799	0.28231	-0.04568
chr9	107307947	107307956	+	chr9	107307305	107308401	transcript	Cish	6.8632	11.9908	10.3648	10.7816	-0.63151	-0.45947	-0.50556	0.17204	0.12595	-0.04609
chr16	91056645	91056654	-	chr16	91055708	91057646	transcript	4932438H23Rik	10.5743	21.0839	22.4364	23.2475	-0.85237	-0.93291	-0.97913	-0.08054	-0.12676	-0.04623
chr7	98170901	98170910	+	chr7	98170121	98171918	5UTR	Capn5	4.72379	4.9886	7.31393	7.63347	-0.05213	-0.44347	-0.48982	-0.39134	-0.43769	-0.04635
chr1	40325570	40325579	+	chr1	40324423	40326123	5UTR	Il1rl2	5.75494	6.35809	7.81242	8.15117	-0.10205	-0.32198	-0.36872	-0.21992	-0.26667	-0.04675
chr18	33797857	33797866	-	chr18	33797822	33798183	CDS	Epb41l4a	1.87518	4.75067	3.18631	3.37768	-0.73224	-0.38017	-0.42814	0.35207	0.3041	-0.04797
chr6	134532094	134532103	+	chr6	134531919	134532328	CDS	Lrp6	16.4149	21.6324	18.6854	19.4014	-0.35188	-0.16376	-0.21177	0.18812	0.14011	-0.04801
chr9	22806339	22806348	-	chr9	22805970	22806907	NA	NA	13.5364	10.6313	11.4287	11.9024	0.28887	0.20365	0.15531	-0.08522	-0.13355	-0.04834
chr11	49877365	49877374	-	chr11	49876840	49877874	CDS	Mapk9	7.56828	7.27488	5.87352	6.1624	0.04278	0.26668	0.21759	0.2239	0.17481	-0.04908
chr11	48808355	48808364	-	chr11	48806603	48809452	CDS	Trim41	4.31933	5.04396	6.01144	6.31575	-0.14623	-0.32089	-0.37172	-0.17466	-0.22549	-0.05083
chr17	32108276	32108285	+	chr17	32107820	32109102	exon	Gm30729	2.08714	3.38177	4.3356	4.57985	-0.36049	-0.57821	-0.62906	-0.21772	-0.26857	-0.05084
chr2	155605079	155605088	+	chr2	155604521	155605532	NA	NA	23.9102	22.3571	19.9224	20.7277	0.08753	0.23641	0.18545	0.14888	0.09792	-0.05096
chr16	13447638	13447647	-	chr16	13446951	13449042	exon	Gm32817	4.4987	3.3465	3.98781	4.22635	0.26059	0.10979	0.05748	-0.1508	-0.20311	-0.0523
chr1	171244576	171244585	-	chr1	171244427	171245257	CDS	Ndufs2	7.62212	11.6247	10.2591	10.7354	-0.48178	-0.33479	-0.38777	0.14699	0.094	-0.05299
chr5	127756141	127756150	+	chr5	127755941	127756413	NA	NA	4.56176	4.088	3.14665	3.3661	0.10058	0.32399	0.26873	0.22341	0.16815	-0.05526
chr13	96414739	96414748	+	chr13	96414283	96414801	CDS	Poc5	1.93498	2.92255	2.63279	2.83759	-0.29161	-0.21199	-0.26872	0.07963	0.0229	-0.05673
chr5	106958964	106958973	-	chr5	106958563	106959559	NA	NA	4.06275	4.03372	4.59903	4.88617	0.00642	-0.11376	-0.17117	-0.12018	-0.1776	-0.05741
chr17	32108160	32108169	-	chr17	32107820	32109102	exon	Gm30729	2.2104	3.44398	3.34369	3.58299	-0.33726	-0.3126	-0.37076	0.02466	-0.0335	-0.05816
chr3	142332317	142332326	-	chr3	142332052	142333277	NA	NA	6.16982	8.63019	8.92189	9.39089	-0.36138	-0.39879	-0.45697	-0.03741	-0.0956	-0.05819
chr7	119854975	119854984	+	chr7	119853873	119855474	3UTR	Dcun1d3	4.01639	4.88929	4.05151	4.32881	-0.18206	-0.00779	-0.06783	0.17427	0.11423	-0.06004
chr12	80812330	80812339	+	chr12	80812077	80812847	NA	NA	12.8502	8.84242	9.03704	9.52964	0.43741	0.41281	0.35235	-0.0246	-0.08506	-0.06046
chr12	75771658	75771667	+	chr12	75771413	75771848	3UTR	Gm40447	14.5265	10.5994	9.64729	10.17	0.37895	0.48805	0.42713	0.10909	0.04817	-0.06092
chr18	70553619	70553628	+	chr18	70552746	70553764	exon	Gm31671	6.4987	3.6468	2.69502	2.91981	0.55185	0.7957	0.73428	0.24385	0.18243	-0.06142
chr15	63658130	63658139	-	chr15	63657299	63659050	NA	NA	1.74235	1.29628	3.58158	3.84503	0.16134	-0.52231	-0.58375	-0.68365	-0.74509	-0.06144
chr7	113820394	113820403	+	chr7	113820062	113820560	NA	NA	3.50898	4.24124	5.1062	5.43757	-0.16658	-0.34139	-0.40312	-0.17481	-0.23654	-0.06173
chr13	96414665	96414674	-	chr13	96414283	96414801	CDS	Poc5	4.57333	4.6362	4.58243	4.89094	-0.01281	-0.00186	-0.0636	0.01095	-0.05079	-0.06174
chr15	58984742	58984751	-	chr15	58984555	58985233	exon	Gm41330	3.55528	5.06312	3.69969	3.9771	-0.32205	-0.03415	-0.09757	0.2879	0.22448	-0.06342
chr2	152350034	152350043	-	chr2	152349749	152350386	exon	Gm14164	7.11214	16.1063	15.2969	16.1092	-0.95478	-0.89052	-0.95501	0.06426	-0.00023	-0.06449
chr11	115585033	115585042	+	chr11	115584538	115585848	exon	Gga3	3.41659	1.40969	2.61749	2.85169	0.60103	0.21034	0.14545	-0.39069	-0.45558	-0.06489
chr17	12185556	12185565	-	chr17	12185443	12186863	NA	NA	3.94763	3.60081	2.87546	3.12202	0.08011	0.26356	0.19855	0.18346	0.11845	-0.06501
chr6	83459439	83459448	+	chr6	83459390	83459668	NA	NA	6.37519	7.21207	7.87471	8.36159	-0.13037	-0.22584	-0.29217	-0.09547	-0.1618	-0.06633
chr2	155605145	155605154	+	chr2	155604521	155605532	NA	NA	24.1138	26.6999	27.77	29.2143	-0.13391	-0.18588	-0.25319	-0.05197	-0.11927	-0.0673
chr11	4116747	4116756	+	chr11	4116462	4119031	exon	Gm51934	33.9556	28.3766	16.2161	17.1112	0.23982	0.96285	0.89536	0.72303	0.65555	-0.06749
chr16	89986295	89986304	+	chr16	89985527	89987199	NA	NA	20.0966	17.2711	13.062	13.8066	0.19295	0.53884	0.4713	0.34589	0.27835	-0.06754
chr5	105411167	105411176	+	chr5	105410898	105411589	transcript	Gm32051	24.379	37.7447	29.5463	31.081	-0.58279	-0.2539	-0.32145	0.32888	0.26134	-0.06754
chr5	146868067	146868076	-	chr5	146865879	146868219	exon	Gm38748	5.5071	4.41033	5.14567	5.52191	0.21328	0.06686	-0.00267	-0.14642	-0.21596	-0.06954
chr19	47471556	47471565	-	chr19	47471499	47472605	NA	NA	2.90896	1.94255	3.64784	3.95983	0.2855	-0.18558	-0.25729	-0.47108	-0.5428	-0.07172
chr10	17562519	17562528	-	chr10	17561969	17563623	exon	Gm32543	1.97087	2.9787	3.50585	3.8153	-0.29485	-0.428	-0.50079	-0.13315	-0.20594	-0.07279
chr7	97747602	97747611	+	chr7	97747077	97748537	NA	NA	12.7826	16.8458	15.6725	16.6155	-0.34066	-0.25026	-0.32335	0.09039	0.01731	-0.07309
chr11	53633907	53633916	-	chr11	53633060	53634275	CDS	Il13	5.76052	4.08496	5.1866	5.5861	0.32823	0.10423	0.03089	-0.224	-0.29735	-0.07334
chr16	32444677	32444686	-	chr16	32444553	32445316	NA	NA	1.879	2.09898	3.23502	3.54133	-0.07113	-0.39126	-0.46667	-0.32013	-0.39554	-0.07541
chr12	83999482	83999491	-	chr12	83998200	83999888	transcript	Acot2	23.2954	22.8246	24.241	25.6877	0.0266	-0.05199	-0.12808	-0.07859	-0.15468	-0.07609
chr12	76670828	76670837	+	chr12	76670360	76671497	NA	NA	112.513	93.3439	78.9075	83.3278	0.2631	0.49869	0.42239	0.2356	0.15929	-0.07631
chr10	128645851	128645860	+	chr10	128645032	128646816	5UTR	Ikzf4	4.35086	10.294	10.298	10.993	-0.90369	-0.90415	-0.9806	-0.00045	-0.07691	-0.07645
chr4	35201746	35201755	+	chr4	35201279	35202217	exon	Gm12366	9.39252	7.98644	8.31871	8.90618	0.18196	0.13684	0.06038	-0.04512	-0.12158	-0.07647
chr13	59639605	59639614	+	chr13	59639334	59639756	CDS	Golm1	13.2792	11.529	6.46338	6.96165	0.16991	0.81775	0.73948	0.64784	0.56957	-0.07827
chr2	153493903	153493912	-	chr2	153493697	153494928	exon	4930404H24Rik	17.353	16.5593	16.5	17.5659	0.05894	0.06345	-0.0154	0.00451	-0.07435	-0.07885
chr8	13372892	13372901	-	chr8	13372688	13373747	CDS	Tfdp1	1.94155	1.58797	1.9644	2.21502	0.12042	-0.00745	-0.0867	-0.12787	-0.20712	-0.07925
chr10	127521553	127521562	+	chr10	127521280	127522607	CDS	Shmt2	5.38436	9.25778	7.18265	7.74698	-0.57814	-0.29731	-0.37925	0.28084	0.1989	-0.08194
chr6	135006354	135006363	-	chr6	135006078	135006792	NA	NA	3.72786	4.32992	3.84654	4.21727	-0.13367	-0.02735	-0.10959	0.10632	0.02409	-0.08224
chr8	46737687	46737696	-	chr8	46737425	46737731	exon	Gm16675	21.7295	9.9509	9.78549	10.5194	0.962	0.98134	0.89745	0.01934	-0.06455	-0.08388
chr1	179076642	179076651	-	chr1	179075899	179077100	transcript	Smyd3	2.9577	4.71267	4.22474	4.63083	-0.40394	-0.3025	-0.38742	0.10144	0.01652	-0.08491
chr18	6739319	6739328	-	chr18	6739235	6739973	NA	NA	2.94398	3.56504	3.278	3.62781	-0.15657	-0.08631	-0.17149	0.07026	-0.01492	-0.08518
chr9	35124280	35124289	+	chr9	35122284	35124623	exon	4930581F22Rik	3.24059	4.79963	6.39411	6.94889	-0.34805	-0.63401	-0.72156	-0.28596	-0.37351	-0.08755
chr2	90894196	90894205	+	chr2	90893418	90894703	exon	Gm32514	31.3901	20.7601	20.4735	21.953	0.54352	0.56143	0.47129	0.0179	-0.07224	-0.09014
chr5	107866749	107866758	+	chr5	107866086	107866789	CDS	Evi5	6.66735	5.34036	5.12627	5.61712	0.22629	0.26637	0.17608	0.04008	-0.05021	-0.09029
chr7	140201425	140201434	-	chr7	140200121	140201908	3UTR	Olfr524	5.08879	6.53824	4.90414	5.38634	-0.25298	0.03566	-0.05568	0.28864	0.1973	-0.09134
chr7	80025031	80025040	-	chr7	80024823	80025601	5UTR	Zfp710	6.78786	4.15688	5.40474	5.92199	0.48212	0.23335	0.14161	-0.24878	-0.34052	-0.09174
chr11	45805700	45805709	-	chr11	45805197	45805919	NA	NA	24.6195	24.0601	20.8727	22.4384	0.0301	0.21473	0.12108	0.18463	0.09098	-0.09365
chr7	67216427	67216436	+	chr7	67215849	67217549	exon	1700112J16Rik	8.36856	15.9388	6.00561	6.57736	-0.76403	0.35465	0.26051	1.11868	1.02454	-0.09414
chr15	59482048	59482057	+	chr15	59481859	59482456	NA	NA	2.95124	5.23043	4.21369	4.66758	-0.50603	-0.30184	-0.39658	0.20419	0.10945	-0.09474
chr16	32444640	32444649	+	chr16	32444553	32445316	NA	NA	1.80109	2.24678	3.23502	3.62263	-0.14308	-0.41732	-0.5121	-0.27424	-0.36901	-0.09477
chr19	9964674	9964683	+	chr19	9964370	9964902	NA	NA	3.06703	2.57964	3.20379	3.59284	0.13284	-0.03518	-0.1308	-0.16802	-0.26364	-0.09562
chr2	103895440	103895449	+	chr2	103895235	103895986	exon	Gm39895	6.86102	5.79379	7.36932	8.05395	0.17516	-0.07649	-0.17351	-0.25165	-0.34866	-0.09701
chr4	107221729	107221738	+	chr4	107221311	107221922	transcript	Ldlrad1	7.31906	10.9103	7.82051	8.55002	-0.45073	-0.07205	-0.17082	0.37868	0.2799	-0.09878
chr12	86913885	86913894	+	chr12	86913258	86913951	NA	NA	1.81517	1.10082	2.63743	3.00019	0.26285	-0.25305	-0.35197	-0.5159	-0.61483	-0.09893
chr3	152406147	152406156	+	chr3	152405287	152406733	5UTR	Zzz3	3.86662	6.48057	7.80266	8.53823	-0.49803	-0.69671	-0.79645	-0.19868	-0.29842	-0.09974
chr7	103813348	103813357	+	chr7	103813265	103814137	CDS	Hbb-bt	3.09791	4.20757	4.17315	4.65077	-0.26203	-0.25458	-0.35469	0.00745	-0.09266	-0.10011
chr9	107307970	107307979	+	chr9	107307305	107308401	transcript	Cish	7.78162	11.9908	11.1118	12.1148	-0.49615	-0.4057	-0.50846	0.09045	-0.01231	-0.10276
chr1	130374269	130374278	-	chr1	130373710	130374724	NA	NA	13.1389	6.16241	5.45644	6.04781	0.85426	0.9773	0.87353	0.12304	0.01927	-0.10376
chr5	27709410	27709419	+	chr5	27708745	27709829	CDS	Dpp6	7.48123	4.85807	4.27229	4.77828	0.44125	0.56139	0.45704	0.12013	0.01579	-0.10435
chr3	96383299	96383308	-	chr3	96382765	96383458	exon	n-TGccc1	1.12989	2.81248	3.08558	3.50457	-0.5528	-0.62547	-0.73031	-0.07267	-0.1775	-0.10483
chr4	152264019	152264028	+	chr4	152262731	152264168	CDS	Acot7	8.0688	6.44459	7.17126	7.90387	0.24138	0.12837	0.02275	-0.11301	-0.21863	-0.10562
chr10	121375168	121375177	-	chr10	121374117	121375590	CDS	Gns	4.71185	9.83309	12.492	13.6592	-0.77629	-1.05849	-1.16684	-0.2822	-0.39055	-0.10835
chr11	97446294	97446303	-	chr11	97445880	97446910	5UTR	Arhgap23	101.68	69.7837	75.3568	81.528	0.52749	0.4203	0.31022	-0.10719	-0.21727	-0.11008
chr11	62006088	62006097	-	chr11	62004921	62006989	5UTR	Specc1	10.6104	15.2852	15.4871	16.9114	-0.44072	-0.45704	-0.56713	-0.01631	-0.12641	-0.1101
chr1	87628476	87628485	-	chr1	87628113	87628737	exon	Inpp5d	42.7713	55.3476	65.5854	71.0225	-0.35384	-0.58903	-0.69991	-0.23519	-0.34607	-0.11088
chr11	77069287	77069296	-	chr11	77068755	77069957	CDS	Nsrp1	1.94612	1.81222	1.11553	1.4024	0.04438	0.30032	0.18939	0.25594	0.145	-0.11093
chr13	111657043	111657052	+	chr13	111655302	111657637	NA	NA	29.6419	18.5042	24.2234	26.397	0.61441	0.26659	0.15367	-0.34782	-0.46074	-0.11292
chr15	81891059	81891068	+	chr15	81890928	81891704	CDS	Aco2	1.65331	2.13556	1.8439	2.20795	-0.15944	-0.06513	-0.18192	0.09431	-0.02248	-0.11679
chr11	94350420	94350429	-	chr11	94349926	94351666	CDS	Abcc3	5.46539	5.61951	5.78015	6.47677	-0.02774	-0.05609	-0.17299	-0.02836	-0.14525	-0.1169
chrX	19246904	19246913	+	chrX	19246568	19247668	transcript	Gm41892	9.00923	4.86295	2.90354	3.35828	0.6463	1.09456	0.97744	0.44826	0.33114	-0.11712
chr9	107307456	107307465	-	chr9	107307305	107308401	transcript	Cish	27.8519	21.0585	36.5715	39.8737	0.3659	-0.36461	-0.48174	-0.73051	-0.84764	-0.11713
chr19	55565327	55565336	-	chr19	55563962	55565372	NA	NA	2.84063	2.85449	3.34519	3.83878	-0.00376	-0.13086	-0.24832	-0.1271	-0.24456	-0.11746
chr7	113391847	113391856	+	chr7	113391507	113392345	NA	NA	9.3533	17.1592	12.4287	13.6992	-0.73119	-0.33346	-0.4515	0.39773	0.27969	-0.11804
chr13	37886321	37886330	-	chr13	37885030	37886386	transcript	Rreb1	4.44455	3.40551	5.64868	6.34227	0.23479	-0.2315	-0.34972	-0.46629	-0.5845	-0.11822
chr7	144731460	144731469	+	chr7	144730655	144732514	CDS	Ano1	29.6834	25.8301	17.8966	19.651	0.18414	0.65867	0.53948	0.47453	0.35534	-0.11919
chr2	84840428	84840437	-	chr2	84839962	84841780	start_codon	Slc43a1	12.9592	7.37024	9.90707	10.9798	0.6487	0.31791	0.19803	-0.3308	-0.45068	-0.11988
chr15	58984807	58984816	-	chr15	58984555	58985233	exon	Gm41330	3.45885	6.03454	2.98864	3.46543	-0.52021	0.11913	-0.0016	0.63935	0.51861	-0.12073
chr5	142926404	142926413	-	chr5	142925914	142926815	NA	NA	12.7369	11.0753	10.4329	11.5597	0.1669	0.23697	0.11621	0.07007	-0.05068	-0.12075
chr12	83999004	83999013	-	chr12	83998200	83999888	transcript	Acot2	6.48438	9.29678	7.50589	8.38237	-0.39391	-0.15579	-0.27724	0.23812	0.11667	-0.12145
chr12	84299410	84299419	-	chr12	84299176	84299892	CDS	Ptgr2	22.6155	13.6051	10.0332	11.1384	0.64191	1.00435	0.88218	0.36244	0.24027	-0.12217
chr12	86914593	86914602	+	chr12	86914268	86915202	NA	NA	2.10434	2.24191	2.67965	3.13523	-0.04272	-0.17078	-0.293	-0.12807	-0.25028	-0.12222
chr19	59921405	59921414	-	chr19	59920793	59921523	transcript	Rab11fip2	3.75999	3.30259	4.04231	4.62001	0.10994	-0.0639	-0.18646	-0.17385	-0.2964	-0.12255
chr18	70552993	70553002	+	chr18	70552746	70553764	exon	Gm31671	5.58743	3.74647	4.4601	5.07929	0.37403	0.21734	0.09394	-0.15669	-0.2801	-0.1234
chr1	180148721	180148730	-	chr1	180147966	180148955	transcript	Gm38331	12.9009	24.0335	20.9206	23.0216	-0.78584	-0.60561	-0.72969	0.18023	0.05615	-0.12407
chr2	154764901	154764910	-	chr2	154764851	154766073	transcript	Gm38598	3.40031	9.81806	5.11713	5.79945	-1.06528	-0.36992	-0.4941	0.69537	0.57119	-0.12418
chr7	81773250	81773259	-	chr7	81773204	81773846	transcript	Ramac	3.29965	2.41298	3.74946	4.3123	0.24056	-0.10824	-0.23316	-0.3488	-0.47371	-0.12492
chr9	56973705	56973714	-	chr9	56973403	56974662	transcript	Snupn	1.26444	2.32709	1.9465	2.34691	-0.36096	-0.2418	-0.3669	0.11916	-0.00594	-0.12511
chr4	106909144	106909153	-	chr4	106908340	106909415	transcript	Gm52672	48.6132	29.8419	34.299	37.6375	0.66072	0.47432	0.34895	-0.1864	-0.31177	-0.12537
chr4	149676171	149676180	+	chr4	149675601	149676462	5UTR	Pik3cd	55.544	83.9028	68.0014	74.4567	-0.57414	-0.28062	-0.40706	0.29353	0.16708	-0.12644
chr1	34434979	34434988	+	chr1	34434646	34435186	exon	n-TEttc1	15.5493	15.5511	16.3914	18.1194	-0.00015	-0.06588	-0.19232	-0.06573	-0.19218	-0.12645
chr4	152263743	152263752	+	chr4	152262731	152264168	CDS	Acot7	3.02004	3.35295	2.56531	3.02958	-0.08488	0.12465	-0.0025	0.20953	0.08238	-0.12715
chr5	107873458	107873467	-	chr5	107873395	107874557	CDS	Evi5	5.82773	6.24369	6.57783	7.413	-0.07054	-0.1248	-0.25213	-0.05427	-0.18159	-0.12733
chr9	60262703	60262712	-	chr9	60262305	60263080	NA	NA	4.4611	7.7241	6.42202	7.25359	-0.55634	-0.35926	-0.48819	0.19708	0.06815	-0.12893
chr1	131029484	131029493	-	chr1	131029024	131029863	transcript	Il10	26.1364	25.5322	30.1204	33.2037	0.03079	-0.18809	-0.31849	-0.21888	-0.34928	-0.1304
chr3	40694564	40694573	-	chr3	40693357	40694904	CDS	Intu	25.3654	23.574	28.5482	31.5062	0.09596	-0.15617	-0.28757	-0.25213	-0.38353	-0.13139
chr19	55564535	55564544	+	chr19	55563962	55565372	NA	NA	11.7186	14.5524	16.626	18.4689	-0.26264	-0.42844	-0.56134	-0.1658	-0.2987	-0.1329
chr11	76242956	76242965	-	chr11	76242475	76244533	CDS	Glod4	3.62646	3.33496	4.59619	5.27934	0.07064	-0.21284	-0.34592	-0.28349	-0.41656	-0.13308
chr7	45136254	45136263	+	chr7	45135355	45136639	CDS	Flt3l	23.9879	19.1984	17.6145	19.5964	0.28806	0.39756	0.26181	0.1095	-0.02625	-0.13575
chr3	153792117	153792126	+	chr3	153791147	153792719	exon	5730460C07Rik	39.7227	22.5017	29.7061	32.9138	0.75661	0.39097	0.25388	-0.36565	-0.50273	-0.13709
chr5	5562499	5562508	+	chr5	5562140	5562754	NA	NA	1.05531	2.21666	1.861	2.2944	-0.41044	-0.29667	-0.43416	0.11377	-0.02372	-0.13748
chr9	107296669	107296678	-	chr9	107295488	107297156	5UTR	Cish	20.8887	26.5324	26.2271	29.1035	-0.31217	-0.2969	-0.4347	0.01526	-0.12253	-0.13779
chr1	194980882	194980891	+	chr1	194980784	194981513	exon	Gm32250	3.36663	3.58679	6.0227	6.88375	-0.05339	-0.54081	-0.68007	-0.48742	-0.62669	-0.13926
chr19	4478034	4478043	-	chr19	4477419	4478538	transcript	Syt12	6.3554	7.66675	10.8568	12.2177	-0.19978	-0.59439	-0.73464	-0.39461	-0.53485	-0.14024
chr6	38762705	38762714	-	chr6	38762566	38763297	transcript	Hipk2	8.94531	6.66478	4.24904	4.93702	0.32141	0.76432	0.62376	0.44291	0.30234	-0.14057
chr19	53888087	53888096	-	chr19	53886643	53888245	transcript	Gm30990	79.6989	45.1404	31.6597	35.1721	0.78727	1.26748	1.12617	0.48021	0.3389	-0.14131
chr5	57760415	57760424	-	chr5	57759928	57761058	NA	NA	3.98886	2.1791	3.17334	3.7567	0.47401	0.19461	0.05278	-0.2794	-0.42123	-0.14183
chr7	142086386	142086395	-	chr7	142086215	142087631	transcript	Dusp8	14.8222	11.8143	6.90794	7.8824	0.27563	0.88252	0.73995	0.60689	0.46433	-0.14257
chr16	32697134	32697143	-	chr16	32696535	32698065	NA	NA	2.35863	2.05423	2.69545	3.23417	0.09387	-0.09721	-0.24024	-0.19108	-0.33411	-0.14303
chr6	41706132	41706141	-	chr6	41705986	41706824	exon	Gm38796	4.07195	8.09443	8.13983	9.24647	-0.69112	-0.6973	-0.84039	-0.00618	-0.14927	-0.14309
chr4	138934167	138934176	+	chr4	138933631	138934335	exon	Gm18097	2.81841	5.72303	3.63374	4.28425	-0.63121	-0.20673	-0.35275	0.42449	0.27847	-0.14602
chr7	117399822	117399831	-	chr7	117399678	117400340	NA	NA	3.60607	3.35333	2.93331	3.5133	0.06126	0.16919	0.02218	0.10793	-0.03907	-0.147
chr7	45232965	45232974	-	chr7	45232919	45233902	transcript	Tead2	1.32766	1.89345	1.27441	1.67691	-0.20018	0.02035	-0.12681	0.22053	0.07337	-0.14716
chr14	14098864	14098873	-	chr14	14098043	14099153	CDS	Atxn7	23.6873	19.9716	19.9201	22.3374	0.221	0.22432	0.07643	0.00332	-0.14457	-0.14789
chr11	24129288	24129297	+	chr11	24129101	24130641	transcript	Bcl11a	4.9871	4.38425	5.7532	6.64562	0.12155	-0.14102	-0.2896	-0.26257	-0.41115	-0.14858
chr3	60472603	60472612	-	chr3	60472008	60473232	5UTR	Mbnl1	13.471	19.3531	12.4822	14.1353	-0.45303	0.09237	-0.05888	0.5454	0.39414	-0.15125
chr9	52104183	52104192	-	chr9	52103368	52104641	3UTR	Zc3h12c	20.3295	9.82355	8.41166	9.61827	0.8909	1.06685	0.91519	0.17595	0.02429	-0.15166
chr2	38536488	38536497	-	chr2	38536253	38536869	transcript	Nek6	9.34161	24.999	17.1733	19.354	-1.21735	-0.73365	-0.8855	0.48369	0.33184	-0.15185
chr9	3328475	3328484	+	chr9	3327409	3328990	NA	NA	38.5563	31.6762	19.1469	21.574	0.2648	0.92427	0.77078	0.65948	0.50599	-0.15349
chr15	86051356	86051365	-	chr15	86050063	86051621	exon	Gm41375	15.8879	18.2871	23.2022	26.0863	-0.17717	-0.48373	-0.63731	-0.30656	-0.46014	-0.15358
chr19	45615457	45615466	+	chr19	45614951	45616294	transcript	Fbxw4	2.44032	4.54757	4.39588	5.17383	-0.51483	-0.48332	-0.6381	0.03151	-0.12326	-0.15477
chr2	49160327	49160336	-	chr2	49159937	49161171	NA	NA	20.1331	15.0455	17.1972	19.4381	0.36782	0.20069	0.04505	-0.16713	-0.32277	-0.15565
chr8	94553044	94553053	-	chr8	94552653	94553681	CDS	Cpne2	6.04959	9.54207	9.16742	10.4949	-0.49545	-0.44975	-0.60555	0.0457	-0.1101	-0.1558
chr5	57760867	57760876	-	chr5	57759928	57761058	NA	NA	4.90959	6.21889	5.02113	5.87841	-0.23552	-0.02163	-0.17788	0.21389	0.05765	-0.15625
chr6	99106056	99106065	+	chr6	99105791	99108121	exon	Gm19665	17.445	16.193	15.0752	17.1076	0.09365	0.18274	0.02465	0.08909	-0.06901	-0.1581
chr9	32099044	32099053	-	chr9	32098149	32099417	NA	NA	12.7689	13.2896	11.9152	13.5841	-0.04846	0.08315	-0.07516	0.13161	-0.0267	-0.15832
chr6	31614274	31614283	+	chr6	31612675	31614539	exon	Gm31486	3.76261	3.87895	4.22217	5.01109	-0.02667	-0.10258	-0.26327	-0.07591	-0.23661	-0.16069
chr3	153905105	153905114	+	chr3	153904179	153905324	5UTR	Msh4	5.63309	5.0146	5.52912	6.48707	0.11449	0.01862	-0.14449	-0.09587	-0.25899	-0.16312
chr1	133951838	133951847	-	chr1	133951176	133951970	NA	NA	11.2558	22.0602	21.5226	24.4115	-0.8375	-0.80553	-0.96953	0.03197	-0.13203	-0.164
chr17	50025543	50025552	+	chr17	50024943	50026182	transcript	Rftn1	9.41433	8.11417	13.4804	15.4107	0.1671	-0.42442	-0.58919	-0.59151	-0.75629	-0.16478
chr14	56703396	56703405	-	chr14	56702447	56704060	transcript	Mphosph8	3.58256	2.85542	3.25041	3.94961	0.18453	0.08138	-0.08489	-0.10316	-0.26942	-0.16627
chr16	4034121	4034130	+	chr16	4033793	4034603	exon	Trap1	14.3703	16.4015	12.3736	14.1875	-0.16426	0.18203	0.01574	0.34629	0.18	-0.16629
chr6	136804531	136804540	+	chr6	136803072	136804604	3UTR	H4f16	33.5747	30.7915	30.7896	34.8862	0.11592	0.11601	-0.05155	8e-05	-0.16748	-0.16756
chr1	177717149	177717158	-	chr1	177716434	177717922	exon	Gm30115	2.51236	3.28299	3.99052	4.7896	-0.20734	-0.37458	-0.54273	-0.16724	-0.33539	-0.16815
chr19	53808466	53808475	-	chr19	53808106	53810553	exon	Gm16299	8.70212	11.5715	10.3787	11.9711	-0.3297	-0.20166	-0.37018	0.12804	-0.04048	-0.16851
chr11	115585698	115585707	+	chr11	115584538	115585848	exon	Gga3	3.92839	1.47342	2.89625	3.56468	0.69775	0.25364	0.08438	-0.44412	-0.61337	-0.16926
chr5	121462454	121462463	-	chr5	121461268	121462695	5UTR	Tmem116	6.37215	6.08451	7.37497	8.62009	0.04769	-0.15493	-0.32668	-0.20262	-0.37437	-0.17175
chr2	156898407	156898416	+	chr2	156898044	156898737	exon	Gm14248	2.1495	2.18158	3.07528	3.77686	-0.00998	-0.26333	-0.4351	-0.25336	-0.42512	-0.17177
chr17	50025166	50025175	+	chr17	50024943	50026182	transcript	Rftn1	12.4124	7.27311	6.44829	7.57875	0.61097	0.73853	0.56642	0.12757	-0.04455	-0.17211
chr10	77068399	77068408	-	chr10	77067981	77068955	CDS	Col18a1	7.6425	10.4589	8.76636	10.2081	-0.35434	-0.15198	-0.32609	0.20236	0.02825	-0.17411
chr5	143272800	143272809	-	chr5	143272057	143273382	NA	NA	26.5512	21.6646	20.2396	23.1543	0.26597	0.35376	0.17957	0.08779	-0.08639	-0.17418
chr6	99107768	99107777	+	chr6	99105791	99108121	exon	Gm19665	7.76335	8.06666	4.77508	5.70585	-0.04212	0.49799	0.32371	0.54012	0.36583	-0.17428
chr1	136445127	136445136	+	chr1	136444606	136445475	transcript	Ddx59	15.3985	11.472	9.46743	11.0163	0.35789	0.58178	0.40582	0.22388	0.04793	-0.17596
chr9	120002139	120002148	-	chr9	120001819	120002635	exon	Gm33800	4.33143	5.08819	6.09414	7.21584	-0.15213	-0.33231	-0.50981	-0.18019	-0.35768	-0.1775
chr2	152414923	152414932	-	chr2	152413475	152415422	CDS	Zcchc3	7.70962	6.69234	7.41125	8.70922	0.15184	0.0429	-0.13509	-0.10894	-0.28693	-0.17799
chr16	58526049	58526058	+	chr16	58525785	58526273	NA	NA	9.29259	11.9103	11.6577	13.5304	-0.28981	-0.26424	-0.44378	0.02556	-0.15397	-0.17954
chr11	97987993	97988002	+	chr11	97987483	97989315	exon	n-TCgca55	38.294	40.6069	37.4267	42.7281	-0.07961	0.03102	-0.14896	0.11063	-0.06934	-0.17998
chr14	41026143	41026152	-	chr14	41025131	41026629	NA	NA	3.22634	4.33386	3.35374	4.12931	-0.25617	-0.03189	-0.21215	0.22428	0.04401	-0.18026
chr1	86348259	86348268	-	chr1	86348162	86349184	3UTR	Ncl	3.81644	3.59967	4.08091	4.96155	0.0506	-0.05942	-0.24129	-0.11001	-0.29189	-0.18187
chr7	140201644	140201653	-	chr7	140200121	140201908	3UTR	Olfr524	4.39741	3.25421	3.44253	4.24994	0.26254	0.21587	0.0313	-0.04667	-0.23124	-0.18457
chr6	87528015	87528024	-	chr6	87527092	87528438	CDS	Arhgap25	27.0797	18.5609	17.0405	19.7258	0.49056	0.5988	0.4128	0.10824	-0.07776	-0.186
chr14	21807098	21807107	+	chr14	21806369	21807269	transcript	Samd8	11.5597	16.3613	9.92726	11.6666	-0.42456	0.17841	-0.01095	0.60297	0.41361	-0.18936
chr17	32108765	32108774	+	chr17	32107820	32109102	exon	Gm30729	6.29317	7.65785	8.01837	9.49325	-0.20872	-0.25917	-0.44893	-0.05044	-0.2402	-0.18976
chr16	91372568	91372577	-	chr16	91372381	91374048	5UTR	Ifnar2	16.2868	10.6191	15.3992	17.9164	0.51893	0.06993	-0.12017	-0.449	-0.6391	-0.1901
chr18	11797096	11797105	-	chr18	11795925	11797228	NA	NA	0.60765	0.93307	1.48568	2.04458	-0.14485	-0.36172	-0.55222	-0.21687	-0.40738	-0.1905
chr13	8849433	8849442	+	chr13	8849206	8850232	CDS	Wdr37	26.748	21.0762	12.9824	15.2107	0.31132	0.91886	0.72456	0.60755	0.41325	-0.1943
chr19	53801554	53801563	+	chr19	53801488	53802658	transcript	Rbm20	6.00839	3.46198	4.25755	5.23497	0.51501	0.33355	0.13794	-0.18146	-0.37707	-0.19561
chr9	67832068	67832077	+	chr9	67832023	67832626	transcript	C2cd4a	2.91847	6.60119	3.03473	3.83986	-0.75102	-0.03078	-0.22759	0.72025	0.52343	-0.19682
chr2	72752733	72752742	-	chr2	72752199	72753663	transcript	Gm30257	8.55006	15.2467	8.84862	10.5133	-0.6848	-0.03855	-0.23645	0.64625	0.44835	-0.1979
chr13	21259508	21259517	-	chr13	21259456	21260234	exon	n-TAagc19	2.97939	3.08604	2.46554	3.19929	-0.02794	0.14279	-0.05704	0.17073	-0.02909	-0.19982
chr17	86300974	86300983	-	chr17	86300660	86301807	NA	NA	14.5595	18.1148	16.8966	19.7915	-0.27349	-0.1855	-0.38644	0.08799	-0.11295	-0.20094
chr16	8688014	8688023	+	chr16	8687692	8688163	3UTR	Usp7	7.18923	4.24091	5.31237	6.48076	0.52516	0.31157	0.10986	-0.21359	-0.41531	-0.20171
chr4	59157201	59157210	+	chr4	59156951	59158114	exon	Rpsa-ps11	14.0562	15.4894	18.1061	21.255	-0.11996	-0.31615	-0.52156	-0.19619	-0.4016	-0.20541
chr11	88314852	88314861	-	chr11	88314181	88315260	NA	NA	4.2626	2.92712	4.10188	5.12297	0.31878	0.03484	-0.17341	-0.28394	-0.49219	-0.20825
chr11	117969511	117969520	+	chr11	117968720	117970288	5UTR	Socs3	8.76096	8.85541	7.413	8.95916	-0.01208	0.1844	-0.02523	0.19647	-0.01315	-0.20963
chr2	131186725	131186734	+	chr2	131186323	131187669	5UTR	Cdc25b	9.88076	6.13429	9.90439	11.851	0.52129	-0.00276	-0.21347	-0.52404	-0.73476	-0.21072
chr1	136445680	136445689	-	chr1	136445607	136446634	transcript	Ddx59	5.60664	3.88277	3.9185	4.9254	0.34619	0.33811	0.12707	-0.00809	-0.21913	-0.21104
chr14	16255530	16255539	-	chr14	16255499	16256707	CDS	Ngly1	2.74592	2.51427	2.19541	2.93124	0.06549	0.1608	-0.05033	0.09531	-0.11583	-0.21113
chr12	76594483	76594492	-	chr12	76593600	76594787	CDS	Sptb	7.53945	7.69751	8.74221	10.5316	-0.0226	-0.16365	-0.37721	-0.14106	-0.35461	-0.21355
chr7	126354830	126354839	-	chr7	126354739	126355482	exon	LOC115486475	6.44566	10.8864	9.58244	11.5225	-0.58293	-0.43476	-0.65002	0.14817	-0.0671	-0.21526
chr9	66913707	66913716	+	chr9	66913491	66914166	CDS	Rab8b	3.74074	6.843	5.23624	6.48519	-0.5842	-0.3111	-0.5277	0.2731	0.0565	-0.2166
chr5	23788654	23788663	-	chr5	23788494	23789544	5UTR	Rint1	8.67276	8.83015	11.8692	14.2123	-0.02023	-0.36375	-0.58205	-0.34352	-0.56182	-0.2183
chr2	149283404	149283413	-	chr2	149283184	149284904	NA	NA	1.62716	2.56949	3.03562	3.9415	-0.29842	-0.42595	-0.64558	-0.12754	-0.34716	-0.21962
chr19	35152370	35152379	-	chr19	35151285	35152893	exon	Gm31568	3.51009	5.63714	4.33926	5.46109	-0.4388	-0.18722	-0.40714	0.25157	0.03166	-0.21991
chr18	21160718	21160727	+	chr18	21159824	21161047	CDS	Garem1	5.33372	4.82194	3.41569	4.38563	0.09781	0.40673	0.18678	0.30892	0.08897	-0.21995
chr18	11796631	11796640	-	chr18	11795925	11797228	NA	NA	4.05316	4.97713	4.95468	6.19447	-0.19101	-0.18666	-0.40934	0.00435	-0.21833	-0.22268
chr2	156896709	156896718	-	chr2	156896388	156897366	exon	Gm14248	3.08639	3.95805	2.52468	3.3626	-0.21011	0.15365	-0.06995	0.36376	0.14016	-0.2236
chr9	76237550	76237559	+	chr9	76235958	76237859	CDS	Hcrtr2	6.68878	3.76211	3.27364	4.25054	0.55517	0.67285	0.44637	0.11768	-0.1088	-0.22648
chr3	96350839	96350848	+	chr3	96350662	96351422	exon	n-TGccc5	2.02205	3.2138	2.7372	3.62588	-0.33924	-0.21297	-0.44015	0.12626	-0.10092	-0.22718
chr11	31844004	31844013	+	chr11	31843436	31844539	transcript	Gm12107	78.8773	89.9073	70.8943	83.4933	-0.18344	0.14901	-0.07962	0.33245	0.10381	-0.22863
chr13	23555610	23555619	+	chr13	23554887	23556610	CDS	H1f3	24.2391	20.6185	17.6205	21.1012	0.21012	0.41075	0.18028	0.20063	-0.02984	-0.23047
chr2	49336734	49336743	+	chr2	49336457	49337816	NA	NA	3.3901	3.72791	4.25384	5.42386	-0.08081	-0.19825	-0.42958	-0.11744	-0.34877	-0.23133
chr5	96952241	96952250	-	chr5	96951213	96952514	NA	NA	5.11248	5.35016	5.21436	6.55385	-0.04451	-0.01925	-0.25096	0.02526	-0.20646	-0.23172
chr7	141452175	141452184	-	chr7	141452124	141452431	transcript	Rplp2	6.58001	8.05639	11.7096	14.1843	-0.21794	-0.64761	-0.87964	-0.42968	-0.6617	-0.23203
chr2	118806040	118806049	+	chr2	118805759	118806258	transcript	Gm38629	10.6581	10.5728	7.63807	9.42839	0.00941	0.37703	0.14185	0.36763	0.13245	-0.23518
chr17	25874832	25874841	+	chr17	25874579	25876287	5UTR	Mettl26	31.3069	26.5824	27.4355	32.7349	0.21735	0.1756	-0.05974	-0.04175	-0.27709	-0.23534
chr5	64601197	64601206	-	chr5	64600737	64602053	exon	Gm3716	3.62133	4.00065	3.25601	4.29399	-0.0871	0.08917	-0.15103	0.17628	-0.06393	-0.2402
chr7	16783464	16783473	-	chr7	16783099	16783861	exon	Slc1a5	16.4992	18.7273	13.455	16.3432	-0.16019	0.25231	0.01191	0.4125	0.1721	-0.2404
chr5	143512566	143512575	+	chr5	143512069	143512685	CDS	Rac1	7.44426	11.3032	9.18952	11.3067	-0.47414	-0.23385	-0.47451	0.24029	-0.00037	-0.24066
chr11	22931785	22931794	+	chr11	22931311	22932080	transcript	Commd1	6.86183	7.66383	4.81515	6.14367	-0.1189	0.35704	0.11549	0.47595	0.23439	-0.24156
chr7	106652115	106652124	+	chr7	106650923	106652651	NA	NA	11.1376	10.3483	9.08303	11.1995	0.08619	0.23608	-0.00654	0.14989	-0.09273	-0.24262
chr6	122609058	122609067	-	chr6	122609030	122610672	CDS	Gdf3	4.69109	4.39494	3.74302	4.88596	0.0609	0.20477	-0.03872	0.14387	-0.09962	-0.24349
chr14	41025823	41025832	+	chr14	41025131	41026629	NA	NA	19.1646	18.2833	12.349	15.0977	0.05999	0.54578	0.30035	0.4858	0.24037	-0.24543
chr15	62158669	62158678	-	chr15	62158141	62159697	exon	Pvt1	3.69767	4.7088	3.5796	4.71409	-0.2189	0.02787	-0.21996	0.24677	-0.00106	-0.24783
chr6	99106532	99106541	+	chr6	99105791	99108121	exon	Gm19665	5.01041	4.33331	3.03757	4.07728	0.13681	0.44145	0.19212	0.30464	0.05531	-0.24933
chr1	133727892	133727901	+	chr1	133727547	133729230	transcript	Atp2b4	3.34179	6.21222	3.26184	4.34536	-0.57878	0.01997	-0.22967	0.59876	0.34911	-0.24965
chr2	126818043	126818052	-	chr2	126817473	126818348	CDS	Trpm7	11.6619	8.848	4.67346	6.0261	0.32024	0.9839	0.73383	0.66365	0.41359	-0.25006
chr2	13413667	13413676	+	chr2	13413363	13414147	NA	NA	3.66529	6.38866	14.6725	17.9473	-0.5297	-1.48182	-1.73399	-0.95213	-1.2043	-0.25217
chr11	104310779	104310788	-	chr11	104309462	104311184	CDS	Mapt	16.6573	11.923	13.6977	16.8019	0.41018	0.24246	-0.01087	-0.16771	-0.42104	-0.25333
chr8	117360343	117360352	+	chr8	117359866	117360823	transcript	Cmip	36.9674	38.4376	35.2196	42.4646	-0.0528	0.06539	-0.18825	0.11819	-0.13545	-0.25364
chr9	107295525	107295534	+	chr9	107295488	107297156	5UTR	Cish	7.73785	6.02148	8.90583	11.0944	0.26549	-0.15624	-0.41002	-0.42173	-0.6755	-0.25378
chr15	98827740	98827749	+	chr15	98827531	98828610	5UTR	Prkag1	61.0666	73.0114	44.6903	53.8578	-0.24852	0.42999	0.17373	0.67851	0.42225	-0.25626
chr11	4117411	4117420	-	chr11	4116462	4119031	exon	Gm51934	7.30548	7.17277	5.34248	6.8621	0.01971	0.32325	0.06694	0.30354	0.04723	-0.25631
chr11	104310552	104310561	-	chr11	104309462	104311184	CDS	Mapt	11.417	8.05991	8.8092	11.0537	0.39912	0.29998	0.03824	-0.09914	-0.36088	-0.26174
chr11	62006213	62006222	-	chr11	62004921	62006989	5UTR	Specc1	4.07022	4.90951	4.5939	6.00111	-0.17409	-0.11107	-0.37303	0.06303	-0.19893	-0.26196
chr5	20945160	20945169	+	chr5	20944940	20945714	CDS	Rsbn1l	6.08569	5.42192	5.95733	7.65404	0.11646	0.0218	-0.24273	-0.09466	-0.35919	-0.26453
chr9	123124888	123124897	+	chr9	123123085	123125011	transcript	Exosc7	5.95899	4.40066	2.79291	3.85666	0.29477	0.67913	0.41371	0.38436	0.11894	-0.26542
chr5	30969401	30969410	+	chr5	30969367	30969884	5UTR	Tcf23	2.07129	2.23889	3.04289	4.16075	-0.05224	-0.2795	-0.54571	-0.22726	-0.49346	-0.2662
chr2	26587525	26587534	-	chr2	26586271	26587893	transcript	Egfl7	5.80456	8.86987	8.28487	10.4953	-0.45448	-0.37809	-0.64767	0.07639	-0.19319	-0.26958
chr6	31587644	31587653	+	chr6	31587626	31588076	NA	NA	1.67341	4.57103	3.04265	4.17836	-0.76445	-0.41161	-0.6817	0.35283	0.08274	-0.27009
chr1	133020283	133020292	+	chr1	133019420	133020837	5UTR	Mdm4	9.57782	14.5563	14.4917	18.0082	-0.49887	-0.49339	-0.76514	0.00548	-0.26627	-0.27175
chr17	29500923	29500932	-	chr17	29499695	29501331	transcript	Pim1	29.0464	20.0267	30.0197	36.7856	0.48632	-0.04388	-0.31677	-0.5302	-0.80309	-0.27289
chr1	86400587	86400596	+	chr1	86400175	86401195	NA	NA	4.34125	3.33234	3.61303	4.88736	0.23115	0.16304	-0.11121	-0.06811	-0.34236	-0.27425
chr5	123202070	123202079	-	chr5	123200794	123202429	NA	NA	13.675	7.17868	5.2724	6.89691	0.74246	1.05988	0.78521	0.31742	0.04274	-0.27468
chr3	144663434	144663443	-	chr3	144663195	144664073	NA	NA	11.0321	10.7519	9.28378	11.758	0.03025	0.2	-0.07553	0.16976	-0.10577	-0.27553
chr4	107172007	107172016	-	chr4	107171833	107172874	5UTR	Tceanc2	2.83402	2.7223	2.61943	3.69574	0.03069	0.05954	-0.21705	0.02885	-0.24774	-0.27659
chr2	152349865	152349874	+	chr2	152349749	152350386	exon	Gm14164	3.46111	6.10888	7.68371	9.83212	-0.53222	-0.77527	-1.05208	-0.24305	-0.51986	-0.27681
chr1	136007730	136007739	+	chr1	136007202	136008598	5UTR	Tmem9	8.28164	7.95378	7.97086	10.1867	0.04466	0.0423	-0.23527	-0.00236	-0.27993	-0.27757
chr13	112580844	112580853	-	chr13	112580435	112581328	transcript	Il31ra	2.30447	2.29672	2.72758	3.83921	0.00234	-0.12241	-0.40185	-0.12475	-0.40419	-0.27944
chr6	90619359	90619368	-	chr6	90618130	90619772	5UTR	Slc41a3	7.83157	6.48447	10.2306	12.9819	0.20211	-0.30194	-0.58475	-0.50405	-0.78686	-0.28281
chr17	24724317	24724326	+	chr17	24723112	24724630	CDS	Ndufb10	27.3787	29.4117	26.6996	33.0324	-0.09505	0.0332	-0.25022	0.12825	-0.15517	-0.28342
chr12	100999491	100999500	-	chr12	100998624	100999861	transcript	Ccdc88c	19.7249	15.3268	11.2392	14.2307	0.31855	0.69494	0.41025	0.37639	0.09169	-0.28469
chr10	43290760	43290769	+	chr10	43290533	43292105	NA	NA	5.68807	7.38221	8.80057	11.271	-0.27211	-0.46608	-0.75193	-0.19397	-0.47982	-0.28585
chr11	61684275	61684284	-	chr11	61683635	61684756	5UTR	Fam83g	15.4966	22.7749	13.8769	17.4905	-0.49059	0.13628	-0.1518	0.62686	0.33878	-0.28808
chr14	66210652	66210661	-	chr14	66209978	66211679	CDS	Ptk2b	5.11591	3.92519	5.07269	6.74395	0.24621	0.00824	-0.28038	-0.23797	-0.52658	-0.28861
chr12	8650149	8650158	+	chr12	8650039	8650444	NA	NA	3.36475	6.01143	4.51248	6.06098	-0.53936	-0.25892	-0.54776	0.28044	-0.0084	-0.28884
chr11	4223611	4223620	+	chr11	4223266	4224229	transcript	Castor1	11.2169	9.7129	11.3029	14.3576	0.16789	-0.00903	-0.29796	-0.17692	-0.46585	-0.28893
chr8	94553005	94553014	+	chr8	94552653	94553681	CDS	Cpne2	14.0226	12.5771	10.3822	13.2518	0.1323	0.35972	0.06903	0.22742	-0.06327	-0.29068
chr3	88746147	88746156	+	chr3	88745804	88746542	3UTR	Syt11	3.69237	3.09252	2.07005	3.09599	0.14766	0.44047	0.14676	0.29282	-0.0009	-0.29372
chr4	151730695	151730704	+	chr4	151729134	151730775	NA	NA	7.2346	6.2683	5.01137	6.7068	0.15126	0.37521	0.08065	0.22395	-0.07061	-0.29456
chr18	80603192	80603201	-	chr18	80602911	80603650	exon	Gm41790	1.1298	3.68227	2.70879	3.88459	-0.7726	-0.52426	-0.81925	0.24834	-0.04665	-0.295
chr13	18827353	18827362	-	chr13	18826800	18827623	CDS	Vps41	10.0234	9.53338	3.42244	4.76148	0.05771	1.08376	0.7885	1.02605	0.73079	-0.29526
chr19	9955633	9955642	+	chr19	9954021	9955950	NA	NA	15.8497	12.8864	13.9526	17.7599	0.2545	0.15767	-0.14307	-0.09682	-0.39757	-0.30074
chr2	38132465	38132474	+	chr2	38131609	38133700	5UTR	Dennd1a	31.1902	17.1501	15.7051	19.9562	0.7786	0.88895	0.58578	0.11035	-0.19282	-0.30317
chr19	47471961	47471970	-	chr19	47471499	47472605	NA	NA	12.5802	5.9607	12.4033	15.9149	0.83578	0.01705	-0.28868	-0.81873	-1.12446	-0.30573
chr7	142396266	142396275	-	chr7	142394284	142396288	NA	NA	3.25836	2.324	1.97263	3.02359	0.25671	0.36644	0.06033	0.10973	-0.19638	-0.30611
chr7	45124441	45124450	-	chr7	45124256	45125578	transcript	Rps11	123.324	100.141	108.581	134.931	0.29387	0.17983	-0.12733	-0.11404	-0.4212	-0.30716
chr16	58526065	58526074	+	chr16	58525785	58526273	NA	NA	9.89045	12.276	10.4501	13.5304	-0.25453	-0.06387	-0.37228	0.19066	-0.11775	-0.30841
chr4	152263647	152263656	+	chr4	152262731	152264168	CDS	Acot7	3.08996	3.30582	2.87366	4.15188	-0.05492	0.05721	-0.25202	0.11212	-0.1971	-0.30922
chr10	17563147	17563156	-	chr10	17561969	17563623	exon	Gm32543	16.0656	15.0267	17.2704	21.9916	0.0832	-0.09083	-0.40015	-0.17403	-0.48335	-0.30932
chr13	21276374	21276383	-	chr13	21274814	21276771	exon	n-TTtgt4	5.52283	5.52807	4.02323	5.57793	-0.00095	0.29962	-0.00991	0.30056	-0.00896	-0.30953
chr2	91949104	91949113	-	chr2	91948735	91949280	transcript	Dgkz	8.81321	7.46156	8.73668	11.4204	0.18402	0.00982	-0.29982	-0.17421	-0.48384	-0.30964
chr11	87426993	87427002	-	chr11	87426361	87427644	exon	Gm22068	77.9895	67.1428	92.2248	114.906	0.2089	-0.23501	-0.54478	-0.44391	-0.75368	-0.30976
chr10	108033379	108033388	+	chr10	108033140	108034261	NA	NA	4.84466	3.8454	3.0904	4.44112	0.2118	0.39538	0.08183	0.18357	-0.12997	-0.31355
chr13	23555601	23555610	+	chr13	23554887	23556610	CDS	H1f3	24.5889	19.8944	17.6205	22.5029	0.27486	0.42952	0.11572	0.15466	-0.15914	-0.3138
chr16	13447679	13447688	-	chr16	13446951	13449042	exon	Gm32817	2.615	4.75966	4.65064	6.38272	-0.50738	-0.48547	-0.79944	0.02191	-0.29206	-0.31397
chr14	20181962	20181971	+	chr14	20180398	20182047	CDS	Kcnk5	26.7854	23.142	20.9715	26.7103	0.19186	0.31959	0.00371	0.12773	-0.18815	-0.31589
chr4	86852933	86852942	+	chr4	86852918	86853396	3UTR	Rps6	5.1974	5.0523	4.51946	6.2403	0.02755	0.13349	-0.1839	0.10594	-0.21145	-0.31739
chr19	47537311	47537320	+	chr19	47536591	47538327	transcript	Stn1	5.82828	2.32017	3.3658	4.80317	0.79227	0.50762	0.19014	-0.28466	-0.60213	-0.31748
chr6	41114127	41114136	-	chr6	41112914	41114611	CDS	Trbv12-1	25.0472	32.4527	27.0254	34.3664	-0.34379	-0.10014	-0.42075	0.24365	-0.07696	-0.32061
chr5	67802749	67802758	-	chr5	67802157	67803633	5UTR	Atp8a1	15.0194	11.8529	11.1235	14.518	0.28809	0.36348	0.04196	0.07539	-0.24613	-0.32152
chr11	4235985	4235994	-	chr11	4235145	4237999	5UTR	Osm	5.23372	6.17194	5.65372	7.68473	-0.16573	-0.07655	-0.39836	0.08918	-0.23263	-0.32181
chr1	36161559	36161568	-	chr1	36161174	36161856	CDS	Uggt1	9.29165	9.96982	11.1266	14.5279	-0.08085	-0.20909	-0.53113	-0.12824	-0.45028	-0.32203
chr15	62038802	62038811	+	chr15	62037631	62039494	exon	Pvt1	8.41118	5.18157	6.07167	8.22254	0.5078	0.34911	0.02522	-0.15869	-0.48258	-0.32389
chr17	50026038	50026047	-	chr17	50024943	50026182	transcript	Rftn1	5.4499	5.79705	5.08022	6.98484	-0.06186	0.06893	-0.25546	0.13079	-0.1936	-0.32439
chr10	81633789	81633798	+	chr10	81633332	81634094	5UTR	Ankrd24	35.3172	33.1517	36.5332	46.3712	0.08513	-0.04569	-0.37017	-0.13082	-0.4553	-0.32448
chr13	112581058	112581067	+	chr13	112580435	112581328	transcript	Il31ra	3.37238	3.22414	2.67032	3.97068	0.03705	0.18458	-0.14057	0.14752	-0.17763	-0.32515
chr11	88605123	88605132	+	chr11	88604451	88605532	NA	NA	12.1431	10.4583	9.71622	12.8264	0.17668	0.26194	-0.06591	0.08526	-0.2426	-0.32785
chr3	58454994	58455003	+	chr3	58454137	58455053	transcript	Tsc22d2	2.42134	3.63889	2.11044	3.28577	-0.32047	0.09467	-0.23462	0.41514	0.08585	-0.32929
chr1	85579656	85579665	-	chr1	85579555	85580959	CDS	Sp110	1.90923	1.76612	0.80293	1.64935	0.04789	0.41969	0.08819	0.3718	0.04029	-0.33151
chr5	115059186	115059195	+	chr5	115058642	115059314	transcript	Sppl3	6.50078	6.46834	7.54451	10.1402	0.00522	-0.15873	-0.49112	-0.16395	-0.49634	-0.33239
chr2	167765304	167765313	+	chr2	167764803	167765854	exon	Gm32287	4.46163	10.5341	9.59501	12.7274	-0.90735	-0.79924	-1.13215	0.10811	-0.2248	-0.33291
chr12	76670992	76671001	-	chr12	76670360	76671497	NA	NA	31.2425	31.1179	19.1154	24.7252	0.00534	0.64314	0.30989	0.6378	0.30455	-0.33325
chr2	152413826	152413835	+	chr2	152413475	152415422	CDS	Zcchc3	7.51882	3.83501	4.13064	5.84999	0.66351	0.59744	0.26363	-0.06607	-0.39988	-0.33381
chr11	115903620	115903629	+	chr11	115902891	115903836	5UTR	Smim5	51.5645	30.712	36.7988	47.1532	0.70342	0.46046	0.12286	-0.24296	-0.58056	-0.3376
chr19	41906266	41906275	-	chr19	41906050	41907749	transcript	Gm46644	9.27663	5.16687	4.60242	6.47399	0.62095	0.73168	0.39312	0.11072	-0.22784	-0.33856
chr4	107804015	107804024	-	chr4	107802824	107804215	5UTR	Lrp8	26.0884	49.887	39.7129	50.8984	-0.87438	-0.56268	-0.90198	0.3117	-0.0276	-0.3393
chr7	45136082	45136091	-	chr7	45135355	45136639	CDS	Flt3l	8.05697	7.63929	6.76062	9.21991	0.05839	0.18952	-0.15112	0.13113	-0.20951	-0.34065
chr6	66052417	66052426	-	chr6	66051641	66052987	NA	NA	24.6849	19.0164	19.242	25.0603	0.33773	0.32267	-0.01981	-0.01507	-0.35754	-0.34248
chr15	67121218	67121227	-	chr15	67120178	67121677	5UTR	St3gal1	10.1081	6.17977	6.15579	8.4697	0.53999	0.54399	0.20127	0.004	-0.33871	-0.34272
chr13	95688536	95688545	+	chr13	95688034	95689418	exon	Gm48745	11.526	5.14615	5.26719	7.34514	0.87757	0.85483	0.51178	-0.02274	-0.36579	-0.34306
chr7	139360128	139360137	-	chr7	139359547	139360576	exon	Gm32571	3.40757	4.74641	3.20939	4.73519	-0.2959	0.04945	-0.29365	0.34535	0.00224	-0.34311
chr5	124200752	124200761	-	chr5	124200738	124201222	transcript	Pitpnm2os2	5.55664	3.37232	2.49705	3.83866	0.45801	0.69201	0.34729	0.23399	-0.11073	-0.34472
chr17	46032672	46032681	+	chr17	46030477	46033019	exon	Vegfa	6.70404	7.95902	7.95583	10.7734	-0.18491	-0.18446	-0.52947	0.00044	-0.34456	-0.345
chr7	122159237	122159246	-	chr7	122158503	122160240	5UTR	Plk1	11.6038	9.72404	11.8042	15.7072	0.20678	-0.02039	-0.36903	-0.22717	-0.57581	-0.34864
chr13	21882637	21882646	-	chr13	21881693	21883510	exon	n-TFgaa1	3.37069	2.5246	2.09942	3.35097	0.22562	0.35388	0.00488	0.12826	-0.22074	-0.349
chr19	55341350	55341359	+	chr19	55340840	55341841	NA	NA	1.77692	5.52919	3.70192	5.39342	-0.91286	-0.53892	-0.88817	0.37394	0.02469	-0.34926
chr13	59891555	59891564	+	chr13	59889687	59892274	exon	Gm19866	4.16539	3.88501	5.4829	7.66883	0.06225	-0.26117	-0.61137	-0.32342	-0.67362	-0.3502
chr9	44287168	44287177	-	chr9	44287072	44289309	transcript	Abcg4	8.47326	7.31119	7.58243	10.3643	0.1619	0.12246	-0.22989	-0.03945	-0.39179	-0.35234
chr11	97050983	97050992	-	chr11	97050216	97052734	exon	Osbpl7	6.09168	4.60738	5.50028	7.7137	0.27455	0.10322	-0.2502	-0.17133	-0.52475	-0.35342
chr4	123078259	123078268	-	chr4	123078045	123078825	exon	Gm12923	5.86132	6.93002	2.86994	4.3574	-0.17405	0.64137	0.28707	0.81542	0.46112	-0.3543
chr2	167765283	167765292	-	chr2	167764803	167765854	exon	Gm32287	5.59121	12.4833	9.85573	13.2953	-0.8911	-0.61238	-0.96737	0.27872	-0.07627	-0.35499
chr17	74903780	74903789	-	chr17	74903546	74905576	NA	NA	2.77218	1.66422	2.28906	3.62883	0.34228	0.13939	-0.21823	-0.2029	-0.56051	-0.35761
chr11	105151713	105151722	-	chr11	105151293	105153717	NA	NA	5.09038	4.37861	4.78121	6.82387	0.14258	0.06021	-0.29769	-0.08237	-0.44027	-0.3579
chr7	106651557	106651566	+	chr7	106650923	106652651	NA	NA	6.86676	4.86118	4.74616	6.78351	0.34872	0.37153	0.01292	0.0228	-0.33581	-0.35861
chr7	122160110	122160119	-	chr7	122158503	122160240	5UTR	Plk1	4.11029	4.29461	4.70292	6.73614	-0.03983	-0.12434	-0.48422	-0.08451	-0.44438	-0.35987
chr11	53615440	53615449	-	chr11	53615153	53615477	transcript	Il4	2.7025	6.53308	4.32436	6.26386	-0.79913	-0.39323	-0.75535	0.40589	0.04378	-0.36211
chr4	129386884	129386893	-	chr4	129385850	129387354	exon	C330020E22Rik	40.7865	38.0985	25.1852	33.094	0.09255	0.6453	0.28247	0.55275	0.18992	-0.36283
chr11	4094714	4094723	-	chr11	4094383	4095545	transcript	Gm51935	9.54776	11.5412	7.66186	10.5676	-0.22135	0.24619	-0.11747	0.46754	0.10388	-0.36366
chr11	5573600	5573609	-	chr11	5573585	5574472	CDS	Ankrd36	3.07369	3.9484	2.68213	4.16706	-0.21124	0.10561	-0.25954	0.31684	-0.0483	-0.36515
chr15	67121644	67121653	+	chr15	67120178	67121677	5UTR	St3gal1	3.87395	4.05488	4.29995	6.2632	-0.04055	-0.09371	-0.4609	-0.05316	-0.42036	-0.36719
chr11	73047620	73047629	-	chr11	73047437	73048769	exon	Ncbp3	34.1012	23.4881	31.1644	40.9859	0.49446	0.12075	-0.24882	-0.37371	-0.74328	-0.36958
chr12	78910991	78911000	-	chr12	78910584	78911413	exon	Gm46359	15.3884	16.8555	18.5903	24.7521	-0.11388	-0.23788	-0.60807	-0.124	-0.4942	-0.3702
chr5	64601265	64601274	-	chr5	64600737	64602053	exon	Gm3716	8.31017	4.90494	3.04679	4.66502	0.54745	0.96602	0.59514	0.41856	0.04769	-0.37087
chr13	21882552	21882561	+	chr13	21881693	21883510	exon	n-TFgaa1	12.1739	13.8555	12.601	17.0201	-0.1568	-0.04147	-0.41236	0.11533	-0.25556	-0.37089
chr2	118762424	118762433	+	chr2	118762154	118763184	transcript	Ccdc9b	9.00685	7.41096	10.0876	13.8088	0.21593	-0.12979	-0.50413	-0.34572	-0.72006	-0.37434
chr1	21344277	21344286	-	chr1	21343823	21344825	NA	NA	5.36944	5.5138	4.38064	6.43259	-0.02631	0.19442	-0.18339	0.22073	-0.15708	-0.37781
chr13	45513723	45513732	+	chr13	45511764	45513829	5UTR	Gmpr	5.82763	4.40176	4.07172	6.04323	0.27189	0.34286	-0.03699	0.07097	-0.30888	-0.37985
chr5	146704062	146704071	-	chr5	146703561	146704650	exon	4930573C15Rik	50.3988	56.4275	53.0473	70.1638	-0.15578	-0.07052	-0.4582	0.08526	-0.30242	-0.38768
chr1	64617265	64617274	-	chr1	64616616	64618099	5UTR	Mettl21a	45.8311	47.534	36.7953	49.0186	-0.04999	0.29878	-0.09219	0.34876	-0.04221	-0.39097
chr10	43290769	43290778	+	chr10	43290533	43292105	NA	NA	6.8165	7.76885	8.80057	12.3308	-0.14079	-0.27925	-0.67225	-0.13846	-0.53146	-0.393
chr3	51230077	51230086	-	chr3	51230032	51230802	exon	Noct	10.8249	19.6038	11.6607	16.0882	-0.73131	-0.08794	-0.48107	0.64337	0.25024	-0.39313
chr11	117320002	117320011	+	chr11	117319597	117320829	exon	Gm34065	10.6493	11.2339	10.6598	14.7897	-0.06287	-0.00115	-0.39562	0.06172	-0.33275	-0.39447
chr11	101658040	101658049	-	chr11	101657736	101659201	exon	Rnu2-10	19.8336	8.98367	14.7882	20.2179	0.96125	0.36992	-0.02464	-0.59132	-0.98589	-0.39457
chr7	142395182	142395191	-	chr7	142394284	142396288	NA	NA	5.06781	2.74573	3.89408	5.90583	0.53097	0.24407	-0.15202	-0.2869	-0.68298	-0.39608
chr15	59480989	59480998	+	chr15	59480222	59481543	NA	NA	2.78887	2.26018	2.28063	3.79533	0.15275	0.14653	-0.25248	-0.00622	-0.40522	-0.39901
chr15	62159472	62159481	+	chr15	62158141	62159697	exon	Pvt1	2.49642	5.80172	4.57639	6.82399	-0.73556	-0.50437	-0.9036	0.23119	-0.16804	-0.39923
chr7	25385844	25385853	+	chr7	25385814	25386763	transcript	4732471J01Rik	4.08725	2.97118	4.24084	6.39947	0.26901	-0.03338	-0.43555	-0.30239	-0.70456	-0.40216
chr11	11570543	11570552	+	chr11	11569311	11571665	transcript	Gm11998	4.39964	2.50367	2.43146	4.01119	0.46563	0.48672	0.08393	0.02108	-0.3817	-0.40279
chr15	103252813	103252822	+	chr15	103252342	103252988	5UTR	Nfe2	12.2725	10.3794	10.3309	14.4725	0.19823	0.20368	-0.20062	0.00545	-0.39885	-0.40429
chr18	64961888	64961897	-	chr18	64961442	64962037	NA	NA	53.3772	35.5554	27.7573	37.5922	0.55448	0.88555	0.4792	0.33108	-0.07527	-0.40635
chr19	59905875	59905884	-	chr19	59905392	59906809	3UTR	Rab11fip2	11.9959	11.4935	11.6379	16.2613	0.05098	0.03614	-0.37271	-0.01484	-0.4237	-0.40886
chr5	20815451	20815460	-	chr5	20814917	20815490	transcript	Gm42219	5.62141	6.43699	2.91298	4.68296	-0.13849	0.58766	0.17777	0.72615	0.31625	-0.4099
chr2	118806236	118806245	+	chr2	118805759	118806258	transcript	Gm38629	4.18083	5.39254	2.67789	4.3722	-0.24134	0.36932	-0.0409	0.61066	0.20044	-0.41023
chr14	66211405	66211414	+	chr14	66209978	66211679	CDS	Ptk2b	5.06067	2.54065	3.00721	4.82288	0.58743	0.45908	0.04627	-0.12835	-0.54116	-0.41281
chr12	87250547	87250556	+	chr12	87249834	87251097	CDS	Vipas39	4.78354	2.20425	1.03248	2.19865	0.63355	1.04954	0.63528	0.41598	0.00173	-0.41426
chr2	92451264	92451273	+	chr2	92450990	92452038	3UTR	Slc35c1	10.6281	10.179	10.0727	14.2533	0.05033	0.06249	-0.35241	0.01217	-0.40274	-0.4149
chr2	153292500	153292509	+	chr2	153291077	153292980	exon	Kif3b	6.75239	8.7374	5.53758	8.21676	-0.28114	0.20369	-0.21253	0.48483	0.0686	-0.41622
chr1	80643837	80643846	-	chr1	80643373	80644709	CDS	Dock10	3.67283	2.56338	2.61085	4.31128	0.28719	0.27366	-0.14257	-0.01353	-0.42976	-0.41623
chr6	22474208	22474217	-	chr6	22474147	22475100	NA	NA	0.37267	0.76085	1.41789	2.74123	-0.18445	-0.45125	-0.87354	-0.2668	-0.6891	-0.4223
chr17	32118266	32118275	-	chr17	32117638	32118415	3UTR	Notch3	6.51058	8.71898	6.20824	9.19311	-0.31708	0.04939	-0.37694	0.36647	-0.05986	-0.42632
chr14	79480682	79480691	-	chr14	79480659	79482200	5UTR	Elf1	7.06672	7.75536	8.54277	12.3508	-0.10055	-0.20754	-0.63586	-0.10699	-0.53531	-0.42832
chr6	28232599	28232608	+	chr6	28232228	28233594	exon	6530409C15Rik	14.0679	10.3372	7.16894	10.551	0.36872	0.7786	0.34485	0.40988	-0.02387	-0.43375
chr16	10786090	10786099	+	chr16	10784644	10786796	transcript	Socs1	12.3607	14.158	12.6899	18.1669	-0.16499	-0.03167	-0.47654	0.13332	-0.31155	-0.44488
chr4	106908964	106908973	+	chr4	106908340	106909415	transcript	Gm52672	23.4449	12.1556	11.7509	17.0023	0.82513	0.8656	0.41229	0.04047	-0.41285	-0.45331
chr10	45071031	45071040	+	chr10	45070913	45071417	CDS	Prep	34.0975	22.8363	22.6075	31.8957	0.531	0.5441	0.08959	0.0131	-0.44142	-0.45451
chr10	116513626	116513635	-	chr10	116512629	116513772	exon	Gm31593	2.11927	0.91919	1.14322	2.48832	0.43692	0.34467	-0.1115	-0.09225	-0.54842	-0.45617
chr16	30544844	30544853	+	chr16	30544690	30545422	CDS	Tmem44	15.7593	18.538	8.84982	13.0647	-0.20464	0.68723	0.23071	0.89187	0.43535	-0.45652
chr11	31844066	31844075	-	chr11	31843436	31844539	transcript	Gm12107	70.8667	64.5296	56.9015	79.1507	0.13038	0.30475	-0.15439	0.17437	-0.28477	-0.45914
chr1	128561084	128561093	+	chr1	128560223	128561677	NA	NA	47.1998	37.9997	21.2446	30.1757	0.2955	1.06648	0.60542	0.77098	0.30992	-0.46106
chr7	80542580	80542589	+	chr7	80541889	80542895	exon	Gm42398	37.9641	32.5676	26.1218	37.2631	0.20665	0.49992	0.02523	0.29327	-0.18142	-0.47469
chr11	77491438	77491447	-	chr11	77491096	77492022	NA	NA	9.06065	10.4653	9.33423	13.9665	-0.16579	-0.03382	-0.51129	0.13197	-0.3455	-0.47747
chr15	94403101	94403110	-	chr15	94403006	94404851	CDS	Adamts20	1.16981	2.50033	1.86913	3.58779	-0.44909	-0.25331	-0.73436	0.19578	-0.28526	-0.48104
chr3	101469722	101469731	-	chr3	101469460	101470213	transcript	Igsf3	2.52313	2.56549	3.61564	6.07363	-0.01218	-0.28528	-0.77447	-0.2731	-0.76229	-0.48919
chr1	40325106	40325115	+	chr1	40324423	40326123	5UTR	Il1rl2	3.5182	2.40457	2.79233	4.92028	0.29665	0.1863	-0.30334	-0.11035	-0.59999	-0.48964
chr11	48808291	48808300	+	chr11	48806603	48809452	CDS	Trim41	3.31877	3.72926	3.01986	5.25722	-0.09878	0.07644	-0.41647	0.17522	-0.31769	-0.4929
chr1	82815794	82815803	+	chr1	82815666	82816704	exon	Gm34286	2.55217	3.51556	2.8704	5.05621	-0.25301	-0.08857	-0.58327	0.16443	-0.33026	-0.49469
chr11	116533686	116533695	-	chr11	116531821	116533736	5UTR	Sphk1	10.4887	11.3317	10.0731	15.3092	-0.0909	0.04701	-0.45616	0.13791	-0.36526	-0.50317
chr15	73854632	73854641	-	chr15	73854178	73855630	NA	NA	12.018	13.5396	16.192	23.989	-0.14405	-0.36517	-0.86873	-0.22112	-0.72469	-0.50357
chr16	91373159	91373168	+	chr16	91372381	91374048	5UTR	Ifnar2	9.67153	12.1414	12.4546	18.7419	-0.26707	-0.29766	-0.80474	-0.03059	-0.53767	-0.50707
chr3	51673022	51673031	-	chr3	51672327	51674066	transcript	Mgst2	4.40918	3.05848	3.7277	6.41362	0.31517	0.15042	-0.36874	-0.16475	-0.68391	-0.51916
chr3	95311281	95311290	+	chr3	95310891	95311869	3UTR	LOC115489748	19.1236	18.3597	16.2223	24.3259	0.05195	0.20812	-0.31136	0.15617	-0.36331	-0.51948
chr8	123398400	123398409	+	chr8	123397376	123399113	CDS	Tcf25	21.7485	17.8976	20.3204	30.2202	0.24979	0.08767	-0.43269	-0.16213	-0.68248	-0.52036
chr8	11776311	11776320	-	chr8	11775638	11776583	NA	NA	10.8462	10.4094	9.61641	14.9782	0.0481	0.13976	-0.3898	0.09166	-0.43791	-0.52956
chr9	120002191	120002200	-	chr9	120001819	120002635	exon	Gm33800	12.8728	13.5455	21.2444	31.7947	-0.06189	-0.62808	-1.15898	-0.56619	-1.09709	-0.5309
chr5	64811639	64811648	+	chr5	64811051	64813165	5UTR	Klf3	18.8093	12.7588	10.5739	16.4734	0.48255	0.70592	0.16772	0.22337	-0.31483	-0.5382
chr17	23546644	23546653	+	chr17	23546077	23546685	exon	n-TPtgg6	11.9096	10.9458	7.68219	12.3211	0.10007	0.50208	-0.04069	0.40202	-0.14076	-0.54278
chr2	118659344	118659353	-	chr2	118659018	118660430	NA	NA	21.1718	29.5938	25.989	39.011	-0.43955	-0.2675	-0.81101	0.17204	-0.37147	-0.54351
chr15	62038114	62038123	+	chr15	62037631	62039494	exon	Pvt1	5.74997	4.52555	3.68605	6.50915	0.23258	0.41691	-0.12739	0.18433	-0.35998	-0.54431
chr3	86561679	86561688	-	chr3	86560435	86562004	NA	NA	16.5759	9.55005	10.0284	15.7765	0.66388	0.60759	0.06185	-0.05629	-0.60203	-0.54574
chr9	66988724	66988733	+	chr9	66988110	66989182	NA	NA	4.79333	4.10574	2.4683	4.74455	0.1434	0.55628	0.00972	0.41288	-0.13369	-0.54656
chr2	144248861	144248870	+	chr2	144248641	144250028	3UTR	Snx5	4.84091	3.51818	4.34614	7.49609	0.28778	0.10104	-0.44679	-0.18673	-0.73456	-0.54783
chr3	51230155	51230164	-	chr3	51230032	51230802	exon	Noct	28.4952	30.51	15.9007	24.7105	-0.09093	0.75313	0.18805	0.84406	0.27898	-0.56508
chr16	18236914	18236923	-	chr16	18236333	18237411	3UTR	Ranbp1	11.7708	8.75087	10.9985	17.5687	0.34374	0.08042	-0.49266	-0.26333	-0.8364	-0.57307
chr4	44004774	44004783	-	chr4	44003600	44004875	5UTR	Clta	5.41875	4.23679	4.13837	7.39087	0.23406	0.25537	-0.32179	0.02132	-0.55584	-0.57716
chr2	36198630	36198639	-	chr2	36198219	36199724	transcript	Gm46735	34.6412	48.515	30.4544	46.6697	-0.45818	0.17268	-0.405	0.63086	0.05318	-0.57768
chr19	53886848	53886857	+	chr19	53886643	53888245	transcript	Gm30990	12.207	10.2135	5.7304	9.78623	0.21054	0.83951	0.25997	0.62897	0.04943	-0.57954
chr2	26013652	26013661	-	chr2	26012961	26014701	5UTR	Ubac1	11.1116	10.9819	9.6232	15.6057	0.01384	0.16741	-0.4123	0.15357	-0.42614	-0.57971
chr18	60779742	60779751	-	chr18	60779413	60780894	transcript	Gm8731	3.05883	4.92891	3.70106	6.75843	-0.4201	-0.15845	-0.73873	0.26165	-0.31863	-0.58029
chr13	23556351	23556360	-	chr13	23554887	23556610	CDS	H1f3	10.7346	6.05099	9.61503	15.6068	0.63173	0.12779	-0.45299	-0.50395	-1.08473	-0.58078
chr5	107121307	107121316	-	chr5	107120633	107121951	CDS	Tgfbr3	5.3832	5.3716	4.08298	7.35061	0.00213	0.261	-0.3224	0.25887	-0.32453	-0.5834
chr14	20180647	20180656	-	chr14	20180398	20182047	CDS	Kcnk5	6.20725	5.52109	4.9098	8.62789	0.11879	0.23355	-0.35484	0.11476	-0.47364	-0.58839
chr9	107296658	107296667	-	chr9	107295488	107297156	5UTR	Cish	26.1545	20.1583	26.2271	40.7143	0.33907	-0.00366	-0.5932	-0.34273	-0.93227	-0.58954
chr17	78327165	78327174	+	chr17	78326893	78327689	transcript	Crim1	10.6552	6.40897	6.1085	10.4419	0.56368	0.61333	0.02363	0.04965	-0.54005	-0.5897
chr15	31369552	31369561	+	chr15	31369040	31369828	NA	NA	1.77247	2.56857	3.138	5.97203	-0.24792	-0.40228	-0.99207	-0.15437	-0.74416	-0.58979
chr15	67121500	67121509	-	chr15	67120178	67121677	5UTR	St3gal1	3.63537	2.77979	2.76662	5.42995	0.21768	0.2213	-0.37157	0.00362	-0.58925	-0.59287
chr10	127522490	127522499	-	chr10	127521280	127522607	CDS	Shmt2	11.2135	9.93989	10.9182	17.7803	0.14091	0.03146	-0.56538	-0.10944	-0.70629	-0.59685
chr6	86379914	86379923	-	chr6	86379848	86381034	transcript	Snrpg	1.63192	2.16912	1.72385	3.88687	-0.1774	-0.03195	-0.63157	0.14546	-0.45416	-0.59962
chr6	52692154	52692163	-	chr6	52691097	52693290	exon	Gm52884	3.55264	4.46459	2.33315	4.82929	-0.2033	0.32619	-0.27721	0.5295	-0.07391	-0.6034
chr17	74843399	74843408	-	chr17	74843396	74844101	CDS	Ttc27	1.88968	2.38392	0.93527	2.70702	-0.15481	0.35612	-0.24771	0.51092	-0.0929	-0.60383
chr10	20257055	20257064	+	chr10	20257005	20258070	CDS	Map7	3.65896	1.43155	1.86597	4.12336	0.65111	0.49893	-0.10531	-0.15217	-0.75642	-0.60425
chr17	12119514	12119523	+	chr17	12118149	12120031	5UTR	Agpat4	16.8119	19.3317	10.5441	17.3964	-0.17716	0.56704	-0.04307	0.7442	0.13409	-0.61011
chr11	106675894	106675903	-	chr11	106673884	106676369	CDS	Pecam1	3.65573	2.5092	1.9582	4.33351	0.29877	0.46783	-0.15131	0.16906	-0.45008	-0.61915
chr10	43598166	43598175	+	chr10	43598161	43598847	exon	F930017D23Rik	1.50396	2.23526	0.99767	2.8621	-0.24349	0.19642	-0.42379	0.43991	-0.1803	-0.62021
chr12	83949079	83949088	-	chr12	83949040	83949364	CDS	Heatr4	11.7072	9.00413	6.60638	11.4993	0.3051	0.64317	0.0213	0.33808	-0.2838	-0.62187
chr16	10785980	10785989	-	chr16	10784644	10786796	transcript	Socs1	9.20881	11.4195	7.15431	12.3753	-0.25003	0.27904	-0.34602	0.52908	-0.09598	-0.62506
chr13	95688894	95688903	-	chr13	95688034	95689418	exon	Gm48745	18.8479	12.2693	12.1377	20.1407	0.53228	0.54522	-0.08493	0.01293	-0.61721	-0.63015
chr10	62413813	62413822	-	chr10	62412980	62413963	CDS	Hkdc1	8.51129	10.3387	12.238	20.319	-0.22201	-0.42143	-1.05304	-0.19942	-0.83103	-0.63161
chr1	127243697	127243706	-	chr1	127242040	127243853	NA	NA	4.72521	4.0983	3.17836	6.30055	0.13145	0.34901	-0.2855	0.21756	-0.41695	-0.63451
chr7	123109034	123109043	+	chr7	123107990	123109082	transcript	Tnrc6a	1.70948	2.15951	2.41375	5.1267	-0.14741	-0.22449	-0.86149	-0.07707	-0.71407	-0.637
chr2	103895265	103895274	-	chr2	103895235	103895986	exon	Gm39895	4.6093	4.49654	4.09236	7.77465	0.02315	0.10933	-0.53296	0.08618	-0.55612	-0.6423
chr11	62576900	62576909	-	chr11	62575184	62577282	5UTR	Trpv2	17.9873	17.7422	9.95441	17.0084	0.01738	0.71927	0.07073	0.70189	0.05335	-0.64854
chr11	106675443	106675452	-	chr11	106673884	106676369	CDS	Pecam1	5.29768	5.04923	5.07198	9.44985	0.04688	0.04252	-0.61758	-0.00436	-0.66445	-0.6601
chr6	52692055	52692064	-	chr6	52691097	52693290	exon	Gm52884	4.38445	5.32668	5.57065	10.2596	-0.18573	-0.23016	-0.89272	-0.04443	-0.70699	-0.66256
chr15	86065028	86065037	-	chr15	86064420	86065623	5UTR	Gramd4	13.3327	13.7555	11.0095	18.9997	-0.03809	0.22934	-0.44205	0.26743	-0.40396	-0.67139
chr16	92697464	92697473	-	chr16	92697165	92698990	transcript	Runx1	49.7663	51.8546	49.2024	79.8575	-0.05655	0.01566	-0.65628	0.07221	-0.59974	-0.67194
chr11	87309672	87309681	-	chr11	87309220	87310249	exon	Gm22883	7.41887	7.67449	7.65332	13.6756	-0.03681	-0.03379	-0.70706	0.00301	-0.67025	-0.67327
chr15	62121847	62121856	+	chr15	62121646	62123105	NA	NA	3.47395	4.05574	3.13762	6.48567	-0.13464	0.08398	-0.59108	0.21862	-0.45644	-0.67506
chr2	4832478	4832487	+	chr2	4831271	4832503	exon	Gm13176	3.41751	3.59455	2.38682	5.2901	-0.04272	0.27746	-0.3982	0.32017	-0.35549	-0.67566
chr4	119275417	119275426	+	chr4	119274525	119275847	3UTR	Ybx1	4.78823	4.52532	5.38294	10.1761	0.0532	-0.11356	-0.80069	-0.16676	-0.85389	-0.68713
chr13	81643143	81643152	+	chr13	81642233	81643642	NA	NA	4.76692	3.11721	2.68767	5.8525	0.37303	0.48837	-0.20155	0.11533	-0.57458	-0.68991
chr11	101641550	101641559	-	chr11	101641268	101642569	exon	Gm24950	16.5163	7.5261	11.7091	20.643	0.92528	0.4211	-0.28369	-0.50418	-1.20897	-0.70479
chr3	135641864	135641873	-	chr3	135641008	135642056	NA	NA	5.5046	2.61344	2.18221	5.11498	0.64923	0.77703	0.07223	0.12779	-0.577	-0.70479
chr13	74734210	74734219	-	chr13	74733657	74734402	CDS	Cast	5.36803	4.85866	4.11611	8.26715	0.0969	0.25094	-0.45387	0.15404	-0.55076	-0.70481
chr6	127151912	127151921	-	chr6	127150185	127152812	transcript	Ccnd2	24.1144	28.9403	21.0153	35.8836	-0.24063	0.1788	-0.52872	0.41942	-0.2881	-0.70752
chr5	129025219	129025228	+	chr5	129024959	129026015	transcript	Ran	7.26097	5.38447	7.13049	13.3252	0.30894	0.01947	-0.69862	-0.28947	-1.00756	-0.71809
chr4	123078407	123078416	+	chr4	123078045	123078825	exon	Gm12923	10.9528	11.4278	9.13415	16.7455	-0.05016	0.20998	-0.51747	0.26015	-0.46731	-0.72745
chr11	115412369	115412378	+	chr11	115412337	115414114	exon	n-TRcct3	10.4847	5.5307	10.7248	19.4794	0.69503	-0.02649	-0.76054	-0.72152	-1.45557	-0.73405
chr1	155813173	155813182	-	chr1	155811884	155813596	exon	Qsox1	6.67352	5.05827	4.80747	9.66644	0.28031	0.32917	-0.40838	0.04886	-0.68869	-0.73755
chr11	78069949	78069958	+	chr11	78069452	78070464	exon	Mir451b	84.1064	51.0762	30.6563	53.4012	0.69315	1.3859	0.63184	0.69275	-0.06132	-0.75406
chrX	96095658	96095667	+	chrX	96095483	96097426	exon	Msn	7.76169	4.46879	5.27342	10.7824	0.56005	0.40184	-0.37309	-0.15821	-0.93314	-0.77493
chr6	136804570	136804579	+	chr6	136803072	136804604	3UTR	H4f16	29.5548	24.0237	17.3002	31.6332	0.2735	0.69576	-0.09071	0.42225	-0.36422	-0.78647
chr10	77068040	77068049	-	chr10	77067981	77068955	CDS	Col18a1	4.34729	2.7949	3.90876	8.65578	0.37257	0.09587	-0.70634	-0.2767	-1.07891	-0.80221
chr7	4899094	4899103	-	chr7	4898956	4901518	exon	Gm36210	3.45669	2.26307	3.97025	8.85602	0.32423	-0.11982	-0.93392	-0.44405	-1.25815	-0.8141
chr17	32108005	32108014	-	chr17	32107820	32109102	exon	Gm30729	4.29435	5.76717	4.09531	9.5589	-0.28406	0.04306	-0.83014	0.32712	-0.54608	-0.87321
chr16	4034041	4034050	-	chr16	4033793	4034603	exon	Trap1	11.5891	8.08825	4.59697	11.0631	0.41301	0.99197	0.05499	0.57896	-0.35801	-0.93698
chr3	86136277	86136286	+	chr3	86135333	86136642	3UTR	Rps3a1	7.96097	4.17079	4.99384	11.9413	0.65116	0.48268	-0.46619	-0.16848	-1.11735	-0.94887
chr18	56925921	56925930	+	chr18	56924632	56926083	5UTR	Marchf3	13.9442	11.9967	9.52873	21.2361	0.18217	0.45194	-0.53022	0.26978	-0.71239	-0.98216
chr16	91447337	91447346	+	chr16	91446966	91448722	NA	NA	6.01953	5.47127	4.0277	11.3118	0.09627	0.38557	-0.69877	0.28929	-0.79505	-1.08434

## Sheet: README
Supplemental Table 3: TOBIAS Footprint Scores for STAT motifs across all ATAC-seq peaks with differential accessibility between days 0-7 post-PHZ.
