# Supplementary material for: Regeneration alters open chromatin andcis-regulatory landscape of erythroid precursors
Source: HighWire-hosted journal article supplement (doi:10.1101/gr.279949.124), 2025-06-02
Supplement: Supplemental_Table_S4.xlsx [file Supplemental_Table_S4.xlsx]

## Sheet: Sheet1
TFBS (Transcription factor binding sites)				ATAC_peak			Annotated		Footprint_score							Footprint_score_Fold_change
Chr	Start	End	Strand	Chr	Start	End	Region	Gene	Day0	Day1	Day3	Day7	Day14	Day21	Day35	Day0/Day1	Day0/Day3	Day0/Day7	Day0/Day14	Day0/Day21	Day0/Day35	Day1/Day3	Day1/Day7	Day1/Day14	Day1/Day21	Day1/Day35	Day3/Day7	Day3/Day14	Day3/Day21	Day3/Day35	Day7/Day14	Day7/Day21	Day7/Day35	Day14/Day21	Day14/Day35	Day21/Day35
chr7	100855962	100855971	+	chr7	100855754	100856592	5UTR	Relt	0.39973	0.27208	0.17804	0.06287	1.6188	0.79071	0.57407	0.43131	0.85931	1.65259	-1.79404	-0.84116	-0.43609	0.428	1.22128	-2.22535	-1.27247	-0.8674	0.79328	-2.65335	-1.70047	-1.2954	-3.44663	-2.49375	-2.08867	0.95288	1.35796	0.40507
chr5	25081752	25081761	-	chr5	25081376	25081952	NA	NA	0.38492	0.26823	0.11233	0.07673	1.44906	0.55838	0.60564	0.40264	1.21384	1.48671	-1.68742	-0.44573	-0.54659	0.8112	1.08407	-2.09005	-0.84836	-0.94923	0.27287	-2.90126	-1.65956	-1.76043	-3.17413	-1.93244	-2.0333	1.24169	1.14083	-0.10086
chr17	29360913	29360922	-	chr17	29360711	29361235	5UTR	Fgd2	0.39554	0.30729	0.21827	0.07429	1.26459	0.46363	0.35276	0.28662	0.64821	1.53907	-1.47214	-0.18779	0.13186	0.3616	1.25245	-1.75876	-0.47441	-0.15476	0.89086	-2.12036	-0.83601	-0.51636	-3.01121	-1.72686	-1.40722	1.28435	1.604	0.31965
chr19	40708394	40708403	-	chr19	40708103	40708553	transcript	Entpd1	0.4346	0.18306	0.12052	0.09587	1.38464	0.62603	0.59721	0.93136	1.30007	1.47595	-1.48358	-0.4457	-0.38679	0.36871	0.54459	-2.41494	-1.37706	-1.31815	0.17588	-2.78365	-1.74577	-1.68685	-2.95953	-1.92165	-1.86274	1.03788	1.0968	0.05891
chr12	110778004	110778013	+	chr12	110777863	110778231	transcript	Wdr20	0.13842	0.04927	0.04623	0	0.62026	0.26932	0.37532	0.69703	0.72792	1.30372	-1.61867	-0.64395	-1.01306	0.03089	0.60669	-2.3157	-1.34098	-1.71009	0.5758	-2.34659	-1.37187	-1.74098	-2.92239	-1.94767	-2.31678	0.97472	0.60561	-0.36911
chr4	141477879	141477888	-	chr4	141477560	141478001	CDS	Spen	0.22182	0.14914	0.05063	0.03286	0.86093	0.43792	0.34312	0.37697	1.12539	1.31417	-1.59553	-0.75164	-0.46861	0.74841	0.93719	-1.9725	-1.12862	-0.84558	0.18878	-2.72091	-1.87703	-1.594	-2.9097	-2.06581	-1.78278	0.84389	1.12692	0.28303
chrX	169973014	169973023	-	chrX	169972842	169973582	exon	G530011O06Rik	0.24955	0.66768	0.41763	0.09859	1.33106	0.58425	0.10742	-1.14809	-0.57424	0.83417	-2.05163	-0.98078	0.76957	0.57385	1.98225	-0.90355	0.16731	1.91766	1.4084	-1.4774	-0.40654	1.34381	-2.8858	-1.81494	-0.06459	1.07086	2.82121	1.75035
chr4	125124933	125124942	+	chr4	125124765	125125139	CDS	Zc3h12a	0.82899	0.41355	0.25699	0.1577	1.75586	1.0443	1.20733	0.86245	1.39425	1.87357	-1.00283	-0.30242	-0.49549	0.5318	1.01112	-1.86528	-1.16487	-1.35793	0.47932	-2.39708	-1.69667	-1.88973	-2.8764	-2.17599	-2.36905	0.70041	0.50735	-0.19307
chr12	12301988	12301997	-	chr12	12301567	12302338	5UTR	Cyria	0.23813	0.12319	0.06693	0.06164	1.02877	0.47936	0.29442	0.61222	1.04416	1.09231	-1.75648	-0.78724	-0.22571	0.43194	0.48009	-2.36869	-1.39945	-0.83793	0.04814	-2.80064	-1.8314	-1.26987	-2.84878	-1.87954	-1.31802	0.96924	1.53077	0.56152
chr1	132341894	132341903	+	chr1	132341613	132342449	exon	F730311O21Rik	0.42105	0.28396	0.20655	0.09292	1.2417	0.71983	0.44549	0.44623	0.77661	1.46106	-1.37438	-0.65976	-0.06685	0.33038	1.01484	-1.82061	-1.10598	-0.51308	0.68446	-2.15099	-1.43637	-0.84346	-2.83544	-2.12082	-1.52792	0.71462	1.30753	0.59291
chr16	92874246	92874255	+	chr16	92873660	92874405	NA	NA	0.2103	0.15017	0.11823	0.06635	1.04459	0.34835	0.25794	0.31732	0.51935	0.92321	-1.90281	-0.53932	-0.20967	0.20204	0.60589	-2.22013	-0.85664	-0.52699	0.40386	-2.42217	-1.05868	-0.72903	-2.82602	-1.46253	-1.13288	1.36349	1.69314	0.32965
chr2	145741019	145741028	-	chr2	145740658	145741176	exon	BC039771	0.06733	0	0	0.00824	0.62499	0.16114	0.17563	0.77768	0.77768	0.65677	-2.15422	-0.66045	-0.74007	0	-0.12092	-2.93191	-1.43814	-1.51775	-0.12092	-2.93191	-1.43814	-1.51775	-2.81099	-1.31722	-1.39683	1.49377	1.41416	-0.07962
chr6	91713000	91713009	+	chr6	91712582	91713319	exon	Gm44981	0.42494	0.35881	0.23271	0.22173	2.06181	0.75008	0.80741	0.19656	0.66715	0.71643	-2.05406	-0.70154	-0.79632	0.47059	0.51987	-2.25062	-0.8981	-0.99288	0.04928	-2.72121	-1.36869	-1.46347	-2.77049	-1.41797	-1.51275	1.35252	1.25774	-0.09478
chr14	70175427	70175436	+	chr14	70175211	70176045	exon	Pdlim2	0.27143	0.22645	0.13079	0.08404	1.10802	0.26571	0.41731	0.18936	0.7004	1.03636	-1.71711	0.02275	-0.48432	0.51104	0.847	-1.90646	-0.16661	-0.67368	0.33596	-2.41751	-0.67766	-1.18472	-2.75346	-1.01361	-1.52068	1.73985	1.23279	-0.50707
chr18	32407450	32407459	-	chr18	32406810	32407724	transcript	Bin1	0.10495	0.0393	0.05465	0.03828	0.7952	0.1908	0.16136	0.57684	0.41987	0.5879	-2.1587	-0.517	-0.35973	-0.15696	0.01106	-2.73553	-1.09384	-0.93656	0.16802	-2.57857	-0.93687	-0.7796	-2.74659	-1.1049	-0.94763	1.6417	1.79897	0.15727
chr10	66864669	66864678	+	chr10	66864129	66864924	NA	NA	0.27261	0.25053	0.15489	0.06569	0.97596	0.68954	0.39153	0.08955	0.55827	1.1977	-1.54459	-1.09524	-0.40507	0.46872	1.10815	-1.63415	-1.18479	-0.49463	0.63943	-2.10287	-1.65351	-0.96335	-2.74229	-2.29294	-1.60277	0.44935	1.13952	0.69016
chr11	43385503	43385512	+	chr11	43385063	43385698	NA	NA	0.2366	0.21355	0.07911	0.06319	0.95922	0.29416	0.475	0.10418	0.93241	1.07138	-1.6709	-0.2314	-0.78289	0.82822	0.96719	-1.77508	-0.33559	-0.88707	0.13897	-2.60331	-1.16381	-1.71529	-2.74228	-1.30278	-1.85426	1.4395	0.88801	-0.55148
chr1	184478167	184478176	+	chr1	184478015	184478355	NA	NA	0.1743	0.0358	0.03073	0.03357	0.74678	0.28354	0.18321	1.04612	1.10349	1.07108	-1.64697	-0.49239	-0.04709	0.05737	0.02495	-2.69309	-1.53852	-1.09321	-0.03242	-2.75046	-1.59589	-1.15058	-2.71804	-1.56347	-1.11817	1.15457	1.59988	0.4453
chr2	52955225	52955234	+	chr2	52955063	52955527	NA	NA	0.23418	0.06555	0.05374	0.03981	0.78753	0.22681	0.33131	1.03932	1.15009	1.29271	-1.42483	0.03274	-0.37378	0.11077	0.25339	-2.46415	-1.00658	-1.4131	0.14262	-2.57492	-1.11734	-1.52386	-2.71754	-1.25996	-1.66648	1.45758	1.05106	-0.40652
chr7	142442801	142442810	+	chr7	142442425	142443019	CDS	Tnni2	0.06874	0.05363	0.03165	0.0411	0.78359	0.1848	0.11096	0.14036	0.37251	0.26809	-2.42917	-0.77574	-0.33232	0.23215	0.12773	-2.56953	-0.9161	-0.47267	-0.10442	-2.80168	-1.14825	-0.70482	-2.69726	-1.04383	-0.60041	1.65343	2.09686	0.44342
chr17	13683985	13683994	-	chr17	13683163	13684191	exon	Gm24867	0.23985	0.17092	0.06966	0.07287	0.98591	0.34687	0.32043	0.33336	1.02738	0.9994	-1.69289	-0.40089	-0.31172	0.69401	0.66603	-2.02626	-0.73425	-0.64508	-0.02798	-2.72027	-1.42827	-1.33909	-2.69229	-1.40029	-1.31111	1.292	1.38117	0.08917
chr2	60172755	60172764	-	chr2	60172336	60173032	NA	NA	0.15492	0.14756	0.07004	0.0727	0.94447	0.27673	0.22016	0.04326	0.60089	0.57771	-2.0596	-0.57421	-0.33552	0.55763	0.53446	-2.10286	-0.61747	-0.37877	-0.02317	-2.66049	-1.1751	-0.9364	-2.63732	-1.15193	-0.91323	1.48539	1.72409	0.23869
chr2	132094623	132094632	-	chr2	132094171	132094828	5UTR	Slc23a2	0.24207	0.22908	0.14029	0.11678	1.20369	0.50727	0.53694	0.05683	0.52	0.67239	-1.94832	-0.83878	-0.90824	0.46317	0.61556	-2.00514	-0.89561	-0.96507	0.15239	-2.46832	-1.35878	-1.42824	-2.6207	-1.51116	-1.58063	1.10954	1.04008	-0.06946
chr14	70175464	70175473	-	chr14	70175211	70176045	exon	Pdlim2	0.15921	0.19369	0.05865	0.06576	0.87771	0.20535	0.35384	-0.18401	0.72917	0.6636	-1.93914	-0.24128	-0.82203	0.91318	0.84761	-1.75513	-0.05727	-0.63802	-0.06557	-2.66831	-0.97045	-1.5512	-2.60273	-0.90488	-1.48563	1.69786	1.11711	-0.58075
chr4	119127406	119127415	+	chr4	119127014	119127627	transcript	Slc2a1	0.16642	0.15425	0.10448	0.04381	0.74195	0.31626	0.20635	0.06898	0.39141	0.91693	-1.68162	-0.65519	-0.20562	0.32244	0.84795	-1.7506	-0.72417	-0.2746	0.52551	-2.07304	-1.04661	-0.59704	-2.59855	-1.57212	-1.12255	1.02643	1.476	0.44957
chr4	119127417	119127426	-	chr4	119127014	119127627	transcript	Slc2a1	0.16642	0.15786	0.0904	0.04381	0.74195	0.31626	0.23152	0.04817	0.49743	0.91693	-1.68162	-0.65519	-0.32163	0.44926	0.86876	-1.72979	-0.70336	-0.3698	0.4195	-2.17905	-1.15262	-0.81906	-2.59855	-1.57212	-1.23856	1.02643	1.35999	0.33356
chr3	106790135	106790144	+	chr3	106789955	106790450	transcript	Cd53	0.10666	0.1604	0.05309	0.0212	0.60264	0.25313	0.24858	-0.34197	0.4474	0.79928	-1.79438	-0.78997	-0.77094	0.78937	1.14125	-1.45242	-0.448	-0.42898	0.35188	-2.24178	-1.23737	-1.21834	-2.59366	-1.58925	-1.57023	1.00442	1.02344	0.01902
chr9	109914409	109914418	-	chr9	109914241	109914802	exon	Gm4644	0.1206	0.10064	0.03635	0.04914	0.77026	0.29727	0.22956	0.14067	0.71817	0.58339	-2.00855	-0.86576	-0.59182	0.57751	0.44272	-2.14922	-1.00643	-0.73249	-0.13479	-2.72673	-1.58393	-1.30999	-2.59194	-1.44914	-1.1752	1.1428	1.41674	0.27394
chr1	51934711	51934720	-	chr1	51934183	51934883	exon	Gm8419	0.1528	0.07562	0.02599	0.05645	0.81269	0.36495	0.43748	0.54037	1.03889	0.71312	-1.8762	-0.89432	-1.10589	0.49851	0.17275	-2.41658	-1.43469	-1.64626	-0.32576	-2.91509	-1.93321	-2.14478	-2.58933	-1.60744	-1.81901	0.98188	0.77031	-0.21157
chr2	166446717	166446726	+	chr2	166446347	166447244	exon	5031425F14Rik	0.13235	0.09004	0.03632	0.02095	0.59851	0.23531	0.13572	0.29817	0.79532	0.97601	-1.61221	-0.54039	-0.0213	0.49715	0.67784	-1.91038	-0.83856	-0.31947	0.18068	-2.40753	-1.33572	-0.81662	-2.58821	-1.5164	-0.9973	1.07181	1.59091	0.5191
chr3	131208673	131208682	-	chr3	131207871	131208952	exon	Lef1	0.20685	0.17683	0.09397	0.0572	0.8138	0.38022	0.24551	0.15152	0.67782	0.9914	-1.59253	-0.65607	-0.17427	0.5263	0.83988	-1.74405	-0.8076	-0.3258	0.31358	-2.27035	-1.3339	-0.8521	-2.58393	-1.64748	-1.16567	0.93645	1.41826	0.4818
chr11	34010913	34010922	-	chr11	34010697	34011157	NA	NA	0.07493	0.14504	0.07368	0.04067	0.71122	0.35222	0.36604	-0.5002	0.0107	0.32645	-2.25127	-1.4	-1.44398	0.5109	0.82666	-1.75107	-0.8998	-0.94378	0.31576	-2.26197	-1.4107	-1.45468	-2.57773	-1.72646	-1.77044	0.85127	0.80729	-0.04398
chr8	14992884	14992893	-	chr8	14992744	14993134	exon	Gm35149	0.24382	0.20893	0.16589	0.0902	1.00686	0.3366	0.20673	0.15715	0.37803	0.87409	-1.70356	-0.34986	0.16765	0.22089	0.71694	-1.86071	-0.50701	0.01051	0.49606	-2.0816	-0.7279	-0.21038	-2.57766	-1.22396	-0.70644	1.3537	1.87122	0.51752
chr17	57078522	57078531	+	chr17	57077831	57078717	CDS	Dennd1c	0.25373	0.2006	0.09439	0.10045	1.06197	0.31399	0.40238	0.23902	0.88337	0.83775	-1.73234	-0.23041	-0.51317	0.64435	0.59873	-1.97136	-0.46944	-0.75219	-0.04562	-2.61571	-1.11378	-1.39654	-2.57009	-1.06816	-1.35092	1.50193	1.21917	-0.28275
chr15	60141642	60141651	+	chr15	60141507	60142180	exon	Gm41331	0.12351	0.07589	0.07404	0	0.46428	0.12902	0.16392	0.35602	0.37179	1.20817	-1.3589	-0.03605	-0.24558	0.01577	0.85216	-1.71491	-0.39207	-0.6016	0.83638	-1.73069	-0.40784	-0.61737	-2.56707	-1.24422	-1.45376	1.32285	1.11331	-0.20953
chr11	70374442	70374451	+	chr11	70374346	70374704	CDS	Alox15	0.13645	0.07612	0.02582	0.01437	0.54333	0.21802	0.22617	0.43735	0.94214	1.08673	-1.46659	-0.43678	-0.47395	0.5048	0.64938	-1.90394	-0.87412	-0.91129	0.14459	-2.40873	-1.37892	-1.41609	-2.55332	-1.5235	-1.56067	1.02981	0.99264	-0.03717
chr1	135517131	135517140	-	chr1	135516810	135517307	exon	Gm32940	0.04236	0.06868	0.02453	0	0.44978	0.12481	0.15892	-0.25419	0.20177	0.5355	-1.99362	-0.68126	-0.89004	0.45596	0.78969	-1.73943	-0.42707	-0.63585	0.33373	-2.19539	-0.88303	-1.09181	-2.52912	-1.21676	-1.42554	1.31236	1.10358	-0.20878
chr10	81298864	81298873	-	chr10	81298583	81299092	exon	Gm16315	0.17901	0.1404	0.06545	0.07774	0.8983	0.43426	0.21812	0.21976	0.77491	0.66795	-1.86087	-0.95166	-0.19298	0.55515	0.44819	-2.08063	-1.17142	-0.41275	-0.10696	-2.63578	-1.72657	-0.96789	-2.52882	-1.61961	-0.86093	0.90921	1.66788	0.75867
chr18	53266631	53266640	-	chr18	53266348	53266712	NA	NA	0.07604	0.06982	0.05658	0.0127	0.52296	0.18999	0.07811	0.05368	0.17507	0.67106	-1.85777	-0.73912	-0.01743	0.12139	0.61737	-1.91145	-0.7928	-0.07111	0.49599	-2.03284	-0.91419	-0.1925	-2.52882	-1.41017	-0.68849	1.11865	1.84034	0.72168
chr11	71251525	71251534	-	chr11	71251327	71251798	exon	Nlrp1c-ps	0.12046	0.02474	0.03373	0.0344	0.64771	0.22967	0.18459	0.85155	0.74647	0.73894	-1.78895	-0.59325	-0.37705	-0.10508	-0.11261	-2.6405	-1.4448	-1.2286	-0.00753	-2.53542	-1.33972	-1.12352	-2.52789	-1.33219	-1.11599	1.1957	1.4119	0.2162
chr9	65545780	65545789	+	chr9	65545646	65545987	3UTR	Plekho2	0.17621	0.13376	0.09719	0.06575	0.82322	0.23826	0.26798	0.24632	0.49852	0.75734	-1.76225	-0.29798	-0.42149	0.2522	0.51103	-2.00856	-0.5443	-0.66781	0.25882	-2.26077	-0.79651	-0.92001	-2.51959	-1.05533	-1.17883	1.46426	1.34075	-0.12351
chr6	108537130	108537139	+	chr6	108536619	108537330	NA	NA	0.26311	0.26729	0.12415	0.10664	1.05699	0.40817	0.52426	-0.01678	0.71041	0.83097	-1.68774	-0.49152	-0.79142	0.72718	0.84775	-1.67096	-0.47474	-0.77464	0.12057	-2.39814	-1.20192	-1.50182	-2.51871	-1.32249	-1.62239	1.19622	0.89632	-0.2999
chr2	170307682	170307691	-	chr2	170307513	170307936	NA	NA	0.1378	0.11915	0.02956	0.03566	0.6495	0.19531	0.14531	0.12088	0.90631	0.83692	-1.68038	-0.31943	-0.04595	0.78543	0.71605	-1.80126	-0.4403	-0.16683	-0.06938	-2.58669	-1.22573	-0.95226	-2.51731	-1.15635	-0.88287	1.36096	1.63443	0.27348
chrX	134116632	134116641	+	chrX	134116402	134116761	NA	NA	0.07802	0.11625	0.08791	0.01892	0.55211	0.26931	0.11244	-0.28915	-0.08053	0.60618	-1.90767	-1.07752	-0.2628	0.20861	0.89533	-1.61852	-0.78837	0.02635	0.68671	-1.82713	-0.99699	-0.18226	-2.51385	-1.6837	-0.86898	0.83014	1.64487	0.81472
chr9	32508922	32508931	-	chr9	32508724	32509035	NA	NA	0.16177	0.14085	0.1088	0.0881	0.94722	0.31684	0.34059	0.12298	0.33442	0.48955	-2.02429	-0.6832	-0.76423	0.21144	0.36656	-2.14727	-0.80618	-0.88721	0.15512	-2.35871	-1.01762	-1.09865	-2.51384	-1.17274	-1.25377	1.3411	1.26006	-0.08103
chr16	84967234	84967243	-	chr16	84966971	84967421	CDS	App	0.06105	0.04485	0.02614	0.02005	0.55315	0.24189	0.21137	0.15894	0.36734	0.44223	-2.0596	-1.114	-0.97668	0.20841	0.2833	-2.21853	-1.27294	-1.13562	0.07489	-2.42694	-1.48135	-1.34402	-2.50183	-1.55624	-1.41891	0.9456	1.08292	0.13732
chr2	83929625	83929634	+	chr2	83929463	83929986	CDS	Zswim2	0.12718	0.08056	0.04038	0.02096	0.54878	0.15984	0.23443	0.34106	0.71785	0.94258	-1.53804	-0.19849	-0.56983	0.37679	0.60152	-1.8791	-0.53955	-0.9109	0.22473	-2.25589	-0.91634	-1.28768	-2.48062	-1.14107	-1.51242	1.33955	0.9682	-0.37134
chr2	178506157	178506166	-	chr2	178506007	178506444	NA	NA	0.16035	0.04423	0.03767	0.0449	0.68237	0.2775	0.21549	0.87855	0.94857	0.87159	-1.60898	-0.5461	-0.28283	0.07001	-0.00696	-2.48753	-1.42466	-1.16138	-0.07698	-2.55755	-1.49467	-1.23139	-2.48057	-1.41769	-1.15442	1.06288	1.32615	0.26328
chr8	115414272	115414281	-	chr8	115414070	115414612	NA	NA	0.14425	0.06702	0.04659	0.03816	0.64075	0.18829	0.25076	0.56451	0.75993	0.84898	-1.62375	-0.24447	-0.53265	0.19542	0.28447	-2.18827	-0.80898	-1.09716	0.08905	-2.38369	-1.0044	-1.29258	-2.47273	-1.09344	-1.38163	1.37929	1.09111	-0.28818
chr13	37356724	37356733	-	chr13	37356581	37357068	NA	NA	0.03957	0.05528	0.03649	0	0.42872	0.09255	0.09139	-0.16014	0.03359	0.50573	-1.96643	-0.4812	-0.47221	0.19373	0.66587	-1.80629	-0.32106	-0.31207	0.47214	-2.00003	-0.51479	-0.50581	-2.47216	-0.98693	-0.97794	1.48523	1.49422	0.00899
chr17	26531745	26531754	+	chr17	26531602	26532131	exon	1700049J03Rik	0.09704	0.04015	0.0348	0.0488	0.69698	0.21321	0.11454	0.50923	0.56783	0.41924	-2.04834	-0.68464	-0.12629	0.0586	-0.08999	-2.55756	-1.19387	-0.63552	-0.14859	-2.61617	-1.25247	-0.69412	-2.46758	-1.10388	-0.54553	1.3637	1.92204	0.55835
chr6	134701047	134701056	+	chr6	134700499	134701219	NA	NA	0.25287	0.28435	0.09515	0.07375	0.83414	0.40127	0.29844	-0.12524	0.874	1.04697	-1.4193	-0.51351	-0.17796	0.99924	1.17221	-1.29406	-0.38827	-0.05272	0.17298	-2.29329	-1.38751	-1.05195	-2.46627	-1.56048	-1.22493	0.90579	1.24134	0.33555
chr2	132094666	132094675	+	chr2	132094171	132094828	5UTR	Slc23a2	0.25242	0.19563	0.09575	0.1183	1.07903	0.54328	0.32912	0.25811	0.86756	0.70576	-1.75891	-0.87893	-0.28836	0.60946	0.44765	-2.01702	-1.13704	-0.54646	-0.1618	-2.62648	-1.74649	-1.15592	-2.46467	-1.58469	-0.99412	0.87998	1.47056	0.59057
chr4	43454667	43454676	+	chr4	43454113	43454769	transcript	Cd72	0.39078	0.38941	0.12101	0.07587	0.84463	0.37703	0.60959	0.00408	1.17199	1.51152	-0.95287	0.04149	-0.53717	1.16791	1.50744	-0.95695	0.03741	-0.54125	0.33953	-2.12486	-1.1305	-1.70917	-2.46439	-1.47003	-2.04869	0.99436	0.41569	-0.57866
chr16	23279969	23279978	+	chr16	23279780	23280204	NA	NA	0.13948	0.1002	0.09711	0.04826	0.68605	0.23411	0.19972	0.26544	0.28855	0.71378	-1.73919	-0.49044	-0.33083	0.02311	0.44834	-2.00463	-0.75588	-0.59627	0.42523	-2.02774	-0.77899	-0.61938	-2.45297	-1.20422	-1.04461	1.24875	1.40836	0.15961
chr2	60843259	60843268	+	chr2	60842949	60843376	CDS	Rbms1	0.11591	0.06189	0.03783	0.03526	0.61081	0.15464	0.22312	0.42865	0.67008	0.69842	-1.74626	-0.24402	-0.59468	0.24143	0.26978	-2.17491	-0.67267	-1.02333	0.02835	-2.41633	-0.9141	-1.26475	-2.44468	-0.94244	-1.2931	1.50224	1.15158	-0.35066
chr11	33965592	33965601	-	chr11	33965221	33965713	CDS	Kcnmb1	0.25781	0.1671	0.06133	0.0613	0.7503	0.45784	0.36004	0.42984	1.17816	1.17844	-1.26236	-0.64908	-0.36779	0.74833	0.7486	-1.6922	-1.07892	-0.79763	0.00028	-2.44053	-1.82725	-1.54596	-2.4408	-1.82753	-1.54624	0.61328	0.89457	0.28129
chr4	53860212	53860221	+	chr4	53859947	53860332	stop_codon	Tmem38b	0.1424	0.10289	0.06398	0.04631	0.66888	0.22314	0.15103	0.26353	0.58073	0.75157	-1.68917	-0.4235	-0.05167	0.3172	0.48803	-1.95271	-0.68704	-0.31521	0.17084	-2.26991	-1.00423	-0.63241	-2.44074	-1.17507	-0.80324	1.26567	1.6375	0.37183
chr4	66827691	66827700	-	chr4	66827329	66828080	5UTR	Tlr4	0.11461	0.01344	0.04558	0.01676	0.50523	0.19998	0.1451	0.95565	0.57886	0.91185	-1.52118	-0.49441	-0.19659	-0.37679	-0.04381	-2.47683	-1.45006	-1.15224	0.33298	-2.10004	-1.07327	-0.77545	-2.43302	-1.40625	-1.10843	1.02677	1.32459	0.29782
chr9	106222606	106222615	-	chr9	106222230	106222748	5UTR	Tlr9	0.18183	0.06448	0.07525	0.07154	0.80101	0.11936	0.26666	0.79851	0.7038	0.73573	-1.69722	0.37011	-0.38655	-0.09471	-0.06278	-2.49573	-0.4284	-1.18506	0.03193	-2.40102	-0.33369	-1.09035	-2.43295	-0.36562	-1.12228	2.06733	1.31067	-0.75666
chr7	143180890	143180899	+	chr7	143180737	143181315	NA	NA	0.28959	0.23975	0.13164	0.10508	0.97935	0.20938	0.28777	0.20066	0.76488	0.94535	-1.48388	0.33819	0.00686	0.56423	0.74469	-1.68454	0.13753	-0.1938	0.18046	-2.24876	-0.42669	-0.75803	-2.42923	-0.60716	-0.93849	1.82207	1.49074	-0.33133
chr5	24687919	24687928	+	chr5	24687801	24688045	5UTR	Nub1	0.43602	0.20889	0.14216	0.15838	1.26306	0.49213	0.68216	0.80674	1.16544	1.0697	-1.35595	-0.14511	-0.55009	0.35869	0.26296	-2.16269	-0.95185	-1.35683	-0.09573	-2.52139	-1.31054	-1.71553	-2.42565	-1.21481	-1.61979	1.21084	0.80586	-0.40498
chr5	137631351	137631360	-	chr5	137631188	137631443	exon	Gm20605	0.97196	0.47714	0.33606	0.20443	1.5101	0.96392	0.73886	0.89994	1.30904	1.83582	-0.5895	0.01092	0.35591	0.4091	0.93588	-1.48944	-0.88902	-0.54403	0.52678	-1.89854	-1.29812	-0.95313	-2.42532	-1.8249	-1.47991	0.60042	0.94541	0.34499
chr2	79696190	79696199	-	chr2	79695943	79696343	NA	NA	0.13367	0.0493	0.03123	0.01545	0.49306	0.21088	0.24282	0.66697	0.86107	1.05496	-1.36559	-0.4209	-0.56452	0.1941	0.38799	-2.03257	-1.08787	-1.23149	0.19389	-2.22666	-1.28197	-1.42559	-2.42056	-1.47586	-1.61948	0.9447	0.80107	-0.14362
chr9	109914443	109914452	+	chr9	109914241	109914802	exon	Gm4644	0.10819	0.09136	0.02452	0.06455	0.75496	0.26397	0.22792	0.12522	0.76932	0.35028	-2.06863	-0.82335	-0.67033	0.6441	0.22506	-2.19385	-0.94857	-0.79555	-0.41904	-2.83795	-1.59268	-1.43965	-2.41891	-1.17363	-1.02061	1.24528	1.3983	0.15302
chr12	112860952	112860961	+	chr12	112860806	112861186	exon	Gm30461	0.47615	0.3249	0.12019	0.16158	1.26934	0.72368	0.56111	0.44451	1.4114	1.15679	-1.25736	-0.52	-0.20031	0.96689	0.71228	-1.70187	-0.96451	-0.64482	-0.25461	-2.66876	-1.9314	-1.61171	-2.41415	-1.67679	-1.3571	0.73736	1.05705	0.31969
chr13	92964345	92964354	-	chr13	92964168	92964652	NA	NA	0.13506	0.04376	0.04774	0.03906	0.61254	0.22186	0.17217	0.73253	0.69151	0.78251	-1.62398	-0.46313	-0.2164	-0.04102	0.04999	-2.35651	-1.19565	-0.94893	0.091	-2.31549	-1.15464	-0.90791	-2.4065	-1.24564	-0.99892	1.16085	1.40758	0.24672
chr15	25828678	25828687	-	chr15	25828454	25828905	NA	NA	0.10926	0.06138	0.05312	0.04437	0.64008	0.23439	0.2397	0.38698	0.46566	0.55396	-1.85133	-0.69141	-0.71453	0.07868	0.16698	-2.23831	-1.07839	-1.10151	0.08831	-2.31699	-1.15707	-1.18019	-2.40529	-1.24537	-1.2685	1.15992	1.1368	-0.02312
chr2	152881064	152881073	-	chr2	152880834	152881198	CDS	Tpx2	0.1029	0.0458	0.06094	0	0.40477	0.07157	0.169	0.49335	0.34526	1.06473	-1.3398	0.24968	-0.41714	-0.14809	0.57138	-1.83316	-0.24368	-0.91049	0.71947	-1.68506	-0.09558	-0.7624	-2.40453	-0.81505	-1.48187	1.58948	0.92266	-0.66682
chr6	54163043	54163052	-	chr6	54162754	54163262	NA	NA	0.16151	0.10982	0.05626	0.05984	0.71651	0.172	0.21554	0.32573	0.76493	0.73102	-1.66448	-0.05799	-0.2765	0.4392	0.40529	-1.99021	-0.38372	-0.60223	-0.03391	-2.42942	-0.82292	-1.04143	-2.3955	-0.78901	-1.00752	1.60649	1.38798	-0.21851
chr7	25006726	25006735	+	chr7	25006615	25006974	transcript	Atp1a3	0.07779	0.11464	0.03564	0.08731	0.85889	0.21959	0.1718	-0.28	0.40545	-0.0777	-2.46994	-0.86729	-0.62895	0.68545	0.2023	-2.18994	-0.58729	-0.34895	-0.48316	-2.8754	-1.27274	-1.03441	-2.39224	-0.78958	-0.55125	1.60266	1.84099	0.23833
chr18	80691962	80691971	+	chr18	80691451	80692196	CDS	Nfatc1	0.20228	0.1698	0.10002	0.10845	0.96885	0.26887	0.23028	0.16737	0.61011	0.54883	-1.84203	-0.29227	-0.13017	0.44275	0.38147	-2.00939	-0.45964	-0.29754	-0.06128	-2.45214	-0.90238	-0.74029	-2.39086	-0.8411	-0.67901	1.54976	1.71185	0.16209
chr14	64941746	64941755	+	chr14	64941550	64941930	5UTR	Hmbox1	0.06824	0.09327	0.04024	0.01703	0.48926	0.19431	0.185	-0.20669	0.27285	0.54616	-1.84441	-0.82852	-0.78121	0.47955	0.75285	-1.63771	-0.62183	-0.57451	0.2733	-2.11726	-1.10137	-1.05406	-2.39056	-1.37468	-1.32736	1.01589	1.0632	0.04731
chr10	7841994	7842003	-	chr10	7841460	7842287	exon	Zc3h12d	0.16835	0.14193	0.09318	0.04592	0.64074	0.22698	0.11144	0.15298	0.48652	0.90569	-1.48486	-0.29074	0.3524	0.33353	0.75271	-1.63784	-0.44372	0.19942	0.41917	-1.97137	-0.77725	-0.13412	-2.39055	-1.19643	-0.55329	1.19412	1.83725	0.64313
chr10	78087277	78087286	+	chr10	78086444	78087487	exon	Gm30039	0.14747	0.09	0.03731	0.08536	0.84678	0.26358	0.27351	0.39167	0.87762	0.42847	-1.9609	-0.56594	-0.60543	0.48594	0.0368	-2.35258	-0.95761	-0.9971	-0.44915	-2.83852	-1.44355	-1.48304	-2.38937	-0.99441	-1.0339	1.39497	1.35548	-0.03949
chr10	14207808	14207817	+	chr10	14207668	14207984	NA	NA	0.26305	0.17203	0.07249	0.03787	0.59582	0.21729	0.2161	0.42419	1.09954	1.43529	-0.94961	0.19772	0.20324	0.67534	1.0111	-1.3738	-0.22647	-0.22095	0.33575	-2.04914	-0.90182	-0.8963	-2.38489	-1.23757	-1.23205	1.14733	1.15285	0.00552
chr3	94851914	94851923	-	chr3	94851735	94852054	transcript	Pogz	0.45995	0.18937	0.07792	0.09838	0.91062	0.55137	0.34037	0.96645	1.68657	1.52457	-0.85853	-0.22028	0.35065	0.72013	0.55813	-1.82498	-1.18673	-0.6158	-0.162	-2.5451	-1.90685	-1.33592	-2.3831	-1.74485	-1.17392	0.63825	1.20918	0.57093
chr2	58183833	58183842	-	chr2	58183674	58184074	transcript	Gm13546	0.08738	0.04982	0.02234	0.01362	0.46823	0.14022	0.15051	0.33423	0.63956	0.75171	-1.6308	-0.3684	-0.43037	0.30533	0.41748	-1.96503	-0.70263	-0.7646	0.11215	-2.27036	-1.00796	-1.06992	-2.38251	-1.12011	-1.18207	1.2624	1.20043	-0.06196
chr12	21335972	21335981	+	chr12	21335816	21336206	CDS	Adam17	0.17246	0.17142	0.09124	0.04343	0.62111	0.30192	0.20457	0.00564	0.52393	0.95395	-1.4234	-0.57085	-0.164	0.51829	0.94832	-1.42903	-0.57648	-0.16964	0.43002	-1.94733	-1.09478	-0.68794	-2.37735	-1.5248	-1.11796	0.85255	1.25939	0.40684
chr1	88095062	88095071	-	chr1	88094894	88095298	5UTR	Ugt1a7c	0.14942	0.13873	0.07541	0.01664	0.481	0.14583	0.19872	0.06472	0.52228	1.1358	-1.23926	0.02141	-0.26582	0.45756	1.07108	-1.30398	-0.04331	-0.33055	0.61352	-1.76154	-0.50087	-0.78811	-2.37506	-1.11439	-1.40162	1.26067	0.97344	-0.28724
chr11	51577753	51577762	-	chr11	51577492	51577937	CDS	Col23a1	0.06962	0.04685	0.03424	0.03827	0.59317	0.22282	0.11771	0.21583	0.3509	0.30634	-2.06864	-0.95225	-0.37124	0.13506	0.09051	-2.28447	-1.16808	-0.58707	-0.04455	-2.41954	-1.30315	-0.72214	-2.37498	-1.25859	-0.67758	1.11639	1.6974	0.58101
chr19	25052433	25052442	-	chr19	25052279	25052785	5UTR	Dock8	0.28489	0.18699	0.08589	0.14578	1.15028	0.22144	0.31105	0.43093	1.07361	0.65952	-1.7148	0.26422	-0.09626	0.64268	0.22859	-2.14573	-0.16671	-0.52719	-0.4141	-2.78841	-0.80939	-1.16987	-2.37431	-0.39529	-0.75578	1.97902	1.61854	-0.36048
chr19	47133289	47133298	-	chr19	47132998	47133530	exon	Calhm2	0.48229	0.21147	0.12039	0.14837	1.16355	0.4002	0.36474	0.91521	1.4255	1.24872	-1.12541	0.2216	0.32896	0.51029	0.33351	-2.04062	-0.69361	-0.58625	-0.17678	-2.55091	-1.20391	-1.09654	-2.37413	-1.02713	-0.91976	1.34701	1.45437	0.10736
chr2	166630588	166630597	-	chr2	166630295	166630755	CDS	Prex1	0.18271	0.07645	0.0547	0.0512	0.6592	0.34638	0.21894	0.69821	0.89485	0.92915	-1.44383	-0.66989	-0.17736	0.19663	0.23094	-2.14205	-1.3681	-0.87558	0.0343	-2.33868	-1.56474	-1.07221	-2.37299	-1.59904	-1.10651	0.77394	1.26647	0.49253
chr6	50305195	50305204	-	chr6	50304968	50305497	CDS	Osbpl3	0.13407	0.08375	0.12188	0.095	0.8787	0.20948	0.31666	0.35918	0.07916	0.27076	-2.09131	-0.41173	-0.84777	-0.28002	-0.08842	-2.45049	-0.77091	-1.20695	0.19161	-2.17047	-0.49089	-0.92692	-2.36207	-0.6825	-1.11853	1.67958	1.24354	-0.43603
chr7	5101442	5101451	-	chr7	5101120	5101606	transcript	Epn1	0.13573	0.21863	0.0727	0.08537	0.8286	0.28021	0.22835	-0.4441	0.46209	0.35656	-2.00459	-0.7033	-0.48824	0.90619	0.80066	-1.56049	-0.2592	-0.04414	-0.10553	-2.46668	-1.1654	-0.95033	-2.36115	-1.05986	-0.8448	1.30128	1.51635	0.21507
chr16	91367342	91367351	-	chr16	91367116	91367458	exon	Gm36587	0.1978	0.10958	0.06446	0.06369	0.71431	0.40819	0.15328	0.51885	0.87982	0.88684	-1.46914	-0.78274	0.23861	0.36097	0.36799	-1.98799	-1.30158	-0.28024	0.00702	-2.34896	-1.66256	-0.64121	-2.35598	-1.66957	-0.64823	0.6864	1.70775	1.02135
chr1	191250309	191250318	-	chr1	191249892	191250383	NA	NA	0.16103	0.05342	0.07575	0.04424	0.61386	0.13222	0.21093	0.7897	0.58655	0.8823	-1.47189	0.17276	-0.25758	-0.20316	0.09259	-2.2616	-0.61694	-1.04728	0.29575	-2.05844	-0.41379	-0.84413	-2.35419	-0.70954	-1.13988	1.64465	1.21431	-0.43034
chr12	72361894	72361903	+	chr12	72361692	72362461	NA	NA	0.10773	0.03892	0.04457	0	0.38693	0.17901	0.06604	0.60094	0.541	1.09965	-1.25236	-0.43606	0.33353	-0.05995	0.4987	-1.85331	-1.03701	-0.26742	0.55865	-1.79336	-0.97706	-0.20747	-2.35201	-1.53571	-0.76612	0.8163	1.58589	0.76959
chr18	77837666	77837675	-	chr18	77837485	77838502	transcript	Pstpip2	0.20234	0.20559	0.09249	0.12794	1.03731	0.32748	0.21186	-0.01572	0.66744	0.41668	-1.93177	-0.50785	-0.04558	0.68316	0.4324	-1.91605	-0.49213	-0.02986	-0.25076	-2.59921	-1.17529	-0.71302	-2.34845	-0.92453	-0.46226	1.42392	1.88619	0.46227
chr2	26513455	26513464	-	chr2	26513033	26513829	transcript	Gm35978	0.0963	0.06816	0.08817	0.04089	0.59321	0.10664	0.20499	0.23053	0.06291	0.49571	-1.85111	-0.07624	-0.65113	-0.16762	0.26519	-2.08164	-0.30677	-0.88166	0.43281	-1.91401	-0.13914	-0.71404	-2.34682	-0.57195	-1.14685	1.77487	1.19997	-0.5749
chr8	122430414	122430423	-	chr8	122430308	122430600	CDS	Cyba	0.45623	0.33424	0.17752	0.15725	1.18111	0.55959	0.40282	0.36143	1.0183	1.13013	-1.21214	-0.24825	0.14724	0.65688	0.7687	-1.57357	-0.60968	-0.21419	0.11183	-2.23045	-1.26655	-0.87106	-2.34227	-1.37838	-0.98289	0.96389	1.35938	0.39549
chr17	3156470	3156479	-	chr17	3156007	3156554	exon	Gm6242	0.19516	0.20426	0.0796	0.11983	0.98806	0.42964	0.29851	-0.04466	0.73527	0.43496	-1.90293	-0.85615	-0.44053	0.77994	0.47963	-1.85826	-0.81148	-0.39587	-0.30031	-2.6382	-1.59142	-1.1758	-2.33789	-1.29111	-0.8755	1.04678	1.46239	0.41562
chr3	90603785	90603794	-	chr3	90603528	90604098	5UTR	S100a4	0.43692	0.21914	0.18125	0.13419	1.05659	0.4404	0.55331	0.76121	0.94712	1.21736	-1.11544	-0.00942	-0.28584	0.18591	0.45614	-1.87666	-0.77064	-1.04705	0.27024	-2.06256	-0.95654	-1.23296	-2.3328	-1.22678	-1.5032	1.10602	0.8296	-0.27642
chr7	122310360	122310369	+	chr7	122310052	122310825	NA	NA	0.12929	0.08881	0.02074	0.03865	0.57515	0.2063	0.19766	0.28822	0.95902	0.75019	-1.58234	-0.42707	-0.38499	0.67081	0.46198	-1.87055	-0.71529	-0.67321	-0.20883	-2.54136	-1.3861	-1.34402	-2.33253	-1.17726	-1.13518	1.15526	1.19734	0.04208
chr6	113330766	113330775	+	chr6	113330638	113330891	transcript	Ogg1	0.65903	0.80912	0.2504	0.27128	1.73442	0.97843	0.80764	-0.26213	1.12805	1.0432	-1.27954	-0.50996	-0.25977	1.39018	1.30533	-1.01741	-0.24783	0.00237	-0.08486	-2.40759	-1.63802	-1.38782	-2.32273	-1.55316	-1.30296	0.76957	1.01977	0.2502
chr9	120054974	120054983	-	chr9	120054660	120055430	transcript	Cx3cr1	0.10879	0.06763	0.05528	0.02135	0.48302	0.25727	0.33243	0.32684	0.44133	0.81262	-1.50748	-0.79184	-1.07139	0.11449	0.48578	-1.83432	-1.11868	-1.39823	0.37129	-1.94881	-1.23317	-1.51272	-2.3201	-1.60447	-1.88401	0.71564	0.43609	-0.27955
chr9	107624794	107624803	+	chr9	107624622	107624896	transcript	Gnai2	0.72453	0.54998	0.17919	0.14333	1.08971	0.65383	0.40694	0.3459	1.58225	1.78506	-0.53207	0.13028	0.70812	1.23635	1.43916	-0.87797	-0.21562	0.36222	0.20281	-2.11432	-1.45197	-0.87413	-2.31714	-1.65478	-1.07694	0.66236	1.24019	0.57783
chr9	59545019	59545028	+	chr9	59544761	59545198	exon	Hexa	0.10591	0.07184	0.05868	0.04928	0.62078	0.28828	0.18047	0.26919	0.38828	0.4798	-1.83685	-0.93442	-0.45681	0.11909	0.21061	-2.10604	-1.20361	-0.726	0.09152	-2.22513	-1.3227	-0.84509	-2.31665	-1.41422	-0.93661	0.90243	1.38004	0.47761
chr9	63678294	63678303	+	chr9	63678160	63678473	transcript	Smad3	0.12181	0.19399	0.14489	0	0.37512	0.13465	0.24738	-0.41584	-0.14642	1.19687	-1.11929	-0.08329	-0.661	0.26942	1.61271	-0.70346	0.33255	-0.24516	1.34329	-0.97287	0.06314	-0.51458	-2.31616	-1.28015	-1.85787	1.03601	0.45829	-0.57772
chr16	31210042	31210051	+	chr16	31209547	31210342	NA	NA	0.52473	0.2827	0.15718	0.12862	1.01398	0.4348	0.43058	0.71552	1.29974	1.47369	-0.84029	0.22649	0.23804	0.58422	0.75817	-1.55581	-0.48903	-0.47748	0.17395	-2.14003	-1.07325	-1.06169	-2.31398	-1.2472	-1.23565	1.06678	1.07834	0.01155
chr7	98427338	98427347	-	chr7	98427119	98427672	NA	NA	0.06774	0.10725	0.04872	0.03065	0.52666	0.16184	0.11472	-0.31488	0.18019	0.37513	-1.93848	-0.66075	-0.36739	0.49507	0.69001	-1.6236	-0.34587	-0.05252	0.19494	-2.11867	-0.84094	-0.54758	-2.31361	-1.03588	-0.74252	1.27773	1.57109	0.29336
chr1	93071683	93071692	-	chr1	93071228	93071856	CDS	Kif1a	0.13266	0.09147	0.09254	0.04695	0.60584	0.25961	0.19674	0.28899	0.2807	0.68438	-1.62542	-0.64106	-0.35885	-0.00829	0.39539	-1.91441	-0.93005	-0.64784	0.40368	-1.90612	-0.92176	-0.63955	-2.3098	-1.32544	-1.04323	0.98436	1.26657	0.28221
chr2	26360915	26360924	-	chr2	26360780	26361245	transcript	Card9	0.1452	0.18685	0.23725	0.11792	0.95689	0.29293	0.306	-0.23136	-0.46928	0.1745	-2.13416	-0.69328	-0.74118	-0.23793	0.40586	-1.9028	-0.46192	-0.50982	0.64379	-1.66487	-0.224	-0.27189	-2.30866	-0.86778	-0.91568	1.44088	1.39298	-0.0479
chr1	132341843	132341852	+	chr1	132341613	132342449	exon	F730311O21Rik	0.27986	0.20102	0.14101	0.09167	0.82593	0.33181	0.25603	0.34143	0.66921	1.00878	-1.29845	-0.18759	0.09495	0.32778	0.66735	-1.63988	-0.52902	-0.24647	0.33957	-1.96766	-0.8568	-0.57425	-2.30723	-1.19637	-0.91383	1.11086	1.39341	0.28255
chr17	34293662	34293671	-	chr17	34293446	34293931	NA	NA	0.14885	0.0874	0.03621	0.06107	0.67385	0.18899	0.28828	0.42039	0.89794	0.64631	-1.65974	-0.22048	-0.65402	0.47755	0.22592	-2.08013	-0.64086	-1.07441	-0.25164	-2.55769	-1.11842	-1.55197	-2.30605	-0.86678	-1.30033	1.43927	1.00572	-0.43355
chr2	129596141	129596150	-	chr2	129595668	129596270	exon	Sirpa	0.14138	0.07599	0.08987	0.02007	0.47084	0.20708	0.19729	0.46895	0.35588	1.04345	-1.26196	-0.35482	-0.30717	-0.11308	0.57449	-1.73091	-0.82377	-0.77612	0.68757	-1.61783	-0.7107	-0.66305	-2.3054	-1.39827	-1.35062	0.90714	0.95479	0.04765
chr8	92818332	92818341	+	chr8	92818103	92818614	NA	NA	0.48756	0.65462	0.17908	0.19515	1.33609	0.68012	0.43898	-0.36417	1.0899	1.00748	-1.29774	-0.41247	0.12579	1.45407	1.37165	-0.93357	-0.04831	0.48996	-0.08242	-2.38764	-1.50238	-0.96411	-2.30522	-1.41996	-0.88169	0.88526	1.42353	0.53827
chr3	79253352	79253361	+	chr3	79252691	79253707	exon	4921511C10Rik	0.18416	0.19606	0.13926	0.04828	0.60848	0.23148	0.28544	-0.06038	0.25373	0.96595	-1.33576	-0.22647	-0.44761	0.31411	1.02633	-1.27538	-0.16608	-0.38723	0.71222	-1.58949	-0.48019	-0.70134	-2.3017	-1.19241	-1.41356	1.10929	0.88815	-0.22115
chr17	12656041	12656050	-	chr17	12655763	12656155	CDS	Slc22a1	0.10794	0.1297	0.05384	0.02882	0.51237	0.23863	0.1576	-0.14747	0.44924	0.71623	-1.58508	-0.71929	-0.31685	0.5967	0.8637	-1.43762	-0.57183	-0.16939	0.267	-2.03432	-1.16853	-0.76609	-2.30131	-1.43552	-1.03309	0.86579	1.26823	0.40244
chr4	40781314	40781323	+	chr4	40780905	40781565	transcript	Gm34213	0.38738	0.2994	0.1937	0.11442	0.93412	0.66271	0.29671	0.29101	0.74211	1.2067	-1.09436	-0.65229	0.3009	0.4511	0.91569	-1.38537	-0.9433	0.00989	0.4646	-1.83647	-1.3944	-0.4412	-2.30106	-1.85899	-0.9058	0.44207	1.39527	0.9532
chr5	98017038	98017047	-	chr5	98016448	98017145	exon	Gm34226	0.2101	0.13917	0.07554	0.06119	0.67041	0.28509	0.26275	0.3828	0.84198	0.96937	-1.32909	-0.31776	-0.23019	0.45918	0.58657	-1.71189	-0.70056	-0.613	0.12739	-2.17107	-1.15974	-1.07217	-2.29846	-1.28713	-1.19957	1.01133	1.09889	0.08757
chr15	77800725	77800734	+	chr15	77800527	77801129	transcript	Myh9	0.69077	0.41191	0.2691	0.18844	1.29449	0.67378	0.65371	0.63314	1.11137	1.47351	-0.82298	0.03157	0.06977	0.47823	0.84037	-1.45611	-0.60157	-0.56337	0.36214	-1.93434	-1.0798	-1.0416	-2.29648	-1.44194	-1.40374	0.85454	0.89274	0.0382
chr4	133841247	133841256	+	chr4	133841062	133841361	3UTR	Rps6ka1	0.22132	0.25308	0.22692	0.08365	0.77903	0.38059	0.36118	-0.13835	-0.02538	0.82689	-1.46848	-0.58948	-0.52927	0.11297	0.96524	-1.33014	-0.45113	-0.39092	0.85227	-1.44311	-0.5641	-0.50389	-2.29538	-1.41637	-1.35616	0.879	0.93921	0.06021
chr1	193201643	193201652	-	chr1	193201029	193201785	transcript	Traf3ip3	0.36677	0.18222	0.16469	0.10796	0.89799	0.49995	0.37592	0.73771	0.83221	1.18897	-1.10586	-0.36612	-0.02835	0.09451	0.45127	-1.84357	-1.10383	-0.76606	0.35676	-1.93807	-1.19833	-0.86056	-2.29483	-1.55509	-1.21733	0.73974	1.07751	0.33777
chr10	85194664	85194673	+	chr10	85194534	85194858	NA	NA	0.12979	0.0003	0.05042	0.04483	0.58626	0.1612	0.15642	1.24461	0.63099	0.68784	-1.60286	-0.18928	-0.16203	-0.61362	-0.55677	-2.84747	-1.43389	-1.40664	0.05685	-2.23385	-0.82028	-0.79302	-2.2907	-0.87713	-0.84987	1.41358	1.44083	0.02725
chr1	35813825	35813834	+	chr1	35813584	35814119	NA	NA	0.28052	0.21957	0.08385	0.10478	0.87205	0.34706	0.30125	0.25607	1.07332	0.91302	-1.36647	-0.23579	-0.07767	0.81725	0.65695	-1.62253	-0.49186	-0.33374	-0.1603	-2.43978	-1.3091	-1.15099	-2.27949	-1.14881	-0.99069	1.13068	1.28879	0.15811
chr9	110676781	110676790	-	chr9	110676431	110677003	NA	NA	0.18464	0.15592	0.11362	0.0823	0.76289	0.23134	0.24081	0.15679	0.42401	0.65962	-1.61983	-0.22336	-0.26472	0.26723	0.50283	-1.77662	-0.38015	-0.42151	0.2356	-2.04385	-0.64737	-0.68874	-2.27945	-0.88298	-0.92434	1.39647	1.35511	-0.04136
chr1	162565206	162565215	+	chr1	162564846	162565434	NA	NA	0.43758	0.21304	0.22002	0.10758	0.88532	0.48209	0.45368	0.79136	0.75896	1.39782	-0.88118	-0.11595	-0.04303	-0.0324	0.60646	-1.67255	-0.90732	-0.83439	0.63886	-1.64014	-0.87492	-0.80199	-2.27901	-1.51378	-1.44085	0.76523	0.83816	0.07293
chr5	77468681	77468690	-	chr5	77468369	77468869	exon	1700017L05Rik	0.25615	0.21057	0.22268	0.12779	0.98071	0.31687	0.29456	0.20105	0.14484	0.65818	-1.61721	-0.23056	-0.15006	-0.05621	0.45714	-1.81825	-0.4316	-0.35111	0.51334	-1.76205	-0.3754	-0.2949	-2.27539	-0.88874	-0.80825	1.38665	1.46715	0.08049
chr11	61602957	61602966	-	chr11	61602624	61603215	NA	NA	0.66232	0.19882	0.1478	0.12958	0.98711	0.71165	0.54414	1.36823	1.64417	1.75707	-0.5153	-0.09113	0.24504	0.27594	0.38884	-1.88353	-1.45936	-1.12319	0.1129	-2.15947	-1.7353	-1.39913	-2.27237	-1.8482	-1.51203	0.42417	0.76034	0.33616
chr4	150202918	150202927	-	chr4	150202734	150203283	NA	NA	0.11359	0.11371	0.10504	0.0235	0.47434	0.18039	0.15832	-0.00083	0.0606	0.81975	-1.45192	-0.40207	-0.28121	0.06144	0.82058	-1.45108	-0.40124	-0.28038	0.75914	-1.51252	-0.46267	-0.34181	-2.27166	-1.22181	-1.10096	1.04985	1.17071	0.12086
chr7	46712413	46712422	+	chr7	46712293	46712586	CDS	Saa3	0.13712	0.06586	0.09845	0.11012	0.89238	0.29628	0.20534	0.53114	0.26385	0.17902	-2.09231	-0.75523	-0.37279	-0.26729	-0.35212	-2.62345	-1.28637	-0.90393	-0.08483	-2.35615	-1.01908	-0.63663	-2.27133	-0.93425	-0.55181	1.33708	1.71952	0.38244
chr17	12656023	12656032	-	chr17	12655763	12656155	CDS	Slc22a1	0.12151	0.1297	0.04816	0.02899	0.5003	0.20925	0.14358	-0.05375	0.59938	0.80796	-1.46237	-0.49227	-0.1405	0.65313	0.86171	-1.40862	-0.43852	-0.08675	0.20858	-2.06175	-1.09165	-0.73988	-2.27033	-1.30023	-0.94846	0.9701	1.32187	0.35177
chr14	57730101	57730110	+	chr14	57729545	57730275	CDS	Lats2	0.11579	0.08775	0.0744	0.02449	0.47857	0.12566	0.25439	0.20673	0.31663	0.82286	-1.44742	-0.06625	-0.73107	0.10991	0.61613	-1.65414	-0.27297	-0.9378	0.50623	-1.76405	-0.38288	-1.04771	-2.27028	-0.88911	-1.55393	1.38117	0.71634	-0.66482
chr6	48841435	48841444	+	chr6	48840977	48841615	transcript	Tmem176b	0.15908	0.04601	0.03958	0.07235	0.70901	0.26929	0.16705	0.85291	0.92062	0.60463	-1.66485	-0.5211	-0.04469	0.0677	-0.24828	-2.51776	-1.37401	-0.8976	-0.31599	-2.58547	-1.44171	-0.96531	-2.26948	-1.12573	-0.64932	1.14375	1.62016	0.47641
chr7	98534821	98534830	-	chr7	98534260	98534992	NA	NA	0.15532	0.09122	0.05103	0.04279	0.56572	0.23699	0.26191	0.42826	0.78061	0.86485	-1.40296	-0.40843	-0.51308	0.35235	0.43659	-1.83121	-0.83669	-0.94134	0.08424	-2.18356	-1.18904	-1.29369	-2.2678	-1.27328	-1.37793	0.99452	0.88987	-0.10465
chr11	103175259	103175268	+	chr11	103174780	103175356	exon	Fmnl1	0.3261	0.37445	0.19786	0.15411	1.10143	0.50223	0.40852	-0.15707	0.52508	0.75916	-1.50817	-0.50488	-0.25831	0.68215	0.91623	-1.35109	-0.34781	-0.10123	0.23408	-2.03325	-1.02996	-0.78339	-2.26733	-1.26404	-1.01747	1.00329	1.24986	0.24658
chr11	53184842	53184851	-	chr11	53184703	53185232	CDS	Fstl4	0.11249	0.04813	0.04466	0.04449	0.57351	0.20319	0.13672	0.53807	0.57367	0.57543	-1.69151	-0.52478	-0.15989	0.0356	0.03736	-2.22958	-1.06285	-0.69796	0.00177	-2.26518	-1.09845	-0.73356	-2.26695	-1.10021	-0.73532	1.16673	1.53162	0.36489
chr3	89911272	89911281	-	chr3	89911133	89911661	CDS	Il6ra	0.09734	0.07642	0.11055	0.06023	0.64885	0.10905	0.16025	0.16681	-0.09619	0.3106	-1.95553	-0.08559	-0.40964	-0.26301	0.14379	-2.12235	-0.2524	-0.57646	0.4068	-1.85934	0.01061	-0.31345	-2.26614	-0.39619	-0.72025	1.86995	1.54589	-0.32406
chr17	31835927	31835936	-	chr17	31835481	31836119	exon	Gm41564	0.06914	0.05738	0.08167	0.08087	0.74726	0.19495	0.17549	0.10776	-0.1066	-0.10002	-2.36466	-0.82375	-0.72325	-0.21436	-0.20779	-2.47243	-0.93151	-0.83101	0.00658	-2.25806	-0.71715	-0.61665	-2.26464	-0.72372	-0.62323	1.54091	1.64141	0.1005
chr2	38514622	38514631	-	chr2	38514451	38514810	5UTR	Nek6	0.1247	0.08907	0.05222	0.03795	0.54086	0.17846	0.17205	0.25624	0.58	0.72788	-1.53641	-0.31677	-0.28245	0.32376	0.47164	-1.79264	-0.573	-0.53869	0.14788	-2.1164	-0.89676	-0.86245	-2.26428	-1.04465	-1.01033	1.21964	1.25395	0.03432
chr2	38514610	38514619	-	chr2	38514451	38514810	5UTR	Nek6	0.1247	0.08681	0.05222	0.03826	0.54086	0.17846	0.17205	0.27413	0.58	0.7245	-1.53641	-0.31677	-0.28245	0.30586	0.45037	-1.81054	-0.5909	-0.55658	0.1445	-2.1164	-0.89676	-0.86245	-2.26091	-1.04127	-1.00695	1.21964	1.25395	0.03432
chr9	96399736	96399745	+	chr9	96399341	96399878	transcript	Gm40550	0.21416	0.16698	0.08481	0.05069	0.59986	0.33659	0.22991	0.23953	0.78441	1.08939	-1.17031	-0.4823	-0.07186	0.54488	0.84986	-1.40984	-0.72183	-0.31139	0.30499	-1.95472	-1.26671	-0.85626	-2.25971	-1.5717	-1.16125	0.68801	1.09846	0.41045
chr7	81863361	81863370	+	chr7	81863238	81863514	5UTR	Tm6sf1	0.27812	0.12157	0.06938	0.09857	0.82805	0.32958	0.30187	0.78691	1.1863	0.94948	-1.3085	-0.18675	-0.0892	0.39939	0.16257	-2.09541	-0.97366	-0.87611	-0.23682	-2.4948	-1.37305	-1.2755	-2.25798	-1.13623	-1.03868	1.12175	1.2193	0.09755
chr6	113330778	113330787	-	chr6	113330638	113330891	transcript	Ogg1	0.68812	0.80912	0.2504	0.28831	1.73442	0.97843	0.82909	-0.20747	1.18272	1.03217	-1.22487	-0.4553	-0.23901	1.39018	1.23963	-1.01741	-0.24783	-0.03154	-0.15055	-2.40759	-1.63802	-1.42173	-2.25704	-1.48746	-1.27118	0.76957	0.98586	0.21629
chr7	142460782	142460791	+	chr7	142460554	142461106	5UTR	Lsp1	0.13664	0.04373	0.05535	0.04487	0.57065	0.10588	0.12339	0.74275	0.6261	0.73088	-1.52593	0.20627	0.08526	-0.11665	-0.01187	-2.26868	-0.53648	-0.65748	0.10478	-2.15203	-0.41983	-0.54083	-2.25681	-0.52461	-0.64561	1.7322	1.61119	-0.12101
chr9	70260457	70260466	-	chr9	70260295	70260690	exon	Myo1e	0.0776	0.07753	0.01769	0.00102	0.36054	0.24949	0.12121	0.00059	0.61842	0.85106	-1.40405	-1.00017	-0.32627	0.61784	0.85047	-1.40464	-1.00076	-0.32686	0.23263	-2.02247	-1.61859	-0.94469	-2.25511	-1.85122	-1.17733	0.40388	1.07778	0.6739
chr1	64925818	64925827	-	chr1	64925691	64926066	5UTR	Plekhm3	0.05155	0.08712	0.01835	0.07463	0.71125	0.13864	0.18055	-0.31495	0.37278	-0.21201	-2.46589	-0.67566	-0.91439	0.68773	0.10294	-2.15095	-0.36071	-0.59945	-0.58479	-2.83868	-1.04844	-1.28718	-2.25389	-0.46365	-0.70238	1.79024	1.5515	-0.23873
chr13	104606992	104607001	+	chr13	104606819	104607126	NA	NA	0.13726	0.16208	0.08871	0.04346	0.5625	0.29244	0.15451	-0.14693	0.33955	0.74944	-1.50427	-0.7401	-0.10368	0.48647	0.89637	-1.35734	-0.59318	0.04325	0.40989	-1.84382	-1.07965	-0.44323	-2.25371	-1.48954	-0.85312	0.76417	1.40059	0.63642
chr11	76588156	76588165	-	chr11	76587061	76588406	NA	NA	0.07507	0.056	0.06909	0.09221	0.79475	0.3255	0.26341	0.17239	0.05187	-0.13911	-2.39243	-1.30978	-1.07884	-0.12051	-0.3115	-2.56482	-1.48217	-1.25122	-0.19099	-2.44431	-1.36165	-1.13071	-2.25332	-1.17066	-0.93972	1.08265	1.31359	0.23094
chr4	135053826	135053835	+	chr4	135053583	135053973	NA	NA	0.14135	0.05117	0.03994	0.02955	0.49497	0.24929	0.19529	0.69611	0.81206	0.92833	-1.32247	-0.54414	-0.29742	0.11595	0.23221	-2.01858	-1.24025	-0.99354	0.11627	-2.13453	-1.3562	-1.10949	-2.2508	-1.47247	-1.22575	0.77833	1.02504	0.24672
chr10	96751668	96751677	-	chr10	96751577	96751882	NA	NA	0.29988	0.11725	0.05502	0.09529	0.80725	0.26019	0.24441	0.89801	1.40075	1.05617	-1.19366	0.15313	0.21883	0.50273	0.15816	-2.09167	-0.74488	-0.67918	-0.34458	-2.5944	-1.24762	-1.18191	-2.24983	-0.90304	-0.83734	1.34679	1.41249	0.0657
chr10	59221786	59221795	+	chr10	59221190	59222431	5UTR	Sowahc	0.53305	0.57795	0.38707	0.33047	1.92528	0.70047	0.75762	-0.09973	0.38216	0.56264	-1.68679	-0.34129	-0.44148	0.48189	0.66238	-1.58706	-0.24156	-0.34174	0.18048	-2.06895	-0.72345	-0.82364	-2.24944	-0.90393	-1.00412	1.3455	1.24531	-0.10019
chr2	68825516	68825525	-	chr2	68824926	68825903	transcript	Gm36174	0.07559	0.06038	0.08693	0.03289	0.50909	0.18906	0.18758	0.13536	-0.09325	0.41776	-1.82879	-0.73821	-0.73065	-0.2286	0.2824	-1.96415	-0.87356	-0.866	0.51101	-1.73555	-0.64496	-0.6374	-2.24655	-1.15596	-1.14841	1.09059	1.09815	0.00756
chr13	81136753	81136762	-	chr13	81136609	81137336	transcript	Gm32639	0.12639	0.1368	0.0575	0.02698	0.47992	0.14591	0.17373	-0.06651	0.54	0.86395	-1.37978	-0.1223	-0.28043	0.60651	0.93046	-1.31327	-0.05579	-0.21392	0.32395	-1.91978	-0.6623	-0.82043	-2.24373	-0.98625	-1.14438	1.25748	1.09935	-0.15813
chr1	184441449	184441458	+	chr1	184440968	184441632	NA	NA	0.1101	0.04035	0.0316	0.02962	0.49207	0.15727	0.18696	0.60236	0.69934	0.72222	-1.52065	-0.29963	-0.46061	0.09697	0.11985	-2.12301	-0.90199	-1.06297	0.02288	-2.21998	-0.99897	-1.15994	-2.24286	-1.02185	-1.18282	1.22102	1.06004	-0.16097
chr11	51931903	51931912	-	chr11	51931566	51932201	NA	NA	0.23853	0.16198	0.08973	0.08442	0.75135	0.45504	0.26571	0.37713	0.85502	0.89727	-1.34541	-0.723	-0.11327	0.47789	0.52014	-1.72254	-1.10013	-0.4904	0.04225	-2.20043	-1.57802	-0.96829	-2.24268	-1.62027	-1.01054	0.62241	1.23214	0.60973
chr11	115692990	115692999	+	chr11	115692838	115693229	CDS	Grb2	0.28997	0.13558	0.12065	0.08542	0.75521	0.25912	0.32398	0.74137	0.83827	1.09658	-1.14461	0.12075	-0.12236	0.0969	0.35522	-1.88598	-0.62061	-0.86373	0.25832	-1.98288	-0.71751	-0.96063	-2.2412	-0.97583	-1.21895	1.26537	1.02225	-0.24312
chr8	72008490	72008499	+	chr8	72008160	72008759	exon	Gm51535	0.10535	0.11995	0.06508	0.02216	0.45444	0.16327	0.15455	-0.10185	0.32509	0.7779	-1.45888	-0.36757	-0.31787	0.42694	0.87974	-1.35703	-0.26573	-0.21603	0.4528	-1.78397	-0.69267	-0.64297	-2.23678	-1.14547	-1.09577	1.09131	1.141	0.0497
chr4	47011160	47011169	-	chr4	47010785	47011310	3UTR	Anks6	0.08248	0.04198	0.02293	0	0.34941	0.15776	0.12442	0.3755	0.59282	0.90698	-1.32791	-0.51193	-0.30721	0.21732	0.53148	-1.70341	-0.88744	-0.68271	0.31416	-1.92073	-1.10475	-0.90003	-2.23489	-1.41892	-1.21419	0.81597	1.0207	0.20473
chr14	118431711	118431720	-	chr14	118431466	118432003	NA	NA	0.14631	0.06074	0.03093	0.03305	0.50478	0.12228	0.10954	0.63422	0.94239	0.91816	-1.31623	0.15183	0.23931	0.30817	0.28394	-1.95045	-0.48239	-0.39491	-0.02423	-2.25862	-0.79056	-0.70308	-2.2344	-0.76633	-0.67885	1.46806	1.55554	0.08748
chr11	32542816	32542825	+	chr11	32542653	32543371	5UTR	Stk10	0.28161	0.24706	0.14448	0.11813	0.90505	0.40343	0.29688	0.13911	0.65482	0.82355	-1.41072	-0.40502	-0.05745	0.5157	0.68443	-1.54984	-0.54414	-0.19657	0.16873	-2.06554	-1.05984	-0.71227	-2.23427	-1.22857	-0.881	1.0057	1.35327	0.34757
chr13	95685900	95685909	-	chr13	95685753	95686070	exon	Gm48745	0.11838	0.14298	0.09283	0.07779	0.71486	0.19907	0.21649	-0.15794	0.18469	0.3056	-1.92799	-0.46413	-0.54736	0.34263	0.46354	-1.77005	-0.30619	-0.38942	0.12091	-2.11268	-0.64882	-0.73205	-2.23359	-0.76973	-0.85296	1.46386	1.38063	-0.08323
chr17	29395403	29395412	-	chr17	29395314	29395758	NA	NA	0.24222	0.13393	0.07336	0.11536	0.88974	0.51284	0.35518	0.56031	1.00537	0.68277	-1.54817	-0.85143	-0.41762	0.44506	0.12246	-2.10847	-1.41174	-0.97792	-0.3226	-2.55354	-1.8568	-1.42299	-2.23094	-1.5342	-1.10039	0.69673	1.13055	0.43381
chr12	85629892	85629901	-	chr12	85629535	85630274	NA	NA	0.31018	0.15993	0.09833	0.07069	0.67959	0.32945	0.28178	0.67004	1.07043	1.29395	-0.93615	-0.06715	0.10504	0.40039	0.62391	-1.60618	-0.73719	-0.565	0.22352	-2.00658	-1.13759	-0.96539	-2.23009	-1.3611	-1.18891	0.86899	1.04119	0.1722
chr11	59418954	59418963	-	chr11	59418279	59419058	CDS	Snap47	0.1567	0.18798	0.05527	0.08168	0.72994	0.28959	0.17826	-0.16947	0.74706	0.5124	-1.71558	-0.61311	-0.11891	0.91653	0.68187	-1.54611	-0.44363	0.05056	-0.23466	-2.46264	-1.36017	-0.86597	-2.22798	-1.1255	-0.63131	1.10247	1.59667	0.4942
chr9	21909629	21909638	-	chr9	21909153	21909808	exon	Rab3d	0.07651	0.14146	0.0492	0.02406	0.45995	0.20751	0.18037	-0.46504	0.25142	0.5294	-1.69844	-0.82143	-0.68547	0.71646	0.99444	-1.23339	-0.35639	-0.22042	0.27798	-1.94986	-1.07285	-0.93689	-2.22783	-1.35083	-1.21486	0.87701	1.01297	0.13596
chr9	61983368	61983377	+	chr9	61983282	61983614	transcript	Gm35152	0.21276	0.09724	0.07005	0.06072	0.63125	0.19389	0.17602	0.68102	0.90195	0.9863	-1.24069	0.09152	0.18388	0.22094	0.30528	-1.92171	-0.5895	-0.49713	0.08434	-2.14264	-0.81044	-0.71807	-2.22699	-0.89478	-0.80241	1.33221	1.42457	0.09237
chr13	55369723	55369732	-	chr13	55368895	55370553	exon	Rgs14	0.84756	0.66507	0.39376	0.26434	1.58276	0.96089	0.77936	0.31073	0.94853	1.3931	-0.83238	-0.16393	0.10845	0.6378	1.08237	-1.14311	-0.47465	-0.20228	0.44458	-1.78091	-1.11245	-0.84008	-2.22548	-1.55703	-1.28465	0.66846	0.94083	0.27237
chr5	77293013	77293022	-	chr5	77292837	77293136	3UTR	Noa1	0.0796	0.06054	0.04878	0.02863	0.47976	0.20354	0.15456	0.16753	0.28153	0.50059	-1.72323	-0.77645	-0.5172	0.11399	0.33306	-1.89076	-0.94398	-0.68473	0.21907	-2.00476	-1.05798	-0.79873	-2.22383	-1.27705	-1.01779	0.94678	1.20603	0.25925
chr14	74937036	74937045	-	chr14	74936409	74937336	NA	NA	0.32102	0.22468	0.15788	0.13245	0.96404	0.32902	0.38597	0.38081	0.71988	0.87327	-1.34961	-0.02753	-0.20965	0.33907	0.49246	-1.73042	-0.40834	-0.59046	0.15338	-2.0695	-0.74741	-0.92953	-2.22288	-0.90079	-1.08291	1.32208	1.13997	-0.18212
chr7	118492035	118492044	+	chr7	118491049	118492143	5UTR	Itpripl2	0.39616	0.20297	0.1157	0.13795	0.98968	0.63633	0.45929	0.72246	1.22394	1.07862	-1.14421	-0.57505	-0.1747	0.50149	0.35616	-1.86667	-1.29751	-0.89716	-0.14532	-2.36815	-1.799	-1.39864	-2.22283	-1.65367	-1.25332	0.56916	0.96951	0.40035
chr4	126537043	126537052	-	chr4	126536863	126537248	NA	NA	0.23229	0.13806	0.05335	0.06685	0.65766	0.17079	0.13444	0.49121	1.14557	1.0193	-1.2033	0.30105	0.51387	0.65436	0.52809	-1.69451	-0.19016	0.02266	-0.12626	-2.34887	-0.84452	-0.6317	-2.2226	-0.71825	-0.50544	1.50435	1.71717	0.21282
chr11	83040543	83040552	+	chr11	83039860	83040754	transcript	Slfn10-ps	0.58925	0.34147	0.16158	0.14926	1.04184	0.50958	0.63363	0.64954	1.41776	1.48896	-0.73306	0.1788	-0.09076	0.76822	0.83942	-1.3826	-0.47074	-0.7403	0.0712	-2.15082	-1.23896	-1.50852	-2.22202	-1.31016	-1.57972	0.91186	0.6423	-0.26956
chr7	80830655	80830664	-	chr7	80830397	80830873	NA	NA	0.24196	0.09095	0.09587	0.09514	0.78929	0.31776	0.35769	0.86028	0.82245	0.828	-1.39393	-0.29332	-0.42677	-0.03783	-0.03228	-2.25421	-1.1536	-1.28705	0.00555	-2.21639	-1.11577	-1.24922	-2.22194	-1.12132	-1.25477	1.10062	0.96716	-0.13345
chr11	75571371	75571380	+	chr11	75571159	75571714	CDS	Slc43a2	0.18173	0.16643	0.10302	0.11604	0.88569	0.41619	0.33748	0.08228	0.48439	0.39218	-1.82813	-0.88718	-0.64557	0.40211	0.3099	-1.91041	-0.96946	-0.72785	-0.09221	-2.31252	-1.37157	-1.12996	-2.22031	-1.27936	-1.03775	0.94095	1.18256	0.24161
chr17	17587483	17587492	-	chr17	17587330	17587630	NA	NA	0.22424	0.16913	0.09687	0.06565	0.65075	0.25968	0.32032	0.2741	0.73677	0.99408	-1.22599	-0.15222	-0.38037	0.46267	0.71998	-1.50009	-0.42632	-0.65447	0.25731	-1.96276	-0.88899	-1.11714	-2.22007	-1.14629	-1.37445	1.07378	0.84562	-0.22815
chr11	106957574	106957583	+	chr11	106957391	106957896	NA	NA	0.11282	0.14588	0.08128	0.04049	0.53276	0.15344	0.16338	-0.2137	0.2384	0.61994	-1.59837	-0.25842	-0.31518	0.4521	0.83364	-1.38467	-0.04472	-0.10148	0.38154	-1.83677	-0.49682	-0.55358	-2.21831	-0.87836	-0.93512	1.33995	1.28319	-0.05676
chr13	110903468	110903477	-	chr13	110903160	110903570	exon	Gm38397	0.11282	0.0619	0	0.02286	0.44881	0.16795	0.13699	0.40719	1.13555	0.82225	-1.39099	-0.34055	-0.15927	0.72837	0.41507	-1.79818	-0.74774	-0.56646	-0.3133	-2.52655	-1.4761	-1.29483	-2.21325	-1.1628	-0.98153	1.05044	1.23172	0.18128
chr9	111046421	111046430	-	chr9	111046316	111046611	transcript	Ltf	0.09745	0.09417	0.08268	0.04089	0.53237	0.16583	0.14978	0.0249	0.11567	0.5044	-1.70874	-0.44011	-0.34821	0.09077	0.4795	-1.73364	-0.465	-0.37311	0.38872	-1.82441	-0.55578	-0.46388	-2.21314	-0.9445	-0.8526	1.26864	1.36053	0.0919
chr7	80075033	80075042	-	chr7	80074804	80075630	transcript	Gm21057	0.30172	0.23797	0.1994	0.23662	1.4352	0.42312	0.53945	0.25325	0.43129	0.25913	-1.94955	-0.38581	-0.67841	0.17804	0.00587	-2.2028	-0.63906	-0.93166	-0.17217	-2.38084	-0.8171	-1.1097	-2.20868	-0.64493	-0.93754	1.56374	1.27114	-0.2926
chr14	63448102	63448111	+	chr14	63447687	63448272	5UTR	Fam167a	0.04942	0	0.01636	0.02384	0.45118	0.15619	0.16171	0.60819	0.37728	0.28287	-1.92464	-0.80171	-0.83316	-0.23092	-0.32532	-2.53283	-1.4099	-1.44135	-0.0944	-2.30191	-1.17898	-1.21044	-2.20751	-1.08458	-1.11603	1.12293	1.09148	-0.03145
chr9	44493078	44493087	-	chr9	44492967	44493241	5UTR	Bcl9l	0.27445	0.15363	0.10841	0.06384	0.63416	0.29742	0.27864	0.57281	0.86339	1.2217	-0.9823	-0.08719	-0.0163	0.29058	0.6489	-1.55511	-0.66	-0.58911	0.35832	-1.84569	-0.95058	-0.87969	-2.204	-1.30889	-1.238	0.89511	0.966	0.07089
chr10	128715760	128715769	+	chr10	128715616	128716524	CDS	Pmel	0.25344	0.27334	0.12464	0.10976	0.84554	0.38627	0.24119	-0.0803	0.6676	0.76916	-1.43454	-0.46679	0.05175	0.74789	0.84946	-1.35424	-0.3865	0.13204	0.10157	-2.10213	-1.13439	-0.61585	-2.2037	-1.23596	-0.71741	0.96774	1.48628	0.51854
chr19	10739018	10739027	-	chr19	10738797	10739237	transcript	Cd5	0.12116	0.07951	0.05132	0.06431	0.6358	0.17453	0.17857	0.30999	0.56537	0.44206	-1.76091	-0.31934	-0.34086	0.25538	0.13207	-2.0709	-0.62933	-0.65085	-0.12332	-2.32628	-0.88471	-0.90624	-2.20297	-0.7614	-0.78292	1.44157	1.42005	-0.02152
chr11	106957589	106957598	+	chr11	106957391	106957896	NA	NA	0.12941	0.15242	0.06142	0.04199	0.53276	0.15243	0.16338	-0.14128	0.52282	0.71516	-1.48718	-0.14133	-0.20399	0.66409	0.85643	-1.34591	-6e-05	-0.06272	0.19234	-2.01	-0.66415	-0.72681	-2.20234	-0.85649	-0.91915	1.34585	1.28319	-0.06266
chr9	65536250	65536259	-	chr9	65536104	65536458	NA	NA	0.21862	0.15913	0.05155	0.10869	0.83708	0.33109	0.39071	0.30426	1.10157	0.62451	-1.57373	-0.44305	-0.6323	0.79731	0.32025	-1.87799	-0.74731	-0.93656	-0.47706	-2.6753	-1.54463	-1.73388	-2.19824	-1.06756	-1.25681	1.13068	0.94143	-0.18925
chr4	134098859	134098868	-	chr4	134098657	134098956	transcript	Crybg2	0.0989	0.05977	0.03593	0.06311	0.62771	0.23322	0.13971	0.3266	0.56921	0.29565	-1.9022	-0.76164	-0.27654	0.24261	-0.03095	-2.2288	-1.08825	-0.60314	-0.27356	-2.47141	-1.33085	-0.84575	-2.19785	-1.05729	-0.57219	1.14056	1.62566	0.4851
chr7	4653984	4653993	+	chr7	4653713	4654281	5UTR	Ppp6r1	0.65448	0.55773	0.33204	0.2162	1.32929	0.91763	0.51422	0.19962	0.81261	1.27008	-0.92697	-0.43452	0.29926	0.61299	1.07047	-1.12658	-0.63414	0.09964	0.45747	-1.73958	-1.24713	-0.51335	-2.19705	-1.70461	-0.97083	0.49244	1.22622	0.73378
chr11	75415321	75415330	-	chr11	75414848	75415607	CDS	Serpinf1	0.20617	0.19088	0.11732	0.09348	0.76533	0.3618	0.33911	0.07536	0.50585	0.67832	-1.51665	-0.60221	-0.52859	0.43048	0.60296	-1.59201	-0.67757	-0.60395	0.17248	-2.0225	-1.10806	-1.03443	-2.19497	-1.28053	-1.20691	0.91444	0.98807	0.07363
chr13	40900236	40900245	-	chr13	40899720	40900335	exon	Gm31683	0.19746	0.16234	0.05422	0.07068	0.66084	0.30632	0.23879	0.18507	0.97436	0.82268	-1.37211	-0.45752	-0.19116	0.78929	0.63761	-1.55718	-0.64259	-0.37623	-0.15168	-2.34648	-1.43188	-1.16552	-2.19479	-1.2802	-1.01384	0.91459	1.18095	0.26636
chr12	102690386	102690395	-	chr12	102689846	102690521	NA	NA	1.17243	0.79884	0.46217	0.26078	1.52834	0.8875	0.56553	0.50417	1.18681	1.83504	-0.35725	0.36762	0.941	0.68263	1.33086	-0.86142	-0.13655	0.43682	0.64823	-1.54405	-0.81918	-0.24581	-2.19229	-1.46741	-0.89404	0.72487	1.29824	0.57337
chr18	64618955	64618964	-	chr18	64618319	64619136	NA	NA	0.11144	0.09043	0.09881	0.06159	0.6161	0.28673	0.17307	0.15544	0.09142	0.40041	-1.78806	-0.88924	-0.3781	-0.06402	0.24496	-1.9435	-1.04469	-0.53354	0.30898	-1.87948	-0.98067	-0.46952	-2.18846	-1.28965	-0.7785	0.89881	1.40996	0.51115
chr2	26483694	26483703	+	chr2	26483129	26483995	CDS	Notch1	0.15222	0.15028	0.06247	0.04784	0.55304	0.25354	0.21577	0.0114	0.65322	0.79461	-1.393	-0.4968	-0.33095	0.64182	0.78321	-1.4044	-0.5082	-0.34235	0.14138	-2.04622	-1.15003	-0.98417	-2.18761	-1.29141	-1.12556	0.8962	1.06205	0.16586
chr2	155979550	155979559	-	chr2	155978987	155979821	CDS	Cep250	0.18951	0.18357	0.12675	0.12205	0.89108	0.25287	0.26997	0.03052	0.36062	0.39164	-1.79594	-0.29076	-0.36014	0.3301	0.36112	-1.82646	-0.32128	-0.39066	0.03101	-2.15656	-0.65139	-0.72076	-2.18757	-0.6824	-0.75178	1.50517	1.4358	-0.06938
chr7	31033949	31033958	-	chr7	31033737	31034116	exon	Fxyd5	0.1394	0.11594	0.07059	0.03807	0.50844	0.24086	0.16278	0.15266	0.50328	0.82032	-1.36707	-0.52029	-0.13759	0.35063	0.66766	-1.51972	-0.67294	-0.29024	0.31704	-1.87035	-1.02357	-0.64087	-2.18738	-1.3406	-0.95791	0.84678	1.22948	0.3827
chr9	65536375	65536384	+	chr9	65536104	65536458	NA	NA	0.12755	0.07797	0.08981	0.06507	0.62946	0.2033	0.20529	0.36501	0.26908	0.47733	-1.70615	-0.42387	-0.43349	-0.09592	0.11233	-2.07116	-0.78888	-0.7985	0.20825	-1.97524	-0.69296	-0.70257	-2.18348	-0.9012	-0.91082	1.28228	1.27266	-0.00962
chr8	83748825	83748834	-	chr8	83748468	83749179	transcript	Gm46046	0.35205	0.25259	0.16306	0.1442	0.98869	0.87869	0.67572	0.36374	0.79451	0.90433	-1.27887	-1.12434	-0.78679	0.43076	0.54058	-1.64261	-1.48808	-1.15053	0.10982	-2.07337	-1.91884	-1.58129	-2.18319	-2.02866	-1.69112	0.15453	0.49208	0.33755
chr17	45517773	45517782	+	chr17	45517553	45518078	CDS	Aars2	0.48888	0.3415	0.12279	0.11286	0.84491	0.52475	0.54209	0.42032	1.42586	1.49342	-0.68755	-0.08612	-0.12598	1.00554	1.0731	-1.10787	-0.50644	-0.5463	0.06756	-2.11341	-1.51198	-1.55184	-2.18097	-1.57954	-1.6194	0.60143	0.56157	-0.03986
chr6	114458470	114458479	+	chr6	114458230	114458602	5UTR	Hrh1	0.07817	0.04149	0.02249	0.01482	0.40029	0.11508	0.12069	0.34508	0.56263	0.66067	-1.52016	-0.27985	-0.31801	0.21755	0.31559	-1.86524	-0.62493	-0.66309	0.09804	-2.08279	-0.84248	-0.88064	-2.18083	-0.94052	-0.97868	1.24031	1.20215	-0.03815
chr1	51930743	51930752	+	chr1	51930634	51930949	exon	Gm8419	0.15766	0.13334	0.03142	0.07448	0.66752	0.21855	0.22291	0.14647	1.00327	0.57819	-1.59645	-0.31233	-0.3323	0.8568	0.43172	-1.74292	-0.4588	-0.47877	-0.42508	-2.59972	-1.3156	-1.33557	-2.17464	-0.89052	-0.91049	1.28411	1.26414	-0.01997
chr1	106162845	106162854	-	chr1	106162557	106163038	exon	Gm20753	0.06508	0.07003	0.06153	0.02564	0.44685	0.35093	0.09155	-0.04414	0.03251	0.41031	-1.76388	-1.48237	-0.22173	0.07665	0.45445	-1.71974	-1.43823	-0.17759	0.3778	-1.79639	-1.51488	-0.25424	-2.17418	-1.89268	-0.63204	0.28151	1.54214	1.26064
chr13	41487085	41487094	+	chr13	41486665	41487507	5UTR	Nedd9	0.2826	0.20544	0.12743	0.08405	0.70977	0.30034	0.27575	0.33052	0.76551	1.07968	-1.09324	-0.06636	0.02647	0.43499	0.74916	-1.42376	-0.39688	-0.30405	0.31417	-1.85875	-0.83188	-0.73905	-2.17292	-1.14605	-1.05322	1.02688	1.11971	0.09283
chr10	75105818	75105827	-	chr10	75105702	75106069	NA	NA	0.10635	0.04049	0.03975	0.02106	0.42571	0.22015	0.20406	0.57414	0.58209	0.7988	-1.37408	-0.64828	-0.57249	0.00795	0.22466	-1.94822	-1.22242	-1.14663	0.21672	-1.95617	-1.23037	-1.15458	-2.17288	-1.44708	-1.37129	0.7258	0.80159	0.07579
chr2	173377667	173377676	-	chr2	173377452	173378037	exon	Gm29859	0.27306	0.32002	0.10443	0.10532	0.80461	0.58394	0.42838	-0.17357	0.88655	0.8801	-1.2911	-0.88469	-0.50879	1.06012	1.05368	-1.11753	-0.71112	-0.33522	-0.00645	-2.17765	-1.77124	-1.39534	-2.1712	-1.76479	-1.3889	0.40641	0.78231	0.3759
chr4	141977585	141977594	-	chr4	141977371	141977689	transcript	Fhad1	0.19495	0.10093	0.06369	0.07707	0.67667	0.28373	0.20358	0.56726	0.87269	0.75537	-1.41451	-0.38624	-0.04242	0.30543	0.18811	-1.98178	-0.9535	-0.60968	-0.11732	-2.2872	-1.25893	-0.91511	-2.16989	-1.14162	-0.7978	1.02827	1.37209	0.34382
chr4	150566366	150566375	-	chr4	150566139	150566512	NA	NA	0.2329	0.21202	0.09954	0.11354	0.84029	0.25835	0.33232	0.09515	0.75546	0.65483	-1.5143	-0.10808	-0.38283	0.66031	0.55968	-1.60945	-0.20323	-0.47798	-0.10063	-2.26976	-0.86354	-1.13829	-2.16913	-0.76291	-1.03766	1.40622	1.13147	-0.27475
chr7	122310408	122310417	+	chr7	122310052	122310825	NA	NA	0.10818	0.04555	0.01173	0.02802	0.45523	0.14395	0.14457	0.53406	0.93363	0.72735	-1.44064	-0.23475	-0.2385	0.39957	0.19329	-1.9747	-0.76881	-0.77256	-0.20628	-2.37427	-1.16838	-1.17213	-2.168	-0.9621	-0.96585	1.20589	1.20214	-0.00375
chr1	87626566	87626575	+	chr1	87626369	87626715	exon	Inpp5d	0.6029	0.63901	0.47645	0.35512	1.92506	0.64966	1.06304	-0.07286	0.28874	0.63357	-1.53432	-0.09366	-0.73121	0.36159	0.70642	-1.46147	-0.0208	-0.65835	0.34483	-1.82306	-0.3824	-1.01995	-2.16789	-0.72722	-1.36477	1.44066	0.80311	-0.63755
chr5	35729126	35729135	-	chr5	35728724	35729487	5UTR	Sh3tc1	0.15803	0.10405	0.07651	0.07724	0.67621	0.26168	0.22148	0.34734	0.56306	0.5569	-1.61069	-0.49657	-0.32367	0.21571	0.20956	-1.95804	-0.84391	-0.67101	-0.00615	-2.17375	-1.05962	-0.88672	-2.1676	-1.05347	-0.88057	1.11413	1.28703	0.1729
chr5	120165211	120165220	-	chr5	120164832	120165532	transcript	Rbm19	0.06556	0.04462	0.04875	0.06002	0.59873	0.14014	0.18301	0.20262	0.16034	0.0509	-2.11646	-0.55255	-0.79488	-0.04228	-0.15172	-2.31908	-0.75518	-0.9975	-0.10944	-2.2768	-0.7129	-0.95522	-2.16736	-0.60345	-0.84578	1.5639	1.32157	-0.24233
chr4	155200934	155200943	+	chr4	155200658	155201436	NA	NA	0.23307	0.23594	0.14268	0.09991	0.77754	0.4544	0.53241	-0.01259	0.46624	0.75346	-1.41328	-0.74518	-0.93698	0.47884	0.76605	-1.40068	-0.73259	-0.92439	0.28721	-1.87952	-1.21143	-1.40322	-2.16673	-1.49864	-1.69044	0.66809	0.4763	-0.1918
chr9	111046370	111046379	+	chr9	111046316	111046611	transcript	Ltf	0.07779	0.06364	0.05746	0.03321	0.47711	0.22775	0.14954	0.12382	0.18143	0.4327	-1.73166	-0.90432	-0.50289	0.0576	0.30888	-1.85548	-1.02814	-0.62672	0.25127	-1.91308	-1.08574	-0.68432	-2.16436	-1.33702	-0.93559	0.82734	1.22876	0.40142
chr6	90825237	90825246	+	chr6	90825099	90825482	NA	NA	0.21855	0.09821	0.05209	0.10461	0.79605	0.36292	0.21796	0.70068	1.09592	0.65349	-1.50905	-0.54749	0.00272	0.39523	-0.04719	-2.20973	-1.24817	-0.69796	-0.44243	-2.60497	-1.64341	-1.09319	-2.16254	-1.20098	-0.65076	0.96156	1.51177	0.55021
chr14	45079998	45080007	+	chr14	45079870	45080210	NA	NA	0.0855	0.0972	0.00734	0.01781	0.40736	0.12482	0.09189	-0.09098	0.82323	0.68172	-1.48057	-0.2854	-0.0504	0.91421	0.7727	-1.3896	-0.19442	0.04058	-0.14151	-2.30381	-1.10863	-0.87363	-2.16229	-0.96712	-0.73212	1.19517	1.43018	0.235
chr1	60852558	60852567	+	chr1	60852369	60852819	NA	NA	0.05567	0.03906	0.0698	0.03818	0.49844	0.10591	0.14627	0.16941	-0.12994	0.17896	-1.98308	-0.41696	-0.68196	-0.29935	0.00956	-2.15249	-0.58637	-0.85137	0.30891	-1.85314	-0.28702	-0.55202	-2.16205	-0.59592	-0.86093	1.56612	1.30112	-0.265
chr15	77800636	77800645	-	chr15	77800527	77801129	transcript	Myh9	0.30069	0.26811	0.22046	0.10188	0.78293	0.35943	0.48788	0.12421	0.32761	1.00982	-1.15124	-0.20004	-0.55971	0.2034	0.88561	-1.27545	-0.32425	-0.68392	0.68221	-1.47885	-0.52765	-0.88732	-2.16106	-1.20986	-1.56953	0.9512	0.59153	-0.35967
chr2	157063587	157063596	+	chr2	157063118	157063796	NA	NA	0.19329	0.17999	0.07493	0.10605	0.80117	0.30234	0.30078	0.06832	0.7652	0.5216	-1.6388	-0.46389	-0.4582	0.69688	0.45328	-1.70713	-0.53221	-0.52652	-0.2436	-2.40401	-1.22909	-1.2234	-2.1604	-0.98549	-0.9798	1.17492	1.1806	0.00569
chr17	35200646	35200655	-	chr17	35200340	35200833	exon	Tnf	0.46142	0.38753	0.30417	0.1972	1.20862	0.49008	0.37844	0.20585	0.47994	0.93098	-1.22939	-0.07256	0.23333	0.27408	0.72513	-1.43525	-0.27841	0.02748	0.45104	-1.70933	-0.55249	-0.2466	-2.16037	-1.00353	-0.69765	1.15684	1.46273	0.30589
chr10	3740363	3740372	+	chr10	3740154	3740574	5UTR	Plekhg1	0.59987	0.31266	0.15193	0.23518	1.37809	0.98119	0.52617	0.77048	1.49547	1.07521	-1.08485	-0.63167	0.16194	0.725	0.30474	-1.85533	-1.40215	-0.60854	-0.42026	-2.58033	-2.12714	-1.33353	-2.16007	-1.70688	-0.91327	0.45318	1.24679	0.79361
chr11	71251644	71251653	-	chr11	71251327	71251798	exon	Nlrp1c-ps	0.09692	0.06637	0.01931	0.07006	0.63927	0.17888	0.16524	0.2512	0.7514	0.21844	-1.93998	-0.51473	-0.44082	0.5002	-0.03277	-2.19118	-0.76594	-0.69203	-0.53297	-2.69138	-1.26613	-1.19222	-2.15842	-0.73317	-0.65926	1.42525	1.49916	0.07391
chr11	71251660	71251669	-	chr11	71251327	71251798	exon	Nlrp1c-ps	0.08953	0.04324	0.01898	0.07006	0.63927	0.17888	0.16412	0.41865	0.69872	0.16156	-1.99686	-0.57161	-0.49146	0.28007	-0.25709	-2.41551	-0.99026	-0.91011	-0.53716	-2.69558	-1.27033	-1.19018	-2.15842	-0.73317	-0.65302	1.42525	1.5054	0.08015
chr10	81298131	81298140	+	chr10	81297932	81298248	exon	Gm16315	0.44026	0.41087	0.17613	0.18042	1.13153	0.86538	0.5048	0.08159	0.98323	0.96052	-1.19741	-0.84426	-0.16446	0.90164	0.87893	-1.279	-0.92585	-0.24605	-0.02271	-2.18064	-1.82749	-1.14769	-2.15793	-1.80478	-1.12498	0.35315	1.03295	0.6798
chr14	70066179	70066188	+	chr14	70065634	70066404	transcript	Pebp4	0.12548	0.08667	0.0621	0.07298	0.65154	0.2	0.12107	0.28038	0.49095	0.3939	-1.76304	-0.42131	0.02925	0.21057	0.11352	-2.04342	-0.70169	-0.25113	-0.09705	-2.25399	-0.91226	-0.4617	-2.15694	-0.81521	-0.36465	1.34173	1.79229	0.45056
chr15	73162042	73162051	+	chr15	73161938	73162766	NA	NA	0.20664	0.09883	0.10791	0.12071	0.86328	0.38083	0.44211	0.64004	0.57374	0.48517	-1.67008	-0.65893	-0.83397	-0.0663	-0.15487	-2.31012	-1.29897	-1.474	-0.08857	-2.24382	-1.23267	-1.4077	-2.15525	-1.1441	-1.31913	1.01115	0.83612	-0.17503
chr1	74249047	74249056	+	chr1	74248779	74249189	CDS	Arpc2	0.25224	0.14181	0.09044	0.09765	0.75941	0.30752	0.26209	0.55366	0.90771	0.85246	-1.30085	-0.21356	-0.04044	0.35405	0.2988	-1.85451	-0.76722	-0.5941	-0.05525	-2.20856	-1.12126	-0.94815	-2.15331	-1.06602	-0.8929	1.08729	1.26041	0.17312
chr13	45109218	45109227	-	chr13	45108873	45109429	exon	Gm40932	0.2346	0.13461	0.08659	0.05497	0.5692	0.28442	0.29232	0.52296	0.86272	1.13999	-1.01256	-0.20351	-0.2333	0.33975	0.61702	-1.53552	-0.72648	-0.75626	0.27727	-1.87527	-1.06623	-1.09602	-2.15255	-1.3435	-1.37329	0.80905	0.77926	-0.02979
chr8	117526322	117526331	-	chr8	117525805	117526567	NA	NA	0.12526	0.09205	0.07339	0.05378	0.56325	0.19587	0.20198	0.23666	0.38892	0.5684	-1.5827	-0.40236	-0.43243	0.15226	0.33174	-1.81936	-0.63902	-0.66909	0.17948	-1.97162	-0.79128	-0.82135	-2.1511	-0.97076	-1.00083	1.18034	1.15027	-0.03007
chr12	84130136	84130145	-	chr12	84129956	84130347	transcript	Dnal1	0.10196	0.10785	0.02227	0.05536	0.5698	0.14201	0.2658	-0.04267	0.75182	0.39119	-1.75889	-0.26798	-0.8758	0.79449	0.43386	-1.71622	-0.22531	-0.83313	-0.36063	-2.51071	-1.0198	-1.62762	-2.15009	-0.65917	-1.26699	1.49092	0.88309	-0.60782
chr15	78244976	78244985	+	chr15	78244625	78245376	exon	Ncf4	0.06457	0.09184	0.04374	0.09464	0.7427	0.26691	0.16981	-0.22861	0.20283	-0.25015	-2.39775	-1.18525	-0.73347	0.43144	-0.02155	-2.16914	-0.95664	-0.50487	-0.45298	-2.60058	-1.38807	-0.9363	-2.1476	-0.93509	-0.48332	1.2125	1.66428	0.45177
chr12	104062063	104062072	+	chr12	104061852	104062259	NA	NA	0.07051	0.06458	0.05491	0	0.32292	0.18871	0.23618	0.05288	0.14351	0.8058	-1.34027	-0.78023	-1.00398	0.09062	0.75292	-1.39315	-0.83311	-1.05686	0.6623	-1.48377	-0.92374	-1.14748	-2.14607	-1.58603	-1.80978	0.56004	0.33629	-0.22375
chr10	41386090	41386099	+	chr10	41385506	41386336	CDS	Ak9	0.51635	0.2425	0.21124	0.16808	1.06654	0.48081	0.35768	0.85855	0.9991	1.21884	-0.92681	0.08652	0.43413	0.14055	0.3603	-1.78536	-0.77203	-0.42442	0.21974	-1.92591	-0.91259	-0.56497	-2.14565	-1.13233	-0.78472	1.01332	1.36094	0.34761
chr4	47303517	47303526	-	chr4	47303221	47303976	CDS	Col15a1	0.09194	0.1016	0.11528	0.02091	0.41532	0.20507	0.193	-0.07297	-0.17038	0.69314	-1.4525	-0.68491	-0.62553	-0.09741	0.76611	-1.37953	-0.61194	-0.55256	0.86352	-1.28212	-0.51453	-0.45515	-2.14564	-1.37805	-1.31867	0.76759	0.82697	0.05938
chr4	133169728	133169737	+	chr4	133169233	133170056	transcript	Wasf2	0.6257	0.33588	0.21702	0.13988	0.93893	0.54852	0.63818	0.74312	1.20973	1.62059	-0.52112	0.16359	-0.02479	0.46661	0.87746	-1.26425	-0.57953	-0.76792	0.41086	-1.73085	-1.04614	-1.23452	-2.14171	-1.45699	-1.64538	0.68472	0.49633	-0.18839
chr4	137883970	137883979	-	chr4	137883515	137884068	exon	Gm13012	0.13204	0.06314	0.02007	0	0.32071	0.2471	0.18122	0.52383	0.9851	1.26361	-0.8748	-0.59308	-0.28372	0.46127	0.73978	-1.39863	-1.11691	-0.80755	0.27851	-1.85989	-1.57817	-1.26882	-2.13841	-1.85669	-1.54733	0.28172	0.59108	0.30936
chr2	180692832	180692841	-	chr2	180692488	180693079	5UTR	Dido1	0.46091	0.34829	0.15963	0.11923	0.8447	0.81841	0.50847	0.3271	1.12876	1.3788	-0.75814	-0.71717	-0.11858	0.80166	1.05171	-1.08524	-1.04427	-0.44568	0.25005	-1.8869	-1.84593	-1.24734	-2.13695	-2.09598	-1.49739	0.04097	0.63956	0.59859
chr6	31221788	31221797	-	chr6	31221527	31221888	exon	2210408F21Rik	0.36188	0.32217	0.21705	0.07927	0.66863	0.29892	0.30279	0.13141	0.55114	1.39434	-0.74201	0.21429	0.20016	0.41973	1.26294	-0.87342	0.08289	0.06876	0.8432	-1.29315	-0.33685	-0.35098	-2.13635	-1.18005	-1.19418	0.9563	0.94217	-0.01413
chr6	112862140	112862149	+	chr6	112861408	112862356	NA	NA	0.0888	0.07969	0.02821	0.05447	0.55942	0.14935	0.11043	0.07365	0.57993	0.29964	-1.83632	-0.41228	-0.16113	0.50628	0.22599	-1.90997	-0.48592	-0.23478	-0.28029	-2.41625	-0.9922	-0.74106	-2.13596	-0.71192	-0.46077	1.42405	1.67519	0.25114
chr1	134196542	134196551	-	chr1	134196195	134196763	CDS	Mybph	0.47114	0.23369	0.21846	0.18334	1.12502	0.44033	0.5066	0.78581	0.85442	1.02629	-1.1087	0.08084	-0.08776	0.06861	0.24048	-1.89451	-0.70497	-0.87357	0.17187	-1.96312	-0.77358	-0.94218	-2.13499	-0.94545	-1.11405	1.18954	1.02094	-0.1686
chr15	73442559	73442568	-	chr15	73442409	73442910	NA	NA	0.17972	0.17287	0.12785	0.09531	0.73765	0.1919	0.34363	0.03653	0.30281	0.53136	-1.60239	-0.06275	-0.67652	0.26628	0.49483	-1.63892	-0.09928	-0.71305	0.22855	-1.9052	-0.36556	-0.97933	-2.13376	-0.59412	-1.20788	1.53964	0.92587	-0.61376
chr12	69448145	69448154	-	chr12	69447858	69448322	NA	NA	0.46283	0.45354	0.31072	0.17302	1.07804	0.49766	0.43957	0.02426	0.46007	1.05959	-1.07337	-0.08749	0.06153	0.43581	1.03533	-1.09763	-0.11175	0.03727	0.59952	-1.53344	-0.54756	-0.39854	-2.13296	-1.14708	-0.99806	0.98588	1.1349	0.14902
chr9	107624749	107624758	+	chr9	107624622	107624896	transcript	Gnai2	0.49455	0.40641	0.25708	0.13562	0.91376	0.57844	0.49259	0.23395	0.74495	1.35696	-0.77566	-0.19216	0.00481	0.511	1.12301	-1.00961	-0.42611	-0.22914	0.61201	-1.52061	-0.93712	-0.74014	-2.13262	-1.54912	-1.35215	0.5835	0.78047	0.19697
chr14	30458022	30458031	+	chr14	30457835	30458199	exon	4831407H17Rik	0.1036	0.06514	0.08014	0.05971	0.58086	0.1981	0.15469	0.31185	0.18209	0.36185	-1.77072	-0.56329	-0.33139	-0.12976	0.05001	-2.08256	-0.87514	-0.64324	0.17976	-1.95281	-0.74538	-0.51348	-2.13257	-0.92514	-0.69324	1.20743	1.43932	0.2319
chr6	52842766	52842775	-	chr6	52842653	52842966	NA	NA	0.09437	0.05217	0.03405	0.04432	0.51287	0.13922	0.15123	0.36537	0.55596	0.44487	-1.6865	-0.30775	-0.38012	0.19059	0.0795	-2.05187	-0.67312	-0.74549	-0.11109	-2.24246	-0.86372	-0.93608	-2.13137	-0.75262	-0.82499	1.37874	1.30638	-0.07237
chr7	24954600	24954609	+	chr7	24954370	24954767	transcript	Gm36809	0.35268	0.27124	0.08292	0.07679	0.65512	0.37888	0.29267	0.29022	1.33491	1.38572	-0.74563	-0.08219	0.20801	1.0447	1.0955	-1.03585	-0.3724	-0.0822	0.0508	-2.08054	-1.4171	-1.1269	-2.13134	-1.4679	-1.1777	0.66344	0.95364	0.2902
chr15	12034478	12034487	-	chr15	12034265	12034672	NA	NA	0.17445	0.14192	0.1284	0.04974	0.53639	0.32124	0.19803	0.18617	0.27122	0.90003	-1.23082	-0.62882	-0.12135	0.08505	0.71386	-1.41699	-0.81499	-0.30753	0.62881	-1.50204	-0.90004	-0.39257	-2.13085	-1.52885	-1.02138	0.602	1.10947	0.50746
chr4	46554905	46554914	+	chr4	46554597	46555272	CDS	Coro2a	0.28318	0.13734	0.14003	0.08911	0.70786	0.40458	0.18394	0.70464	0.68798	1.04153	-1.08759	-0.40234	0.44014	-0.01666	0.33689	-1.79223	-1.10698	-0.2645	0.35355	-1.77557	-1.09031	-0.24784	-2.12912	-1.44387	-0.60139	0.68525	1.52773	0.84248
chr2	27311848	27311857	-	chr2	27311638	27312006	CDS	Vav2	0.09401	0.0758	0.02766	0.05299	0.54974	0.1008	0.17857	0.14677	0.62691	0.35456	-1.77431	-0.05112	-0.53522	0.48014	0.20779	-1.92108	-0.19788	-0.68199	-0.27235	-2.40122	-0.67803	-1.16213	-2.12887	-0.40567	-0.88978	1.72319	1.23909	-0.48411
chr6	86607691	86607700	+	chr6	86607523	86607971	exon	Gm46963	0.18037	0.19901	0.07204	0.0932	0.72545	0.26743	0.24706	-0.09474	0.72374	0.55093	-1.57766	-0.39728	-0.31365	0.81848	0.64567	-1.48292	-0.30253	-0.2189	-0.1728	-2.30139	-1.12101	-1.03738	-2.12859	-0.94821	-0.86458	1.18038	1.26401	0.08363
chr11	67589012	67589021	-	chr11	67588377	67589300	exon	Gas7	0.14588	0.13951	0.05785	0.03758	0.48195	0.33228	0.32892	0.03879	0.6588	0.86514	-1.26275	-0.82883	-0.81742	0.62001	0.82635	-1.30154	-0.86762	-0.85621	0.20634	-1.92155	-1.48763	-1.47622	-2.12789	-1.69397	-1.68256	0.43392	0.44533	0.01141
chr10	42897784	42897793	+	chr10	42897593	42898188	transcript	Scml4	0.15003	0.09322	0.0364	0.06124	0.5842	0.16196	0.19752	0.38188	0.90283	0.65171	-1.47371	-0.06879	-0.2563	0.52095	0.26984	-1.85558	-0.45067	-0.63817	-0.25111	-2.37654	-0.97162	-1.15912	-2.12542	-0.7205	-0.90801	1.40492	1.21741	-0.1875
chr15	101262616	101262625	+	chr15	101262514	101262916	5UTR	Nr4a1	0.17591	0.15629	0.06331	0.05297	0.54713	0.17715	0.17953	0.10877	0.77791	0.87584	-1.24737	-0.00661	-0.0192	0.66914	0.76707	-1.35614	-0.11538	-0.12798	0.09793	-2.02528	-0.78452	-0.79712	-2.12321	-0.88245	-0.89504	1.24076	1.22816	-0.0126
chr10	118419144	118419153	+	chr10	118418845	118419515	NA	NA	0.33092	0.20352	0.13499	0.09745	0.74091	0.44821	0.20192	0.51384	0.89118	1.14919	-0.97401	-0.35148	0.52161	0.37734	0.63535	-1.48785	-0.86532	0.00777	0.25801	-1.86519	-1.24266	-0.36957	-2.1232	-1.50067	-0.62758	0.62254	1.49563	0.87309
chr13	92030889	92030898	-	chr13	92030711	92031088	CDS	Rasgrf2	0.04383	0.07851	0.03934	0.02429	0.42189	0.14417	0.162	-0.32326	0.04769	0.22013	-1.90226	-0.788	-0.89205	0.37096	0.5434	-1.57899	-0.46474	-0.56878	0.17244	-1.94995	-0.83569	-0.93974	-2.12239	-1.00813	-1.11218	1.11426	1.01021	-0.10405
chr16	22798729	22798738	-	chr16	22798594	22798906	exon	Gm30416	0.13439	0.09669	0.06601	0.03769	0.48019	0.16139	0.11728	0.25996	0.51266	0.7932	-1.32908	-0.16104	0.11222	0.2527	0.53324	-1.58904	-0.42099	-0.14774	0.28053	-1.84174	-0.6737	-0.40045	-2.12227	-0.95423	-0.68098	1.16804	1.44129	0.27325
chr17	5808008	5808017	-	chr17	5807904	5808160	transcript	3300005D01Rik	0.12463	0.10554	0.05242	0.04467	0.51057	0.16176	0.24207	0.13166	0.57757	0.65589	-1.46637	-0.22606	-0.61969	0.44591	0.52423	-1.59802	-0.35772	-0.75135	0.07832	-2.04393	-0.80363	-1.19726	-2.12225	-0.88195	-1.27558	1.24031	0.84667	-0.39363
chr16	78490389	78490398	+	chr16	78490132	78490743	NA	NA	0.45974	0.28062	0.21698	0.12551	0.86241	0.4802	0.39492	0.56347	0.83188	1.33393	-0.78815	-0.05232	0.17952	0.26841	0.77046	-1.35162	-0.61579	-0.38395	0.50205	-1.62003	-0.8842	-0.65235	-2.12208	-1.38625	-1.15441	0.73582	0.96767	0.23185
chr5	98018334	98018343	+	chr5	98018120	98018570	exon	Gm34226	0.10584	0.08374	0.04457	0.04205	0.49898	0.15365	0.20308	0.16885	0.52743	0.55386	-1.56794	-0.30911	-0.57142	0.35858	0.38501	-1.7368	-0.47796	-0.74027	0.02643	-2.09538	-0.83654	-1.09885	-2.12181	-0.86297	-1.12528	1.25883	0.99653	-0.26231
chr8	72169485	72169494	-	chr8	72168951	72169693	CDS	Rab8a	0.08405	0.09251	0.05797	0.04579	0.51483	0.21994	0.26793	-0.06688	0.22815	0.34847	-1.77233	-0.81733	-1.0224	0.29503	0.41535	-1.70545	-0.75045	-0.95552	0.12032	-2.00047	-1.04548	-1.25055	-2.12079	-1.1658	-1.37087	0.95499	0.74992	-0.20507
chr1	180601968	180601977	+	chr1	180601681	180602243	transcript	Parp1	0.06802	0.13911	0.05492	0.02991	0.44482	0.16623	0.13099	-0.52416	0.12144	0.3862	-1.73208	-0.68278	-0.47307	0.6456	0.91036	-1.20792	-0.15862	0.05109	0.26476	-1.85352	-0.80422	-0.59451	-2.11827	-1.06897	-0.85926	1.0493	1.25901	0.20971
chr8	117055340	117055349	-	chr8	117055133	117055511	CDS	Pkd1l2	0.12836	0.09341	0.07615	0.05864	0.56953	0.19237	0.18689	0.2464	0.38559	0.54202	-1.57619	-0.36462	-0.33677	0.1392	0.29563	-1.82258	-0.61102	-0.58317	0.15643	-1.96178	-0.75021	-0.72236	-2.11821	-0.90665	-0.87879	1.21157	1.23942	0.02785
chr1	191421240	191421249	+	chr1	191420966	191421372	exon	Gm32128	0.16731	0.10789	0.06984	0.05743	0.56384	0.25234	0.15647	0.37179	0.67265	0.78611	-1.33114	-0.40609	0.06106	0.30087	0.41432	-1.70293	-0.77788	-0.31072	0.11346	-2.0038	-1.07874	-0.61159	-2.11725	-1.1922	-0.72505	0.92505	1.39221	0.46715
chr8	117482034	117482043	-	chr8	117481853	117482177	NA	NA	0.25215	0.10604	0.10585	0.07517	0.63992	0.20443	0.17969	0.79035	0.79172	1.03183	-1.08368	0.21384	0.33858	0.00137	0.24149	-1.87402	-0.57651	-0.45177	0.24012	-1.87539	-0.57788	-0.45314	-2.11551	-0.818	-0.69326	1.29751	1.42225	0.12474
chr1	173420490	173420499	+	chr1	173420334	173420754	5UTR	Aim2	0.50321	0.34371	0.13196	0.19953	1.17875	0.49648	0.49328	0.44804	1.40118	1.02411	-1.09132	0.01634	0.02418	0.95314	0.57606	-1.53936	-0.4317	-0.42386	-0.37707	-2.4925	-1.38484	-1.377	-2.11542	-1.00776	-0.99993	1.10766	1.1155	0.00784
chr4	130913250	130913259	+	chr4	130913095	130913390	5UTR	Laptm5	0.44294	0.34696	0.18412	0.13731	0.90874	0.63092	0.5698	0.28397	0.94843	1.21405	-0.9008	-0.43289	-0.30586	0.66446	0.93008	-1.18477	-0.71685	-0.58983	0.26562	-1.84923	-1.38132	-1.25429	-2.11485	-1.64693	-1.51991	0.46792	0.59494	0.12703
chr16	32401747	32401756	+	chr16	32401404	32402016	5UTR	Tm4sf19	0.1307	0.06682	0.0654	0.03034	0.44482	0.23866	0.18417	0.48192	0.49469	0.85242	-1.26087	-0.56553	-0.30766	0.01278	0.3705	-1.74278	-1.04744	-0.78958	0.35772	-1.75556	-1.06022	-0.80235	-2.11328	-1.41794	-1.16007	0.69534	0.95321	0.25787
chr17	31437225	31437234	-	chr17	31436825	31437393	5UTR	Pde9a	0.19671	0.09663	0.07972	0.09691	0.73239	0.23439	0.17548	0.60815	0.74198	0.60604	-1.50644	-0.17569	0.1093	0.13383	-0.00211	-2.11459	-0.78384	-0.49885	-0.13594	-2.24842	-0.91767	-0.63268	-2.11248	-0.78173	-0.49674	1.33075	1.61574	0.28499
chr8	88666650	88666659	+	chr8	88666454	88666748	transcript	Nod2	0.16505	0.18274	0.09225	0.05651	0.55738	0.1932	0.24041	-0.09521	0.47545	0.78237	-1.32943	-0.14869	-0.36807	0.57066	0.87758	-1.23422	-0.05348	-0.27286	0.30692	-1.80488	-0.62414	-0.84352	-2.1118	-0.93106	-1.15044	1.18074	0.96136	-0.21939
chr4	155235106	155235115	-	chr4	155234964	155235880	transcript	Gm52713	0.28828	0.21503	0.1306	0.07192	0.62361	0.34134	0.23182	0.30666	0.76661	1.20291	-0.90813	-0.1874	0.23039	0.45995	0.89625	-1.21479	-0.49406	-0.07627	0.4363	-1.67474	-0.95401	-0.53622	-2.11104	-1.39031	-0.97252	0.72073	1.13852	0.41779
chr7	81849481	81849490	-	chr7	81849219	81849968	exon	Gm51491	0.0563	0.01967	0.02873	0.02165	0.40628	0.15818	0.14745	0.40222	0.29182	0.37736	-1.73321	-0.74564	-0.68297	-0.1104	-0.02486	-2.13544	-1.14786	-1.0852	0.08554	-2.02503	-1.03746	-0.97479	-2.11058	-1.123	-1.06034	0.98757	1.05024	0.06267
chr10	79940914	79940923	-	chr10	79940777	79941100	transcript	Arid3a	0.14385	0.10126	0.08325	0.05979	0.56996	0.17961	0.20562	0.28433	0.42375	0.62826	-1.48007	-0.20187	-0.33277	0.13942	0.34394	-1.7644	-0.4862	-0.61709	0.20451	-1.90382	-0.62562	-0.75652	-2.10833	-0.83013	-0.96103	1.2782	1.1473	-0.1309
chr16	94241381	94241390	-	chr16	94241099	94241514	exon	Gm6363	0.1759	0.134	0.11771	0.03225	0.45088	0.25703	0.16034	0.24315	0.34997	1.09462	-1.01284	-0.37886	0.08558	0.10682	0.85148	-1.25599	-0.62201	-0.15756	0.74465	-1.36281	-0.72883	-0.26438	-2.10746	-1.47348	-1.00904	0.63398	1.09842	0.46445
chr11	69931158	69931167	+	chr11	69931023	69931383	NA	NA	0.22277	0.26017	0.09508	0.09429	0.7167	0.60956	0.38926	-0.16089	0.74367	0.7497	-1.35504	-1.15061	-0.60897	0.90456	0.91059	-1.19415	-0.98973	-0.44809	0.00603	-2.09871	-1.89428	-1.35264	-2.10474	-1.90032	-1.35868	0.20443	0.74607	0.54164
chr2	65342325	65342334	-	chr2	65342096	65342488	CDS	Slc38a11	0.23346	0.15583	0.09316	0.11053	0.78608	0.29996	0.21752	0.39003	0.80622	0.67834	-1.42562	-0.26654	0.07194	0.41619	0.28831	-1.81565	-0.65657	-0.31809	-0.12788	-2.23185	-1.07277	-0.73428	-2.10397	-0.94489	-0.60641	1.15908	1.49756	0.33848
chr12	55389881	55389890	+	chr12	55389734	55390103	exon	Psma6	0.20486	0.15328	0.06271	0.05777	0.55886	0.17703	0.2341	0.27307	0.93028	0.97642	-1.12665	0.14089	-0.13456	0.65721	0.70334	-1.39972	-0.13218	-0.40763	0.04614	-2.05693	-0.78939	-1.06484	-2.10306	-0.83552	-1.11097	1.26754	0.99209	-0.27545
chr1	152807789	152807798	-	chr1	152807517	152808439	start_codon	Ncf2	0.29783	0.25094	0.15296	0.15321	0.96883	0.44723	0.34143	0.18376	0.66541	0.66395	-1.43903	-0.46576	-0.15212	0.48165	0.4802	-1.62279	-0.64952	-0.33588	-0.00146	-2.10444	-1.13117	-0.81753	-2.10298	-1.12971	-0.81607	0.97327	1.28691	0.31364
chr10	60932041	60932050	-	chr10	60931806	60932443	exon	Gm26947	0.03708	0.05695	0.01374	0.03127	0.44458	0.17308	0.14628	-0.20326	0.2823	0.06528	-2.03663	-1.02543	-0.87302	0.48556	0.26854	-1.83337	-0.82216	-0.66976	-0.21702	-2.31893	-1.30772	-1.15532	-2.10191	-1.0907	-0.9383	1.01121	1.16361	0.1524
chr8	113656261	113656270	+	chr8	113656063	113656477	transcript	Syce1l	0.06645	0.07461	0.03945	0.05413	0.54262	0.17349	0.13446	-0.07146	0.26537	0.11507	-1.98663	-0.73646	-0.50915	0.33683	0.18653	-1.91517	-0.66501	-0.43769	-0.1503	-2.252	-1.00183	-0.77452	-2.1017	-0.85154	-0.62422	1.25017	1.47748	0.22731
chr6	146759211	146759220	+	chr6	146759045	146759426	5UTR	Stk38l	0.08897	0.07307	0.10553	0.04952	0.52152	0.18797	0.19068	0.13097	-0.12484	0.34981	-1.74881	-0.62324	-0.63703	-0.2558	0.21885	-1.87978	-0.75421	-0.768	0.47465	-1.62398	-0.49841	-0.5122	-2.09863	-0.97306	-0.98684	1.12557	1.11178	-0.01379
chr13	117211554	117211563	-	chr13	117211211	117211847	NA	NA	0.11746	0.0903	0.05631	0.0757	0.63314	0.19791	0.16517	0.19808	0.49175	0.31698	-1.78064	-0.46467	-0.2932	0.29367	0.1189	-1.97872	-0.66275	-0.49128	-0.17477	-2.27239	-0.95642	-0.78495	-2.09762	-0.78165	-0.61018	1.31597	1.48744	0.17147
chr4	11721560	11721569	+	chr4	11720908	11722017	transcript	Gem	0.4791	0.2555	0.12745	0.15958	0.99142	0.69192	0.64599	0.71309	1.37081	1.17555	-0.9211	-0.45543	-0.36858	0.65772	0.46246	-1.63419	-1.16852	-1.08167	-0.19525	-2.2919	-1.82623	-1.73938	-2.09665	-1.63098	-1.54413	0.46567	0.55252	0.08685
chr4	128925192	128925201	+	chr4	128924800	128925499	exon	LOC115489376	0.61652	0.47703	0.4611	0.2238	1.26427	0.872	0.77835	0.31518	0.35599	1.16013	-0.93458	-0.44301	-0.29594	0.0408	0.84494	-1.24977	-0.7582	-0.61112	0.80414	-1.29057	-0.799	-0.65192	-2.09471	-1.60314	-1.45607	0.49157	0.63864	0.14708
chr18	35942326	35942335	+	chr18	35942035	35942516	NA	NA	0.83154	0.72403	0.32816	0.29062	1.54926	0.92099	0.55979	0.17809	1.13204	1.26631	-0.82802	-0.13306	0.50131	0.95395	1.08822	-1.00611	-0.31115	0.32322	0.13427	-1.96006	-1.2651	-0.63073	-2.09434	-1.39938	-0.76501	0.69496	1.32933	0.63437
chr4	62661685	62661694	+	chr4	62661302	62662072	exon	Gm52741	0.0935	0.11343	0.02383	0.05492	0.5426	0.21599	0.18782	-0.14555	0.66905	0.33186	-1.76214	-0.72457	-0.58724	0.8146	0.4774	-1.61659	-0.57902	-0.44169	-0.33719	-2.43119	-1.39362	-1.25629	-2.094	-1.05643	-0.9191	1.03757	1.1749	0.13733
chr6	83273992	83274001	+	chr6	83273572	83274150	CDS	Slc4a5	0.10827	0.0707	0.05101	0.0501	0.52115	0.1641	0.23226	0.29604	0.47943	0.48849	-1.60346	-0.35126	-0.68906	0.18339	0.19246	-1.8995	-0.6473	-0.9851	0.00907	-2.08289	-0.83069	-1.16849	-2.09195	-0.83976	-1.17756	1.2522	0.9144	-0.3378
chr3	69156604	69156613	-	chr3	69156240	69156839	exon	Gm1647	0.13262	0.13645	0.04342	0.03423	0.453	0.19366	0.28854	-0.02415	0.72065	0.82032	-1.27033	-0.34375	-0.75469	0.7448	0.84447	-1.24618	-0.3196	-0.73054	0.09967	-1.99099	-1.0644	-1.47534	-2.09066	-1.16407	-1.57501	0.92658	0.51565	-0.41094
chr8	88662515	88662524	-	chr8	88662271	88662729	CDS	Nod2	0.12286	0.02564	0.01217	0.03579	0.45961	0.15895	0.19637	0.85671	1.02866	0.73947	-1.3511	-0.22185	-0.42071	0.17194	-0.11724	-2.20781	-1.07857	-1.27742	-0.28919	-2.37975	-1.25051	-1.44936	-2.09057	-0.96132	-1.16018	1.12924	0.93039	-0.19886
chr17	48039682	48039691	+	chr17	48039429	48039972	NA	NA	1.20653	0.64806	0.38694	0.28362	1.51453	1.39848	0.83379	0.80928	1.4347	1.78342	-0.30659	-0.19858	0.48712	0.62542	0.97413	-1.11587	-1.00786	-0.32217	0.34872	-1.74129	-1.63327	-0.94758	-2.09001	-1.98199	-1.2963	0.10801	0.79371	0.68569
chr17	3156408	3156417	-	chr17	3156007	3156554	exon	Gm6242	0.27379	0.18511	0.11099	0.18012	1.0719	0.50614	0.39102	0.39774	0.84255	0.42374	-1.66382	-0.70604	-0.39893	0.44481	0.026	-2.06156	-1.10377	-0.79666	-0.41881	-2.50637	-1.54859	-1.24148	-2.08756	-1.12978	-0.82266	0.95778	1.26489	0.30711
chr5	98018316	98018325	+	chr5	98018120	98018570	exon	Gm34226	0.10393	0.07683	0.05886	0.03273	0.44511	0.18884	0.20308	0.21214	0.37224	0.64221	-1.44444	-0.51445	-0.58525	0.1601	0.43007	-1.65658	-0.72659	-0.79739	0.26997	-1.81668	-0.88669	-0.9575	-2.08665	-1.15666	-1.22746	0.92999	0.85918	-0.0708
chr5	98018298	98018307	+	chr5	98018120	98018570	exon	Gm34226	0.17931	0.0858	0.05886	0.04675	0.5037	0.20626	0.23549	0.60346	0.83729	0.95616	-1.12817	-0.13556	-0.26947	0.23383	0.3527	-1.73163	-0.73902	-0.87293	0.11887	-1.96546	-0.97284	-1.10676	-2.08433	-1.09172	-1.22563	0.99261	0.8587	-0.13392
chr14	117625575	117625584	+	chr14	117625233	117625701	CDS	Gpc6	0.12797	0.07064	0	0.03156	0.43923	0.23291	0.1714	0.43048	1.23742	0.82074	-1.26345	-0.55801	-0.25754	0.80694	0.39026	-1.69393	-0.98849	-0.68802	-0.41668	-2.50087	-1.79543	-1.49496	-2.08419	-1.37875	-1.07828	0.70544	1.00591	0.30047
chr8	113656226	113656235	+	chr8	113656063	113656477	transcript	Syce1l	0.06834	0.08672	0.016	0.04189	0.4816	0.13728	0.12735	-0.15451	0.56046	0.25615	-1.82445	-0.50996	-0.44672	0.71497	0.41066	-1.66994	-0.35545	-0.29221	-0.30431	-2.38491	-1.07042	-1.00718	-2.0806	-0.76611	-0.70287	1.31449	1.37774	0.06324
chr9	70591007	70591016	+	chr9	70590789	70591809	CDS	Sltm	0.3328	0.19412	0.07735	0.10601	0.75207	0.30465	0.30273	0.56648	1.31536	1.09253	-0.9868	0.09838	0.10534	0.74887	0.52605	-1.55328	-0.46811	-0.46115	-0.22282	-2.30215	-1.21698	-1.21002	-2.07933	-0.99415	-0.98719	1.08518	1.09214	0.00696
chr7	16910052	16910061	+	chr7	16909979	16910267	3UTR	Ptgir	0.11838	0.09873	0.04388	0.06529	0.57853	0.17018	0.11988	0.13989	0.62232	0.41443	-1.66179	-0.31454	-0.01014	0.48242	0.27453	-1.80168	-0.45443	-0.15004	-0.20789	-2.28411	-0.93686	-0.63246	-2.07622	-0.72897	-0.42457	1.34725	1.65165	0.3044
chr11	75429190	75429199	-	chr11	75429039	75429374	exon	Gm12337	0.18188	0.11772	0.13967	0.06444	0.57473	0.1513	0.22279	0.38149	0.23933	0.79914	-1.27662	0.16933	-0.19932	-0.14216	0.41765	-1.6581	-0.21216	-0.5808	0.5598	-1.51595	-0.07	-0.43865	-2.07575	-0.62981	-0.99845	1.44595	1.0773	-0.36865
chr8	57463055	57463064	-	chr8	57462877	57463194	5UTR	Scrg1	0.08962	0.04516	0.05701	0.02131	0.3928	0.07964	0.06801	0.39935	0.28166	0.67004	-1.40538	0.08051	0.18038	-0.1177	0.27069	-1.80474	-0.31884	-0.21897	0.38839	-1.68704	-0.20114	-0.10128	-2.07543	-0.58953	-0.48967	1.48589	1.58576	0.09987
chr2	13413648	13413657	-	chr2	13413378	13413969	NA	NA	0.38456	0.7002	0.34734	0.11436	0.78425	0.74399	0.58028	-0.7305	0.11675	1.19864	-0.87559	-0.80791	-0.49443	0.84725	1.92915	-0.14509	-0.07741	0.23607	1.0819	-0.99233	-0.92466	-0.61118	-2.07423	-2.00656	-1.69307	0.06768	0.38116	0.31348
chr1	143916722	143916731	-	chr1	143916313	143917015	NA	NA	0.25869	0.13798	0.04853	0.07127	0.60266	0.31262	0.25403	0.60387	1.30563	1.09242	-0.98155	-0.20514	0.01918	0.70176	0.48855	-1.58542	-0.80901	-0.58469	-0.21321	-2.28718	-1.51077	-1.28645	-2.07397	-1.29756	-1.07324	0.7764	1.00072	0.22432
chr17	7925857	7925866	+	chr17	7925736	7926086	5UTR	Tagap	0.16013	0.15475	0.09251	0.06451	0.57316	0.27201	0.27951	0.03084	0.4458	0.68014	-1.39159	-0.52588	-0.55513	0.41496	0.6493	-1.42243	-0.55672	-0.58597	0.23434	-1.83739	-0.97168	-1.00093	-2.07173	-1.20602	-1.23526	0.86571	0.83646	-0.02924
chr2	19004996	19005005	-	chr2	19004722	19005235	exon	4930426L09Rik	0.11833	0.07731	0.09402	0.09665	0.70797	0.22067	0.1345	0.30929	0.1752	0.15519	-1.91599	-0.56698	-0.10577	-0.13409	-0.1541	-2.22528	-0.87627	-0.41506	-0.02001	-2.09119	-0.74218	-0.28097	-2.07118	-0.72217	-0.26095	1.34901	1.81023	0.46121
chr11	115139136	115139145	-	chr11	115138869	115139189	NA	NA	0.07458	0.06534	0.03477	0.02503	0.40636	0.19299	0.14486	0.0812	0.38798	0.50122	-1.56812	-0.76669	-0.5021	0.30678	0.42002	-1.64932	-0.84789	-0.5833	0.11324	-1.95609	-1.15466	-0.89008	-2.06933	-1.2679	-1.00332	0.80143	1.06601	0.26458
chr9	46314711	46314720	-	chr9	46314519	46314824	5UTR	4931429L15Rik	0.39958	0.42305	0.43289	0.26515	1.41249	0.64435	0.3638	-0.06699	-0.09417	0.45842	-1.60934	-0.58078	0.10851	-0.02718	0.52541	-1.54236	-0.51379	0.1755	0.5526	-1.51517	-0.48661	0.20268	-2.06777	-1.0392	-0.34991	1.02857	1.71785	0.68929
chr5	20702116	20702125	+	chr5	20701489	20702866	transcript	Magi2	0.79231	0.57753	0.23348	0.23523	1.28682	0.83454	0.86554	0.40023	1.43571	1.42803	-0.6395	-0.06713	-0.1145	1.03548	1.0278	-1.03973	-0.46736	-0.51473	-0.00768	-2.07521	-1.50284	-1.55021	-2.06752	-1.49516	-1.54253	0.57236	0.525	-0.04737
chr5	147363217	147363226	+	chr5	147363077	147363453	5UTR	Flt3	0.07711	0.03232	0	0.05871	0.54688	0.18182	0.17489	0.43709	0.86247	0.16388	-1.90359	-0.688	-0.65133	0.42537	-0.27322	-2.34068	-1.1251	-1.08842	-0.69859	-2.76605	-1.55047	-1.51379	-2.06746	-0.85188	-0.8152	1.21558	1.25226	0.03668
chr13	90516035	90516044	-	chr13	90515774	90516404	NA	NA	0.1887	0.07815	0.03498	0.02124	0.38967	0.17718	0.16945	0.71479	1.13061	1.29278	-0.77422	0.05997	0.10165	0.41582	0.57799	-1.48901	-0.65482	-0.61314	0.16217	-1.90483	-1.07064	-1.02896	-2.067	-1.23281	-1.19113	0.83419	0.87587	0.04168
chr4	137345954	137345963	+	chr4	137345686	137346140	5UTR	Cdc42	0.08728	0.08371	0.05364	0.0208	0.38772	0.2176	0.18701	0.02865	0.29568	0.65795	-1.40874	-0.78064	-0.6317	0.26703	0.62929	-1.43739	-0.8093	-0.66035	0.36226	-1.70442	-1.07633	-0.92738	-2.06668	-1.43859	-1.28964	0.62809	0.77704	0.14895
chr7	63755734	63755743	-	chr7	63755627	63755900	CDS	Otud7a	0.34087	0.15897	0.15471	0.12733	0.83395	0.53927	0.3481	0.78102	0.8055	0.97359	-1.09302	-0.54198	-0.02377	0.02448	0.19256	-1.87404	-1.323	-0.8048	0.16809	-1.89852	-1.34748	-0.82927	-2.06661	-1.51556	-0.99736	0.55105	1.06925	0.5182
chr8	121187930	121187939	+	chr8	121187671	121188092	transcript	Gm42046	0.23731	0.13839	0.12325	0.06232	0.5614	0.3129	0.18738	0.51117	0.60825	1.08246	-0.98366	-0.29629	0.23547	0.09708	0.57129	-1.49483	-0.80746	-0.2757	0.47421	-1.59191	-0.90455	-0.37279	-2.06612	-1.37875	-0.84699	0.68737	1.21912	0.53176
chr4	118144539	118144548	-	chr4	118144333	118144696	CDS	Kdm4a	0.10114	0.10324	0.08207	0.07125	0.59806	0.19026	0.1598	-0.01542	0.14816	0.23953	-1.82506	-0.54212	-0.37876	0.16358	0.25495	-1.80964	-0.5267	-0.36333	0.09136	-1.97322	-0.69028	-0.52692	-2.06459	-0.78165	-0.61828	1.28294	1.44631	0.16337
chr8	126849775	126849784	-	chr8	126849637	126850261	transcript	A630001O12Rik	0.18492	0.17707	0.10926	0.09195	0.68412	0.31513	0.16333	0.04115	0.45604	0.58429	-1.47931	-0.5523	0.11612	0.4149	0.54314	-1.52046	-0.59345	0.07497	0.12825	-1.93536	-1.00834	-0.33992	-2.0636	-1.13659	-0.46817	0.92702	1.59544	0.66842
chr10	98946239	98946248	+	chr10	98946091	98946358	5UTR	Atp2b1	0.06294	0.067	0.05496	0	0.29971	0.15528	0.13621	-0.03679	0.07517	0.73794	-1.32554	-0.6667	-0.55201	0.11195	0.77473	-1.28875	-0.62991	-0.51522	0.66278	-1.4007	-0.74187	-0.62717	-2.06348	-1.40465	-1.28995	0.65884	0.77353	0.1147
chr7	143473644	143473653	-	chr7	143473465	143473871	5UTR	Slc22a18	0.22021	0.15637	0.09043	0.07774	0.62246	0.252	0.18833	0.32737	0.76785	0.87055	-1.18851	-0.13894	0.15422	0.44047	0.54318	-1.51589	-0.46631	-0.17316	0.1027	-1.95636	-0.90679	-0.61363	-2.05906	-1.00949	-0.71633	1.04958	1.34273	0.29315
chr6	99241768	99241777	-	chr6	99241527	99242063	5UTR	Foxp1	0.20381	0.11533	0.11054	0.05898	0.54419	0.25	0.33504	0.5081	0.54146	0.9599	-1.09895	-0.20785	-0.52635	0.03336	0.4518	-1.60705	-0.71596	-1.03445	0.41845	-1.64041	-0.74931	-1.06781	-2.05885	-1.16776	-1.48625	0.89109	0.5726	-0.3185
chr11	59637148	59637157	+	chr11	59636911	59637341	exon	Gm33998	0.29653	0.27143	0.14508	0.08518	0.65293	0.40938	0.26143	0.09577	0.70736	1.12294	-0.9351	-0.36601	0.13578	0.61158	1.02716	-1.03087	-0.46178	0.04	0.41558	-1.64245	-1.07336	-0.57158	-2.05803	-1.48894	-0.98716	0.56909	1.07088	0.50178
chr7	143038757	143038766	-	chr7	143038269	143038890	exon	R74862	0.24291	0.12708	0.05039	0.09321	0.68581	0.23309	0.39991	0.60723	1.22097	0.84685	-1.21015	0.04264	-0.55154	0.61373	0.23962	-1.81739	-0.56459	-1.15878	-0.37412	-2.43112	-1.17832	-1.77251	-2.057	-0.80421	-1.3984	1.2528	0.65861	-0.59419
chr3	108850796	108850805	+	chr3	108850446	108850929	3UTR	Fndc7	0.14152	0.13241	0.05944	0.03873	0.45835	0.26072	0.17389	0.05685	0.61736	0.82617	-1.22886	-0.59032	-0.18561	0.56051	0.76932	-1.28571	-0.64717	-0.24246	0.20881	-1.84621	-1.20767	-0.80296	-2.05503	-1.41649	-1.01178	0.63854	1.04325	0.40471
chr16	59604207	59604216	+	chr16	59604099	59604447	3UTR	Arl6	0.09141	0.11287	0.07491	0.02152	0.38669	0.19135	0.17214	-0.1578	0.13427	0.6814	-1.37319	-0.62133	-0.52088	0.29208	0.83921	-1.21539	-0.46353	-0.36307	0.54713	-1.50747	-0.75561	-0.65515	-2.0546	-1.30273	-1.20228	0.75186	0.85232	0.10046
chr4	3627171	3627180	+	chr4	3626665	3627340	NA	NA	0.08798	0.07971	0.07094	0.03077	0.42509	0.12429	0.13472	0.067	0.14163	0.5436	-1.51092	-0.26214	-0.3294	0.07463	0.4766	-1.57792	-0.32914	-0.3964	0.40197	-1.65255	-0.40377	-0.47103	-2.05452	-0.80574	-0.873	1.24878	1.18152	-0.06726
chr17	73893345	73893354	+	chr17	73893273	73894230	CDS	Xdh	0.13839	0.14102	0.09261	0.05617	0.53047	0.24842	0.26438	-0.01622	0.31614	0.6291	-1.42511	-0.55872	-0.6244	0.33236	0.64532	-1.40889	-0.5425	-0.60818	0.31296	-1.74125	-0.87486	-0.94054	-2.05421	-1.18782	-1.2535	0.86639	0.80071	-0.06568
chr5	148342607	148342616	+	chr5	148342087	148343204	CDS	Slc7a1	0.8965	0.75826	0.40147	0.23644	1.27892	1.21682	0.89676	0.2168	0.999	1.58304	-0.47092	-0.40415	-0.00038	0.78219	1.36624	-0.68772	-0.62096	-0.21718	0.58405	-1.46991	-1.40315	-0.99937	-2.05396	-1.98719	-1.58342	0.06677	0.47054	0.40377
chr17	87985044	87985053	+	chr17	87984833	87985231	CDS	Msh6	0.0927	0.11082	0.04492	0.033	0.43394	0.1608	0.13706	-0.13346	0.4258	0.55499	-1.4984	-0.44813	-0.30718	0.55927	0.68845	-1.36494	-0.31466	-0.17371	0.12918	-1.92421	-0.87393	-0.73298	-2.05339	-1.00311	-0.86216	1.05028	1.19123	0.14095
chr4	59331883	59331892	-	chr4	59330919	59332056	CDS	Susd1	0.56331	0.73145	0.40776	0.25111	1.33778	0.66677	0.74268	-0.3285	0.38941	0.92902	-1.12287	-0.21081	-0.34798	0.7179	1.25752	-0.79437	0.11768	-0.01949	0.53962	-1.51227	-0.60022	-0.73739	-2.05189	-1.13983	-1.27701	0.91206	0.77488	-0.13717
chr7	4647459	4647468	+	chr7	4647223	4647681	exon	Ppp6r1	0.45391	0.42707	0.20575	0.24313	1.30457	0.5217	0.47215	0.07243	0.86963	0.70022	-1.35154	-0.16822	-0.04722	0.79721	0.62779	-1.42397	-0.24064	-0.11965	-0.16941	-2.22118	-1.03785	-0.91686	-2.05176	-0.86844	-0.74745	1.18333	1.30432	0.12099
chr8	126758120	126758129	+	chr8	126757697	126758403	exon	Gm45805	0.17296	0.0945	0.18086	0.12423	0.81125	0.30499	0.34758	0.5015	-0.04203	0.29047	-1.76074	-0.57928	-0.72552	-0.54353	-0.21102	-2.26224	-1.08078	-1.22701	0.33251	-1.71871	-0.53725	-0.68348	-2.05121	-0.86976	-1.01599	1.18146	1.03522	-0.14624
chr17	83695963	83695972	-	chr17	83695833	83696102	NA	NA	0.15227	0.15409	0.09559	0.08612	0.65321	0.23916	0.24613	-0.01061	0.37692	0.45075	-1.60029	-0.43559	-0.46544	0.38753	0.46136	-1.58968	-0.42498	-0.45483	0.07382	-1.97721	-0.81251	-0.84236	-2.05104	-0.88634	-0.91619	1.1647	1.13485	-0.02985
chr12	33045872	33045881	-	chr12	33045724	33046050	transcript	Gm40874	0.06903	0.06344	0.05285	0.04159	0.46825	0.13243	0.1208	0.05026	0.15055	0.26544	-1.78451	-0.47331	-0.39732	0.10029	0.21518	-1.83476	-0.52357	-0.44758	0.11489	-1.93506	-0.62386	-0.54787	-2.04994	-0.73875	-0.66276	1.3112	1.38718	0.07598
chr2	50519024	50519033	+	chr2	50518792	50519398	exon	Gm13487	0.06384	0.0516	0.06009	0.00807	0.32942	0.07265	0.08747	0.11626	0.03463	0.62766	-1.42219	-0.07824	-0.20097	-0.08163	0.5114	-1.53846	-0.1945	-0.31723	0.59302	-1.45683	-0.11287	-0.23561	-2.04985	-0.7059	-0.82863	1.34396	1.22122	-0.12273
chr7	139131717	139131726	-	chr7	139131528	139131873	5UTR	Stk32c	0.05385	0.06453	0.07366	0.04804	0.49461	0.15049	0.15933	-0.10046	-0.18112	0.05774	-1.99135	-0.72468	-0.77587	-0.08066	0.15819	-1.8909	-0.62422	-0.67541	0.23885	-1.81024	-0.54356	-0.59475	-2.04909	-0.78242	-0.83361	1.26667	1.21548	-0.05119
chr1	165691662	165691671	+	chr1	165691497	165691857	NA	NA	0.15426	0.18697	0.06418	0.08121	0.63111	0.2103	0.19074	-0.1784	0.64946	0.50216	-1.54539	-0.29338	-0.19761	0.82785	0.68056	-1.367	-0.11498	-0.01921	-0.1473	-2.19485	-0.94283	-0.84707	-2.04756	-0.79554	-0.69977	1.25202	1.34779	0.09577
chr7	79314715	79314724	-	chr7	79314532	79314833	NA	NA	0.14401	0.16087	0.15655	0.07685	0.61299	0.27426	0.19307	-0.09864	-0.074	0.4777	-1.56966	-0.62917	-0.27012	0.02464	0.57634	-1.47102	-0.53053	-0.17148	0.5517	-1.49566	-0.55517	-0.19612	-2.04736	-1.10686	-0.74782	0.9405	1.29954	0.35905
chr7	25706993	25707002	-	chr7	25706751	25707200	transcript	Tgfb1	0.18592	0.0986	0.09417	0.06218	0.55149	0.22809	0.26991	0.53882	0.57235	0.84079	-1.20465	-0.20228	-0.37827	0.03353	0.30196	-1.74347	-0.7411	-0.91709	0.26843	-1.777	-0.77463	-0.95062	-2.04544	-1.04307	-1.21906	1.00237	0.82638	-0.17599
chr16	30968556	30968565	+	chr16	30968418	30968875	exon	Gm15742	0.11399	0.05366	0.01722	0.04123	0.46343	0.11854	0.1778	0.49353	0.90159	0.62017	-1.42119	-0.03118	-0.38562	0.40806	0.12664	-1.91472	-0.52471	-0.87915	-0.28142	-2.32278	-0.93277	-1.28722	-2.04136	-0.65135	-1.00579	1.39001	1.03557	-0.35444
chr9	45246297	45246306	-	chr9	45246096	45246539	transcript	BC049352	0.08003	0.11121	0.01735	0.0428	0.46987	0.17696	0.19125	-0.23745	0.64307	0.3467	-1.6946	-0.638	-0.71208	0.88052	0.58416	-1.45714	-0.40055	-0.47463	-0.29637	-2.33767	-1.28107	-1.35515	-2.0413	-0.98471	-1.05879	1.05659	0.98251	-0.07408
chr1	128712989	128712998	-	chr1	128712523	128713296	NA	NA	0.18252	0.10131	0.08526	0.07631	0.60762	0.24848	0.20698	0.50108	0.62462	0.69841	-1.34252	-0.30838	-0.12218	0.12355	0.19733	-1.84359	-0.80946	-0.62325	0.07378	-1.96714	-0.93301	-0.7468	-2.04092	-1.00679	-0.82059	1.03413	1.22034	0.18621
chr13	117034124	117034133	-	chr13	117033432	117034244	NA	NA	0.10593	0.04602	0.05518	0.06462	0.55911	0.10766	0.13924	0.51309	0.42183	0.33345	-1.70658	-0.01241	-0.22206	-0.09126	-0.17964	-2.21967	-0.52551	-0.73515	-0.08838	-2.12841	-0.43424	-0.64389	-2.04003	-0.34587	-0.55551	1.69417	1.48452	-0.20965
chr2	14631683	14631692	+	chr2	14631583	14632021	NA	NA	0.06443	0.05008	0.02623	0.02081	0.3782	0.27697	0.18961	0.13675	0.39733	0.46373	-1.57404	-1.22615	-0.83906	0.26058	0.32698	-1.71079	-1.3629	-0.97581	0.06641	-1.97137	-1.62348	-1.23639	-2.03778	-1.68989	-1.30279	0.34789	0.73498	0.38709
chr2	165405183	165405192	+	chr2	165405029	165405701	3UTR	Slc13a3	0.1164	0.07013	0.03643	0.04248	0.4671	0.21237	0.08459	0.35781	0.68881	0.62352	-1.41405	-0.5416	0.23618	0.331	0.2657	-1.77187	-0.89942	-0.12163	-0.06529	-2.10286	-1.23041	-0.45263	-2.03757	-1.16512	-0.38734	0.87245	1.65023	0.77778
chr7	81199958	81199967	-	chr7	81199816	81200092	NA	NA	0.05654	0.02641	0.04042	0.04328	0.47029	0.19616	0.15957	0.32159	0.16311	0.13279	-1.90454	-0.94555	-0.75126	-0.15848	-0.1888	-2.22613	-1.26714	-1.07286	-0.03032	-2.06765	-1.10866	-0.91438	-2.03733	-1.07834	-0.88406	0.95898	1.15327	0.19429
chr6	15846071	15846080	+	chr6	15845923	15846261	NA	NA	0.17631	0.03004	0.04477	0.02144	0.38038	0.15177	0.20445	1.12224	0.96066	1.22568	-0.81085	0.13717	-0.14275	-0.16158	0.10345	-1.93309	-0.98507	-1.26499	0.26503	-1.77151	-0.82348	-1.1034	-2.03654	-1.08851	-1.36843	0.94803	0.66811	-0.27992
chr9	111081031	111081040	-	chr9	111080788	111081221	exon	Gm26409	0.04451	0.03416	0.05099	0.02052	0.37597	0.15239	0.10432	0.11183	-0.06585	0.27385	-1.76074	-0.82982	-0.51706	-0.17768	0.16201	-1.87258	-0.94165	-0.62889	0.33969	-1.6949	-0.76397	-0.45121	-2.03459	-1.10366	-0.7909	0.93093	1.24369	0.31276
chr4	133169700	133169709	+	chr4	133169233	133170056	transcript	Wasf2	0.76309	0.46346	0.21119	0.19405	1.08655	0.64792	0.6522	0.62035	1.48898	1.5723	-0.46183	0.20812	0.19982	0.86863	0.95194	-1.08218	-0.41223	-0.42053	0.08332	-1.9508	-1.28086	-1.28916	-2.03412	-1.36418	-1.37247	0.66994	0.66165	-0.0083
chr11	64600595	64600604	+	chr11	64600277	64600884	NA	NA	0.22214	0.13775	0.07711	0.06442	0.5555	0.29985	0.23299	0.44758	0.88467	0.99567	-1.03818	-0.31686	-0.04865	0.43709	0.5481	-1.48576	-0.76444	-0.49622	0.111	-1.92285	-1.20153	-0.93332	-2.03386	-1.31253	-1.04432	0.72132	0.98954	0.26821
chr17	64754286	64754295	-	chr17	64754081	64754835	transcript	Man2a1	0.15451	0.09875	0.10355	0.0636	0.55187	0.21235	0.28322	0.36615	0.33071	0.6562	-1.37705	-0.3016	-0.60161	-0.03544	0.29005	-1.7432	-0.66776	-0.96776	0.32549	-1.70776	-0.63232	-0.93232	-2.03325	-0.9578	-1.25781	1.07544	0.77544	-0.3
chr2	6251164	6251173	-	chr2	6250911	6251537	exon	A230108P19Rik	0.10998	0.1049	0.09878	0.10283	0.7122	0.16849	0.1724	0.03634	0.08137	0.05141	-1.98139	-0.36344	-0.38475	0.04503	0.01507	-2.01773	-0.39978	-0.42109	-0.02996	-2.06276	-0.44481	-0.46612	-2.0328	-0.41485	-0.43617	1.61795	1.59664	-0.02131
chr12	69516711	69516720	-	chr12	69516388	69516866	transcript	Gm31512	0.49539	0.17983	0.12319	0.11292	0.75346	0.32121	0.37575	1.10524	1.43922	1.50902	-0.52374	0.50512	0.32717	0.33398	0.40378	-1.62897	-0.60011	-0.77806	0.0698	-1.96295	-0.93409	-1.11204	-2.03276	-1.00389	-1.18185	1.02886	0.85091	-0.17795
chr6	52477556	52477565	+	chr6	52477358	52477785	NA	NA	0.15416	0.09456	0.03952	0.05307	0.50797	0.1666	0.21569	0.39579	0.89297	0.75377	-1.27757	-0.0705	-0.31927	0.49718	0.35798	-1.67336	-0.46629	-0.71505	-0.1392	-2.17054	-0.96347	-1.21223	-2.03134	-0.82427	-1.07304	1.20707	0.9583	-0.24877
chr10	75055836	75055845	+	chr10	75055737	75056546	transcript	Rab36	0.231	0.16144	0.16989	0.0936	0.67328	0.17559	0.20276	0.34715	0.30025	0.79197	-1.23867	0.26944	0.13104	-0.04691	0.44481	-1.58583	-0.07771	-0.21612	0.49172	-1.53892	-0.0308	-0.16921	-2.03064	-0.52252	-0.66093	1.50812	1.36971	-0.13841
chr7	49454798	49454807	-	chr7	49454659	49454982	CDS	Nav2	0.13565	0.11625	0.05379	0.06659	0.56267	0.24459	0.18843	0.12719	0.63502	0.51538	-1.51471	-0.5596	-0.29816	0.50783	0.38819	-1.6419	-0.68678	-0.42535	-0.11964	-2.14973	-1.19462	-0.93318	-2.03009	-1.07498	-0.81354	0.95511	1.21655	0.26143
chr16	59604291	59604300	+	chr16	59604099	59604447	3UTR	Arl6	0.09973	0.04725	0.03101	0.04092	0.45634	0.15439	0.14745	0.45511	0.63098	0.52113	-1.50507	-0.35815	-0.31731	0.17588	0.06603	-1.96018	-0.81326	-0.77242	-0.10985	-2.13605	-0.98913	-0.94829	-2.0262	-0.87928	-0.83844	1.14692	1.18776	0.04084
chr5	123151217	123151226	-	chr5	123151094	123151463	CDS	Setd1b	0.22638	0.58652	0.31038	0.20026	1.10518	0.51461	0.24456	-1.08626	-0.33569	0.12259	-1.90337	-0.9252	-0.07957	0.75056	1.20885	-0.81711	0.16106	1.00669	0.45829	-1.56767	-0.58951	0.25613	-2.02596	-1.04779	-0.20216	0.97817	1.8238	0.84563
chr19	12435305	12435314	+	chr19	12434850	12435616	transcript	Pfpl	0.05769	0.04051	0.02069	0.00103	0.29323	0.14791	0.08799	0.17311	0.40262	0.67326	-1.35062	-0.67246	-0.26234	0.22951	0.50015	-1.52373	-0.84557	-0.43545	0.27064	-1.75324	-1.07508	-0.66496	-2.02388	-1.34572	-0.93559	0.67816	1.08828	0.41012
chr18	60744700	60744709	-	chr18	60744608	60744966	5UTR	Ndst1	0.18242	0.1006	0.05754	0.08766	0.64549	0.22218	0.2226	0.5058	0.86609	0.60494	-1.41885	-0.19372	-0.19563	0.36029	0.09914	-1.92465	-0.69952	-0.70144	-0.26115	-2.28494	-1.05981	-1.06172	-2.02379	-0.79866	-0.80058	1.22513	1.22322	-0.00191
chr1	191403274	191403283	-	chr1	191403114	191403465	NA	NA	0.26816	0.26602	0.10123	0.10099	0.69949	0.32346	0.30553	0.00854	0.8906	0.89237	-1.13104	-0.20488	-0.14158	0.88206	0.88383	-1.13959	-0.21342	-0.15013	0.00177	-2.02165	-1.09548	-1.03219	-2.02342	-1.09725	-1.03396	0.92616	0.98946	0.0633
chr2	129586312	129586321	+	chr2	129585781	129586563	NA	NA	0.12424	0.06775	0.04189	0.06348	0.54695	0.15553	0.13688	0.43157	0.68248	0.47011	-1.55321	-0.19309	-0.08114	0.2509	0.03854	-1.98478	-0.62466	-0.51271	-0.21237	-2.23568	-0.87557	-0.76361	-2.02332	-0.6632	-0.55125	1.36012	1.47207	0.11195
chr10	22306574	22306583	+	chr10	22306378	22306817	exon	C920009B18Rik	0.10891	0.1066	0.03433	0.02969	0.40923	0.13109	0.16256	0.0165	0.65995	0.71297	-1.30932	-0.14949	-0.33809	0.64345	0.69648	-1.32582	-0.16598	-0.35458	0.05302	-1.96927	-0.80944	-0.99804	-2.02229	-0.86246	-1.05106	1.15983	0.97123	-0.1886
chr6	129434394	129434403	+	chr6	129434220	129434659	CDS	Clec1a	0.06972	0.02374	0.02956	0.04586	0.47461	0.14789	0.17294	0.47477	0.4053	0.22687	-1.79464	-0.56241	-0.70443	-0.06946	-0.2479	-2.26941	-1.03718	-1.1792	-0.17843	-2.19995	-0.96771	-1.10974	-2.02151	-0.78928	-0.93131	1.23223	1.09021	-0.14202
chr8	119424970	119424979	+	chr8	119424859	119425151	exon	Gm32006	0.23779	0.09955	0.08091	0.08301	0.62512	0.21503	0.2331	0.77679	0.92268	0.90549	-1.11538	0.10244	0.02052	0.1459	0.1287	-1.89217	-0.67434	-0.75627	-0.01719	-2.03806	-0.82024	-0.90216	-2.02087	-0.80305	-0.88497	1.21782	1.1359	-0.08192
chr3	60080714	60080723	+	chr3	60080584	60081277	5UTR	Sucnr1	0.09341	0.0892	0.03871	0.04085	0.45364	0.20027	0.14267	0.03273	0.49713	0.47409	-1.54577	-0.65024	-0.33628	0.46439	0.44136	-1.5785	-0.68298	-0.36901	-0.02304	-2.04289	-1.14737	-0.83341	-2.01986	-1.12434	-0.81037	0.89552	1.20949	0.31397
chr13	112366023	112366032	-	chr13	112365793	112366136	CDS	Ankrd55	0.11233	0.05471	0.05494	0.04767	0.4812	0.16447	0.23528	0.47178	0.46955	0.54162	-1.47799	-0.32469	-0.67371	-0.00223	0.06985	-1.94977	-0.79647	-1.14548	0.07207	-1.94754	-0.79424	-1.14326	-2.01961	-0.86631	-1.21533	1.1533	0.80428	-0.34902
chr6	87806195	87806204	-	chr6	87806106	87806357	CDS	Rab43	0.40879	0.25871	0.1786	0.11726	0.7632	0.45028	0.56979	0.51117	0.88257	1.24995	-0.76938	-0.11434	-0.4006	0.3714	0.73878	-1.28055	-0.62551	-0.91177	0.36738	-1.65194	-0.9969	-1.28316	-2.01933	-1.36429	-1.65054	0.65504	0.36878	-0.28626
chr2	91184039	91184048	+	chr2	91183668	91184150	transcript	Madd	0.72953	0.512	0.34854	0.21896	1.17536	0.94987	0.71477	0.44235	0.89564	1.39513	-0.62405	-0.34196	0.02608	0.45329	0.95278	-1.0664	-0.7843	-0.41626	0.49949	-1.51969	-1.23759	-0.86955	-2.01918	-1.73709	-1.36905	0.2821	0.65014	0.36804
chr14	70066300	70066309	+	chr14	70065634	70066404	transcript	Pebp4	0.11649	0.07542	0.0286	0.05668	0.51752	0.1847	0.08545	0.31273	0.77857	0.48158	-1.53753	-0.40454	0.22987	0.46583	0.16885	-1.85026	-0.71728	-0.08286	-0.29698	-2.31609	-1.18311	-0.54869	-2.01911	-0.88613	-0.25171	1.13298	1.7674	0.63442
chr14	73442041	73442050	+	chr14	73441940	73442422	NA	NA	0.13413	0.06329	0.1071	0.08444	0.62977	0.15475	0.18485	0.53572	0.18173	0.35398	-1.66459	-0.12471	-0.28935	-0.35399	-0.18174	-2.20031	-0.66043	-0.82506	0.17225	-1.84632	-0.30644	-0.47108	-2.01857	-0.47869	-0.64332	1.53988	1.37525	-0.16464
chr10	78134600	78134609	-	chr10	78134451	78134775	exon	Gm47922	0.1423	0.1072	0.04023	0.05334	0.50328	0.17801	0.18805	0.23172	0.81475	0.68055	-1.33687	-0.20284	-0.25508	0.58303	0.44883	-1.56859	-0.43456	-0.48681	-0.1342	-2.15162	-1.01759	-1.06984	-2.01742	-0.88339	-0.93563	1.13403	1.08178	-0.05224
chr11	115004283	115004292	+	chr11	115003985	115004590	3UTR	Cd300ld4	0.09456	0.05027	0.02368	0.06181	0.53731	0.11507	0.24049	0.38567	0.679	0.27483	-1.74198	-0.14877	-0.82611	0.29334	-0.11083	-2.12765	-0.53444	-1.21177	-0.40417	-2.42099	-0.82778	-1.50511	-2.01682	-0.42361	-1.10094	1.59321	0.91588	-0.67733
chr11	117483104	117483113	+	chr11	117482315	117483440	transcript	Gm34418	0.16352	0.10224	0.05944	0.04144	0.45448	0.21679	0.1065	0.39163	0.74606	0.92577	-1.09001	-0.27102	0.36068	0.35443	0.53414	-1.48164	-0.66264	-0.03094	0.17971	-1.83607	-1.01708	-0.38538	-2.01578	-1.19679	-0.56509	0.819	1.4507	0.6317
chr7	19266002	19266011	+	chr7	19265909	19266762	CDS	Vasp	0.18198	0.20765	0.21064	0.12625	0.79672	0.33439	0.16529	-0.1282	-0.14242	0.32509	-1.68951	-0.6339	0.08991	-0.01422	0.45329	-1.56131	-0.5057	0.21811	0.46751	-1.54709	-0.49148	0.23233	-2.0146	-0.95899	-0.23518	1.05561	1.77942	0.72381
chr10	41595793	41595802	-	chr10	41594936	41595957	CDS	Ccdc162	0.15708	0.08655	0.09154	0.0654	0.55069	0.16507	0.20833	0.47519	0.43591	0.65467	-1.35958	-0.04515	-0.26773	-0.03928	0.17948	-1.83477	-0.52034	-0.74292	0.21876	-1.79549	-0.48106	-0.70364	-2.01425	-0.69982	-0.9224	1.31443	1.09185	-0.22258
chr2	71814238	71814247	+	chr2	71813892	71814336	NA	NA	1.06351	0.90986	0.35885	0.41623	1.96666	1.37572	1.26451	0.20542	1.35343	1.18141	-0.83195	-0.34445	-0.23095	1.14802	0.97599	-1.03736	-0.54987	-0.43637	-0.17202	-2.18538	-1.69789	-1.58439	-2.01336	-1.52586	-1.41236	0.48749	0.60099	0.1135
chr4	129032872	129032881	-	chr4	129032221	129033061	NA	NA	0.25425	0.10324	0.10383	0.08691	0.63631	0.32635	0.3048	0.81938	0.81508	0.94389	-1.06784	-0.27129	-0.19541	-0.0043	0.12452	-1.88722	-1.09067	-1.01479	0.12882	-1.88292	-1.08637	-1.01049	-2.01174	-1.21518	-1.13931	0.79655	0.87243	0.07588
chr17	87247152	87247161	-	chr17	87246814	87247281	3UTR	Mcfd2	0.14167	0.09903	0.06114	0.09826	0.68204	0.37328	0.3887	0.28761	0.6024	0.29336	-1.7183	-0.98676	-1.03358	0.3148	0.00576	-2.0059	-1.27437	-1.32118	-0.30904	-2.3207	-1.58917	-1.63598	-2.01166	-1.28013	-1.32694	0.73154	0.68472	-0.04681
chr15	78244798	78244807	-	chr15	78244625	78245376	exon	Ncf4	0.11682	0.11127	0.06637	0.10902	0.72526	0.23037	0.20409	0.03844	0.39407	0.05432	-1.95704	-0.62103	-0.49924	0.35563	0.01588	-1.99548	-0.65947	-0.53768	-0.33975	-2.35111	-1.0151	-0.89331	-2.01136	-0.67535	-0.55356	1.33601	1.4578	0.12179
chr16	94241343	94241352	+	chr16	94241099	94241514	exon	Gm6363	0.16158	0.18534	0.1639	0.06513	0.54817	0.2733	0.24661	-0.12813	-0.01302	0.68271	-1.32833	-0.52276	-0.41399	0.1151	0.81084	-1.2002	-0.39463	-0.28587	0.69574	-1.31531	-0.50973	-0.40097	-2.01105	-1.20547	-1.09671	0.80558	0.91434	0.10876
chr5	124929623	124929632	-	chr5	124929472	124930022	NA	NA	0.10781	0.11112	0.03864	0.02412	0.38279	0.21285	0.26262	-0.02344	0.60455	0.77148	-1.23933	-0.60392	-0.82061	0.62799	0.79492	-1.21588	-0.58048	-0.79717	0.16693	-1.84388	-1.20848	-1.42517	-2.01081	-1.37541	-1.5921	0.6354	0.41871	-0.21669
chr4	8837667	8837676	+	chr4	8837467	8837854	CDS	Chd7	0.06958	0.07668	0.04401	0.01073	0.32861	0.17559	0.15842	-0.06121	0.24482	0.64209	-1.36798	-0.7199	-0.62505	0.30602	0.70329	-1.30677	-0.6587	-0.56385	0.39727	-1.6128	-0.96472	-0.86987	-2.01007	-1.36199	-1.26714	0.64808	0.74293	0.09485
chr6	126849214	126849223	+	chr6	126848456	126849443	CDS	Ndufa9	0.4081	0.36721	0.56065	0.25688	1.3195	0.58621	0.68288	0.12249	-0.38258	0.51669	-1.49276	-0.43782	-0.62946	-0.50507	0.3942	-1.61525	-0.5603	-0.75195	0.89927	-1.11018	-0.05524	-0.24688	-2.00945	-0.95451	-1.14615	1.05494	0.8633	-0.19165
chr4	156067740	156067749	+	chr4	156067255	156067917	exon	Gm52714	0.18665	0.1063	0.04039	0.08269	0.61809	0.18764	0.17287	0.48609	1.06095	0.6668	-1.34251	-0.00508	0.07257	0.57485	0.1807	-1.8286	-0.49117	-0.41353	-0.39415	-2.40346	-1.06603	-0.98838	-2.00931	-0.67187	-0.59423	1.33743	1.41508	0.07764
chr2	168883221	168883230	-	chr2	168883064	168883355	NA	NA	0.08138	0.05497	0.04283	0.02103	0.36975	0.12128	0.14053	0.2351	0.35752	0.6074	-1.40159	-0.29535	-0.41877	0.12242	0.3723	-1.63668	-0.53045	-0.65387	0.24988	-1.75911	-0.65287	-0.77629	-2.00898	-0.90275	-1.02617	1.10624	0.98282	-0.12342
chr18	80702657	80702666	+	chr18	80702504	80702764	CDS	Nfatc1	0.19961	0.08583	0.0543	0.04144	0.45172	0.12991	0.14085	0.70649	0.98418	1.11481	-0.89369	0.3906	0.32185	0.27769	0.40832	-1.60018	-0.31589	-0.38464	0.13063	-1.87787	-0.59358	-0.66233	-2.00851	-0.72421	-0.79296	1.28429	1.21555	-0.06875
chr17	28894570	28894579	-	chr17	28894345	28894748	3UTR	Bnip5	0.2222	0.16775	0.06394	0.06493	0.54623	0.13197	0.14995	0.27241	1.00032	0.99132	-1.01718	0.48425	0.37391	0.72791	0.71891	-1.28959	0.21184	0.1015	-0.009	-2.0175	-0.51607	-0.6264	-2.00849	-0.50707	-0.6174	1.50143	1.39109	-0.11034
chr8	94365487	94365496	-	chr8	94365306	94365657	CDS	Slc12a3	1.07076	0.51116	0.35528	0.30869	1.52607	0.9171	0.89644	0.94436	1.37385	1.53171	-0.47594	0.20406	0.23384	0.4295	0.58735	-1.42029	-0.7403	-0.71052	0.15785	-1.84979	-1.16979	-1.14002	-2.00764	-1.32765	-1.29787	0.68	0.70977	0.02978
chr15	79357150	79357159	-	chr15	79356975	79357332	CDS	Maff	0.24709	0.26639	0.15342	0.09307	0.65891	0.31008	0.39427	-0.07935	0.46279	0.8657	-1.14175	-0.24432	-0.51721	0.54214	0.94505	-1.0624	-0.16497	-0.43786	0.40291	-1.60454	-0.70711	-0.98	-2.00745	-1.11003	-1.38291	0.89742	0.62454	-0.27288
chr11	115699581	115699590	-	chr11	115699185	115699812	transcript	Grb2	0.67949	0.45642	0.21748	0.27165	1.37512	0.77746	0.76242	0.49066	1.31155	1.0804	-0.92528	-0.172	-0.14689	0.82089	0.58974	-1.41594	-0.66266	-0.63755	-0.23115	-2.23683	-1.48355	-1.45844	-2.00568	-1.2524	-1.22729	0.75328	0.77839	0.02511
chr5	138227559	138227568	+	chr5	138227351	138227770	5UTR	Nxpe5	0.22167	0.12854	0.04195	0.10551	0.70741	0.35434	0.34138	0.50387	1.21383	0.66129	-1.34343	-0.50584	-0.46354	0.70996	0.15742	-1.84731	-1.00971	-0.96742	-0.55254	-2.55726	-1.71967	-1.67738	-2.00472	-1.16713	-1.12484	0.83759	0.87989	0.04229
chr3	93506085	93506094	+	chr3	93505905	93506750	NA	NA	0.07861	0.07619	0.05949	0.07846	0.59815	0.15902	0.1798	0.02034	0.16911	0.00125	-2.002	-0.55107	-0.66484	0.14877	-0.01909	-2.02234	-0.57141	-0.68518	-0.16786	-2.17111	-0.72018	-0.83395	-2.00325	-0.55232	-0.66609	1.45093	1.33717	-0.11376
chr2	103606020	103606029	+	chr2	103605676	103606488	exon	8030431J09Rik	0.05367	0.04861	0.02381	0.07453	0.58222	0.19012	0.10299	0.05022	0.3253	-0.19033	-2.19321	-0.94295	-0.41514	0.27508	-0.24054	-2.24342	-0.99317	-0.46535	-0.51562	-2.51851	-1.26825	-0.74043	-2.00288	-0.75263	-0.22481	1.25026	1.77807	0.52782
chr4	155200968	155200977	+	chr4	155200658	155201436	NA	NA	0.37358	0.28585	0.17149	0.20258	1.09508	0.65938	0.56269	0.29961	0.81597	0.65635	-1.34609	-0.68787	-0.48978	0.51636	0.35674	-1.6457	-0.98748	-0.78938	-0.15962	-2.16206	-1.50384	-1.30575	-2.00244	-1.34422	-1.14612	0.65822	0.85632	0.19809
chr4	156067761	156067770	-	chr4	156067255	156067917	exon	Gm52714	0.19829	0.14574	0.05858	0.08603	0.62781	0.17018	0.17524	0.28566	0.93671	0.69839	-1.30348	0.14575	0.1184	0.65105	0.41273	-1.58914	-0.13991	-0.16726	-0.23831	-2.24019	-0.79096	-0.8183	-2.00188	-0.55265	-0.57999	1.44923	1.42189	-0.02735
chr1	160053163	160053172	-	chr1	160052946	160053276	5UTR	4930523C07Rik	0.15096	0.177	0.16167	0.08635	0.62889	0.29392	0.28312	-0.14561	-0.06168	0.44122	-1.56026	-0.66267	-0.62196	0.08393	0.58683	-1.41465	-0.51707	-0.47636	0.5029	-1.49858	-0.601	-0.56029	-2.00148	-1.10389	-1.06318	0.89759	0.9383	0.04071
chr6	82863775	82863784	-	chr6	82863511	82863923	NA	NA	0.0868	0.04713	0.06055	0.05354	0.49738	0.16967	0.13139	0.35681	0.22598	0.29284	-1.70831	-0.54371	-0.31763	-0.13083	-0.06397	-2.06512	-0.90052	-0.67444	0.06686	-1.93429	-0.7697	-0.54362	-2.00115	-0.83655	-0.61047	1.16459	1.39067	0.22608
chr7	105739190	105739199	+	chr7	105739104	105739332	transcript	Ilk	0.35886	0.27205	0.23314	0.16559	0.94561	0.31841	0.33259	0.30684	0.46885	0.80224	-1.19846	0.13491	0.08617	0.16202	0.4954	-1.50529	-0.17193	-0.22067	0.33339	-1.66731	-0.33394	-0.38269	-2.00069	-0.66733	-0.71607	1.33336	1.28462	-0.04874
chr1	181316808	181316817	-	chr1	181316652	181317139	NA	NA	0.16341	0.1393	0.04046	0.05729	0.51209	0.3058	0.23003	0.14174	0.93561	0.76577	-1.23466	-0.63471	-0.33177	0.79387	0.62403	-1.3764	-0.77645	-0.47351	-0.16984	-2.17027	-1.57032	-1.26738	-2.00043	-1.40048	-1.09754	0.59995	0.90289	0.30294
chr16	38406927	38406936	+	chr16	38406762	38407151	CDS	Pla1a	0.18503	0.08279	0.09315	0.049	0.47853	0.17024	0.14913	0.65764	0.57559	0.96318	-1.03627	0.0785	0.1985	-0.08205	0.30554	-1.69391	-0.57914	-0.45914	0.38759	-1.61186	-0.49709	-0.37709	-1.99945	-0.88468	-0.76468	1.11477	1.23477	0.12
chr15	79414822	79414831	-	chr15	79414553	79414952	3UTR	Csnk1e	0.14524	0.11102	0.11102	0.04444	0.46006	0.20781	0.19923	0.22244	0.22244	0.7881	-1.21073	-0.33487	-0.2933	0	0.56566	-1.43317	-0.55731	-0.51574	0.56566	-1.43317	-0.55731	-0.51574	-1.99883	-1.12297	-1.0814	0.87586	0.91743	0.04157
chr4	119812929	119812938	-	chr4	119812732	119813215	exon	Hivep3	0.72439	0.21656	0.31282	0.14511	0.86155	0.77263	0.54434	1.3972	1.00795	1.77405	-0.22348	-0.0826	0.35834	-0.38924	0.37685	-1.62068	-1.4798	-1.03886	0.76609	-1.23143	-1.09056	-0.64961	-1.99753	-1.85665	-1.41571	0.14088	0.58182	0.44094
chr19	8592275	8592284	-	chr19	8592148	8593166	5UTR	Slc22a8	0.43111	0.14121	0.12262	0.08775	0.63223	0.37595	0.34873	1.15782	1.27648	1.52937	-0.46762	0.16003	0.24606	0.11865	0.37154	-1.62544	-0.99779	-0.91176	0.25289	-1.74409	-1.11644	-1.03041	-1.99698	-1.36934	-1.2833	0.62765	0.71368	0.08603
chr14	13361760	13361769	+	chr14	13361648	13362090	NA	NA	0.09574	0.04552	0	0.03677	0.42819	0.19447	0.25075	0.44287	1.01136	0.53614	-1.45934	-0.60375	-0.86067	0.56849	0.09327	-1.90221	-1.04662	-1.30354	-0.47522	-2.4707	-1.61511	-1.87203	-1.99548	-1.13988	-1.39681	0.85559	0.59867	-0.25693
chr12	99789744	99789753	+	chr12	99789573	99790028	NA	NA	0.08676	0.05423	0.04135	0.04323	0.45364	0.19895	0.28827	0.2858	0.41671	0.39685	-1.59782	-0.69582	-1.07947	0.13091	0.11105	-1.88362	-0.98162	-1.36527	-0.01986	-2.01453	-1.11253	-1.49618	-1.99466	-1.09266	-1.47631	0.902	0.51835	-0.38365
chr7	35156588	35156597	+	chr7	35156316	35156953	exon	Gm35889	0.14218	0.17472	0.09563	0.08944	0.63772	0.38265	0.22689	-0.18603	0.31633	0.36414	-1.63037	-1.01227	-0.44179	0.50236	0.55017	-1.44434	-0.82624	-0.25576	0.04781	-1.9467	-1.3286	-0.75811	-1.99451	-1.37641	-0.80593	0.6181	1.18858	0.57048
chr6	52842780	52842789	-	chr6	52842653	52842966	NA	NA	0.10869	0.05214	0.03405	0.05816	0.51287	0.13922	0.14129	0.47124	0.66153	0.4131	-1.58093	-0.20218	-0.21492	0.1903	-0.05814	-2.05216	-0.67342	-0.68616	-0.24844	-2.24246	-0.86372	-0.87645	-1.99402	-0.61528	-0.62801	1.37874	1.36601	-0.01273
chr6	52842796	52842805	-	chr6	52842653	52842966	NA	NA	0.1335	0.05034	0.03367	0.05816	0.51287	0.13922	0.11644	0.65548	0.83221	0.57949	-1.41453	-0.03579	0.11233	0.17673	-0.07599	-2.07001	-0.69127	-0.54315	-0.25272	-2.24674	-0.868	-0.71988	-1.99402	-0.61528	-0.46716	1.37874	1.52686	0.14812
chr7	29492126	29492135	+	chr7	29491527	29492293	NA	NA	0.09743	0.06584	0.0737	0.04057	0.4427	0.23006	0.17359	0.25982	0.19067	0.50767	-1.48609	-0.75867	-0.48267	-0.06915	0.24785	-1.7459	-1.01849	-0.74249	0.317	-1.67676	-0.94934	-0.67334	-1.99375	-1.26634	-0.99034	0.72741	1.00342	0.276
chr4	135069972	135069981	-	chr4	135069849	135070284	NA	NA	0.2739	0.13181	0.15095	0.10745	0.70815	0.25375	0.23906	0.70359	0.58633	0.86808	-1.12403	0.08121	0.14343	-0.11725	0.16449	-1.82762	-0.62238	-0.56016	0.28175	-1.71036	-0.50513	-0.44291	-1.99211	-0.78688	-0.72465	1.20523	1.26746	0.06222
chr1	171849653	171849662	-	chr1	171849450	171849822	transcript	Cd84	0.16823	0.13157	0.0502	0.10818	0.71047	0.26857	0.29462	0.21703	0.86164	0.37478	-1.61628	-0.46705	-0.56708	0.6446	0.15775	-1.83331	-0.68408	-0.78411	-0.48685	-2.47792	-1.32868	-1.42872	-1.99106	-0.84183	-0.94186	1.14923	1.0492	-0.10003
chr7	139412630	139412639	+	chr7	139412405	139412823	5UTR	Inpp5a	0.11365	0.10803	0.04482	0.06497	0.53857	0.21803	0.12051	0.03954	0.58008	0.38487	-1.60591	-0.58695	-0.04684	0.54054	0.34533	-1.64544	-0.62649	-0.08637	-0.19521	-2.18598	-1.16703	-0.62691	-1.99077	-0.97182	-0.4317	1.01896	1.55907	0.54011
chr12	101005858	101005867	-	chr12	101005741	101005981	transcript	Gm36756	0.13658	0.10462	0.09655	0.05683	0.50614	0.2171	0.33697	0.21501	0.27477	0.61152	-1.37907	-0.43171	-0.90159	0.05976	0.39651	-1.59407	-0.64671	-1.1166	0.33675	-1.65384	-0.70648	-1.17636	-1.99059	-1.04322	-1.51311	0.94736	0.47748	-0.46989
chr11	53795443	53795452	+	chr11	53794381	53795535	NA	NA	0.48154	0.38374	0.20701	0.17651	0.98159	0.60939	0.46382	0.26856	0.93453	1.08853	-0.90185	-0.28929	0.0451	0.66597	0.81997	-1.17041	-0.55786	-0.22347	0.15399	-1.83638	-1.22383	-0.88944	-1.99038	-1.37782	-1.04343	0.61255	0.94695	0.33439
chr5	66112350	66112359	-	chr5	66112029	66112494	NA	NA	0.14358	0.14583	0.07208	0.11021	0.71792	0.30171	0.24865	-0.01358	0.51588	0.21811	-1.77185	-0.73542	-0.52786	0.52947	0.2317	-1.75827	-0.72184	-0.51427	-0.29777	-2.28773	-1.25131	-1.04374	-1.98996	-0.95354	-0.74597	1.03643	1.24399	0.20757
chr10	37337508	37337517	-	chr10	37337139	37337638	exon	Gm26535	0.20476	0.23951	0.14611	0.04506	0.45889	0.25757	0.2351	-0.15862	0.315	1.10189	-0.88745	-0.23464	-0.13943	0.47361	1.26051	-0.72883	-0.07603	0.01919	0.7869	-1.20245	-0.54964	-0.45442	-1.98935	-1.33654	-1.24132	0.65281	0.74802	0.09522
chr4	117126267	117126276	+	chr4	117125980	117126371	transcript	Tctex1d4	0.55483	0.45057	0.55263	0.23988	1.23192	0.87949	0.58281	0.25262	0.0049	0.95799	-1.0308	-0.58514	-0.06089	-0.24772	0.70537	-1.28341	-0.83776	-0.3135	0.95309	-1.0357	-0.59004	-0.06579	-1.98878	-1.54313	-1.01887	0.44566	0.96991	0.52425
chr4	8837694	8837703	+	chr4	8837467	8837854	CDS	Chd7	0.06409	0.07613	0.04401	0.00032	0.28106	0.19007	0.15532	-0.10573	0.19564	0.74357	-1.24506	-0.84449	-0.65642	0.30137	0.8493	-1.13933	-0.73876	-0.55069	0.54793	-1.4407	-1.04013	-0.85206	-1.98863	-1.58806	-1.39999	0.40057	0.58864	0.18807
chr13	23911458	23911467	+	chr13	23911401	23911645	5UTR	Slc17a4	0.19304	0.13435	0.05648	0.03967	0.43713	0.19232	0.1767	0.32968	0.93054	1.10114	-0.88724	0.00362	0.08448	0.60086	0.77145	-1.21692	-0.32606	-0.2452	0.1706	-1.81778	-0.92692	-0.84606	-1.98837	-1.09752	-1.01666	0.89086	0.97172	0.08086
chr5	149265038	149265047	-	chr5	149264856	149265223	5UTR	Alox5ap	0.20882	0.21029	0.10674	0.11261	0.7262	0.48491	0.16778	-0.00698	0.59253	0.551	-1.43676	-0.93431	0.20992	0.59951	0.55798	-1.42978	-0.92733	0.2169	-0.04153	-2.02929	-1.52684	-0.38261	-1.98776	-1.48531	-0.34108	0.50245	1.64668	1.14423
chr1	194995435	194995444	+	chr1	194995259	194995532	exon	Gm32250	0.08625	0.11657	0.07532	0.02349	0.37249	0.10488	0.10422	-0.22401	0.09012	0.61639	-1.37062	-0.14171	-0.13692	0.31413	0.84041	-1.14661	0.0823	0.08709	0.52628	-1.46074	-0.23183	-0.22704	-1.98701	-0.75811	-0.75332	1.22891	1.2337	0.00479
chr3	122521060	122521069	-	chr3	122520864	122521620	transcript	Bcar3	0.211	0.19248	0.13782	0.0912	0.64083	0.20781	0.21502	0.0903	0.39543	0.71896	-1.26791	0.01516	-0.01888	0.30513	0.62866	-1.35821	-0.07514	-0.10917	0.32353	-1.66334	-0.38028	-0.41431	-1.98687	-0.7038	-0.73784	1.28307	1.24903	-0.03403
chr17	26168218	26168227	-	chr17	26167966	26168550	transcript	Axin1	0.11289	0.13326	0.08035	0.08246	0.60561	0.17432	0.23212	-0.13532	0.24655	0.22922	-1.75646	-0.37469	-0.6559	0.38188	0.36455	-1.62114	-0.23937	-0.52058	-0.01733	-2.00301	-0.62124	-0.90245	-1.98568	-0.60391	-0.88512	1.38177	1.10056	-0.28121
chr18	82867542	82867551	+	chr18	82867433	82868082	transcript	4930445N18Rik	0.10147	0.13443	0.07749	0.06058	0.51868	0.22477	0.20883	-0.22454	0.18857	0.33811	-1.64693	-0.70486	-0.63091	0.4131	0.56265	-1.42239	-0.48032	-0.40637	0.14954	-1.8355	-0.89342	-0.81947	-1.98504	-1.04296	-0.96901	0.94208	1.01602	0.07395
chr10	128902583	128902592	-	chr10	128902259	128902815	5UTR	Cd63	0.24992	0.25044	0.11368	0.09666	0.66134	0.28909	0.4165	-0.00218	0.72702	0.85023	-1.13448	-0.1555	-0.5695	0.7292	0.85241	-1.1323	-0.15333	-0.56732	0.12321	-1.86151	-0.88253	-1.29652	-1.98471	-1.00573	-1.41972	0.97898	0.56499	-0.41399
chr9	65541825	65541834	-	chr9	65541245	65542599	NA	NA	0.64086	0.50399	0.46903	0.38671	1.80828	0.84749	0.78522	0.29724	0.38411	0.61204	-1.37189	-0.35737	-0.25867	0.08687	0.31481	-1.66912	-0.6546	-0.55591	0.22794	-1.756	-0.74148	-0.64278	-1.98393	-0.96941	-0.87072	1.01452	1.11321	0.09869
chr5	134258574	134258583	-	chr5	134258437	134258828	CDS	Gtf2i	0.07371	0.08907	0.04676	0.02097	0.36139	0.14718	0.10761	-0.12625	0.25232	0.54373	-1.43978	-0.52349	-0.26524	0.37857	0.66997	-1.31353	-0.39724	-0.13899	0.29141	-1.6921	-0.77581	-0.51756	-1.9835	-1.06721	-0.80896	0.91629	1.17454	0.25825
chr14	67884857	67884866	+	chr14	67884678	67885270	NA	NA	0.1399	0.02468	0.0162	0.04512	0.45633	0.15079	0.15754	0.97732	1.08404	0.74851	-1.23352	-0.06558	-0.10479	0.10672	-0.22881	-2.21084	-1.0429	-1.08211	-0.33553	-2.31756	-1.14962	-1.18883	-1.98203	-0.8141	-0.8533	1.16793	1.12873	-0.0392
chr7	101362929	101362938	-	chr7	101362722	101363259	5UTR	Arap1	0.15669	0.09753	0.03484	0.08787	0.625	0.22399	0.39566	0.38789	0.95897	0.46245	-1.51915	-0.34277	-0.96517	0.57108	0.07456	-1.90704	-0.73066	-1.35306	-0.49651	-2.47812	-1.30174	-1.92414	-1.9816	-0.80523	-1.42763	1.17638	0.55398	-0.6224
chr16	32107833	32107842	-	chr16	32107289	32108502	transcript	Cep19	0.41426	0.56434	0.38946	0.15036	0.87099	0.46027	0.52913	-0.3731	0.07213	1.05579	-0.92461	-0.12496	-0.29384	0.44524	1.4289	-0.55151	0.24814	0.07927	0.98366	-0.99675	-0.1971	-0.36597	-1.9804	-1.18076	-1.34963	0.79965	0.63078	-0.16887
chr4	126019186	126019195	-	chr4	126018898	126019400	exon	Gm32908	0.08526	0.02381	0.02913	0.0241	0.37272	0.11341	0.16387	0.60454	0.54096	0.601	-1.37927	-0.21016	-0.52398	-0.06359	-0.00354	-1.98381	-0.8147	-1.12852	0.06005	-1.92022	-0.75111	-1.06493	-1.98027	-0.81116	-1.12498	1.16911	0.85529	-0.31382
chr10	80105711	80105720	-	chr10	80105392	80105814	5UTR	Sbno2	0.11704	0.08615	0.06746	0.10261	0.68175	0.24619	0.35071	0.22803	0.38582	0.10205	-1.87683	-0.68818	-1.07445	0.15779	-0.12597	-2.10486	-0.9162	-1.30248	-0.28376	-2.26265	-1.07399	-1.46027	-1.97889	-0.79023	-1.17651	1.18866	0.80238	-0.38628
chr5	140739991	140740000	-	chr5	140739819	140740149	transcript	Amz1	0.06477	0.12585	0.08053	0.06989	0.55265	0.22034	0.2093	-0.46895	-0.13633	-0.04572	-2.02433	-0.98426	-0.93273	0.33262	0.42323	-1.55538	-0.51531	-0.46378	0.09061	-1.888	-0.84793	-0.79639	-1.97862	-0.93855	-0.88701	1.04007	1.09161	0.05154
chr13	30198213	30198222	-	chr13	30197928	30198588	CDS	Mboat1	0.14069	0.10374	0.04175	0.03218	0.40377	0.22288	0.13255	0.24686	0.78869	0.89395	-1.08391	-0.43278	0.05087	0.54182	0.64709	-1.33078	-0.67965	-0.19599	0.10527	-1.8726	-1.22147	-0.73781	-1.97786	-1.32674	-0.84308	0.65113	1.13478	0.48365
chr10	118419082	118419091	-	chr10	118418845	118419515	NA	NA	0.35706	0.20833	0.11467	0.12269	0.76017	0.3583	0.18063	0.5768	1.11117	1.05682	-0.92083	-0.00396	0.71532	0.53437	0.48002	-1.49763	-0.58076	0.13851	-0.05435	-2.03199	-1.11513	-0.39585	-1.97765	-1.06078	-0.34151	0.91687	1.63614	0.71928
chr10	98725326	98725335	-	chr10	98725193	98725475	NA	NA	0.1441	0.06077	0.07137	0.03877	0.42923	0.17282	0.13112	0.62063	0.5252	0.84144	-1.13505	-0.16414	0.08079	-0.09542	0.22081	-1.75568	-0.78476	-0.53984	0.31623	-1.66026	-0.68934	-0.44442	-1.97649	-1.00557	-0.76065	0.97092	1.21584	0.24492
chr2	153215046	153215055	+	chr2	153214667	153215736	transcript	Tm9sf4	0.29598	0.13173	0.203	0.12065	0.75099	0.18784	0.25653	0.78813	0.39265	0.86066	-1.11504	0.46817	0.15376	-0.39548	0.07253	-1.90317	-0.31996	-0.63437	0.46801	-1.50768	0.07552	-0.23889	-1.9757	-0.39249	-0.7069	1.58321	1.26879	-0.31441
chr14	60736714	60736723	-	chr14	60736045	60737185	transcript	Spata13	0.33154	0.2315	0.25454	0.20881	1.09771	0.5441	0.44082	0.38638	0.28778	0.49054	-1.48512	-0.58421	-0.32959	-0.09859	0.10416	-1.8715	-0.97058	-0.71596	0.20276	-1.77291	-0.87199	-0.61737	-1.97566	-1.07474	-0.82012	0.90092	1.15554	0.25462
chr12	79646847	79646856	+	chr12	79646201	79647667	NA	NA	0.14503	0.15965	0.09471	0.08712	0.61903	0.27368	0.27256	-0.08556	0.34062	0.39976	-1.57577	-0.62073	-0.61633	0.42618	0.48532	-1.49021	-0.53517	-0.53077	0.05915	-1.91639	-0.96135	-0.95695	-1.97553	-1.0205	-1.0161	0.95504	0.95944	0.0044
chr11	89024287	89024296	+	chr11	89024143	89024583	transcript	Trim25	0.19697	0.12743	0.14373	0.12239	0.75731	0.43704	0.26439	0.39363	0.29127	0.42681	-1.548	-0.86739	-0.30043	-0.10236	0.03318	-1.94163	-1.26102	-0.69406	0.13554	-1.83927	-1.15866	-0.5917	-1.97481	-1.2942	-0.72724	0.68061	1.24757	0.56696
chr13	99939524	99939533	+	chr13	99939011	99939708	3UTR	Mccc2	0.083	0.05873	0.0712	0.04122	0.43816	0.1998	0.15244	0.21244	0.09939	0.38781	-1.58675	-0.73028	-0.47691	-0.11305	0.17537	-1.79919	-0.94272	-0.68936	0.28842	-1.68614	-0.82967	-0.5763	-1.97456	-1.11809	-0.86473	0.85648	1.10984	0.25336
chr11	119925465	119925474	-	chr11	119925182	119925606	transcript	Chmp6	0.14457	0.16327	0.10245	0.10501	0.68883	0.2401	0.41479	-0.10876	0.27993	0.26127	-1.71324	-0.48544	-1.09186	0.38869	0.37003	-1.60448	-0.37667	-0.98309	-0.01866	-1.99316	-0.76536	-1.37178	-1.97451	-0.74671	-1.35313	1.2278	0.62138	-0.60642
chr8	25745178	25745187	+	chr8	25745022	25745351	transcript	Ddhd2	0.18446	0.14799	0.10927	0.08107	0.59436	0.38526	0.20984	0.20233	0.45359	0.66877	-1.30492	-0.7828	-0.12573	0.25127	0.46645	-1.50725	-0.98512	-0.32806	0.21518	-1.75852	-1.23639	-0.57933	-1.9737	-1.45157	-0.79451	0.52213	1.17919	0.65706
chr11	73093058	73093067	-	chr11	73092888	73093322	exon	Itgae	0.11125	0.04348	0.05106	0.02025	0.35547	0.15036	0.1865	0.5773	0.5	0.84379	-1.12989	-0.25134	-0.45015	-0.07729	0.2665	-1.70718	-0.82864	-1.02744	0.34379	-1.62989	-0.75135	-0.95015	-1.97368	-1.09514	-1.29394	0.87854	0.67974	-0.1988
chr13	51401344	51401353	+	chr13	51401120	51401536	NA	NA	0.15115	0.17184	0.05466	0.04315	0.44516	0.27153	0.16377	-0.11678	0.72069	0.83675	-1.13625	-0.57584	-0.07235	0.83747	0.95353	-1.01947	-0.45906	0.04443	0.11606	-1.85694	-1.29654	-0.79304	-1.973	-1.41259	-0.9091	0.56041	1.0639	0.50349
chr9	70260503	70260512	+	chr9	70260295	70260690	exon	Myo1e	0.08302	0.06339	0.01529	0.01082	0.31823	0.20936	0.16204	0.16931	0.69449	0.7546	-1.21838	-0.77627	-0.53183	0.52518	0.58528	-1.38769	-0.94559	-0.70114	0.06011	-1.91287	-1.47076	-1.22632	-1.97297	-1.53087	-1.28643	0.4421	0.68655	0.24444
chr3	79237849	79237858	-	chr3	79237656	79238012	transcript	4921511C10Rik	0.24931	0.31234	0.16716	0.17255	0.95173	0.48973	0.48388	-0.24301	0.39425	0.3648	-1.60622	-0.76536	-0.75083	0.63726	0.60782	-1.36321	-0.52234	-0.50782	-0.02944	-2.00047	-1.1596	-1.14508	-1.97102	-1.13016	-1.11564	0.84086	0.85539	0.01453
chr19	53464894	53464903	-	chr19	53464562	53465150	transcript	Mirt1	0.20593	0.09888	0.16209	0.09713	0.6558	0.25144	0.26374	0.63626	0.22777	0.64939	-1.32116	-0.20365	-0.25409	-0.40849	0.01313	-1.95741	-0.83991	-0.89035	0.42162	-1.54893	-0.43142	-0.48186	-1.97055	-0.85304	-0.90348	1.11751	1.06707	-0.05044
chr6	144818168	144818177	-	chr6	144818007	144818436	exon	Gm20124	0.15697	0.09389	0.02708	0.08043	0.59025	0.18104	0.27727	0.41714	1.05002	0.52424	-1.4461	-0.132	-0.56449	0.63287	0.10709	-1.86324	-0.54915	-0.98163	-0.52578	-2.49611	-1.18202	-1.6145	-1.97034	-0.65624	-1.08873	1.3141	0.88161	-0.43249
chr18	65600081	65600090	+	chr18	65599788	65600289	NA	NA	0.05869	0.07692	0.02505	0.0358	0.41534	0.14101	0.13239	-0.16246	0.35837	0.2339	-1.73637	-0.62129	-0.56744	0.52084	0.39636	-1.57391	-0.45883	-0.40497	-0.12447	-2.09474	-0.97966	-0.92581	-1.97027	-0.85519	-0.80134	1.11508	1.16893	0.05385
chr12	55389921	55389930	-	chr12	55389734	55390103	exon	Psma6	0.23089	0.17927	0.09655	0.06607	0.53359	0.21119	0.25935	0.24941	0.769	1.02011	-0.94934	0.09017	-0.12106	0.51959	0.77069	-1.19875	-0.15924	-0.37047	0.25111	-1.71834	-0.67883	-0.89006	-1.96944	-0.92993	-1.14116	1.03951	0.82828	-0.21123
chr17	87405830	87405839	-	chr17	87405594	87406053	transcript	Stpg4	0.12408	0.0719	0.03845	0.026	0.37662	0.27457	0.21181	0.39402	0.71834	0.86047	-1.10882	-0.75641	-0.4873	0.32432	0.46645	-1.50284	-1.15043	-0.88133	0.14213	-1.82716	-1.47475	-1.20565	-1.96929	-1.61688	-1.34778	0.35241	0.62151	0.2691
chr11	103310148	103310157	+	chr11	103310041	103310246	NA	NA	0.0576	0.0924	0.01872	0	0.27418	0.10711	0.10994	-0.29769	0.42671	0.68808	-1.27874	-0.40713	-0.42727	0.7244	0.98577	-0.98106	-0.10944	-0.12958	0.26138	-1.70545	-0.83384	-0.85397	-1.96683	-1.09521	-1.11535	0.87161	0.85148	-0.02014
chr1	155223189	155223198	+	chr1	155223039	155224554	exon	BC034090	0.32721	0.18696	0.18796	0.16444	0.91678	0.42343	0.39424	0.58375	0.57863	0.70417	-1.26236	-0.29666	-0.21293	-0.00512	0.12042	-1.84611	-0.88041	-0.79668	0.12554	-1.84098	-0.87529	-0.79156	-1.96653	-1.00084	-0.9171	0.96569	1.04942	0.08373
chr6	38938683	38938692	-	chr6	38938461	38938782	exon	Gm33767	0.05733	0.07921	0.0574	0.02065	0.35457	0.14887	0.23733	-0.19452	-0.00067	0.3997	-1.56606	-0.68159	-1.12928	0.19386	0.59422	-1.37153	-0.48707	-0.93475	0.40037	-1.56539	-0.68092	-1.12861	-1.96576	-1.08129	-1.52898	0.88447	0.43678	-0.44769
chr17	28294692	28294701	+	chr17	28294465	28294890	CDS	Ppard	0.11793	0.2117	0.13985	0.06333	0.52123	0.20623	0.16929	-0.52801	-0.14184	0.4292	-1.53642	-0.50198	-0.31273	0.38617	0.95721	-1.00842	0.02603	0.21527	0.57104	-1.39459	-0.36014	-0.1709	-1.96563	-0.93118	-0.74194	1.03444	1.22369	0.18925
chr7	144444949	144444958	+	chr7	144444810	144445130	CDS	Cttn	0.21865	0.3289	0.09594	0.06442	0.52543	0.37877	0.26472	-0.43547	0.71826	0.97967	-0.98582	-0.5962	-0.19816	1.15373	1.41514	-0.55035	-0.16073	0.23731	0.26141	-1.70408	-1.31446	-0.91642	-1.96549	-1.57587	-1.17783	0.38962	0.78766	0.39804
chr3	109311633	109311642	-	chr3	109311313	109311814	NA	NA	0.35341	0.23859	0.04838	0.07283	0.55733	0.33654	0.20268	0.42757	1.65013	1.42186	-0.54154	0.05542	0.59228	1.22255	0.99429	-0.96911	-0.37216	0.16471	-0.22826	-2.19166	-1.59471	-1.05785	-1.9634	-1.36645	-0.82958	0.59696	1.13382	0.53686
chr12	102368239	102368248	+	chr12	102367747	102368441	5UTR	Rin3	0.22972	0.15501	0.05086	0.08908	0.62031	0.27268	0.35426	0.37821	1.15871	0.82142	-1.14119	-0.17964	-0.46928	0.7805	0.44321	-1.5194	-0.55785	-0.84749	-0.3373	-2.29991	-1.33836	-1.62799	-1.96261	-1.00106	-1.2907	0.96155	0.67192	-0.28964
chr12	112895144	112895153	-	chr12	112895036	112895490	NA	NA	0.081	0.04325	0.06174	0.05628	0.49238	0.15521	0.11057	0.34998	0.16796	0.21936	-1.74304	-0.50939	-0.22494	-0.18202	-0.13062	-2.09302	-0.85938	-0.57492	0.0514	-1.911	-0.67735	-0.3929	-1.9624	-0.72876	-0.44431	1.23364	1.51809	0.28445
chr4	132606010	132606019	+	chr4	132605729	132606177	NA	NA	0.05133	0.02234	0.06164	0.02074	0.35332	0.12449	0.19384	0.32037	-0.09872	0.3403	-1.6203	-0.5874	-0.98471	-0.41908	0.01994	-1.94067	-0.90777	-1.30508	0.43902	-1.52158	-0.48869	-0.88599	-1.9606	-0.92771	-1.32501	1.0329	0.63559	-0.3973
chr8	72281774	72281783	-	chr8	72281606	72282054	transcript	Gm51537	0.12681	0.11967	0.11335	0.07063	0.54747	0.15485	0.13813	0.04737	0.09063	0.42302	-1.53751	-0.17229	-0.07205	0.04326	0.37565	-1.58487	-0.21965	-0.11941	0.33239	-1.62814	-0.26292	-0.16268	-1.96053	-0.59531	-0.49507	1.36522	1.46546	0.10024
chr7	116530030	116530039	-	chr7	116529903	116530132	CDS	Nucb2	0.06249	0.00769	0	0.05851	0.49956	0.15766	0.24437	0.62065	0.73381	0.03711	-1.92163	-0.68453	-1.11129	0.11316	-0.58355	-2.54228	-1.30519	-1.73195	-0.6967	-2.65544	-1.41834	-1.8451	-1.95873	-0.72164	-1.1484	1.23709	0.81033	-0.42676
chr8	120564028	120564037	-	chr8	120563569	120564842	CDS	Gse1	0.93418	0.89309	0.63456	0.389	1.78394	1.02314	1.16097	0.05882	0.49683	1.0896	-0.8689	-0.11969	-0.2875	0.438	1.03078	-0.92772	-0.17851	-0.34632	0.59277	-1.36573	-0.61652	-0.78433	-1.9585	-1.20929	-1.3771	0.74921	0.5814	-0.16781
chr15	102311660	102311669	+	chr15	102311556	102311884	CDS	Espl1	0.13514	0.14492	0.05547	0.02149	0.3555	0.25414	0.19873	-0.06023	0.61554	0.98691	-0.97132	-0.6029	-0.353	0.67577	1.04715	-0.91109	-0.54267	-0.29277	0.37138	-1.58686	-1.21844	-0.96854	-1.95824	-1.58982	-1.33991	0.36842	0.61832	0.2499
chr13	29431154	29431163	-	chr13	29430892	29431289	NA	NA	0.13371	0.10679	0.05874	0.04457	0.44479	0.27358	0.28353	0.1813	0.57534	0.71557	-1.24161	-0.69026	-0.72877	0.39405	0.53427	-1.42291	-0.87156	-0.91006	0.14022	-1.81695	-1.2656	-1.30411	-1.95718	-1.40582	-1.44433	0.55135	0.51285	-0.03851
chr17	35689009	35689018	+	chr17	35688687	35689162	CDS	Ddr1	0.11036	0.08775	0.13678	0.06487	0.52338	0.15502	0.20283	0.16894	-0.1752	0.36276	-1.59387	-0.28483	-0.53797	-0.34414	0.19382	-1.7628	-0.45377	-0.70691	0.53797	-1.41866	-0.10963	-0.36277	-1.95663	-0.64759	-0.90074	1.30903	1.05589	-0.25314
chr4	53353623	53353632	+	chr4	53353398	53353907	NA	NA	0.03802	0.05604	0.03565	0.01207	0.3182	0.09343	0.07695	-0.18426	0.02608	0.31507	-1.64073	-0.50479	-0.3722	0.21035	0.49934	-1.45647	-0.32053	-0.18793	0.28899	-1.66682	-0.53087	-0.39828	-1.95581	-0.81986	-0.68727	1.13594	1.26854	0.13259
chr2	72170714	72170723	-	chr2	72170350	72170927	NA	NA	0.40117	0.22017	0.25056	0.14281	0.8252	0.52341	0.38756	0.65596	0.52285	1.0634	-0.89212	-0.31816	0.04019	-0.13311	0.40744	-1.54808	-0.97412	-0.61577	0.54055	-1.41497	-0.84101	-0.48266	-1.95552	-1.38156	-1.02321	0.57396	0.93231	0.35835
chr18	74876756	74876765	-	chr18	74876517	74876866	NA	NA	0.09507	0.04036	0.03378	0.03571	0.40944	0.11776	0.094	0.49204	0.56434	0.54276	-1.41171	-0.16331	0.00818	0.0723	0.05072	-1.90375	-0.65535	-0.48386	-0.02159	-1.97605	-0.72765	-0.55617	-1.95447	-0.70606	-0.53458	1.2484	1.41989	0.17148
chr8	72169448	72169457	-	chr8	72168951	72169693	CDS	Rab8a	0.08685	0.07731	0.05644	0.04447	0.4429	0.24505	0.23702	0.07807	0.2652	0.38461	-1.56854	-0.90577	-0.87122	0.18713	0.30654	-1.64661	-0.98385	-0.94929	0.11941	-1.83374	-1.17098	-1.13642	-1.95315	-1.29039	-1.25583	0.66276	0.69732	0.03455
chr2	125791532	125791541	-	chr2	125791393	125791965	NA	NA	0.10461	0.10358	0.09424	0.06019	0.5034	0.24427	0.19793	0.00749	0.07727	0.36471	-1.58755	-0.76749	-0.5551	0.06977	0.35721	-1.59504	-0.77498	-0.5626	0.28744	-1.66481	-0.84475	-0.63237	-1.95225	-1.13219	-0.91981	0.82006	1.03244	0.21238
chr6	137697000	137697009	-	chr6	137696367	137697353	NA	NA	0.08216	0.04819	0.0477	0.04204	0.433	0.24424	0.19972	0.30858	0.31355	0.37225	-1.57955	-0.94018	-0.73674	0.00497	0.06367	-1.88813	-1.24876	-1.04531	0.0587	-1.8931	-1.25373	-1.05029	-1.95181	-1.31243	-1.10899	0.63937	0.84282	0.20344
chr13	52283563	52283572	+	chr13	52283359	52283910	NA	NA	0.38645	0.21435	0.10511	0.09608	0.64195	0.41014	0.27137	0.6394	1.26976	1.33663	-0.61496	-0.0694	0.39479	0.63036	0.69724	-1.25436	-0.7088	-0.24461	0.06687	-1.88472	-1.33916	-0.87497	-1.95159	-1.40604	-0.94184	0.54556	1.00975	0.46419
chr3	67557326	67557335	+	chr3	67557159	67557653	NA	NA	0.11783	0.08281	0.04029	0.05045	0.46523	0.13593	0.18235	0.26037	0.65657	0.55154	-1.39948	-0.11815	-0.38319	0.3962	0.29117	-1.65985	-0.37852	-0.64356	-0.10503	-2.05605	-0.77473	-1.03977	-1.95102	-0.6697	-0.93474	1.28132	1.01629	-0.26504
chr11	53795380	53795389	-	chr11	53794381	53795535	NA	NA	0.58413	0.43442	0.24625	0.21163	1.0883	0.50176	0.48639	0.35973	0.99444	1.14913	-0.80174	0.18676	0.22445	0.63471	0.7894	-1.16146	-0.17297	-0.13528	0.15469	-1.79617	-0.80768	-0.76999	-1.95086	-0.96237	-0.92468	0.98849	1.02619	0.03769
chr1	37491842	37491851	-	chr1	37491647	37492302	5UTR	Mgat4a	0.19857	0.26619	0.10438	0.1637	0.90269	0.3695	0.26711	-0.29975	0.55993	0.18292	-1.76749	-0.66333	-0.30342	0.85968	0.48267	-1.46775	-0.36359	-0.00368	-0.37701	-2.32742	-1.22326	-0.86335	-1.95042	-0.84626	-0.48635	1.10416	1.46407	0.35991
chr9	60999211	60999220	+	chr9	60998758	60999568	NA	NA	0.0832	0.07295	0.11294	0.08785	0.60928	0.22771	0.22152	0.08584	-0.22354	-0.03732	-1.9872	-0.85947	-0.83146	-0.30938	-0.12316	-2.07304	-0.94531	-0.9173	0.18622	-1.76366	-0.63593	-0.60792	-1.94988	-0.82215	-0.79414	1.12773	1.15574	0.02801
chr6	126849138	126849147	-	chr6	126848456	126849443	CDS	Ndufa9	0.51009	0.36961	0.51953	0.32256	1.51242	0.78741	0.86732	0.38167	-0.02236	0.53597	-1.41064	-0.54486	-0.67003	-0.40403	0.1543	-1.79231	-0.92653	-1.0517	0.55833	-1.38828	-0.5225	-0.64767	-1.94661	-1.08083	-1.206	0.86578	0.74061	-0.12517
chr8	119813093	119813102	+	chr8	119812663	119813525	CDS	Cotl1	0.24141	0.27394	0.12791	0.14728	0.83654	0.80714	0.35873	-0.13345	0.5954	0.4748	-1.47146	-1.42515	-0.43245	0.72885	0.60825	-1.33801	-1.2917	-0.299	-0.1206	-2.06686	-2.02055	-1.02785	-1.94625	-1.89995	-0.90724	0.0463	1.03901	0.9927
chr10	98744407	98744416	-	chr10	98743977	98744533	NA	NA	0.26953	0.1368	0.05482	0.09292	0.62653	0.19482	0.14917	0.65486	1.28708	0.95872	-0.98649	0.33165	0.57962	0.63222	0.30386	-1.64135	-0.32321	-0.07524	-0.32836	-2.27357	-0.95543	-0.70746	-1.94521	-0.62707	-0.3791	1.31814	1.56611	0.24797
chr14	61971324	61971333	-	chr14	61971115	61972054	NA	NA	0.16335	0.15029	0.0468	0.05217	0.46927	0.25623	0.20229	0.07506	0.86893	0.81502	-1.12933	-0.4442	-0.20309	0.79386	0.73996	-1.2044	-0.51926	-0.27816	-0.05391	-1.99826	-1.31313	-1.07202	-1.94435	-1.25922	-1.01811	0.68513	0.92624	0.24111
chr6	52306030	52306039	-	chr6	52305795	52306423	exon	Evx1os	0.27465	0.21883	0.11856	0.06259	0.50911	0.40989	0.32395	0.2367	0.79366	1.23394	-0.70979	-0.45059	-0.18096	0.55697	0.99724	-0.94649	-0.68729	-0.41766	0.44027	-1.50345	-1.24426	-0.97463	-1.94373	-1.68453	-1.4149	0.25919	0.52883	0.26963
chr12	110764709	110764718	-	chr12	110764580	110765022	transcript	Wdr20	0.10059	0.0663	0.03812	0.04429	0.43871	0.15857	0.16638	0.27927	0.55771	0.49199	-1.45174	-0.37582	-0.41971	0.27845	0.21272	-1.731	-0.65509	-0.69898	-0.06573	-2.00945	-0.93353	-0.97743	-1.94372	-0.86781	-0.9117	1.07592	1.03202	-0.04389
chr4	152087955	152087964	+	chr4	152087650	152088092	CDS	Plekhg5	0.17282	0.1245	0.12408	0.11669	0.71626	0.24425	0.25866	0.28793	0.29071	0.34039	-1.60161	-0.34194	-0.40208	0.00277	0.05245	-1.88955	-0.62987	-0.69002	0.04968	-1.89232	-0.63265	-0.69279	-1.942	-0.68232	-0.74247	1.25967	1.19953	-0.06014
chr8	12756927	12756936	+	chr8	12756294	12757968	exon	Atp11a	0.42264	0.18852	0.12797	0.18864	0.99217	0.54333	0.54138	0.87023	1.21787	0.86962	-1.07165	-0.30275	-0.29833	0.34764	-0.00061	-1.94188	-1.17298	-1.16856	-0.34825	-2.28952	-1.52062	-1.5162	-1.94127	-1.17237	-1.16795	0.7689	0.77332	0.00442
chr4	32258353	32258362	-	chr4	32258201	32258507	5UTR	Bach2	0.2428	0.22097	0.18149	0.17608	0.94274	0.37979	0.45089	0.0966	0.28965	0.31824	-1.62137	-0.49205	-0.69366	0.19305	0.22164	-1.71797	-0.58865	-0.79027	0.02859	-1.91102	-0.7817	-0.98332	-1.93961	-0.81029	-1.01191	1.12932	0.9277	-0.20162
chr9	64703128	64703137	+	chr9	64702854	64703255	transcript	Megf11	0.1392	0.17318	0.08201	0.11052	0.69117	0.42379	0.21988	-0.19605	0.40541	0.18911	-1.75035	-1.14995	-0.42825	0.60146	0.38516	-1.5543	-0.9539	-0.2322	-0.2163	-2.15576	-1.55536	-0.83366	-1.93946	-1.33906	-0.61736	0.6004	1.3221	0.7217
chr16	25053058	25053067	+	chr16	25052835	25053333	NA	NA	0.09921	0.12483	0.09392	0.06147	0.50263	0.23478	0.14053	-0.17942	0.04	0.31308	-1.62541	-0.76618	-0.27927	0.21942	0.4925	-1.44598	-0.58676	-0.09985	0.27308	-1.6654	-0.80618	-0.31927	-1.93849	-1.07926	-0.59236	0.85922	1.34613	0.48691
chr12	77537399	77537408	-	chr12	77537115	77537866	NA	NA	0.16968	0.07651	0.04872	0.03453	0.39925	0.17446	0.08894	0.62819	0.88444	1.03525	-0.90289	-0.02589	0.52681	0.25626	0.40706	-1.53108	-0.65408	-0.10137	0.1508	-1.78734	-0.91034	-0.35763	-1.93814	-1.06114	-0.50843	0.877	1.42971	0.55271
chr1	182255290	182255299	+	chr1	182254625	182255556	5UTR	Gm33887	0.16013	0.10655	0.03591	0.0946	0.62918	0.23657	0.28372	0.34123	0.9667	0.42974	-1.50787	-0.37906	-0.57129	0.62547	0.08852	-1.84909	-0.72029	-0.91251	-0.53695	-2.47457	-1.34576	-1.53799	-1.93761	-0.80881	-1.00103	1.12881	0.93658	-0.19223
chr13	45455804	45455813	+	chr13	45454711	45456058	NA	NA	0.97771	0.47516	0.42317	0.25516	1.24292	0.93222	0.98886	0.91271	1.05084	1.61726	-0.31893	0.06256	-0.01493	0.13813	0.70455	-1.23164	-0.85015	-0.92764	0.56641	-1.36978	-0.98828	-1.06577	-1.93619	-1.5547	-1.63219	0.38149	0.304	-0.07749
chr2	26493059	26493068	+	chr2	26492840	26493263	CDS	Notch1	0.2449	0.15303	0.10875	0.07231	0.54265	0.36486	0.15426	0.45578	0.74044	1.02588	-0.90914	-0.43692	0.44862	0.28467	0.5701	-1.36492	-0.89269	-0.00716	0.28544	-1.64959	-1.17736	-0.29182	-1.93502	-1.4628	-0.57726	0.47223	1.35776	0.88554
chr13	53472828	53472837	+	chr13	53472582	53473044	transcript	Msx2	0.17469	0.14596	0.12008	0.00912	0.30055	0.30664	0.1803	0.16299	0.32745	1.37947	-0.55384	-0.57592	-0.02978	0.16446	1.21648	-0.71683	-0.73891	-0.19277	1.05202	-0.88129	-0.90337	-0.35724	-1.9333	-1.95539	-1.40925	-0.02208	0.52405	0.54614
chr8	83573249	83573258	+	chr8	83572900	83573788	CDS	Tecr	0.16705	0.18951	0.12973	0.10688	0.67375	0.22055	0.24179	-0.11896	0.22234	0.37758	-1.5554	-0.26873	-0.36293	0.3413	0.49654	-1.43644	-0.14976	-0.24396	0.15524	-1.77774	-0.49107	-0.58526	-1.93298	-0.64631	-0.7405	1.28667	1.19247	-0.0942
chr7	125555701	125555710	+	chr7	125555423	125556002	5UTR	Il4ra	0.18213	0.23593	0.0954	0.13799	0.79245	0.22448	0.30519	-0.2566	0.54331	0.25104	-1.68179	-0.20568	-0.53133	0.79991	0.50764	-1.42519	0.05092	-0.27473	-0.29228	-2.22511	-0.749	-1.07464	-1.93283	-0.45672	-0.78236	1.47611	1.15047	-0.32564
chr14	20845900	20845909	+	chr14	20845250	20846593	transcript	Plau	0.3712	0.19949	0.11757	0.10475	0.66477	0.24807	0.24043	0.66409	1.13579	1.22586	-0.70551	0.44328	0.47584	0.4717	0.56177	-1.3696	-0.22081	-0.18824	0.09007	-1.8413	-0.69251	-0.65994	-1.93137	-0.78258	-0.75001	1.14879	1.18136	0.03256
chr9	51030364	51030373	-	chr9	51030220	51030506	NA	NA	0.12483	0.10996	0.0558	0.04139	0.42308	0.09275	0.18945	0.1014	0.54601	0.69168	-1.23963	0.22842	-0.37291	0.44461	0.59027	-1.34103	0.12702	-0.47431	0.14566	-1.78564	-0.31759	-0.91892	-1.9313	-0.46326	-1.06458	1.46805	0.86672	-0.60133
chr7	144447303	144447312	-	chr7	144446950	144447740	CDS	Cttn	0.14862	0.08411	0.1122	0.0713	0.53715	0.31678	0.15514	0.44539	0.23439	0.55292	-1.37837	-0.75906	-0.03822	-0.211	0.10753	-1.82376	-1.20445	-0.48361	0.31853	-1.61276	-0.99345	-0.27261	-1.93129	-1.31198	-0.59114	0.61931	1.34015	0.72084
chr14	18665813	18665822	+	chr14	18665314	18665993	CDS	Ube2e2	0.15499	0.10546	0.05844	0.06179	0.50087	0.3772	0.20738	0.31963	0.70693	0.67562	-1.25564	-0.91957	-0.27524	0.3873	0.35599	-1.57527	-1.2392	-0.59487	-0.03131	-1.96258	-1.6265	-0.98217	-1.93126	-1.59519	-0.95086	0.33608	0.9804	0.64432
chr7	128180257	128180266	+	chr7	128180086	128180558	exon	Gm39091	0.08726	0.09511	0.06418	0.04428	0.43401	0.19404	0.17089	-0.06108	0.1962	0.38985	-1.5412	-0.66747	-0.54671	0.25729	0.45093	-1.48012	-0.60639	-0.48562	0.19365	-1.7374	-0.86368	-0.74291	-1.93105	-1.05732	-0.93656	0.87373	0.99449	0.12077
chr13	37658233	37658242	+	chr13	37658043	37658454	exon	AI463229	0.35302	0.22726	0.12841	0.11625	0.70755	0.32627	0.22377	0.47628	1.0063	1.08733	-0.8421	0.08897	0.49203	0.53002	0.61104	-1.31838	-0.38731	0.01575	0.08102	-1.8484	-0.91733	-0.51428	-1.92942	-0.99835	-0.5953	0.93107	1.33412	0.40306
chr12	76537635	76537644	+	chr12	76537418	76537822	5UTR	Plekhg3	0.24363	0.20909	0.10864	0.14717	0.82515	0.35301	0.26474	0.15558	0.73581	0.48497	-1.44418	-0.4046	-0.08743	0.58024	0.32939	-1.59976	-0.56018	-0.24301	-0.25085	-2.17999	-1.14042	-0.82325	-1.92915	-0.88957	-0.5724	1.03958	1.35675	0.31717
chr1	132371135	132371144	-	chr1	132370959	132371156	transcript	Tmcc2	0.11443	0.06923	0.07612	0.05817	0.48541	0.19864	0.17265	0.35218	0.29262	0.45324	-1.47391	-0.48907	-0.35501	-0.05956	0.10106	-1.82609	-0.84124	-0.70719	0.16062	-1.76654	-0.78169	-0.64763	-1.92715	-0.94231	-0.80825	0.98485	1.11891	0.13406
chr2	125456170	125456179	+	chr2	125455982	125456759	NA	NA	0.0883	0.09265	0.05877	0.03317	0.39024	0.08288	0.12003	-0.03397	0.25457	0.5187	-1.40818	0.04348	-0.23121	0.28855	0.55267	-1.3742	0.07746	-0.19723	0.26413	-1.66275	-0.21109	-0.48578	-1.92688	-0.47522	-0.74991	1.45166	1.17697	-0.27469
chr7	3295936	3295945	+	chr7	3295737	3296014	transcript	Myadm	0.16846	0.10718	0.02298	0.04022	0.417	0.22038	0.14221	0.38319	1.16413	0.96619	-0.96056	-0.26019	0.15187	0.78094	0.58299	-1.34375	-0.64338	-0.23132	-0.19794	-2.12469	-1.42431	-1.01225	-1.92674	-1.22637	-0.81431	0.70037	1.11243	0.41206
chr5	141056190	141056199	+	chr5	141055938	141056568	NA	NA	0.0433	0.02381	0.0353	0	0.26305	0.10782	0.06629	0.22044	0.08645	0.54539	-1.37718	-0.5549	-0.22298	-0.13399	0.32496	-1.59762	-0.77533	-0.44341	0.45894	-1.46363	-0.64135	-0.30942	-1.92257	-1.10029	-0.76837	0.82228	1.1542	0.33192
chr2	10166902	10166911	+	chr2	10166289	10167104	CDS	Itih5	0.20118	0.13794	0.11746	0.09286	0.61455	0.38427	0.23622	0.34751	0.48073	0.65893	-1.26256	-0.69576	-0.1617	0.13322	0.31142	-1.61007	-1.04327	-0.50921	0.1782	-1.74329	-1.17649	-0.64243	-1.92149	-1.35469	-0.82063	0.5668	1.10086	0.53406
chr10	66864585	66864594	-	chr10	66864129	66864924	NA	NA	0.25351	0.19558	0.08015	0.07285	0.53807	0.40913	0.28112	0.26289	0.99569	1.05738	-0.86256	-0.53356	-0.11022	0.73281	0.7945	-1.12545	-0.79644	-0.37311	0.06169	-1.85825	-1.52925	-1.10591	-1.91994	-1.59094	-1.1676	0.32901	0.75234	0.42333
chr5	3502732	3502741	+	chr5	3502578	3503571	NA	NA	0.19054	0.13791	0.22217	0.09208	0.61063	0.19316	0.17476	0.29478	-0.15194	0.61204	-1.30748	-0.01321	0.08224	-0.44672	0.31726	-1.60226	-0.30799	-0.21254	0.76398	-1.15554	0.13873	0.23418	-1.91952	-0.62525	-0.5298	1.29427	1.38972	0.09545
chr7	139377572	139377581	-	chr7	139377328	139377769	exon	Gm46004	0.1589	0.15319	0.07456	0.08068	0.56726	0.18449	0.15171	0.03291	0.58459	0.53321	-1.38577	-0.13893	0.04157	0.55168	0.5003	-1.41868	-0.17184	0.00866	-0.05138	-1.97036	-0.72352	-0.54302	-1.91899	-0.67214	-0.49165	1.24684	1.42734	0.1805
chr2	36230401	36230410	+	chr2	36229974	36230831	5UTR	Ptgs1	0.57578	0.22222	0.25029	0.1555	0.85017	0.36013	0.29265	1.08216	0.95955	1.42374	-0.4952	0.56033	0.79226	-0.1226	0.34158	-1.57736	-0.52183	-0.28989	0.46419	-1.45476	-0.39923	-0.16729	-1.91894	-0.86341	-0.63148	1.05553	1.28747	0.23194
chr13	109239490	109239499	-	chr13	109239247	109239608	NA	NA	0.47872	0.33417	0.19101	0.18846	0.97469	0.70033	0.27628	0.41943	1.00618	1.01914	-0.89965	-0.47173	0.62887	0.58675	0.5997	-1.31908	-0.89117	0.20944	0.01295	-1.90583	-1.47792	-0.37731	-1.91879	-1.49087	-0.39027	0.42792	1.52852	1.1006
chr19	44750934	44750943	+	chr19	44750429	44751060	exon	Pax2	0.09891	0.08093	0.06797	0.04452	0.42997	0.14455	0.16003	0.14096	0.25184	0.4771	-1.44038	-0.30601	-0.39662	0.11089	0.33614	-1.58133	-0.44696	-0.53758	0.22526	-1.69222	-0.55785	-0.64847	-1.91748	-0.78311	-0.87372	1.13437	1.04375	-0.09062
chr11	18925088	18925097	-	chr11	18924664	18925361	NA	NA	0.71611	0.70035	0.18071	0.25468	1.22365	0.97944	0.65795	0.02833	1.55934	1.21563	-0.70161	-0.40594	0.10745	1.53101	1.18729	-0.72994	-0.43428	0.07911	-0.34372	-2.26095	-1.96528	-1.45189	-1.91723	-1.62157	-1.10818	0.29566	0.80905	0.51339
chr5	23894443	23894452	-	chr5	23894036	23894665	NA	NA	0.16773	0.14723	0.23973	0.09595	0.62384	0.4761	0.17714	0.11755	-0.35031	0.46194	-1.45471	-1.12239	-0.05091	-0.46786	0.34439	-1.57226	-1.23994	-0.16846	0.81224	-1.1044	-0.77209	0.29939	-1.91665	-1.58433	-0.51285	0.33232	1.4038	1.07148
chr2	30604888	30604897	+	chr2	30604794	30605192	transcript	Cstad	0.09792	0.07702	0.03438	0.04815	0.4429	0.12306	0.23535	0.16611	0.57916	0.43243	-1.48294	-0.17737	-0.77833	0.41305	0.26632	-1.64905	-0.34348	-0.94444	-0.14672	-2.0621	-0.75653	-1.35749	-1.91538	-0.60981	-1.21077	1.30557	0.70461	-0.60096
chr19	53424817	53424826	-	chr19	53424675	53425049	NA	NA	0.21398	0.25392	0.11733	0.12051	0.71561	0.26368	0.22186	-0.17578	0.5428	0.52128	-1.39367	-0.21567	-0.03642	0.71859	0.69707	-1.21788	-0.03989	0.13937	-0.02152	-1.93647	-0.75847	-0.57922	-1.91495	-0.73695	-0.5577	1.178	1.35725	0.17925
chr9	40582197	40582206	+	chr9	40581777	40582308	NA	NA	0.06809	0.09263	0.03097	0.07165	0.53135	0.19061	0.19272	-0.20309	0.37455	-0.0313	-1.94622	-0.81123	-0.82188	0.57765	0.1718	-1.74313	-0.60814	-0.61879	-0.40585	-2.32078	-1.18579	-1.19643	-1.91493	-0.77994	-0.79059	1.13499	1.12434	-0.01065
chr12	111160127	111160136	-	chr12	111159619	111160346	exon	4930595D18Rik	0.67424	0.61424	0.37422	0.34373	1.55696	1.21642	0.89761	0.11728	0.71407	0.81116	-1.10343	-0.77021	-0.36811	0.59679	0.69388	-1.2207	-0.88749	-0.48539	0.09709	-1.8175	-1.48428	-1.08218	-1.91459	-1.58137	-1.17927	0.33322	0.73532	0.4021
chr6	146501601	146501610	-	chr6	146501272	146502803	5UTR	Itpr2	0.63085	0.74582	0.26931	0.27224	1.28709	0.79677	0.746	-0.21233	0.99599	0.98441	-0.92982	-0.29728	-0.21264	1.20832	1.19674	-0.71749	-0.08495	-0.00031	-0.01158	-1.9258	-1.29326	-1.20863	-1.91422	-1.28168	-1.19704	0.63254	0.71718	0.08464
chr11	119955160	119955169	+	chr11	119954985	119955324	NA	NA	0.15513	0.14175	0.08277	0.04581	0.43333	0.15713	0.16744	0.07956	0.49443	0.8323	-1.08104	-0.01152	-0.06951	0.41487	0.75274	-1.1606	-0.09108	-0.14907	0.33787	-1.57548	-0.50596	-0.56395	-1.91334	-0.84382	-0.90181	1.06952	1.01153	-0.05799
chr17	28750829	28750838	-	chr17	28750412	28751102	transcript	Mapk14	0.45716	0.33142	0.16413	0.14202	0.79504	0.26455	0.31717	0.37339	1.09363	1.22269	-0.68953	0.61995	0.42251	0.72024	0.8493	-1.06292	0.24656	0.04912	0.12906	-1.78316	-0.47369	-0.67112	-1.91222	-0.60274	-0.80018	1.30947	1.11204	-0.19743
chr11	59637192	59637201	+	chr11	59636911	59637341	exon	Gm33998	0.24365	0.25372	0.21057	0.11559	0.6951	0.32602	0.23532	-0.04237	0.14864	0.68731	-1.22407	-0.31472	0.03601	0.19101	0.72967	-1.1817	-0.27235	0.07838	0.53867	-1.37271	-0.46336	-0.11263	-1.91138	-1.00203	-0.6513	0.90935	1.26008	0.35073
chr1	53851463	53851472	-	chr1	53850770	53851768	CDS	Hecw2	0.16015	0.06097	0.05919	0.05643	0.47249	0.14574	0.21001	0.71278	0.72942	0.75561	-1.15559	0.08412	-0.25821	0.01664	0.04283	-1.86837	-0.62866	-0.97099	0.02619	-1.88501	-0.6453	-0.98763	-1.9112	-0.67149	-1.01382	1.23971	0.89738	-0.34233
chr4	134097480	134097489	+	chr4	134097033	134097547	transcript	Crybg2	0.05661	0.10413	0.10337	0.02133	0.34029	0.25679	0.19028	-0.39506	-0.38952	0.38432	-1.52628	-1.21843	-0.91537	0.00554	0.77937	-1.13122	-0.82337	-0.52031	0.77384	-1.13676	-0.82891	-0.52585	-1.9106	-1.60274	-1.29969	0.30785	0.61091	0.30305
chr7	132323583	132323592	-	chr7	132323421	132323784	transcript	Chst15	0.06518	0.0482	0.06271	0.01549	0.31815	0.19071	0.11845	0.16247	0.02253	0.53883	-1.37112	-0.83784	-0.4159	-0.13994	0.37637	-1.53359	-1.0003	-0.57836	0.51631	-1.39365	-0.86036	-0.43842	-1.90995	-1.37667	-0.95473	0.53328	0.95522	0.42194
chr3	86894650	86894659	-	chr3	86894502	86894822	NA	NA	0.10754	0.07276	0.05324	0.04233	0.41882	0.13579	0.12531	0.27292	0.45224	0.56311	-1.3463	-0.18903	-0.12176	0.17932	0.29019	-1.61922	-0.46195	-0.39468	0.11087	-1.79854	-0.64127	-0.574	-1.90941	-0.75214	-0.68487	1.15727	1.22454	0.06727
chr11	26640410	26640419	+	chr11	26640233	26640851	NA	NA	0.17356	0.14889	0.07861	0.11536	0.69286	0.13551	0.20126	0.13942	0.63161	0.3535	-1.55536	0.22108	-0.142	0.49218	0.21408	-1.69478	0.08166	-0.28142	-0.2781	-2.18696	-0.41052	-0.7736	-1.90886	-0.13242	-0.4955	1.77644	1.41336	-0.36308
chr3	109255225	109255234	+	chr3	109254984	109255546	NA	NA	0.07113	0.08238	0.0351	0.04041	0.41108	0.19387	0.22426	-0.09495	0.3545	0.29646	-1.61144	-0.80089	-0.94555	0.44945	0.39141	-1.5165	-0.70594	-0.85061	-0.05804	-1.96595	-1.15539	-1.30006	-1.9079	-1.09735	-1.24202	0.81056	0.66589	-0.14467
chr5	66075111	66075120	+	chr5	66074940	66075518	5UTR	Rbm47	0.13769	0.103	0.10567	0.10348	0.64689	0.35086	0.25796	0.23373	0.21433	0.23022	-1.67599	-0.94041	-0.60268	-0.0194	-0.00351	-1.90972	-1.17414	-0.83641	0.01589	-1.89032	-1.15474	-0.81701	-1.90621	-1.17063	-0.8329	0.73558	1.07331	0.33773
chr2	157063558	157063567	+	chr2	157063118	157063796	NA	NA	0.30866	0.2046	0.07493	0.1087	0.66631	0.30234	0.24191	0.43104	1.2519	0.98933	-0.9166	0.02281	0.26131	0.82086	0.5583	-1.34764	-0.40823	-0.16973	-0.26257	-2.1685	-1.22909	-0.99059	-1.90594	-0.96652	-0.72802	0.93941	1.17791	0.2385
chr6	142915690	142915699	-	chr6	142915529	142915861	NA	NA	0.08137	0.04315	0.06812	0.02809	0.3638	0.11602	0.11924	0.35408	0.11317	0.52156	-1.38305	-0.25979	-0.28171	-0.2409	0.16749	-1.73712	-0.61386	-0.63579	0.40839	-1.49622	-0.37296	-0.39488	-1.90461	-0.78135	-0.80327	1.12326	1.10134	-0.02193
chr13	49309240	49309249	-	chr13	49308810	49309483	5UTR	Fgd3	0.28278	0.2294	0.10634	0.14459	0.79987	0.38466	0.34871	0.22024	0.91043	0.65863	-1.24579	-0.34508	-0.2325	0.69018	0.43839	-1.46603	-0.56532	-0.45274	-0.25179	-2.15622	-1.2555	-1.14293	-1.90442	-1.00371	-0.89113	0.90071	1.01329	0.11258
chr10	75326724	75326733	+	chr10	75326228	75326888	5UTR	Adora2a	0.43179	0.34942	0.12785	0.11926	0.70463	0.62312	0.36801	0.24569	1.24396	1.30087	-0.60281	-0.44754	0.18647	0.99828	1.05518	-0.84849	-0.69323	-0.05922	0.05691	-1.84677	-1.69151	-1.0575	-1.90368	-1.74841	-1.1144	0.15526	0.78927	0.63401
chr17	34072327	34072336	-	chr17	34072153	34072429	exon	H2-Pb	0.17864	0.09825	0.06705	0.0337	0.38435	0.15817	0.12884	0.50346	0.75857	1.09274	-0.8105	0.11249	0.29069	0.25511	0.58928	-1.31396	-0.39097	-0.21277	0.33417	-1.56907	-0.64608	-0.46788	-1.90324	-0.98025	-0.80205	0.92299	1.10119	0.1782
chr10	66937353	66937362	-	chr10	66937137	66937503	NA	NA	0.09406	0.05144	0.09909	0.06747	0.51061	0.18181	0.12922	0.37021	-0.03803	0.21961	-1.68349	-0.55187	-0.24697	-0.40824	-0.1506	-2.0537	-0.92208	-0.61718	0.25764	-1.64546	-0.51384	-0.20894	-1.9031	-0.77148	-0.46658	1.13162	1.43652	0.3049
chr13	112398264	112398273	+	chr13	112398153	112398481	NA	NA	0.07346	0.02385	0.01927	0.0246	0.35022	0.1306	0.0903	0.50596	0.56302	0.49683	-1.40612	-0.42299	-0.13804	0.05706	-0.00913	-1.91208	-0.92895	-0.644	-0.0662	-1.96914	-0.98602	-0.70107	-1.90294	-0.91982	-0.63487	0.98312	1.26807	0.28495
chr7	63911116	63911125	-	chr7	63910858	63911136	transcript	Klf13	0.36486	0.20606	0.14159	0.15146	0.82347	0.38571	0.31078	0.61239	0.96103	0.90188	-0.99921	-0.06407	0.18081	0.34864	0.2895	-1.6116	-0.67646	-0.43158	-0.05915	-1.96025	-1.02511	-0.78022	-1.9011	-0.96596	-0.72107	0.93514	1.18003	0.24489
chr7	132323625	132323634	-	chr7	132323421	132323784	transcript	Chst15	0.09088	0.05394	0.05311	0.03855	0.4015	0.21943	0.16372	0.32109	0.32919	0.47928	-1.42107	-0.76075	-0.47866	0.0081	0.15819	-1.74216	-1.08185	-0.79976	0.15009	-1.75027	-1.08995	-0.80786	-1.90036	-1.24004	-0.95795	0.66032	0.94241	0.28209
chr5	8944088	8944097	-	chr5	8943905	8944225	exon	Gm31388	0.1744	0.27018	0.12323	0.1175	0.69616	0.21234	0.18069	-0.43991	0.30485	0.34337	-1.55687	-0.19058	-0.03339	0.74476	0.78328	-1.11696	0.24933	0.40652	0.03852	-1.86172	-0.49543	-0.33823	-1.90024	-0.53395	-0.37675	1.36629	1.52348	0.15719
chr9	53700629	53700638	-	chr9	53700500	53700998	exon	Gm51731	0.08811	0.09938	0.03551	0.0234	0.34476	0.11392	0.09499	-0.08651	0.49094	0.63229	-1.26746	-0.19097	-0.05343	0.57746	0.7188	-1.18095	-0.10446	0.03309	0.14134	-1.75841	-0.68192	-0.54437	-1.89975	-0.82326	-0.68572	1.07649	1.21404	0.13755
chr4	141552668	141552677	+	chr4	141552356	141552886	exon	B330016D10Rik	1.2176	0.89048	0.45799	0.48743	2.07564	1.29901	1.20578	0.4138	1.24824	1.17331	-0.72602	-0.08686	0.01306	0.83443	0.7595	-1.13982	-0.50066	-0.40074	-0.07493	-1.97425	-1.3351	-1.23518	-1.89932	-1.26017	-1.16025	0.63916	0.73908	0.09992
chr9	61349852	61349861	-	chr9	61349721	61350238	transcript	Gm39349	0.07598	0.10745	0.01704	0.04123	0.4108	0.1736	0.16934	-0.24473	0.61316	0.32941	-1.56894	-0.65394	-0.63081	0.85789	0.57413	-1.32422	-0.40921	-0.38608	-0.28376	-2.1821	-1.2671	-1.24397	-1.89835	-0.98335	-0.96022	0.915	0.93813	0.02313
chr14	66223846	66223855	-	chr14	66223512	66224058	5UTR	Ptk2b	0.16792	0.13429	0.10664	0.06057	0.48268	0.24229	0.30164	0.19806	0.3841	0.75991	-1.13789	-0.36028	-0.5946	0.18604	0.56185	-1.33595	-0.55833	-0.79265	0.37581	-1.52199	-0.74437	-0.97869	-1.8978	-1.12019	-1.35451	0.77762	0.5433	-0.23432
chr8	107552403	107552412	-	chr8	107552296	107552589	CDS	Wwp2	0.21264	0.16549	0.09416	0.09353	0.60492	0.18369	0.26487	0.24065	0.70385	0.70868	-1.18792	0.14295	-0.22674	0.46319	0.46802	-1.42858	-0.09771	-0.4674	0.00483	-1.89177	-0.5609	-0.93059	-1.8966	-0.56573	-0.93542	1.33087	0.96118	-0.36969
chr2	35841725	35841734	+	chr2	35841284	35841893	exon	Gm10829	0.16745	0.15756	0.18043	0.09469	0.60913	0.34121	0.24633	0.05558	-0.06984	0.46999	-1.42639	-0.73463	-0.38008	-0.12542	0.41441	-1.48197	-0.7902	-0.43566	0.53982	-1.35655	-0.66479	-0.31024	-1.89638	-1.20461	-0.85007	0.69176	1.04631	0.35455
chr16	21642068	21642077	-	chr16	21641851	21642437	CDS	Vps8	0.13229	0.09229	0.06217	0.04265	0.41485	0.18402	0.20961	0.28028	0.53434	0.72664	-1.16818	-0.29672	-0.42364	0.25406	0.44636	-1.44846	-0.577	-0.70392	0.1923	-1.70252	-0.83106	-0.95798	-1.89483	-1.02336	-1.15028	0.87146	0.74454	-0.12692
chr11	32542789	32542798	+	chr11	32542653	32543371	5UTR	Stk10	0.24347	0.24706	0.11459	0.12481	0.72029	0.35361	0.29688	-0.01526	0.69343	0.6245	-1.27016	-0.40722	-0.21182	0.70868	0.63976	-1.2549	-0.39197	-0.19657	-0.06893	-1.96359	-1.10065	-0.90525	-1.89466	-1.03172	-0.83632	0.86294	1.05834	0.1954
chr19	29431161	29431170	+	chr19	29430971	29431810	exon	Pdcd1lg2	0.34386	0.20477	0.15748	0.11218	0.67244	0.49781	0.2688	0.55105	0.79942	1.08564	-0.80735	-0.43445	0.27112	0.24836	0.53459	-1.3584	-0.9855	-0.27993	0.28622	-1.60677	-1.23387	-0.52829	-1.89299	-1.52009	-0.81452	0.3729	1.07848	0.70558
chr1	181860836	181860845	+	chr1	181860485	181861061	NA	NA	0.67082	0.43082	0.34293	0.27079	1.26014	0.57787	0.94039	0.54308	0.80736	1.06754	-0.82398	0.18687	-0.43547	0.26428	0.52446	-1.36706	-0.35621	-0.97855	0.26017	-1.63134	-0.62049	-1.24283	-1.89152	-0.88066	-1.503	1.01085	0.38851	-0.62234
chr11	51925776	51925785	+	chr11	51925534	51925926	NA	NA	0.27341	0.1687	0.07628	0.10657	0.65046	0.25776	0.40963	0.48358	1.10835	0.87247	-1.01831	0.06276	-0.45471	0.62476	0.38889	-1.50189	-0.42083	-0.93829	-0.23588	-2.12665	-1.04559	-1.56305	-1.89078	-0.80971	-1.32718	1.08106	0.5636	-0.51746
chr1	88433708	88433717	-	chr1	88433526	88433871	transcript	Spp2	0.09707	0.09157	0.02174	0.04274	0.41339	0.14206	0.11471	0.04208	0.72199	0.48192	-1.40782	-0.30469	-0.12724	0.67991	0.43984	-1.4499	-0.34677	-0.16932	-0.24007	-2.12981	-1.02668	-0.84923	-1.88974	-0.78661	-0.60916	1.10313	1.28058	0.17745
chr9	111046350	111046359	+	chr9	111046316	111046611	transcript	Ltf	0.05753	0.06254	0.04222	0.03354	0.37928	0.22775	0.12557	-0.04685	0.1534	0.24821	-1.64147	-1.08508	-0.53434	0.20025	0.29506	-1.59462	-1.03823	-0.48749	0.09481	-1.79487	-1.23848	-0.68774	-1.88968	-1.33329	-0.78255	0.5564	1.10713	0.55074
chr7	19266081	19266090	+	chr7	19265909	19266762	CDS	Vasp	0.15673	0.21615	0.13256	0.18328	0.93278	0.37017	0.25157	-0.30656	0.14609	-0.14507	-2.03283	-0.88786	-0.46245	0.45264	0.16148	-1.72628	-0.5813	-0.15589	-0.29116	-2.17892	-1.03395	-0.60854	-1.88776	-0.74279	-0.31738	1.14498	1.57039	0.42541
chr1	85838275	85838284	-	chr1	85838066	85838391	CDS	Cab39	0.20538	0.16818	0.13302	0.09299	0.59775	0.19809	0.22213	0.19125	0.39877	0.67829	-1.20759	0.03553	-0.07848	0.20753	0.48704	-1.39884	-0.15571	-0.26973	0.27952	-1.60636	-0.36324	-0.47725	-1.88588	-0.64276	-0.75677	1.24312	1.12911	-0.11401
chr2	25706813	25706822	+	chr2	25706536	25707364	start_codon	Bmyc	0.84558	0.49649	0.23688	0.1821	0.92694	0.62688	0.5452	0.66988	1.505	1.7659	-0.11978	0.38214	0.55557	0.83513	1.09603	-0.78966	-0.28774	-0.11431	0.2609	-1.62478	-1.12286	-0.94943	-1.88568	-1.38376	-1.21033	0.50192	0.67535	0.17343
chr3	89911392	89911401	-	chr3	89911133	89911661	CDS	Il6ra	0.10618	0.0239	0.046	0.06496	0.49407	0.1917	0.15783	0.76248	0.5151	0.33217	-1.5535	-0.51266	-0.33078	-0.24738	-0.43031	-2.31598	-1.27514	-1.09326	-0.18293	-2.0686	-1.02776	-0.84588	-1.88567	-0.84483	-0.66295	1.04084	1.22272	0.18188
chr1	191250109	191250118	+	chr1	191249892	191250383	NA	NA	0.12036	0.09329	0.10259	0.06265	0.48534	0.26115	0.21746	0.19452	0.12469	0.45187	-1.43332	-0.72773	-0.53849	-0.06983	0.25735	-1.62783	-0.92225	-0.73301	0.32718	-1.55801	-0.85242	-0.66318	-1.88519	-1.1796	-0.99036	0.70559	0.89483	0.18924
chr4	47746627	47746636	-	chr4	47746133	47747090	NA	NA	0.08471	0.02277	0.01905	0.00927	0.28789	0.11436	0.09457	0.61288	0.65949	0.78973	-1.09446	-0.22117	-0.07737	0.04661	0.17685	-1.70735	-0.83405	-0.69026	0.13024	-1.75395	-0.88066	-0.73686	-1.88419	-1.0109	-0.8671	0.87329	1.01709	0.1438
chr14	55392603	55392612	-	chr14	55392367	55392828	NA	NA	0.99245	0.53991	0.34548	0.31598	1.41992	1.25178	0.77377	0.77703	1.30526	1.40545	-0.47857	-0.30876	0.32415	0.52823	0.62841	-1.25561	-1.08579	-0.45288	0.10018	-1.78384	-1.61402	-0.98111	-1.88402	-1.71421	-1.0813	0.16982	0.80273	0.63291
chr14	122009773	122009782	-	chr14	122009489	122009897	CDS	Ubac2	0.12137	0.14346	0.07458	0.07125	0.51652	0.22932	0.25191	-0.14071	0.35292	0.38166	-1.50214	-0.58559	-0.68295	0.49363	0.52237	-1.36143	-0.44488	-0.54224	0.02874	-1.85506	-0.93851	-1.03587	-1.8838	-0.96725	-1.06461	0.91655	0.81919	-0.09736
chr8	90876621	90876630	+	chr8	90876132	90877551	NA	NA	0.41301	0.18636	0.18466	0.16821	0.8743	0.49549	0.45915	0.85416	0.86293	0.95063	-0.9331	-0.21735	-0.1256	0.00877	0.09647	-1.78726	-1.07151	-0.97976	0.0877	-1.79603	-1.08028	-0.98852	-1.88373	-1.16798	-1.07623	0.71575	0.8075	0.09176
chr3	115902485	115902494	-	chr3	115902161	115902847	CDS	Dph5	0.28455	0.21682	0.06007	0.10218	0.6306	0.42543	0.42255	0.2842	1.29551	0.94742	-0.93625	-0.45619	-0.44817	1.01131	0.66322	-1.22044	-0.74038	-0.73237	-0.34809	-2.23176	-1.7517	-1.74368	-1.88367	-1.40361	-1.39559	0.48006	0.48808	0.00802
chr10	77522185	77522194	+	chr10	77522120	77522736	exon	Gm36040	0.11075	0.08576	0.08448	0.06154	0.48062	0.19588	0.20619	0.18755	0.19784	0.39602	-1.48761	-0.50108	-0.55145	0.0103	0.20847	-1.67516	-0.68862	-0.739	0.19818	-1.68545	-0.69892	-0.7493	-1.88363	-0.8971	-0.94747	0.98654	0.93616	-0.05038
chr3	65484658	65484667	-	chr3	65484336	65484765	transcript	Gm34576	0.1016	0.04553	0.01836	0	0.25314	0.16539	0.11163	0.48659	0.79841	1.05518	-0.82681	-0.40676	-0.07205	0.31182	0.56859	-1.3134	-0.89335	-0.55865	0.25677	-1.62522	-1.20518	-0.87047	-1.88199	-1.46195	-1.12724	0.42004	0.75475	0.33471
chr4	145300456	145300465	+	chr4	145300117	145300735	CDS	Tnfrsf8	0.20032	0.14296	0.15869	0.16604	0.86506	0.33832	0.32338	0.31245	0.21982	0.17849	-1.70339	-0.55432	-0.50361	-0.09263	-0.13396	-2.01583	-0.86677	-0.81606	-0.04132	-1.9232	-0.77414	-0.72343	-1.88188	-0.73281	-0.68211	1.14906	1.19977	0.05071
chr15	86182688	86182697	+	chr15	86182620	86182940	CDS	Cerk	0.28658	0.14172	0.07102	0.08443	0.56381	0.36977	0.33519	0.69054	1.20432	1.09177	-0.78907	-0.28504	-0.17331	0.51378	0.40123	-1.47962	-0.97558	-0.86385	-0.11255	-1.99339	-1.48936	-1.37763	-1.88084	-1.37681	-1.26508	0.50403	0.61576	0.11173
chr5	103746945	103746954	+	chr5	103746619	103747120	NA	NA	0.08878	0.06031	0.04982	0.03611	0.38525	0.19468	0.14502	0.24391	0.34531	0.48958	-1.38945	-0.65864	-0.38656	0.1014	0.24567	-1.63336	-0.90255	-0.63047	0.14427	-1.73476	-1.00395	-0.73187	-1.87903	-1.14822	-0.87614	0.73081	1.00289	0.27208
chr1	170709753	170709762	-	chr1	170709434	170710233	3UTR	Atf6	0.11595	0.15948	0.12174	0.10342	0.63207	0.17431	0.26405	-0.27153	-0.0392	0.08867	-1.78884	-0.35348	-0.76941	0.23233	0.3602	-1.51731	-0.08195	-0.49787	0.12787	-1.74964	-0.31428	-0.7302	-1.87751	-0.44215	-0.85807	1.43536	1.01944	-0.41592
chr3	84715141	84715150	+	chr3	84715025	84715701	NA	NA	0.32288	0.22017	0.17912	0.12488	0.71023	0.34414	0.40386	0.4078	0.60964	0.92871	-0.94756	-0.07172	-0.25597	0.20184	0.52091	-1.35536	-0.47952	-0.66377	0.31907	-1.5572	-0.68136	-0.86561	-1.87627	-1.00043	-1.18468	0.87584	0.69159	-0.18425
chr10	20104734	20104743	+	chr10	20104356	20105340	CDS	Map3k5	0.20956	0.21153	0.14161	0.08784	0.57302	0.35644	0.18824	-0.00932	0.36524	0.73852	-1.1351	-0.56897	0.10497	0.37456	0.74784	-1.12578	-0.55964	0.11429	0.37328	-1.50034	-0.9342	-0.26027	-1.87362	-1.30748	-0.63355	0.56614	1.24007	0.67394
chr2	178665127	178665136	-	chr2	178664969	178665362	exon	Gm35695	0.3842	0.22897	0.13597	0.16914	0.87015	0.46758	0.39454	0.56585	1.05535	0.86117	-1.01126	-0.23177	-0.03085	0.4895	0.29532	-1.57712	-0.79762	-0.5967	-0.19419	-2.06662	-1.28712	-1.0862	-1.87243	-1.09293	-0.89201	0.7795	0.98042	0.20092
chr17	83847968	83847977	-	chr17	83847828	83848128	exon	Haao	0.67033	0.49972	0.24518	0.28059	1.27812	0.51814	0.63141	0.36428	1.17155	1.02839	-0.84393	0.32022	0.07537	0.80728	0.66412	-1.20821	-0.04406	-0.2889	-0.14316	-2.01548	-0.85134	-1.09618	-1.87232	-0.70818	-0.95302	1.16415	0.9193	-0.24484
chr2	180432477	180432486	-	chr2	180432108	180432628	NA	NA	1.00633	0.45241	0.4739	0.3937	1.69132	1.25241	0.80439	1.00955	0.95392	1.17346	-0.69812	-0.29112	0.29245	-0.05563	0.16391	-1.70767	-1.30067	-0.7171	0.21954	-1.65204	-1.24504	-0.66147	-1.87158	-1.46458	-0.88101	0.407	0.99057	0.58357
chr1	54914649	54914658	-	chr1	54914430	54914767	NA	NA	0.19292	0.06619	0.094	0.0205	0.3256	0.22445	0.22935	0.83987	0.60926	1.32341	-0.54797	-0.15029	-0.17231	-0.23062	0.48354	-1.38784	-0.99017	-1.01218	0.71416	-1.15722	-0.75955	-0.78156	-1.87138	-1.4737	-1.49572	0.39767	0.37566	-0.02201
chr1	87626505	87626514	-	chr1	87626369	87626715	exon	Inpp5d	0.65202	0.61119	0.45742	0.34716	1.5203	0.51219	0.97609	0.08117	0.43589	0.75758	-1.11336	0.29933	-0.5203	0.35472	0.6764	-1.19454	0.21816	-0.60147	0.32169	-1.54925	-0.13656	-0.95619	-1.87094	-0.45825	-1.27788	1.4127	0.59306	-0.81963
chr4	155162523	155162532	-	chr4	155162374	155163033	NA	NA	0.22809	0.18604	0.08639	0.09915	0.61266	0.23698	0.19981	0.20166	0.83547	0.737	-1.13294	-0.03925	0.13247	0.6338	0.53533	-1.33461	-0.24091	-0.06919	-0.09847	-1.96841	-0.87472	-0.70299	-1.86994	-0.77625	-0.60452	1.09369	1.26542	0.17172
chr12	12270703	12270712	+	chr12	12270572	12270931	5UTR	Cyria	0.11169	0.02287	0.06211	0.03008	0.36017	0.13033	0.15454	0.81424	0.39735	0.72805	-1.1418	-0.12501	-0.2727	-0.41688	-0.08619	-1.95604	-0.93924	-1.08694	0.3307	-1.53915	-0.52236	-0.67006	-1.86985	-0.85306	-1.00075	1.0168	0.8691	-0.1477
chr1	88567445	88567454	-	chr1	88567236	88567830	exon	Gm41912	0.04678	0.03781	0.01254	0.03185	0.36618	0.10853	0.14063	0.09481	0.40123	0.16143	-1.70698	-0.52391	-0.73592	0.30642	0.06663	-1.80179	-0.61872	-0.83073	-0.23979	-2.10821	-0.92514	-1.13715	-1.86841	-0.68535	-0.89736	1.18307	0.97106	-0.21201
chr15	102393697	102393706	-	chr15	102393472	102394101	NA	NA	0.55691	0.30427	0.2806	0.24561	1.14648	0.50911	0.40154	0.70836	0.7967	0.93807	-0.93011	0.10999	0.39328	0.08834	0.22971	-1.63847	-0.59837	-0.31508	0.14137	-1.7268	-0.68671	-0.40342	-1.86818	-0.82808	-0.54479	1.0401	1.32339	0.28329
chr14	62858622	62858631	-	chr14	62858289	62858765	NA	NA	0.09859	0.0731	0.06179	0.05007	0.43199	0.16754	0.10818	0.20454	0.30549	0.41813	-1.44832	-0.44101	-0.07002	0.10095	0.2136	-1.65285	-0.64554	-0.27455	0.11264	-1.75381	-0.74649	-0.37551	-1.86645	-0.85914	-0.48815	1.00731	1.3783	0.37099
chr2	126499888	126499897	+	chr2	126499614	126500096	transcript	Atp8b4	0.14015	0.12524	0.08682	0.12128	0.69083	0.21454	0.23581	0.09482	0.37243	0.12108	-1.74387	-0.39765	-0.49376	0.27761	0.02627	-1.83868	-0.49247	-0.58857	-0.25134	-2.11629	-0.77008	-0.86618	-1.86495	-0.51874	-0.61484	1.34621	1.25011	-0.0961
chr4	150486272	150486281	+	chr4	150486116	150486438	transcript	Rere	0.23481	0.21401	0.05247	0.06621	0.4902	0.34146	0.20599	0.0942	1.16529	1.03614	-0.82873	-0.40502	0.13223	1.07108	0.94193	-0.92293	-0.49922	0.03803	-0.12915	-1.99401	-1.5703	-1.03305	-1.86487	-1.44115	-0.9039	0.42371	0.96096	0.53725
chr16	36626951	36626960	+	chr16	36626824	36627161	CDS	Cd86	0.42856	0.26041	0.11526	0.18993	0.94059	0.47618	0.30913	0.55985	1.31927	0.87948	-0.98505	-0.12576	0.37415	0.75942	0.31963	-1.5449	-0.68561	-0.1857	-0.43979	-2.30432	-1.44503	-0.94512	-1.86453	-1.00524	-0.50533	0.85929	1.3592	0.49991
chr9	119088388	119088397	+	chr9	119087849	119088831	transcript	Plcd1	0.65448	0.65597	0.2292	0.4271	1.80406	1.38791	0.92216	-0.00287	1.2109	0.52219	-1.3422	-0.98518	-0.44097	1.21377	0.52506	-1.33933	-0.98232	-0.4381	-0.68871	-2.5531	-2.19609	-1.65187	-1.86439	-1.50738	-0.96316	0.35701	0.90123	0.54422
chr17	28967217	28967226	+	chr17	28966758	28967706	stop_codon	Kctd20	0.21054	0.13991	0.13519	0.11183	0.65547	0.26497	0.30339	0.38032	0.4097	0.56461	-1.29854	-0.23705	-0.38365	0.02938	0.18429	-1.67886	-0.61737	-0.76397	0.15491	-1.70823	-0.64675	-0.79335	-1.86315	-0.80166	-0.94826	1.06148	0.91489	-0.1466
chr1	128608276	128608285	+	chr1	128608092	128608524	NA	NA	0.18095	0.0559	0.08699	0.06618	0.4893	0.20466	0.13367	0.87408	0.60258	0.77854	-1.08438	-0.11923	0.27195	-0.2715	-0.09554	-1.95845	-0.99331	-0.60212	0.17596	-1.68695	-0.72181	-0.33063	-1.86291	-0.89777	-0.50658	0.96515	1.35633	0.39118
chr5	135537590	135537599	+	chr5	135537289	135538228	exon	Gm52790	0.1305	0.10456	0.0778	0.05091	0.43337	0.15338	0.19192	0.17693	0.38549	0.63068	-1.23118	-0.13986	-0.34855	0.20856	0.45375	-1.40811	-0.3168	-0.52548	0.24518	-1.61667	-0.52536	-0.73404	-1.86186	-0.77054	-0.97923	1.09131	0.88263	-0.20869
chr6	136690161	136690170	-	chr6	136689882	136690423	exon	Gm4714	0.14092	0.11023	0.03879	0.05067	0.43247	0.26731	0.22758	0.20174	0.82184	0.69845	-1.16333	-0.62053	-0.45259	0.6201	0.4967	-1.36508	-0.82228	-0.65434	-0.1234	-1.98518	-1.44238	-1.27444	-1.86178	-1.31898	-1.15104	0.5428	0.71074	0.16794
chr1	54914682	54914691	+	chr1	54914430	54914767	NA	NA	0.17636	0.06626	0.08315	0.03666	0.38129	0.17455	0.19397	0.75355	0.60921	1.04764	-0.81335	0.00968	-0.09096	-0.14434	0.29409	-1.5669	-0.74387	-0.84451	0.43843	-1.42256	-0.59953	-0.70016	-1.86099	-1.03796	-1.1386	0.82303	0.7224	-0.10064
chr9	14835458	14835467	+	chr9	14835366	14835740	3UTR	Mre11a	0.05358	0.05227	0.05568	0.038	0.38613	0.1668	0.14103	0.01284	-0.02035	0.16067	-1.70024	-0.82039	-0.67044	-0.03319	0.14783	-1.71308	-0.83323	-0.68328	0.18102	-1.67989	-0.80004	-0.65009	-1.86091	-0.98106	-0.83111	0.87985	1.0298	0.14995
chr17	28736737	28736746	-	chr17	28736392	28736873	CDS	Mapk14	0.25572	0.15328	0.09818	0.06768	0.49349	0.28313	0.19877	0.49963	0.8629	1.11186	-0.74795	-0.10879	0.25623	0.36327	0.61223	-1.24757	-0.60841	-0.2434	0.24896	-1.61084	-0.97168	-0.60667	-1.85981	-1.22065	-0.85563	0.63916	1.00418	0.36502
chr16	16100010	16100019	+	chr16	16099734	16100131	exon	Gm18334	0.16032	0.08622	0.06908	0.06464	0.48242	0.26019	0.22297	0.4963	0.64027	0.68003	-1.17968	-0.47748	-0.31742	0.14397	0.18373	-1.67599	-0.97378	-0.81372	0.03976	-1.81996	-1.11775	-0.95769	-1.85972	-1.15751	-0.99746	0.7022	0.86226	0.16006
chr17	8158849	8158858	-	chr17	8158689	8159049	NA	NA	0.13505	0.0543	0.08146	0.06833	0.49565	0.09893	0.2206	0.62629	0.38404	0.49609	-1.36323	0.24729	-0.45743	-0.24225	-0.1302	-1.98952	-0.379	-1.08372	0.11205	-1.74727	-0.13675	-0.84147	-1.85932	-0.2488	-0.95351	1.61052	0.90581	-0.70472
chr19	29239670	29239679	-	chr19	29239537	29239817	exon	Gm41829	0.07141	0.08321	0.08099	0.08251	0.54706	0.21648	0.15047	-0.09927	-0.08111	-0.09357	-1.9528	-0.90744	-0.56291	0.01816	0.0057	-1.85353	-0.80817	-0.46364	-0.01246	-1.87169	-0.82633	-0.4818	-1.85923	-0.81387	-0.46934	1.04536	1.38989	0.34453
chr10	67644343	67644352	+	chr10	67644254	67644519	NA	NA	0.09791	0.02274	0.03187	0.02135	0.3247	0.11381	0.144	0.71592	0.60751	0.73317	-1.12447	-0.11469	-0.31017	-0.10841	0.01724	-1.84039	-0.83061	-1.02609	0.12566	-1.73198	-0.7222	-0.91768	-1.85764	-0.84786	-1.04333	1.00978	0.8143	-0.19548
chr15	83033416	83033425	+	chr15	83033176	83033516	transcript	Nfam1	0.13228	0.13407	0.04029	0.11264	0.65457	0.21228	0.21637	-0.01136	0.75167	0.13084	-1.72492	-0.43633	-0.45545	0.76302	0.14219	-1.71356	-0.42497	-0.44409	-0.62083	-2.47658	-1.18799	-1.20712	-1.85576	-0.56716	-0.58629	1.28859	1.26947	-0.01912
chr9	48558870	48558879	+	chr9	48558623	48559043	NA	NA	0.16646	0.15379	0.07545	0.09166	0.57844	0.33946	0.22379	0.07187	0.61946	0.48784	-1.3675	-0.73428	-0.28676	0.54759	0.41597	-1.43937	-0.80616	-0.35864	-0.13162	-1.98696	-1.35374	-0.90622	-1.85534	-1.22213	-0.7746	0.63321	1.08073	0.44752
chr13	106639141	106639150	+	chr13	106638864	106639393	NA	NA	0.08934	0.0272	0.02217	0.02993	0.35501	0.07618	0.09795	0.59612	0.65715	0.56405	-1.29106	0.10731	-0.06612	0.06102	-0.03207	-1.88719	-0.48882	-0.66225	-0.09309	-1.94821	-0.54984	-0.72327	-1.85512	-0.45675	-0.63018	1.39837	1.22494	-0.17343
chr9	8017407	8017416	-	chr9	8017240	8017999	3UTR	Cfap300	0.07041	0.04712	0.04408	0.07252	0.50845	0.23549	0.15276	0.22001	0.25138	-0.01837	-1.87195	-1.00184	-0.58508	0.03136	-0.23838	-2.09196	-1.22185	-0.80509	-0.26975	-2.12333	-1.25321	-0.83646	-1.85358	-0.98347	-0.56671	0.87011	1.28687	0.41676
chr12	110985300	110985309	+	chr12	110985117	110985569	exon	Gm51959	0.07121	0.07098	0.07648	0.04395	0.40488	0.18284	0.1331	0.00201	-0.04523	0.25972	-1.59293	-0.74387	-0.45843	-0.04724	0.25772	-1.59494	-0.74588	-0.46044	0.30496	-1.5477	-0.69864	-0.4132	-1.85266	-1.0036	-0.71816	0.84906	1.1345	0.28544
chr8	125720231	125720240	-	chr8	125720092	125720396	NA	NA	0.16287	0.14085	0.09777	0.06518	0.48114	0.12348	0.15028	0.12917	0.42119	0.68952	-1.1621	0.2399	0.07243	0.29202	0.56035	-1.29127	0.11073	-0.05674	0.26833	-1.58328	-0.18128	-0.34875	-1.85162	-0.44962	-0.61709	1.402	1.23453	-0.16747
chr9	48558889	48558898	+	chr9	48558623	48559043	NA	NA	0.16646	0.15084	0.07634	0.09166	0.57662	0.33946	0.23067	0.08913	0.61191	0.48784	-1.36359	-0.73428	-0.31764	0.52278	0.39871	-1.45272	-0.82342	-0.40677	-0.12407	-1.9755	-1.3462	-0.92955	-1.85143	-1.22213	-0.80548	0.6293	1.04595	0.41665
chr12	102283151	102283160	+	chr12	102282599	102283972	exon	Rin3	0.4977	0.33115	0.16047	0.15629	0.80924	0.51799	0.29837	0.47666	1.21656	1.24043	-0.61003	-0.04862	0.59234	0.73991	0.76378	-1.08669	-0.52528	0.11569	0.02387	-1.8266	-1.26519	-0.62422	-1.85047	-1.28906	-0.64809	0.56141	1.20237	0.64096
chr13	116949741	116949750	+	chr13	116949476	116949890	transcript	Parp8	0.11702	0.04658	0.04835	0.05721	0.45193	0.14567	0.18184	0.58513	0.56711	0.48015	-1.37029	-0.18347	-0.38605	-0.01802	-0.10498	-1.95542	-0.7686	-0.97118	-0.08696	-1.9374	-0.75058	-0.95316	-1.85044	-0.66362	-0.8662	1.18682	0.98424	-0.20259
chr6	52955490	52955499	-	chr6	52955278	52955844	exon	Gm33219	0.11552	0.07279	0.05494	0.03191	0.3606	0.12086	0.13779	0.32861	0.49166	0.73355	-1.11658	-0.03627	-0.14557	0.16304	0.40494	-1.4452	-0.36488	-0.47418	0.2419	-1.60824	-0.52792	-0.63722	-1.85014	-0.76982	-0.87912	1.08032	0.97102	-0.1093
chr11	117413433	117413442	+	chr11	117413138	117413532	exon	Gm11729	0.16675	0.04975	0.06399	0.07963	0.53235	0.22947	0.12833	0.85798	0.72194	0.58596	-1.26349	-0.3107	0.22973	-0.13605	-0.27202	-2.12148	-1.16868	-0.62826	-0.13598	-1.98543	-1.03263	-0.49221	-1.84945	-0.89665	-0.35623	0.9528	1.49322	0.54042
chr4	32768218	32768227	+	chr4	32767994	32768544	CDS	Mdn1	0.09173	0.09872	0.03303	0.0471	0.41489	0.18225	0.17293	-0.05323	0.54714	0.39588	-1.45291	-0.57213	-0.52266	0.60037	0.4491	-1.39969	-0.5189	-0.46944	-0.15127	-2.00006	-1.11927	-1.06981	-1.84879	-0.96801	-0.91854	0.88078	0.93025	0.04947
chr5	118048572	118048581	+	chr5	118048396	118049248	CDS	Tesc	0.07069	0.09889	0.05989	0.02514	0.33525	0.20255	0.14075	-0.22771	0.0977	0.46626	-1.38072	-0.84755	-0.51072	0.32541	0.69396	-1.15301	-0.61984	-0.28301	0.36856	-1.47842	-0.94525	-0.60842	-1.84698	-1.31381	-0.97698	0.53317	0.87	0.33683
chr17	26422555	26422564	+	chr17	26422333	26422720	exon	Neurl1b	0.11964	0.07819	0.06105	0.06947	0.49469	0.2175	0.15311	0.31077	0.46181	0.38564	-1.46125	-0.54352	-0.20974	0.15104	0.07486	-1.77203	-0.8543	-0.52052	-0.07617	-1.92306	-1.00533	-0.67155	-1.84689	-0.92916	-0.59538	0.91773	1.25151	0.33378
chr7	96730589	96730598	-	chr7	96730392	96730710	CDS	Tenm4	0.05642	0.04043	0.03136	0.02091	0.31963	0.06113	0.113	0.16186	0.26244	0.38775	-1.45782	-0.04441	-0.45998	0.10058	0.2259	-1.61968	-0.20627	-0.62184	0.12531	-1.72026	-0.30685	-0.72242	-1.84557	-0.43216	-0.84773	1.41341	0.99784	-0.41557
chr11	120539121	120539130	-	chr11	120538793	120539456	transcript	Gcgr	0.09135	0.1344	0.09989	0.07713	0.52147	0.17006	0.14755	-0.30094	-0.0649	0.115	-1.73008	-0.51003	-0.38162	0.23604	0.41594	-1.42913	-0.20909	-0.08067	0.1799	-1.66518	-0.44513	-0.31672	-1.84508	-0.62503	-0.49662	1.22004	1.34846	0.12842
chr13	112398249	112398258	+	chr13	112398153	112398481	NA	NA	0.09307	0.02237	0.01791	0.02249	0.32508	0.11333	0.0903	0.68369	0.73995	0.68221	-1.16258	-0.14816	0.02149	0.05626	-0.00148	-1.84627	-0.83185	-0.6622	-0.05774	-1.90253	-0.88811	-0.71845	-1.84479	-0.83037	-0.66071	1.01442	1.18407	0.16966
chr2	167949416	167949425	+	chr2	167949135	167949556	NA	NA	0.29059	0.35289	0.14024	0.1616	0.82445	0.59751	0.37109	-0.21647	0.71473	0.58896	-1.25534	-0.84601	-0.27403	0.9312	0.80543	-1.03887	-0.62954	-0.05756	-0.12577	-1.97007	-1.56075	-0.98876	-1.8443	-1.43497	-0.86299	0.40932	0.98131	0.57199
chr12	3834615	3834624	-	chr12	3834079	3835437	5UTR	Dnmt3a	0.63126	0.47631	0.26841	0.26048	1.17925	0.76323	0.72296	0.34662	1.00038	1.03227	-0.81173	-0.24111	-0.17171	0.65376	0.68566	-1.15835	-0.58772	-0.51833	0.0319	-1.81211	-1.24149	-1.17209	-1.84401	-1.27338	-1.20399	0.57062	0.64002	0.0694
chr13	46181066	46181075	+	chr13	46180681	46181223	NA	NA	0.06728	0.03306	0.01443	0	0.244	0.08046	0.09852	0.34346	0.57172	0.77724	-1.06629	-0.11316	-0.25508	0.22826	0.43378	-1.40974	-0.45662	-0.59853	0.20552	-1.638	-0.68488	-0.82679	-1.84353	-0.8904	-1.03232	0.95313	0.81121	-0.14192
chr11	115285498	115285507	+	chr11	115285345	115285630	CDS	Fads6	0.09986	0.12458	0.09677	0.03727	0.37758	0.14783	0.08985	-0.17294	0.02315	0.56159	-1.28139	-0.31861	0.07638	0.19609	0.73453	-1.10846	-0.14567	0.24932	0.53844	-1.30454	-0.34176	0.05323	-1.84298	-0.8802	-0.48521	0.96278	1.35778	0.39499
chr9	114742865	114742874	-	chr9	114742708	114743172	transcript	Cmtm6	0.13468	0.10185	0.03064	0.03167	0.35732	0.24217	0.18236	0.22332	0.87425	0.8624	-0.98004	-0.55536	-0.27295	0.65093	0.63908	-1.20336	-0.77867	-0.49626	-0.01185	-1.85429	-1.42961	-1.1472	-1.84244	-1.41776	-1.13535	0.42469	0.7071	0.28241
chr12	110503553	110503562	-	chr12	110503279	110503755	NA	NA	0.7145	0.37721	0.28226	0.37632	1.59321	0.88396	0.75262	0.77856	1.10301	0.78128	-1.06109	-0.27445	-0.06645	0.32445	0.00273	-1.83965	-1.05301	-0.84501	-0.32172	-2.16409	-1.37746	-1.16945	-1.84237	-1.05573	-0.84773	0.78664	0.99464	0.208
chr11	103436459	103436468	+	chr11	103436320	103436821	NA	NA	0.11128	0.09768	0.03797	0.04214	0.39472	0.22822	0.13659	0.09877	0.63641	0.59161	-1.2504	-0.64982	-0.16754	0.53764	0.49284	-1.34917	-0.74858	-0.26631	-0.0448	-1.88681	-1.28622	-0.80395	-1.84201	-1.24143	-0.75916	0.60058	1.08285	0.48227
chr13	56159280	56159289	-	chr13	56158908	56160060	NA	NA	0.54205	0.22284	0.18358	0.13487	0.72687	0.35338	0.29618	1.00481	1.1955	1.4736	-0.36789	0.5074	0.70464	0.19069	0.46879	-1.3727	-0.49741	-0.30017	0.2781	-1.56339	-0.6881	-0.49086	-1.84149	-0.9662	-0.76896	0.87529	1.07253	0.19724
chr11	103436479	103436488	+	chr11	103436320	103436821	NA	NA	0.12629	0.09768	0.05264	0.04219	0.39472	0.26494	0.12891	0.20046	0.5863	0.69277	-1.14871	-0.70371	-0.01704	0.38584	0.49231	-1.34917	-0.90417	-0.2175	0.10647	-1.73501	-1.29001	-0.60334	-1.84148	-1.39648	-0.70981	0.445	1.13167	0.68667
chr7	91716910	91716919	+	chr7	91716699	91717057	exon	Dlg2	0.08439	0.05756	0.00068	0	0.24352	0.0905	0.08057	0.23479	0.91212	0.92249	-0.91899	-0.04852	0.03118	0.67733	0.6877	-1.15377	-0.28331	-0.2036	0.01037	-1.83111	-0.96064	-0.88093	-1.84148	-0.97101	-0.89131	0.87047	0.95017	0.0797
chr13	107838251	107838260	+	chr13	107838107	107838568	NA	NA	0.29356	0.22841	0.13423	0.14359	0.75804	0.5066	0.33544	0.26534	0.76328	0.70536	-1.13599	-0.63165	-0.14795	0.49795	0.44002	-1.40133	-0.89699	-0.41328	-0.05792	-1.89928	-1.39494	-0.91123	-1.84135	-1.33701	-0.8533	0.50434	0.98805	0.48371
chr3	84069516	84069525	-	chr3	84069123	84069802	transcript	Gm30458	0.11872	0.07731	0.0703	0.02054	0.31674	0.20659	0.10965	0.31194	0.37212	0.89165	-0.94845	-0.49835	0.06279	0.06019	0.57972	-1.26039	-0.81028	-0.24915	0.51953	-1.32058	-0.87047	-0.30934	-1.84011	-1.39	-0.82886	0.45011	1.01124	0.56113
chr7	24954532	24954541	-	chr7	24954370	24954767	transcript	Gm36809	0.1985	0.1842	0.06122	0.07347	0.50598	0.26986	0.19629	0.07225	0.91303	0.80361	-1.03585	-0.31471	0.01093	0.84078	0.73136	-1.1081	-0.38696	-0.06132	-0.10942	-1.94888	-1.22774	-0.9021	-1.83946	-1.11832	-0.79268	0.72114	1.04678	0.32564
chr12	105001155	105001164	-	chr12	105000932	105001273	5UTR	Syne3	0.25505	0.26846	0.16129	0.07307	0.5045	0.2756	0.27153	-0.05435	0.45092	1.06186	-0.77749	-0.08247	-0.06651	0.50527	1.11621	-0.72314	-0.02812	-0.01216	0.61094	-1.2284	-0.53339	-0.51743	-1.83934	-1.14433	-1.12837	0.69501	0.71098	0.01596
chr2	156877900	156877909	-	chr2	156877759	156878081	CDS	Sla2	0.33145	0.16995	0.20819	0.14216	0.75097	0.53506	0.57178	0.68821	0.49319	0.84855	-0.98949	-0.56393	-0.64575	-0.19502	0.16034	-1.6777	-1.25214	-1.33396	0.35536	-1.48268	-1.05712	-1.13894	-1.83804	-1.41248	-1.4943	0.42556	0.34374	-0.08182
chr3	82362615	82362624	-	chr3	82362504	82362756	CDS	Map9	0.3033	0.19314	0.09149	0.13464	0.72393	0.56956	0.38084	0.46813	1.09785	0.79648	-1.04128	-0.73963	-0.25706	0.62973	0.32836	-1.50941	-1.20776	-0.72519	-0.30137	-2.13913	-1.83749	-1.35492	-1.83776	-1.53612	-1.05355	0.30165	0.78422	0.48257
chr17	26605736	26605745	-	chr17	26605622	26606079	5UTR	Ergic1	0.12429	0.08578	0.07443	0.04541	0.40471	0.19869	0.1514	0.27966	0.37361	0.64598	-1.19103	-0.42271	-0.16871	0.09395	0.36632	-1.47069	-0.70237	-0.44837	0.27237	-1.56464	-0.79632	-0.54232	-1.83701	-1.06869	-0.81469	0.76832	1.02232	0.254
chr6	144902805	144902814	+	chr6	144901669	144903120	NA	NA	0.36446	0.56854	0.31806	0.19264	0.93037	0.48438	0.54837	-0.53097	0.15385	0.67708	-1.15943	-0.33506	-0.48638	0.68482	1.20805	-0.62847	0.19591	0.04459	0.52323	-1.31329	-0.48891	-0.64024	-1.83652	-1.01214	-1.16347	0.82438	0.67305	-0.15132
chr7	116443451	116443460	-	chr7	116443007	116444013	transcript	Pik3c2a	0.6913	0.33169	0.23487	0.25839	1.16514	0.52646	0.70525	0.88305	1.25509	1.15551	-0.68095	0.33978	-0.02539	0.37204	0.27245	-1.564	-0.54327	-0.90845	-0.09958	-1.93604	-0.91531	-1.28048	-1.83646	-0.81572	-1.1809	1.02073	0.65556	-0.36518
chr17	32524116	32524125	-	chr17	32523971	32524224	CDS	Cyp4f17	0.55117	0.36549	0.28569	0.22663	1.05168	0.55492	0.4179	0.48942	0.76447	1.0082	-0.82821	-0.00836	0.33367	0.27505	0.51878	-1.31763	-0.49778	-0.15575	0.24374	-1.59268	-0.77282	-0.43079	-1.83641	-1.01656	-0.67453	0.81985	1.16188	0.34203
chr14	21707174	21707183	+	chr14	21706700	21707555	5UTR	Dupd1	0.14122	0.0768	0.01646	0.10901	0.63085	0.17406	0.37595	0.46113	1.08876	0.21222	-1.62264	-0.18836	-0.99773	0.62763	-0.24891	-2.08376	-0.64948	-1.45886	-0.87654	-2.71139	-1.27712	-2.08649	-1.83485	-0.40057	-1.20995	1.43428	0.62491	-0.80937
chr4	40287606	40287615	+	chr4	40287480	40287791	NA	NA	0.09228	0.16528	0.05194	0.04032	0.38575	0.19028	0.11676	-0.47649	0.35156	0.47105	-1.36363	-0.60917	-0.1779	0.82806	0.94754	-0.88713	-0.13268	0.29859	0.11949	-1.71519	-0.96074	-0.52947	-1.83468	-1.08022	-0.64895	0.75445	1.18572	0.43127
chr14	25789414	25789423	-	chr14	25789182	25789544	NA	NA	0.06288	0.05102	0.04325	0.02126	0.3177	0.10838	0.13839	0.11322	0.19253	0.44394	-1.39051	-0.36689	-0.56614	0.07931	0.33072	-1.50373	-0.48011	-0.67936	0.25141	-1.58304	-0.55942	-0.75867	-1.83445	-0.81083	-1.01008	1.02362	0.82437	-0.19925
chr2	103606052	103606061	+	chr2	103605676	103606488	exon	8030431J09Rik	0.05325	0.06263	0.03029	0.06672	0.47981	0.21665	0.16985	-0.08895	0.24411	-0.12608	-1.96049	-1.07574	-0.84037	0.33305	-0.03713	-1.87154	-0.98679	-0.75142	-0.37018	-2.20459	-1.31984	-1.08448	-1.83441	-0.94966	-0.71429	0.88475	1.12012	0.23537
chr7	90019793	90019802	+	chr7	90019574	90019934	NA	NA	0.26952	0.29585	0.2217	0.18136	0.88842	0.26678	0.31005	-0.10082	0.20333	0.4004	-1.43368	0.01091	-0.1524	0.30415	0.50122	-1.33286	0.11173	-0.05158	0.19707	-1.63701	-0.19242	-0.35573	-1.83408	-0.38949	-0.5528	1.44459	1.28128	-0.16331
chr1	172475351	172475360	+	chr1	172475120	172475618	5UTR	Slamf9	0.09463	0.0785	0.06004	0.04887	0.41597	0.19152	0.12766	0.12878	0.29183	0.40024	-1.43365	-0.59738	-0.2325	0.16304	0.27146	-1.56243	-0.72617	-0.36129	0.10842	-1.72547	-0.88921	-0.52433	-1.83389	-0.99763	-0.63275	0.83626	1.20114	0.36488
chr1	85961152	85961161	+	chr1	85960898	85961282	transcript	Gpr55	0.11569	0.08911	0.06469	0.02338	0.32476	0.1345	0.15806	0.1953	0.40149	0.83572	-0.99701	-0.12379	-0.26522	0.2062	0.64042	-1.19231	-0.31909	-0.46052	0.43423	-1.3985	-0.52529	-0.66672	-1.83273	-0.95952	-1.10094	0.87321	0.73179	-0.14143
chr5	113999598	113999607	+	chr5	113998971	113999726	5UTR	Dao	0.1816	0.19887	0.11583	0.12393	0.68274	0.34381	0.37844	-0.08761	0.39295	0.33837	-1.49401	-0.66724	-0.77701	0.48055	0.42597	-1.4064	-0.57964	-0.6894	-0.05458	-1.88696	-1.06019	-1.16996	-1.83238	-1.00561	-1.11538	0.82677	0.717	-0.10977
chr10	86385866	86385875	-	chr10	86385511	86386025	transcript	Syn3	0.03823	0.09076	0.02275	0.02589	0.33356	0.17411	0.12433	-0.48183	0.17927	0.14106	-1.6912	-1.0184	-0.72239	0.66109	0.62289	-1.20937	-0.53657	-0.24056	-0.03821	-1.87046	-1.19766	-0.90165	-1.83225	-1.15945	-0.86344	0.6728	0.96881	0.29601
chr6	51768099	51768108	-	chr6	51767735	51768502	NA	NA	0.72087	0.33636	0.1914	0.17093	0.84988	0.81287	0.52465	0.92063	1.51276	1.62004	-0.21197	-0.15428	0.39731	0.59213	0.69941	-1.1326	-1.07491	-0.52332	0.10728	-1.72474	-1.66704	-1.11546	-1.83201	-1.77432	-1.22273	0.05769	0.60928	0.55159
chr4	140868704	140868713	-	chr4	140868538	140869059	NA	NA	0.07388	0.10783	0.09329	0.05253	0.42822	0.38946	0.10723	-0.26535	-0.15762	0.19592	-1.63577	-1.52457	-0.26106	0.10773	0.46127	-1.37042	-1.25922	0.00429	0.35354	-1.47815	-1.36694	-0.10344	-1.83169	-1.72049	-0.45698	0.11121	1.37471	1.26351
chr13	12412336	12412345	+	chr13	12411892	12412567	CDS	Heatr1	0.23309	0.14415	0.13731	0.072	0.49724	0.33469	0.26901	0.45741	0.4994	0.97744	-0.85356	-0.38999	-0.15021	0.042	0.52003	-1.31097	-0.84739	-0.60762	0.47803	-1.35297	-0.88939	-0.64962	-1.831	-1.36742	-1.12765	0.46358	0.70335	0.23977
chr11	3298277	3298286	-	chr11	3297825	3298340	CDS	Patz1	0.10749	0.1516	0.10737	0.06766	0.48164	0.25826	0.21308	-0.28528	0.00086	0.31731	-1.5133	-0.80517	-0.60729	0.28614	0.60259	-1.22801	-0.51989	-0.32201	0.31645	-1.51415	-0.80603	-0.60815	-1.8306	-1.12247	-0.9246	0.70813	0.906	0.19788
chr12	86884882	86884891	-	chr12	86884348	86885064	exon	Irf2bpl	0.23384	0.28062	0.29992	0.1696	0.84368	0.37976	0.34718	-0.1923	-0.26473	0.31437	-1.51539	-0.53083	-0.42809	-0.07243	0.50667	-1.32309	-0.33853	-0.23579	0.5791	-1.25066	-0.2661	-0.16337	-1.82976	-0.8452	-0.74247	0.98456	1.0873	0.10273
chr5	116116850	116116859	+	chr5	116116238	116116978	3UTR	Ccdc60	0.28935	0.18244	0.21564	0.14156	0.74353	0.33919	0.41191	0.47133	0.30785	0.70198	-1.12697	-0.17623	-0.39999	-0.16349	0.23065	-1.5983	-0.64756	-0.87132	0.39413	-1.43482	-0.48408	-0.70784	-1.82895	-0.87821	-1.10197	0.95074	0.72698	-0.22376
chr2	157138147	157138156	-	chr2	157138028	157138273	3UTR	Rbl1	0.21296	0.109	0.08392	0.09454	0.57612	0.32678	0.25595	0.59597	0.78597	0.70244	-1.12573	-0.4547	-0.18895	0.19	0.10647	-1.7217	-1.05067	-0.78492	-0.08353	-1.9117	-1.24067	-0.97492	-1.82818	-1.15714	-0.8914	0.67103	0.93678	0.26574
chr3	40500628	40500637	+	chr3	40500315	40500792	exon	1700017G19Rik	0.07412	0.02745	0.07924	0.04868	0.41291	0.1373	0.10393	0.46831	-0.04322	0.23633	-1.59081	-0.45969	-0.23518	-0.51152	-0.23198	-2.05911	-0.92799	-0.70348	0.27954	-1.54759	-0.41647	-0.19196	-1.82713	-0.69601	-0.4715	1.13112	1.35563	0.22451
chr15	12479438	12479447	+	chr15	12479293	12479842	transcript	Pdzd2	0.17397	0.22856	0.10946	0.10105	0.59859	0.2362	0.08734	-0.26727	0.3969	0.45772	-1.36911	-0.30102	0.56273	0.66417	0.72499	-1.10184	-0.03375	0.83	0.06082	-1.76601	-0.69792	0.16583	-1.82683	-0.75874	0.10501	1.06809	1.93184	0.86375
chr2	92563125	92563134	-	chr2	92562977	92563298	NA	NA	0.07677	0.05883	0.03099	0.03933	0.3795	0.14919	0.13306	0.15988	0.44947	0.35646	-1.46996	-0.5094	-0.4105	0.28959	0.19658	-1.62984	-0.66928	-0.57038	-0.09301	-1.91943	-0.95887	-0.85997	-1.82642	-0.86586	-0.76696	0.96056	1.05946	0.09891
chr9	45086465	45086474	-	chr9	45086252	45086671	5UTR	Jaml	0.09802	0.02249	0.03805	0.06071	0.45527	0.16754	0.22409	0.71983	0.53932	0.31124	-1.51504	-0.44528	-0.72743	-0.18051	-0.4086	-2.23487	-1.16511	-1.44727	-0.22808	-2.05436	-0.9846	-1.26676	-1.82628	-0.75651	-1.03867	1.06976	0.7876	-0.28216
chr4	118999826	118999835	-	chr4	118999614	119000398	NA	NA	0.11037	0.0249	0.02823	0.0706	0.49018	0.24322	0.18185	0.78017	0.7404	0.31179	-1.51408	-0.72181	-0.43224	-0.03977	-0.46837	-2.29425	-1.50198	-1.21241	-0.42861	-2.25448	-1.46221	-1.17264	-1.82588	-1.03361	-0.74404	0.79227	1.08184	0.28957
chr14	13361818	13361827	-	chr14	13361648	13362090	NA	NA	0.06723	0.02328	0.00048	0.03491	0.36288	0.1675	0.19741	0.45833	0.76946	0.3222	-1.50125	-0.69683	-0.85293	0.31114	-0.13613	-1.95958	-1.15516	-1.31126	-0.44727	-2.27071	-1.4663	-1.62239	-1.82345	-1.01903	-1.17513	0.80441	0.64832	-0.1561
chr13	48842464	48842473	-	chr13	48842303	48842602	NA	NA	0.14488	0.12373	0.12385	0.12205	0.67129	0.20243	0.21368	0.1336	0.13281	0.14476	-1.67868	-0.31111	-0.36481	-0.00079	0.01116	-1.81228	-0.44471	-0.49841	0.01196	-1.81149	-0.44392	-0.49761	-1.82344	-0.45587	-0.50957	1.36757	1.31388	-0.05369
chr1	159735349	159735358	+	chr1	159735137	159735425	transcript	Tnr	0.0214	0.09661	0.03231	0.01864	0.30509	0.0976	0.14356	-0.72275	-0.13006	0.03485	-1.78785	-0.73021	-1.04004	0.59269	0.7576	-1.0651	-0.00746	-0.31729	0.1649	-1.6578	-0.60016	-0.90999	-1.8227	-0.76506	-1.07489	1.05764	0.74781	-0.30983
chr13	46340115	46340124	-	chr13	46339911	46340327	NA	NA	0.12376	0.04371	0.10878	0.04556	0.40002	0.20205	0.08824	0.66014	0.1027	0.64093	-1.18091	-0.44266	0.25658	-0.55744	-0.01922	-1.84105	-1.10281	-0.40357	0.53823	-1.28361	-0.54537	0.15388	-1.82183	-1.08359	-0.38435	0.73824	1.43748	0.69924
chr8	82874242	82874251	+	chr8	82874127	82874550	exon	Rnf150	0.05938	0.04789	0.04317	0	0.23884	0.114	0.09399	0.11215	0.16087	0.7049	-1.11645	-0.43886	-0.29311	0.04872	0.59275	-1.2286	-0.551	-0.40526	0.54403	-1.27732	-0.59972	-0.45398	-1.82135	-1.14375	-0.99801	0.6776	0.82334	0.14574
chr13	52078827	52078836	-	chr13	52078542	52079162	exon	Gm40948	0.2157	0.10784	0.0826	0.05688	0.43983	0.15402	0.2824	0.61704	0.80951	1.03625	-0.78502	0.32013	-0.28119	0.19247	0.41921	-1.40206	-0.29691	-0.89823	0.22674	-1.59453	-0.48938	-1.0907	-1.82127	-0.71612	-1.31743	1.10515	0.50383	-0.60131
chr15	81045544	81045553	+	chr15	81045236	81046018	CDS	Mrtfa	0.5415	0.41521	0.19007	0.2002	0.94613	0.63924	0.68978	0.31949	1.16094	1.11044	-0.71058	-0.20632	-0.30245	0.84145	0.79095	-1.03007	-0.52581	-0.62194	-0.05051	-1.87152	-1.36726	-1.46339	-1.82102	-1.31675	-1.41289	0.50426	0.40813	-0.09613
chr1	193201757	193201766	+	chr1	193201029	193201785	transcript	Traf3ip3	0.10745	0.23811	0.1284	0.03756	0.37093	0.16984	0.13233	-0.72054	-0.14257	0.61375	-1.20558	-0.38882	-0.16781	0.57797	1.33429	-0.48504	0.33172	0.55273	0.75632	-1.06301	-0.24625	-0.02524	-1.81933	-1.00257	-0.78156	0.81676	1.03777	0.22101
chr13	108297751	108297760	+	chr13	108297229	108297929	NA	NA	0.94368	0.97273	0.52838	0.32041	1.36835	1.10827	0.84682	-0.03982	0.73726	1.32371	-0.49483	-0.21235	0.14134	0.77709	1.36353	-0.455	-0.17253	0.18116	0.58645	-1.23209	-0.94961	-0.59593	-1.81853	-1.53606	-1.18237	0.28247	0.63616	0.35369
chr12	79321100	79321109	-	chr12	79320905	79321640	CDS	Rad51b	0.07504	0.06595	0.08749	0.03937	0.37701	0.20585	0.11597	0.07962	-0.10238	0.34136	-1.47703	-0.82595	-0.3124	-0.182	0.26174	-1.55665	-0.90557	-0.39203	0.44374	-1.37465	-0.72357	-0.21002	-1.81839	-1.16731	-0.65376	0.65108	1.16462	0.51354
chr7	127922525	127922534	-	chr7	127922219	127922814	CDS	Kat8	0.18931	0.15117	0.10192	0.08009	0.52051	0.1998	0.3086	0.2084	0.53155	0.70175	-1.11637	-0.05241	-0.50659	0.32315	0.49335	-1.32477	-0.26081	-0.71499	0.1702	-1.64792	-0.58396	-1.03814	-1.81812	-0.75416	-1.20834	1.06396	0.60978	-0.45418
chr1	152798262	152798271	-	chr1	152798166	152798497	NA	NA	0.27734	0.11162	0.08903	0.14144	0.73676	0.22658	0.26879	0.85198	1.01966	0.65682	-1.16115	0.2119	0.03358	0.16768	-0.19516	-2.01313	-0.64008	-0.81839	-0.36284	-2.18082	-0.80776	-0.98608	-1.81798	-0.44492	-0.62324	1.37306	1.19474	-0.17832
chr3	107038300	107038309	+	chr3	107037997	107038483	exon	Kcna3	0.20347	0.23555	0.12847	0.17351	0.84871	0.29438	0.28194	-0.14764	0.41873	0.15302	-1.66324	-0.38444	-0.33751	0.56636	0.30065	-1.51561	-0.23681	-0.18987	-0.26571	-2.08197	-0.80317	-0.75623	-1.81626	-0.53746	-0.49052	1.2788	1.32574	0.04694
chr17	47754393	47754402	-	chr17	47753029	47754604	5UTR	Tfeb	0.27243	0.25568	0.18015	0.18802	0.89962	0.42321	0.21566	0.06746	0.41824	0.37745	-1.43854	-0.49693	0.24267	0.35079	0.30999	-1.50599	-0.56438	0.17522	-0.0408	-1.85678	-0.91517	-0.17557	-1.81598	-0.87437	-0.13477	0.94161	1.68121	0.7396
chr5	100162228	100162237	-	chr5	100162104	100162382	5UTR	Tmem150c	0.09486	0.10017	0.0263	0.03805	0.3712	0.19871	0.06736	-0.03995	0.64959	0.51541	-1.2994	-0.63148	0.22671	0.68954	0.55536	-1.25945	-0.59153	0.26666	-0.13418	-1.94899	-1.28107	-0.42288	-1.81481	-1.14689	-0.2887	0.66792	1.52611	0.85819
chr5	111178721	111178730	-	chr5	111178196	111179025	NA	NA	0.2202	0.18658	0.12349	0.13482	0.71163	0.33932	0.35417	0.16313	0.53022	0.45704	-1.35773	-0.46343	-0.51202	0.36709	0.29391	-1.52087	-0.62657	-0.67515	-0.07318	-1.88796	-0.99366	-1.04224	-1.81478	-0.92048	-0.96906	0.8943	0.84571	-0.04859
chr4	140740805	140740814	+	chr4	140740494	140741102	CDS	Padi6	0.09203	0.11347	0	0.0337	0.35583	0.14626	0.22639	-0.15717	0.98291	0.54189	-1.27271	-0.36862	-0.78348	1.14008	0.69906	-1.11554	-0.21146	-0.62631	-0.44102	-2.25562	-1.35153	-1.76639	-1.8146	-0.91052	-1.32537	0.90408	0.48923	-0.41486
chr16	11456596	11456605	-	chr16	11455558	11456817	CDS	Snx29	0.91025	0.68163	0.16029	0.25651	1.13956	0.8195	0.7374	0.37257	1.98051	1.51792	-0.29664	0.13661	0.27243	1.60794	1.14535	-0.66921	-0.23597	-0.10014	-0.46259	-2.27716	-1.84391	-1.70808	-1.81456	-1.38132	-1.24549	0.43325	0.56907	0.13582
chr4	125116602	125116611	-	chr4	125116211	125116885	3UTR	Zc3h12a	0.12612	0.21181	0.09403	0.07052	0.48513	0.26168	0.18042	-0.47389	0.22705	0.41947	-1.39458	-0.69167	-0.31777	0.70093	0.89336	-0.9207	-0.21778	0.15612	0.19243	-1.62163	-0.91871	-0.54482	-1.81406	-1.11114	-0.73725	0.70292	1.07681	0.37389
chr1	60916327	60916336	-	chr1	60916216	60916839	transcript	Ctla4	0.12975	0.03495	0.0397	0.0408	0.38053	0.1546	0.14425	0.79389	0.7418	0.73001	-1.08376	-0.15178	-0.09049	-0.05209	-0.06389	-1.87765	-0.94567	-0.88438	-0.0118	-1.82556	-0.89358	-0.83229	-1.81377	-0.88178	-0.8205	0.93198	0.99327	0.06129
chr4	133821063	133821072	-	chr4	133820654	133821236	exon	Gm12974	0.27762	0.2004	0.17358	0.18389	0.88294	0.5375	0.30504	0.3358	0.47348	0.41899	-1.39384	-0.76456	-0.10264	0.13768	0.08319	-1.72964	-1.10035	-0.43843	-0.05449	-1.86732	-1.23804	-0.57612	-1.81283	-1.18354	-0.52163	0.62929	1.2912	0.66192
chr9	102541869	102541878	-	chr9	102541733	102541983	CDS	Ky	0.089	0.01998	0.04813	0.01039	0.27332	0.17555	0.07243	0.68187	0.36407	0.80838	-1.00421	-0.55808	0.13673	-0.3178	0.12651	-1.68608	-1.23995	-0.54514	0.44431	-1.36827	-0.92214	-0.22733	-1.81258	-1.36646	-0.67165	0.44613	1.14094	0.69481
chr1	131672598	131672607	-	chr1	131672264	131672917	CDS	Ctse	0.11662	0.04288	0.07894	0.0849	0.53485	0.16248	0.21094	0.62081	0.284	0.23519	-1.57694	-0.2839	-0.53335	-0.33681	-0.38562	-2.19775	-0.90471	-1.15416	-0.04881	-1.86093	-0.5679	-0.81735	-1.81212	-0.51908	-0.76854	1.29304	1.04358	-0.24946
chr9	21436486	21436495	-	chr9	21436038	21436597	NA	NA	0.36331	0.28642	0.21956	0.14581	0.74859	0.4637	0.30773	0.26542	0.54407	0.93057	-0.8813	-0.28617	0.18684	0.27865	0.66515	-1.14672	-0.55159	-0.07858	0.3865	-1.42537	-0.83024	-0.35723	-1.81186	-1.21674	-0.74373	0.59512	1.06814	0.47301
chr7	139131743	139131752	+	chr7	139131528	139131873	5UTR	Stk32c	0.08551	0.12592	0.05616	0.04804	0.40521	0.25154	0.17046	-0.29255	0.25717	0.33724	-1.4743	-0.94382	-0.55834	0.54972	0.62978	-1.18175	-0.65128	-0.26579	0.08007	-1.73147	-1.201	-0.81551	-1.81153	-1.28106	-0.89558	0.53047	0.91596	0.38548
chr11	76306948	76306957	+	chr11	76306664	76307287	NA	NA	0.19421	0.04187	0.05987	0.06169	0.45311	0.24167	0.10243	1.08349	0.90432	0.88738	-0.92412	-0.21975	0.55252	-0.17918	-0.19611	-2.00761	-1.30324	-0.53097	-0.01694	-1.82844	-1.12406	-0.3518	-1.8115	-1.10713	-0.33486	0.70437	1.47664	0.77227
chr17	8195897	8195906	+	chr17	8195548	8196309	3UTR	Cep43	0.0748	0.02122	0.08325	0.03687	0.36592	0.14668	0.11701	0.54993	-0.07037	0.36656	-1.44472	-0.51116	-0.32157	-0.6203	-0.18337	-1.99465	-1.0611	-0.8715	0.43693	-1.37435	-0.4408	-0.2512	-1.81128	-0.87773	-0.68813	0.93355	1.12315	0.18959
chr7	3295820	3295829	+	chr7	3295737	3296014	transcript	Myadm	0.093	0.09114	0.01717	0.03132	0.34639	0.13827	0.21371	0.0144	0.74896	0.57647	-1.23463	-0.31239	-0.71778	0.73456	0.56207	-1.24904	-0.32679	-0.73218	-0.17248	-1.98359	-1.06135	-1.46673	-1.81111	-0.88886	-1.29425	0.92225	0.51686	-0.40539
chr9	123925485	123925494	+	chr9	123925230	123925688	exon	Gm51701	0.33693	0.46417	0.40998	0.46495	1.86641	1.0625	0.56157	-0.37306	-0.22579	-0.37507	-2.18498	-1.42371	-0.60501	0.14727	-0.00201	-1.81192	-1.05065	-0.23195	-0.14928	-1.95919	-1.19792	-0.37922	-1.8099	-1.04864	-0.22994	0.76126	1.57997	0.81871
chr5	108636357	108636366	+	chr5	108636253	108636749	transcript	Tmem175	0.08594	0.10974	0.0948	0.0725	0.49023	0.2169	0.20961	-0.17898	-0.06925	0.11183	-1.69763	-0.78809	-0.75389	0.10973	0.29081	-1.51866	-0.60911	-0.57491	0.18108	-1.62839	-0.71884	-0.68464	-1.80947	-0.89992	-0.86572	0.90954	0.94375	0.0342
chr11	113733776	113733785	+	chr11	113733599	113734349	transcript	Cdc42ep4	0.1663	0.21615	0.18281	0.15557	0.78125	0.27283	0.24931	-0.25257	-0.08864	0.06067	-1.74855	-0.49453	-0.399	0.16393	0.31324	-1.49598	-0.24197	-0.14643	0.14931	-1.65991	-0.4059	-0.31036	-1.80922	-0.55521	-0.45967	1.25401	1.34955	0.09553
chr4	137815681	137815690	-	chr4	137815437	137815862	NA	NA	0.04675	0.0566	0.07181	0.04064	0.3781	0.14045	0.20529	-0.09742	-0.23601	0.06391	-1.74416	-0.73512	-1.08705	-0.13859	0.16133	-1.64674	-0.6377	-0.98963	0.29992	-1.50815	-0.49911	-0.85104	-1.80807	-0.79903	-1.15097	1.00904	0.65711	-0.35193
chr3	121547916	121547925	+	chr3	121547678	121548233	exon	Gm40135	0.37469	0.21391	0.14363	0.14395	0.73973	0.49798	0.30676	0.60572	0.97917	0.97723	-0.83061	-0.33675	0.22577	0.37345	0.37151	-1.43633	-0.94248	-0.37996	-0.00194	-1.80978	-1.31592	-0.7534	-1.80784	-1.31398	-0.75146	0.49386	1.05637	0.56252
chr4	155201087	155201096	+	chr4	155200658	155201436	NA	NA	0.20322	0.18685	0.10725	0.12245	0.66437	0.39987	0.25335	0.08166	0.56196	0.45705	-1.35063	-0.73212	-0.22468	0.4803	0.37538	-1.43229	-0.81378	-0.30634	-0.10492	-1.9126	-1.29408	-0.78665	-1.80768	-1.18916	-0.68173	0.61852	1.12595	0.50743
chr8	3355807	3355816	-	chr8	3355362	3356059	transcript	Gm30369	0.2153	0.32222	0.2147	0.16184	0.80164	0.36396	0.31465	-0.42804	0.0028	0.27352	-1.53315	-0.56584	-0.40158	0.43084	0.70156	-1.10511	-0.1378	0.02646	0.27072	-1.53595	-0.56864	-0.40437	-1.80667	-0.83936	-0.6751	0.96731	1.13157	0.16426
chr12	77177496	77177505	-	chr12	77177374	77177589	NA	NA	0.19187	0.26326	0.10185	0.07545	0.49927	0.29612	0.2439	-0.32136	0.54503	0.75363	-1.05268	-0.44822	-0.24104	0.86639	1.075	-0.73131	-0.12686	0.08032	0.2086	-1.59771	-0.99325	-0.78607	-1.80631	-1.20186	-0.99468	0.60445	0.81163	0.20718
chr7	102514346	102514355	+	chr7	102513959	102514490	exon	Gm8556	0.57863	0.2622	0.12711	0.1388	0.72076	0.57614	0.47676	0.91665	1.60395	1.52971	-0.27647	0.00535	0.23683	0.68731	0.61306	-1.19312	-0.9113	-0.67982	-0.07424	-1.88042	-1.59861	-1.36712	-1.80618	-1.52436	-1.29288	0.28182	0.5133	0.23148
chr7	100495998	100496007	-	chr7	100495382	100496079	5UTR	Ucp2	0.48717	0.41492	0.47538	0.29649	1.27209	0.68275	0.57748	0.19143	0.02956	0.57337	-1.23266	-0.41833	-0.2083	-0.16188	0.38194	-1.4241	-0.60977	-0.39973	0.54382	-1.26222	-0.44789	-0.23786	-1.80604	-0.99171	-0.78167	0.81433	1.02436	0.21003
chr7	31089942	31089951	-	chr7	31089586	31090138	3UTR	Hpn	0.07673	0.01893	0.07243	0.01864	0.30032	0.1315	0.23101	0.59521	0.03675	0.59891	-1.20645	-0.4009	-0.92777	-0.55846	0.0037	-1.80166	-0.99611	-1.52297	0.56216	-1.2432	-0.43764	-0.96451	-1.80536	-0.99981	-1.52668	0.80556	0.27869	-0.52687
chr13	98832684	98832693	-	chr13	98832427	98832829	transcript	Gm34995	0.09708	0.15024	0.05282	0.10012	0.58489	0.20339	0.22889	-0.35371	0.37956	-0.02274	-1.82765	-0.63751	-0.7561	0.73327	0.33097	-1.47393	-0.28379	-0.40238	-0.4023	-2.20721	-1.01707	-1.13566	-1.8049	-0.61476	-0.73335	1.19014	1.07155	-0.11859
chr2	93192775	93192784	+	chr2	93192626	93192980	5UTR	Trp53i11	0.16038	0.14009	0.05141	0.09507	0.5667	0.27404	0.24888	0.1198	0.8058	0.42758	-1.37614	-0.53244	-0.43035	0.686	0.30778	-1.49594	-0.65224	-0.55015	-0.37822	-2.18194	-1.33824	-1.23615	-1.80371	-0.96002	-0.85793	0.8437	0.94579	0.10209
chr3	101924478	101924487	+	chr3	101923577	101924605	exon	Slc22a15	0.35871	0.32451	0.13641	0.13882	0.71927	0.41025	0.31484	0.11326	0.97362	0.95862	-0.84479	-0.15547	0.14697	0.86036	0.84536	-0.95805	-0.26873	0.03371	-0.015	-1.81841	-1.12909	-0.82665	-1.80341	-1.11409	-0.81165	0.68932	0.99176	0.30244
chr11	67604649	67604658	-	chr11	67604251	67604816	CDS	Gas7	0.038	0.10674	0.02322	0.03828	0.3683	0.11459	0.14752	-0.60386	0.17098	-0.00305	-1.80634	-0.65913	-0.87037	0.77483	0.6008	-1.20249	-0.05527	-0.26651	-0.17403	-1.97732	-0.83011	-1.04134	-1.80329	-0.65608	-0.86732	1.14721	0.93597	-0.21124
chr18	38713464	38713473	+	chr18	38713170	38713787	5UTR	Gm19774	0.13335	0.08883	0.05627	0.04348	0.38635	0.1683	0.1967	0.31403	0.59655	0.72466	-1.07834	-0.20609	-0.35427	0.28252	0.41063	-1.39236	-0.52012	-0.6683	0.12811	-1.67488	-0.80264	-0.95082	-1.80299	-0.93075	-1.07893	0.87224	0.72407	-0.14818
chr3	101700610	101700619	-	chr3	101700062	101701016	NA	NA	0.23637	0.1737	0.12621	0.10952	0.61676	0.33105	0.26557	0.30321	0.58466	0.69823	-1.1047	-0.36331	-0.1221	0.28145	0.39502	-1.40791	-0.66652	-0.42531	0.11358	-1.68935	-0.94796	-0.70676	-1.80293	-1.06154	-0.82033	0.74139	0.98259	0.24121
chr10	8065953	8065962	-	chr10	8065760	8066071	NA	NA	0.19368	0.20788	0.10159	0.11018	0.61888	0.22508	0.22947	-0.06945	0.55604	0.49411	-1.30845	-0.14933	-0.16903	0.62549	0.56356	-1.239	-0.07988	-0.09958	-0.06193	-1.86449	-0.70537	-0.72507	-1.80256	-0.64344	-0.66314	1.15912	1.13942	-0.0197
chr4	150349836	150349845	-	chr4	150349628	150350038	NA	NA	0.11246	0.06976	0.01942	0.04571	0.39333	0.22448	0.12557	0.33382	0.86276	0.56259	-1.23803	-0.62473	-0.08871	0.52893	0.22877	-1.57186	-0.95855	-0.42254	-0.30016	-2.10079	-1.48748	-0.95147	-1.80062	-1.18732	-0.65131	0.6133	1.14932	0.53601
chr11	34031467	34031476	+	chr11	34031130	34032030	transcript	4930469K13Rik	0.1714	0.10575	0.09611	0.08803	0.54057	0.21143	0.18768	0.40953	0.4808	0.54337	-1.25682	-0.2025	-0.08581	0.07127	0.13384	-1.66635	-0.61202	-0.49534	0.06257	-1.73762	-0.68329	-0.56661	-1.80019	-0.74587	-0.62918	1.05433	1.17101	0.11669
chr15	64059857	64059866	+	chr15	64059814	64060752	5UTR	Cyrib	0.23822	0.14063	0.13867	0.07045	0.47888	0.25212	0.23874	0.5013	0.51339	1.01338	-0.78564	-0.05909	-0.00225	0.01209	0.51208	-1.28694	-0.56039	-0.50355	0.49999	-1.29903	-0.57248	-0.51564	-1.79902	-1.07247	-1.01564	0.72655	0.78338	0.05684
chr6	29827446	29827455	+	chr6	29827209	29827836	5UTR	Ahcyl2	0.12132	0.01594	0.04134	0.05234	0.41566	0.11954	0.15021	0.96816	0.66891	0.55637	-1.24209	0.01196	-0.18144	-0.29926	-0.41179	-2.21025	-0.9562	-1.14961	-0.11254	-1.91099	-0.65694	-0.85035	-1.79846	-0.54441	-0.73781	1.25405	1.06064	-0.1934
chr9	111143661	111143670	+	chr9	111143415	111143796	exon	Lrrfip2	0.06154	0.09268	0.05853	0.01801	0.29621	0.22746	0.14995	-0.2629	0.02815	0.47276	-1.32557	-1.04616	-0.64846	0.29104	0.73565	-1.06268	-0.78326	-0.38557	0.44461	-1.35372	-1.07431	-0.67661	-1.79833	-1.51892	-1.12122	0.27941	0.67711	0.3977
chr19	45591930	45591939	+	chr19	45591607	45592249	CDS	Fbxw4	0.18113	0.23205	0.07107	0.08068	0.51391	0.30501	0.1316	-0.24478	0.73616	0.65465	-1.14303	-0.5359	0.28606	0.98094	0.89942	-0.89825	-0.29113	0.53083	-0.08152	-1.87919	-1.27207	-0.4501	-1.79767	-1.19055	-0.36859	0.60712	1.42909	0.82196
chr13	9022795	9022804	-	chr13	9022533	9022963	exon	Gm8782	0.20338	0.32636	0.12335	0.10163	0.58674	0.4307	0.29388	-0.49896	0.45184	0.60355	-1.19411	-0.81866	-0.38302	0.9508	1.10251	-0.69515	-0.3197	0.11594	0.15171	-1.64596	-1.2705	-0.83486	-1.79766	-1.42221	-0.98657	0.37545	0.81109	0.43564
chr1	39714274	39714283	+	chr1	39713766	39714390	CDS	Rfx8	0.12737	0.0965	0.08216	0.03421	0.35229	0.13549	0.23669	0.21641	0.32916	0.78677	-1.0107	-0.05191	-0.57848	0.11275	0.57036	-1.22711	-0.26832	-0.79489	0.45761	-1.33986	-0.38107	-0.90764	-1.79747	-0.83868	-1.36525	0.95879	0.43222	-0.52657
chr8	116627951	116627960	+	chr8	116627828	116628468	NA	NA	0.11801	0.09496	0.01856	0.02213	0.31022	0.10739	0.1071	0.16584	0.91194	0.86699	-0.9302	0.07405	0.07613	0.74609	0.70115	-1.09604	-0.09179	-0.08972	-0.04495	-1.84214	-0.83789	-0.83581	-1.79719	-0.79294	-0.79086	1.00425	1.00633	0.00208
chr18	34856447	34856456	+	chr18	34856263	34856516	transcript	Gm41689	0.25892	0.23753	0.2611	0.19709	0.91813	0.48458	0.4767	0.09014	-0.00888	0.27766	-1.51932	-0.71278	-0.693	-0.09901	0.18752	-1.60945	-0.80291	-0.78314	0.28654	-1.51044	-0.7039	-0.68412	-1.79698	-0.99044	-0.97066	0.80654	0.82631	0.01978
chr14	70883019	70883028	-	chr14	70882896	70883152	transcript	2410012E07Rik	0.15448	0.06612	0.01631	0.02702	0.32715	0.07985	0.14882	0.63318	1.16975	1.03636	-0.76061	0.51466	0.03321	0.53657	0.40318	-1.39379	-0.11851	-0.59997	-0.13339	-1.93036	-0.65509	-1.13654	-1.79697	-0.52169	-1.00315	1.27527	0.79382	-0.48146
chr11	120041852	120041861	+	chr11	120041626	120042138	transcript	Aatk	0.16252	0.05035	0.0708	0.12891	0.68096	0.28918	0.19713	0.82841	0.63757	0.2024	-1.59411	-0.57849	-0.18243	-0.19084	-0.62601	-2.42252	-1.4069	-1.01083	-0.43518	-2.23168	-1.21606	-0.82	-1.79651	-0.78088	-0.38482	1.01562	1.41169	0.39606
chr9	80081216	80081225	-	chr9	80080873	80081338	NA	NA	0.17269	0.12537	0.12486	0.09091	0.54872	0.24312	0.19412	0.28151	0.28486	0.52774	-1.26824	-0.33782	-0.11141	0.00335	0.24624	-1.54974	-0.61932	-0.39291	0.24288	-1.5531	-0.62268	-0.39627	-1.79598	-0.86556	-0.63915	0.93042	1.15683	0.22641
chr8	72815763	72815772	+	chr8	72815686	72816112	CDS	Large1	0.05618	0.04801	0.02969	0.01737	0.29331	0.06419	0.1153	0.08056	0.27945	0.4305	-1.36533	-0.07484	-0.4782	0.19889	0.34993	-1.44589	-0.15541	-0.55876	0.15105	-1.64478	-0.35429	-0.75765	-1.79582	-0.50534	-0.9087	1.29048	0.88713	-0.40336
chr11	83572413	83572422	+	chr11	83572140	83572591	3UTR	Ccl9	0.23812	0.20044	0.04091	0.08753	0.53691	0.25247	0.19178	0.17359	1.29812	0.8706	-0.92522	-0.06098	0.21662	1.12453	0.697	-1.09881	-0.23457	0.04303	-0.42753	-2.22334	-1.3591	-1.0815	-1.79581	-0.93158	-0.65397	0.86423	1.14184	0.2776
chr10	54119568	54119577	+	chr10	54119276	54119684	NA	NA	0.06295	0.05376	0.04059	0.03985	0.3713	0.15008	0.17135	0.08691	0.22135	0.22929	-1.56633	-0.63623	-0.75665	0.13445	0.14239	-1.65324	-0.72314	-0.84356	0.00794	-1.78769	-0.85758	-0.97801	-1.79563	-0.86552	-0.98595	0.93011	0.80968	-0.12042
chr7	127296242	127296251	-	chr7	127295853	127296833	5UTR	Itgal	0.25422	0.20878	0.16541	0.12605	0.6703	0.41526	0.29554	0.20157	0.42441	0.66156	-1.13358	-0.54808	-0.16166	0.22284	0.45999	-1.33515	-0.74965	-0.36324	0.23715	-1.55799	-0.97249	-0.58607	-1.79514	-1.20964	-0.82323	0.5855	0.97191	0.38641
chr6	87916072	87916081	-	chr6	87915971	87916277	exon	Hmces	0.28675	0.17198	0.07837	0.06664	0.46401	0.21147	0.25516	0.51712	1.14219	1.24372	-0.55115	0.31758	0.12487	0.62507	0.7266	-1.06826	-0.19954	-0.39225	0.10152	-1.69334	-0.82461	-1.01732	-1.79486	-0.92614	-1.11885	0.86873	0.67602	-0.19271
chr2	157063648	157063657	+	chr2	157063118	157063796	NA	NA	0.11584	0.1487	0.07072	0.10637	0.60117	0.33171	0.28966	-0.20965	0.3488	0.06654	-1.72688	-1.01971	-0.86976	0.55846	0.27619	-1.51723	-0.81006	-0.66011	-0.28226	-2.07568	-1.36851	-1.21856	-1.79342	-1.08625	-0.9363	0.70717	0.85712	0.14995
chr8	13594990	13594999	-	chr8	13594682	13595327	CDS	Rasa3	0.21217	0.29088	0.11065	0.11738	0.63907	0.35841	0.34954	-0.32984	0.58059	0.53397	-1.25893	-0.56292	-0.53437	0.91043	0.8638	-0.9291	-0.23308	-0.20453	-0.04662	-1.83952	-1.14351	-1.11496	-1.7929	-1.09688	-1.06833	0.69602	0.72457	0.02855
chr12	32132020	32132029	-	chr12	32131906	32132328	NA	NA	0.99754	0.38474	0.25904	0.23672	1.05174	0.95536	0.56515	1.18863	1.62777	1.72192	-0.0699	0.05684	0.72747	0.43914	0.5333	-1.25853	-1.13179	-0.46116	0.09415	-1.69767	-1.57093	-0.9003	-1.79182	-1.66508	-0.99445	0.12674	0.79737	0.67063
chr7	78685093	78685102	-	chr7	78684762	78685344	NA	NA	0.14754	0.1321	0.11945	0.05949	0.43732	0.25147	0.14912	0.0952	0.17817	0.65326	-1.13651	-0.51585	-0.0094	0.08297	0.55806	-1.2317	-0.61105	-0.1046	0.47509	-1.31467	-0.69402	-0.18756	-1.78977	-1.16911	-0.66266	0.62066	1.12711	0.50645
chr7	123322563	123322572	-	chr7	123322407	123322999	5UTR	Arhgap17	0.16652	0.10258	0.13911	0.1043	0.59176	0.26861	0.20336	0.40583	0.16022	0.39328	-1.39545	-0.47664	-0.19065	-0.24561	-0.01255	-1.80128	-0.88246	-0.59647	0.23305	-1.55567	-0.63686	-0.35087	-1.78873	-0.86991	-0.58392	0.91882	1.20481	0.28599
chr16	11006111	11006120	+	chr16	11006010	11006607	NA	NA	0.07379	0.13746	0.02075	0.0195	0.29873	0.15783	0.08772	-0.46352	0.54717	0.56294	-1.22565	-0.58508	-0.1149	1.01069	1.02645	-0.76214	-0.12156	0.34862	0.01577	-1.77282	-1.13225	-0.66207	-1.78859	-1.14802	-0.67783	0.64057	1.11076	0.47018
chr5	148495388	148495397	+	chr5	148495140	148495700	3UTR	Ubl3	0.21184	0.0894	0.08589	0.08575	0.52754	0.26009	0.22552	0.737	0.76484	0.76596	-1.02247	-0.21118	-0.06308	0.02784	0.02896	-1.75947	-0.94818	-0.80008	0.00112	-1.78731	-0.97602	-0.82792	-1.78843	-0.97714	-0.82904	0.81129	0.95939	0.1481
chr8	85482018	85482027	+	chr8	85481715	85482774	NA	NA	0.43842	0.21694	0.14977	0.27114	1.16762	0.47589	0.58153	0.77545	1.12624	0.5438	-1.24425	-0.09807	-0.34331	0.3508	-0.23164	-2.0197	-0.87352	-1.11876	-0.58244	-2.37049	-1.22432	-1.46955	-1.78805	-0.64188	-0.88712	1.14618	0.90094	-0.24524
chr1	105787098	105787107	-	chr1	105787000	105787476	5UTR	Tnfrsf11a	0.03279	0.0413	0.03714	0	0.23118	0.10216	0.0531	-0.09354	-0.04857	0.43072	-1.35706	-0.62859	-0.21396	0.04497	0.52426	-1.26352	-0.53504	-0.12042	0.47929	-1.30849	-0.58001	-0.16539	-1.78778	-1.0593	-0.64468	0.72848	1.1431	0.41462
chr5	119321921	119321930	+	chr5	119321475	119322131	NA	NA	0.1616	0.14721	0.06549	0.08345	0.51894	0.35483	0.31605	0.08351	0.67957	0.52585	-1.26104	-0.81167	-0.68138	0.59606	0.44234	-1.34455	-0.89519	-0.76489	-0.15372	-1.94061	-1.49125	-1.36095	-1.78689	-1.33753	-1.20724	0.44936	0.57966	0.13029
chr11	57686283	57686292	+	chr11	57686135	57686469	exon	Galnt10	0.19436	0.094	0.10021	0.06651	0.46034	0.30849	0.1868	0.61647	0.56965	0.84421	-0.9423	-0.48073	0.03829	-0.04682	0.22774	-1.55877	-1.0972	-0.57818	0.27456	-1.51195	-1.05038	-0.53135	-1.78651	-1.32494	-0.80592	0.46157	0.98059	0.51902
chr2	37757189	37757198	+	chr2	37756902	37757379	NA	NA	0.16218	0.16463	0.0657	0.03992	0.3686	0.29069	0.19002	-0.01372	0.68094	0.9345	-0.85198	-0.58607	-0.1487	0.69466	0.94822	-0.83826	-0.57235	-0.13498	0.25356	-1.53292	-1.26701	-0.82964	-1.78648	-1.52057	-1.0832	0.26591	0.70328	0.43737
chr17	47221280	47221289	-	chr17	47221095	47221820	NA	NA	0.10463	0.01614	0.05633	0.05646	0.4253	0.20411	0.10043	0.84929	0.40137	0.40012	-1.38536	-0.58516	0.03079	-0.44792	-0.44917	-2.23465	-1.43444	-0.8185	-0.00124	-1.78673	-0.98652	-0.37057	-1.78549	-0.98528	-0.36933	0.80021	1.41616	0.61595
chr2	164943084	164943093	-	chr2	164942740	164943364	5UTR	Mmp9	0.09515	0.02067	0.03582	0.04558	0.38763	0.10873	0.13933	0.72081	0.54215	0.43776	-1.34724	-0.0999	-0.30248	-0.17866	-0.28304	-2.06804	-0.82071	-1.02329	-0.10439	-1.88939	-0.64205	-0.84463	-1.785	-0.53766	-0.74024	1.24734	1.04476	-0.20258
chr11	63051206	63051215	-	chr11	63051053	63051430	exon	Gm36874	0.08505	0.04737	0.02183	0.04068	0.37062	0.11704	0.0686	0.34035	0.62726	0.41016	-1.37445	-0.23685	0.13883	0.28691	0.06981	-1.7148	-0.5772	-0.20152	-0.21709	-2.00171	-0.86411	-0.48842	-1.78462	-0.64701	-0.27133	1.1376	1.51328	0.37568
chr11	72458263	72458272	+	chr11	72457984	72459000	CDS	Spns2	0.13862	0.14503	0.0813	0.09743	0.5656	0.17342	0.17402	-0.03918	0.40764	0.28082	-1.50261	-0.20093	-0.20416	0.44682	0.32	-1.46344	-0.16176	-0.16499	-0.12682	-1.91026	-0.60857	-0.6118	-1.78344	-0.48176	-0.48499	1.30168	1.29845	-0.00323
chr6	50305244	50305253	-	chr6	50304968	50305497	CDS	Osbpl3	0.19564	0.16631	0.12285	0.19778	0.91091	0.3464	0.29888	0.15389	0.41715	-0.01061	-1.79385	-0.60413	-0.4395	0.26326	-0.1645	-1.94774	-0.75802	-0.59339	-0.42776	-2.21099	-1.02127	-0.85665	-1.78324	-0.59352	-0.42889	1.18972	1.35435	0.16463
chr11	106122926	106122935	-	chr11	106122728	106123102	CDS	Map3k3	0.10302	0.09757	0.02164	0.02065	0.30122	0.12832	0.24954	0.04042	0.76742	0.77979	-1.0034	-0.17409	-0.80136	0.727	0.73937	-1.04382	-0.21451	-0.84177	0.01238	-1.77081	-0.9415	-1.56877	-1.78319	-0.95388	-1.58115	0.82931	0.20204	-0.62727
chr3	68794567	68794576	+	chr3	68794442	68794680	NA	NA	0.10213	0.05069	0.06296	0.02825	0.32725	0.09345	0.07492	0.43819	0.32096	0.68087	-1.10188	0.06522	0.21517	-0.11724	0.24267	-1.54008	-0.37297	-0.22302	0.35991	-1.42284	-0.25574	-0.10578	-1.78275	-0.61565	-0.46569	1.1671	1.31706	0.14995
chr12	103341389	103341398	-	chr12	103341212	103341581	CDS	Asb2	0.05553	0.06596	0.01483	0.07066	0.47308	0.11522	0.17273	-0.09712	0.45746	-0.13883	-1.92134	-0.4839	-0.83389	0.55458	-0.04171	-1.82422	-0.38678	-0.73677	-0.59629	-2.3788	-0.94136	-1.29135	-1.78251	-0.34506	-0.69505	1.43744	1.08746	-0.34999
chr13	24791596	24791605	-	chr13	24791348	24791760	NA	NA	0.12871	0.06251	0.06054	0.04804	0.39517	0.23045	0.1432	0.50823	0.52647	0.64795	-1.13429	-0.54232	-0.09084	0.01825	0.13972	-1.64252	-1.05055	-0.59907	0.12148	-1.66076	-1.0688	-0.61731	-1.78224	-1.19027	-0.73879	0.59197	1.04345	0.45148
chr19	7226723	7226732	+	chr19	7226419	7227033	3UTR	Naa40	0.09147	0.03742	0.05981	0.04592	0.38784	0.12685	0.19558	0.4962	0.26964	0.40595	-1.37617	-0.25157	-0.64208	-0.22657	-0.09025	-1.87238	-0.74777	-1.13828	0.13631	-1.64581	-0.52121	-0.91171	-1.78212	-0.65752	-1.04803	1.1246	0.7341	-0.39051
chr13	34691391	34691400	+	chr13	34691013	34691508	NA	NA	0.03779	0.03772	0	0	0.22989	0.05395	0.15715	0.00077	0.48641	0.48641	-1.29564	-0.16657	-0.92901	0.48565	0.48565	-1.29641	-0.16734	-0.92977	0	-1.78205	-0.65298	-1.41542	-1.78205	-0.65298	-1.41542	1.12907	0.36663	-0.76244
chr10	8065892	8065901	-	chr10	8065760	8066071	NA	NA	0.19539	0.12375	0.07573	0.07317	0.4811	0.22457	0.34399	0.40993	0.7689	0.79079	-0.99018	-0.13848	-0.59746	0.35896	0.38086	-1.40011	-0.54841	-1.00739	0.02189	-1.75907	-0.90738	-1.36636	-1.78097	-0.92927	-1.38825	0.8517	0.39272	-0.45898
chr2	166446840	166446849	-	chr2	166446347	166447244	exon	5031425F14Rik	0.0937	0.01508	0.02813	0.0208	0.30086	0.15561	0.10689	0.78166	0.61898	0.70809	-1.07191	-0.41077	-0.09785	-0.16268	-0.07357	-1.85357	-1.19243	-0.87951	0.08911	-1.69089	-1.02975	-0.71683	-1.77999	-1.11886	-0.80594	0.66113	0.97405	0.31292
chr11	95293238	95293247	-	chr11	95293073	95293331	transcript	Kat7	0.17332	0.11369	0.09426	0.0448	0.3829	0.25259	0.14781	0.36375	0.50528	0.94431	-0.83453	-0.37435	0.14455	0.14153	0.58056	-1.19828	-0.7381	-0.2192	0.43904	-1.3398	-0.87963	-0.36072	-1.77884	-1.31867	-0.79976	0.46017	0.97908	0.51891
chr7	132686655	132686664	+	chr7	132686100	132687109	NA	NA	0.96946	0.53443	0.48067	0.30575	1.27795	0.91201	0.65253	0.75871	0.88767	1.41103	-0.36739	0.0801	0.51035	0.12896	0.65233	-1.12609	-0.67861	-0.24836	0.52336	-1.25506	-0.80757	-0.37732	-1.77842	-1.33093	-0.90068	0.44749	0.87774	0.43025
chr9	57978146	57978155	+	chr9	57978039	57978500	NA	NA	0.08666	0.02633	0.05418	0.03276	0.34109	0.0885	0.173	0.58528	0.28549	0.51033	-1.26687	-0.0146	-0.56292	-0.29979	-0.07495	-1.85215	-0.59988	-1.1482	0.22484	-1.55236	-0.30009	-0.84841	-1.7772	-0.52493	-1.07325	1.25227	0.70395	-0.54832
chr3	103378177	103378186	+	chr3	103378050	103378420	NA	NA	0.30372	0.20867	0.15441	0.09955	0.56982	0.23977	0.41694	0.39372	0.67849	1.03809	-0.73868	0.25273	-0.3612	0.28476	0.64437	-1.1324	-0.141	-0.75492	0.35961	-1.41716	-0.42576	-1.03969	-1.77677	-0.78537	-1.39929	0.9914	0.37748	-0.61393
chr6	134065184	134065193	+	chr6	134064927	134065413	NA	NA	0.21449	0.21557	0.13822	0.14814	0.73602	0.44383	0.33716	-0.00504	0.40935	0.34906	-1.42719	-0.80143	-0.48267	0.41439	0.3541	-1.42215	-0.79639	-0.47763	-0.06029	-1.83654	-1.21078	-0.89202	-1.77625	-1.15049	-0.83173	0.62576	0.94452	0.31876
chr5	123129213	123129222	-	chr5	123128962	123129243	transcript	Rhof	0.69847	0.47368	0.34263	0.25191	1.09102	0.57887	0.71985	0.4811	0.85957	1.19537	-0.58033	0.23595	-0.03839	0.37848	0.71427	-1.06143	-0.24515	-0.51949	0.3358	-1.43991	-0.62363	-0.89797	-1.7757	-0.95942	-1.23377	0.81628	0.54194	-0.27434
chr18	12224105	12224114	+	chr18	12223991	12224894	NA	NA	0.10014	0.16505	0.09016	0.08591	0.52257	0.27165	0.19817	-0.41567	0.07604	0.10968	-1.6659	-0.9125	-0.58909	0.49171	0.52534	-1.25023	-0.49683	-0.17342	0.03364	-1.74193	-0.98853	-0.66513	-1.77557	-1.02217	-0.69876	0.7534	1.07681	0.32341
chr18	34856359	34856368	-	chr18	34856263	34856516	transcript	Gm41689	0.51919	0.23009	0.32234	0.30144	1.25985	0.67524	0.56031	0.91942	0.55829	0.63255	-1.14234	-0.32698	-0.0936	-0.36112	-0.28686	-2.06176	-1.2464	-1.01302	0.07426	-1.70063	-0.88527	-0.6519	-1.77489	-0.95953	-0.72615	0.81536	1.04874	0.23338
chr17	32635039	32635048	-	chr17	32634686	32635450	CDS	Cyp4f37	0.37284	0.22177	0.26392	0.14972	0.73949	0.41991	0.36713	0.56368	0.38306	0.937	-0.8359	-0.13852	0.01775	-0.18063	0.37331	-1.39958	-0.7022	-0.54594	0.55394	-1.21895	-0.52157	-0.36531	-1.77289	-1.07551	-0.91925	0.69738	0.85364	0.15626
chr6	97016253	97016262	-	chr6	97015934	97016479	5UTR	Tafa4	0.09549	0	0.07516	0.03304	0.34031	0.12475	0.15376	1.00946	0.1635	0.5759	-1.19553	-0.20691	-0.38637	-0.84595	-0.43355	-2.20499	-1.21637	-1.39583	0.4124	-1.35904	-0.37041	-0.54988	-1.77144	-0.78281	-0.96228	0.98862	0.80916	-0.17947
chr6	97458123	97458132	-	chr6	97457977	97458364	CDS	Frmd4b	0.08187	0.08894	0.02311	0.08065	0.50211	0.28456	0.14138	-0.05678	0.58562	0.01003	-1.75962	-1.10492	-0.41996	0.6424	0.06681	-1.70284	-1.04813	-0.36318	-0.57559	-2.34524	-1.69053	-1.00558	-1.76965	-1.11494	-0.42999	0.65471	1.33966	0.68495
chr15	83008984	83008993	-	chr15	83008918	83009925	transcript	Nfam1	0.11928	0.05422	0.01995	0	0.22697	0.0977	0.16282	0.52427	0.90288	1.17987	-0.58912	0.15371	-0.26772	0.37861	0.65561	-1.11339	-0.37056	-0.79199	0.277	-1.492	-0.74917	-1.1706	-1.769	-1.02617	-1.4476	0.74283	0.3214	-0.42143
chr19	45308150	45308159	+	chr19	45307969	45308259	NA	NA	0.16073	0.07177	0.05004	0.08987	0.53321	0.18294	0.15593	0.61903	0.82141	0.46974	-1.29914	-0.12049	0.02742	0.20239	-0.14929	-1.91817	-0.73952	-0.59161	-0.35168	-2.12055	-0.9419	-0.794	-1.76888	-0.59023	-0.44232	1.17865	1.32656	0.14791
chr2	126491659	126491668	-	chr2	126491465	126491807	transcript	Atp8b4	0.13251	0.15848	0.0726	0.09669	0.55638	0.14861	0.1816	-0.15643	0.44261	0.24805	-1.52067	-0.09896	-0.28272	0.59905	0.40448	-1.36424	0.05747	-0.12629	-0.19457	-1.96329	-0.54157	-0.72533	-1.76872	-0.34701	-0.53076	1.42171	1.23795	-0.18376
chr8	14996279	14996288	+	chr8	14996007	14996382	exon	Gm35149	0.12803	0.06349	0.01907	0.02367	0.30746	0.0741	0.13531	0.49483	0.97198	0.91457	-0.85378	0.40091	-0.04649	0.47715	0.41974	-1.34861	-0.09392	-0.54132	-0.05741	-1.82575	-0.57106	-1.01847	-1.76835	-0.51366	-0.96106	1.25469	0.80728	-0.44741
chrX	101770430	101770439	+	chrX	101770325	101770661	exon	Tpt1-ps6	0.09472	0.04223	0	0.04863	0.39241	0.09693	0.1848	0.46947	1.00359	0.40335	-1.36476	-0.01677	-0.56237	0.53413	-0.06611	-1.83422	-0.48624	-1.03183	-0.60024	-2.36835	-1.02037	-1.56596	-1.76811	-0.42013	-0.96572	1.34798	0.80239	-0.54559
chr14	30607878	30607887	+	chr14	30607609	30608046	CDS	Prkcd	0.21006	0.22175	0.10605	0.11128	0.60573	0.3579	0.32473	-0.05438	0.60338	0.56619	-1.20177	-0.57126	-0.46134	0.65776	0.62058	-1.14739	-0.51688	-0.40696	-0.03719	-1.80515	-1.17464	-1.06472	-1.76796	-1.13745	-1.02753	0.63051	0.74043	0.10992
chr14	20785394	20785403	-	chr14	20785217	20786316	5UTR	Camk2g	0.31504	0.19618	0.1319	0.23063	1.01214	0.47943	0.23857	0.49493	0.85584	0.33322	-1.43466	-0.48712	0.29838	0.36091	-0.16172	-1.9296	-0.98206	-0.19655	-0.52263	-2.29051	-1.34297	-0.55746	-1.76788	-0.82034	-0.03484	0.94754	1.73305	0.7855
chr3	27689628	27689637	+	chr3	27689282	27689791	NA	NA	0.09944	0.03191	0.0721	0.02588	0.31467	0.11233	0.12851	0.61849	0.21953	0.68915	-1.07807	-0.09295	-0.20174	-0.39897	0.07066	-1.69656	-0.71145	-0.82024	0.46963	-1.2976	-0.31248	-0.42127	-1.76722	-0.7821	-0.89089	0.98512	0.87633	-0.10879
chr6	13601828	13601837	+	chr6	13601517	13601967	CDS	Tmem168	0.16284	0.1277	0.06408	0.09838	0.5613	0.27039	0.1834	0.21204	0.69934	0.41644	-1.35043	-0.5042	-0.11099	0.4873	0.2044	-1.56247	-0.71624	-0.32303	-0.2829	-2.04977	-1.20354	-0.81033	-1.76687	-0.92064	-0.52743	0.84623	1.23944	0.39321
chr14	63413752	63413761	-	chr14	63413525	63414164	5UTR	Blk	0.04164	0.02415	0.0541	0.05285	0.40634	0.10983	0.11526	0.19877	-0.12657	-0.11436	-1.88119	-0.5867	-0.62458	-0.32534	-0.31313	-2.07996	-0.78547	-0.82335	0.01221	-1.75462	-0.46013	-0.49801	-1.76683	-0.47234	-0.51022	1.29449	1.25661	-0.03788
chr9	61054637	61054646	-	chr9	61054432	61054799	exon	Gm33699	0.26393	0.16677	0.11069	0.1702	0.80543	0.41867	0.24786	0.45652	0.80548	0.43769	-1.32873	-0.51805	0.06622	0.34896	-0.01883	-1.78525	-0.97457	-0.3903	-0.36779	-2.13421	-1.32353	-0.73926	-1.76642	-0.95574	-0.37147	0.81068	1.39495	0.58427
chr8	121792422	121792431	-	chr8	121792117	121792565	transcript	Jph3	0.11816	0.07244	0.07873	0.09511	0.54969	0.19156	0.17363	0.34968	0.29625	0.16572	-1.60007	-0.4282	-0.33474	-0.05344	-0.18396	-1.94976	-0.77789	-0.68442	-0.13053	-1.89632	-0.72445	-0.63098	-1.76579	-0.59392	-0.50046	1.17187	1.26534	0.09347
chr9	62488962	62488971	+	chr9	62488783	62489112	CDS	Coro2b	0.22066	0.18149	0.16345	0.13435	0.68259	0.43031	0.39939	0.19163	0.28925	0.46211	-1.30268	-0.73617	-0.64852	0.09762	0.27048	-1.49431	-0.9278	-0.84015	0.17287	-1.59192	-1.02542	-0.93777	-1.76479	-1.19828	-1.11063	0.56651	0.65416	0.08765
chr10	60931998	60932007	-	chr10	60931806	60932443	exon	Gm26947	0.03761	0.0291	0.01513	0.05034	0.39672	0.15186	0.14809	0.09625	0.26966	-0.13296	-1.89663	-0.9003	-0.87803	0.17341	-0.22921	-1.99288	-0.99655	-0.97427	-0.40262	-2.16629	-1.16995	-1.14768	-1.76367	-0.76734	-0.74506	0.99633	1.0186	0.02227
chr2	11203485	11203494	+	chr2	11203239	11203736	NA	NA	0.16428	0.14161	0.07562	0.07189	0.46974	0.27137	0.30378	0.1324	0.6059	0.63793	-1.12534	-0.50001	-0.62255	0.4735	0.50553	-1.25774	-0.63241	-0.75495	0.03203	-1.73124	-1.10591	-1.22845	-1.76327	-1.13795	-1.26048	0.62532	0.50279	-0.12253
chr18	65381986	65381995	-	chr18	65381486	65382148	NA	NA	0.14434	0.08645	0.06997	0.11182	0.60511	0.19593	0.25934	0.40094	0.5389	0.2114	-1.5515	-0.28241	-0.56754	0.13797	-0.18954	-1.95244	-0.68335	-0.96848	-0.3275	-2.09041	-0.82132	-1.10645	-1.7629	-0.49381	-0.77894	1.26909	0.98396	-0.28513
chr2	60172938	60172947	+	chr2	60172336	60173032	NA	NA	0.06934	0.06534	0.06176	0.03428	0.34167	0.12695	0.11433	0.03571	0.06845	0.34798	-1.41398	-0.43527	-0.35052	0.03273	0.31227	-1.44969	-0.47098	-0.38623	0.27953	-1.48242	-0.50371	-0.41896	-1.76196	-0.78325	-0.6985	0.97871	1.06346	0.08475
chr13	83609360	83609369	-	chr13	83608951	83609816	transcript	Gm52043	0.11521	0.07546	0.05777	0.07044	0.46422	0.19457	0.11072	0.3036	0.46241	0.34692	-1.41481	-0.4635	0.03126	0.15881	0.04332	-1.71841	-0.7671	-0.27234	-0.11549	-1.87722	-0.92591	-0.43115	-1.76173	-0.81042	-0.31566	0.95131	1.44607	0.49476
chr11	72946543	72946552	-	chr11	72945706	72947024	exon	Gm34793	0.20798	0.19724	0.09398	0.0873	0.52139	0.22743	0.22742	0.0522	0.68315	0.73528	-1.02644	-0.08998	-0.08993	0.63095	0.68308	-1.07864	-0.14218	-0.14214	0.05213	-1.70959	-0.77313	-0.77308	-1.76172	-0.82526	-0.82521	0.93646	0.93651	4e-05
chr7	143473732	143473741	+	chr7	143473465	143473871	5UTR	Slc22a18	0.42342	0.13672	0.09022	0.20257	0.91178	0.37957	0.28692	1.16433	1.48865	0.80244	-0.95857	0.12769	0.4416	0.32432	-0.36188	-2.1229	-1.03663	-0.72273	-0.6862	-2.44722	-1.36095	-1.04705	-1.76101	-0.67475	-0.36085	1.08626	1.40017	0.3139
chr4	133707055	133707064	+	chr4	133706946	133707276	transcript	Arid1a	0.30561	0.30499	0.24045	0.11396	0.61103	0.38438	0.30086	0.00224	0.25663	0.94146	-0.8187	-0.25942	0.01724	0.25439	0.93922	-0.82094	-0.26165	0.015	0.68483	-1.07533	-0.51604	-0.23939	-1.76016	-1.20087	-0.92421	0.55929	0.83594	0.27666
chr17	29111481	29111490	+	chr17	29111327	29112029	NA	NA	0.25403	0.25606	0.12266	0.13429	0.6796	0.39845	0.44292	-0.00838	0.68315	0.6078	-1.15181	-0.50046	-0.62513	0.69154	0.61619	-1.14342	-0.49208	-0.61675	-0.07535	-1.83496	-1.18361	-1.30828	-1.75961	-1.10826	-1.23293	0.65134	0.52668	-0.12467
chr14	31670048	31670057	+	chr14	31669202	31670328	transcript	Btd	0.2753	0.16579	0.08618	0.12073	0.63364	0.29064	0.32513	0.50704	1.03433	0.78157	-0.97795	-0.05868	-0.18249	0.52729	0.27453	-1.48499	-0.56571	-0.68952	-0.25276	-2.01228	-1.09301	-1.21682	-1.75952	-0.84024	-0.96406	0.91927	0.79546	-0.12381
chr16	10436427	10436436	+	chr16	10436147	10436590	NA	NA	0.09072	0.01963	0.02318	0.02296	0.3026	0.08496	0.13668	0.69978	0.65549	0.6582	-1.1013	0.04564	-0.32016	-0.04429	-0.04158	-1.80108	-0.65414	-1.01994	0.00271	-1.75679	-0.60985	-0.97565	-1.7595	-0.61256	-0.97836	1.14694	0.78114	-0.3658
chr11	113334697	113334706	-	chr11	113334461	113335155	NA	NA	0.08119	0.02831	0.05573	0.03424	0.34065	0.1467	0.0779	0.51749	0.22621	0.44932	-1.30971	-0.45776	0.02731	-0.29128	-0.06817	-1.8272	-0.97525	-0.49018	0.22311	-1.53591	-0.68396	-0.1989	-1.75903	-0.90708	-0.42201	0.85195	1.33702	0.48507
chr9	96899933	96899942	+	chr9	96899781	96900359	transcript	Gm51657	0.05866	0.04065	0.01431	0.08052	0.49727	0.1296	0.12134	0.18079	0.49419	-0.19277	-1.95174	-0.54985	-0.49561	0.3134	-0.37357	-2.13254	-0.73064	-0.6764	-0.68696	-2.44593	-1.04404	-0.9898	-1.75897	-0.35707	-0.30283	1.40189	1.45614	0.05424
chr14	52451287	52451296	+	chr14	52450868	52451503	CDS	Olfr1509	0.17423	0.12537	0.07734	0.07278	0.47107	0.21247	0.18767	0.28981	0.64585	0.68471	-1.07425	-0.19211	-0.07047	0.35604	0.3949	-1.36406	-0.48191	-0.36028	0.03886	-1.7201	-0.83796	-0.71632	-1.75896	-0.87681	-0.75518	0.88215	1.00378	0.12164
chr16	11006286	11006295	-	chr16	11006010	11006607	NA	NA	0.07907	0.05056	0.02306	0.02918	0.32349	0.13807	0.17401	0.25928	0.56311	0.48975	-1.26917	-0.42268	-0.63019	0.30384	0.23047	-1.52844	-0.68195	-0.88947	-0.07337	-1.83228	-0.98579	-1.19331	-1.75891	-0.91242	-1.11994	0.84649	0.63897	-0.20752
chr2	75775402	75775411	-	chr2	75775266	75775509	transcript	Gm34657	0.12266	0.12756	0.05687	0.08404	0.50898	0.14663	0.24105	-0.03223	0.5214	0.28287	-1.47561	-0.15122	-0.62836	0.55363	0.3151	-1.44338	-0.11899	-0.59613	-0.23853	-1.99701	-0.67262	-1.14976	-1.75848	-0.43409	-0.91123	1.32439	0.84726	-0.47714
chr15	55113653	55113662	+	chr15	55111743	55113755	exon	Gm9920	0.28159	0.18921	0.17131	0.13355	0.67548	0.4503	0.33446	0.40697	0.50108	0.72235	-1.03423	-0.53495	-0.18988	0.09411	0.31538	-1.44121	-0.94192	-0.59686	0.22127	-1.53531	-1.03603	-0.69096	-1.75658	-1.2573	-0.91223	0.49929	0.84435	0.34506
chr6	134247545	134247554	-	chr6	134247131	134247726	transcript	Gm17089	0.24543	0.17944	0.13257	0.10785	0.58809	0.35134	0.2247	0.31163	0.58263	0.74911	-1.00631	-0.39154	0.09085	0.27099	0.43747	-1.31795	-0.70317	-0.22079	0.16648	-1.58894	-0.97417	-0.49178	-1.75542	-1.14065	-0.65826	0.61477	1.09716	0.48239
chr11	69931121	69931130	+	chr11	69931023	69931383	NA	NA	0.18659	0.19529	0.06196	0.10861	0.59042	0.43632	0.34573	-0.04401	0.84626	0.46926	-1.28566	-0.91779	-0.64769	0.89028	0.51328	-1.24165	-0.87378	-0.60368	-0.377	-2.13192	-1.76406	-1.49395	-1.75492	-1.38706	-1.11695	0.36787	0.63797	0.27011
chr14	69415131	69415140	-	chr14	69414993	69415272	5UTR	Gm21451	0.08422	0.03857	0.01583	0.06058	0.42817	0.19281	0.12934	0.42621	0.69713	0.205	-1.54953	-0.68567	-0.32517	0.27092	-0.22121	-1.97574	-1.11188	-0.75138	-0.49213	-2.24666	-1.3828	-1.0223	-1.75453	-0.89067	-0.53017	0.86386	1.22435	0.3605
chr4	54714806	54714815	-	chr4	54714566	54715356	NA	NA	0.2393	0.16187	0.01525	0.08835	0.52173	0.26063	0.23416	0.38108	1.60697	0.86922	-0.88498	-0.08943	0.0224	1.22589	0.48813	-1.26606	-0.47051	-0.35868	-0.73776	-2.49195	-1.6964	-1.58457	-1.7542	-0.95864	-0.84681	0.79555	0.90739	0.11183
chr15	86364027	86364036	-	chr15	86363867	86364259	transcript	Tbc1d22a	0.06634	0.02058	0.03653	0.03694	0.34825	0.07898	0.10654	0.48388	0.29624	0.29172	-1.4623	-0.10931	-0.32231	-0.18764	-0.19216	-1.94618	-0.59319	-0.80619	-0.00452	-1.75854	-0.40555	-0.61855	-1.75402	-0.40103	-0.61403	1.35299	1.13999	-0.213
chr13	106639233	106639242	-	chr13	106638864	106639393	NA	NA	0.20015	0.07345	0.02925	0.04926	0.38978	0.19935	0.11868	0.81189	1.25327	1.03663	-0.71732	0.00393	0.4674	0.44137	0.22473	-1.52921	-0.80797	-0.3445	-0.21664	-1.97059	-1.24934	-0.78587	-1.75395	-1.0327	-0.56923	0.72124	1.18472	0.46347
chr3	82358104	82358113	-	chr3	82357681	82358488	5UTR	Map9	0.63506	0.35222	0.19945	0.18373	0.84285	0.68768	0.48303	0.70797	1.31219	1.39155	-0.36167	-0.10051	0.33726	0.60422	0.68358	-1.06964	-0.80848	-0.37071	0.07936	-1.67386	-1.4127	-0.97493	-1.75322	-1.49206	-1.05429	0.26116	0.69893	0.43777
chr6	32158494	32158503	-	chr6	32158195	32158855	CDS	Plxna4	0.27522	0.16404	0.14397	0.12197	0.63439	0.19605	0.32284	0.51647	0.63316	0.77296	-0.97975	0.34791	-0.1749	0.1167	0.25649	-1.49621	-0.16855	-0.69137	0.13979	-1.61291	-0.28525	-0.80806	-1.75271	-0.42504	-0.94786	1.32766	0.80485	-0.52281
chr17	87299213	87299222	-	chr17	87299047	87299328	exon	Gm52284	0.16017	0.10087	0.08483	0.08537	0.51086	0.21168	0.22421	0.38285	0.50661	0.50226	-1.24999	-0.26599	-0.3239	0.12376	0.11941	-1.63284	-0.64884	-0.70675	-0.00434	-1.75659	-0.7726	-0.83051	-1.75225	-0.76825	-0.82616	0.984	0.92609	-0.05791
chr1	183979848	183979857	+	chr1	183979704	183980439	NA	NA	0.12012	0.04585	0.02027	0.01414	0.27066	0.15881	0.14443	0.61365	0.9045	0.98387	-0.76744	-0.23938	-0.15497	0.29086	0.37023	-1.38108	-0.85302	-0.76862	0.07937	-1.67194	-1.14388	-1.05948	-1.75131	-1.22325	-1.13885	0.52806	0.61246	0.0844
chr3	136326067	136326076	+	chr3	136325888	136326274	transcript	Bank1	0.11295	0.06054	0.06354	0.0565	0.41325	0.17417	0.16542	0.42071	0.39302	0.45887	-1.29238	-0.37347	-0.32566	-0.02769	0.03815	-1.7131	-0.79418	-0.74637	0.06585	-1.6854	-0.76649	-0.71867	-1.75125	-0.83233	-0.78452	0.91892	0.96673	0.04781
chr15	55196553	55196562	+	chr15	55196420	55196888	transcript	Deptor	0.06441	0.07341	0.07107	0.01446	0.27171	0.10037	0.09058	-0.0796	-0.05932	0.54545	-1.20575	-0.29472	-0.22026	0.02028	0.62505	-1.12615	-0.21512	-0.14066	0.60478	-1.14642	-0.2354	-0.16094	-1.7512	-0.84018	-0.76571	0.91103	0.98549	0.07446
chr6	82822222	82822231	+	chr6	82821747	82822282	NA	NA	0.1206	0.17749	0.09593	0.05799	0.41783	0.1127	0.21224	-0.3389	0.17596	0.49698	-1.25304	0.05405	-0.51251	0.51486	0.83588	-0.91414	0.39294	-0.17361	0.32102	-1.429	-0.12192	-0.68847	-1.75002	-0.44293	-1.00949	1.30709	0.74053	-0.56656
chr15	101262848	101262857	-	chr15	101262514	101262916	5UTR	Nr4a1	0.09961	0.09638	0.07549	0.06126	0.42881	0.156	0.24646	0.02424	0.19169	0.31801	-1.43196	-0.36835	-0.81353	0.16745	0.29377	-1.4562	-0.39259	-0.83777	0.12632	-1.62365	-0.56004	-1.00522	-1.74997	-0.68636	-1.13154	1.06361	0.61843	-0.44517
chr13	95685868	95685877	+	chr13	95685753	95686070	exon	Gm48745	0.1113	0.16262	0.05777	0.11604	0.61238	0.23414	0.15907	-0.32155	0.43523	-0.03289	-1.78147	-0.67592	-0.30147	0.75678	0.28866	-1.45992	-0.35437	0.02008	-0.46812	-2.21669	-1.11115	-0.7367	-1.74857	-0.64303	-0.26858	1.10554	1.47999	0.37445
chr12	113430454	113430463	-	chr12	113430370	113430750	CDS	Ighd4-1	0.01913	0.00791	0.03587	0.0333	0.33392	0.15165	0.11293	0.15034	-0.19868	-0.1699	-1.91702	-1.11691	-0.86972	-0.34901	-0.32023	-2.06735	-1.26724	-1.02005	0.02878	-1.71834	-0.91823	-0.67104	-1.74712	-0.94701	-0.69982	0.80011	1.0473	0.24719
chr5	137076377	137076386	-	chr5	137076176	137076492	NA	NA	0.12734	0.09557	0.04026	0.04946	0.38802	0.18364	0.24022	0.22326	0.72018	0.62473	-1.12195	-0.32662	-0.59398	0.49692	0.40147	-1.34521	-0.54988	-0.81724	-0.09545	-1.84213	-1.0468	-1.31416	-1.74668	-0.95135	-1.21872	0.79533	0.52796	-0.26736
chr7	72299897	72299906	-	chr7	72299784	72300042	5UTR	Mctp2	0.03326	0.02013	0	0.00756	0.2472	0.16433	0.08045	0.15678	0.43605	0.32473	-1.42106	-1.02	-0.45427	0.27927	0.16796	-1.57784	-1.17678	-0.61104	-0.11131	-1.85711	-1.45605	-0.89032	-1.7458	-1.34473	-0.779	0.40106	0.96679	0.56573
chr8	122022456	122022465	-	chr8	122022168	122022593	CDS	Banp	0.11878	0.0661	0.0732	0.02795	0.31538	0.19359	0.10206	0.40983	0.34733	0.80181	-0.94326	-0.43421	0.11792	-0.06251	0.39198	-1.3531	-0.84404	-0.29191	0.45449	-1.29059	-0.78154	-0.2294	-1.74508	-1.23602	-0.68389	0.50905	1.06119	0.55213
chr12	70999717	70999726	+	chr12	70999151	70999998	transcript	Psma3	0.40509	0.22194	0.29243	0.16812	0.78466	0.4766	0.55894	0.65923	0.36888	0.92842	-0.81569	-0.19309	-0.38748	-0.29035	0.26919	-1.47492	-0.85232	-1.04671	0.55954	-1.18458	-0.56197	-0.75636	-1.74411	-1.12151	-1.3159	0.6226	0.42821	-0.19439
chr17	29395628	29395637	-	chr17	29395314	29395758	NA	NA	0.13742	0.16032	0.17815	0.08893	0.51902	0.32133	0.32598	-0.13599	-0.23366	0.33881	-1.40445	-0.84305	-0.85911	-0.09766	0.4748	-1.26846	-0.70706	-0.72312	0.57246	-1.1708	-0.6094	-0.62545	-1.74326	-1.18186	-1.19792	0.5614	0.54534	-0.01605
chr8	128506116	128506125	-	chr8	128505790	128506257	transcript	Nrp1	0.10833	0.09663	0.00703	0.05656	0.41061	0.22701	0.1837	0.08583	1.00014	0.42576	-1.31739	-0.66525	-0.45633	0.91432	0.33993	-1.40322	-0.75108	-0.54216	-0.57438	-2.31753	-1.66539	-1.45648	-1.74315	-1.09101	-0.88209	0.65214	0.86106	0.20892
chr11	70084808	70084817	-	chr11	70084505	70084997	transcript	Gm32946	0.08348	0.0416	0.03037	0.0244	0.30292	0.15174	0.07355	0.38767	0.51215	0.58298	-1.16007	-0.46891	0.08294	0.12448	0.1953	-1.54774	-0.85659	-0.30473	0.07082	-1.67222	-0.98106	-0.42921	-1.74304	-1.05189	-0.50003	0.69116	1.24301	0.55186
chr13	109239450	109239459	-	chr13	109239247	109239608	NA	NA	0.47198	0.30411	0.22401	0.23999	1.02405	0.63299	0.2693	0.50732	0.83118	0.7605	-0.98185	-0.36104	0.63923	0.32387	0.25319	-1.48916	-0.86836	0.13192	-0.07068	-1.81303	-1.19223	-0.19195	-1.74235	-1.12155	-0.12127	0.6208	1.62108	1.00028
chr14	66199954	66199963	+	chr14	66199308	66200365	NA	NA	0.5484	0.43225	0.30341	0.26	1.09099	0.60308	0.62777	0.2876	0.6925	0.85927	-0.88307	-0.11781	-0.16801	0.4049	0.57167	-1.17067	-0.40541	-0.45561	0.16677	-1.57557	-0.81031	-0.8605	-1.74234	-0.97707	-1.02727	0.76527	0.71507	-0.0502
chr11	83640269	83640278	+	chr11	83639544	83640739	exon	Rpl9-ps1	0.08661	0.1383	0.07384	0.06178	0.42729	0.16287	0.17407	-0.36267	0.10564	0.21305	-1.5279	-0.50757	-0.56908	0.46831	0.57572	-1.16524	-0.1449	-0.20641	0.10741	-1.63354	-0.61321	-0.67472	-1.74095	-0.72062	-0.78213	1.02034	0.95882	-0.06151
chr4	59238727	59238736	+	chr4	59238632	59239034	NA	NA	0.13999	0.10067	0.05116	0.10834	0.58267	0.25152	0.15773	0.26511	0.68786	0.20942	-1.531	-0.56183	-0.10532	0.42276	-0.05568	-1.7961	-0.82693	-0.37043	-0.47844	-2.21886	-1.24969	-0.79318	-1.74042	-0.77125	-0.31475	0.96917	1.42568	0.4565
chr7	105778552	105778561	+	chr7	105778232	105779272	5UTR	Dchs1	0.10406	0.088	0.03824	0.06955	0.45286	0.17507	0.22785	0.12184	0.58187	0.27582	-1.46407	-0.44156	-0.69975	0.46004	0.15398	-1.58591	-0.5634	-0.82159	-0.30605	-2.04595	-1.02344	-1.28163	-1.7399	-0.71739	-0.97557	1.02251	0.76432	-0.25819
chr7	67462017	67462026	+	chr7	67461866	67462341	NA	NA	0.17982	0.15777	0.1261	0.13114	0.65856	0.35401	0.30339	0.12101	0.31475	0.28212	-1.45774	-0.70979	-0.53692	0.19374	0.16111	-1.57875	-0.8308	-0.65792	-0.03263	-1.77249	-1.02454	-0.85167	-1.73986	-0.99191	-0.81904	0.74795	0.92082	0.17287
chr13	74090512	74090521	-	chr13	74090323	74090642	exon	Slc9a3	0.05605	0.03108	0.02971	0.02064	0.28938	0.10374	0.09927	0.26211	0.27797	0.38759	-1.35187	-0.39758	-0.36464	0.01586	0.12548	-1.61398	-0.6597	-0.62675	0.10962	-1.62984	-0.67555	-0.64261	-1.73946	-0.78517	-0.75223	0.95429	0.98723	0.03294
chr7	24208107	24208116	+	chr7	24207465	24208333	transcript	Zfp111	0.14699	0.11644	0.1027	0.04491	0.3703	0.16229	0.18975	0.19535	0.29264	0.79372	-0.94536	-0.08871	-0.23542	0.09729	0.59838	-1.14071	-0.28406	-0.43077	0.50108	-1.238	-0.38135	-0.52806	-1.73909	-0.88244	-1.02915	0.85665	0.70994	-0.14671
chr15	66812712	66812721	-	chr15	66812479	66812849	5UTR	Sla	0.20357	0.19994	0.09891	0.07816	0.48077	0.26979	0.21962	0.01769	0.62464	0.7886	-0.94917	-0.28966	-0.07573	0.60695	0.7709	-0.96686	-0.30735	-0.09342	0.16395	-1.57382	-0.9143	-0.70037	-1.73777	-1.07825	-0.86432	0.65952	0.87344	0.21393
chr17	6967849	6967858	+	chr17	6967703	6968030	NA	NA	0.09291	0.079	0.04346	0.0386	0.34876	0.13769	0.10314	0.11142	0.44264	0.49447	-1.24307	-0.30948	-0.07678	0.33122	0.38306	-1.35448	-0.4209	-0.18819	0.05184	-1.68571	-0.75212	-0.51942	-1.73754	-0.80395	-0.57125	0.93359	1.16629	0.2327
chr9	61681116	61681125	+	chr9	61680779	61681366	NA	NA	0.20507	0.1278	0.07956	0.07469	0.469	0.29559	0.20141	0.4308	0.78418	0.82518	-0.91209	-0.38119	0.01775	0.35337	0.39437	-1.34289	-0.812	-0.41305	0.041	-1.69626	-1.16537	-0.76643	-1.73726	-1.20637	-0.80743	0.53089	0.92984	0.39894
chr5	20681348	20681357	-	chr5	20680942	20681530	exon	Gm52763	0.0946	0.07317	0.02083	0.03914	0.35036	0.13474	0.14954	0.17377	0.7146	0.50159	-1.2353	-0.27804	-0.3684	0.54083	0.32782	-1.40907	-0.45181	-0.54217	-0.21301	-1.9499	-0.99265	-1.083	-1.73689	-0.77963	-0.86999	0.95726	0.8669	-0.09035
chr15	78720833	78720842	+	chr15	78720513	78720879	NA	NA	0.33851	0.2296	0.15116	0.21237	0.92735	0.33838	0.26449	0.41824	0.81837	0.49712	-1.23919	0.00043	0.27063	0.40013	0.07887	-1.65743	-0.41781	-0.14761	-0.32126	-2.05756	-0.81794	-0.54774	-1.73631	-0.49668	-0.22649	1.23962	1.50982	0.2702
chr17	86447321	86447330	+	chr17	86447171	86447481	NA	NA	0.25727	0.15522	0.10333	0.11155	0.59123	0.39717	0.32623	0.49474	0.83117	0.77236	-0.96351	-0.48335	-0.25843	0.33643	0.27762	-1.45825	-0.97809	-0.75317	-0.05881	-1.79468	-1.31452	-1.0896	-1.73587	-1.25571	-1.03079	0.48016	0.70508	0.22492
chr6	142889154	142889163	+	chr6	142889031	142889302	transcript	St8sia1	0.08808	0.04737	0.05925	0.02595	0.30599	0.11209	0.14335	0.36453	0.24831	0.60112	-1.13431	-0.17847	-0.38198	-0.11621	0.23659	-1.49884	-0.543	-0.74651	0.3528	-1.38263	-0.42678	-0.6303	-1.73543	-0.77959	-0.9831	0.95584	0.75233	-0.20351
chr10	77530300	77530309	-	chr10	77530129	77530494	5UTR	Itgb2	0.1869	0.20987	0.09669	0.12003	0.61905	0.2447	0.25783	-0.1133	0.55822	0.39184	-1.34317	-0.26973	-0.32456	0.67152	0.50514	-1.22987	-0.15643	-0.21126	-0.16638	-1.90139	-0.82795	-0.88278	-1.73501	-0.66158	-0.71641	1.07344	1.01861	-0.05483
chr11	11763513	11763522	+	chr11	11763092	11763708	CDS	Ikzf1	0.14371	0.10135	0.16973	0.07205	0.45924	0.19215	0.14137	0.28281	-0.14971	0.51693	-1.21784	-0.26731	0.01426	-0.43252	0.23412	-1.50065	-0.55013	-0.26856	0.66664	-1.06813	-0.1176	0.16397	-1.73477	-0.78424	-0.50267	0.95053	1.2321	0.28157
chr7	116607272	116607281	+	chr7	116607159	116607429	NA	NA	0.0551	0.02382	0.02249	0.0541	0.39946	0.26295	0.08027	0.33905	0.3554	0.00969	-1.72497	-1.25803	-0.2247	0.01634	-0.32936	-2.06402	-1.59709	-0.56375	-0.34571	-2.08036	-1.61343	-0.58009	-1.73466	-1.26773	-0.23439	0.46693	1.50027	1.03334
chr7	45635622	45635631	-	chr7	45635148	45635696	exon	A030001D20Rik	0.03158	0.011	0.06337	0.02183	0.29205	0.13716	0.13761	0.25766	-0.32497	0.11636	-1.61825	-0.87898	-0.88178	-0.58263	-0.1413	-1.8759	-1.13663	-1.13943	0.44133	-1.29327	-0.554	-0.5568	-1.7346	-0.99533	-0.99813	0.73927	0.73647	-0.0028
chr4	134307730	134307739	-	chr4	134307390	134308122	NA	NA	0.39029	0.25665	0.15534	0.16469	0.76685	0.45985	0.34565	0.46556	0.95706	0.904	-0.82957	-0.19353	0.13944	0.4915	0.43844	-1.29512	-0.65909	-0.32612	-0.05306	-1.78662	-1.15059	-0.81762	-1.73356	-1.09753	-0.76456	0.63603	0.96901	0.33297
chr7	99674312	99674321	-	chr7	99674263	99674519	transcript	Slco2b1	0.08943	0.04983	0.01806	0.0008	0.22177	0.11174	0.07278	0.35032	0.70971	0.95044	-0.78282	-0.16538	0.13709	0.35938	0.60011	-1.13315	-0.5157	-0.21324	0.24073	-1.49253	-0.87509	-0.57262	-1.73326	-1.11582	-0.81335	0.61744	0.91991	0.30247
chr6	82940961	82940970	-	chr6	82940762	82941112	NA	NA	0.11076	0.092	0.03569	0.02521	0.3027	0.16669	0.13467	0.13845	0.65785	0.77917	-0.95326	-0.34802	-0.15915	0.51939	0.64071	-1.09172	-0.48648	-0.2976	0.12132	-1.61111	-1.00587	-0.817	-1.73243	-1.12719	-0.93832	0.60524	0.79411	0.18887
chr14	31761960	31761969	-	chr14	31761730	31762070	5UTR	Ankrd28	0.20553	0.19387	0.11432	0.06187	0.42402	0.27481	0.20685	0.05723	0.52337	0.94125	-0.7898	-0.29995	-0.00634	0.46614	0.88401	-0.84703	-0.35719	-0.06357	0.41788	-1.31317	-0.82332	-0.52971	-1.73105	-1.2412	-0.94759	0.48985	0.78346	0.29361
chr12	112760663	112760672	+	chr12	112760194	112760808	5UTR	Pld4	0.11149	0.04402	0.06088	0.06238	0.42564	0.27168	0.19303	0.57333	0.40734	0.39346	-1.33738	-0.83075	-0.48164	-0.16599	-0.17987	-1.91072	-1.40408	-1.05497	-0.01388	-1.74473	-1.23809	-0.88898	-1.73085	-1.22421	-0.8751	0.50664	0.85575	0.34911
chr7	116529962	116529971	+	chr7	116529903	116530132	CDS	Nucb2	0.03138	0.02635	0.0141	0.05438	0.39904	0.1713	0.14007	0.05895	0.21348	-0.24254	-1.97326	-1.0798	-0.8993	0.15453	-0.3015	-2.03221	-1.13875	-0.95825	-0.45603	-2.18674	-1.29328	-1.11278	-1.73071	-0.83726	-0.65675	0.89345	1.07396	0.1805
chr8	117596994	117597003	-	chr8	117596596	117597327	CDS	Plcg2	0.38248	0.24921	0.10438	0.11469	0.59864	0.50888	0.29089	0.47303	1.26309	1.19008	-0.53945	-0.3393	0.30779	0.79006	0.71705	-1.01248	-0.81233	-0.16524	-0.07301	-1.80254	-1.60239	-0.9553	-1.72954	-1.52938	-0.88229	0.20016	0.84724	0.64709
chr16	30533743	30533752	-	chr16	30533592	30533919	transcript	Tmem44	0.33898	0.23947	0.16312	0.12248	0.62432	0.24104	0.20126	0.37649	0.75129	0.99923	-0.73	0.36972	0.55193	0.37479	0.62274	-1.10649	-0.00677	0.17543	0.24795	-1.48128	-0.38157	-0.19936	-1.72923	-0.62951	-0.44731	1.09972	1.28192	0.1822
chr18	65376345	65376354	+	chr18	65375852	65376500	CDS	Alpk2	0.06746	0.04226	0.02688	0.05748	0.40859	0.12307	0.16607	0.2444	0.41685	0.0919	-1.63669	-0.42641	-0.68688	0.17245	-0.1525	-1.88109	-0.67081	-0.93128	-0.32495	-2.05354	-0.84326	-1.10373	-1.72859	-0.51831	-0.77878	1.21028	0.94981	-0.26047
chr4	121197150	121197159	-	chr4	121197009	121197401	NA	NA	0.08929	0.06685	0.03208	0.0442	0.36458	0.18515	0.09241	0.18814	0.5389	0.40673	-1.32187	-0.60624	-0.02432	0.35076	0.21859	-1.51	-0.79438	-0.21246	-0.13217	-1.86076	-1.14513	-0.56322	-1.72859	-1.01297	-0.43105	0.71563	1.29755	0.58192
chr4	123313131	123313140	+	chr4	123312967	123313412	3UTR	Bmp8a	0.09713	0.06059	0.02321	0.05509	0.40066	0.21483	0.18205	0.30566	0.70427	0.35784	-1.37073	-0.69154	-0.5298	0.39861	0.05218	-1.67639	-0.9972	-0.83546	-0.34643	-2.075	-1.39581	-1.23407	-1.72857	-1.04938	-0.88763	0.67919	0.84093	0.16174
chr5	93152656	93152665	-	chr5	93152040	93152878	CDS	Septin11	0.35139	0.27487	0.18218	0.1638	0.76087	0.48355	0.29567	0.27179	0.68896	0.78823	-0.94025	-0.37469	0.1927	0.41718	0.51644	-1.21204	-0.64648	-0.07909	0.09926	-1.62921	-1.06366	-0.49626	-1.72848	-1.16292	-0.59553	0.56556	1.13295	0.56739
chr11	113544433	113544442	-	chr11	113544082	113544720	NA	NA	0.0846	0.06584	0.04455	0.0447	0.36619	0.19073	0.15406	0.15987	0.36574	0.36418	-1.36426	-0.67211	-0.47339	0.20588	0.20432	-1.52413	-0.83198	-0.63326	-0.00156	-1.73001	-1.03785	-0.83913	-1.72845	-1.03629	-0.83758	0.69215	0.89087	0.19872
chr4	11368495	11368504	+	chr4	11368175	11368966	NA	NA	0.21288	0.1782	0.07947	0.04895	0.38027	0.27957	0.23546	0.17286	0.82209	1.10082	-0.62762	-0.28349	-0.10235	0.64923	0.92796	-0.80048	-0.45635	-0.27521	0.27873	-1.44971	-1.10558	-0.92443	-1.72844	-1.38431	-1.20317	0.34413	0.52527	0.18115
chr4	118144490	118144499	+	chr4	118144333	118144696	CDS	Kdm4a	0.07946	0.10586	0.05788	0.05053	0.38542	0.13581	0.13889	-0.20411	0.19138	0.26282	-1.46536	-0.40533	-0.42452	0.39549	0.46693	-1.26125	-0.20122	-0.2204	0.07144	-1.65674	-0.59671	-0.61589	-1.72818	-0.66815	-0.68733	1.06003	1.04085	-0.01919
chr13	43514990	43514999	-	chr13	43514811	43515642	NA	NA	0.2466	0.17997	0.09123	0.14776	0.70642	0.34638	0.39118	0.3138	0.87787	0.49407	-1.23207	-0.37043	-0.51013	0.56407	0.18027	-1.54587	-0.68423	-0.82393	-0.3838	-2.10994	-1.2483	-1.388	-1.72614	-0.8645	-1.0042	0.86164	0.72194	-0.1397
chr6	8687383	8687392	-	chr6	8687170	8687606	transcript	Ica1	0.06142	0.02191	0.05343	0.01849	0.27869	0.12465	0.09531	0.42238	0.07602	0.46549	-1.26045	-0.49178	-0.28416	-0.34636	0.04311	-1.68283	-0.91416	-0.70654	0.38947	-1.33647	-0.5678	-0.36018	-1.72594	-0.95727	-0.74966	0.76867	0.97629	0.20762
chr13	3837496	3837505	+	chr13	3837340	3837660	5UTR	Calm4	0.0968	0.01521	0.04846	0.04915	0.37988	0.1371	0.13972	0.80355	0.42086	0.41391	-1.31133	-0.27613	-0.29237	-0.38268	-0.38964	-2.11488	-1.07967	-1.09592	-0.00696	-1.7322	-0.69699	-0.71324	-1.72524	-0.69003	-0.70628	1.03521	1.01896	-0.01625
chr3	105900876	105900885	+	chr3	105900754	105901051	transcript	Tmigd3	0.08933	0.08567	0.09686	0.07775	0.47443	0.1731	0.17089	0.02905	-0.05799	0.094	-1.63121	-0.54232	-0.53035	-0.08705	0.06495	-1.66026	-0.57137	-0.5594	0.15199	-1.57321	-0.48433	-0.47235	-1.72521	-0.63632	-0.62435	1.08889	1.10086	0.01198
chr12	105971471	105971480	-	chr12	105971200	105971576	NA	NA	0.14735	0.08901	0.08674	0.03935	0.34728	0.15004	0.18087	0.39873	0.41671	0.8547	-0.86989	-0.01597	-0.18744	0.01798	0.45597	-1.26862	-0.4147	-0.58617	0.43799	-1.2866	-0.43268	-0.60415	-1.72459	-0.87067	-1.04214	0.85392	0.68245	-0.17147
chr1	155050407	155050416	-	chr1	155050186	155050553	exon	Gm41980	0.18401	0.31182	0.12319	0.15377	0.72504	0.20992	0.38101	-0.54529	0.35582	0.16598	-1.55794	-0.12844	-0.77228	0.90111	0.71127	-1.01265	0.41685	-0.22699	-0.18984	-1.91376	-0.48426	-1.1281	-1.72392	-0.29442	-0.93826	1.4295	0.78566	-0.64384
chr18	12154315	12154324	+	chr18	12154014	12154559	CDS	Riok3	0.09494	0.08672	0.04571	0.04501	0.36546	0.17249	0.14635	0.06409	0.43482	0.44205	-1.28089	-0.4956	-0.3468	0.37074	0.37797	-1.34497	-0.55968	-0.41089	0.00723	-1.71571	-0.93042	-0.78162	-1.72294	-0.93765	-0.78886	0.78529	0.93409	0.1488
chr9	120675003	120675012	+	chr9	120674752	120675573	transcript	Gm39457	0.06589	0.07236	0.04185	0.00028	0.21765	0.13218	0.13478	-0.05714	0.23467	0.76049	-0.96175	-0.49973	-0.5162	0.29181	0.81763	-0.90461	-0.44259	-0.45906	0.52582	-1.19642	-0.7344	-0.75087	-1.72224	-1.26022	-1.27669	0.46202	0.44555	-0.01647
chr2	34977426	34977435	-	chr2	34976976	34977741	3UTR	Hc	0.36836	0.4286	0.2591	0.25228	1.04827	0.6315	0.51431	-0.1766	0.3887	0.41682	-1.30435	-0.64968	-0.3956	0.5653	0.59342	-1.12775	-0.47308	-0.219	0.02812	-1.69305	-1.03837	-0.7843	-1.72117	-1.06649	-0.81242	0.65467	0.90875	0.25407
chr5	21131284	21131293	+	chr5	21131150	21131685	exon	Gm18830	0.0177	0.04165	0.02282	0.02405	0.29533	0.1058	0.11003	-0.27969	-0.06452	-0.0796	-1.79907	-0.83751	-0.86769	0.21517	0.2001	-1.51937	-0.55782	-0.588	-0.01508	-1.73455	-0.77299	-0.80318	-1.71947	-0.75791	-0.7881	0.96156	0.93137	-0.03019
chrX	169979262	169979271	+	chrX	169978482	169979403	transcript	G530011O06Rik	1.08135	0.96705	1.08825	0.89541	3.16463	2.51741	1.2476	0.14756	-0.00844	0.24839	-1.47098	-1.15157	-0.19083	-0.15601	0.10083	-1.61854	-1.29913	-0.33839	0.25684	-1.46254	-1.14313	-0.18238	-1.71937	-1.39996	-0.43922	0.31941	1.28015	0.96074
chr17	74440705	74440714	-	chr17	74440447	74440902	transcript	Nlrc4	0.11238	0.06093	0.07119	0.07589	0.46588	0.15838	0.11541	0.41311	0.32074	0.28033	-1.43871	-0.28998	-0.021	-0.09237	-0.13278	-1.85182	-0.70308	-0.43411	-0.04041	-1.75945	-0.61072	-0.34174	-1.71904	-0.5703	-0.30133	1.14874	1.41771	0.26897
chr15	7114077	7114086	+	chr15	7113760	7114352	NA	NA	0.06739	0.05035	0.0247	0.04258	0.35621	0.13538	0.14494	0.16072	0.44243	0.2404	-1.47861	-0.50653	-0.56537	0.28171	0.07968	-1.63933	-0.66724	-0.72609	-0.20203	-1.92104	-0.94896	-1.0078	-1.71901	-0.74693	-0.80577	0.97209	0.91324	-0.05885
chr4	59040631	59040640	-	chr4	59040521	59040989	3UTR	Gng10	0.10839	0.09744	0.10617	0.07677	0.46862	0.14064	0.1292	0.08014	0.01589	0.24475	-1.47388	-0.21307	-0.14103	-0.06425	0.16461	-1.55403	-0.29321	-0.22118	0.22886	-1.48978	-0.22896	-0.15693	-1.71864	-0.45782	-0.38579	1.26082	1.33285	0.07203
chr11	85324125	85324134	-	chr11	85323717	85324696	NA	NA	0.42117	0.2899	0.25544	0.19621	0.86155	0.50846	0.50205	0.42408	0.55967	0.82741	-0.89096	-0.22572	-0.21029	0.13559	0.40333	-1.31504	-0.64979	-0.63437	0.26774	-1.45063	-0.78539	-0.76996	-1.71837	-1.05312	-1.0377	0.66524	0.68067	0.01543
chr13	24407062	24407071	+	chr13	24406893	24407182	5UTR	Cmah	0.05067	0.1159	0.02849	0.05227	0.38773	0.13771	0.11278	-0.53616	0.23965	-0.01584	-1.73372	-0.67862	-0.51458	0.77581	0.52032	-1.19755	-0.14246	0.02158	-0.25549	-1.97337	-0.91827	-0.75423	-1.71788	-0.66278	-0.49874	1.0551	1.21913	0.16404
chr12	111328591	111328600	+	chr12	111328399	111328761	CDS	Cdc42bpb	0.35574	0.19251	0.15111	0.09475	0.52722	0.4044	0.25582	0.65005	0.87499	1.25151	-0.46579	-0.14813	0.36225	0.22494	0.60146	-1.11584	-0.79818	-0.2878	0.37651	-1.34078	-1.02313	-0.51274	-1.7173	-1.39964	-0.88926	0.31766	0.82804	0.51038
chr12	25316133	25316142	+	chr12	25316003	25316307	transcript	Gm46343	0.03635	0.02712	0.03913	0.02862	0.30977	0.11926	0.05779	0.10574	-0.03039	0.08802	-1.62927	-0.70915	-0.2193	-0.13613	-0.01772	-1.73501	-0.81489	-0.32504	0.11841	-1.59888	-0.67876	-0.18891	-1.71729	-0.79717	-0.30732	0.92012	1.40998	0.48985
chr12	85648137	85648146	+	chr12	85647985	85648300	exon	Gm33312	0.05037	0.02259	0.03305	0.04119	0.35106	0.08606	0.13609	0.30773	0.18403	0.09461	-1.62254	-0.31821	-0.6715	-0.1237	-0.21312	-1.93028	-0.62595	-0.97923	-0.08942	-1.80658	-0.50225	-0.85553	-1.71716	-0.41283	-0.76611	1.30433	0.95105	-0.35329
chr17	88123868	88123877	+	chr17	88123721	88124058	NA	NA	0.13258	0.08515	0.07572	0.06171	0.41848	0.2634	0.16309	0.33843	0.41633	0.54044	-1.17659	-0.65694	-0.18206	0.0779	0.202	-1.51502	-0.99537	-0.5205	0.1241	-1.59292	-1.07327	-0.5984	-1.71702	-1.19737	-0.7225	0.51965	0.99452	0.47487
chr8	3661080	3661089	-	chr8	3660910	3661221	transcript	Retn	0.0952	0.04923	0.07425	0.03685	0.33664	0.22089	0.15535	0.40097	0.16907	0.53115	-1.1855	-0.73418	-0.3978	-0.2319	0.13018	-1.58647	-1.13514	-0.79877	0.36208	-1.35457	-0.90324	-0.56687	-1.71665	-1.26533	-0.92895	0.45133	0.7877	0.33637
chr9	50866025	50866034	-	chr9	50865846	50866204	CDS	Ppp2r1b	0.21465	0.11627	0.07148	0.08862	0.50676	0.17559	0.20459	0.55318	0.89831	0.75632	-0.96025	0.19504	0.04777	0.34512	0.20314	-1.51343	-0.35815	-0.50542	-0.14198	-1.85855	-0.70327	-0.85054	-1.71657	-0.56129	-0.70855	1.15528	1.00802	-0.14727
chr7	107707968	107707977	-	chr7	107707607	107708082	transcript	Ppfibp2	0.11298	0.16858	0.07306	0.08432	0.49243	0.27184	0.2706	-0.3429	0.30871	0.21474	-1.50134	-0.82097	-0.81607	0.65161	0.55764	-1.15844	-0.47807	-0.47317	-0.09397	-1.81005	-1.12967	-1.12478	-1.71608	-1.03571	-1.03081	0.68038	0.68527	0.00489
chr6	133960828	133960837	-	chr6	133960729	133960998	NA	NA	0.37816	0.21334	0.21743	0.17958	0.80524	0.48278	0.38013	0.61903	0.59997	0.78676	-0.92907	-0.28861	-0.006	-0.01906	0.16773	-1.5481	-0.90764	-0.62503	0.18679	-1.52904	-0.88858	-0.60598	-1.71583	-1.07537	-0.79276	0.64046	0.92306	0.2826
chr15	8625646	8625655	+	chr15	8625398	8625849	3UTR	Slc1a3	0.33719	0.16189	0.09746	0.16177	0.74669	0.30886	0.48129	0.75223	1.17023	0.7529	-0.96284	0.09799	-0.41576	0.41801	0.00068	-1.71507	-0.65424	-1.16798	-0.41733	-2.13308	-1.07225	-1.58599	-1.71575	-0.65492	-1.16866	1.06083	0.54709	-0.51374
chr18	73693628	73693637	+	chr18	73693392	73693862	5UTR	Smad4	0.11481	0.06288	0.04459	0.01937	0.27871	0.15825	0.1108	0.41196	0.59049	0.8797	-0.8351	-0.27237	0.02794	0.17854	0.46774	-1.24706	-0.68432	-0.38402	0.28921	-1.4256	-0.86286	-0.56255	-1.7148	-1.15207	-0.85176	0.56274	0.86305	0.30031
chr13	30786289	30786298	+	chr13	30786089	30786591	3UTR	Exoc2	0.10673	0.06587	0.05681	0.07892	0.47417	0.21144	0.18167	0.3279	0.41193	0.21486	-1.49991	-0.60502	-0.4572	0.08403	-0.11304	-1.8278	-0.93292	-0.7851	-0.19707	-1.91184	-1.01695	-0.86913	-1.71477	-0.81988	-0.67206	0.89489	1.04271	0.14782
chr6	54116970	54116979	+	chr6	54116905	54117632	NA	NA	0.03532	0.01488	0.03552	0.02052	0.28237	0.08816	0.16198	0.24768	-0.00223	0.17499	-1.53938	-0.49345	-0.98371	-0.24991	-0.0727	-1.78706	-0.74114	-1.23139	0.17721	-1.53715	-0.49123	-0.98148	-1.71436	-0.66844	-1.15869	1.04592	0.55567	-0.49025
chr8	11113349	11113358	+	chr8	11113018	11113575	NA	NA	0.23305	0.12543	0.04386	0.0799	0.47703	0.26419	0.2697	0.57521	1.2448	0.91028	-0.80358	-0.13112	-0.15313	0.66959	0.33507	-1.37879	-0.70633	-0.72834	-0.33451	-2.04838	-1.37591	-1.39792	-1.71387	-1.0414	-1.06341	0.67247	0.65046	-0.02201
chr10	37190297	37190306	+	chr10	37189990	37190472	NA	NA	0.04749	0.02426	0.01734	0.01565	0.26614	0.09412	0.06414	0.25824	0.34504	0.36706	-1.34631	-0.41032	-0.16023	0.0868	0.10882	-1.60455	-0.66856	-0.41847	0.02202	-1.69135	-0.75536	-0.50527	-1.71337	-0.77738	-0.52729	0.93599	1.18608	0.25009
chr15	101252779	101252788	+	chr15	101252655	101252972	NA	NA	0.15543	0.04021	0.0222	0.05227	0.38614	0.19581	0.22399	0.8929	1.10037	0.76898	-0.94413	-0.21627	-0.35003	0.20747	-0.12392	-1.83703	-1.10917	-1.24294	-0.33139	-2.0445	-1.31664	-1.4504	-1.71311	-0.98525	-1.11902	0.72785	0.59409	-0.13376
chr3	101010982	101010991	+	chr3	101010525	101011146	transcript	Cd101	0.07853	0.08277	0.02132	0.06923	0.44125	0.16303	0.19286	-0.03498	0.58017	0.07982	-1.63195	-0.5744	-0.73267	0.61515	0.1148	-1.59697	-0.53943	-0.69769	-0.50035	-2.21212	-1.15457	-1.31284	-1.71177	-0.65423	-0.81249	1.05755	0.89928	-0.15826
chr1	181852519	181852528	+	chr1	181852052	181853382	NA	NA	0.21317	0.28353	0.22215	0.10603	0.56092	0.29269	0.21877	-0.29734	-0.04154	0.61819	-1.09166	-0.3319	-0.02604	0.2558	0.91553	-0.79432	-0.03456	0.27129	0.65973	-1.05012	-0.29036	0.01549	-1.70985	-0.95009	-0.64424	0.75976	1.06561	0.30586
chr7	91457356	91457365	+	chr7	91457229	91457594	CDS	Dlg2	0.30383	0.28044	0.18651	0.10483	0.55694	0.37439	0.15636	0.08736	0.50372	0.99971	-0.71002	-0.23542	0.66761	0.41636	0.91235	-0.79738	-0.32278	0.58025	0.49599	-1.21374	-0.73914	0.16389	-1.70973	-1.23513	-0.3321	0.4746	1.37763	0.90304
chr18	14657059	14657068	+	chr18	14656724	14657734	NA	NA	0.14007	0.14217	0.11957	0.08457	0.4906	0.23357	0.21238	-0.01287	0.13208	0.38997	-1.31959	-0.48442	-0.38802	0.14496	0.40284	-1.30671	-0.47155	-0.37515	0.25789	-1.45167	-0.61651	-0.5201	-1.70956	-0.8744	-0.77799	0.83516	0.93157	0.09641
chr8	34817842	34817851	-	chr8	34817540	34817997	CDS	Dusp4	0.11088	0.05422	0.03397	0.06505	0.42649	0.18457	0.17764	0.46637	0.67792	0.36479	-1.34402	-0.4428	-0.40648	0.21155	-0.10157	-1.81039	-0.90916	-0.87285	-0.31312	-2.02194	-1.12071	-1.0844	-1.70882	-0.80759	-0.77128	0.90123	0.93754	0.03631
chr18	60805912	60805921	+	chr18	60805532	60806062	exon	Cd74	0.5021	0.22637	0.18984	0.13795	0.6643	0.49516	0.52937	0.89529	1.06981	1.36079	-0.34708	0.01689	-0.06451	0.17452	0.4655	-1.24238	-0.87841	-0.9598	0.29098	-1.4169	-1.05292	-1.13432	-1.70788	-1.3439	-1.4253	0.36397	0.28258	-0.0814
chr19	7020328	7020337	+	chr19	7020193	7020693	3UTR	Stip1	0.21822	0.30194	0.16935	0.17922	0.79854	0.35726	0.22138	-0.34247	0.24537	0.19234	-1.5146	-0.53104	-0.01452	0.58784	0.53481	-1.17213	-0.18857	0.32796	-0.05303	-1.75997	-0.77641	-0.25988	-1.70694	-0.72338	-0.20685	0.98356	1.50009	0.51652
chr5	102778033	102778042	+	chr5	102777830	102778476	5UTR	Arhgap24	0.07165	0.04385	0.01687	0.06627	0.42948	0.14494	0.13307	0.2646	0.5782	0.04756	-1.65851	-0.52784	-0.45441	0.31359	-0.21704	-1.92311	-0.79244	-0.71901	-0.53063	-2.2367	-1.10604	-1.03261	-1.70607	-0.5754	-0.50197	1.13067	1.2041	0.07343
chr19	6276123	6276132	-	chr19	6275955	6276260	exon	Gm14963	0.35255	0.26296	0.31994	0.26942	1.09203	0.275	0.48147	0.32286	0.10934	0.297	-1.40874	0.27503	-0.36574	-0.21352	-0.02586	-1.7316	-0.04783	-0.68859	0.18766	-1.51808	0.16569	-0.47507	-1.70574	-0.02197	-0.66274	1.68377	1.04301	-0.64077
chr7	134669636	134669645	+	chr7	134669535	134670170	5UTR	Dock1	0.04016	0.06124	0.02443	0.01799	0.27182	0.10886	0.08878	-0.21018	0.17956	0.26005	-1.44548	-0.59562	-0.44544	0.38974	0.47023	-1.2353	-0.38544	-0.23526	0.08049	-1.62504	-0.77518	-0.625	-1.70553	-0.85567	-0.70549	0.84986	1.00004	0.15018
chr15	66746582	66746591	+	chr15	66746384	66746863	CDS	Tg	0.107	0.09123	0.05746	0.09826	0.53337	0.18799	0.15533	0.11773	0.40767	0.06406	-1.6409	-0.48793	-0.31051	0.28995	-0.05367	-1.75863	-0.60566	-0.42824	-0.34362	-2.04858	-0.89561	-0.71819	-1.70496	-0.55199	-0.37457	1.15297	1.33039	0.17742
chr9	69336320	69336329	-	chr9	69335977	69336421	NA	NA	0.06445	0.08713	0.05684	0.02524	0.2953	0.08081	0.10783	-0.19271	0.07089	0.40941	-1.29551	-0.14155	-0.34862	0.26361	0.60213	-1.10279	0.05117	-0.15591	0.33852	-1.3664	-0.21244	-0.41952	-1.70492	-0.55096	-0.75804	1.15396	0.94688	-0.20708
chr5	36563253	36563262	+	chr5	36562890	36563495	CDS	Tbc1d14	0.14299	0.07067	0.07432	0.10545	0.5562	0.24528	0.27823	0.52458	0.493	0.24851	-1.45509	-0.51719	-0.65082	-0.03158	-0.27607	-1.97967	-1.04177	-1.1754	-0.24449	-1.94809	-1.01019	-1.14382	-1.7036	-0.7657	-0.89933	0.9379	0.80428	-0.13362
chr15	78589099	78589108	+	chr15	78588914	78589289	exon	Gm52186	0.17518	0.15873	0.05526	0.11905	0.60017	0.2181	0.30063	0.09089	0.84967	0.33703	-1.3659	-0.21325	-0.5515	0.75878	0.24614	-1.45679	-0.30414	-0.64239	-0.51264	-2.21557	-1.06292	-1.40117	-1.70292	-0.55028	-0.88853	1.15264	0.81439	-0.33825
chr5	86086952	86086961	-	chr5	86086846	86087184	exon	Stap1	0.08342	0.04337	0.05578	0.05588	0.39445	0.13616	0.09543	0.36851	0.24395	0.24299	-1.45975	-0.375	-0.09437	-0.12456	-0.12552	-1.82826	-0.74351	-0.46288	-0.00096	-1.7037	-0.61895	-0.33832	-1.70274	-0.61799	-0.33736	1.08475	1.36538	0.28064
chr6	30229139	30229148	+	chr6	30228972	30229280	NA	NA	0.05643	0.02232	0.01613	0.01723	0.26861	0.08591	0.07483	0.37029	0.44901	0.4347	-1.26793	-0.25779	-0.16622	0.07872	0.06441	-1.63822	-0.62808	-0.53651	-0.01431	-1.71693	-0.7068	-0.61523	-1.70263	-0.69249	-0.60092	1.01013	1.10171	0.09157
chr9	57421386	57421395	-	chr9	57420267	57421619	CDS	Ppcdc	0.36628	0.54494	0.21278	0.25982	1.05724	0.74753	0.5082	-0.47295	0.58492	0.37926	-1.32213	-0.87015	-0.38755	1.05787	0.85221	-0.84919	-0.3972	0.0854	-0.20565	-1.90705	-1.45506	-0.97246	-1.7014	-1.24941	-0.76681	0.45199	0.93459	0.4826
chr17	72934324	72934333	-	chr17	72934190	72934449	transcript	Lbh	0.10112	0.07322	0.04109	0.0811	0.47549	0.25639	0.1956	0.22231	0.52962	0.15597	-1.54409	-0.84378	-0.5691	0.30731	-0.06633	-1.7664	-1.06609	-0.7914	-0.37365	-2.07372	-1.3734	-1.09872	-1.70007	-0.99975	-0.72507	0.70031	0.975	0.27468
chr15	25269822	25269831	-	chr15	25269416	25270122	NA	NA	0.18565	0.12299	0.14135	0.08336	0.48281	0.25287	0.23187	0.36562	0.24857	0.6562	-1.04381	-0.31052	-0.22049	-0.11705	0.29058	-1.40943	-0.67614	-0.58611	0.40763	-1.29238	-0.55909	-0.46906	-1.70001	-0.96672	-0.87669	0.73329	0.82332	0.09003
chr4	155187321	155187330	+	chr4	155187069	155187672	transcript	Ski	0.11328	0.14007	0.07147	0.08869	0.49995	0.27172	0.20764	-0.17516	0.32457	0.18195	-1.51763	-0.81841	-0.5407	0.49973	0.35711	-1.34247	-0.64325	-0.36554	-0.14262	-1.8422	-1.14298	-0.86528	-1.69958	-1.00035	-0.72265	0.69922	0.97693	0.2777
chr10	127103832	127103841	+	chr10	127103647	127103981	exon	Gm40799	0.14782	0.14552	0.12893	0.08725	0.49523	0.19024	0.28127	0.01377	0.11722	0.41545	-1.28402	-0.23295	-0.63347	0.10344	0.40168	-1.29779	-0.24673	-0.64724	0.29824	-1.40124	-0.35017	-0.75068	-1.69947	-0.64841	-1.04892	1.05106	0.65055	-0.40051
chr12	81844788	81844797	+	chr12	81844521	81845440	NA	NA	0.30299	0.21967	0.12797	0.10148	0.54108	0.29579	0.35208	0.33961	0.83802	1.02115	-0.6775	0.02639	-0.1681	0.49841	0.68153	-1.01711	-0.31323	-0.50771	0.18312	-1.51552	-0.81163	-1.00612	-1.69864	-0.99476	-1.18925	0.70388	0.5094	-0.19449
chr14	32093994	32094003	+	chr14	32093127	32094114	transcript	Oxnad1	0.14373	0.11484	0.06859	0.08086	0.4739	0.19566	0.13364	0.18672	0.54739	0.44258	-1.25543	-0.28476	0.0625	0.36067	0.25586	-1.44215	-0.47148	-0.12421	-0.10481	-1.80282	-0.83215	-0.48488	-1.69801	-0.72734	-0.38008	0.97067	1.31793	0.34727
chr6	54736245	54736254	+	chr6	54735956	54736502	NA	NA	0.0401	0.03745	0.00634	0.03989	0.34086	0.11827	0.08412	0.02874	0.41751	0.00226	-1.69538	-0.6616	-0.40888	0.38877	-0.02648	-1.72412	-0.69034	-0.43762	-0.41525	-2.11289	-1.07911	-0.82639	-1.69764	-0.66386	-0.41113	1.03378	1.28651	0.25273
chr4	132780535	132780544	-	chr4	132780287	132780675	3UTR	Themis2	0.16718	0.14772	0.10203	0.06071	0.40832	0.15503	0.13955	0.1116	0.41351	0.75453	-0.9429	0.06866	0.16115	0.30192	0.64293	-1.0545	-0.04294	0.04955	0.34102	-1.35641	-0.34485	-0.25236	-1.69743	-0.68587	-0.59338	1.01156	1.10405	0.09249
chr3	103206601	103206610	-	chr3	103206414	103206891	NA	NA	0.06083	0.08559	0.05926	0.03869	0.33683	0.26836	0.16504	-0.2137	0.01468	0.22224	-1.47494	-1.22541	-0.74155	0.22838	0.43594	-1.26124	-1.0117	-0.52785	0.20756	-1.48962	-1.24009	-0.75623	-1.69718	-1.44764	-0.96379	0.24954	0.73339	0.48385
chr9	44986652	44986661	-	chr9	44985822	44986879	transcript	Cd3d	0.94194	0.402	0.36883	0.39175	1.48129	0.86634	0.94876	1.06215	1.16196	1.09226	-0.60456	0.1093	-0.00946	0.09981	0.03011	-1.66671	-0.95285	-1.07161	-0.06969	-1.76651	-1.05266	-1.17142	-1.69682	-0.98296	-1.10172	0.71385	0.59509	-0.11876
chr18	60805898	60805907	+	chr18	60805532	60806062	exon	Cd74	0.55594	0.2283	0.23095	0.16255	0.73804	0.58774	0.46549	1.01134	0.99953	1.34022	-0.35622	-0.06889	0.2161	-0.0118	0.32888	-1.36756	-1.08023	-0.79523	0.34068	-1.35576	-1.06842	-0.78343	-1.69644	-1.40911	-1.12411	0.28734	0.57233	0.28499
chr6	29526660	29526669	+	chr6	29526384	29527127	5UTR	Irf5	0.24183	0.19001	0.22686	0.11567	0.58559	0.31752	0.20697	0.24159	0.06574	0.67897	-1.01639	-0.29303	0.15799	-0.17586	0.43737	-1.25798	-0.53463	-0.08361	0.61323	-1.08213	-0.35877	0.09225	-1.69536	-0.972	-0.52098	0.72336	1.17438	0.45102
chr8	4214571	4214580	+	chr8	4212821	4214746	CDS	Prr36	0.48893	0.24173	0.2131	0.23058	0.95733	0.43192	0.63139	0.79557	0.92406	0.84426	-0.85055	0.14841	-0.31531	0.12849	0.04869	-1.64611	-0.64715	-1.11088	-0.0798	-1.7746	-0.77565	-1.23937	-1.6948	-0.69584	-1.15957	0.99896	0.53523	-0.46372
chr8	34945320	34945329	+	chr8	34945057	34945375	NA	NA	0.15358	0.20035	0.13171	0.13827	0.65834	0.21541	0.32144	-0.24941	0.13328	0.092	-1.60251	-0.32133	-0.74616	0.38269	0.3414	-1.35311	-0.07193	-0.49675	-0.04129	-1.7358	-0.45462	-0.87944	-1.69451	-0.41333	-0.83815	1.28118	0.85636	-0.42482
chr10	39613210	39613219	-	chr10	39612695	39613828	5UTR	Traf3ip2	0.49491	0.40201	0.32452	0.20333	0.8688	0.44813	0.49847	0.24756	0.4925	0.98538	-0.70895	0.11936	-0.00869	0.24494	0.73782	-0.95651	-0.12821	-0.25625	0.49288	-1.20145	-0.37315	-0.50119	-1.69433	-0.86603	-0.99407	0.82831	0.70026	-0.12805
chr4	140566995	140567004	+	chr4	140566790	140567148	transcript	Arhgef10l	0.08567	0.10592	0.04293	0.03709	0.33079	0.1595	0.16566	-0.15387	0.39129	0.45405	-1.24024	-0.49605	-0.53066	0.54516	0.60792	-1.08637	-0.34218	-0.37679	0.06276	-1.63153	-0.88734	-0.92194	-1.69429	-0.9501	-0.98471	0.74419	0.70959	-0.0346
chr4	137346003	137346012	-	chr4	137345686	137346140	5UTR	Cdc42	0.06758	0.05852	0.04463	0.02043	0.27661	0.1483	0.15906	0.08312	0.22064	0.49687	-1.1964	-0.5838	-0.64642	0.13752	0.41375	-1.27951	-0.66692	-0.72954	0.27623	-1.41704	-0.80444	-0.86707	-1.69326	-1.08067	-1.14329	0.61259	0.54997	-0.06262
chr17	87299165	87299174	-	chr17	87299047	87299328	exon	Gm52284	0.1879	0.15112	0.10538	0.12368	0.61043	0.28473	0.27365	0.2015	0.49913	0.3726	-1.32051	-0.42566	-0.38285	0.29763	0.17109	-1.52201	-0.62716	-0.58435	-0.12654	-1.81964	-0.92479	-0.88199	-1.6931	-0.79826	-0.75545	0.89485	0.93765	0.04281
chr18	66437988	66437997	-	chr18	66437793	66438153	NA	NA	0.13326	0.11882	0.06528	0.09179	0.50708	0.24371	0.28895	0.0946	0.5121	0.29032	-1.40223	-0.57092	-0.75217	0.4175	0.19571	-1.49683	-0.66553	-0.84677	-0.22179	-1.91433	-1.08302	-1.26427	-1.69254	-0.86124	-1.04248	0.8313	0.65006	-0.18125
chr12	84243293	84243302	-	chr12	84243010	84243682	NA	NA	0.15174	0.12007	0.06766	0.14467	0.67607	0.19382	0.30695	0.19883	0.60341	0.04207	-1.64686	-0.22782	-0.70572	0.40457	-0.15676	-1.84569	-0.42665	-0.90456	-0.56134	-2.25027	-0.83123	-1.30913	-1.68893	-0.26989	-0.74779	1.41904	0.94114	-0.4779
chr2	157396198	157396207	-	chr2	157395955	157396356	stop_codon	Manbal	0.08589	0.04301	0.06157	0.04922	0.36818	0.08969	0.12383	0.39221	0.20924	0.32837	-1.36012	-0.03012	-0.27574	-0.18297	-0.06384	-1.75232	-0.42232	-0.66795	0.11913	-1.56935	-0.23935	-0.48498	-1.68849	-0.35849	-0.60411	1.33	1.08438	-0.24562
chr6	117431736	117431745	-	chr6	117431112	117431903	NA	NA	0.03653	0.02349	0.05276	0.04333	0.34911	0.1939	0.1339	0.15154	-0.16877	-0.07313	-1.76134	-1.13968	-0.80284	-0.32031	-0.22467	-1.91287	-1.29122	-0.95438	0.09564	-1.59256	-0.97091	-0.63407	-1.68821	-1.06655	-0.72971	0.62166	0.9585	0.33684
chr2	167775434	167775443	-	chr2	167774866	167775837	exon	Gm32287	0.24348	0.20241	0.32395	0.19019	0.82221	0.40771	0.33195	0.18706	-0.30832	0.24775	-1.4402	-0.5717	-0.33566	-0.49538	0.06069	-1.62726	-0.75876	-0.52272	0.55607	-1.13188	-0.26338	-0.02734	-1.68795	-0.81945	-0.58341	0.8685	1.10454	0.23604
chr2	128203343	128203352	+	chr2	128203003	128203458	exon	Gm14009	0.08661	0.06026	0.04695	0.03905	0.33512	0.10932	0.11049	0.22717	0.35713	0.4402	-1.24735	-0.17065	-0.17892	0.12996	0.21302	-1.47452	-0.39782	-0.40609	0.08306	-1.60448	-0.52778	-0.53605	-1.68754	-0.61085	-0.61912	1.0767	1.06843	-0.00827
chr1	164135622	164135631	-	chr1	164135251	164135805	CDS	Selp	0.21287	0.20858	0.13691	0.08149	0.47172	0.23434	0.35521	0.02029	0.40991	0.80536	-0.88192	-0.09749	-0.54939	0.38962	0.78507	-0.90222	-0.11778	-0.56968	0.39545	-1.29183	-0.5074	-0.9593	-1.68728	-0.90285	-1.35475	0.78444	0.33253	-0.4519
chr7	16018642	16018651	+	chr7	16018164	16018789	NA	NA	0.54813	0.43151	0.21223	0.25893	1.04304	0.96932	0.8226	0.28902	1.06763	0.86302	-0.8241	-0.72742	-0.51326	0.77861	0.574	-1.11312	-1.01644	-0.80228	-0.20461	-1.89174	-1.79505	-1.58089	-1.68712	-1.59044	-1.37628	0.09669	0.31084	0.21416
chr8	126804304	126804313	-	chr8	126804068	126804496	exon	Gm31718	0.16423	0.21563	0.15515	0.09377	0.51093	0.26515	0.17815	-0.26166	0.05159	0.45917	-1.22731	-0.47554	-0.07567	0.31325	0.72082	-0.96565	-0.21388	0.18598	0.40758	-1.2789	-0.52713	-0.12727	-1.68648	-0.9347	-0.53484	0.75177	1.15164	0.39986
chr15	52753486	52753495	-	chr15	52753344	52753608	NA	NA	0.06808	0.05496	0.03062	0.03656	0.32674	0.17482	0.14195	0.12159	0.3785	0.31146	-1.37486	-0.72905	-0.54108	0.25692	0.18987	-1.49644	-0.85064	-0.66266	-0.06705	-1.75336	-1.10755	-0.91958	-1.68631	-1.04051	-0.85254	0.6458	0.83378	0.18797
chr2	158651312	158651321	+	chr2	158651172	158651509	NA	NA	0.12869	0.07951	0.05172	0.05586	0.38882	0.14643	0.18835	0.35956	0.61098	0.57064	-1.11558	-0.11046	-0.34211	0.25142	0.21108	-1.47514	-0.47002	-0.70167	-0.04035	-1.72656	-0.72144	-0.95309	-1.68621	-0.6811	-0.91274	1.00512	0.77347	-0.23165
chr13	52061683	52061692	+	chr13	52061357	52062260	NA	NA	0.21557	0.21453	0.12131	0.08413	0.47946	0.24768	0.1944	0.00485	0.52334	0.79648	-0.88889	-0.14227	0.10211	0.51849	0.79163	-0.89374	-0.14712	0.09726	0.27314	-1.41223	-0.66561	-0.42123	-1.68537	-0.93875	-0.69437	0.74662	0.991	0.24438
chr8	119424015	119424024	+	chr8	119423595	119424320	exon	Gm32006	0.21817	0.17741	0.05999	0.13118	0.63064	0.39919	0.29556	0.20168	1.01831	0.47081	-1.21428	-0.65939	-0.31928	0.81663	0.26912	-1.41596	-0.86107	-0.52097	-0.5475	-2.23259	-1.6777	-1.33759	-1.68508	-1.1302	-0.79009	0.55489	0.89499	0.3401
chr2	68873237	68873246	+	chr2	68873104	68874304	NA	NA	0.07477	0.10013	0.06518	0.03255	0.31345	0.15834	0.20717	-0.20169	0.08427	0.41464	-1.27031	-0.5796	-0.83458	0.28596	0.61633	-1.06863	-0.37792	-0.6329	0.33037	-1.35458	-0.66387	-0.91885	-1.68495	-0.99424	-1.24922	0.69071	0.43573	-0.25498
chr15	96654911	96654920	+	chr15	96654736	96655110	NA	NA	0.3711	0.29704	0.24214	0.19435	0.83338	0.42829	0.73043	0.25008	0.46818	0.68924	-0.99523	-0.16723	-0.82552	0.2181	0.43917	-1.24531	-0.4173	-1.0756	0.22106	-1.46341	-0.63541	-1.2937	-1.68448	-0.85647	-1.51476	0.82801	0.16972	-0.65829
chr5	134214642	134214651	-	chr5	134214075	134214832	CDS	Gtf2ird2	0.08088	0.06956	0.05735	0.06717	0.42426	0.28591	0.13674	0.0964	0.20816	0.11761	-1.56595	-1.11818	-0.3994	0.11175	0.0212	-1.66235	-1.21458	-0.49581	-0.09055	-1.7741	-1.32634	-0.60756	-1.68355	-1.23579	-0.51701	0.44777	1.16654	0.71878
chr7	110840498	110840507	+	chr7	110840384	110840678	5UTR	Rnf141	0.10116	0.1428	0.06903	0.1043	0.54351	0.19473	0.18096	-0.27869	0.25916	-0.023	-1.70651	-0.56447	-0.49403	0.53784	0.25569	-1.42782	-0.28578	-0.21534	-0.28215	-1.96567	-0.82362	-0.75318	-1.68351	-0.54147	-0.47103	1.14204	1.21248	0.07044
chr15	73492465	73492474	-	chr15	73492249	73492640	exon	Gm19811	0.20536	0.10258	0.07707	0.08677	0.48717	0.20846	0.14367	0.60614	0.80639	0.72694	-0.95649	-0.01485	0.33261	0.20026	0.1208	-1.56263	-0.62099	-0.27353	-0.07946	-1.76289	-0.82124	-0.47378	-1.68343	-0.74179	-0.39433	0.94164	1.2891	0.34746
chr10	60706373	60706382	-	chr10	60705837	60706689	3UTR	Slc29a3	0.10813	0.09283	0.07557	0.09269	0.50607	0.23054	0.19186	0.11341	0.25306	0.11449	-1.56867	-0.68244	-0.4995	0.13965	0.00108	-1.68208	-0.79585	-0.61291	-0.13857	-1.82173	-0.9355	-0.75256	-1.68316	-0.79693	-0.61399	0.88622	1.06916	0.18294
chr5	99336536	99336545	+	chr5	99336415	99336873	NA	NA	0.08907	0.04817	0.01845	0.1098	0.56094	0.29224	0.20401	0.36421	0.70188	-0.15456	-1.83755	-1.07607	-0.70221	0.33766	-0.51877	-2.20176	-1.44028	-1.06642	-0.85644	-2.53943	-1.77794	-1.40408	-1.68299	-0.92151	-0.54765	0.76148	1.13534	0.37386
chr15	101134483	101134492	+	chr15	101134308	101134696	5UTR	Acvrl1	0.12438	0.07835	0.03589	0.07406	0.44615	0.22947	0.29132	0.34106	0.74843	0.37737	-1.30554	-0.56626	-0.8185	0.40737	0.03631	-1.6466	-0.90731	-1.15956	-0.37106	-2.05396	-1.31468	-1.56693	-1.68291	-0.94363	-1.19587	0.73928	0.48703	-0.25225
chr11	20468887	20468896	+	chr11	20468716	20469041	exon	Gm39607	0.10538	0.07518	0.07169	0.05896	0.39718	0.14673	0.17326	0.23664	0.26667	0.38182	-1.29966	-0.27158	-0.42226	0.03003	0.14518	-1.5363	-0.50822	-0.6589	0.11515	-1.56632	-0.53825	-0.68893	-1.68148	-0.6534	-0.80408	1.02807	0.87739	-0.15068
chr12	35712024	35712033	-	chr12	35711450	35712140	NA	NA	0.05471	0	0.05007	0	0.20798	0.14437	0.17178	0.66036	0.04565	0.66036	-1.02072	-0.67979	-0.83666	-0.61471	0	-1.68108	-1.34015	-1.49702	0.61471	-1.06638	-0.72544	-0.88232	-1.68108	-1.34015	-1.49702	0.34093	0.18406	-0.15687
chr1	135631657	135631666	+	chr1	135631466	135632078	NA	NA	0.19198	0.16092	0.09842	0.08576	0.48294	0.23206	0.14919	0.16572	0.57104	0.6691	-1.01187	-0.18907	0.23361	0.40533	0.50338	-1.17759	-0.35478	0.06789	0.09805	-1.58291	-0.76011	-0.33743	-1.68097	-0.85817	-0.43549	0.8228	1.24548	0.42268
chr5	112179908	112179917	-	chr5	112179704	112180064	NA	NA	0.20446	0.26314	0.18476	0.13454	0.63932	0.19816	0.34726	-0.25875	0.09843	0.38472	-1.29619	0.03075	-0.5637	0.35718	0.64348	-1.03744	0.28951	-0.30495	0.28629	-1.39462	-0.06768	-0.66213	-1.68091	-0.35397	-0.94842	1.32694	0.73249	-0.59445
chr7	98809568	98809577	+	chr7	98809401	98809808	exon	n-TPagg7	0.1185	0.0726	0.09564	0.02511	0.28843	0.16558	0.24351	0.35061	0.164	0.83384	-0.84698	-0.28841	-0.66684	-0.18661	0.48323	-1.19759	-0.63902	-1.01745	0.66984	-1.01097	-0.4524	-0.83083	-1.68082	-1.12225	-1.50068	0.55857	0.18014	-0.37843
chr10	67696046	67696055	-	chr10	67695707	67696732	exon	Gm32438	0.25408	0.20607	0.11022	0.06011	0.40049	0.28916	0.25484	0.21395	0.76857	1.17416	-0.50622	-0.13843	-0.00314	0.55461	0.9602	-0.72017	-0.35239	-0.2171	0.40559	-1.27478	-0.907	-0.77171	-1.68037	-1.31259	-1.1773	0.36778	0.50307	0.13529
chr2	93162151	93162160	-	chr2	93161995	93162292	transcript	Gm32627	0.12174	0.13186	0.07307	0.03957	0.33456	0.21611	0.20551	-0.06606	0.36835	0.69067	-0.98937	-0.52298	-0.47284	0.43441	0.75673	-0.92331	-0.45692	-0.40678	0.32232	-1.35773	-0.89133	-0.8412	-1.68004	-1.21365	-1.16351	0.4664	0.51653	0.05013
chr17	28294636	28294645	+	chr17	28294465	28294890	CDS	Ppard	0.17922	0.17638	0.18999	0.08881	0.49225	0.2564	0.19588	0.01506	-0.05573	0.57907	-1.10075	-0.35865	-0.08532	-0.07079	0.56401	-1.11581	-0.37371	-0.10038	0.63479	-1.04502	-0.30292	-0.02959	-1.67981	-0.93772	-0.66438	0.7421	1.01543	0.27333
chr10	19939350	19939359	-	chr10	19939179	19939665	exon	Map3k5	0.45642	0.43443	0.2789	0.1909	0.81915	0.54079	0.68838	0.05879	0.56143	0.94947	-0.73006	-0.20566	-0.50714	0.50264	0.89067	-0.78885	-0.26445	-0.56594	0.38803	-1.29149	-0.76709	-1.06857	-1.67953	-1.15513	-1.45661	0.5244	0.22292	-0.30148
chr11	115631115	115631124	+	chr11	115631080	115631487	NA	NA	0.38114	0.27647	0.24485	0.23719	0.96733	0.52321	0.55055	0.35878	0.4874	0.52036	-1.15903	-0.37723	-0.43974	0.12862	0.16158	-1.51781	-0.73602	-0.79852	0.03296	-1.64643	-0.86463	-0.92714	-1.67939	-0.8976	-0.9601	0.7818	0.71929	-0.06251
chr4	131861491	131861500	+	chr4	131860611	131861685	exon	Mecr	0.13085	0.12957	0.07215	0.07855	0.45919	0.19395	0.18317	0.00823	0.43591	0.38146	-1.29786	-0.3565	-0.30151	0.42768	0.37324	-1.30609	-0.36473	-0.30973	-0.05445	-1.73377	-0.79241	-0.73742	-1.67932	-0.73797	-0.68297	0.94136	0.99636	0.055
chr14	8133027	8133036	-	chr14	8132783	8133230	transcript	Pxk	0.06851	0.0499	0.03247	0.0615	0.40442	0.11127	0.19754	0.17518	0.3611	0.06351	-1.61534	-0.33653	-0.84218	0.18593	-0.11166	-1.79051	-0.51171	-1.01736	-0.29759	-1.97644	-0.69763	-1.20329	-1.67885	-0.40005	-0.9057	1.27881	0.77315	-0.50565
chr13	43514950	43514959	+	chr13	43514811	43515642	NA	NA	0.18603	0.11364	0.09266	0.08967	0.49456	0.29076	0.30969	0.43105	0.58453	0.60779	-1.07093	-0.45803	-0.52727	0.15348	0.17674	-1.50198	-0.88908	-0.95832	0.02327	-1.65546	-1.04255	-1.1118	-1.67872	-1.06582	-1.13506	0.61291	0.54366	-0.06925
chr6	28723295	28723304	+	chr6	28723045	28723773	NA	NA	0.18093	0.19094	0.10449	0.10684	0.54897	0.4044	0.26336	-0.05155	0.46949	0.45253	-1.22494	-0.85765	-0.37801	0.52104	0.50408	-1.17339	-0.8061	-0.32646	-0.01696	-1.69443	-1.32715	-0.8475	-1.67747	-1.31019	-0.83055	0.36728	0.84693	0.47964
chr2	14631859	14631868	+	chr2	14631583	14632021	NA	NA	0.08153	0.07652	0.02397	0.05945	0.39719	0.13545	0.2115	0.04172	0.5723	0.19365	-1.48324	-0.38598	-0.79858	0.53058	0.15194	-1.52496	-0.4277	-0.8403	-0.37864	-2.05554	-0.95828	-1.37088	-1.6769	-0.57963	-0.99224	1.09726	0.68466	-0.4126
chr16	57482465	57482474	+	chr16	57482295	57482626	NA	NA	0.14925	0.02931	0.08995	0.06893	0.42748	0.25716	0.16769	0.97871	0.40265	0.57746	-1.09938	-0.52923	-0.10531	-0.57606	-0.40125	-2.07809	-1.50794	-1.08402	0.17481	-1.50203	-0.93188	-0.50796	-1.67684	-1.10669	-0.68277	0.57015	0.99407	0.42392
chr18	12224554	12224563	+	chr18	12223991	12224894	NA	NA	0.13955	0.10195	0.10633	0.1131	0.56861	0.19405	0.22646	0.25295	0.2211	0.17321	-1.50343	-0.3023	-0.45599	-0.03185	-0.07974	-1.75638	-0.55525	-0.70894	-0.04789	-1.72453	-0.52339	-0.67709	-1.67664	-0.4755	-0.6292	1.20113	1.04743	-0.1537
chr9	114742991	114743000	+	chr9	114742708	114743172	transcript	Cmtm6	0.13006	0.0619	0.03492	0.06286	0.40784	0.14589	0.21952	0.52256	0.79622	0.51372	-1.16245	-0.09838	-0.48421	0.27366	-0.00884	-1.68501	-0.62094	-1.00677	-0.2825	-1.95867	-0.8946	-1.28044	-1.67617	-0.6121	-0.99793	1.06407	0.67824	-0.38583
chr17	8225918	8225927	+	chr17	8225789	8226073	NA	NA	0.08694	0.02882	0.04697	0.02295	0.28018	0.08665	0.13872	0.55802	0.35956	0.62853	-1.04719	0.00231	-0.36264	-0.19847	0.07051	-1.60522	-0.55571	-0.92067	0.26897	-1.40675	-0.35725	-0.7222	-1.67572	-0.62622	-0.99117	1.0495	0.68455	-0.36495
chr8	75119951	75119960	+	chr8	75119356	75120095	CDS	Mcm5	0.08441	0.11839	0.04653	0.05789	0.39166	0.09858	0.1771	-0.2512	0.34377	0.23182	-1.44347	-0.11011	-0.60294	0.59497	0.48301	-1.19228	0.14108	-0.35174	-0.11196	-1.78725	-0.45389	-0.94671	-1.67529	-0.34193	-0.83476	1.33336	0.84053	-0.49283
chr15	97590972	97590981	+	chr15	97590520	97591136	NA	NA	0.74192	0.40562	0.18157	0.23565	0.9591	0.51871	0.64931	0.74224	1.60007	1.34177	-0.33312	0.448	0.16935	0.85783	0.59952	-1.07536	-0.29424	-0.5729	-0.2583	-1.93319	-1.15207	-1.43072	-1.67488	-0.89376	-1.17242	0.78112	0.50246	-0.27866
chr13	58443945	58443954	-	chr13	58443813	58444318	exon	Gm33875	0.21721	0.19271	0.09233	0.0835	0.47317	0.21874	0.33841	0.1182	0.73925	0.8092	-0.86537	-0.00707	-0.47419	0.62106	0.691	-0.98357	-0.12527	-0.59238	0.06994	-1.60462	-0.74632	-1.21344	-1.67457	-0.81627	-1.28338	0.8583	0.39118	-0.46712
chr3	52000335	52000344	-	chr3	52000053	52000488	NA	NA	0.39336	0.25809	0.16771	0.13717	0.64445	0.43359	0.60372	0.46876	0.89638	1.07521	-0.59926	-0.11437	-0.51744	0.42762	0.60645	-1.06802	-0.58313	-0.9862	0.17883	-1.49564	-1.01075	-1.41382	-1.67448	-1.18959	-1.59265	0.48489	0.08182	-0.40306
chr8	71296262	71296271	-	chr8	71296102	71297145	exon	Myo9b	0.09328	0.08734	0.046	0.07165	0.43528	0.28562	0.14702	0.04644	0.41912	0.17681	-1.49759	-1.01838	-0.36353	0.37268	0.13037	-1.54403	-1.06482	-0.40996	-0.24231	-1.91671	-1.43751	-0.78265	-1.6744	-1.19519	-0.54033	0.47921	1.13406	0.65486
chr12	84243264	84243273	-	chr12	84243010	84243682	NA	NA	0.14534	0.12007	0.10204	0.09394	0.50602	0.24229	0.20613	0.1608	0.28758	0.34838	-1.32504	-0.49021	-0.32622	0.12678	0.18758	-1.48585	-0.65101	-0.48702	0.0608	-1.61262	-0.77779	-0.6138	-1.67342	-0.83859	-0.6746	0.83483	0.99882	0.16399
chr13	100651080	100651089	-	chr13	100650519	100651705	transcript	Rad17	1.18466	1.26888	1.0714	0.93232	3.17938	2.17464	1.29733	-0.09201	0.13378	0.31708	-1.35598	-0.82707	-0.12181	0.22579	0.40909	-1.26397	-0.73506	-0.0298	0.1833	-1.48976	-0.96085	-0.25559	-1.67306	-1.14415	-0.43889	0.5289	1.23417	0.70526
chr12	17715931	17715940	+	chr12	17715574	17716373	exon	Gm40842	0.36209	0.34479	0.15987	0.14612	0.67221	0.38409	0.29503	0.05576	0.8446	0.92485	-0.7481	-0.06793	0.2293	0.78884	0.8691	-0.80386	-0.12368	0.17354	0.08025	-1.5927	-0.91253	-0.6153	-1.67295	-0.99278	-0.69555	0.68017	0.9774	0.29723
chr8	13992619	13992628	+	chr8	13992375	13992959	exon	Gm5907	0.09261	0.07917	0.06362	0.03883	0.3299	0.12847	0.09609	0.10769	0.24322	0.48966	-1.18262	-0.25327	-0.02662	0.13553	0.38198	-1.2903	-0.36096	-0.13431	0.24644	-1.42584	-0.49649	-0.26984	-1.67228	-0.74294	-0.51629	0.92934	1.156	0.22665
chr12	17531018	17531027	-	chr12	17530467	17531197	NA	NA	0.12094	0.07833	0.08012	0.09697	0.51518	0.20629	0.19161	0.31835	0.30346	0.17038	-1.50185	-0.48195	-0.4097	-0.01489	-0.14797	-1.8202	-0.80029	-0.72804	-0.13308	-1.80531	-0.78541	-0.71316	-1.67223	-0.65232	-0.58008	1.0199	1.09215	0.07225
chr1	170709576	170709585	+	chr1	170709434	170710233	3UTR	Atf6	0.1579	0.1641	0.0655	0.05784	0.39039	0.23624	0.2276	-0.03504	0.65847	0.72936	-0.94263	-0.39032	-0.35211	0.69351	0.7644	-0.90759	-0.35528	-0.31706	0.07089	-1.6011	-1.04879	-1.01057	-1.67199	-1.11968	-1.08146	0.55231	0.59053	0.03822
chr18	35740516	35740525	-	chr18	35739690	35740617	CDS	Sting1	0.39694	0.17901	0.19249	0.1139	0.5688	0.26352	0.33411	0.84601	0.77654	1.23866	-0.43284	0.45725	0.19746	-0.06947	0.39265	-1.27884	-0.38876	-0.64855	0.46212	-1.20937	-0.31929	-0.57908	-1.67149	-0.78141	-1.0412	0.89009	0.63029	-0.25979
chr19	17359659	17359668	-	chr19	17359367	17359943	NA	NA	0.27327	0.25127	0.25021	0.17573	0.76556	0.4116	0.26175	0.08905	0.09349	0.44497	-1.2262	-0.46089	0.04595	0.00443	0.35592	-1.31525	-0.54994	-0.04311	0.35148	-1.31968	-0.55437	-0.04754	-1.67117	-0.90586	-0.39902	0.76531	1.27214	0.50683
chr14	48131774	48131783	+	chr14	48131318	48131958	5UTR	Peli2	0.13479	0.07187	0.05826	0.08827	0.4869	0.20292	0.14284	0.46337	0.5867	0.32755	-1.34331	-0.37569	-0.04984	0.12332	-0.13583	-1.80668	-0.83906	-0.51321	-0.25915	-1.93001	-0.96238	-0.63653	-1.67086	-0.70323	-0.37738	0.96762	1.29348	0.32585
chr6	89421736	89421745	-	chr6	89421519	89422342	NA	NA	0.05689	0.08975	0.05415	0.06144	0.40126	0.17058	0.17788	-0.28382	0.02639	-0.04279	-1.71303	-0.80918	-0.84841	0.31021	0.24103	-1.42921	-0.52536	-0.56459	-0.06919	-1.73942	-0.83558	-0.8748	-1.67024	-0.76639	-0.80562	0.90385	0.86462	-0.03923
chr17	35870334	35870343	+	chr17	35870205	35870890	transcript	Ppp1r18	0.18852	0.2863	0.15653	0.18483	0.79393	0.41965	0.27239	-0.42846	0.17321	0.01895	-1.65122	-0.86186	-0.37474	0.60166	0.44741	-1.22277	-0.4334	0.05372	-0.15426	-1.82443	-1.03507	-0.54794	-1.67017	-0.88081	-0.39369	0.78936	1.27649	0.48712
chr1	87149463	87149472	+	chr1	87149281	87149799	CDS	Ecel1	0.07162	0.08817	0.0539	0.01505	0.25331	0.11939	0.11184	-0.13721	0.16299	0.60176	-1.06721	-0.36513	-0.31322	0.30021	0.73897	-0.93	-0.22792	-0.17601	0.43877	-1.2302	-0.52812	-0.47622	-1.66897	-0.96689	-0.91498	0.70208	0.75399	0.05191
chr10	125370191	125370200	-	chr10	125370007	125370553	5UTR	Slc16a7	0.22703	0.13464	0.07036	0.06382	0.40834	0.19222	0.25729	0.48918	0.96478	1.02327	-0.64555	0.16545	-0.12986	0.4756	0.53409	-1.13473	-0.32373	-0.61903	0.05849	-1.61033	-0.79933	-1.09464	-1.66882	-0.85782	-1.15313	0.811	0.51569	-0.2953
chr15	100732736	100732745	-	chr15	100732578	100732957	transcript	I730030J21Rik	0.49277	0.20478	0.14151	0.18008	0.77799	0.51045	0.5797	0.97312	1.31609	1.0975	-0.57132	-0.04281	-0.19923	0.34297	0.12438	-1.54443	-1.01593	-1.17235	-0.21859	-1.88741	-1.3589	-1.51532	-1.66881	-1.14031	-1.29673	0.52851	0.37208	-0.15642
chr1	156921743	156921752	+	chr1	156921619	156921890	NA	NA	0.15854	0.1654	0.06961	0.06416	0.4093	0.16407	0.21706	-0.03863	0.62548	0.67428	-0.9942	-0.03122	-0.30041	0.6641	0.7129	-0.95557	0.00741	-0.26178	0.0488	-1.61967	-0.6567	-0.92589	-1.66847	-0.7055	-0.97469	0.96298	0.69378	-0.26919
chr2	180726901	180726910	+	chr2	180726690	180727187	exon	Gm30455	0.34635	0.31411	0.24383	0.17245	0.75313	0.33123	0.43357	0.10963	0.3821	0.72425	-0.94354	0.05038	-0.26058	0.27248	0.61462	-1.05317	-0.05925	-0.3702	0.34215	-1.32564	-0.33173	-0.64268	-1.66779	-0.67387	-0.98483	0.99392	0.68296	-0.31095
chr11	94259996	94260005	-	chr11	94259866	94260209	exon	Gm38953	0.12044	0.18178	0.08201	0.1048	0.53808	0.25183	0.22067	-0.36257	0.28455	0.10912	-1.55842	-0.68885	-0.55273	0.64712	0.47169	-1.19585	-0.32628	-0.19016	-0.17543	-1.84297	-0.9734	-0.83728	-1.66755	-0.79797	-0.66185	0.86957	1.00569	0.13612
chr2	29673027	29673036	+	chr2	29672679	29673205	NA	NA	0.16843	0.25148	0.14577	0.1164	0.57484	0.47645	0.27274	-0.39634	0.13015	0.31846	-1.34889	-1.11943	-0.48243	0.52649	0.7148	-0.95255	-0.72309	-0.08609	0.18831	-1.47905	-1.24958	-0.61259	-1.66735	-1.43788	-0.80089	0.22947	0.86646	0.63699
chr3	93550211	93550220	-	chr3	93549944	93550343	NA	NA	0.8733	0.22562	0.23411	0.23824	0.96182	0.70427	0.62698	1.59685	1.55906	1.54103	-0.1263	0.27701	0.42388	-0.03779	-0.05583	-1.72315	-1.31984	-1.17297	-0.01803	-1.68536	-1.28205	-1.13518	-1.66732	-1.26402	-1.11715	0.40331	0.55017	0.14687
chr5	77373021	77373030	-	chr5	77372672	77373201	transcript	Igfbp7	0.09207	0.09566	0.07505	0.01357	0.24809	0.1754	0.23281	-0.02753	0.1382	0.78916	-0.87765	-0.53331	-0.81177	0.16573	0.81669	-0.85011	-0.50577	-0.78424	0.65096	-1.01585	-0.67151	-0.94997	-1.66681	-1.32246	-1.60093	0.34434	0.06587	-0.27847
chr17	26497835	26497844	-	chr17	26497274	26497954	exon	Gm34455	0.0785	0.02827	0.07254	0.14556	0.66714	0.23175	0.17487	0.49567	0.05065	-0.47321	-2.13995	-0.91619	-0.63956	-0.44502	-0.96887	-2.63562	-1.41185	-1.13523	-0.52386	-2.1906	-0.96684	-0.69022	-1.66674	-0.44298	-0.16636	1.22376	1.50039	0.27662
chr15	103462706	103462715	-	chr15	103462613	103462935	CDS	Nckap1l	0.07557	0.04161	0.01923	0.05444	0.37759	0.14005	0.11679	0.32189	0.58157	0.1917	-1.47429	-0.46435	-0.31351	0.25968	-0.13019	-1.79618	-0.78624	-0.6354	-0.38987	-2.05586	-1.04592	-0.89508	-1.66599	-0.65605	-0.50521	1.00994	1.16078	0.15084
chr7	132323600	132323609	+	chr7	132323421	132323784	transcript	Chst15	0.09088	0.0482	0.06076	0.03577	0.31815	0.18891	0.12543	0.37808	0.25618	0.50981	-1.15551	-0.61308	-0.24686	-0.12191	0.13172	-1.53359	-0.99116	-0.62495	0.25363	-1.41168	-0.86926	-0.50304	-1.66531	-1.12288	-0.75667	0.54243	0.90864	0.36621
chrX	103443907	103443916	-	chrX	103443830	103444088	NA	NA	0.23245	0.23774	0.117	0.1716	0.74892	0.24044	0.19271	-0.02317	0.62902	0.29735	-1.36786	-0.03486	0.18712	0.65219	0.32053	-1.34468	-0.01169	0.21029	-0.33166	-1.99687	-0.66387	-0.4419	-1.66521	-0.33221	-0.11024	1.333	1.55497	0.22198
chr3	79844181	79844190	+	chr3	79844008	79844323	5UTR	Tmem144	0.22997	0.19315	0.15143	0.11005	0.55349	0.17169	0.2413	0.17391	0.40019	0.66628	-0.99844	0.28587	-0.04955	0.22628	0.49237	-1.17235	0.11196	-0.22347	0.26609	-1.39863	-0.11432	-0.44975	-1.66473	-0.38041	-0.71584	1.28431	0.94889	-0.33543
chr11	80490061	80490070	-	chr11	80489650	80490349	exon	Cdk5r1	0.06997	0.09735	0.12499	0.03725	0.32255	0.16487	0.12821	-0.22247	-0.41688	0.32057	-1.34373	-0.65799	-0.43792	-0.19441	0.54303	-1.12126	-0.43552	-0.21545	0.73745	-0.92684	-0.24111	-0.02103	-1.66429	-0.97856	-0.75848	0.68573	0.90581	0.22007
chr13	40968765	40968774	-	chr13	40968444	40969067	transcript	Gcnt2	0.05183	0	0.02181	0.06245	0.40241	0.11164	0.1841	0.63219	0.33189	-0.10125	-1.7655	-0.49512	-0.93014	-0.30031	-0.73344	-2.39769	-1.12731	-1.56234	-0.43313	-2.09739	-0.827	-1.26203	-1.66425	-0.39387	-0.82889	1.27038	0.83536	-0.43503
chr3	126690830	126690839	+	chr3	126690662	126691240	5UTR	Camk2d	0.14939	0.06341	0.05623	0.03856	0.32667	0.13522	0.0959	0.62793	0.69518	0.87539	-0.7888	0.08645	0.35761	0.06724	0.24745	-1.41673	-0.54149	-0.27032	0.18021	-1.48397	-0.60873	-0.33757	-1.66418	-0.78894	-0.51777	0.87524	1.14641	0.27117
chr9	114742972	114742981	+	chr9	114742708	114743172	transcript	Cmtm6	0.1135	0.06545	0.03555	0.05346	0.37383	0.14528	0.21952	0.37948	0.67856	0.49208	-1.17191	-0.20536	-0.59486	0.29907	0.1126	-1.55139	-0.58484	-0.97434	-0.18648	-1.85046	-0.88392	-1.27342	-1.66399	-0.69744	-1.08694	0.96655	0.57705	-0.3895
chr5	124059847	124059856	+	chr5	124059683	124060185	3UTR	Abcb9	0.20064	0.1304	0.09079	0.06342	0.40539	0.25963	0.14299	0.3925	0.67234	0.90327	-0.76071	-0.26308	0.31383	0.27984	0.51077	-1.15321	-0.65558	-0.07867	0.23093	-1.43305	-0.93542	-0.35851	-1.66398	-1.16635	-0.58944	0.49763	1.07454	0.57691
chr7	127922553	127922562	-	chr7	127922219	127922814	CDS	Kat8	0.18931	0.12183	0.07233	0.06252	0.40249	0.1978	0.24331	0.39209	0.76744	0.855	-0.80884	-0.04256	-0.25149	0.37535	0.46292	-1.20093	-0.43465	-0.64358	0.08757	-1.57628	-0.81	-1.01893	-1.66384	-0.89757	-1.10649	0.76628	0.55735	-0.20893
chr2	37757221	37757230	-	chr2	37756902	37757379	NA	NA	0.1576	0.16463	0.04941	0.04061	0.33293	0.28248	0.21527	-0.03972	0.80991	0.9011	-0.76228	-0.58097	-0.29747	0.84963	0.94082	-0.72256	-0.54125	-0.25775	0.0912	-1.57219	-1.39087	-1.10737	-1.66338	-1.48207	-1.19857	0.18131	0.46481	0.2835
chr13	4191194	4191203	+	chr13	4190936	4191432	5UTR	Akr1c13	0.31246	0.36569	0.2498	0.14597	0.66653	0.32252	0.29021	-0.17745	0.24138	0.75964	-0.90348	-0.03525	0.08117	0.41883	0.93709	-0.72603	0.14219	0.25861	0.51826	-1.14486	-0.27663	-0.16022	-1.66312	-0.7949	-0.67848	0.86823	0.98465	0.11642
chr15	3234347	3234356	-	chr15	3233932	3234477	NA	NA	0.08946	0.04294	0	0.04227	0.33774	0.2109	0.16617	0.42125	0.96287	0.42832	-1.23357	-0.73209	-0.50341	0.54161	0.00706	-1.65482	-1.15334	-0.92466	-0.53455	-2.19643	-1.69495	-1.46628	-1.66189	-1.16041	-0.93173	0.50148	0.73016	0.22868
chr4	141272914	141272923	+	chr4	141272821	141273612	NA	NA	0.09189	0.03615	0.05345	0.04107	0.33394	0.26308	0.11455	0.51344	0.33372	0.46001	-1.20186	-0.94087	-0.16573	-0.17973	-0.05343	-1.71531	-1.45431	-0.67918	0.12629	-1.53558	-1.27459	-0.49945	-1.66188	-1.40088	-0.62575	0.26099	1.03613	0.77514
chr10	44029689	44029698	+	chr10	44029549	44029980	NA	NA	0.06155	0.04763	0.01503	0.04342	0.34135	0.11914	0.10781	0.13502	0.51167	0.17848	-1.48331	-0.4538	-0.37509	0.37664	0.04346	-1.61833	-0.58882	-0.51011	-0.33318	-1.99497	-0.96546	-0.88675	-1.66179	-0.63228	-0.55357	1.02951	1.10822	0.07871
chr9	111094756	111094765	-	chr9	111094621	111095012	NA	NA	0.09348	0.05188	0.06774	0.04414	0.34343	0.12491	0.12067	0.36141	0.21275	0.43992	-1.22122	-0.22333	-0.19514	-0.14865	0.07851	-1.58262	-0.58473	-0.55655	0.22717	-1.43397	-0.43608	-0.40789	-1.66114	-0.66324	-0.63506	0.99789	1.02608	0.02818
chr16	91546585	91546594	-	chr16	91546322	91546760	5UTR	Ifngr2	0.47732	0.6807	0.66348	0.33128	1.25008	0.78457	0.69886	-0.43917	-0.40675	0.42567	-1.23389	-0.62064	-0.47259	0.03242	0.86484	-0.79471	-0.18146	-0.03342	0.83242	-0.82713	-0.21388	-0.06584	-1.65955	-1.04631	-0.89826	0.61325	0.76129	0.14805
chr3	105046965	105046974	+	chr3	105046793	105047306	5UTR	Cttnbp2nl	0.04866	0.07867	0.05076	0.08097	0.45926	0.18348	0.26748	-0.275	-0.02105	-0.29406	-1.9535	-0.95858	-1.33981	0.25395	-0.01906	-1.6785	-0.68358	-1.06481	-0.27302	-1.93246	-0.93753	-1.31876	-1.65944	-0.66452	-1.04575	0.99493	0.6137	-0.38123
chr15	75876124	75876133	-	chr15	75875695	75876269	3UTR	Mroh6	0.08098	0.09213	0.06362	0.0406	0.33173	0.1001	0.07464	-0.089	0.15051	0.37789	-1.28154	-0.14941	0.05317	0.23951	0.46689	-1.19254	-0.06041	0.14216	0.22738	-1.43205	-0.29992	-0.09735	-1.65943	-0.5273	-0.32473	1.13213	1.3347	0.20257
chr5	140379504	140379513	+	chr5	140379148	140379696	CDS	Snx8	0.12652	0.16271	0.07295	0.03993	0.32947	0.17907	0.12938	-0.219	0.40097	0.71837	-0.94057	-0.30805	-0.01857	0.61997	0.93737	-0.72157	-0.08905	0.20043	0.31741	-1.34154	-0.70902	-0.41954	-1.65894	-1.02642	-0.73694	0.63252	0.922	0.28948
chr4	138408010	138408019	-	chr4	138407421	138408646	NA	NA	0.30951	0.33627	0.27343	0.11561	0.56832	0.42662	0.34745	-0.09258	0.13505	0.94407	-0.71457	-0.36743	-0.12957	0.22763	1.03665	-0.62199	-0.27484	-0.03699	0.80902	-0.84962	-0.50247	-0.26462	-1.65865	-1.3115	-1.07364	0.34715	0.58501	0.23786
chr1	54798596	54798605	+	chr1	54798377	54798956	NA	NA	0.06258	0.02458	0.03627	0.04716	0.35214	0.12033	0.13194	0.4003	0.26493	0.14932	-1.5091	-0.45231	-0.52833	-0.13537	-0.25099	-1.90941	-0.85262	-0.92864	-0.11561	-1.77403	-0.71724	-0.79326	-1.65842	-0.60163	-0.67765	1.05679	0.98077	-0.07602
chr13	37844015	37844024	+	chr13	37843480	37844374	NA	NA	0.34741	0.2243	0.2888	0.16136	0.71258	0.45408	0.32066	0.47142	0.2054	0.78899	-0.86933	-0.31211	0.09014	-0.26601	0.31758	-1.34074	-0.78352	-0.38128	0.58359	-1.07473	-0.51751	-0.11527	-1.65832	-1.1011	-0.69885	0.55722	0.95947	0.40225
chr18	38590385	38590394	+	chr18	38590070	38590655	CDS	Spry4	0.07204	0.11011	0.04376	0.02856	0.29338	0.13752	0.10517	-0.29741	0.26893	0.43727	-1.22098	-0.47899	-0.26211	0.56634	0.73468	-0.92357	-0.18158	0.0353	0.16834	-1.48991	-0.74792	-0.53104	-1.65825	-0.91627	-0.69938	0.74199	0.95887	0.21688
chr3	154177880	154177889	-	chr3	154177700	154178205	CDS	Slc44a5	0.12504	0.10545	0.05617	0.03113	0.30133	0.25693	0.18803	0.13501	0.54384	0.80653	-0.85113	-0.67937	-0.36429	0.40884	0.67153	-0.98614	-0.81438	-0.49929	0.26269	-1.39497	-1.22321	-0.90813	-1.65766	-1.4859	-1.17082	0.17176	0.48684	0.31508
chr9	40582162	40582171	+	chr9	40581777	40582308	NA	NA	0.11469	0.12355	0.03009	0.10277	0.52733	0.19647	0.23219	-0.05992	0.7488	0.08475	-1.57285	-0.47654	-0.64373	0.80871	0.14466	-1.51294	-0.41663	-0.58381	-0.66405	-2.32165	-1.22534	-1.39253	-1.6576	-0.56129	-0.72848	1.09631	0.92912	-0.16719
chr6	108630856	108630865	+	chr6	108630666	108631044	NA	NA	0.08299	0.07276	0.07805	0.05386	0.37282	0.13405	0.14853	0.08577	0.04078	0.25904	-1.39793	-0.36523	-0.45395	-0.04499	0.17327	-1.4837	-0.451	-0.53972	0.21825	-1.43872	-0.40601	-0.49473	-1.65697	-0.62426	-0.71298	1.03271	0.94399	-0.08872
chr7	75686731	75686740	+	chr7	75686036	75686869	CDS	Akap13	0.09318	0.10616	0.08273	0.04003	0.32916	0.10338	0.12396	-0.0966	0.08277	0.48111	-1.1757	-0.07645	-0.21937	0.17937	0.57771	-1.0791	0.02015	-0.12276	0.39834	-1.25847	-0.15922	-0.30213	-1.65681	-0.55756	-0.70047	1.09925	0.95634	-0.14292
chr10	80105609	80105618	-	chr10	80105392	80105814	5UTR	Sbno2	0.11612	0.04751	0.08754	0.06252	0.39993	0.19466	0.20413	0.56948	0.21066	0.42428	-1.23211	-0.45769	-0.50422	-0.35882	-0.1452	-1.80159	-1.02717	-1.0737	0.21362	-1.44276	-0.66835	-0.71488	-1.65639	-0.88197	-0.9285	0.77442	0.72789	-0.04653
chr10	121682798	121682807	-	chr10	121682621	121682875	CDS	D930020B18Rik	0.0247	0.03842	0.0001	0	0.20275	0.09794	0.06267	-0.15749	0.33426	0.33579	-1.32011	-0.69218	-0.39967	0.49175	0.49328	-1.16262	-0.53469	-0.24219	0.00153	-1.65437	-1.02644	-0.73393	-1.6559	-1.02797	-0.73546	0.62793	0.92043	0.2925
chr16	59604338	59604347	+	chr16	59604099	59604447	3UTR	Arl6	0.12074	0.08046	0.03759	0.04989	0.35994	0.15403	0.18963	0.29931	0.70548	0.5768	-1.07903	-0.2077	-0.40101	0.40617	0.27749	-1.37833	-0.50701	-0.70032	-0.12868	-1.78451	-0.91318	-1.10649	-1.65583	-0.7845	-0.97781	0.87133	0.67801	-0.19331
chr13	16012445	16012454	+	chr13	16012186	16012752	5UTR	Inhba	1.0293	0.47504	0.40832	0.30094	1.15064	1.07551	0.47718	0.98083	1.16067	1.50745	-0.14795	-0.05815	0.97542	0.17984	0.52662	-1.12878	-1.03898	-0.00541	0.34678	-1.30862	-1.21882	-0.18525	-1.6554	-1.56559	-0.53203	0.08981	1.12337	1.03356
chr11	103344723	103344732	+	chr11	103344413	103344839	5UTR	Arhgap27	0.26058	0.16037	0.10477	0.14324	0.65381	0.3201	0.13084	0.47878	0.83421	0.57926	-1.07603	-0.22372	0.65663	0.35543	0.10048	-1.55481	-0.7025	0.17784	-0.25495	-1.91024	-1.05794	-0.17759	-1.65529	-0.80298	0.07736	0.8523	1.73265	0.88035
chr13	15759282	15759291	-	chr13	15758991	15759653	NA	NA	0.56323	0.48253	0.25756	0.301	1.1507	0.54741	0.5648	0.18893	0.90215	0.73418	-0.92107	0.03514	-0.00344	0.71322	0.54526	-1.10999	-0.15379	-0.19237	-0.16797	-1.82322	-0.86701	-0.90559	-1.65525	-0.69904	-0.73762	0.95621	0.91763	-0.03858
chr2	11332654	11332663	-	chr2	11332531	11332867	exon	8030442B05Rik	0.12017	0.14926	0.08197	0.07523	0.43957	0.2512	0.1597	-0.18354	0.28306	0.33932	-1.31591	-0.68804	-0.2441	0.4666	0.52287	-1.13237	-0.5045	-0.06056	0.05626	-1.59898	-0.9711	-0.52717	-1.65524	-1.02736	-0.58343	0.62788	1.07181	0.44393
chr11	22666236	22666245	-	chr11	22665968	22666921	transcript	Gm40816	0.16712	0.12434	0.06673	0.06357	0.40281	0.18395	0.25819	0.25787	0.69921	0.72781	-0.92733	-0.09003	-0.43128	0.44135	0.46995	-1.18519	-0.3479	-0.68915	0.0286	-1.62654	-0.78924	-1.1305	-1.65514	-0.81784	-1.1591	0.8373	0.49604	-0.34126
chr13	113636159	113636168	-	chr13	113635568	113636297	NA	NA	0.18875	0.16125	0.19102	0.15918	0.70308	0.31539	0.28195	0.14748	-0.01153	0.15921	-1.49437	-0.53355	-0.4107	-0.159	0.01174	-1.64185	-0.68103	-0.55818	0.17074	-1.48285	-0.52203	-0.39917	-1.65359	-0.69277	-0.56991	0.96082	1.08368	0.12286
chr10	121488699	121488708	+	chr10	121488660	121489011	exon	Gm40787	0.06734	0.04219	0.05762	0.04267	0.33646	0.09004	0.10436	0.24407	0.0895	0.239	-1.41438	-0.18964	-0.2976	-0.15457	-0.00507	-1.65845	-0.43371	-0.54167	0.1495	-1.50388	-0.27914	-0.3871	-1.65338	-0.42864	-0.53661	1.22474	1.11678	-0.10796
chr2	168884765	168884774	+	chr2	168884676	168885068	3UTR	Zfp64	0.08711	0.02462	0	0.02051	0.26667	0.08268	0.11404	0.60947	0.94429	0.66024	-0.99282	0.03568	-0.19974	0.33482	0.05076	-1.60229	-0.57379	-0.80921	-0.28406	-1.93711	-0.90861	-1.14403	-1.65306	-0.62456	-0.85997	1.0285	0.79309	-0.23541
chr1	171272271	171272280	+	chr1	171272107	171272389	exon	B4galt3	0.1808	0.09408	0.11269	0.07831	0.44834	0.23501	0.1988	0.54643	0.41048	0.6726	-0.98017	-0.25953	-0.09145	-0.13595	0.12616	-1.5266	-0.80596	-0.63788	0.26211	-1.39065	-0.67001	-0.50193	-1.65276	-0.93213	-0.76405	0.72064	0.88872	0.16808
chr4	136832770	136832779	-	chr4	136832604	136832871	CDS	Ephb2	0.11073	0.10791	0.05921	0.04267	0.33623	0.19664	0.18904	0.01999	0.41762	0.58215	-1.07046	-0.50499	-0.4668	0.39763	0.56216	-1.09045	-0.52498	-0.48678	0.16453	-1.48808	-0.92261	-0.88442	-1.65261	-1.08714	-1.04895	0.56547	0.60367	0.03819
chr18	82812481	82812490	-	chr18	82812286	82812755	NA	NA	0.45852	0.16135	0.21753	0.33284	1.24849	0.48982	0.29503	1.11279	0.82615	0.37214	-1.28043	-0.07946	0.50587	-0.28664	-0.74065	-2.39322	-1.19225	-0.60692	-0.45401	-2.10658	-0.90561	-0.32028	-1.65257	-0.4516	0.13373	1.20097	1.7863	0.58533
chr8	122474339	122474348	-	chr8	122473878	122474543	5UTR	Rnf166	0.20698	0.20227	0.20056	0.17046	0.73797	0.24326	0.35845	0.02274	0.03108	0.18645	-1.4661	-0.16406	-0.58769	0.00834	0.16372	-1.48884	-0.1868	-0.61043	0.15537	-1.49718	-0.19514	-0.61877	-1.65255	-0.35052	-0.77414	1.30203	0.87841	-0.42363
chr12	85969784	85969793	+	chr12	85969509	85970347	transcript	Ttll5	0.41975	0.22823	0.20918	0.16027	0.70581	0.44579	0.38656	0.67256	0.7604	1.01399	-0.63834	-0.0713	0.0963	0.08785	0.34143	-1.3109	-0.74386	-0.57626	0.25358	-1.39874	-0.8317	-0.6641	-1.65233	-1.08529	-0.91769	0.56704	0.73464	0.1676
chr3	136326120	136326129	+	chr3	136325888	136326274	transcript	Bank1	0.06021	0.04129	0.0612	0.04441	0.34148	0.17151	0.17752	0.18851	-0.00922	0.15568	-1.4962	-0.78289	-0.81515	-0.19773	-0.03283	-1.68472	-0.97141	-1.00367	0.1649	-1.48698	-0.77367	-0.80594	-1.65188	-0.93857	-0.97083	0.71331	0.68105	-0.03226
chr10	125995046	125995055	-	chr10	125994818	125995214	CDS	Lrig3	0.33014	0.26831	0.1152	0.20059	0.83185	0.38878	0.3298	0.22717	1.01878	0.52546	-1.12578	-0.18672	0.00116	0.79161	0.29829	-1.35295	-0.41389	-0.22601	-0.49333	-2.14456	-1.20551	-1.01763	-1.65124	-0.71218	-0.5243	0.93906	1.12693	0.18788
chr8	26698843	26698852	-	chr8	26698475	26698955	transcript	Gm32098	0.07764	0.02252	0.01388	0.02224	0.27137	0.14098	0.12647	0.55782	0.66872	0.56128	-1.08886	-0.45259	-0.36073	0.1109	0.00346	-1.64668	-1.0104	-0.91855	-0.10744	-1.75758	-1.12131	-1.02945	-1.65014	-1.01387	-0.92201	0.63627	0.72813	0.09185
chr7	139295849	139295858	+	chr7	139295668	139296088	exon	Gm32486	0.17512	0.12588	0.07445	0.06492	0.4051	0.29178	0.18411	0.29123	0.67513	0.75902	-0.89046	-0.51912	-0.04736	0.3839	0.46779	-1.1817	-0.81036	-0.3386	0.08389	-1.56559	-1.19425	-0.72249	-1.64948	-1.27814	-0.80638	0.37134	0.8431	0.47176
chr19	61244846	61244855	-	chr19	61244724	61245082	NA	NA	0.04392	0.0489	0.02257	0.04384	0.33896	0.1768	0.14332	-0.05108	0.24216	0.00084	-1.64862	-0.97211	-0.78191	0.29324	0.05192	-1.59754	-0.92103	-0.73082	-0.24132	-1.89078	-1.21427	-1.02407	-1.64946	-0.97295	-0.78274	0.67651	0.86671	0.19021
chr4	155201366	155201375	-	chr4	155200658	155201436	NA	NA	0.15565	0.09603	0.04946	0.06727	0.41242	0.12418	0.18882	0.39323	0.79819	0.62964	-1.0197	0.19418	-0.17981	0.40496	0.23641	-1.41292	-0.19905	-0.57303	-0.16855	-1.81789	-0.60401	-0.978	-1.64933	-0.43546	-0.80945	1.21388	0.83989	-0.37399
chr18	80224507	80224516	-	chr18	80224284	80224602	3UTR	Txnl4a	0.28564	0.40863	0.26195	0.22196	0.89727	0.48883	0.38505	-0.40463	0.09289	0.2647	-1.38406	-0.61811	-0.33535	0.49753	0.66933	-0.97943	-0.21348	0.06929	0.1718	-1.47695	-0.71101	-0.42824	-1.64876	-0.88281	-0.60005	0.76595	1.04871	0.28276
chr5	66069999	66070008	+	chr5	66069531	66070182	NA	NA	0.82142	0.82296	0.76179	0.51694	1.82075	1.14392	0.82687	-0.00242	0.09715	0.58321	-1.06444	-0.43531	-0.00856	0.09957	0.58563	-1.06202	-0.43289	-0.00614	0.48606	-1.16159	-0.53246	-0.10571	-1.64765	-1.01852	-0.59177	0.62913	1.05588	0.42675
chr3	60080806	60080815	+	chr3	60080584	60081277	5UTR	Sucnr1	0.07177	0.06456	0.03777	0.01216	0.23875	0.12581	0.23194	0.06406	0.3306	0.64172	-1.00417	-0.40654	-0.97436	0.26655	0.57767	-1.06822	-0.4706	-1.03841	0.31112	-1.33477	-0.73714	-1.30496	-1.64589	-1.04826	-1.61608	0.59763	0.02981	-0.56782
chr3	68794526	68794535	-	chr3	68794442	68794680	NA	NA	0.0906	0.0364	0.0424	0.02784	0.28773	0.11536	0.07495	0.50065	0.43587	0.59841	-1.04714	-0.18135	0.12763	-0.06478	0.09776	-1.54779	-0.682	-0.37302	0.16254	-1.48301	-0.61722	-0.30824	-1.64555	-0.77976	-0.47078	0.86579	1.17477	0.30898
chr2	75792628	75792637	+	chr2	75792387	75792954	transcript	Gm13657	0.3536	0.35598	0.31697	0.21094	0.86045	0.42733	0.29378	-0.00765	0.12311	0.55331	-1.09203	-0.21987	0.20685	0.13075	0.56095	-1.08439	-0.21223	0.21449	0.4302	-1.21514	-0.34298	0.08374	-1.64534	-0.77318	-0.34646	0.87216	1.29888	0.42672
chr16	96625099	96625108	+	chr16	96624584	96625354	CDS	Dscam	0.11358	0.06707	0.03793	0.0369	0.31595	0.16822	0.13729	0.36548	0.6529	0.66419	-0.98092	-0.33675	-0.15586	0.28742	0.29871	-1.3464	-0.70223	-0.52134	0.01129	-1.63382	-0.98965	-0.80876	-1.64511	-1.00093	-0.82004	0.64417	0.82507	0.18089
chr7	140134238	140134247	+	chr7	140134086	140134350	3UTR	Paox	0.17501	0.15809	0.0484	0.0662	0.40721	0.30984	0.22075	0.09363	0.91652	0.74688	-0.89713	-0.58568	-0.22635	0.82289	0.65325	-0.99077	-0.67931	-0.31998	-0.16964	-1.81365	-1.5022	-1.14287	-1.64401	-1.33255	-0.97323	0.31146	0.67078	0.35932
chr5	23894422	23894431	+	chr5	23894036	23894665	NA	NA	0.23006	0.16482	0.24743	0.13558	0.62384	0.48857	0.25972	0.32403	-0.07527	0.49681	-1.14679	-0.84568	-0.12625	-0.3993	0.17277	-1.47082	-1.16971	-0.45029	0.57208	-1.07152	-0.7704	-0.05098	-1.6436	-1.34248	-0.62306	0.30111	1.02054	0.71942
chr4	98465703	98465712	-	chr4	98465513	98465812	5UTR	Patj	0.07628	0.04008	0.02866	0.0528	0.36484	0.08781	0.11346	0.34424	0.47242	0.21372	-1.42875	-0.09439	-0.28455	0.12818	-0.13053	-1.773	-0.43863	-0.62879	-0.2587	-1.90117	-0.56681	-0.75697	-1.64247	-0.30811	-0.49826	1.33436	1.14421	-0.19016
chr5	114100264	114100273	-	chr5	114099815	114101175	exon	Usp30	0.76808	0.51696	0.73629	0.54038	1.88562	1.05837	0.69212	0.49657	0.05419	0.44232	-1.19909	-0.4186	0.13303	-0.44238	-0.05425	-1.69567	-0.91518	-0.36354	0.38813	-1.25328	-0.4728	0.07884	-1.64142	-0.86093	-0.30929	0.78049	1.33213	0.55164
chr12	112870989	112870998	+	chr12	112870851	112871140	exon	1700127F24Rik	0.28914	0.2276	0.12463	0.14374	0.64794	0.45172	0.3057	0.25242	0.80867	0.68791	-0.95298	-0.51001	-0.06101	0.55625	0.43549	-1.2054	-0.76243	-0.31343	-0.12076	-1.76165	-1.31868	-0.86968	-1.64089	-1.19792	-0.74892	0.44297	0.89197	0.449
chr7	3442955	3442964	-	chr7	3442328	3443082	transcript	Cacng6	0.08969	0.09015	0.05279	0.03859	0.31969	0.23827	0.11125	-0.0036	0.32303	0.46955	-1.17019	-0.85421	-0.1599	0.32663	0.47315	-1.16658	-0.8506	-0.1563	0.14652	-1.49321	-1.17723	-0.48293	-1.63973	-1.32375	-0.62945	0.31598	1.01028	0.6943
chr14	75034393	75034402	-	chr14	75034171	75034645	transcript	Rubcnl	0.45082	0.20847	0.1234	0.20699	0.84438	0.47128	0.4839	0.84846	1.32443	0.85553	-0.78412	-0.05316	-0.085	0.47597	0.00707	-1.63257	-0.90162	-0.93346	-0.4689	-2.10855	-1.37759	-1.40943	-1.63964	-0.90869	-0.94053	0.73095	0.69911	-0.03184
chr17	81104515	81104524	-	chr17	81104258	81104653	NA	NA	0.07073	0.04344	0.03947	0.0914	0.48418	0.17037	0.18908	0.26087	0.30308	-0.17029	-1.80985	-0.68163	-0.78019	0.04221	-0.43116	-2.07072	-0.9425	-1.04106	-0.47337	-2.11293	-0.98471	-1.08327	-1.63956	-0.51134	-0.6099	1.12822	1.02966	-0.09856
chr1	92080343	92080352	+	chr1	92079776	92080609	NA	NA	0.44142	0.20615	0.15643	0.11573	0.55975	0.43442	0.55865	0.83446	1.0955	1.35109	-0.28795	0.01898	-0.28552	0.26104	0.51663	-1.12241	-0.81548	-1.11998	0.25559	-1.38344	-1.07652	-1.38102	-1.63904	-1.33212	-1.63661	0.30692	0.00243	-0.30449
chr7	101378128	101378137	+	chr7	101377663	101378241	5UTR	Arap1	0.57337	0.36039	0.22212	0.26791	1.03344	0.58097	0.42729	0.5543	1.07741	0.8824	-0.75627	-0.01633	0.35625	0.52311	0.3281	-1.31057	-0.57063	-0.19805	-0.19501	-1.83369	-1.09374	-0.72117	-1.63867	-0.89873	-0.52615	0.73994	1.11252	0.37258
chr8	3711912	3711921	-	chr8	3711431	3712214	exon	Gm16553	0.11837	0.13676	0.07857	0.0462	0.34306	0.2271	0.17796	-0.11968	0.29901	0.59822	-1.04038	-0.59587	-0.35644	0.41869	0.7179	-0.9207	-0.47619	-0.23676	0.29921	-1.33939	-0.89488	-0.65545	-1.6386	-1.19409	-0.95466	0.44451	0.68394	0.23943
chr3	97211409	97211418	-	chr3	97211067	97211730	CDS	Bcl9	0.23421	0.16233	0.14982	0.19671	0.81153	0.48841	0.17047	0.35631	0.42842	0.1749	-1.46344	-0.82694	0.31125	0.07211	-0.18141	-1.81975	-1.18325	-0.04506	-0.25353	-1.89187	-1.25536	-0.11717	-1.63834	-1.00183	0.13635	0.63651	1.77469	1.13819
chr4	140905452	140905461	-	chr4	140905337	140906459	5UTR	Padi2	0.16528	0.13893	0.07736	0.09096	0.48183	0.25261	0.18921	0.15446	0.59677	0.48674	-1.15037	-0.41845	-0.12724	0.44231	0.33228	-1.30483	-0.57291	-0.2817	-0.11003	-1.74714	-1.01522	-0.72401	-1.63711	-0.90519	-0.61398	0.73192	1.02312	0.29121
chr2	58357787	58357796	+	chr2	58357097	58358337	transcript	Acvr1c	0.31965	0.1967	0.12399	0.09624	0.49817	0.40726	0.28956	0.50851	0.92337	1.11957	-0.51734	-0.277	0.10889	0.41486	0.61106	-1.02585	-0.78551	-0.39962	0.1962	-1.4407	-1.20036	-0.81448	-1.63691	-1.39656	-1.01068	0.24034	0.62623	0.38589
chr15	97520578	97520587	+	chr15	97520003	97520763	NA	NA	0.06112	0.0656	0.05726	0	0.1988	0.17582	0.08463	-0.04101	0.03629	0.72114	-0.91544	-0.79763	-0.20328	0.07731	0.76215	-0.87443	-0.75661	-0.16227	0.68485	-0.95173	-0.83392	-0.23958	-1.63658	-1.51877	-0.92443	0.11781	0.71215	0.59434
chr1	51934854	51934863	+	chr1	51934183	51934883	exon	Gm8419	0.10306	0.0575	0.04861	0.04008	0.32338	0.08345	0.12039	0.37877	0.46586	0.55468	-1.08176	0.15102	-0.12145	0.08709	0.17591	-1.46053	-0.22775	-0.50022	0.08882	-1.54762	-0.31484	-0.58732	-1.63644	-0.40366	-0.67614	1.23278	0.96031	-0.27248
chr2	32882900	32882909	+	chr2	32881643	32882991	exon	Gm13523	0.19357	0.30242	0.17216	0.06163	0.39019	0.46222	0.21011	-0.46277	0.11152	0.88473	-0.75115	-0.95114	-0.08061	0.57429	1.3475	-0.28838	-0.48836	0.38216	0.77321	-0.86267	-1.06266	-0.19213	-1.63588	-1.83587	-0.96534	-0.19999	0.67054	0.87053
chr1	80665367	80665376	-	chr1	80665004	80665570	transcript	Dock10	0.17261	0.29043	0.11882	0.11392	0.55264	0.27986	0.1732	-0.52758	0.32476	0.35832	-1.27744	-0.48738	-0.00319	0.85233	0.8859	-0.74986	0.0402	0.52439	0.03357	-1.60219	-0.81214	-0.32794	-1.63576	-0.8457	-0.36151	0.79006	1.27425	0.48419
chr2	144245494	144245503	-	chr2	144245451	144245871	3UTR	Snx5	0.05628	0.11823	0.14929	0.07747	0.43933	0.15928	0.11253	-0.49728	-0.69411	-0.19001	-1.82565	-0.75211	-0.45805	-0.19683	0.30727	-1.32838	-0.25483	0.03923	0.5041	-1.13155	-0.058	0.23606	-1.63565	-0.5621	-0.26804	1.07355	1.36761	0.29406
chr15	88861921	88861930	-	chr15	88861689	88862577	CDS	Gm33049	0.61695	0.49347	0.61452	0.30052	1.13238	0.61456	0.6066	0.27513	0.00494	0.84924	-0.78637	0.00486	0.02115	-0.27019	0.57412	-1.0615	-0.27027	-0.25398	0.84431	-0.79131	-8e-05	0.01621	-1.63562	-0.84439	-0.82809	0.79123	0.80752	0.01629
chr11	58092763	58092772	-	chr11	58092322	58093288	transcript	Gm12248	0.1958	0.20114	0.11759	0.08352	0.45811	0.23614	0.14764	-0.02632	0.45333	0.70629	-0.92931	-0.18787	0.26195	0.47965	0.73261	-0.90299	-0.16155	0.28827	0.25296	-1.38263	-0.64119	-0.19138	-1.6356	-0.89416	-0.44434	0.74144	1.19126	0.44982
chr11	120518249	120518258	-	chr11	120518165	120518446	transcript	Gm39490	0.11579	0.11341	0.07666	0.13538	0.61924	0.22173	0.19096	0.01644	0.29743	-0.12865	-1.76423	-0.58917	-0.44136	0.28099	-0.14509	-1.78067	-0.60561	-0.4578	-0.42607	-2.06166	-0.8866	-0.73879	-1.63558	-0.46052	-0.31271	1.17506	1.32287	0.14781
chr9	122122399	122122408	+	chr9	122122175	122122466	5UTR	Snrk	0.07804	0.04375	0.02128	0.04595	0.34134	0.11702	0.16597	0.32017	0.57657	0.29735	-1.33813	-0.29425	-0.59489	0.2564	-0.02282	-1.6583	-0.61442	-0.91506	-0.27922	-1.9147	-0.87082	-1.17146	-1.63548	-0.5916	-0.89225	1.04388	0.74324	-0.30064
chr5	139830884	139830893	-	chr5	139830724	139830958	NA	NA	0.47097	0.34061	0.22356	0.20085	0.82241	0.46033	0.57304	0.37826	0.83065	0.93761	-0.69757	0.02742	-0.2395	0.45239	0.55935	-1.07584	-0.35084	-0.61776	0.10696	-1.52822	-0.80323	-1.07015	-1.63518	-0.91019	-1.17711	0.72499	0.45807	-0.26692
chr11	24185132	24185141	-	chr11	24184816	24185423	NA	NA	0.31777	0.18553	0.18428	0.122	0.57705	0.23107	0.26389	0.55842	0.56488	0.93001	-0.70424	0.34085	0.20219	0.00646	0.37159	-1.26266	-0.21757	-0.35623	0.36513	-1.26912	-0.22403	-0.36269	-1.63426	-0.58916	-0.72782	1.0451	0.90643	-0.13866
chr8	47917883	47917892	-	chr8	47917176	47918107	CDS	Wwc2	0.11625	0.06941	0.05347	0.04404	0.33497	0.11753	0.20835	0.36312	0.51096	0.60612	-1.0279	-0.00875	-0.52359	0.14784	0.243	-1.39102	-0.37186	-0.88671	0.09517	-1.53885	-0.5197	-1.03455	-1.63402	-0.61487	-1.12972	1.01915	0.50431	-0.51485
chr2	144642189	144642198	-	chr2	144641908	144642390	CDS	Dtd1	0.16681	0.09637	0.08933	0.08268	0.45482	0.19663	0.22617	0.45368	0.50797	0.5612	-1.07261	-0.15604	-0.29558	0.05429	0.10752	-1.52629	-0.60972	-0.74926	0.05323	-1.58058	-0.66402	-0.80356	-1.63381	-0.71725	-0.85679	0.91657	0.77703	-0.13954
chr2	79056230	79056239	+	chr2	79056149	79056413	NA	NA	0.01858	0.04159	0.01796	0	0.19798	0.04972	0.11791	-0.26776	0.00795	0.25959	-1.37295	-0.35162	-0.911	0.27571	0.52734	-1.1052	-0.08386	-0.64324	0.25164	-1.3809	-0.35957	-0.91895	-1.63254	-0.6112	-1.17059	1.02134	0.46195	-0.55938
chr2	173528742	173528751	-	chr2	173528534	173528861	transcript	1700021F07Rik	0	0.00223	0.00013	0.01239	0.23639	0.0409	0.10069	-0.03374	-0.00199	-0.17818	-1.8107	-0.52	-1.04847	0.03175	-0.14445	-1.77696	-0.48626	-1.01473	-0.1762	-1.80871	-0.51801	-1.04648	-1.63251	-0.34181	-0.87028	1.2907	0.76223	-0.52847
chr11	109420301	109420310	-	chr11	109419904	109420954	NA	NA	0.26357	0.38142	0.28308	0.23466	0.92544	0.40069	0.33773	-0.41073	-0.07659	0.12154	-1.51082	-0.46802	-0.27173	0.33413	0.53227	-1.1001	-0.05729	0.139	0.19813	-1.43423	-0.39143	-0.19514	-1.63237	-0.58956	-0.39327	1.04281	1.23909	0.19629
chr3	98157260	98157269	+	chr3	98157002	98157407	transcript	Notch2	0.05864	0.10751	0.05523	0.02991	0.29054	0.14306	0.13613	-0.40015	0.03254	0.30029	-1.33158	-0.63428	-0.59152	0.43269	0.70044	-0.93143	-0.23413	-0.19138	0.26775	-1.36412	-0.66682	-0.62406	-1.63187	-0.93457	-0.89182	0.6973	0.74006	0.04276
chr3	95650821	95650830	-	chr3	95650436	95651200	NA	NA	0.08156	0.2026	0.13347	0.08598	0.4643	0.40606	0.17661	-0.75572	-0.37324	-0.03582	-1.66767	-1.50881	-0.62353	0.38247	0.71989	-0.91195	-0.75309	0.13219	0.33742	-1.29443	-1.13556	-0.25029	-1.63185	-1.47298	-0.58771	0.15886	1.04414	0.88527
chr6	54039950	54039959	+	chr6	54039354	54040663	5UTR	Chn2	0.28434	0.09978	0.06064	0.07865	0.44145	0.24993	0.21318	0.96436	1.28939	1.1307	-0.50079	0.13747	0.30038	0.32504	0.16634	-1.46515	-0.82688	-0.66398	-0.15869	-1.79018	-1.15192	-0.98901	-1.63149	-0.99323	-0.83032	0.63826	0.80117	0.16291
chr7	81860261	81860270	+	chr7	81860086	81860504	exon	Tm6sf1	0.2549	0.1247	0.06185	0.08478	0.46034	0.20663	0.31399	0.67325	1.16138	0.96365	-0.66757	0.21466	-0.22557	0.48813	0.2904	-1.34082	-0.45859	-0.89882	-0.19773	-1.82895	-0.94672	-1.38695	-1.63122	-0.74899	-1.18922	0.88223	0.442	-0.44023
chr17	87153198	87153207	-	chr17	87152706	87153377	NA	NA	0.26978	0.13829	0.16704	0.13669	0.62104	0.27309	0.28465	0.64658	0.47841	0.65654	-0.97447	-0.01306	-0.05776	-0.16817	0.00996	-1.62105	-0.65964	-0.70434	0.17813	-1.45288	-0.49146	-0.53617	-1.63101	-0.6696	-0.7143	0.96141	0.91671	-0.0447
chr14	22183448	22183457	+	chr14	22183085	22183672	NA	NA	0.21596	0.1843	0.05681	0.09284	0.48501	0.31867	0.21232	0.15531	1.03812	0.72951	-0.90097	-0.41262	0.01703	0.88281	0.5742	-1.05627	-0.56793	-0.13828	-0.30861	-1.93909	-1.45074	-1.02109	-1.63048	-1.14213	-0.71248	0.48835	0.91799	0.42965
chr17	83990602	83990611	+	chr17	83990382	83991035	NA	NA	0.8186	0.46543	0.27301	0.28212	1.07095	1.13101	0.78081	0.70578	1.31358	1.27823	-0.35213	-0.42464	0.061	0.6078	0.57245	-1.0579	-1.13041	-0.64478	-0.03535	-1.6657	-1.73821	-1.25258	-1.63035	-1.70286	-1.21723	-0.07251	0.41312	0.48563
chr1	156921722	156921731	+	chr1	156921619	156921890	NA	NA	0.15854	0.16273	0.05977	0.06857	0.4093	0.15318	0.21706	-0.02372	0.71482	0.63466	-0.9942	0.03092	-0.30041	0.73854	0.65838	-0.97048	0.05464	-0.2767	-0.08016	-1.70902	-0.6839	-1.01523	-1.62886	-0.60374	-0.93507	1.02511	0.69378	-0.33133
chr6	65144770	65144779	-	chr6	65144549	65145231	5UTR	Hpgds	0.16632	0.05199	0.03817	0.03921	0.31843	0.22949	0.11456	0.83333	0.97655	0.96526	-0.66335	-0.31316	0.31948	0.14322	0.13193	-1.49669	-1.1465	-0.51385	-0.01129	-1.6399	-1.28971	-0.65707	-1.62862	-1.27843	-0.64578	0.35019	0.98283	0.63264
chr5	142794818	142794827	+	chr5	142794076	142795005	5UTR	Tnrc18	1.08147	0.80916	0.56708	0.48588	1.69895	1.4133	0.83184	0.38009	0.8301	1.0191	-0.60899	-0.35866	0.34432	0.45001	0.639	-0.98908	-0.73875	-0.03577	0.18899	-1.43909	-1.18876	-0.48578	-1.62809	-1.37776	-0.67478	0.25033	0.95331	0.70298
chr11	61142470	61142479	+	chr11	61142302	61142600	exon	Tnfrsf13b	0.09119	0.1558	0.05464	0.06123	0.38624	0.1999	0.17782	-0.43126	0.31671	0.25422	-1.37355	-0.6656	-0.55303	0.74797	0.68549	-0.94229	-0.23434	-0.12176	-0.06248	-1.69026	-0.98231	-0.86973	-1.62778	-0.91982	-0.80725	0.70795	0.82053	0.11257
chr1	98130241	98130250	-	chr1	98129940	98130324	NA	NA	0.04545	0.05723	0.00011	0.02172	0.26412	0.09471	0.1069	-0.1168	0.56608	0.26858	-1.35912	-0.43575	-0.52594	0.68288	0.38538	-1.24232	-0.31895	-0.40914	-0.2975	-1.9252	-1.00183	-1.09202	-1.6277	-0.70433	-0.79452	0.92337	0.83318	-0.09019
chr18	80255309	80255318	+	chr18	80255086	80255367	5UTR	Slc66a2	0.14285	0.27351	0.18396	0.13772	0.62252	0.29627	0.20817	-0.63327	-0.23068	0.03156	-1.59601	-0.7199	-0.35106	0.40259	0.66483	-0.96275	-0.08663	0.28221	0.26224	-1.36534	-0.48922	-0.12038	-1.62757	-0.75146	-0.38262	0.87611	1.24496	0.36884
chr8	117577246	117577255	+	chr8	117576990	117577524	CDS	Plcg2	0.14813	0.09067	0.03549	0.05496	0.36643	0.19346	0.10402	0.39037	0.90165	0.69993	-0.92649	-0.24734	0.2898	0.51128	0.30956	-1.31686	-0.63771	-0.10057	-0.20172	-1.82814	-1.14899	-0.61184	-1.62642	-0.94727	-0.41012	0.67915	1.2163	0.53715
chr13	100859363	100859372	-	chr13	100859140	100859467	exon	Gm41040	0.18062	0.14898	0.10061	0.05345	0.36176	0.28083	0.20713	0.17643	0.49631	0.89608	-0.73032	-0.44845	-0.13283	0.31988	0.71965	-0.90674	-0.62488	-0.30926	0.39977	-1.22663	-0.94476	-0.62915	-1.6264	-1.34453	-1.02891	0.28187	0.59748	0.31561
chr13	19854257	19854266	-	chr13	19854141	19855295	NA	NA	0.18773	0.07915	0.07411	0.05205	0.35736	0.20889	0.10033	0.70149	0.74404	0.94666	-0.67948	-0.10439	0.53523	0.04255	0.24517	-1.38097	-0.80588	-0.16626	0.20262	-1.42353	-0.84843	-0.20881	-1.62615	-1.05105	-0.41143	0.57509	1.21471	0.63962
chr9	121839448	121839457	-	chr9	121838879	121839616	5UTR	Ccdc13	0.57937	0.41459	0.283	0.20555	0.83088	0.40184	0.37674	0.40472	0.83641	1.16793	-0.45772	0.44133	0.51624	0.43169	0.76321	-0.86244	0.03661	0.11152	0.33152	-1.29414	-0.39508	-0.32018	-1.62566	-0.7266	-0.6517	0.89905	0.97396	0.07491
chr12	105937296	105937305	-	chr12	105936930	105937481	NA	NA	0.1131	0.11361	0.07856	0.07847	0.43814	0.17813	0.18368	-0.00354	0.26288	0.26363	-1.36042	-0.39355	-0.42265	0.26643	0.26718	-1.35687	-0.39001	-0.41911	0.00075	-1.6233	-0.65643	-0.68553	-1.62405	-0.65719	-0.68629	0.96686	0.93776	-0.0291
chrX	35888588	35888597	-	chrX	35888261	35889724	exon	Dock11	0.25474	0.27096	0.19744	0.22681	0.89525	0.33655	0.26971	-0.06554	0.25875	0.12034	-1.50351	-0.30383	-0.06059	0.32429	0.18588	-1.43797	-0.23829	0.00495	-0.13841	-1.76226	-0.56258	-0.31934	-1.62386	-0.42418	-0.18094	1.19968	1.44292	0.24324
chr2	117914085	117914094	+	chr2	117913907	117914217	transcript	4930412B13Rik	0.10258	0.09023	0.07454	0.06701	0.40261	0.24765	0.26091	0.09349	0.22172	0.28756	-1.33589	-0.79662	-0.85152	0.12823	0.19408	-1.42937	-0.89011	-0.945	0.06584	-1.55761	-1.01834	-1.07324	-1.62345	-1.08419	-1.13908	0.53926	0.48437	-0.05489
chr8	94418206	94418215	+	chr8	94417669	94418383	NA	NA	0.26032	0.20772	0.13816	0.17549	0.73683	0.39963	0.26159	0.23167	0.6094	0.3945	-1.22892	-0.47809	-0.00516	0.37773	0.16284	-1.46058	-0.70976	-0.23682	-0.2149	-1.83832	-1.08749	-0.61456	-1.62342	-0.87259	-0.39966	0.75083	1.22376	0.47293
chr12	108766054	108766063	+	chr12	108765635	108766383	transcript	Gm33682	0.59377	0.29618	0.35135	0.1917	0.78584	0.44486	0.45741	0.81739	0.6267	1.26669	-0.3552	0.35187	0.31867	-0.19069	0.4493	-1.17259	-0.46552	-0.49872	0.63999	-0.9819	-0.27483	-0.30803	-1.62189	-0.91482	-0.94802	0.70707	0.67387	-0.0332
chr8	127814945	127814954	-	chr8	127814804	127815169	NA	NA	0.09906	0.02442	0.01807	0.06311	0.38981	0.20107	0.20449	0.70396	0.7833	0.29685	-1.32427	-0.61136	-0.62797	0.07934	-0.40711	-2.02823	-1.31532	-1.33194	-0.48645	-2.10757	-1.39466	-1.41128	-1.62112	-0.90821	-0.92482	0.71291	0.6963	-0.01661
chr14	78679200	78679209	-	chr14	78678952	78679371	NA	NA	0.05557	0.02275	0.0202	0.04593	0.33691	0.14383	0.16911	0.35672	0.38851	0.09595	-1.52499	-0.66822	-0.81381	0.03179	-0.26077	-1.88171	-1.02494	-1.17053	-0.29256	-1.91351	-1.05673	-1.20232	-1.62094	-0.76417	-0.90976	0.85678	0.71119	-0.14559
chr6	97439147	97439156	-	chr6	97438958	97439613	NA	NA	0.13246	0.12274	0.03368	0.02471	0.27148	0.16342	0.19925	0.06322	0.82549	0.93037	-0.68993	-0.18468	-0.37251	0.76227	0.86715	-0.75315	-0.2479	-0.43573	0.10488	-1.51542	-1.01017	-1.19801	-1.6203	-1.11505	-1.30288	0.50525	0.31742	-0.18784
chr13	20090544	20090553	+	chr13	20090100	20091594	5UTR	Elmo1	0.61003	0.49403	0.35426	0.26426	1.00766	0.71704	0.58279	0.25965	0.65101	0.97414	-0.64579	-0.20407	0.05691	0.39136	0.71449	-0.90543	-0.46371	-0.20274	0.32313	-1.29679	-0.85508	-0.5941	-1.61992	-1.1782	-0.91723	0.44172	0.70269	0.26098
chr9	118716464	118716473	-	chr9	118716281	118716545	5UTR	Itga9	0.09179	0.081	0.05576	0.01826	0.25121	0.10529	0.10542	0.0862	0.31055	0.72556	-0.89291	-0.10107	-0.102	0.22436	0.63936	-0.9791	-0.18726	-0.1882	0.41501	-1.20346	-0.41162	-0.41256	-1.61847	-0.82662	-0.82756	0.79184	0.7909	-0.00094
chr7	80369298	80369307	-	chr7	80368758	80369437	5UTR	Man2a2	0.16604	0.22809	0.19923	0.1139	0.54484	0.25283	0.26624	-0.30846	-0.17314	0.3225	-1.2959	-0.41515	-0.46984	0.13532	0.63096	-0.98744	-0.10669	-0.16138	0.49564	-1.12276	-0.24201	-0.2967	-1.6184	-0.73764	-0.79234	0.88075	0.82606	-0.05469
chr9	55395821	55395830	+	chr9	55395718	55396049	5UTR	Tmem266	0.08554	0.07841	0.03397	0.06825	0.40453	0.18764	0.11879	0.05838	0.48769	0.14587	-1.47209	-0.64882	-0.24481	0.42931	0.08749	-1.53047	-0.7072	-0.30319	-0.34182	-1.95978	-1.13651	-0.7325	-1.61796	-0.79469	-0.39068	0.82327	1.22728	0.40401
chr9	110709946	110709955	+	chr9	110708775	110710140	CDS	Ccdc12	1.20483	1.46999	0.69055	0.78212	2.59443	2.0014	1.63667	-0.26797	0.72709	0.56788	-1.04941	-0.68991	-0.41405	0.99506	0.83585	-0.78144	-0.42194	-0.14608	-0.15922	-1.7765	-1.417	-1.14114	-1.61729	-1.25779	-0.98193	0.3595	0.63536	0.27586
chr1	181232458	181232467	+	chr1	181232241	181233014	CDS	Gm38664	0.21085	0.20385	0.30607	0.15017	0.65558	0.40022	0.30734	0.03349	-0.39187	0.31992	-1.29728	-0.6966	-0.39644	-0.42536	0.28643	-1.33077	-0.73009	-0.42993	0.71179	-0.90541	-0.30473	-0.00457	-1.6172	-1.01652	-0.71636	0.60068	0.90084	0.30016
chr3	59120124	59120133	-	chr3	59119900	59120361	transcript	P2ry14	0.12166	0.15205	0.11434	0.12756	0.58612	0.23913	0.24978	-0.18999	0.04976	-0.03889	-1.65589	-0.62674	-0.6721	0.23975	0.15109	-1.4659	-0.43675	-0.48212	-0.08865	-1.70565	-0.6765	-0.72186	-1.617	-0.58784	-0.63321	1.02915	0.98379	-0.04537
chr17	88284624	88284633	+	chr17	88284504	88284866	NA	NA	0.0506	0.10217	0.0194	0.02125	0.25999	0.06739	0.14287	-0.43938	0.34996	0.32667	-1.29017	-0.15822	-0.71106	0.78934	0.76605	-0.85079	0.28116	-0.27168	-0.0233	-1.64013	-0.50819	-1.06102	-1.61683	-0.48489	-1.03772	1.13194	0.57911	-0.55283
chr3	9759328	9759337	+	chr3	9759173	9759513	transcript	Pag1	0.11215	0.05609	0.06557	0.06929	0.4073	0.17107	0.1101	0.45721	0.369	0.3358	-1.28095	-0.36229	0.0144	-0.08822	-0.12141	-1.73816	-0.8195	-0.44281	-0.0332	-1.64995	-0.73129	-0.35459	-1.61675	-0.69809	-0.3214	0.91866	1.29535	0.37669
chr12	25316174	25316183	-	chr12	25316003	25316307	transcript	Gm46343	0.03609	0.06453	0.06834	0.02783	0.28013	0.09809	0.10889	-0.28475	-0.31896	0.09445	-1.52222	-0.56138	-0.64019	-0.03421	0.3792	-1.23747	-0.27663	-0.35545	0.41341	-1.20326	-0.24242	-0.32124	-1.61668	-0.65583	-0.73465	0.96084	0.88203	-0.07882
chr1	175660164	175660173	-	chr1	175659781	175660282	stop_codon	Kmo	0.03459	0.06657	0.01993	0.02854	0.28229	0.08559	0.10522	-0.31987	0.17427	0.06939	-1.54722	-0.48113	-0.63059	0.49414	0.38925	-1.22736	-0.16127	-0.31072	-0.10488	-1.72149	-0.6554	-0.80486	-1.61661	-0.55052	-0.69998	1.06609	0.91663	-0.14946
chr6	120473654	120473663	+	chr6	120473450	120474150	CDS	Il17ra	0.2149	0.15222	0.11153	0.17251	0.72371	0.19583	0.18561	0.32689	0.5872	0.21276	-1.40372	0.09186	0.1436	0.26031	-0.11413	-1.73062	-0.23504	-0.18329	-0.37444	-1.99093	-0.49535	-0.4436	-1.61649	-0.12091	-0.06916	1.49558	1.54732	0.05175
chr5	105648923	105648932	+	chr5	105648648	105649235	NA	NA	0.24901	0.18751	0.10785	0.12159	0.56747	0.22461	0.21745	0.28483	0.76423	0.66934	-0.94692	0.10638	0.13914	0.4794	0.3845	-1.23175	-0.17846	-0.14569	-0.09489	-1.71115	-0.65785	-0.62509	-1.61626	-0.56296	-0.5302	1.0533	1.08606	0.03276
chr15	101252852	101252861	+	chr15	101252655	101252972	NA	NA	0.11557	0.06498	0.04751	0.04768	0.34069	0.1756	0.19632	0.39804	0.5657	0.56397	-1.05166	-0.36301	-0.46973	0.16766	0.16593	-1.4497	-0.76105	-0.86777	-0.00173	-1.61737	-0.92871	-1.03544	-1.61564	-0.92698	-1.03371	0.68866	0.58193	-0.10673
chr4	137994766	137994775	+	chr4	137994627	137994864	exon	Eif4g3	0.27952	0.19434	0.18967	0.14273	0.63196	0.29577	0.2708	0.37313	0.39667	0.65739	-0.95824	-0.0614	0.03406	0.02354	0.28426	-1.33137	-0.43453	-0.33907	0.26072	-1.3549	-0.45806	-0.36261	-1.61562	-0.71878	-0.62333	0.89684	0.99229	0.09545
chr2	14249961	14249970	+	chr2	14249859	14250501	CDS	Mrc1	0.09857	0.03601	0.02368	0.04492	0.33222	0.11349	0.19109	0.56586	0.70932	0.47041	-1.14519	-0.10752	-0.56543	0.14346	-0.09545	-1.71105	-0.67338	-1.13129	-0.23892	-1.85451	-0.81685	-1.27475	-1.6156	-0.57793	-1.03583	1.03767	0.57976	-0.4579
chr14	70883056	70883065	+	chr14	70882896	70883152	transcript	2410012E07Rik	0.09072	0.05303	0.00595	0.0421	0.32357	0.06431	0.09672	0.32873	0.88441	0.43998	-1.17559	0.22226	-0.04605	0.55568	0.11125	-1.50432	-0.10647	-0.37478	-0.44443	-2.06	-0.66215	-0.93046	-1.61557	-0.21771	-0.48603	1.39785	1.12954	-0.26832
chr11	34031524	34031533	+	chr11	34031130	34032030	transcript	4930469K13Rik	0.3695	0.20064	0.17703	0.19224	0.78334	0.53391	0.37762	0.65317	0.77356	0.69486	-0.9202	-0.43778	-0.02504	0.12039	0.04169	-1.57337	-1.09096	-0.67821	-0.0787	-1.69376	-1.21135	-0.79861	-1.61506	-1.13265	-0.7199	0.48242	0.89516	0.41274
chr3	78919637	78919646	-	chr3	78919381	78919820	transcript	Gm38542	0.34059	0.26243	0.13859	0.20002	0.80641	0.43081	0.45931	0.28585	0.90115	0.56334	-1.0505	-0.272	-0.34826	0.61529	0.27749	-1.33635	-0.55785	-0.63411	-0.3378	-1.95164	-1.17314	-1.2494	-1.61384	-0.83534	-0.9116	0.7785	0.70224	-0.07626
chr5	124075013	124075022	-	chr5	124074850	124075383	CDS	Abcb9	0.23969	0.2388	0.21772	0.12482	0.57538	0.24576	0.38206	0.00385	0.09818	0.6082	-1.00378	-0.02599	-0.51231	0.09433	0.60435	-1.00763	-0.02984	-0.51616	0.51002	-1.10196	-0.12417	-0.61049	-1.61197	-0.63419	-1.12051	0.97779	0.49146	-0.48632
chr12	71040549	71040558	+	chr12	71040447	71040896	CDS	Arid4a	0.17728	0.07866	0.06753	0.04205	0.32236	0.19289	0.21449	0.65109	0.74708	0.99433	-0.61759	-0.08064	-0.18528	0.09599	0.34324	-1.26868	-0.73173	-0.83637	0.24725	-1.36466	-0.82772	-0.93236	-1.61191	-1.07497	-1.17961	0.53694	0.43231	-0.10464
chr18	66223179	66223188	+	chr18	66222968	66223333	NA	NA	0.18563	0.20168	0.12137	0.09006	0.46903	0.2853	0.26984	-0.08045	0.37632	0.60267	-1.00904	-0.43948	-0.37949	0.45676	0.68312	-0.9286	-0.35903	-0.29904	0.22636	-1.38536	-0.8158	-0.7558	-1.61172	-1.04216	-0.98216	0.56956	0.62956	0.05999
chr5	139830835	139830844	+	chr5	139830724	139830958	NA	NA	0.60821	0.33678	0.23386	0.2349	0.91163	0.5084	0.63167	0.70463	1.09824	1.09367	-0.51797	0.2211	-0.04739	0.39361	0.38904	-1.2226	-0.48353	-0.75202	-0.00457	-1.61621	-0.87714	-1.14563	-1.61164	-0.87258	-1.14107	0.73907	0.47058	-0.26849
chr4	132747825	132747834	-	chr4	132747444	132747997	CDS	Smpdl3b	0.3091	0.25385	0.19025	0.18634	0.76302	0.34166	0.36329	0.21253	0.5036	0.52357	-1.08772	-0.112	-0.18187	0.29107	0.31104	-1.30025	-0.32453	-0.3944	0.01997	-1.59132	-0.6156	-0.68547	-1.61129	-0.63557	-0.70543	0.97572	0.90585	-0.06987
chr2	165285867	165285876	-	chr2	165285668	165285891	5UTR	Slc35c2	0.24134	0.29303	0.11218	0.13101	0.59367	0.25085	0.184	-0.20668	0.70105	0.57511	-1.03554	-0.04031	0.27032	0.90772	0.78179	-0.82886	0.16636	0.477	-0.12594	-1.73659	-0.74136	-0.43073	-1.61065	-0.61542	-0.30479	0.99523	1.30586	0.31063
chr11	103984224	103984233	+	chr11	103984092	103984565	exon	Arf2	0.07924	0.05823	0.03356	0.04893	0.34281	0.17103	0.18115	0.18623	0.44085	0.27702	-1.33298	-0.61266	-0.66668	0.25462	0.09079	-1.51921	-0.7989	-0.85291	-0.16383	-1.77383	-1.05352	-1.10753	-1.61	-0.88969	-0.9437	0.72032	0.6663	-0.05401
chr15	79753162	79753171	+	chr15	79752893	79753404	exon	Gm16576	0.68217	0.6065	0.37864	0.38131	1.35739	0.64737	0.58261	0.14794	0.71533	0.70721	-0.90277	0.06616	0.19798	0.5674	0.55927	-1.05071	-0.08178	0.05004	-0.00812	-1.61811	-0.64918	-0.51735	-1.60998	-0.64105	-0.50923	0.96893	1.10075	0.13182
chr1	133159498	133159507	-	chr1	133159321	133159646	NA	NA	0.18203	0.0982	0.07703	0.08425	0.4506	0.35651	0.14575	0.52165	0.68977	0.63021	-0.97973	-0.70623	0.2031	0.16813	0.10856	-1.50138	-1.22788	-0.31855	-0.05957	-1.6695	-1.396	-0.48668	-1.60994	-1.33644	-0.42711	0.2735	1.18282	0.90933
chr3	115682523	115682532	+	chr3	115682324	115683162	NA	NA	0.23204	0.19071	0.107	0.07318	0.41678	0.24106	0.22571	0.1954	0.69717	0.9626	-0.64725	-0.03934	0.02826	0.50177	0.7672	-0.84265	-0.23474	-0.16713	0.26543	-1.34442	-0.73651	-0.6689	-1.60985	-1.00194	-0.93433	0.60791	0.67552	0.0676
chr1	86398540	86398549	-	chr1	86398323	86398890	NA	NA	0.11591	0.14216	0.08379	0.08	0.43756	0.15172	0.1944	-0.1698	0.23929	0.27033	-1.33942	-0.22699	-0.45783	0.40909	0.44013	-1.16962	-0.05719	-0.28803	0.03104	-1.57871	-0.46628	-0.69712	-1.60975	-0.49732	-0.72816	1.11243	0.88159	-0.23084
chr11	104361949	104361958	-	chr11	104361557	104362150	CDS	Kansl1	0.22798	0.28238	0.19421	0.10988	0.52844	0.44185	0.2188	-0.22506	0.15972	0.6586	-0.95042	-0.73441	0.0417	0.38478	0.88366	-0.72537	-0.50935	0.26675	0.49888	-1.11014	-0.89413	-0.11802	-1.60903	-1.39301	-0.6169	0.21601	0.99212	0.77611
chr10	20835423	20835432	+	chr10	20834516	20835602	exon	Gm33510	0.12833	0.13719	0.08834	0.10464	0.51242	0.27834	0.20922	-0.05631	0.28572	0.16235	-1.44659	-0.74326	-0.44723	0.34203	0.21867	-1.39027	-0.68695	-0.39092	-0.12336	-1.7323	-1.02898	-0.73295	-1.60894	-0.90562	-0.60958	0.70332	0.99936	0.29604
chr10	94333493	94333502	-	chr10	94333358	94333674	NA	NA	0.10411	0.07157	0.059	0.04528	0.33131	0.17246	0.15402	0.2585	0.37223	0.50755	-1.10124	-0.42715	-0.32379	0.11373	0.24904	-1.35974	-0.68565	-0.58229	0.13531	-1.47348	-0.79938	-0.69602	-1.60879	-0.9347	-0.83133	0.67409	0.77745	0.10336
chr4	47746602	47746611	+	chr4	47746133	47747090	NA	NA	0.07238	0.02554	0.02087	0.02136	0.25825	0.10872	0.09451	0.47614	0.53351	0.52738	-1.08098	-0.28462	-0.1799	0.05737	0.05124	-1.55712	-0.76076	-0.65605	-0.00613	-1.61448	-0.81813	-0.71341	-1.60836	-0.812	-0.70729	0.79636	0.90107	0.10471
chr8	11452790	11452799	+	chr8	11452502	11453309	3UTR	Rab20	0.11276	0.13007	0.07862	0.04616	0.33383	0.21004	0.17967	-0.11586	0.26001	0.56005	-1.04818	-0.55575	-0.40405	0.37587	0.67591	-0.93232	-0.43989	-0.2882	0.30004	-1.30819	-0.81576	-0.66407	-1.60823	-1.1158	-0.96411	0.49243	0.64413	0.15169
chr5	147657935	147657944	+	chr5	147657676	147658682	transcript	Flt1	0.58645	0.41809	0.24267	0.1832	0.7509	0.5849	0.40556	0.40992	1.01461	1.29479	-0.31219	0.00329	0.44564	0.6047	0.88487	-0.72211	-0.40663	0.03572	0.28018	-1.3268	-1.01132	-0.56897	-1.60698	-1.2915	-0.84915	0.31548	0.75783	0.44235
chr1	92972288	92972297	+	chr1	92972048	92972568	5UTR	Gpr35	0.08	0.04612	0.05947	0.04028	0.31539	0.17331	0.16235	0.31192	0.18085	0.37323	-1.2332	-0.6187	-0.55836	-0.13107	0.06131	-1.54512	-0.93063	-0.87029	0.19238	-1.41405	-0.79956	-0.73922	-1.60643	-0.99193	-0.93159	0.61449	0.67484	0.06034
chr4	140945364	140945373	-	chr4	140944784	140945547	CDS	Padi2	0.38114	0.18727	0.20336	0.13399	0.60041	0.25555	0.26378	0.75587	0.67569	1.05856	-0.5472	0.44258	0.40903	-0.08019	0.30269	-1.30307	-0.31329	-0.34684	0.38287	-1.22288	-0.23311	-0.26666	-1.60576	-0.61598	-0.64953	0.98978	0.95623	-0.03355
chr14	31685924	31685933	-	chr14	31685305	31686034	NA	NA	0.20724	0.18981	0.10513	0.09896	0.49375	0.32484	0.32893	0.08591	0.59659	0.64194	-0.96371	-0.47515	-0.48916	0.51067	0.55603	-1.04962	-0.56106	-0.57508	0.04535	-1.5603	-1.07174	-1.08575	-1.60565	-1.11709	-1.1311	0.48856	0.47454	-0.01401
chr3	40500592	40500601	+	chr3	40500315	40500792	exon	1700017G19Rik	0.08201	0.02521	0.07924	0.04397	0.32636	0.10585	0.13012	0.56118	0.02285	0.35074	-1.25478	-0.18302	-0.34817	-0.53832	-0.21044	-1.81596	-0.74419	-0.90935	0.32789	-1.27763	-0.20587	-0.37103	-1.60552	-0.53375	-0.69891	1.07176	0.9066	-0.16516
chr15	79650807	79650816	+	chr15	79650390	79650895	5UTR	Fam227a	0.20611	0.28846	0.24301	0.2767	1.03455	0.60401	0.40188	-0.34956	-0.16717	-0.30453	-1.91003	-1.21707	-0.72403	0.18239	0.04503	-1.56047	-0.86751	-0.37447	-0.13736	-1.74286	-1.0499	-0.55686	-1.60549	-0.91254	-0.41949	0.69295	1.186	0.49305
chr1	55029032	55029041	+	chr1	55028892	55029179	NA	NA	0.85266	0.7441	0.56359	0.51252	1.75204	1.26687	1.08427	0.17567	0.52549	0.64208	-0.96333	-0.5235	-0.31568	0.34982	0.4664	-1.139	-0.69917	-0.49135	0.11659	-1.48882	-1.04899	-0.84117	-1.60541	-1.16557	-0.95775	0.43983	0.64765	0.20782
chr9	121249932	121249941	+	chr9	121249757	121250098	5UTR	Ulk4	0.07885	0.14318	0.07508	0.04716	0.33601	0.1505	0.12903	-0.4559	0.03177	0.29172	-1.3136	-0.4997	-0.36725	0.48766	0.74762	-0.85771	-0.04381	0.08865	0.25995	-1.34537	-0.53147	-0.39902	-1.60532	-0.79142	-0.65897	0.8139	0.94635	0.13245
chr14	30362470	30362479	-	chr14	30362371	30362664	NA	NA	0.04599	0.02337	0	0	0.19234	0.08392	0.05771	0.25376	0.57333	0.57333	-1.03109	-0.34536	-0.11579	0.31957	0.31957	-1.28485	-0.59912	-0.36956	0	-1.60442	-0.91869	-0.68913	-1.60442	-0.91869	-0.68913	0.68573	0.9153	0.22956
chr16	44702471	44702480	-	chr16	44701567	44702721	NA	NA	0.2349	0.18292	0.11018	0.07861	0.43132	0.23254	0.16456	0.24797	0.68714	0.92914	-0.67514	0.01038	0.34685	0.43916	0.68117	-0.92311	-0.23759	0.09888	0.242	-1.36228	-0.67676	-0.34029	-1.60428	-0.91876	-0.58229	0.68552	1.02199	0.33647
chr17	70974274	70974283	+	chr17	70974129	70974482	stop_codon	Myl12b	0.1939	0.10626	0.10378	0.10837	0.52173	0.21667	0.20961	0.52315	0.5411	0.50804	-1.09606	-0.10972	-0.07659	0.01796	-0.0151	-1.61921	-0.63287	-0.59973	-0.03306	-1.63716	-0.65082	-0.61769	-1.60411	-0.61777	-0.58463	0.98634	1.01948	0.03314
chr1	155091428	155091437	-	chr1	155091316	155091833	3UTR	Ier5	0.08762	0.02969	0.03545	0.03384	0.29514	0.10307	0.15412	0.55327	0.48773	0.50575	-1.09831	-0.11763	-0.44958	-0.06554	-0.04752	-1.65157	-0.6709	-1.00285	0.01802	-1.58604	-0.60536	-0.93731	-1.60406	-0.62338	-0.95533	0.98068	0.64872	-0.33195
chr7	25132523	25132532	+	chr7	25132365	25132856	transcript	Pou2f2	0.58574	0.41257	0.21951	0.26056	0.98386	0.82315	0.66205	0.42404	1.11585	0.93847	-0.66492	-0.43204	-0.15345	0.69181	0.51443	-1.08896	-0.85608	-0.57749	-0.17739	-1.78077	-1.54789	-1.2693	-1.60339	-1.3705	-1.09191	0.23288	0.51147	0.27859
chr11	121486183	121486192	+	chr11	121485559	121486296	5UTR	Tbcd	0.12243	0.04293	0.0708	0.06854	0.4003	0.15562	0.2148	0.6595	0.39266	0.41255	-1.19055	-0.20561	-0.51227	-0.26683	-0.24694	-1.85005	-0.86511	-1.17177	0.01989	-1.58321	-0.59827	-0.90494	-1.6031	-0.61817	-0.92483	0.98494	0.67828	-0.30666
chr11	79278845	79278854	-	chr11	79278392	79279133	NA	NA	0.26043	0.3443	0.18186	0.1139	0.53781	0.32323	0.34603	-0.30622	0.36127	0.76889	-0.83354	-0.23519	-0.3119	0.6675	1.07512	-0.52732	0.07103	-0.00568	0.40762	-1.19482	-0.59646	-0.67318	-1.60244	-1.00408	-1.0808	0.59835	0.52164	-0.07671
chr17	29245830	29245839	+	chr17	29245716	29246025	transcript	Gm41557	0.11308	0.07217	0.07861	0.06836	0.39944	0.18599	0.16406	0.3171	0.26232	0.35051	-1.25168	-0.43473	-0.31717	-0.05478	0.03341	-1.56878	-0.75183	-0.63427	0.08819	-1.514	-0.69706	-0.5795	-1.60219	-0.78525	-0.66769	0.81694	0.9345	0.11756
chr2	9965839	9965848	-	chr2	9965503	9966152	NA	NA	0.1339	0.1129	0.04379	0.02371	0.26388	0.2085	0.122	0.13931	0.7249	0.95168	-0.6505	-0.40814	0.07728	0.58559	0.81238	-0.78981	-0.54745	-0.06202	0.22679	-1.3754	-1.13304	-0.64761	-1.60219	-1.35983	-0.8744	0.24236	0.72778	0.48543
chr6	136714315	136714324	+	chr6	136714072	136714465	CDS	Gucy2c	0.03859	0.04422	0.01829	0.05713	0.36508	0.12431	0.11979	-0.05988	0.23925	-0.18848	-1.78984	-0.71834	-0.68819	0.29914	-0.1286	-1.72996	-0.65846	-0.62831	-0.42774	-2.02909	-0.95759	-0.92744	-1.60136	-0.52985	-0.49971	1.0715	1.10165	0.03015
chr5	124074986	124074995	+	chr5	124074850	124075383	CDS	Abcb9	0.23724	0.26288	0.21772	0.12482	0.57046	0.24576	0.34208	-0.10748	0.08756	0.59757	-1.00376	-0.03661	-0.39645	0.19504	0.70506	-0.89628	0.07087	-0.28897	0.51002	-1.09132	-0.12417	-0.48401	-1.60133	-0.63419	-0.99403	0.96715	0.60731	-0.35984
chr3	96564929	96564938	-	chr3	96564246	96564971	exon	Gm15441	0.20583	0.13464	0.16758	0.15057	0.64811	0.33611	0.23091	0.39069	0.19672	0.29363	-1.30677	-0.5202	-0.1158	-0.19398	-0.09707	-1.69746	-0.91089	-0.5065	0.09691	-1.50349	-0.71691	-0.31252	-1.6004	-0.81382	-0.40943	0.78657	1.19097	0.40439
chr9	110038090	110038099	+	chr9	110037621	110038575	start_codon	Map4	0.12449	0.10123	0.05789	0.12802	0.57954	0.18919	0.16893	0.1622	0.52382	-0.0231	-1.62308	-0.37383	-0.26683	0.36162	-0.18529	-1.78528	-0.53602	-0.42903	-0.54691	-2.1469	-0.89764	-0.79065	-1.59999	-0.35073	-0.24374	1.24926	1.35625	0.10699
chr8	121877449	121877458	+	chr8	121877177	121877654	exon	Gm26812	0.1456	0.14274	0.12353	0.09962	0.49332	0.16188	0.19412	0.01731	0.13926	0.30704	-1.29263	-0.09474	-0.26579	0.12195	0.28974	-1.30993	-0.11205	-0.28309	0.16778	-1.43189	-0.234	-0.40505	-1.59967	-0.40179	-0.57283	1.19788	1.02684	-0.17104
chr12	100505580	100505589	-	chr12	100505430	100505830	NA	NA	0.48525	0.24516	0.14291	0.18486	0.75158	0.41611	0.43772	0.77178	1.28895	1.05397	-0.54556	0.18329	0.12346	0.51717	0.2822	-1.31734	-0.58849	-0.64832	-0.23497	-1.83451	-1.10565	-1.16548	-1.59953	-0.87068	-0.93051	0.72885	0.66902	-0.05983
chr10	59221839	59221848	+	chr10	59221190	59222431	5UTR	Sowahc	1.48197	1.26192	0.82753	0.82688	2.69455	1.71027	1.53509	0.21693	0.77397	0.77499	-0.82318	-0.19515	-0.04782	0.55704	0.55806	-1.04011	-0.41208	-0.26475	0.00102	-1.59715	-0.96912	-0.82179	-1.59817	-0.97014	-0.82281	0.62803	0.77536	0.14733
chr4	117124615	117124624	-	chr4	117124470	117125220	5UTR	Tctex1d4	0.22415	0.19096	0.31267	0.18316	0.74563	0.19918	0.30904	0.15882	-0.3539	0.19882	-1.39934	0.11782	-0.34098	-0.51272	0.04	-1.55816	-0.04099	-0.49979	0.55273	-1.04544	0.47173	0.01293	-1.59816	-0.081	-0.5398	1.51717	1.05837	-0.4588
chr10	121305610	121305619	-	chr10	121305447	121306080	CDS	Tbc1d30	0.26899	0.21018	0.08712	0.13698	0.60573	0.24593	0.21519	0.25481	1.00199	0.65159	-0.94639	0.09462	0.23126	0.74717	0.39678	-1.2012	-0.16019	-0.02355	-0.35039	-1.94838	-0.90736	-0.77072	-1.59799	-0.55697	-0.42033	1.04102	1.17765	0.13664
chr5	67404605	67404614	+	chr5	67404290	67404810	CDS	Bend4	0.0641	0.06623	0.06861	0.02715	0.27301	0.10569	0.11467	-0.01928	-0.04052	0.38335	-1.21368	-0.33645	-0.39983	-0.02124	0.40263	-1.19441	-0.31717	-0.38056	0.42386	-1.17317	-0.29593	-0.35932	-1.59703	-0.7198	-0.78318	0.87723	0.81385	-0.06338
chr19	60818749	60818758	+	chr19	60818639	60819082	CDS	Dennd10	0.07999	0.02309	0.05161	0.04521	0.32745	0.12037	0.15948	0.57038	0.25649	0.32122	-1.27514	-0.30071	-0.54222	-0.31389	-0.24916	-1.84552	-0.87109	-1.1126	0.06473	-1.53163	-0.5572	-0.79871	-1.59637	-0.62193	-0.86344	0.97443	0.73292	-0.24151
chr15	80639248	80639257	+	chr15	80639103	80639427	CDS	Grap2	0.11254	0.09275	0.06256	0.04156	0.31632	0.17524	0.08927	0.14513	0.39915	0.60658	-0.98946	-0.38207	0.17223	0.25402	0.46145	-1.13459	-0.52719	0.0271	0.20743	-1.38861	-0.78121	-0.22692	-1.59604	-0.98864	-0.43435	0.6074	1.16169	0.55429
chr6	89043075	89043084	+	chr6	89042866	89043200	NA	NA	0.10013	0.05129	0.03946	0.02083	0.25338	0.08806	0.05567	0.41746	0.53977	0.75624	-0.83867	0.09249	0.37469	0.12231	0.33878	-1.25614	-0.32498	-0.04278	0.21647	-1.37845	-0.44729	-0.16509	-1.59492	-0.66376	-0.38156	0.93116	1.21336	0.2822
chr4	121196406	121196415	+	chr4	121196239	121196890	NA	NA	0.12876	0.1568	0.06451	0.08215	0.43843	0.20941	0.1849	-0.17087	0.49026	0.33826	-1.25616	-0.44535	-0.32393	0.66113	0.50912	-1.08529	-0.27448	-0.15307	-0.152	-1.74642	-0.93561	-0.81419	-1.59442	-0.78361	-0.66219	0.81081	0.93223	0.12142
chr7	110710717	110710726	+	chr7	110710479	110710957	exon	Gm18907	0.0472	0.02537	0.0037	0.02947	0.27929	0.06467	0.11576	0.24183	0.53017	0.19321	-1.40097	-0.16801	-0.57017	0.28834	-0.04862	-1.6428	-0.40984	-0.812	-0.33696	-1.93115	-0.69818	-1.10034	-1.59418	-0.36122	-0.76338	1.23296	0.8308	-0.40216
chr2	167775518	167775527	+	chr2	167774866	167775837	exon	Gm32287	0.3122	0.33075	0.34931	0.22112	0.85785	0.52158	0.43966	-0.06438	-0.12605	0.36603	-1.22804	-0.59945	-0.39352	-0.06167	0.43042	-1.16365	-0.53507	-0.32913	0.49208	-1.10198	-0.4734	-0.26747	-1.59407	-0.96549	-0.75955	0.62858	0.83452	0.20594
chr8	72216036	72216045	+	chr8	72215943	72216194	NA	NA	0.12931	0.07921	0.04033	0.08914	0.45934	0.23352	0.1482	0.36606	0.7322	0.28575	-1.30816	-0.55202	-0.11703	0.36614	-0.08031	-1.67421	-0.91808	-0.48308	-0.44645	-2.04035	-1.28422	-0.84922	-1.5939	-0.83777	-0.40277	0.75613	1.19113	0.435
chr11	117792765	117792774	-	chr11	117792014	117792924	CDS	Tmc8	0.2373	0.2079	0.14611	0.19689	0.78435	0.34922	0.28786	0.13396	0.46403	0.18751	-1.40598	-0.41961	-0.20476	0.33007	0.05355	-1.53994	-0.55357	-0.33872	-0.27652	-1.87001	-0.88364	-0.66879	-1.59349	-0.60712	-0.39227	0.98637	1.20122	0.21485
chr5	120527686	120527695	+	chr5	120527370	120527910	CDS	Slc8b1	0.1402	0.19919	0.07448	0.06074	0.37338	0.16993	0.28482	-0.32379	0.47456	0.59711	-0.99609	-0.17224	-0.69318	0.79835	0.92089	-0.6723	0.15154	-0.3694	0.12254	-1.47065	-0.6468	-1.16775	-1.59319	-0.76935	-1.29029	0.82385	0.3029	-0.52094
chr3	107120047	107120056	-	chr3	107119951	107120492	transcript	Kcna2	0.05164	0.02521	0.03617	0.02461	0.26426	0.12954	0.06787	0.28835	0.16172	0.29562	-1.29713	-0.61726	-0.15218	-0.12664	0.00726	-1.58549	-0.90562	-0.44053	0.1339	-1.45885	-0.77898	-0.3139	-1.59275	-0.91288	-0.4478	0.67987	1.14495	0.46508
chr5	120831221	120831230	-	chr5	120831098	120831440	transcript	Oas1b	0.14364	0.07377	0.08973	0.08881	0.45776	0.25407	0.29116	0.50166	0.37075	0.37798	-1.2144	-0.55012	-0.6961	-0.13092	-0.12368	-1.71606	-1.05178	-1.19776	0.00723	-1.58515	-0.92086	-1.06685	-1.59238	-0.9281	-1.07408	0.66428	0.5183	-0.14598
chr2	28495296	28495305	-	chr2	28495082	28495667	transcript	Gbgt1	0.1524	0.13241	0.06364	0.08681	0.45167	0.19582	0.27382	0.12194	0.64355	0.446	-1.14622	-0.23394	-0.57751	0.52161	0.32406	-1.26816	-0.35587	-0.69945	-0.19755	-1.78977	-0.87748	-1.22106	-1.59222	-0.67993	-1.02351	0.91229	0.56871	-0.34358
chr2	34944974	34944983	-	chr2	34944713	34945113	CDS	Traf1	0.43573	0.18242	0.14682	0.23387	0.89499	0.54627	0.39163	0.93777	1.13649	0.69171	-0.90038	-0.27331	0.12534	0.19871	-0.24606	-1.83815	-1.21108	-0.81243	-0.44477	-2.03687	-1.40979	-1.01115	-1.5921	-0.96502	-0.56638	0.62708	1.02572	0.39864
chr3	109362019	109362028	+	chr3	109361902	109362685	NA	NA	0.15264	0.16512	0.09238	0.04778	0.33383	0.29144	0.1869	-0.07114	0.40369	0.79767	-0.79401	-0.64357	-0.18747	0.47483	0.86882	-0.72287	-0.57243	-0.11633	0.39399	-1.1977	-1.04726	-0.59116	-1.59168	-1.44125	-0.98514	0.15044	0.60654	0.4561
chr1	52578368	52578377	-	chr1	52577968	52578984	exon	Gm28178	0.347	0.24444	0.2114	0.16178	0.67735	0.43423	0.23107	0.38163	0.52972	0.78528	-0.80626	-0.26025	0.43974	0.14808	0.40365	-1.18789	-0.64188	0.05811	0.25557	-1.33597	-0.78997	-0.08998	-1.59154	-1.04554	-0.34555	0.546	1.24599	0.69999
chr12	12580869	12580878	-	chr12	12580445	12581172	NA	NA	0.17962	0.12947	0.10639	0.11044	0.52204	0.24044	0.20017	0.2918	0.44888	0.42005	-1.17012	-0.28933	-0.10438	0.15708	0.12825	-1.46192	-0.58113	-0.39618	-0.02883	-1.619	-0.73822	-0.55327	-1.59017	-0.70938	-0.52444	0.88078	1.06573	0.18495
chr17	57279088	57279097	+	chr17	57278802	57279290	5UTR	Vav1	0.77288	0.82417	0.56516	0.41276	1.43195	0.74726	0.86275	-0.08291	0.39507	0.77423	-0.81562	0.04327	-0.14227	0.47798	0.85714	-0.73272	0.12617	-0.05936	0.37916	-1.2107	-0.3518	-0.53734	-1.58986	-0.73097	-0.9165	0.85889	0.67335	-0.18554
chr2	57587225	57587234	+	chr2	57587116	57587448	NA	NA	0.09752	0.05619	0.01566	0.06153	0.37453	0.1062	0.17566	0.35019	0.80305	0.29987	-1.28953	-0.06387	-0.4931	0.45287	-0.05032	-1.63972	-0.41405	-0.84329	-0.50319	-2.09259	-0.86692	-1.29616	-1.5894	-0.36373	-0.79297	1.22567	0.79643	-0.42924
chr6	134065398	134065407	-	chr6	134064927	134065413	NA	NA	0.09572	0.11669	0.08145	0.06938	0.39789	0.1626	0.13468	-0.15106	0.11266	0.21533	-1.3733	-0.43515	-0.26913	0.26372	0.3664	-1.22224	-0.28409	-0.11807	0.10268	-1.48595	-0.54781	-0.38179	-1.58863	-0.65049	-0.48447	0.93814	1.10416	0.16602
chr5	125440791	125440800	-	chr5	125440633	125440864	5UTR	Bri3bp	0.19397	0.20883	0.13783	0.15087	0.64285	0.3544	0.24045	-0.07253	0.31255	0.23368	-1.35469	-0.63842	-0.2157	0.38508	0.30621	-1.28216	-0.56589	-0.14317	-0.07887	-1.66724	-0.95097	-0.52825	-1.58837	-0.8721	-0.44938	0.71627	1.13899	0.42272
chr5	121519986	121519995	+	chr5	121519705	121520245	CDS	Adam1a	0.17932	0.22428	0.11031	0.12925	0.5776	0.30667	0.29167	-0.21952	0.41939	0.29164	-1.29623	-0.5514	-0.49639	0.63891	0.51115	-1.07671	-0.33189	-0.27687	-0.12775	-1.71562	-0.97079	-0.91578	-1.58786	-0.84304	-0.78803	0.74482	0.79984	0.05501
chr5	148495398	148495407	+	chr5	148495140	148495700	3UTR	Ubl3	0.25303	0.12631	0.13217	0.11267	0.52754	0.29324	0.28262	0.65493	0.6171	0.74703	-0.84033	-0.15806	-0.11797	-0.03783	0.0921	-1.49526	-0.81299	-0.7729	0.12993	-1.45743	-0.77516	-0.73507	-1.58735	-0.90509	-0.86499	0.68227	0.72236	0.04009
chr15	72971991	72972000	+	chr15	72971105	72972195	5UTR	Gm31665	0.12744	0.14286	0.09628	0.09004	0.45945	0.19626	0.16319	-0.09701	0.21853	0.26657	-1.32056	-0.39004	-0.21569	0.31554	0.36358	-1.22355	-0.29303	-0.11868	0.04804	-1.53909	-0.60857	-0.43422	-1.58713	-0.65661	-0.48226	0.93052	1.10487	0.17435
chr10	67503865	67503874	+	chr10	67503399	67504295	transcript	Gm40679	0.17945	0.07998	0.05153	0.06085	0.3717	0.21001	0.21113	0.6516	0.9088	0.8194	-0.76758	-0.15271	-0.15801	0.2572	0.16779	-1.41918	-0.80431	-0.80961	-0.08941	-1.67638	-1.06151	-1.06681	-1.58698	-0.97211	-0.97741	0.61487	0.60957	-0.0053
chr10	75565631	75565640	+	chr10	75565033	75565815	5UTR	Ggt1	0.19925	0.16832	0.0361	0.09544	0.47537	0.33361	0.18191	0.16066	1.17097	0.62972	-0.95664	-0.54378	0.08786	1.01031	0.46906	-1.1173	-0.70444	-0.0728	-0.54125	-2.12761	-1.71475	-1.08311	-1.58636	-1.1735	-0.54186	0.41286	1.0445	0.63163
chr5	110639678	110639687	-	chr5	110639221	110639845	3UTR	Noc4l	0.43251	0.35666	0.39977	0.37392	1.31132	0.74496	0.5203	0.22431	0.09258	0.17011	-1.41594	-0.67189	-0.22238	-0.13173	-0.05419	-1.64024	-0.89619	-0.44669	0.07754	-1.50851	-0.76446	-0.31496	-1.58605	-0.842	-0.3925	0.74405	1.19355	0.4495
chr9	95120255	95120264	+	chr9	95120081	95120400	NA	NA	0.20784	0.21591	0.05238	0.06581	0.38606	0.17563	0.21254	-0.03803	1.0428	0.91637	-0.66899	0.16266	-0.02227	1.08083	0.9544	-0.63095	0.20069	0.01576	-0.12643	-1.71179	-0.88014	-1.06507	-1.58535	-0.75371	-0.93864	0.83165	0.64671	-0.18493
chr14	30908104	30908113	+	chr14	30907929	30908292	3UTR	Itih3	0.171	0.13757	0.06906	0.16532	0.68408	0.20955	0.21701	0.19435	0.69974	0.03123	-1.55303	-0.19577	-0.23077	0.50539	-0.16312	-1.74738	-0.39012	-0.42512	-0.66851	-2.25277	-0.89551	-0.93051	-1.58426	-0.227	-0.262	1.35726	1.32226	-0.035
chr6	140817004	140817013	+	chr6	140816886	140817474	exon	Gm30215	0.11437	0.13051	0.02858	0.05548	0.35469	0.20187	0.1517	-0.10751	0.76421	0.47851	-1.10565	-0.5053	-0.23749	0.87172	0.58602	-0.99814	-0.3978	-0.12998	-0.2857	-1.86986	-1.26952	-1.0017	-1.58416	-0.98382	-0.716	0.60034	0.86816	0.26782
chr9	90043039	90043048	-	chr9	90042897	90043231	exon	Gm17944	0.13294	0.05816	0	0.04733	0.33024	0.20823	0.1511	0.57594	1.26933	0.68228	-0.90183	-0.41294	-0.11094	0.69339	0.10634	-1.47777	-0.98888	-0.68688	-0.58705	-2.17117	-1.68228	-1.38028	-1.58411	-1.09522	-0.79322	0.48889	0.79089	0.302
chr12	101016169	101016178	+	chr12	101015922	101016365	transcript	Gm36756	0.46129	0.37961	0.30276	0.16678	0.68818	0.49994	0.46671	0.22943	0.48472	1.08968	-0.49407	-0.09703	-0.01401	0.25529	0.86025	-0.7235	-0.32646	-0.24344	0.60496	-0.97879	-0.58175	-0.49872	-1.58375	-1.18671	-1.10368	0.39704	0.48006	0.08303
chr6	87502968	87502977	-	chr6	87502415	87503394	NA	NA	0.17504	0.16132	0.11269	0.10485	0.50253	0.23583	0.35024	0.07544	0.37995	0.43567	-1.14804	-0.29366	-0.72299	0.30451	0.36023	-1.22348	-0.3691	-0.79843	0.05572	-1.52799	-0.6736	-1.10294	-1.58371	-0.72932	-1.15866	0.85438	0.42505	-0.42934
chr9	59567355	59567364	+	chr9	59567148	59567521	transcript	Hexa	0.51722	0.63611	0.26477	0.30331	1.09725	0.64171	0.61581	-0.25633	0.76822	0.62111	-0.96243	-0.26735	-0.21566	1.02454	0.87744	-0.7061	-0.01102	0.04067	-0.14711	-1.73064	-1.03556	-0.98388	-1.58353	-0.88845	-0.83677	0.69508	0.74677	0.05169
chr3	105825892	105825901	+	chr3	105825518	105826020	exon	Gm46838	0.0879	0.07019	0.06994	0.05632	0.35693	0.1149	0.14612	0.14757	0.14976	0.27469	-1.30858	-0.19941	-0.40013	0.0022	0.12713	-1.45614	-0.34698	-0.5477	0.12493	-1.45834	-0.34917	-0.54989	-1.58327	-0.4741	-0.67482	1.10917	0.90845	-0.20072
chr18	67392337	67392346	-	chr18	67392237	67392559	CDS	Tubb6	0.10841	0.16287	0.06987	0.07652	0.41736	0.16975	0.14754	-0.34338	0.30431	0.24701	-1.33598	-0.38148	-0.25469	0.64769	0.59039	-0.9926	-0.0381	0.08869	-0.0573	-1.64029	-0.68579	-0.559	-1.58299	-0.62848	-0.5017	0.95451	1.08129	0.12678
chr3	54590164	54590173	+	chr3	54590049	54590321	exon	Gm40050	0.11036	0.04861	0.05256	0.05748	0.36011	0.21051	0.16339	0.51827	0.47893	0.43137	-1.15096	-0.5748	-0.33248	-0.03935	-0.0869	-1.66923	-1.09307	-0.85075	-0.04756	-1.62989	-1.05372	-0.81141	-1.58233	-1.00617	-0.76385	0.57616	0.81848	0.24232
chr3	137848625	137848634	-	chr3	137848222	137848758	NA	NA	0.13737	0.0574	0.0435	0.0752	0.41309	0.15271	0.14663	0.61101	0.74971	0.4509	-1.13119	-0.09252	-0.05655	0.13869	-0.16011	-1.74221	-0.70353	-0.66757	-0.29881	-1.8809	-0.84223	-0.80626	-1.58209	-0.54342	-0.50745	1.03868	1.07464	0.03596
chr14	25646282	25646291	+	chr14	25645811	25646693	CDS	Zmiz1	0.18319	0.24797	0.19386	0.16691	0.68757	0.18432	0.19082	-0.30275	-0.05444	0.08724	-1.49466	-0.00586	-0.03914	0.2483	0.38999	-1.19191	0.29688	0.26361	0.14169	-1.44022	0.04858	0.0153	-1.5819	-0.09311	-0.12638	1.4888	1.45552	-0.03328
chr1	85838206	85838215	-	chr1	85838066	85838391	CDS	Cab39	0.16657	0.09127	0.10356	0.09238	0.46442	0.12965	0.1609	0.49148	0.39894	0.48287	-1.09894	0.2202	0.03171	-0.09254	-0.00861	-1.59042	-0.27128	-0.45977	0.08393	-1.49788	-0.17874	-0.36723	-1.58182	-0.26267	-0.45116	1.31914	1.13065	-0.18849
chr13	38503677	38503686	+	chr13	38503222	38503874	CDS	Txndc5	0.34217	0.25592	0.15	0.17935	0.7246	0.30196	0.35267	0.31766	0.83736	0.67365	-0.90788	0.13945	-0.0343	0.5197	0.35599	-1.22554	-0.17821	-0.35196	-0.16371	-1.74524	-0.69791	-0.87166	-1.58153	-0.5342	-0.70795	1.04733	0.87358	-0.17375
chr4	119181635	119181644	-	chr4	119181381	119181857	exon	Ermap	0.11139	0.0441	0.09608	0.06441	0.38055	0.15465	0.0796	0.5718	0.11162	0.37418	-1.2072	-0.27545	0.24228	-0.46018	-0.19762	-1.779	-0.84724	-0.32952	0.26256	-1.31882	-0.38706	0.13066	-1.58138	-0.64963	-0.1319	0.93175	1.44948	0.51772
chr2	71814192	71814201	+	chr2	71813892	71814336	NA	NA	1.21474	1.06879	0.40434	0.36167	1.2699	1.17252	1.25391	0.17055	1.39253	1.5216	-0.05955	0.0473	-0.04254	1.22197	1.35105	-0.2301	-0.12325	-0.21309	0.12907	-1.45208	-1.34523	-1.43507	-1.58115	-1.4743	-1.56414	0.10685	0.01701	-0.08984
chrX	12135210	12135219	-	chrX	12134944	12135455	exon	Bcor	0.16369	0.17353	0.12827	0.10435	0.49976	0.30787	0.27909	-0.05401	0.2131	0.37717	-1.20345	-0.64059	-0.53345	0.26711	0.43118	-1.14944	-0.58658	-0.47944	0.16407	-1.41655	-0.85369	-0.74656	-1.58062	-1.01776	-0.91062	0.56286	0.67	0.10714
chr3	60469423	60469432	-	chr3	60469178	60469558	NA	NA	0.10837	0.05529	0.10468	0.11373	0.52752	0.27652	0.29412	0.43825	0.02652	-0.03767	-1.6176	-0.87175	-0.93866	-0.41173	-0.47591	-2.05585	-1.30999	-1.3769	-0.06418	-1.64412	-0.89826	-0.96517	-1.57994	-0.83408	-0.90099	0.74586	0.67895	-0.06691
chr17	13056341	13056350	-	chr17	13056236	13056590	exon	Gm36226	0.06142	0.07768	0.03294	0.01956	0.24597	0.11742	0.06786	-0.14333	0.29151	0.45186	-1.12798	-0.44333	-0.05848	0.43484	0.59519	-0.98465	-0.3	0.08485	0.16036	-1.41948	-0.73483	-0.34999	-1.57984	-0.89519	-0.51035	0.68465	1.06949	0.38484
chr2	72117868	72117877	+	chr2	72117544	72118069	NA	NA	0.04917	0.04351	0.05945	0.02163	0.25204	0.10956	0.10818	0.05809	-0.09987	0.30761	-1.27173	-0.50698	-0.49718	-0.15796	0.24953	-1.32982	-0.56507	-0.55527	0.40749	-1.17186	-0.40711	-0.39731	-1.57935	-0.81459	-0.80479	0.76476	0.77456	0.0098
chr1	106401185	106401194	+	chr1	106400612	106401526	transcript	Phlpp1	0.15511	0.15006	0.08185	0.08525	0.44196	0.31537	0.24281	0.02952	0.50184	0.47425	-1.10457	-0.71606	-0.43478	0.47232	0.44473	-1.13409	-0.74557	-0.46429	-0.02759	-1.6064	-1.21789	-0.93661	-1.57881	-1.1903	-0.90902	0.38851	0.66979	0.28128
chr15	75876057	75876066	-	chr15	75875695	75876269	3UTR	Mroh6	0.06906	0.09461	0.05318	0.06436	0.37954	0.14386	0.07186	-0.2097	0.14758	0.04213	-1.53663	-0.54402	-0.02453	0.35729	0.25183	-1.32693	-0.33431	0.18518	-0.10545	-1.68422	-0.6916	-0.17211	-1.57876	-0.58614	-0.06666	0.99262	1.51211	0.51949
chr6	53068285	53068294	+	chr6	53067786	53069078	CDS	Jazf1	0.25827	0.21206	0.15061	0.09568	0.4728	0.38924	0.16541	0.20271	0.52575	0.89224	-0.68577	-0.45578	0.44108	0.32304	0.68952	-0.88848	-0.65849	0.23837	0.36649	-1.21152	-0.98153	-0.08467	-1.57801	-1.34802	-0.45116	0.22999	1.12685	0.89686
chr7	104104111	104104120	-	chr7	104103858	104104566	transcript	Olfr646	0.40681	0.15946	0.10858	0.11874	0.54139	0.37245	0.38327	0.9818	1.30471	1.2342	-0.34323	0.10249	0.06942	0.32291	0.25239	-1.32503	-0.87932	-0.91238	-0.07051	-1.64794	-1.20222	-1.23529	-1.57742	-1.13171	-1.16478	0.44571	0.41265	-0.03307
chr5	31512679	31512688	-	chr5	31512519	31512842	transcript	Gpn1	0.14418	0.08128	0.05526	0.09879	0.48178	0.25657	0.18857	0.44185	0.67332	0.30467	-1.27258	-0.55717	-0.24632	0.23148	-0.13718	-1.71443	-0.99901	-0.68817	-0.36866	-1.9459	-1.23049	-0.91964	-1.57724	-0.86183	-0.55098	0.71541	1.02626	0.31085
chr5	122769483	122769492	+	chr5	122769096	122769621	5UTR	Camkk2	0.55054	0.19718	0.26036	0.2352	0.88865	0.43409	0.45181	1.14568	0.8626	0.96877	-0.60822	0.28736	0.23977	-0.28308	-0.17691	-1.7539	-0.85832	-0.90591	0.10617	-1.47081	-0.57523	-0.62283	-1.57699	-0.68141	-0.729	0.89558	0.84799	-0.04759
chr15	78185074	78185083	-	chr15	78184810	78185262	3UTR	Pvalb	0.39371	0.16218	0.14045	0.22637	0.86221	0.47865	0.39162	0.9282	1.05595	0.6059	-0.97094	-0.23152	0.00619	0.12775	-0.3223	-1.89914	-1.15972	-0.92201	-0.45005	-2.02689	-1.28747	-1.04975	-1.57684	-0.83742	-0.59971	0.73942	0.97713	0.23771
chr2	128818116	128818125	-	chr2	128817417	128818914	5UTR	Tmem87b	0.55621	0.65571	0.66278	0.52281	1.74568	0.86702	0.76099	-0.20535	-0.21889	0.07605	-1.50012	-0.56348	-0.39487	-0.01354	0.2814	-1.29477	-0.35813	-0.18952	0.29494	-1.28123	-0.34459	-0.17598	-1.57617	-0.63953	-0.47092	0.93664	1.10525	0.16861
chr7	142460623	142460632	-	chr7	142460554	142461106	5UTR	Lsp1	0.0235	0.03258	0.00465	0	0.18675	0.09675	0.11575	-0.10717	0.25168	0.32116	-1.25484	-0.69785	-0.83466	0.35885	0.42833	-1.14767	-0.59068	-0.72749	0.06948	-1.50653	-0.94953	-1.08635	-1.57601	-1.01901	-1.15582	0.557	0.42018	-0.13682
chr11	55453800	55453809	-	chr11	55453416	55454020	transcript	Atox1	0.07751	0.04893	0.04376	0.05519	0.35107	0.24421	0.25191	0.26256	0.31562	0.20083	-1.37445	-0.97859	-1.01104	0.05306	-0.06174	-1.63701	-1.24116	-1.27361	-0.11479	-1.69007	-1.29421	-1.32667	-1.57528	-1.17942	-1.21187	0.39586	0.3634	-0.03245
chr12	85192868	85192877	+	chr12	85192393	85193153	NA	NA	0.17413	0.12648	0.08684	0.08757	0.44738	0.22668	0.24849	0.28199	0.56757	0.56177	-1.01303	-0.25798	-0.35284	0.28558	0.27977	-1.29502	-0.53998	-0.63483	-0.0058	-1.5806	-0.82555	-0.92041	-1.5748	-0.81975	-0.9146	0.75505	0.66019	-0.09486
chr12	33138060	33138069	-	chr12	33137915	33138181	exon	F730043M19Rik	0.05413	0.06589	0.04826	0.02142	0.25025	0.09147	0.15203	-0.11004	0.05823	0.35928	-1.21521	-0.32383	-0.731	0.16827	0.46932	-1.10517	-0.2138	-0.62097	0.30105	-1.27344	-0.38207	-0.78924	-1.57449	-0.68311	-1.09028	0.89137	0.4842	-0.40717
chr15	50870304	50870313	-	chr15	50870179	50870448	NA	NA	0.19405	0.11471	0.04386	0.02801	0.26986	0.24961	0.24261	0.46434	1.06175	1.23762	-0.3368	-0.25425	-0.22458	0.59741	0.77327	-0.80115	-0.71859	-0.68892	0.17587	-1.39856	-1.316	-1.28633	-1.57442	-1.49187	-1.4622	0.08255	0.11223	0.02967
chr10	28516305	28516314	-	chr10	28516150	28516450	NA	NA	0.2267	0.13862	0.11031	0.06098	0.36803	0.22156	0.1301	0.46282	0.64982	1.04794	-0.52642	0.02329	0.5166	0.187	0.58512	-0.98924	-0.43953	0.05377	0.39812	-1.17624	-0.62653	-0.13323	-1.57436	-1.02465	-0.53134	0.54971	1.04302	0.49331
chr1	13648035	13648044	+	chr1	13647784	13648239	CDS	Lactb2	0.07723	0.09304	0.03466	0.05332	0.34519	0.1541	0.17057	-0.12723	0.41168	0.21664	-1.35763	-0.53433	-0.62697	0.53891	0.34387	-1.23039	-0.4071	-0.49974	-0.19504	-1.7693	-0.94601	-1.03865	-1.57427	-0.75098	-0.84361	0.82329	0.73065	-0.09264
chr9	45251479	45251488	-	chr9	45251320	45251668	transcript	BC049352	0.3082	0.27308	0.10672	0.06975	0.39379	0.36571	0.2376	0.13173	1.00183	1.29511	-0.27819	-0.1927	0.27828	0.8701	1.16338	-0.40992	-0.32443	0.14655	0.29328	-1.28002	-1.19453	-0.72355	-1.5733	-1.48781	-1.01684	0.08549	0.55647	0.47098
chr2	6363379	6363388	+	chr2	6363228	6363506	NA	NA	0.18304	0.21897	0.22992	0.10245	0.49064	0.16275	0.2311	-0.17578	-0.22535	0.4954	-1.07677	0.10963	-0.2306	-0.04957	0.67118	-0.90099	0.28541	-0.05482	0.72075	-0.85141	0.33498	-0.00524	-1.57217	-0.38577	-0.726	1.1864	0.84617	-0.34022
chr18	39369656	39369665	+	chr18	39369201	39369769	exon	Gm15337	0.08825	0.09565	0.1085	0.04989	0.33432	0.19561	0.14232	-0.05734	-0.15181	0.34043	-1.23163	-0.66746	-0.37437	-0.09446	0.39777	-1.17429	-0.61012	-0.31703	0.49223	-1.07983	-0.51565	-0.22257	-1.57206	-1.00789	-0.7148	0.56417	0.85726	0.29309
chr18	61108739	61108748	-	chr18	61107607	61109131	exon	Csf1r	0.11727	0.1083	0.05855	0.10436	0.496	0.13877	0.17863	0.06252	0.46915	0.09086	-1.48053	-0.13966	-0.36747	0.40663	0.02834	-1.54305	-0.20218	-0.42999	-0.37829	-1.94968	-0.60881	-0.83662	-1.57139	-0.23052	-0.45833	1.34087	1.11306	-0.22781
chr11	116617077	116617086	+	chr11	116616807	116617090	5UTR	Rhbdf2	0.0562	0.08625	0.05962	0.04669	0.32458	0.14799	0.10934	-0.26271	-0.03243	0.0942	-1.47708	-0.68715	-0.43638	0.23029	0.35692	-1.21437	-0.42444	-0.17367	0.12663	-1.44465	-0.65473	-0.40395	-1.57128	-0.78136	-0.53059	0.78993	1.0407	0.25077
chr11	94791886	94791895	-	chr11	94791674	94792081	3UTR	Gm11546	0.06288	0.04621	0.03958	0.0345	0.28816	0.08813	0.14607	0.1618	0.23156	0.28739	-1.28316	-0.21499	-0.613	0.06976	0.12559	-1.44496	-0.37679	-0.7748	0.05583	-1.51472	-0.44655	-0.84456	-1.57055	-0.50238	-0.90038	1.06817	0.67016	-0.39801
chr13	28600927	28600936	-	chr13	28600681	28601272	exon	2610307P16Rik	0.32071	0.22862	0.11021	0.1217	0.54712	0.36916	0.25458	0.36202	1.02115	0.94227	-0.62818	-0.15932	0.25045	0.65913	0.58026	-0.9902	-0.52134	-0.11157	-0.07888	-1.64934	-1.18047	-0.77071	-1.57046	-1.10159	-0.69183	0.46887	0.87863	0.40977
chr2	129592674	129592683	-	chr2	129592437	129593757	5UTR	Sirpa	0.08507	0.16179	0.04236	0.03801	0.29853	0.18766	0.20264	-0.51383	0.39247	0.43916	-1.13119	-0.6527	-0.72739	0.90631	0.95299	-0.61735	-0.13887	-0.21356	0.04669	-1.52366	-1.04517	-1.11987	-1.57034	-1.09186	-1.16655	0.47849	0.40379	-0.07469
chr18	67478722	67478731	-	chr18	67478551	67478901	CDS	Prelid3a	0.13373	0.07453	0.09087	0.11546	0.5284	0.17483	0.1683	0.43376	0.30045	0.12051	-1.44951	-0.23913	-0.20368	-0.13332	-0.31325	-1.88328	-0.67289	-0.63745	-0.17993	-1.74996	-0.53957	-0.50413	-1.57003	-0.35964	-0.3242	1.21039	1.24583	0.03544
chr12	112594710	112594719	+	chr12	112593879	112594946	exon	Gm30048	0.17651	0.07977	0.06168	0.04695	0.32498	0.20763	0.15998	0.63776	0.79612	0.93927	-0.63073	-0.15696	0.09088	0.15835	0.30151	-1.26849	-0.79472	-0.54688	0.14316	-1.42684	-0.95308	-0.70524	-1.57	-1.09624	-0.84839	0.47377	0.72161	0.24784
chr13	43295867	43295876	-	chr13	43295039	43296279	5UTR	Gfod1	0.09844	0.08708	0.03716	0.05192	0.33964	0.22381	0.15565	0.08766	0.55221	0.39863	-1.17105	-0.72302	-0.37507	0.46454	0.31097	-1.25871	-0.81068	-0.46273	-0.15357	-1.72325	-1.27522	-0.92728	-1.56968	-1.12165	-0.7737	0.44803	0.79598	0.34795
chr15	36719447	36719456	-	chr15	36719289	36719619	exon	Gm41297	0.17239	0.15782	0.10209	0.1128	0.51996	0.22984	0.23761	0.08107	0.44154	0.36491	-1.20384	-0.2815	-0.31568	0.36047	0.28385	-1.28491	-0.36257	-0.39675	-0.07663	-1.64538	-0.72304	-0.75722	-1.56875	-0.64642	-0.6806	0.92234	0.88816	-0.03418
chr17	33524132	33524141	+	chr17	33523738	33525192	5UTR	Adamts10	0.39976	0.48429	0.45019	0.27228	0.99277	0.64713	0.40992	-0.22788	-0.14023	0.43061	-1.13777	-0.58567	-0.02937	0.08764	0.65849	-0.90989	-0.3578	0.19851	0.57084	-0.99753	-0.44544	0.11086	-1.56838	-1.01628	-0.45998	0.55209	1.1084	0.5563
chr2	32715092	32715101	-	chr2	32714971	32715468	exon	Gm33457	0.21829	0.18505	0.15101	0.13042	0.57182	0.31273	0.24423	0.16223	0.34973	0.47623	-1.09163	-0.38092	-0.11503	0.1875	0.31401	-1.25386	-0.54314	-0.27726	0.1265	-1.44136	-0.73065	-0.46476	-1.56787	-0.85715	-0.59126	0.71072	0.9766	0.26589
chr16	49987213	49987222	-	chr16	49986744	49987362	exon	Gm6936	0.36707	0.22653	0.10519	0.16232	0.66604	0.36173	0.31359	0.52418	1.20981	0.84642	-0.72078	0.0168	0.17776	0.68563	0.32223	-1.24497	-0.50739	-0.34642	-0.3634	-1.9306	-1.19302	-1.03205	-1.5672	-0.82962	-0.66865	0.73758	0.89855	0.16097
chr10	93336645	93336654	+	chr10	93335734	93336910	exon	Gm17745	0.13836	0.07475	0.05616	0	0.18499	0.09883	0.07725	0.46089	0.62901	1.30335	-0.26359	0.26871	0.4397	0.16812	0.84246	-0.72448	-0.19218	-0.02119	0.67434	-0.89261	-0.3603	-0.18931	-1.56694	-1.03463	-0.86364	0.53231	0.7033	0.17099
chr9	104281117	104281126	-	chr9	104281019	104281346	3UTR	Acpp	0.05207	0.07636	0.01191	0.03332	0.28365	0.13376	0.17987	-0.22158	0.46289	0.19784	-1.36888	-0.63997	-0.90568	0.68446	0.41941	-1.1473	-0.41839	-0.68411	-0.26505	-1.83176	-1.10286	-1.36857	-1.56672	-0.83781	-1.10352	0.72891	0.4632	-0.26571
chr8	117282266	117282275	-	chr8	117282156	117282913	NA	NA	0.35544	0.24924	0.36499	0.17449	0.70172	0.4043	0.49469	0.38866	-0.03032	0.74272	-0.82378	-0.14881	-0.38919	-0.41898	0.35406	-1.21245	-0.53747	-0.77785	0.77304	-0.79347	-0.11849	-0.35887	-1.5665	-0.89153	-1.13191	0.67498	0.43459	-0.24038
chr7	110689512	110689521	-	chr7	110689327	110689944	exon	Gm21123	0.19241	0.13935	0.11366	0.11012	0.51099	0.18266	0.15229	0.2953	0.46338	0.48816	-1.07817	0.04992	0.21752	0.16808	0.19286	-1.37347	-0.24538	-0.07778	0.02478	-1.54155	-0.41346	-0.24586	-1.56632	-0.43823	-0.27064	1.12809	1.29569	0.1676
chr13	112427662	112427671	+	chr13	112427528	112428158	transcript	Gm33905	0.10525	0.1633	0.11799	0.08129	0.42549	0.18147	0.24931	-0.36846	-0.08931	0.18459	-1.3814	-0.46682	-0.78417	0.27916	0.55305	-1.01294	-0.09835	-0.41571	0.2739	-1.29209	-0.37751	-0.69487	-1.56599	-0.6514	-0.96876	0.91459	0.59723	-0.31736
chr18	75579008	75579017	+	chr18	75578334	75579168	NA	NA	0.09991	0.10344	0.08776	0.06278	0.37064	0.12799	0.19127	-0.02599	0.09323	0.30621	-1.25964	-0.19487	-0.55635	0.11922	0.3322	-1.23365	-0.16888	-0.53035	0.21298	-1.35287	-0.2881	-0.64957	-1.56585	-0.50108	-0.86255	1.06477	0.7033	-0.36147
chr13	117048514	117048523	-	chr13	117048359	117048973	NA	NA	0.07398	0	0.00022	0.02066	0.24581	0.14762	0.02573	0.83587	0.83251	0.54993	-1.01535	-0.5238	0.48764	-0.00336	-0.28594	-1.85122	-1.35967	-0.34823	-0.28258	-1.84786	-1.3563	-0.34487	-1.56528	-1.07373	-0.06229	0.49156	1.503	1.01144
chr3	19258701	19258710	+	chr3	19258518	19259132	5UTR	Pde7a	0.30351	0.13507	0.07713	0.12122	0.5431	0.26955	0.23456	0.79454	1.2147	0.88441	-0.68019	0.12875	0.27464	0.42016	0.08988	-1.47472	-0.66578	-0.51989	-0.33029	-1.89489	-1.08595	-0.94006	-1.5646	-0.75566	-0.60977	0.80894	0.95483	0.14589
chr4	121197090	121197099	-	chr4	121197009	121197401	NA	NA	0.07384	0.02748	0.02953	0.02424	0.25616	0.07978	0.06705	0.46555	0.44146	0.50447	-1.05981	-0.0501	0.05949	-0.02409	0.03892	-1.52536	-0.51565	-0.40606	0.06301	-1.50127	-0.49156	-0.38197	-1.56428	-0.55457	-0.44498	1.00971	1.1193	0.10959
chr8	125600222	125600231	-	chr8	125600047	125600831	transcript	4930567H12Rik	0.08187	0.09917	0.05577	0.02675	0.26348	0.09934	0.21227	-0.13518	0.2314	0.54155	-1.02231	-0.13645	-0.79942	0.36658	0.67673	-0.88713	-0.00127	-0.66424	0.31015	-1.25372	-0.36785	-1.03083	-1.56386	-0.678	-1.34097	0.88587	0.22289	-0.66298
chr4	138464133	138464142	+	chr4	138463785	138464294	transcript	Camk2n1	0.13762	0.11635	0.05967	0.06813	0.38541	0.22901	0.14874	0.13881	0.59114	0.51394	-1.0487	-0.47938	-0.06758	0.45232	0.37513	-1.18751	-0.61819	-0.20639	-0.07719	-1.63983	-1.07051	-0.65872	-1.56264	-0.99332	-0.58152	0.56932	0.98112	0.4118
chr10	93261449	93261458	+	chr10	93261301	93262593	CDS	Elk3	0.13798	0.18644	0.05609	0.08674	0.44026	0.2646	0.17783	-0.27342	0.62733	0.35964	-1.20266	-0.62783	-0.22848	0.90075	0.63307	-0.92924	-0.3544	0.04495	-0.26768	-1.82999	-1.25515	-0.8558	-1.56231	-0.98747	-0.58812	0.57484	0.97419	0.39935
chr19	5930464	5930473	-	chr19	5930271	5930569	NA	NA	0.09715	0.13327	0.0748	0.0785	0.41591	0.24258	0.26117	-0.2494	0.17914	0.14791	-1.41436	-0.81543	-0.89293	0.42854	0.39731	-1.16496	-0.56603	-0.64353	-0.03124	-1.5935	-0.99457	-1.07207	-1.56226	-0.96333	-1.04084	0.59893	0.52142	-0.0775
chr8	40584900	40584909	-	chr8	40584637	40585059	CDS	Mtmr7	0.11299	0.06734	0.05216	0.04805	0.32594	0.14518	0.22745	0.35896	0.50129	0.54237	-1.01974	-0.2083	-0.63441	0.14232	0.1834	-1.3787	-0.56727	-0.99338	0.04108	-1.52103	-0.70959	-1.1357	-1.56211	-0.75067	-1.17678	0.81144	0.38533	-0.42611
chr4	8854234	8854243	+	chr4	8853924	8854425	CDS	Chd7	0.12215	0.04011	0.02353	0.06185	0.36659	0.16837	0.1523	0.6876	0.87761	0.47123	-1.09057	-0.27928	-0.18818	0.19001	-0.21637	-1.77816	-0.96687	-0.87578	-0.40638	-1.96817	-1.15688	-1.06579	-1.5618	-0.75051	-0.65941	0.81129	0.90239	0.0911
chr9	40784241	40784250	+	chr9	40784071	40784386	3UTR	Clmp	0.1922	0.18388	0.06902	0.08177	0.4252	0.20695	0.38021	0.04252	0.81102	0.70254	-0.8587	-0.07244	-0.728	0.7685	0.66002	-0.90123	-0.11496	-0.77053	-0.10848	-1.66973	-0.88346	-1.53903	-1.56125	-0.77498	-1.43055	0.78626	0.1307	-0.65556
chr9	65535350	65535359	-	chr9	65535071	65535787	NA	NA	0.1707	0.14211	0.12394	0.11994	0.53779	0.22802	0.22616	0.16473	0.28014	0.30683	-1.2543	-0.28255	-0.2742	0.1154	0.14209	-1.41903	-0.44728	-0.43893	0.02669	-1.53443	-0.56268	-0.55433	-1.56112	-0.58938	-0.58103	0.97175	0.9801	0.00835
chr2	19388960	19388969	-	chr2	19388449	19389132	transcript	Msrb2	0.53688	0.25933	0.19477	0.2253	0.8484	0.43386	0.40752	0.8359	1.12677	0.9819	-0.57879	0.2571	0.33091	0.29087	0.14599	-1.41469	-0.5788	-0.50499	-0.14487	-1.70555	-0.86967	-0.79586	-1.56068	-0.7248	-0.65098	0.83588	0.9097	0.07381
chr4	149856610	149856619	+	chr4	149856329	149856776	NA	NA	0.48591	0.32323	0.11533	0.19341	0.75417	0.44123	0.37826	0.47474	1.46895	1.01209	-0.54833	0.11562	0.29611	0.99421	0.53734	-1.02307	-0.35913	-0.17864	-0.45686	-2.01728	-1.35333	-1.17284	-1.56041	-0.89647	-0.71598	0.66395	0.84443	0.18049
chr9	71951456	71951465	+	chr9	71951048	71951775	NA	NA	0.1731	0.20018	0.09171	0.11067	0.5101	0.23257	0.18726	-0.1392	0.52374	0.38367	-1.17665	-0.28977	-0.07446	0.66293	0.52286	-1.03746	-0.15057	0.06474	-0.14007	-1.70039	-0.8135	-0.59819	-1.56032	-0.67344	-0.45813	0.88689	1.1022	0.21531
chr4	3648406	3648415	+	chr4	3648387	3649926	exon	Gm42250	0.06012	0.0591	0.05426	0.03884	0.2982	0.12248	0.14666	0.00956	0.05583	0.21399	-1.34612	-0.48951	-0.6421	0.04627	0.20443	-1.35568	-0.49907	-0.65167	0.15816	-1.40195	-0.54534	-0.69793	-1.56011	-0.7035	-0.85609	0.85661	0.70401	-0.1526
chr6	73255069	73255078	+	chr6	73254400	73255295	transcript	Gm38834	0.11512	0.07208	0.02745	0.03925	0.29936	0.1515	0.15838	0.33201	0.78273	0.64921	-0.91071	-0.23114	-0.27097	0.45072	0.31721	-1.24272	-0.56314	-0.60298	-0.13351	-1.69344	-1.01386	-1.0537	-1.55993	-0.88035	-0.92019	0.67958	0.63974	-0.03983
chr8	108749096	108749105	-	chr8	108748731	108749694	NA	NA	0.15873	0.11635	0.0782	0.10021	0.4787	0.17091	0.19241	0.26452	0.55285	0.37955	-1.17939	-0.06784	-0.18032	0.28833	0.11503	-1.4439	-0.33236	-0.44484	-0.1733	-1.73223	-0.62069	-0.73316	-1.55894	-0.44739	-0.55987	1.11155	0.99907	-0.11248
chr4	108318837	108318846	-	chr4	108318713	108319028	NA	NA	0.10491	0.06935	0.05688	0.04819	0.32537	0.11911	0.1212	0.28376	0.39814	0.48357	-1.07516	-0.09936	-0.11343	0.11438	0.19982	-1.35891	-0.38312	-0.39718	0.08544	-1.47329	-0.4975	-0.51156	-1.55873	-0.58294	-0.597	0.97579	0.96173	-0.01406
chr1	84935895	84935904	-	chr1	84935745	84936020	exon	Gm39669	0.08511	0.04037	0.02715	0.05785	0.3538	0.14074	0.10702	0.41397	0.56309	0.23784	-1.3208	-0.38974	-0.16627	0.14912	-0.17613	-1.73477	-0.80371	-0.58024	-0.32525	-1.88389	-0.95283	-0.72936	-1.55864	-0.62758	-0.40411	0.93106	1.15453	0.22347
chr10	127481299	127481308	-	chr10	127481144	127481828	CDS	R3hdm2	0.17611	0.12577	0.15495	0.10872	0.50341	0.36974	0.28991	0.29725	0.11758	0.41362	-1.14444	-0.77921	-0.50683	-0.17967	0.11637	-1.44169	-1.07646	-0.80407	0.29604	-1.26202	-0.89679	-0.6244	-1.55806	-1.19283	-0.92044	0.36523	0.63762	0.27239
chrY	90744791	90744800	+	chrY	90743939	90744940	stop_codon	Gm52481	0.5206	0.51474	0.54763	0.72919	2.33008	1.41037	0.66459	0.01382	-0.06207	-0.42143	-1.97928	-1.29109	-0.30356	-0.07589	-0.43524	-1.9931	-1.30491	-0.31738	-0.35936	-1.91721	-1.22902	-0.24149	-1.55785	-0.86966	0.11787	0.68819	1.67572	0.98753
chr6	134277278	134277287	-	chr6	134276955	134277328	transcript	Etv6	0.05524	0.01575	0.0203	0.02326	0.25157	0.08902	0.06093	0.44255	0.38407	0.34727	-1.20997	-0.29392	-0.05389	-0.05847	-0.09528	-1.65252	-0.73647	-0.49644	-0.03681	-1.59404	-0.67799	-0.43797	-1.55724	-0.64119	-0.40116	0.91605	1.15608	0.24003
chr4	101172876	101172885	-	chr4	101172749	101173080	transcript	Jak1	0.12178	0.09773	0.06927	0.07544	0.40502	0.16396	0.07882	0.17028	0.40176	0.34833	-1.20859	-0.25731	0.31988	0.23149	0.17805	-1.37886	-0.42759	0.1496	-0.05343	-1.61035	-0.65908	-0.08189	-1.55692	-0.60564	-0.02845	0.95128	1.52846	0.57719
chr5	111553737	111553746	+	chr5	111553368	111554156	exon	Gm36274	0.07698	0.07109	0.04593	0.0619	0.36498	0.18127	0.21526	0.0505	0.28865	0.133	-1.42328	-0.68622	-0.85405	0.23816	0.0825	-1.47378	-0.73672	-0.90455	-0.15565	-1.71194	-0.97488	-1.14271	-1.55628	-0.81922	-0.98705	0.73706	0.56923	-0.16783
chr8	111821347	111821356	+	chr8	111821282	111821714	CDS	Cfdp1	0.19268	0.08389	0.08304	0.10428	0.48952	0.18701	0.1389	0.68769	0.69459	0.53134	-1.0247	0.02879	0.29944	0.0069	-0.15635	-1.71239	-0.65889	-0.38825	-0.16325	-1.71929	-0.66579	-0.39515	-1.55604	-0.50255	-0.2319	1.0535	1.32414	0.27065
chr6	86784852	86784861	-	chr6	86784727	86785175	5UTR	Anxa4	0.12519	0.06464	0.0211	0.09325	0.45677	0.04586	0.16118	0.4658	0.92781	0.22694	-1.32828	0.64727	-0.2191	0.46201	-0.23886	-1.79408	0.18147	-0.6849	-0.70087	-2.25609	-0.28054	-1.14691	-1.55521	0.42033	-0.44604	1.97554	1.10918	-0.86637
chr14	60736762	60736771	+	chr14	60736045	60737185	transcript	Spata13	0.26519	0.27893	0.21861	0.21177	0.80496	0.5951	0.45846	-0.05412	0.20023	0.23213	-1.32291	-0.93949	-0.62077	0.25435	0.28625	-1.26879	-0.88536	-0.56665	0.03189	-1.52314	-1.13972	-0.82101	-1.55503	-1.17161	-0.8529	0.38342	0.70214	0.31871
chr1	155283965	155283974	+	chr1	155283864	155284120	CDS	Xpr1	0.06216	0.10064	0.05511	0.03866	0.29626	0.10112	0.10631	-0.31733	0.06654	0.23488	-1.32003	-0.32088	-0.3587	0.38387	0.55221	-1.0027	-0.00355	-0.04137	0.16834	-1.38657	-0.38742	-0.42524	-1.55491	-0.55576	-0.59358	0.99915	0.96133	-0.03782
chr11	54802052	54802061	+	chr11	54801743	54802522	NA	NA	0.26397	0.18425	0.08441	0.09932	0.47439	0.32371	0.29538	0.36317	1.00363	0.88799	-0.66667	-0.22252	-0.12126	0.64046	0.52482	-1.02984	-0.58569	-0.48443	-0.11564	-1.6703	-1.22615	-1.12489	-1.55466	-1.11051	-1.00925	0.44415	0.54541	0.10126
chr14	66296968	66296977	+	chr14	66296547	66297709	transcript	1700001G11Rik	1.46219	1.48996	1.24375	0.79776	2.52444	1.40433	1.2568	-0.02551	0.21817	0.80312	-0.7506	0.05465	0.20417	0.24369	0.82863	-0.72508	0.08017	0.22968	0.58495	-0.96877	-0.16352	-0.014	-1.55371	-0.74846	-0.59895	0.80525	0.95476	0.14952
chr7	84163753	84163762	-	chr7	84163655	84163952	exon	Gm39044	0.04536	0.04165	0.02422	0.06381	0.36951	0.09893	0.16248	0.03886	0.23688	-0.17907	-1.73198	-0.46854	-0.87885	0.19802	-0.21793	-1.77083	-0.5074	-0.91771	-0.41595	-1.96886	-0.70542	-1.11573	-1.55291	-0.28947	-0.69978	1.26343	0.85313	-0.41031
chr7	7299523	7299532	-	chr7	7299401	7299741	transcript	Clcn4	0.97407	1.0956	0.9448	0.80093	2.53164	1.31488	1.03089	-0.15544	0.04008	0.25509	-1.29746	-0.39946	-0.07476	0.19551	0.41053	-1.14203	-0.24403	0.08068	0.21502	-1.33754	-0.43954	-0.11484	-1.55256	-0.65456	-0.32985	0.898	1.2227	0.3247
chr19	21144856	21144865	-	chr19	21144589	21145060	exon	Gm32979	0.42806	0.33981	0.15337	0.15229	0.62874	0.42022	0.27704	0.26701	1.07678	1.08308	-0.46907	0.02182	0.49236	0.80977	0.81607	-0.73608	-0.24519	0.22535	0.00631	-1.54585	-1.05496	-0.58442	-1.55215	-1.06127	-0.59072	0.49089	0.96143	0.47054
chr12	98800566	98800575	-	chr12	98800362	98800731	CDS	Eml5	0.11512	0.17087	0.06025	0.04781	0.32221	0.10965	0.14266	-0.34059	0.43845	0.55955	-0.99212	0.03819	-0.17828	0.77904	0.90015	-0.65153	0.37878	0.16231	0.12111	-1.43057	-0.40025	-0.61673	-1.55168	-0.52136	-0.73784	1.03032	0.81384	-0.21648
chr8	35634128	35634137	-	chr8	35633827	35634323	transcript	Mfhas1	0.09921	0.19132	0.18195	0.09642	0.46427	0.2053	0.24758	-0.56181	-0.51368	0.02096	-1.52957	-0.63076	-0.82124	0.04813	0.58277	-0.96776	-0.06895	-0.25943	0.53464	-1.0159	-0.11708	-0.30757	-1.55053	-0.65172	-0.8422	0.89881	0.70833	-0.19048
chr11	95146275	95146284	-	chr11	95145981	95146415	transcript	Dlx4	0.15619	0.16538	0.01779	0.09147	0.44966	0.2436	0.21954	-0.05199	1.16045	0.43134	-1.1189	-0.43192	-0.32533	1.21244	0.48333	-1.06691	-0.37993	-0.27334	-0.72912	-2.27935	-1.59237	-1.48579	-1.55024	-0.86325	-0.75667	0.68699	0.79357	0.10658
chr7	128065779	128065788	-	chr7	128065505	128065915	CDS	Itgam	0.12784	0.03947	0.03912	0.05743	0.34965	0.17779	0.08475	0.73193	0.73571	0.55011	-0.99909	-0.29267	0.31118	0.00378	-0.18182	-1.73102	-1.0246	-0.42074	-0.1856	-1.7348	-1.02838	-0.42453	-1.5492	-0.84279	-0.23893	0.70642	1.31028	0.60386
chr6	144919924	144919933	-	chr6	144919556	144920132	NA	NA	0.43459	0.14299	0.17909	0.11898	0.52958	0.30342	0.39135	1.15648	0.95213	1.31042	-0.23832	0.41126	0.12306	-0.20435	0.15394	-1.39481	-0.74522	-1.03342	0.35829	-1.19046	-0.54088	-0.82907	-1.54874	-0.89916	-1.18736	0.64958	0.36138	-0.2882
chr9	57517261	57517270	-	chr9	57517148	57517419	5UTR	Cox5a	0.27435	0.30605	0.18468	0.20643	0.78533	0.2962	0.26504	-0.11903	0.40215	0.29383	-1.25476	-0.08308	0.03691	0.52118	0.41285	-1.13573	0.03594	0.15593	-0.10833	-1.65691	-0.48523	-0.36525	-1.54859	-0.37691	-0.25692	1.17168	1.29167	0.11999
chr18	65001332	65001341	-	chr18	65000933	65001582	5UTR	Nedd4l	0.09019	0.12376	0.09768	0.11476	0.51713	0.09648	0.17696	-0.24124	-0.05743	-0.18042	-1.72892	-0.04838	-0.55626	0.18381	0.06082	-1.48768	0.19286	-0.31502	-0.12299	-1.67149	0.00905	-0.49883	-1.5485	0.13204	-0.37584	1.68054	1.17266	-0.50788
chr16	93552755	93552764	+	chr16	93552665	93553054	NA	NA	0.08799	0.05871	0.01762	0.03446	0.28224	0.14682	0.15496	0.25269	0.70402	0.50172	-1.04677	-0.40361	-0.45152	0.45133	0.24903	-1.29946	-0.6563	-0.70421	-0.2023	-1.75079	-1.10763	-1.15554	-1.54849	-0.90533	-0.95324	0.64316	0.59525	-0.04791
chr7	30394657	30394666	-	chr7	30394078	30395201	transcript	Gm42376	0.32324	0.18398	0.15657	0.13248	0.56886	0.3371	0.29658	0.58546	0.73509	0.88077	-0.66751	-0.04712	0.0952	0.14963	0.2953	-1.25297	-0.63258	-0.49026	0.14568	-1.4026	-0.78221	-0.63989	-1.54827	-0.92788	-0.78557	0.62039	0.76271	0.14232
chr5	145114699	145114708	-	chr5	145113854	145115249	5UTR	Arpc1b	0.43175	0.27328	0.26217	0.33082	1.1486	0.67241	0.37441	0.5172	0.56148	0.30736	-1.24052	-0.54352	0.16652	0.04428	-0.20984	-1.75772	-1.06072	-0.35068	-0.25412	-1.802	-1.10501	-0.39496	-1.54788	-0.85089	-0.14084	0.69699	1.40704	0.71005
chr16	5431896	5431905	+	chr16	5431168	5432197	exon	Gm41414	0.07804	0.02135	0.02012	0.03193	0.27467	0.10738	0.07514	0.5757	0.59113	0.44936	-1.09847	-0.22687	0.02449	0.01543	-0.12634	-1.67417	-0.80257	-0.55121	-0.14177	-1.6896	-0.818	-0.56664	-1.54782	-0.67623	-0.42487	0.8716	1.12296	0.25136
chr2	168429828	168429837	-	chr2	168429630	168429945	transcript	Gm33359	0.10704	0.05453	0.02954	0.05204	0.33331	0.17838	0.10812	0.43609	0.70138	0.46044	-1.08685	-0.43767	-0.00772	0.26529	0.02435	-1.52295	-0.87376	-0.44381	-0.24094	-1.78823	-1.13905	-0.7091	-1.5473	-0.89811	-0.46816	0.64918	1.07913	0.42995
chr17	44239634	44239643	-	chr17	44238988	44239962	CDS	Clic5	0.53385	0.19478	0.14057	0.20747	0.78742	0.67883	0.38754	1.11978	1.41944	1.05778	-0.48924	-0.29962	0.38259	0.29966	-0.06199	-1.60902	-1.4194	-0.73719	-0.36166	-1.90868	-1.71906	-1.03685	-1.54703	-1.35741	-0.67519	0.18962	0.87183	0.68221
chr11	109269733	109269742	+	chr11	109269332	109270180	CDS	Rgs9	0.16781	0.1846	0.08951	0.08317	0.42415	0.27947	0.19487	-0.08959	0.51207	0.56273	-0.98417	-0.51206	-0.14177	0.60167	0.65232	-0.89458	-0.42247	-0.05218	0.05065	-1.49624	-1.02414	-0.65385	-1.5469	-1.07479	-0.7045	0.47211	0.8424	0.37029
chr13	44587893	44587902	-	chr13	44587799	44588192	NA	NA	0.15654	0.07781	0.09457	0.07154	0.39014	0.13926	0.14475	0.54357	0.40947	0.59712	-0.94969	0.103	0.06947	-0.1341	0.05355	-1.49326	-0.44057	-0.4741	0.18765	-1.35916	-0.30647	-0.34	-1.54681	-0.49413	-0.52765	1.05268	1.01916	-0.03353
chr8	31150275	31150284	+	chr8	31149326	31150936	5UTR	Tti2	1.12652	0.47265	0.68044	0.7166	2.2746	1.49645	1.19017	1.10663	0.6561	0.59028	-0.9564	-0.38187	-0.07333	-0.45052	-0.51634	-2.06302	-1.4885	-1.17995	-0.06582	-1.6125	-1.03797	-0.72943	-1.54668	-0.97215	-0.66361	0.57453	0.88307	0.30854
chr1	152798317	152798326	-	chr1	152798166	152798497	NA	NA	0.23128	0.15882	0.06634	0.10825	0.49719	0.20105	0.2128	0.36325	1.01941	0.68487	-0.86144	0.14061	0.08432	0.65615	0.32161	-1.2247	-0.22264	-0.27894	-0.33454	-1.88085	-0.8788	-0.93509	-1.54631	-0.54426	-0.60055	1.00205	0.94576	-0.05629
chr7	126721789	126721798	-	chr7	126721655	126721961	NA	NA	0.06569	0.08317	0.03718	0.05778	0.34941	0.08654	0.182	-0.14964	0.28324	0.07317	-1.47192	-0.17678	-0.78844	0.43287	0.22281	-1.32229	-0.02715	-0.63881	-0.21006	-1.75516	-0.46002	-1.07168	-1.5451	-0.24996	-0.86162	1.29514	0.68348	-0.61166
chr10	77266360	77266369	-	chr10	77266231	77266634	exon	Pofut2	0.07212	0.08457	0.01897	0.04318	0.30668	0.0875	0.13671	-0.10411	0.55527	0.2757	-1.26896	-0.12756	-0.47325	0.65938	0.37981	-1.16484	-0.02345	-0.36913	-0.27957	-1.82422	-0.68283	-1.02851	-1.54465	-0.40326	-0.74895	1.1414	0.79571	-0.34569
chr14	27045274	27045283	-	chr14	27044852	27045421	exon	Il17rd	0.18153	0.14705	0.06424	0.06986	0.38441	0.22254	0.16854	0.19269	0.79913	0.74885	-0.79548	-0.20001	0.06961	0.60644	0.55616	-0.98817	-0.3927	-0.12308	-0.05027	-1.59461	-0.99913	-0.72952	-1.54434	-0.94886	-0.67925	0.59547	0.86509	0.26962
chr8	125531842	125531851	-	chr8	125531681	125532093	transcript	4930566D17Rik	0.06651	0.09147	0.0573	0.02106	0.24198	0.221	0.13573	-0.20822	0.08511	0.47939	-1.06454	-0.97159	-0.5166	0.29334	0.68761	-0.85632	-0.76337	-0.30838	0.39428	-1.14965	-1.0567	-0.60171	-1.54393	-1.45098	-0.99599	0.09295	0.54794	0.45499
chr14	50997315	50997324	-	chr14	50997152	50997419	NA	NA	0.10634	0.09269	0.09981	0.04379	0.30808	0.11546	0.16185	0.10167	0.04775	0.53916	-1.00413	-0.06415	-0.35246	-0.05393	0.43749	-1.1058	-0.16582	-0.45413	0.49142	-1.05188	-0.11189	-0.4002	-1.54329	-0.60331	-0.89162	0.93998	0.65167	-0.28831
chr15	64040954	64040963	+	chr15	64040720	64041149	NA	NA	0.06545	0.07773	0.05648	0.05976	0.35454	0.11687	0.1263	-0.10688	0.0834	0.05234	-1.49068	-0.4027	-0.46574	0.19027	0.15922	-1.3838	-0.29582	-0.35886	-0.03106	-1.57407	-0.4861	-0.54914	-1.54302	-0.45504	-0.51808	1.08798	1.02493	-0.06304
chr16	33080208	33080217	-	chr16	33080139	33080428	5UTR	Lmln	0.0623	0.04638	0.01829	0.02249	0.24592	0.14406	0.0882	0.15472	0.47619	0.42332	-1.11963	-0.60622	-0.22088	0.32147	0.26861	-1.27435	-0.76094	-0.3756	-0.05286	-1.59582	-1.0824	-0.69706	-1.54296	-1.02954	-0.6442	0.51342	0.89875	0.38534
chr7	122347635	122347644	+	chr7	122347478	122347814	NA	NA	0.11256	0.03766	0.03625	0.07726	0.40544	0.10152	0.15757	0.64875	0.66426	0.27001	-1.27273	0.07915	-0.28409	0.0155	-0.37874	-1.92148	-0.56961	-0.93284	-0.39424	-1.93698	-0.58511	-0.94834	-1.54274	-0.19087	-0.5541	1.35187	0.98864	-0.36323
chr4	63399484	63399493	-	chr4	63399262	63399592	exon	Gm52742	0.29168	0.23854	0.15328	0.18237	0.71136	0.31402	0.23948	0.21373	0.64074	0.48043	-1.06174	-0.08118	0.20966	0.42701	0.26671	-1.27547	-0.29491	-0.00407	-0.1603	-1.70248	-0.72192	-0.43108	-1.54218	-0.56162	-0.27078	0.98056	1.2714	0.29084
chr5	75238661	75238670	+	chr5	75238326	75238700	NA	NA	0.10734	0.1809	0.04679	0.06769	0.37717	0.14757	0.16716	-0.44879	0.51532	0.31596	-1.22559	-0.26251	-0.37489	0.96411	0.76476	-0.77679	0.18628	0.0739	-0.19936	-1.74091	-0.77783	-0.89021	-1.54155	-0.57847	-0.69085	0.96308	0.8507	-0.11238
chr12	104990908	104990917	+	chr12	104990614	104991232	5UTR	Syne3	0.4533	0.60221	0.3851	0.20096	0.76494	0.46431	0.36176	-0.34705	0.19191	0.89125	-0.64999	-0.02872	0.26393	0.53896	1.2383	-0.30294	0.31833	0.61098	0.69934	-0.8419	-0.22063	0.07201	-1.54124	-0.91997	-0.62732	0.62126	0.91391	0.29265
chr5	139702413	139702422	+	chr5	139702160	139703233	3UTR	Micall2	0.68542	0.71438	0.35079	0.29947	1.05039	0.63019	0.54467	-0.05262	0.80893	0.98569	-0.55396	0.106	0.28723	0.86154	1.03831	-0.50134	0.15861	0.33984	0.17677	-1.36289	-0.70293	-0.5217	-1.53965	-0.8797	-0.69847	0.65996	0.84119	0.18123
chr17	35172630	35172639	-	chr17	35172336	35172786	CDS	Aif1	0.10583	0.08997	0.04186	0.05607	0.34276	0.14347	0.22442	0.11915	0.5558	0.41254	-1.12709	-0.24869	-0.67149	0.43666	0.29339	-1.24624	-0.36783	-0.79063	-0.14326	-1.68289	-0.80449	-1.22729	-1.53963	-0.66123	-1.08403	0.8784	0.4556	-0.4228
chr6	125313857	125313866	+	chr6	125313127	125314506	transcript	Ltbr	0.76509	0.51949	0.38985	0.37743	1.27656	0.71761	0.67712	0.4856	0.82792	0.86542	-0.67373	0.082	0.15581	0.34232	0.37982	-1.15933	-0.4036	-0.3298	0.0375	-1.50165	-0.74593	-0.67212	-1.53915	-0.78342	-0.70961	0.75573	0.82953	0.07381
chr8	41016445	41016454	-	chr8	41016177	41016878	start_codon	Mtus1	0.1335	0.06683	0.05258	0.0252	0.2529	0.12883	0.22735	0.49967	0.6333	0.93104	-0.60811	0.02989	-0.49782	0.13363	0.43137	-1.10778	-0.46978	-0.99749	0.29774	-1.24141	-0.60341	-1.13112	-1.53915	-0.90115	-1.42886	0.638	0.11029	-0.52771
chr4	41315083	41315092	+	chr4	41313807	41315181	CDS	Dcaf12	0.28424	0.3363	0.25704	0.23195	0.85368	0.44829	0.2283	-0.18593	0.10759	0.2145	-1.32453	-0.51947	0.23073	0.29352	0.40042	-1.1386	-0.33355	0.41666	0.10691	-1.43212	-0.62707	0.12314	-1.53902	-0.73397	0.01623	0.80505	1.55526	0.75021
chr5	20932695	20932704	-	chr5	20932628	20932936	NA	NA	0.21728	0.31115	0.16802	0.11828	0.52324	0.32141	0.27353	-0.37997	0.24832	0.5517	-0.98704	-0.41603	-0.23947	0.62829	0.93168	-0.60707	-0.03606	0.1405	0.30339	-1.23536	-0.66435	-0.48779	-1.53875	-0.96774	-0.79118	0.57101	0.74757	0.17656
chr13	23911539	23911548	+	chr13	23911401	23911645	5UTR	Slc17a4	0.20862	0.10568	0.09174	0.07593	0.40002	0.23784	0.18019	0.5992	0.70347	0.83164	-0.7066	-0.13288	0.14221	0.10427	0.23243	-1.3058	-0.73208	-0.457	0.12816	-1.41007	-0.83635	-0.56127	-1.53824	-0.96451	-0.68943	0.57373	0.84881	0.27508
chr2	19145503	19145512	+	chr2	19145342	19145865	NA	NA	0.07347	0.05859	0.02095	0.0464	0.31419	0.16073	0.17932	0.13403	0.54191	0.25395	-1.28407	-0.60433	-0.70586	0.40788	0.11991	-1.4181	-0.73836	-0.83989	-0.28797	-1.82598	-1.14624	-1.24777	-1.53801	-0.85827	-0.9598	0.67974	0.57821	-0.10153
chr9	80081168	80081177	+	chr9	80080873	80081338	NA	NA	0.16326	0.13995	0.1314	0.09888	0.46654	0.28007	0.20636	0.13689	0.19054	0.41506	-1.12283	-0.53964	-0.22326	0.05365	0.27817	-1.25972	-0.67653	-0.36015	0.22451	-1.31337	-0.73019	-0.41381	-1.53789	-0.9547	-0.63832	0.58319	0.89957	0.31638
chr19	12463923	12463932	-	chr19	12463784	12464013	3UTR	Mpeg1	0.06904	0	0.04125	0.02065	0.23934	0.09761	0.05979	0.79287	0.26914	0.50706	-1.03064	-0.23262	0.08413	-0.52373	-0.28581	-1.82351	-1.02549	-0.70874	0.23791	-1.29978	-0.50176	-0.18501	-1.5377	-0.73968	-0.42293	0.79802	1.11477	0.31675
chr1	97580318	97580327	-	chr1	97580251	97580732	NA	NA	0.14634	0.07323	0.03596	0.05365	0.33514	0.32744	0.18694	0.52259	0.88574	0.70195	-0.83571	-0.80961	-0.22497	0.36315	0.17937	-1.3583	-1.33219	-0.74756	-0.18378	-1.72145	-1.69534	-1.11071	-1.53767	-1.51156	-0.92692	0.02611	0.61074	0.58464
chr7	132335462	132335471	+	chr7	132335365	132335744	NA	NA	0.11743	0.12293	0.09997	0.0439	0.30678	0.18896	0.22977	-0.03701	0.12419	0.61565	-0.92183	-0.41999	-0.6142	0.1612	0.65266	-0.88482	-0.38298	-0.57719	0.49146	-1.04602	-0.54418	-0.73839	-1.53747	-1.03564	-1.22985	0.50184	0.30763	-0.19421
chr17	27451950	27451959	-	chr17	27451768	27452130	CDS	Grm4	0.22737	0.21189	0.15524	0.10861	0.4944	0.23558	0.12497	0.07117	0.36638	0.66487	-0.87205	-0.03637	0.55298	0.29521	0.59371	-0.94322	-0.10753	0.48181	0.2985	-1.23843	-0.40274	0.1866	-1.53693	-0.70124	-0.1119	0.83569	1.42503	0.58934
chr17	30197789	30197798	-	chr17	30197502	30198030	CDS	Zfand3	0.14994	0.05373	0.02085	0.05065	0.32607	0.12861	0.08758	0.7226	1.08512	0.75295	-0.78348	0.13187	0.42541	0.36251	0.03034	-1.50609	-0.59074	-0.29719	-0.33217	-1.8686	-0.95325	-0.6597	-1.53643	-0.62108	-0.32753	0.91535	1.2089	0.29355
chr2	27350458	27350467	+	chr2	27350285	27350736	NA	NA	0.0626	0.02406	0.00829	0.08155	0.4157	0.11663	0.16141	0.40681	0.6132	-0.16455	-1.70097	-0.42704	-0.70484	0.20639	-0.57136	-2.10778	-0.83385	-1.11165	-0.77775	-2.31417	-1.04024	-1.31804	-1.53642	-0.26249	-0.54029	1.27393	0.99613	-0.2778
chr5	65960478	65960487	+	chr5	65960005	65960640	transcript	Chrna9	0.59217	0.25374	0.1833	0.18652	0.7199	0.71834	0.28337	0.98005	1.30634	1.2897	-0.2462	-0.24344	0.86216	0.3263	0.30966	-1.22625	-1.22348	-0.11789	-0.01664	-1.55255	-1.54978	-0.44419	-1.53591	-1.53314	-0.42755	0.00277	1.10836	1.10559
chr7	100950738	100950747	-	chr7	100949886	100950979	transcript	P2ry6	0.09816	0.15915	0.12688	0.08266	0.41862	0.20945	0.23948	-0.39723	-0.20071	0.12117	-1.41441	-0.65846	-0.7945	0.19652	0.5184	-1.01718	-0.26123	-0.39726	0.32188	-1.2137	-0.45775	-0.59379	-1.53558	-0.77963	-0.91567	0.75595	0.61991	-0.13603
chr10	19691994	19692003	+	chr10	19691786	19693595	NA	NA	0.31459	0.20812	0.11631	0.19123	0.73327	0.27156	0.20016	0.43522	0.9573	0.51815	-1.01726	0.16044	0.47371	0.52208	0.08293	-1.45248	-0.27478	0.03849	-0.43916	-1.97456	-0.79686	-0.4836	-1.5354	-0.3577	-0.04444	1.1777	1.49097	0.31327
chr15	96757967	96757976	+	chr15	96757489	96758093	exon	Gm8888	0.17325	0.06789	0.08331	0.0874	0.43217	0.2069	0.13073	0.7223	0.59123	0.55838	-0.97668	-0.17094	0.24974	-0.13107	-0.16392	-1.69897	-0.89324	-0.47256	-0.03285	-1.56791	-0.76218	-0.34149	-1.53505	-0.72932	-0.30864	0.80573	1.22642	0.42069
chr2	71598642	71598651	+	chr2	71598377	71599215	transcript	Gm36857	0.1719	0.10872	0.06406	0.10644	0.48732	0.29741	0.19503	0.39097	0.74949	0.40727	-1.12771	-0.55736	-0.12023	0.35851	0.0163	-1.51869	-0.94834	-0.5112	-0.34222	-1.8772	-1.30685	-0.86971	-1.53498	-0.96463	-0.5275	0.57035	1.00749	0.43714
chr5	122343999	122344008	+	chr5	122343783	122344139	CDS	Rad9b	0.13259	0.03156	0.05674	0.08601	0.42799	0.11305	0.24962	0.85043	0.58722	0.3316	-1.20304	0.12995	-0.60019	-0.26321	-0.51883	-2.05347	-0.72047	-1.45062	-0.25563	-1.79026	-0.45727	-1.18741	-1.53463	-0.20164	-0.93178	1.33299	0.60285	-0.73014
chr6	113668786	113668795	+	chr6	113668473	113669199	transcript	Irak2	0.37222	0.37973	0.19198	0.25632	0.92128	0.60188	0.45411	-0.02304	0.70461	0.41208	-1.12238	-0.57757	-0.23334	0.72765	0.43512	-1.09933	-0.55453	-0.2103	-0.29253	-1.82699	-1.28218	-0.93795	-1.53446	-0.98965	-0.64542	0.5448	0.88904	0.34423
chr8	121570336	121570345	-	chr8	121570243	121570705	CDS	Fbxo31	0.24992	0.20078	0.08203	0.07655	0.4005	0.1389	0.25877	0.22226	0.96525	1.01081	-0.52358	0.56186	-0.03663	0.74299	0.78855	-0.74584	0.3396	-0.25889	0.04556	-1.48883	-0.40339	-1.00188	-1.53439	-0.44895	-1.04744	1.08544	0.48695	-0.59849
chr7	43544767	43544776	-	chr7	43544642	43544986	NA	NA	0.04282	0.04673	0.03558	0.0354	0.28121	0.12597	0.13031	-0.04058	0.07829	0.08029	-1.45375	-0.68403	-0.71219	0.11887	0.12087	-1.41317	-0.64345	-0.67161	0.002	-1.53204	-0.76232	-0.79048	-1.53404	-0.76432	-0.79248	0.76971	0.74156	-0.02816
chr2	14250288	14250297	+	chr2	14249859	14250501	CDS	Mrc1	0.04363	0.0627	0.06215	0.02977	0.26439	0.12504	0.06575	-0.18689	-0.18183	0.15284	-1.37912	-0.66943	-0.21466	0.00506	0.33973	-1.19223	-0.48253	-0.02777	0.33467	-1.1973	-0.4876	-0.03283	-1.53196	-0.82227	-0.3675	0.7097	1.16446	0.45477
chr5	138694625	138694634	+	chr5	138694060	138695124	NA	NA	0.18883	0.11328	0.07555	0.10406	0.47921	0.32344	0.24163	0.44789	0.73737	0.51345	-1.01848	-0.56122	-0.24674	0.28948	0.06556	-1.46637	-1.00911	-0.69463	-0.22392	-1.75586	-1.2986	-0.98411	-1.53194	-1.07468	-0.76019	0.45726	0.77175	0.31449
chr18	53264373	53264382	+	chr18	53264101	53264497	NA	NA	0.10669	0.15619	0.06491	0.0513	0.32663	0.13262	0.13055	-0.3177	0.33629	0.46525	-1.06664	-0.1751	-0.16188	0.65399	0.78295	-0.74894	0.1426	0.15582	0.12896	-1.40293	-0.51139	-0.49816	-1.53189	-0.64035	-0.62713	0.89154	0.90477	0.01322
chr13	112635330	112635339	-	chr13	112635237	112635798	CDS	Ddx4	0.1772	0.14655	0.12377	0.08835	0.43359	0.26194	0.31317	0.17285	0.31623	0.572	-0.95941	-0.39196	-0.58583	0.14337	0.39915	-1.13227	-0.56481	-0.75868	0.25577	-1.27564	-0.70819	-0.90206	-1.53141	-0.96396	-1.15783	0.56745	0.37358	-0.19387
chr2	119559079	119559088	-	chr2	119558931	119559508	NA	NA	0.08966	0.21624	0.05975	0.06393	0.3628	0.15265	0.09067	-0.75555	0.25607	0.21743	-1.31335	-0.42493	-0.0079	1.01162	0.97298	-0.55781	0.33062	0.74765	-0.03864	-1.56942	-0.681	-0.26397	-1.53078	-0.64236	-0.22533	0.88843	1.30545	0.41703
chr14	77904322	77904331	+	chr14	77904067	77904710	exon	Epsti1	0.22016	0.16718	0.1171	0.06988	0.37987	0.16114	0.1486	0.26622	0.57301	0.93781	-0.59261	0.29995	0.37258	0.30679	0.67159	-0.85883	0.03372	0.10636	0.3648	-1.16562	-0.27307	-0.20043	-1.53041	-0.63786	-0.56523	0.89255	0.96519	0.07264
chr15	96654949	96654958	-	chr15	96654736	96655110	NA	NA	0.50433	0.43732	0.26318	0.26438	0.94162	0.6071	0.77919	0.17128	0.74388	0.73905	-0.79123	-0.22859	-0.54516	0.5726	0.56776	-0.96251	-0.39987	-0.71645	-0.00484	-1.53511	-0.97247	-1.28905	-1.53027	-0.96764	-1.28421	0.56264	0.24606	-0.31657
chr1	180417273	180417282	-	chr1	180417145	180417427	CDS	Itpkb	0.08589	0.07214	0.09048	0.05087	0.32483	0.15116	0.13242	0.11455	-0.0363	0.31187	-1.21811	-0.44608	-0.33147	-0.15085	0.19732	-1.33266	-0.56063	-0.44602	0.34817	-1.18181	-0.40978	-0.29518	-1.52998	-0.75795	-0.64335	0.77203	0.88663	0.1146
chr5	74944304	74944313	+	chr5	74943858	74944460	transcript	Gm52779	0.92225	0.4779	0.3578	0.36484	1.23122	1.08018	0.74906	0.82914	1.16906	1.14676	-0.38289	-0.20835	0.26948	0.33991	0.31762	-1.21204	-1.0375	-0.55967	-0.02229	-1.55195	-1.37741	-0.89958	-1.52966	-1.35511	-0.87729	0.17454	0.65237	0.47783
chr9	15045508	15045517	+	chr9	15044421	15045746	transcript	Panx1	1.03774	0.44883	0.33414	0.2918	1.01952	1.04865	1.08223	1.05962	1.40186	1.552	0.02341	-0.01384	-0.05562	0.34224	0.49238	-1.03621	-1.07346	-1.11524	0.15014	-1.37845	-1.4157	-1.45748	-1.52859	-1.56584	-1.60762	-0.03725	-0.07903	-0.04178
chr7	98522845	98522854	+	chr7	98522554	98522943	NA	NA	0.05296	0.03184	0.07897	0.02509	0.25003	0.20652	0.14086	0.22342	-0.23473	0.3028	-1.22571	-1.03078	-0.67546	-0.45815	0.07938	-1.44913	-1.25421	-0.89888	0.53753	-0.99098	-0.79606	-0.44073	-1.5285	-1.33358	-0.97826	0.19492	0.55025	0.35532
chr17	70974212	70974221	+	chr17	70974129	70974482	stop_codon	Myl12b	0.15292	0.08732	0.07441	0.0879	0.43099	0.20434	0.14779	0.44498	0.55139	0.44038	-1.08747	-0.27266	0.03026	0.10641	-0.0046	-1.53245	-0.71764	-0.41472	-0.11101	-1.63886	-0.82405	-0.52113	-1.52785	-0.71304	-0.41012	0.81481	1.11773	0.30292
chr12	69538720	69538729	-	chr12	69538606	69538849	NA	NA	0.22806	0.20506	0.23149	0.13162	0.55695	0.33345	0.35075	0.10681	-0.01527	0.51296	-1.01465	-0.40815	-0.46536	-0.12208	0.40615	-1.12146	-0.51496	-0.57216	0.52823	-0.99938	-0.39288	-0.45008	-1.52761	-0.92111	-0.97831	0.6065	0.5493	-0.05721
chr11	72954034	72954043	+	chr11	72953777	72954215	transcript	Gm34793	0.1023	0.06667	0.05876	0.06074	0.35249	0.16251	0.13951	0.28855	0.36127	0.34272	-1.18454	-0.38552	-0.25013	0.07272	0.05417	-1.47309	-0.67408	-0.53868	-0.01855	-1.54581	-0.74679	-0.6114	-1.52726	-0.72825	-0.59285	0.79901	0.93441	0.13539
chrX	98989781	98989790	+	chrX	98989637	98989923	NA	NA	0.3703	0.33171	0.21345	0.13097	0.55489	0.37169	0.22106	0.12512	0.59431	1.0445	-0.4827	-0.00431	0.55906	0.46919	0.91938	-0.60781	-0.12943	0.43395	0.45019	-1.07701	-0.59862	-0.03525	-1.52719	-1.04881	-0.48544	0.47839	1.04176	0.56337
chr7	101363159	101363168	-	chr7	101362722	101363259	5UTR	Arap1	0.12774	0.16895	0.08086	0.07722	0.39996	0.26854	0.18296	-0.24566	0.34223	0.37254	-1.15463	-0.70864	-0.32048	0.5879	0.6182	-0.90896	-0.46298	-0.07482	0.03031	-1.49686	-1.05087	-0.66272	-1.52717	-1.08118	-0.69302	0.44599	0.83414	0.38816
chr9	45084791	45084800	-	chr9	45084455	45084916	exon	Jaml	0.05482	0.03843	0.04159	0.00386	0.18848	0.11311	0.04103	0.16804	0.13408	0.60352	-0.92344	-0.47615	0.14004	-0.03396	0.43548	-1.09147	-0.64419	-0.028	0.46944	-1.05752	-0.61023	0.00596	-1.52695	-1.07967	-0.46348	0.44729	1.06348	0.61619
chr8	31121164	31121173	-	chr8	31120664	31121324	CDS	Rnf122	0.08188	0.05245	0.0165	0.02649	0.25365	0.20049	0.19742	0.26377	0.66933	0.54474	-0.98203	-0.7428	-0.7277	0.40556	0.28097	-1.2458	-1.00657	-0.99147	-0.1246	-1.65137	-1.41214	-1.39703	-1.52677	-1.28754	-1.27243	0.23923	0.25434	0.01511
chr5	110421156	110421165	+	chr5	110421002	110421284	3UTR	Fbrsl1	0.07652	0.03235	0.0556	0.02423	0.24708	0.02363	0.08998	0.43178	0.18854	0.52741	-0.99911	0.53474	-0.10945	-0.24324	0.09563	-1.43089	0.10296	-0.54123	0.33888	-1.18765	0.3462	-0.29799	-1.52652	0.00732	-0.63686	1.53385	0.88966	-0.64419
chr2	168429772	168429781	+	chr2	168429630	168429945	transcript	Gm33359	0.10056	0.04116	0.01737	0.04572	0.30896	0.16432	0.09044	0.52473	0.80347	0.47695	-1.04946	-0.40849	0.07696	0.27874	-0.04778	-1.5742	-0.93322	-0.44777	-0.32652	-1.85294	-1.21196	-0.72651	-1.52641	-0.88544	-0.39999	0.64098	1.12643	0.48545
chr15	98772905	98772914	-	chr15	98772149	98773340	CDS	Wnt10b	0.44581	0.37858	0.29618	0.23219	0.84606	0.41486	0.57769	0.1918	0.46806	0.7263	-0.80002	0.08514	-0.31521	0.27626	0.5345	-0.99181	-0.10666	-0.50701	0.25825	-1.26807	-0.38291	-0.78327	-1.52632	-0.64116	-1.04151	0.88516	0.4848	-0.40036
chr13	55369830	55369839	-	chr13	55368895	55370553	exon	Rgs14	0.53302	0.40807	0.3443	0.32503	1.11309	0.53204	0.63398	0.32048	0.51635	0.58117	-0.94467	0.00226	-0.21531	0.19587	0.26069	-1.26515	-0.31822	-0.53579	0.06483	-1.46102	-0.51409	-0.73165	-1.52585	-0.57892	-0.79648	0.94693	0.72937	-0.21756
chr6	42693107	42693116	-	chr6	42692136	42693247	5UTR	Tcaf1	0.17376	0.14162	0.0797	0.12704	0.54296	0.24846	0.35371	0.18429	0.62361	0.27635	-1.24948	-0.3547	-0.74108	0.43932	0.09205	-1.43378	-0.539	-0.92538	-0.34727	-1.8731	-0.97832	-1.3647	-1.52583	-0.63105	-1.01743	0.89478	0.5084	-0.38638
chr18	56469464	56469473	-	chr18	56469045	56469605	CDS	Gramd3	0.0617	0.06303	0.01823	0.05127	0.32477	0.17762	0.07373	-0.01225	0.47142	0.09987	-1.42594	-0.80183	-0.10721	0.48367	0.11212	-1.41368	-0.78958	-0.09495	-0.37155	-1.89735	-1.27325	-0.57862	-1.5258	-0.9017	-0.20707	0.6241	1.31873	0.69463
chr18	34098880	34098889	-	chr18	34098702	34099001	exon	Gm24432	0.10685	0.14719	0.12004	0.10626	0.48285	0.22377	0.0972	-0.26375	-0.09165	0.00424	-1.52091	-0.6612	0.07095	0.1721	0.26799	-1.25716	-0.39745	0.3347	0.09589	-1.42926	-0.56955	0.1626	-1.52515	-0.66544	0.06671	0.8597	1.59185	0.73215
chr8	127540450	127540459	-	chr8	127540229	127540563	NA	NA	0.10172	0.10024	0.05401	0.0494	0.31913	0.14747	0.13264	0.01094	0.4025	0.44807	-1.07684	-0.3027	-0.21136	0.39157	0.43714	-1.08777	-0.31364	-0.2223	0.04557	-1.47934	-0.70521	-0.61386	-1.52491	-0.75078	-0.65944	0.77413	0.86548	0.09134
chr17	47295453	47295462	+	chr17	47295206	47295696	transcript	Trerf1	0.2712	0.18281	0.21381	0.1494	0.60676	0.34766	0.3808	0.39948	0.24646	0.58486	-0.93976	-0.27408	-0.37841	-0.15301	0.18539	-1.33924	-0.67355	-0.77788	0.3384	-1.18622	-0.52054	-0.62487	-1.52462	-0.85894	-0.96327	0.66568	0.56136	-0.10433
chr5	100872221	100872230	-	chr5	100871621	100872408	transcript	Gpat3	0.49526	0.1535	0.18053	0.19812	0.74685	0.40061	0.56009	1.25063	1.10124	1.01172	-0.51276	0.2525	-0.15052	-0.14939	-0.23891	-1.76339	-0.99814	-1.40116	-0.08952	-1.614	-0.84874	-1.25176	-1.52448	-0.75923	-1.16225	0.76526	0.36224	-0.40302
chr8	126628875	126628884	-	chr8	126628661	126628956	NA	NA	0.23907	0.14886	0.08139	0.09132	0.43959	0.24211	0.17609	0.4553	0.92429	0.84494	-0.6795	-0.0131	0.30213	0.46899	0.38965	-1.1348	-0.4684	-0.15317	-0.07934	-1.60379	-0.93738	-0.62215	-1.52444	-0.85804	-0.54281	0.6664	0.98163	0.31523
chr4	114685740	114685749	-	chr4	114685477	114685838	transcript	Gm12829	0.246	0.13014	0.11024	0.06021	0.35009	0.2294	0.27671	0.60059	0.73456	1.13936	-0.38507	0.07216	-0.12467	0.13398	0.53878	-0.98566	-0.52843	-0.72526	0.4048	-1.11963	-0.6624	-0.85923	-1.52443	-1.0672	-1.26403	0.45723	0.2604	-0.19683
chr7	110796714	110796723	+	chr7	110796410	110797018	CDS	Ampd3	0.13878	0.05616	0.09164	0.09244	0.44264	0.17585	0.21276	0.63162	0.32607	0.31987	-1.20411	-0.21298	-0.39777	-0.30555	-0.31174	-1.83573	-0.84459	-1.02939	-0.0062	-1.53018	-0.53904	-0.72384	-1.52398	-0.53285	-0.71764	0.99113	0.80634	-0.18479
chr11	75935976	75935985	-	chr11	75935676	75936239	5UTR	Rph3al	0.32256	0.25705	0.13619	0.19567	0.73914	0.53357	0.35459	0.24669	0.855	0.52374	-0.9996	-0.59096	-0.10681	0.60831	0.27705	-1.24629	-0.83765	-0.3535	-0.33126	-1.8546	-1.44596	-0.96181	-1.52334	-1.1147	-0.63055	0.40864	0.89279	0.48415
chr14	61518868	61518877	-	chr14	61518657	61519418	NA	NA	0.10632	0.07394	0.07679	0.11081	0.49488	0.21429	0.17586	0.25401	0.22977	-0.03194	-1.55448	-0.62135	-0.42944	-0.02424	-0.28595	-1.80849	-0.87537	-0.68346	-0.26171	-1.78425	-0.85112	-0.65921	-1.52254	-0.58941	-0.3975	0.93313	1.12504	0.19191
chr15	84321763	84321772	+	chr15	84321592	84322061	exon	Gm22890	0.1282	0.04976	0.03787	0.06501	0.36296	0.14901	0.10488	0.62731	0.75163	0.4821	-1.03938	-0.12902	0.15977	0.12432	-0.14521	-1.66669	-0.75633	-0.46754	-0.26954	-1.79101	-0.88065	-0.59186	-1.52147	-0.61112	-0.32233	0.91036	1.19915	0.28879
chr15	79408964	79408973	+	chr15	79408851	79409613	3UTR	Csnk1e	0.10043	0.16965	0.10391	0.05099	0.32262	0.14576	0.1516	-0.43889	-0.02556	0.42267	-1.09849	-0.30199	-0.33667	0.41333	0.86155	-0.65961	0.1369	0.10221	0.44823	-1.07293	-0.27643	-0.31111	-1.52116	-0.72466	-0.75934	0.7965	0.76182	-0.03468
chr9	110464148	110464157	-	chr9	110463945	110464611	NA	NA	0.2716	0.18383	0.08305	0.16166	0.64026	0.30609	0.17857	0.39575	1.04506	0.51562	-1.00553	-0.12997	0.4233	0.64931	0.11986	-1.40128	-0.52573	0.02755	-0.52944	-2.05059	-1.17503	-0.62176	-1.52115	-0.64559	-0.09231	0.87556	1.42883	0.55328
chr10	83198165	83198174	+	chr10	83197633	83198310	transcript	Chst11	0.46762	0.43463	0.4452	0.4118	1.3581	0.91083	0.53554	0.0873	0.05875	0.15096	-1.37008	-0.839	-0.16463	-0.02855	0.06366	-1.45738	-0.9263	-0.25193	0.09221	-1.42883	-0.89775	-0.22338	-1.52104	-0.98996	-0.31559	0.53108	1.20545	0.67437
chr9	75037676	75037685	+	chr9	75037377	75038480	CDS	Arpp19	1.2592	1.03044	1.27064	0.67022	2.09955	1.06285	1.20627	0.26711	-0.01214	0.82411	-0.69679	0.22613	0.05755	-0.27926	0.557	-0.9639	-0.04099	-0.20956	0.83625	-0.68465	0.23827	0.0697	-1.5209	-0.59798	-0.76656	0.92292	0.75434	-0.16858
chr2	165234748	165234757	+	chr2	165234380	165234964	5UTR	Cdh22	0.32303	0.18225	0.20084	0.16389	0.64638	0.37358	0.28848	0.59374	0.49986	0.69286	-0.82774	-0.16497	0.12469	-0.09388	0.09913	-1.42147	-0.7587	-0.46905	0.193	-1.3276	-0.66483	-0.37517	-1.5206	-0.85783	-0.56817	0.66277	0.95243	0.28966
chr6	40430401	40430410	-	chr6	40430305	40430542	CDS	Dennd11	0.10969	0.05254	0.05609	0.06073	0.35033	0.15291	0.15438	0.47439	0.43992	0.39606	-1.1243	-0.2773	-0.28586	-0.03448	-0.07833	-1.59869	-0.75169	-0.76025	-0.04385	-1.56421	-0.71722	-0.72577	-1.52036	-0.67336	-0.68192	0.847	0.83844	-0.00856
chr3	9154357	9154366	-	chr3	9153650	9154722	exon	Gm41996	0.22906	0.10303	0.07522	0.09806	0.45737	0.18166	0.18311	0.71267	0.93189	0.74948	-0.77076	0.22872	0.22116	0.21921	0.03681	-1.48343	-0.48395	-0.49152	-0.1824	-1.70264	-0.70317	-0.71073	-1.52024	-0.52076	-0.52833	0.99948	0.99192	-0.00756
chr13	97857993	97858002	-	chr13	97857329	97858259	exon	Gm34388	0.27695	0.24809	0.19376	0.12201	0.52604	0.31078	0.24358	0.11677	0.36608	0.77943	-0.74075	-0.12583	0.1359	0.24931	0.66266	-0.85751	-0.2426	0.01913	0.41335	-1.10682	-0.49191	-0.23018	-1.52018	-0.90526	-0.64353	0.61491	0.87665	0.26173
[truncated: 13,379 more rows]

## Sheet: README
Supplemental Table 4: TOBIAS Footprint Scores for ETS motifs across all ATAC-seq peaks with differential accessibility between days 0-35 post-PHZ.
