# Supplementary material for: Regeneration alters open chromatin andcis-regulatory landscape of erythroid precursors
Source: HighWire-hosted journal article supplement (doi:10.1101/gr.279949.124), 2025-06-02
Supplement: Supplemental_Table_S5.xlsx [file Supplemental_Table_S5.xlsx]

## Sheet: README
Supplemental Table 5: Analysis of Transient (acute) vs. Durable (long) changes to chromatin accessibility over a 35 day time course of acute anemia.

## Sheet: long_peak_meme
MOTIF_INDEX	MOTIF_SOURCE	MOTIF_ID	ALT_ID	CONSENSUS	WIDTH	SITES	E-VALUE	E-VALUE_SOURCE	MOST_SIMILAR_MOTIF_SOURCE	MOST_SIMILAR_MOTIF	URL
1	MEME	RCCASHAGRKGGCRS	MEME-1	RCCASHAGRKGGCRS	15	215	1.5e-317	MEME	db/motif_databases/JASPAR/JASPAR2022_CORE_vertebrates_non-redundant_v2.meme	MA1929.1 (CTCF)	http://jaspar2022.genereg.net/matrix/MA1929.1
2	MEME	GTGTGTGTGTGTGTG	MEME-2	GTGTGTGTGTGTGTG	15	17	2.9e-30	MEME	db/motif_databases/JASPAR/JASPAR2022_CORE_vertebrates_non-redundant_v2.meme	MA1107.2 (KLF9)	http://jaspar2022.genereg.net/matrix/MA1107.2
3	MEME	CTRGRRCTGRAGTTA	MEME-4	CTRGRRCTGRAGTTA	15	36	1.2e-10	MEME
4	MEME	GGGAGAVAGASAGAG	MEME-6	GGGAGAVAGASAGAG	15	20	3.6e-08	MEME	db/motif_databases/JASPAR/JASPAR2022_CORE_vertebrates_non-redundant_v2.meme	MA1652.1 (ZKSCAN5)	http://jaspar2022.genereg.net/matrix/MA1652.1
5	MEME	GTGAGCYACCATGTG	MEME-7	GTGAGCYACCATGTG	15	20	3.5e-06	MEME
6	MEME	BCTTATCT	MEME-3	BCTTATCT	8	224	8.1e-06	MEME	db/motif_databases/EUKARYOTE/jolma2013.meme	GATA3_full	http://floresta.eead.csic.es/footprintdb/index.php?db=HumanTF:1.0&motif=GATA3_full
7	STREME	1-CCAGHAGAGGGCRS	STREME-1	CCAGHAGAGGGCRS	14	170	0.00036	STREME	db/motif_databases/JASPAR/JASPAR2022_CORE_vertebrates_non-redundant_v2.meme	MA1929.1 (CTCF)	http://jaspar2022.genereg.net/matrix/MA1929.1
8	MEME	TGWRTGCAGTDCCYA	MEME-8	TGWRTGCAGTDCCYA	15	23	0.00088	MEME
# MEME-ChIP (Motif Analysis of Large Nucleotide Datasets): Version 5.5.7 released on Wed Jun 19 13:59:04 2024 -0700
# The format of this file is described at https://meme-suite.org/meme//doc/meme-chip-output-format.html
# meme-chip -oc . -time 240 -ccut 100 -fdesc description -dna -order 2 -minw 6 -maxw 15 -db db/motif_databases/MOUSE/uniprobe_mouse.meme -db db/motif_databases/JASPAR/JASPAR2022_CORE_vertebrates_non-redundant_v2.meme -db db/motif_databases/EUKARYOTE/jolma2013.meme -meme-mod zoops -meme-nmotifs 10 -meme-searchsize 100000 -streme-pvt 0.05 -streme-align center -streme-totallength 4000000 -centrimo-s…

## Sheet: acute_peak_meme
MOTIF_INDEX	MOTIF_SOURCE	MOTIF_ID	ALT_ID	CONSENSUS	WIDTH	SITES	E-VALUE	E-VALUE_SOURCE	MOST_SIMILAR_MOTIF_SOURCE	MOST_SIMILAR_MOTIF	URL
1	MEME	WGATAARV	MEME-1	WGATAARV	8	1490	4.5e-53	MEME	db/motif_databases/JASPAR/JASPAR2022_CORE_vertebrates_non-redundant_v2.meme	MA0036.3 (GATA2)	http://jaspar2022.genereg.net/matrix/MA0036.3
2	MEME	YGCCCYCTDSTGGCC	MEME-2	YGCCCYCTDSTGGCC	15	422	6.3e-43	MEME	db/motif_databases/JASPAR/JASPAR2022_CORE_vertebrates_non-redundant_v2.meme	MA1929.1 (CTCF)	http://jaspar2022.genereg.net/matrix/MA1929.1
3	MEME	GGGWGGRG	MEME-5	GGGWGGRG	8	1119	1.6e-21	MEME	db/motif_databases/JASPAR/JASPAR2022_CORE_vertebrates_non-redundant_v2.meme	MA0039.4 (KLF4)	http://jaspar2022.genereg.net/matrix/MA0039.4
4	STREME	1-CCAGMAGAGGGCRCY	STREME-1	CCAGMAGAGGGCRCY	15	516	2.4e-13	STREME	db/motif_databases/JASPAR/JASPAR2022_CORE_vertebrates_non-redundant_v2.meme	MA0139.1 (CTCF)	http://jaspar2022.genereg.net/matrix/MA0139.1
5	MEME	CACACACACACACAC	MEME-3	CACACACACACACAC	15	115	2.4e-11	MEME	db/motif_databases/JASPAR/JASPAR2022_CORE_vertebrates_non-redundant_v2.meme	MA1107.2 (KLF9)	http://jaspar2022.genereg.net/matrix/MA1107.2
6	STREME	2-NAGATAAGVM	STREME-2	NAGATAAGVM	10	1860	1.3e-08	STREME	db/motif_databases/JASPAR/JASPAR2022_CORE_vertebrates_non-redundant_v2.meme	MA0036.3 (GATA2)	http://jaspar2022.genereg.net/matrix/MA0036.3
7	STREME	3-RCCCCRCCC	STREME-3	RCCCCRCCC	9	546	0.0037	STREME	db/motif_databases/EUKARYOTE/jolma2013.meme	SP1_DBD	http://floresta.eead.csic.es/footprintdb/index.php?db=HumanTF:1.0&motif=SP1_DBD
8	MEME	CTGCTG	MEME-6	CTGCTG	6	996	0.0076	MEME	db/motif_databases/JASPAR/JASPAR2022_CORE_vertebrates_non-redundant_v2.meme	MA1628.1 (Zic1::Zic2)	http://jaspar2022.genereg.net/matrix/MA1628.1
9	STREME	4-AGGAART	STREME-4	AGGAART	7	835	0.024	STREME	db/motif_databases/JASPAR/JASPAR2022_CORE_vertebrates_non-redundant_v2.meme	MA1508.1 (IKZF1)	http://jaspar2022.genereg.net/matrix/MA1508.1
10	MEME	GSGGCGGSGSSGSSG	MEME-4	GSGGCGGSGSSGSSG	15	254	0.036	MEME	db/motif_databases/JASPAR/JASPAR2022_CORE_vertebrates_non-redundant_v2.meme	MA1522.1 (MAZ)	http://jaspar2022.genereg.net/matrix/MA1522.1
# MEME-ChIP (Motif Analysis of Large Nucleotide Datasets): Version 5.5.7 released on Wed Jun 19 13:59:04 2024 -0700
# The format of this file is described at https://meme-suite.org/meme//doc/meme-chip-output-format.html
# meme-chip -oc . -time 240 -ccut 100 -fdesc description -dna -order 2 -minw 6 -maxw 15 -db db/motif_databases/MOUSE/uniprobe_mouse.meme -db db/motif_databases/JASPAR/JASPAR2022_CORE_vertebrates_non-redundant_v2.meme -db db/motif_databases/EUKARYOTE/jolma2013.meme -meme-mod zoops -meme-nmotifs 10 -meme-searchsize 100000 -streme-pvt 0.05 -streme-align center -streme-totallength 4000000 -centrimo-s…

## Sheet: long_peakswScore
chr	start	end	Day0vsDay7_M_value	Day0vsDay7_A_value	Day0vsDay7_p_value	normalized_read_density_Day_0	normalized_read_density_Day7	Day0vsDay35_M_value	Day0vsDay35_A_value	Day0vsDay35_p_value	normalized_read_density_Day_0	normalized_read_density_Day35
chrX	169986624	169987290	-1.05793	6.58206	6.84813e-08	66.3994	138.239	-1.62347	6.79483	1.19488e-17	63.2542	194.896
chr9	8823656	8824406	-1.67395	5.52933	1.06459e-08	25.8547	82.4994	-1.62535	5.47236	2.77963e-08	25.2758	77.9798
chr2	118962968	118964206	-1.88485	5.89721	2.7382e-13	31.0126	114.534	-1.02433	5.41645	0.000202793	29.9458	60.9101
chr11	58947552	58948406	-1.21809	5.4993	1.62195e-05	29.656	68.9911	-1.04526	5.38078	0.000181251	29.0033	59.8552
chr17	53554697	53555691	-1.89085	5.52662	1.04886e-10	23.9375	88.773	-1.22478	5.15814	5.70776e-05	23.3565	54.5887
chr1	185469347	185470077	-2.20516	5.86311	5.60229e-17	27.1058	124.992	-1.05977	5.23989	0.000234128	26.173	54.5601
chr9	8831499	8832584	-1.68966	5.29483	6.1094e-08	21.8566	70.5051	-1.289	5.06914	5.74258e-05	21.4758	52.4778
chr13	98743770	98744355	-1.95252	5.49718	4.45535e-11	22.9579	88.8583	-1.22703	5.09984	9.65797e-05	22.4139	52.4675
chr13	59739397	59739945	-1.2177	5.345	3.89148e-05	26.6516	61.985	-1.00259	5.21103	0.000575935	26.1681	52.4302
chr5	145138838	145139191	-1.18857	5.15814	0.000130803	23.6515	53.9079	-1.10803	5.09922	0.000300975	23.3477	50.3261
chr16	64817183	64817820	-1.67218	5.21836	2.44885e-07	20.8542	66.4614	-1.16701	4.94285	0.000439537	20.5254	46.0891
chr5	52712533	52713191	-2.30541	5.32866	3.57603e-13	18.0754	89.3481	-1.34684	4.82012	0.000140334	17.7126	45.0527
chr13	91473608	91473862	-1.29107	4.8741	0.000166988	18.7467	45.8748	-1.27215	4.85712	0.000236353	18.6493	45.042
chr9	35110037	35110494	-1.39694	5.00351	3.30395e-05	19.7673	52.0557	-1.20111	4.89232	0.000384073	19.5861	45.0319
chr10	43710341	43710909	-1.04726	5.0222	0.000758776	22.6049	46.7154	-1.00669	4.98864	0.000919032	22.3979	45.0041
chr1	181035394	181035984	-1.31599	4.72766	0.000240701	16.7916	41.8066	-1.31963	4.72766	0.000240701	16.7704	41.8594
chr2	151499546	151500981	-1.55234	5.01118	5.66925e-06	18.8307	55.229	-1.16622	4.80367	0.00064398	18.6429	41.839
chr1	132988559	132988838	-1.29229	4.62869	0.000412854	15.8076	38.7155	-1.28844	4.62869	0.000412854	15.8287	38.6639
chr13	98743110	98743602	-2.30374	5.24593	1.57693e-12	17.0779	84.3196	-1.20522	4.66993	0.000679994	16.7643	38.6537
chr11	116543171	116543498	-1.33492	4.35712	0.000723093	12.9032	32.55	-1.53087	4.46832	0.000105751	13.0221	37.6285
chr11	102365057	102365423	-1.76338	4.96241	6.07419e-07	16.9207	57.4445	-1.16495	4.6496	0.000947135	16.7621	37.5849
chr7	49283596	49284401	-1.12736	4.62869	0.00130877	16.7375	36.5646	-1.16495	4.6496	0.000947135	16.7621	37.5849
chr2	163687455	163687743	-1.04679	4.74593	0.00164332	18.6685	38.5677	-1.01155	4.72561	0.00220998	18.6336	37.5666
chr9	43224818	43225468	-1.4423	4.95345	2.68866e-05	18.7953	51.0767	-1.01155	4.72561	0.00220998	18.6336	37.5666
chr13	102325742	102326466	-1.16194	4.72869	0.000780577	17.7251	39.6613	-1.04479	4.6677	0.00199951	17.6953	36.5068
chr18	77668539	77669293	-1.70693	5.01464	8.29093e-07	17.8912	58.4087	-1.04479	4.6677	0.00199951	17.6953	36.5068
chr8	60952933	60953117	-1.49083	4.90126	2.15761e-05	17.8251	50.0978	-1.04479	4.6677	0.00199951	17.6953	36.5068
chr10	128510470	128511564	-2.03879	4.83089	3.16393e-08	14.0402	57.6915	-1.34631	4.47564	0.000599741	13.9529	35.4766
chr1	194675584	194676224	-1.38474	4.76374	0.000116406	16.8114	43.8988	-1.08085	4.60716	0.00243645	16.7575	35.4468
chr1	89484284	89485107	-1.1986	4.74793	0.000561635	17.7362	40.7077	-1.00212	4.64616	0.003587	17.6929	35.4379
chr14	53804025	53804637	1.15976	5.7608	5.53983e-06	81.0466	36.2754	1.16205	5.71836	6.62403e-06	78.7596	35.1957
chrX	19246640	19247577	-1.90945	4.54638	2.45389e-06	12.0558	45.2895	-1.51068	4.35022	0.000276477	12.0828	34.4292
chr11	85769519	85770603	-1.82985	4.61681	3.51054e-06	13.013	46.2614	-1.40278	4.40368	0.000499785	13.0167	34.4174
chr2	129243021	129243612	-1.45022	4.79809	5.49135e-05	16.8302	45.9886	-1.03686	4.58496	0.00327984	16.7551	34.3775
chr2	118948363	118949358	-2.22926	4.71418	7.46667e-09	12.122	56.8391	-1.4653	4.32732	0.000408704	12.081	33.3581
chr6	115501044	115501607	-1.24007	4.30735	0.00207915	12.8823	30.4293	-1.3574	4.38078	0.000723093	13.0148	33.3467
chr7	49319960	49320380	-1.87129	4.27345	1.83962e-05	10.1106	36.9908	-1.66166	4.18316	0.000167284	10.213	32.3118
chr1	160227116	160227550	-1.18409	4.38244	0.00237138	13.8363	31.439	-1.21007	4.40689	0.00170443	13.9467	32.2657
chr17	12759567	12760340	-1.52872	4.66096	5.16126e-05	14.8934	42.9719	-1.1161	4.45345	0.00267028	14.8809	32.256
chr6	91132739	91133336	-1.65975	4.72972	1.00888e-05	14.9269	47.1632	-1.1161	4.45345	0.00267028	14.8809	32.256
chr8	109591414	109591783	-1.49391	4.6427	7.6529e-05	14.8846	41.9226	-1.1161	4.45345	0.00267028	14.8809	32.256
chr11	98155079	98155738	-1.99457	4.99718	1.11497e-08	15.9988	63.7549	-1.02783	4.49718	0.00400542	15.8154	32.247
chr2	164466636	164467319	-1.50422	4.73989	4.39758e-05	15.8651	45.0045	-1.02783	4.49718	0.00400542	15.8154	32.247
chr7	45190245	45190587	-1.04163	4.49718	0.00400542	15.74	32.4016	-1.02783	4.49718	0.00400542	15.8154	32.247
chr2	29627983	29628302	-1.87129	4.27345	1.83962e-05	10.1106	36.9908	-1.6132	4.15871	0.000254908	10.2114	31.2397
chr5	77091859	77092346	-2.26476	4.845	1.01064e-09	13.1102	63.0042	-1.26207	4.33267	0.00147553	13.0108	31.2049
chr17	71510121	71510798	-1.34514	4.56464	0.000346964	14.8467	37.7188	-1.06765	4.42899	0.00363612	14.8786	31.1857
chr5	17969719	17970750	-1.22194	4.5	0.000999569	14.8155	34.5585	-1.06765	4.42899	0.00363612	14.8786	31.1857
chr9	63373363	63373722	-1.34514	4.56464	0.000346964	14.8467	37.7188	-1.06765	4.42899	0.00363612	14.8786	31.1857
chr7	16493296	16493699	-1.13813	3.58496	0.0116399	8.08863	17.8028	-1.85522	3.98864	8.89549e-05	8.34568	30.1953
chr10	4070988	4071557	-2.27006	4.61441	1.21304e-08	11.1531	53.7965	-1.43635	4.19616	0.000718378	11.1424	30.1552
chr2	180346808	180347506	-1.07742	3.98864	0.00832654	10.9278	23.0605	-1.43635	4.19616	0.000718378	11.1424	30.1552
chr3	104681144	104681800	-1.14138	4.0222	0.00607144	10.9398	24.1322	-1.43635	4.19616	0.000718378	11.1424	30.1552
chr3	135351775	135352435	-2.15543	4.55426	9.06597e-08	11.1313	49.59	-1.43635	4.19616	0.000718378	11.1424	30.1552
chr4	121001134	121001349	-1.08426	4.22561	0.00547208	12.848	27.2416	-1.21191	4.30735	0.00207915	13.0087	30.1338
chr17	28237898	28238313	-1.18409	4.38244	0.00237138	13.8363	31.439	-1.11146	4.35712	0.00326724	13.9423	30.1242
chr1	194839312	194839873	-1.0866	4.42899	0.00363612	14.7812	31.3913	-1.01749	4.40368	0.00490086	14.8762	30.1152
chr4	150247754	150248382	-1.03836	4.40368	0.00490086	14.769	30.3339	-1.01749	4.40368	0.00490086	14.8762	30.1152
chr5	31528619	31528938	-1.13321	4.45345	0.00267028	14.793	32.4478	-1.01749	4.40368	0.00490086	14.8762	30.1152
chr2	168049921	168050850	1.63534	5.14616	6.41972e-07	62.4155	20.0912	1.04577	5.42587	0.000150459	61.7668	29.919
chr6	50254626	50255845	1.3954	5.29483	3.80637e-06	63.6692	24.2032	1.06767	5.43672	0.000111053	62.7071	29.9169
chr19	5195365	5196113	-1.14009	4.1427	0.00492487	11.8981	26.2227	-1.26783	4.22766	0.00179595	12.0733	29.0724
chr5	106928019	106928432	-1.92257	4.66546	9.00786e-07	13.0337	49.4105	-1.15993	4.28112	0.00290114	13.0065	29.0624
chr9	71963897	71964813	-1.46595	4.42587	0.000233233	12.9322	35.7247	-1.15993	4.28112	0.00290114	13.0065	29.0624
chr16	58676633	58677115	-1.78814	4.69937	3.15275e-06	13.9801	48.2829	-1.05947	4.33089	0.00445533	13.9399	29.0532
chr17	74810883	74811228	-1.2307	4.40689	0.00170443	13.8474	32.4971	-1.05947	4.33089	0.00445533	13.9399	29.0532
chr15	96566804	96567249	-1.01034	3.95345	0.0112653	10.9153	21.9876	-1.33043	4.1427	0.00152436	11.1385	28.0109
chr6	37434062	37434700	-2.03036	4.48864	1.03322e-06	11.1075	45.3749	-1.33043	4.1427	0.00152436	11.1385	28.0109
chr6	85331447	85331747	-1.47293	4.19616	0.000486643	11.002	30.5399	-1.33043	4.1427	0.00152436	11.1385	28.0109
chr8	95223393	95224325	-1.08158	4.112	0.00673929	11.8862	25.1553	-1.21388	4.20044	0.00254061	12.0712	28.0005
chr11	85255537	85256185	-1.36173	4.47564	0.000416487	13.8785	35.6668	-1.00553	4.30367	0.00600951	13.9375	27.982
chr15	35475203	35475909	-1.51903	4.55817	9.00772e-05	13.9159	39.8825	-1.00553	4.30367	0.00600951	13.9375	27.982
chr15	62042914	62043451	-2.29369	4.96463	1.36732e-10	14.1016	69.1411	-1.00553	4.30367	0.00600951	13.9375	27.982
chr16	21518778	21519198	-1.40278	4.49718	0.000287038	13.8882	36.7218	-1.00553	4.30367	0.00600951	13.9375	27.982
chr5	65288204	65288961	-1.51903	4.55817	9.00772e-05	13.9159	39.8825	-1.00553	4.30367	0.00600951	13.9375	27.982
chrX	98908603	98909452	-1.87686	4.74593	8.26603e-07	14.0014	51.4236	-1.00553	4.30367	0.00600951	13.9375	27.982
chr14	54375924	54376258	-1.06232	3.7047	0.0128651	9.02254	18.8417	-1.53983	3.98289	0.000684983	9.27263	26.9611
chr8	111851371	111851692	-1.87129	4.27345	1.83962e-05	10.1106	36.9908	-1.40105	4.05164	0.00126722	10.2044	26.9492
chr1	170619553	170620410	-1.84237	4.51118	6.0886e-06	12.0419	43.1824	-1.15782	4.17215	0.00355685	12.069	26.9284
chr12	3253656	3254064	-1.14009	4.1427	0.00492487	11.8981	26.2227	-1.15782	4.17215	0.00355685	12.069	26.9284
chr14	65026010	65026705	-1.08158	4.112	0.00673929	11.8862	25.1553	-1.15782	4.17215	0.00355685	12.069	26.9284
chr12	21191563	21192078	-1.54685	4.46832	0.000105751	12.9501	37.8374	-1.04992	4.22561	0.00547208	13.0019	26.9192
chr13	21743851	21744349	-1.33492	4.35712	0.000723093	12.9032	32.55	-1.04992	4.22561	0.00547208	13.0019	26.9192
chr5	107934852	107935512	-1.69562	4.54638	2.01392e-05	12.9832	42.0545	-1.04992	4.22561	0.00547208	13.0019	26.9192
chr5	123124530	123124772	-1.54685	4.46832	0.000105751	12.9501	37.8374	-1.04992	4.22561	0.00547208	13.0019	26.9192
chr6	67049307	67049914	-1.7975	4.59984	5.47406e-06	13.0058	45.2106	-1.04992	4.22561	0.00547208	13.0019	26.9192
chr9	75407891	75408107	-1.33492	4.35712	0.000723093	12.9032	32.55	-1.04992	4.22561	0.00547208	13.0019	26.9192
chr18	6715540	6716288	-1.04941	3.53841	0.0161167	8.07636	16.7155	-1.63488	3.87744	0.000528415	8.33974	25.9001
chr2	146612790	146613376	-1.53641	3.95345	0.00102747	9.09604	26.3851	-1.48148	3.95345	0.00102747	9.27089	25.8875
chr15	74729288	74729620	-1.44856	4.05164	0.00126722	10.0378	27.3966	-1.3427	4.0222	0.00184945	10.2025	25.8761
chr3	96327887	96328827	-1.14178	3.89068	0.00751021	9.98518	22.0326	-1.3427	4.0222	0.00184945	10.2025	25.8761
chr5	146691790	146693288	-1.83025	4.25191	2.89642e-05	10.1035	35.928	-1.3427	4.0222	0.00184945	10.2025	25.8761
chr1	153035525	153035958	-1.20249	4.05426	0.00437143	10.9512	25.2027	-1.21601	4.08496	0.00311044	11.1344	25.8657
chr11	98717791	98718388	-1.01034	3.95345	0.0112653	10.9153	21.9876	-1.21601	4.08496	0.00311044	11.1344	25.8657
chr15	64230993	64231869	-1.261	4.08496	0.00311044	10.9622	26.2721	-1.21601	4.08496	0.00311044	11.1344	25.8657
chr14	22061993	22062778	-1.19621	4.17215	0.00355685	11.9095	27.2891	-1.09947	4.1427	0.00492487	12.0668	25.8562
chr16	92661498	92662354	-1.08158	4.112	0.00673929	11.8862	25.1553	-1.09947	4.1427	0.00492487	12.0668	25.8562
chr5	34865233	34865817	-2.06409	4.62751	1.44656e-07	12.0877	50.5471	-1.09947	4.1427	0.00492487	12.0668	25.8562
chr9	23433205	23433811	1.32838	5.13748	2.34426e-05	55.7799	22.2123	1.10287	5.2338	0.000234128	55.148	25.6763
chr2	73834376	73834976	-2.81044	4.46241	3.892e-11	8.32348	58.389	-1.57405	3.84674	0.000808164	8.33811	24.8258
chr3	127879973	127880505	-1.8575	3.96241	8.89549e-05	8.18883	29.6746	-1.57405	3.84674	0.000808164	8.33811	24.8258
chr17	24573792	24573945	-1.59253	3.98289	0.000684983	9.10478	27.4581	-1.42064	3.92275	0.00152653	9.26907	24.8137
chr1	165328212	165328755	-1.55437	4.10716	0.000385471	10.0559	29.5348	-1.28187	3.9915	0.00267143	10.2005	24.8028
chr13	112861873	112862639	-1.42293	4.16993	0.00105129	10.9926	29.4744	-1.15518	4.05426	0.00437143	11.1322	24.7929
chr17	12733158	12733781	-1.07742	3.98864	0.00832654	10.9278	23.0605	-1.15518	4.05426	0.00437143	11.1322	24.7929
chr2	101665155	101665731	-1.07742	3.98864	0.00832654	10.9278	23.0605	-1.15518	4.05426	0.00437143	11.1322	24.7929
chr9	56973811	56974387	-1.37104	4.1427	0.00152436	10.9828	28.4079	-1.15518	4.05426	0.00437143	11.1322	24.7929
chr1	134048803	134049095	-1.02047	4.07994	0.00910715	11.8737	24.0868	-1.03864	4.112	0.00673929	12.0644	24.7837
chr11	72458443	72459000	-1.08158	4.112	0.00673929	11.8862	25.1553	-1.03864	4.112	0.00673929	12.0644	24.7837
chr17	7983501	7984368	-1.08158	4.112	0.00673929	11.8862	25.1553	-1.03864	4.112	0.00673929	12.0644	24.7837
chr2	32433209	32433711	-1.5356	4.35022	0.000185634	11.9789	34.7278	-1.03864	4.112	0.00673929	12.0644	24.7837
chr8	117109635	117110236	-1.14009	4.1427	0.00492487	11.8981	26.2227	-1.03864	4.112	0.00673929	12.0644	24.7837
chr19	3681198	3682120	1.12449	5.16546	0.000181112	52.9919	24.3056	1.08772	5.16546	0.000383957	52.321	24.6173
chr2	13558519	13559125	-1.00263	3.13339	0.035408	6.19917	12.421	-1.87643	3.63339	0.000276498	6.47635	23.7788
chr4	117058590	117058867	-1.89162	3.59984	0.000442397	6.29421	23.3548	-1.87643	3.63339	0.000276498	6.47635	23.7788
chr1	182990933	182991449	-1.3994	3.54373	0.00490099	7.18023	18.9409	-1.682	3.72972	0.000612246	7.4061	23.7642
chr16	32896205	32896948	-2.03542	3.87744	3.74547e-05	7.25882	29.7569	-1.682	3.72972	0.000612246	7.4061	23.7642
chr11	51837133	51837437	-1.79658	4.08995	7.96589e-05	9.13664	31.7403	-1.3571	3.89068	0.0022449	9.26717	23.7397
chr15	99055572	99056688	-1.06232	3.7047	0.0128651	9.02254	18.8417	-1.3571	3.89068	0.0022449	9.26717	23.7397
chr5	100553304	100553726	-1.53641	3.95345	0.00102747	9.09604	26.3851	-1.3571	3.89068	0.0022449	9.26717	23.7397
chr17	55710586	55710897	-1.7443	4.20681	7.05216e-05	10.0887	33.8002	-1.21833	3.95943	0.00381633	10.1984	23.7293
chr3	88834428	88834675	-1.39244	4.0222	0.00184945	10.0281	26.326	-1.21833	3.95943	0.00381633	10.1984	23.7293
chr4	88270414	88271035	-1.44856	4.05164	0.00126722	10.0378	27.3966	-1.21833	3.95943	0.00381633	10.1984	23.7293
chr1	85839483	85840196	-1.20249	4.05426	0.00437143	10.9512	25.2027	-1.09164	4.0222	0.00607144	11.13	23.7198
chr10	128396024	128396536	-1.42293	4.16993	0.00105129	10.9926	29.4744	-1.09164	4.0222	0.00607144	11.13	23.7198
chr11	84725166	84725712	-1.8561	4.39721	1.05751e-05	11.0744	40.0925	-1.09164	4.0222	0.00607144	11.13	23.7198
chr12	110419928	110420360	-1.37104	4.1427	0.00152436	10.9828	28.4079	-1.09164	4.0222	0.00607144	11.13	23.7198
chr7	97071100	97072274	-1.77971	4.35712	2.58779e-05	11.0599	37.9749	-1.09164	4.0222	0.00607144	11.13	23.7198
chr12	90737795	90738438	1.30398	4.98792	6.85608e-05	49.8635	20.1951	1.07109	5.09368	0.00062703	49.4954	23.5578
chr13	13437891	13439303	1.16638	5.06012	0.000189655	49.9811	22.2684	1.07109	5.09368	0.00062703	49.4954	23.5578
chr16	31549962	31550332	-2.18524	3.7539	2.36201e-05	6.32592	28.7705	-1.80993	3.59984	0.000442397	6.47496	22.7029
chr19	20591889	20592567	-1.82454	3.56464	0.000701733	6.28699	22.2682	-1.80993	3.59984	0.000442397	6.47496	22.7029
chr19	42566771	42567297	-1.82454	3.56464	0.000701733	6.28699	22.2682	-1.80993	3.59984	0.000442397	6.47496	22.7029
chr2	126867544	126868169	-2.01669	3.66546	0.000105495	6.3077	25.5244	-1.80993	3.59984	0.000442397	6.47496	22.7029
chr13	74017403	74017895	-1.98353	3.85022	6.07374e-05	7.25237	28.6803	-1.61551	3.69616	0.000947993	7.40451	22.6889
chr15	4042987	4043461	-1.68991	3.69616	0.000947993	7.21602	23.2815	-1.61551	3.69616	0.000947993	7.40451	22.6889
chr4	57927875	57928306	-1.31605	3.5	0.00716299	7.17	17.8522	-1.61551	3.69616	0.000947993	7.40451	22.6889
chr8	14880011	14880518	-1.55232	3.62396	0.00220545	7.19905	21.1139	-1.61551	3.69616	0.000947993	7.40451	22.6889
chr18	84414299	84415065	-1.8575	3.96241	8.89549e-05	8.18883	29.6746	-1.44401	3.78112	0.00183674	8.33461	22.6765
chr2	144382647	144383075	-2.04743	4.06206	1.34185e-05	8.21549	33.9602	-1.44401	3.78112	0.00183674	8.33461	22.6765
chr3	146376673	146377313	-1.64646	4.01118	0.000296516	9.11319	28.5301	-1.29061	3.85712	0.00326531	9.26518	22.6655
chr11	105269832	105270482	-1.50248	4.07994	0.000859898	10.047	28.4662	-1.15184	3.92587	0.00538776	10.1962	22.6556
chr10	83027582	83028074	-1.14138	4.0222	0.00607144	10.9398	24.1322	-1.02515	3.98864	0.00832654	11.1276	22.6465
chr5	88370506	88371415	-1.81844	4.37744	1.65884e-05	11.0673	39.0341	-1.02515	3.98864	0.00832654	11.1276	22.6465
chr8	71639244	71639758	-1.61286	4.26958	0.000144249	11.0284	33.7311	-1.02515	3.98864	0.00832654	11.1276	22.6465
chrX	13504359	13504934	-1.261	4.08496	0.00311044	10.9622	26.2721	-1.02515	3.98864	0.00832654	11.1276	22.6465
chr10	19672030	19672756	1.04784	5.00351	0.000679285	46.1237	22.3096	1.02333	5.00351	0.000679285	45.7335	22.4999
chr2	31459012	31459433	1.10827	5.03237	0.00036358	48.0515	22.2886	1.08158	5.03237	0.00036358	47.609	22.4958
chrY	1245389	1246001	-3.62283	3.66096	3.45644e-10	3.60387	44.3967	-2.555	3.16096	0.000111386	3.6896	21.6825
chr14	66847731	66848191	-2.18796	3.24593	0.000316679	4.44426	20.2508	-2.2301	3.32193	0.000300743	4.61676	21.6602
chr12	35995865	35996127	-1.91255	3.37744	0.000791699	5.35604	20.1641	-1.96464	3.45345	0.000701733	5.54477	21.642
chr12	12527301	12527812	-1.22733	3.45345	0.0103147	7.15912	16.7618	-1.54577	3.66096	0.00145359	7.40285	21.6133
chr2	181424401	181424705	-2.35234	4.04373	1.08914e-06	7.2983	37.269	-1.54577	3.66096	0.00145359	7.40285	21.6133
chr6	51287801	51288398	-1.31605	3.5	0.00716299	7.17	17.8522	-1.54577	3.66096	0.00145359	7.40285	21.6133
chr17	6097779	6098236	-1.30006	3.66993	0.0057893	8.11108	19.9727	-1.37427	3.74593	0.00272548	8.33273	21.6016
chr4	89366506	89367214	-1.30006	3.66993	0.0057893	8.11108	19.9727	-1.37427	3.74593	0.00272548	8.33273	21.6016
chr9	64394249	64394476	-1.13813	3.58496	0.0116399	8.08863	17.8028	-1.37427	3.74593	0.00272548	8.33273	21.6016
chr1	92439118	92439375	-1.21524	3.78493	0.00666229	9.04618	21.0033	-1.22087	3.82193	0.00469388	9.26309	21.5911
chr15	75897421	75897625	-1.53641	3.95345	0.00102747	9.09604	26.3851	-1.22087	3.82193	0.00469388	9.26309	21.5911
chr16	33245096	33245664	-1.59253	3.98289	0.000684983	9.10478	27.4581	-1.22087	3.82193	0.00469388	9.26309	21.5911
chr16	91543674	91543899	-1.79658	4.08995	7.96589e-05	9.13664	31.7403	-1.22087	3.82193	0.00469388	9.26309	21.5911
chr2	93421403	93421974	-1.59253	3.98289	0.000684983	9.10478	27.4581	-1.22087	3.82193	0.00469388	9.26309	21.5911
chr2	166945423	166945896	-1.4779	3.92275	0.00152653	9.08694	25.3111	-1.22087	3.82193	0.00469388	9.26309	21.5911
chr9	44626313	44626710	-1.84319	4.11441	5.0692e-05	9.14393	32.8087	-1.22087	3.82193	0.00469388	9.26309	21.5911
chr10	99190799	99191157	-1.07126	3.85368	0.0103265	9.97314	20.9563	-1.0821	3.89068	0.00751021	10.1939	21.5816
chr4	117599113	117600222	-1.27281	3.95943	0.00381633	10.0076	24.1816	-1.0821	3.89068	0.00751021	10.1939	21.5816
chr6	29775544	29776067	-1.55437	4.10716	0.000385471	10.0559	29.5348	-1.0821	3.89068	0.00751021	10.1939	21.5816
chr2	172904898	172905731	1.15429	4.91645	0.000384073	45.0542	20.2423	1.06305	4.95345	0.000603544	44.7858	21.4354
chr5	46578262	46579253	1.13761	5.04638	0.00026341	49.016	22.2784	1.17959	5.01118	0.00016324	48.5359	21.4275
chr7	81326774	81327615	-1.2323	3.2539	0.0129375	6.22359	14.6218	-1.66687	3.52764	0.00110272	6.47197	20.5502
chr15	31562945	31563300	-1.03059	3.35022	0.0203304	7.13505	14.5759	-1.47245	3.62396	0.00220545	7.4011	20.5375
chr19	6163899	6164505	-1.55232	3.62396	0.00220545	7.19905	21.1139	-1.47245	3.62396	0.00220545	7.4011	20.5375
chr5	138473665	138473967	-1.3994	3.54373	0.00490099	7.18023	18.9409	-1.47245	3.62396	0.00220545	7.4011	20.5375
chr11	62584457	62585170	-2.00235	4.03841	2.17252e-05	8.20916	32.8901	-1.30096	3.70893	0.00399737	8.33076	20.5263
chr13	81663529	81663984	-1.80561	3.93518	0.000140455	8.18156	28.6009	-1.30096	3.70893	0.00399737	8.33076	20.5263
chr2	22997471	22997681	-1.75169	3.90689	0.000220173	8.17402	27.5263	-1.30096	3.70893	0.00399737	8.33076	20.5263
chr11	65747309	65747954	-1.69834	4.03841	0.000192736	9.12129	29.6011	-1.14755	3.78493	0.00666229	9.2609	20.5164
chr8	83779599	83779979	-1.06232	3.7047	0.0128651	9.02254	18.8417	-1.14755	3.78493	0.00666229	9.2609	20.5164
chr10	78201053	78201973	-1.87129	4.27345	1.83962e-05	10.1106	36.9908	-1.00878	3.85368	0.0103265	10.1915	20.5073
chr13	54436479	54437478	-1.44856	4.05164	0.00126722	10.0378	27.3966	-1.00878	3.85368	0.0103265	10.1915	20.5073
chr2	102377279	102377927	-1.91114	4.29436	1.16186e-05	10.1175	38.0528	-1.00878	3.85368	0.0103265	10.1915	20.5073
chr3	60584413	60584659	-1.91114	4.29436	1.16186e-05	10.1175	38.0528	-1.00878	3.85368	0.0103265	10.1915	20.5073
chr4	11159563	11159767	-1.27281	3.95943	0.00381633	10.0076	24.1816	-1.00878	3.85368	0.0103265	10.1915	20.5073
chr5	140110139	140110500	-1.60437	4.13339	0.000254908	10.0646	30.6025	-1.00878	3.85368	0.0103265	10.1915	20.5073
chr5	149028405	149028869	-1.20886	3.92587	0.00538776	9.99665	23.1077	-1.00878	3.85368	0.0103265	10.1915	20.5073
chr8	70851546	70851893	-1.14178	3.89068	0.00751021	9.98518	22.0326	-1.00878	3.85368	0.0103265	10.1915	20.5073
chr8	83218306	83218542	-1.44856	4.05164	0.00126722	10.0378	27.3966	-1.00878	3.85368	0.0103265	10.1915	20.5073
chrX	75129566	75129782	-1.87129	4.27345	1.83962e-05	10.1106	36.9908	-1.00878	3.85368	0.0103265	10.1915	20.5073
chr4	104939090	104940056	1.17577	4.77345	0.000561635	41.1075	18.1962	1.00968	4.85368	0.00135236	41.0275	20.3766
chr9	45507482	45508219	1.01254	5.112	0.00062703	49.1211	24.348	1.25291	4.97418	9.7944e-05	48.5244	20.3609
chrY	258940	259482	-2.76401	2.16096	0.0027771	1.71589	11.6557	-3.41362	2.58496	2.75373e-05	1.83802	19.5863
chr4	133902569	133902980	-1.96761	2.79248	0.00583649	3.50321	13.7017	-2.4044	3.08496	0.000316679	3.68781	19.5238
chr13	95607583	95607885	-2.18796	3.24593	0.000316679	4.44426	20.2508	-2.0795	3.24593	0.000791699	4.61451	19.5037
chr7	101647258	101647845	-1.93731	3.11441	0.00142694	4.42524	16.9482	-2.0795	3.24593	0.000791699	4.61451	19.5037
chr11	116096840	116097064	-1.23549	3.0222	0.0236053	5.29434	12.4661	-1.81403	3.37744	0.002639	5.54208	19.4873
chr11	85928154	85928541	-1.00263	3.13339	0.035408	6.19917	12.421	-1.58959	3.48864	0.002639	6.47036	19.4734
chr15	57970170	57970567	-1.2323	3.2539	0.0129375	6.22359	14.6218	-1.58959	3.48864	0.002639	6.47036	19.4734
chr17	24778545	24779154	-1.51777	3.40368	0.00401127	6.25407	17.9083	-1.58959	3.48864	0.002639	6.47036	19.4734
chr6	29762582	29762834	-1.82454	3.56464	0.000701733	6.28699	22.2682	-1.58959	3.48864	0.002639	6.47036	19.4734
chr14	55950150	55950945	-1.3994	3.54373	0.00490099	7.18023	18.9409	-1.39517	3.58496	0.00490099	7.39925	19.4614
chr16	17667721	17668276	-2.50526	4.12396	7.6295e-08	7.31742	41.5447	-1.39517	3.58496	0.00490099	7.39925	19.4614
chr17	50006491	50006944	-1.62283	3.66096	0.00145359	7.20774	22.1984	-1.39517	3.58496	0.00490099	7.39925	19.4614
chr7	46770604	46771056	-1.13248	3.40368	0.0146125	7.14751	15.6698	-1.39517	3.58496	0.00490099	7.39925	19.4614
chr8	117800153	117800401	-1.62283	3.66096	0.00145359	7.20774	22.1984	-1.39517	3.58496	0.00490099	7.39925	19.4614
chr9	72365930	72366890	-1.68991	3.69616	0.000947993	7.21602	23.2815	-1.39517	3.58496	0.00490099	7.39925	19.4614
chr1	164315233	164315631	-2.00235	4.03841	2.17252e-05	8.20916	32.8901	-1.22367	3.66993	0.00827042	8.32868	19.4509
chr11	50355430	50355780	-1.8575	3.96241	8.89549e-05	8.18883	29.6746	-1.22367	3.66993	0.00827042	8.32868	19.4509
chr17	4428428	4428797	-1.30006	3.66993	0.0057893	8.11108	19.9727	-1.22367	3.66993	0.00827042	8.32868	19.4509
chr17	80048045	80048548	-1.37439	3.70893	0.00399737	8.12141	21.0555	-1.22367	3.66993	0.00827042	8.32868	19.4509
chr18	73836259	73836529	-1.22148	3.62869	0.00827042	8.10018	18.8885	-1.22367	3.66993	0.00827042	8.32868	19.4509
chr2	38300663	38301345	-1.57594	3.81468	0.00122449	8.14947	24.2961	-1.22367	3.66993	0.00827042	8.32868	19.4509
chr2	59997691	59998163	-1.04941	3.53841	0.0161167	8.07636	16.7155	-1.22367	3.66993	0.00827042	8.32868	19.4509
chr2	158367555	158368008	-1.22148	3.62869	0.00827042	8.10018	18.8885	-1.22367	3.66993	0.00827042	8.32868	19.4509
chr4	132296062	132296303	-1.30006	3.66993	0.0057893	8.11108	19.9727	-1.22367	3.66993	0.00827042	8.32868	19.4509
chr7	4452412	4452606	-1.13813	3.58496	0.0116399	8.08863	17.8028	-1.22367	3.66993	0.00827042	8.32868	19.4509
chr8	72175655	72176293	-1.37439	3.70893	0.00399737	8.12141	21.0555	-1.22367	3.66993	0.00827042	8.32868	19.4509
chr9	66477812	66478171	-1.13813	3.58496	0.0116399	8.08863	17.8028	-1.22367	3.66993	0.00827042	8.32868	19.4509
chr9	122185108	122185381	-1.22148	3.62869	0.00827042	8.10018	18.8885	-1.22367	3.66993	0.00827042	8.32868	19.4509
chr11	32283235	32283915	-1.69834	4.03841	0.000192736	9.12129	29.6011	-1.07027	3.74593	0.0128651	9.25859	19.4414
chr11	120397998	120398378	-1.97422	4.18316	1.25931e-05	9.16446	36.0087	-1.07027	3.74593	0.0128651	9.25859	19.4414
chr14	20340148	20340530	-1.4779	3.92275	0.00152653	9.08694	25.3111	-1.07027	3.74593	0.0128651	9.25859	19.4414
chr18	5342852	5343487	-1.06232	3.7047	0.0128651	9.02254	18.8417	-1.07027	3.74593	0.0128651	9.25859	19.4414
chr19	37050592	37051072	-1.14091	3.74593	0.0093272	9.03468	19.9232	-1.07027	3.74593	0.0128651	9.25859	19.4414
chr5	65752486	65752667	-1.06232	3.7047	0.0128651	9.02254	18.8417	-1.07027	3.74593	0.0128651	9.25859	19.4414
chr5	137301244	137301591	-1.53641	3.95345	0.00102747	9.09604	26.3851	-1.07027	3.74593	0.0128651	9.25859	19.4414
chr6	64970101	64970495	-1.35283	3.85712	0.00326531	9.06751	23.1596	-1.07027	3.74593	0.0128651	9.25859	19.4414
chr7	24335738	24336283	-1.28576	3.82193	0.00469388	9.05711	22.0821	-1.07027	3.74593	0.0128651	9.25859	19.4414
chr8	116622219	116623059	1.02691	4.78112	0.00164332	39.2488	19.2617	1.01923	4.78112	0.00164332	39.1444	19.3131
chr8	120696818	120697634	1.37242	4.59984	0.000240206	39.0174	15.0702	1.01923	4.78112	0.00164332	39.1444	19.3131
chr1	106710221	106710540	1.13113	4.83089	0.00064398	42.1206	19.2305	1.11968	4.83089	0.00064398	41.9538	19.307
chr2	58357120	58358343	1.72177	4.55426	1.31139e-05	42.6699	12.9365	1.15168	4.84674	0.000464264	42.8905	19.305
chr2	73033779	73034353	1.47928	4.74593	4.39758e-05	44.8043	16.0699	1.21365	4.87744	0.000236353	44.764	19.3012
chr11	114531282	114531779	1.87764	4.62869	2.24077e-06	47.4229	12.9052	1.30192	4.92118	8.18287e-05	47.5751	19.2958
chr5	38478972	38479463	1.07365	5.07994	0.000412294	49.0697	23.3138	1.33019	4.93518	5.67791e-05	48.5123	19.2941
chr14	21019039	21019528	-1.23549	3.0222	0.0236053	5.29434	12.4661	-1.73233	3.33621	0.00401127	5.54061	18.4095
chr15	75660092	75660509	-1.46516	3.1427	0.00739288	5.31519	14.6749	-1.73233	3.33621	0.00401127	5.54061	18.4095
chr4	46657174	46657453	-1.10446	2.95345	0.0333252	5.28248	11.3583	-1.73233	3.33621	0.00401127	5.54061	18.4095
chr7	78927303	78927787	-2.51999	3.69616	2.74298e-06	5.41202	31.042	-1.73233	3.33621	0.00401127	5.54061	18.4095
chr7	119023507	119023950	-1.56704	3.19616	0.00485158	5.32447	15.7762	-1.73233	3.33621	0.00401127	5.54061	18.4095
chr8	121874050	121874369	-1.23549	3.0222	0.0236053	5.29434	12.4661	-1.73233	3.33621	0.00401127	5.54061	18.4095
chr11	69867184	69867763	-2.77749	4.06464	7.05689e-09	6.39037	43.816	-1.50789	3.44741	0.00401127	6.46865	18.3964
chr12	76752732	76752998	-1.33419	3.30735	0.00889456	6.23445	15.7191	-1.50789	3.44741	0.00401127	6.46865	18.3964
chr13	75874623	75875212	-2.0752	3.69616	6.44689e-05	6.31402	26.6075	-1.50789	3.44741	0.00401127	6.46865	18.3964
chr6	47461339	47461682	-1.12226	3.19616	0.0184822	6.21188	13.5225	-1.50789	3.44741	0.00401127	6.46865	18.3964
chr16	35756755	35757157	-1.55232	3.62396	0.00220545	7.19905	21.1139	-1.31347	3.54373	0.00716299	7.3973	18.3851
chr19	46226287	46226769	-1.13248	3.40368	0.0146125	7.14751	15.6698	-1.31347	3.54373	0.00716299	7.3973	18.3851
chrX	48683497	48683798	-1.22733	3.45345	0.0103147	7.15912	16.7618	-1.31347	3.54373	0.00716299	7.3973	18.3851
chr1	39644956	39645424	-1.63706	3.84674	0.000808164	8.158	25.3739	-1.14197	3.62869	0.0116399	8.32648	18.3751
chr10	21831135	21831727	-2.04743	4.06206	1.34185e-05	8.21549	33.9602	-1.14197	3.62869	0.0116399	8.32648	18.3751
chr11	84794390	84794999	-1.63706	3.84674	0.000808164	8.158	25.3739	-1.14197	3.62869	0.0116399	8.32648	18.3751
chr16	33401022	33401230	-1.22148	3.62869	0.00827042	8.10018	18.8885	-1.14197	3.62869	0.0116399	8.32648	18.3751
chr2	90710863	90711198	-1.69557	3.87744	0.000528415	8.16617	26.4506	-1.14197	3.62869	0.0116399	8.32648	18.3751
chr18	12795847	12796307	1.65462	4.5222	3.07581e-05	40.772	12.9501	1.16866	4.77345	0.000561635	41.0064	18.2411
chr12	102627471	102628547	1.16433	4.84674	0.000464264	43.0789	19.2205	1.23338	4.80551	0.000284549	42.8791	18.2373
chrY	1010158	1010714	-3.98688	3.41645	1.0786e-10	2.68143	42.5146	-2.65491	2.79248	0.000543594	2.76069	17.387
chr5	65242632	65243110	-1.96761	2.79248	0.00583649	3.50321	13.7017	-2.23604	3	0.00142694	3.68581	17.3639
chr9	14390324	14390573	-1.84798	2.72972	0.00427246	3.49605	12.5856	-2.23604	3	0.00142694	3.68581	17.3639
chr11	20823341	20823729	-2.12448	3.48864	0.000183061	5.37551	23.4397	-1.64568	3.29248	0.00601691	5.53906	17.3315
chr2	13264988	13265217	-1.56704	3.19616	0.00485158	5.32447	15.7762	-1.64568	3.29248	0.00601691	5.53906	17.3315
chr4	93496796	93497209	-1.75062	3.29248	0.00200564	5.34122	17.9734	-1.64568	3.29248	0.00601691	5.53906	17.3315
chr4	147813864	147814060	-1.75062	3.29248	0.00200564	5.34122	17.9734	-1.64568	3.29248	0.00601691	5.53906	17.3315
chr5	33238683	33239081	-1.00263	3.13339	0.035408	6.19917	12.421	-1.42123	3.40368	0.00601691	6.46684	17.3191
chr9	50666540	50666799	-1.95558	3.63339	0.000276498	6.30111	24.4402	-1.42123	3.40368	0.00601691	6.46684	17.3191
chr9	121241807	121242188	-1.12226	3.19616	0.0184822	6.21188	13.5225	-1.42123	3.40368	0.00601691	6.46684	17.3191
chr1	91548995	91549496	-1.92961	3.82193	9.78546e-05	7.24568	27.6026	-1.22681	3.5	0.0103147	7.39523	17.3085
chr10	67154520	67155018	-1.62283	3.66096	0.00145359	7.20774	22.1984	-1.22681	3.5	0.0103147	7.39523	17.3085
chr12	84798837	84799609	-2.18027	3.95345	8.47811e-06	7.27683	32.9814	-1.22681	3.5	0.0103147	7.39523	17.3085
chr12	99440753	99441430	-1.13248	3.40368	0.0146125	7.14751	15.6698	-1.22681	3.5	0.0103147	7.39523	17.3085
chr14	16318819	16319051	-1.55232	3.62396	0.00220545	7.19905	21.1139	-1.22681	3.5	0.0103147	7.39523	17.3085
chr2	77515553	77516098	-2.3113	4.0222	1.83173e-06	7.29317	36.1982	-1.22681	3.5	0.0103147	7.39523	17.3085
chr5	64667038	64667479	-2.57578	4.16096	2.57072e-08	7.32626	43.6785	-1.22681	3.5	0.0103147	7.39523	17.3085
chr6	18503009	18504050	-1.3994	3.54373	0.00490099	7.18023	18.9409	-1.22681	3.5	0.0103147	7.39523	17.3085
chr7	49291184	49292150	-2.13366	3.92899	1.39889e-05	7.27103	31.9074	-1.22681	3.5	0.0103147	7.39523	17.3085
chr1	118466085	118466332	-1.37439	3.70893	0.00399737	8.12141	21.0555	-1.05532	3.58496	0.0161167	8.32416	17.2991
chr11	114657787	114658137	-1.30006	3.66993	0.0057893	8.11108	19.9727	-1.05532	3.58496	0.0161167	8.32416	17.2991
chr12	72520548	72520998	-1.30006	3.66993	0.0057893	8.11108	19.9727	-1.05532	3.58496	0.0161167	8.32416	17.2991
chr16	55519732	55519968	-1.30006	3.66993	0.0057893	8.11108	19.9727	-1.05532	3.58496	0.0161167	8.32416	17.2991
chr16	96969655	96970754	-1.8575	3.96241	8.89549e-05	8.18883	29.6746	-1.05532	3.58496	0.0161167	8.32416	17.2991
chr17	88014290	88015046	-1.04941	3.53841	0.0161167	8.07636	16.7155	-1.05532	3.58496	0.0161167	8.32416	17.2991
chr2	128635366	128636200	-2.55978	4.33089	5.73295e-09	8.28785	48.8667	-1.05532	3.58496	0.0161167	8.32416	17.2991
chr3	86761564	86761976	-1.13813	3.58496	0.0116399	8.08863	17.8028	-1.05532	3.58496	0.0161167	8.32416	17.2991
chr6	70849914	70850276	-1.13813	3.58496	0.0116399	8.08863	17.8028	-1.05532	3.58496	0.0161167	8.32416	17.2991
chr7	135397774	135398217	-1.51199	3.78112	0.00183674	8.14055	23.2171	-1.05532	3.58496	0.0161167	8.32416	17.2991
chr19	16992126	16992618	1.72306	4.30367	6.18781e-05	35.8821	10.8689	1.07968	4.6427	0.0017935	36.3162	17.1824
chr9	77427715	77428671	1.16562	4.59615	0.00115055	36.2261	16.1486	1.07968	4.6427	0.0017935	36.3162	17.1824
chr6	38785449	38786134	2.28896	4.08245	3.0632e-06	37.451	7.66334	1.1525	4.67878	0.000947135	38.1874	17.1784
chr1	78686955	78687258	-1.5721	2.58496	0.0174561	3.47958	10.3461	-2.14379	2.95345	0.00231028	3.68471	16.2835
chr6	31369963	31370205	-1.5721	2.58496	0.0174561	3.47958	10.3461	-2.14379	2.95345	0.00231028	3.68471	16.2835
chr16	4235615	4235967	-1.74057	3.01118	0.00369644	4.41036	14.738	-1.81889	3.11441	0.00485158	4.61063	16.2667
chr6	137740990	137741326	-1.74057	3.01118	0.00369644	4.41036	14.738	-1.81889	3.11441	0.00485158	4.61063	16.2667
chr1	120154292	120154563	-1.23549	3.0222	0.0236053	5.29434	12.4661	-1.55343	3.24593	0.00889456	5.53742	16.2531
chr18	46324983	46325354	-1.10446	2.95345	0.0333252	5.28248	11.3583	-1.55343	3.24593	0.00889456	5.53742	16.2531
chr2	152615553	152615961	-1.23549	3.0222	0.0236053	5.29434	12.4661	-1.55343	3.24593	0.00889456	5.53742	16.2531
chr4	25257937	25258471	-1.23549	3.0222	0.0236053	5.29434	12.4661	-1.55343	3.24593	0.00889456	5.53742	16.2531
chr6	54587759	54588135	-1.35512	3.08496	0.0110893	5.30519	13.5716	-1.55343	3.24593	0.00889456	5.53742	16.2531
chr7	66101661	66102173	-1.35512	3.08496	0.0110893	5.30519	13.5716	-1.55343	3.24593	0.00889456	5.53742	16.2531
chr1	84849920	84850224	-1.33419	3.30735	0.00889456	6.23445	15.7191	-1.32898	3.35712	0.00889456	6.46491	16.2415
chr11	84172963	84173599	-2.55405	3.94741	3.46543e-07	6.36598	37.3862	-1.32898	3.35712	0.00889456	6.46491	16.2415
chr13	100953080	100953546	-1.42904	3.35712	0.00601691	6.24458	16.8146	-1.32898	3.35712	0.00889456	6.46491	16.2415
chr13	102850631	102851010	-1.51777	3.40368	0.00401127	6.25407	17.9083	-1.32898	3.35712	0.00889456	6.46491	16.2415
chr18	80868934	80869313	-1.2323	3.2539	0.0129375	6.22359	14.6218	-1.32898	3.35712	0.00889456	6.46491	16.2415
chr2	26273583	26273905	-1.2323	3.2539	0.0129375	6.22359	14.6218	-1.32898	3.35712	0.00889456	6.46491	16.2415
chr2	135744695	135745098	-1.2323	3.2539	0.0129375	6.22359	14.6218	-1.32898	3.35712	0.00889456	6.46491	16.2415
chr2	148654964	148655314	-1.51777	3.40368	0.00401127	6.25407	17.9083	-1.32898	3.35712	0.00889456	6.46491	16.2415
chr6	149010667	149011138	-1.42904	3.35712	0.00601691	6.24458	16.8146	-1.32898	3.35712	0.00889456	6.46491	16.2415
chr7	132304767	132305014	-1.2323	3.2539	0.0129375	6.22359	14.6218	-1.32898	3.35712	0.00889456	6.46491	16.2415
chr7	138840676	138841035	-1.51777	3.40368	0.00401127	6.25407	17.9083	-1.32898	3.35712	0.00889456	6.46491	16.2415
chr8	23219700	23220231	-1.60111	3.44741	0.002639	6.263	19.0005	-1.32898	3.35712	0.00889456	6.46491	16.2415
chr9	71480328	71480691	-2.0752	3.69616	6.44689e-05	6.31402	26.6075	-1.32898	3.35712	0.00889456	6.46491	16.2415
chr9	78552925	78553338	-1.12226	3.19616	0.0184822	6.21188	13.5225	-1.32898	3.35712	0.00889456	6.46491	16.2415
chr1	87041168	87041430	-1.13248	3.40368	0.0146125	7.14751	15.6698	-1.13456	3.45345	0.0146125	7.39303	16.2315
chr1	178769981	178770802	-1.22733	3.45345	0.0103147	7.15912	16.7618	-1.13456	3.45345	0.0146125	7.39303	16.2315
chr13	93158281	93158710	-1.55232	3.62396	0.00220545	7.19905	21.1139	-1.13456	3.45345	0.0146125	7.39303	16.2315
chr18	36423113	36423615	-1.3994	3.54373	0.00490099	7.18023	18.9409	-1.13456	3.45345	0.0146125	7.39303	16.2315
chr18	46334007	46334412	-1.03059	3.35022	0.0203304	7.13505	14.5759	-1.13456	3.45345	0.0146125	7.39303	16.2315
chr19	46191192	46191812	-1.55232	3.62396	0.00220545	7.19905	21.1139	-1.13456	3.45345	0.0146125	7.39303	16.2315
chr5	123425169	123425439	-1.3994	3.54373	0.00490099	7.18023	18.9409	-1.13456	3.45345	0.0146125	7.39303	16.2315
chr6	58603540	58604118	-1.03059	3.35022	0.0203304	7.13505	14.5759	-1.13456	3.45345	0.0146125	7.39303	16.2315
chr7	96769870	96770145	-1.03059	3.35022	0.0203304	7.13505	14.5759	-1.13456	3.45345	0.0146125	7.39303	16.2315
chr7	101114381	101114685	-1.03059	3.35022	0.0203304	7.13505	14.5759	-1.13456	3.45345	0.0146125	7.39303	16.2315
chr8	84585407	84585619	-1.31605	3.5	0.00716299	7.17	17.8522	-1.13456	3.45345	0.0146125	7.39303	16.2315
chr10	116394363	116394983	1.09701	4.46832	0.00267028	32.3753	15.135	1.01437	4.51809	0.00297372	32.5655	16.1213
chr8	11443694	11444717	1.60215	4.24593	0.000217976	33.0596	10.8894	1.05539	4.53841	0.00218656	33.5003	16.1193
chr4	149541727	149542259	1.55279	4.35368	0.000185634	35.0192	11.9363	1.13411	4.57741	0.00159306	35.3702	16.1152
chr5	17111575	17112454	1.26047	4.54638	0.000708028	36.1673	15.0965	1.17193	4.59615	0.00115055	36.3054	16.1133
chr4	107635988	107636221	-2.40217	2.58496	0.00259399	2.60968	13.7948	-2.46404	2.69616	0.0015564	2.75899	15.223
chrY	1285700	1286135	-3.17154	2.98864	1.08965e-05	2.64427	23.8251	-2.46404	2.69616	0.0015564	2.75899	15.223
chr4	120580958	120581217	-2.44646	3.04373	0.000527799	3.53204	19.2523	-2.04517	2.90368	0.00369644	3.68354	15.2028
chr6	83316045	83316321	-2.59937	3.12396	0.0001885	3.5413	21.4611	-2.04517	2.90368	0.00369644	3.68354	15.2028
chr8	18638865	18639455	-3.47798	3.58496	3.85828e-09	3.59495	40.0562	-2.04517	2.90368	0.00369644	3.68354	15.2028
chr9	62958449	62958770	-1.84798	2.72972	0.00427246	3.49605	12.5856	-2.04517	2.90368	0.00369644	3.68354	15.2028
chr9	116060739	116061115	-1.71695	2.66096	0.0111084	3.48822	11.4672	-2.04517	2.90368	0.00369644	3.68354	15.2028
chrX	36506841	36507140	-1.41017	2.5	0.0268555	3.46995	9.22204	-2.04517	2.90368	0.00369644	3.68354	15.2028
chr6	124328345	124328655	-1.07309	2.66096	0.0436401	4.36027	9.17374	-1.72027	3.06464	0.00739288	4.60917	15.1871
chr9	122959752	122960069	-1.23502	2.74593	0.0305481	4.37237	10.2919	-1.72027	3.06464	0.00739288	4.60917	15.1871
chr14	27560497	27560791	-1.35512	3.08496	0.0110893	5.30519	13.5716	-1.45481	3.19616	0.0129375	5.53565	15.1744
chr2	181196476	181197124	-2.24955	3.55426	3.95605e-05	5.38702	25.6171	-1.45481	3.19616	0.0129375	5.53565	15.1744
chr5	118704084	118704464	-1.23549	3.0222	0.0236053	5.29434	12.4661	-1.45481	3.19616	0.0129375	5.53565	15.1744
chr6	114697795	114698375	-1.75062	3.29248	0.00200564	5.34122	17.9734	-1.45481	3.19616	0.0129375	5.53565	15.1744
chr9	65780774	65781073	-2.12448	3.48864	0.000183061	5.37551	23.4397	-1.45481	3.19616	0.0129375	5.53565	15.1744
chr1	92148666	92148975	-1.00263	3.13339	0.035408	6.19917	12.421	-1.23037	3.30735	0.0129375	6.46286	15.1636
chr11	29237291	29237705	-1.33419	3.30735	0.00889456	6.23445	15.7191	-1.23037	3.30735	0.0129375	6.46286	15.1636
chr12	33207980	33208365	-1.12226	3.19616	0.0184822	6.21188	13.5225	-1.23037	3.30735	0.0129375	6.46286	15.1636
chr14	70961885	70962366	-1.12226	3.19616	0.0184822	6.21188	13.5225	-1.23037	3.30735	0.0129375	6.46286	15.1636
chr15	57827483	57827929	-1.51777	3.40368	0.00401127	6.25407	17.9083	-1.23037	3.30735	0.0129375	6.46286	15.1636
chr16	91390111	91390386	-1.89162	3.59984	0.000442397	6.29421	23.3548	-1.23037	3.30735	0.0129375	6.46286	15.1636
chr17	29669106	29669377	-1.33419	3.30735	0.00889456	6.23445	15.7191	-1.23037	3.30735	0.0129375	6.46286	15.1636
chr7	65519838	65520415	-1.60111	3.44741	0.002639	6.263	19.0005	-1.23037	3.30735	0.0129375	6.46286	15.1636
chr8	104232004	104232384	-1.12226	3.19616	0.0184822	6.21188	13.5225	-1.23037	3.30735	0.0129375	6.46286	15.1636
chr10	31062584	31063258	-1.47798	3.58496	0.00330817	7.1899	20.0281	-1.03594	3.40368	0.0203304	7.39067	15.1542
chr11	54694299	54694731	-1.31605	3.5	0.00716299	7.17	17.8522	-1.03594	3.40368	0.0203304	7.39067	15.1542
chr11	69717027	69717329	-1.47798	3.58496	0.00330817	7.1899	20.0281	-1.03594	3.40368	0.0203304	7.39067	15.1542
chr11	88408222	88408619	-1.03059	3.35022	0.0203304	7.13505	14.5759	-1.03594	3.40368	0.0203304	7.39067	15.1542
chr15	53272729	53273227	-2.269	4	3.06708e-06	7.28789	35.1268	-1.03594	3.40368	0.0203304	7.39067	15.1542
chr19	4181914	4182281	-1.22733	3.45345	0.0103147	7.15912	16.7618	-1.03594	3.40368	0.0203304	7.39067	15.1542
chr2	30891025	30891450	-1.03059	3.35022	0.0203304	7.13505	14.5759	-1.03594	3.40368	0.0203304	7.39067	15.1542
chr2	125706510	125706973	-1.22733	3.45345	0.0103147	7.15912	16.7618	-1.03594	3.40368	0.0203304	7.39067	15.1542
chr5	121872178	121872516	-1.03059	3.35022	0.0203304	7.13505	14.5759	-1.03594	3.40368	0.0203304	7.39067	15.1542
chr5	144231478	144231728	-1.13248	3.40368	0.0146125	7.14751	15.6698	-1.03594	3.40368	0.0203304	7.39067	15.1542
chr7	6265760	6266197	-1.62283	3.66096	0.00145359	7.20774	22.1984	-1.03594	3.40368	0.0203304	7.39067	15.1542
chr7	117498998	117499548	-1.47798	3.58496	0.00330817	7.1899	20.0281	-1.03594	3.40368	0.0203304	7.39067	15.1542
chr8	107510233	107510722	-1.62283	3.66096	0.00145359	7.20774	22.1984	-1.03594	3.40368	0.0203304	7.39067	15.1542
chr8	111268366	111268585	-1.03059	3.35022	0.0203304	7.13505	14.5759	-1.03594	3.40368	0.0203304	7.39067	15.1542
chr9	13251317	13251620	-1.3994	3.54373	0.00490099	7.18023	18.9409	-1.03594	3.40368	0.0203304	7.39067	15.1542
chrX	75102238	75102685	-1.22733	3.45345	0.0103147	7.15912	16.7618	-1.03594	3.40368	0.0203304	7.39067	15.1542
chrX	136138847	136139926	-1.55232	3.62396	0.00220545	7.19905	21.1139	-1.03594	3.40368	0.0203304	7.39067	15.1542
chr16	43955609	43956179	1.22005	4.31468	0.00207915	30.3727	13.038	1.02732	4.42587	0.00363612	30.6865	15.0555
chr1	133418008	133418692	1.82258	4.04373	0.000124346	31.0178	8.76917	1.07078	4.44741	0.00267028	31.6208	15.0534
chr10	17485005	17485783	1.5158	4.2047	0.000486643	31.181	10.9041	1.07078	4.44741	0.00267028	31.6208	15.0534
chr19	17014362	17015056	1.05322	4.44741	0.00363612	31.4289	15.1453	1.07078	4.44741	0.00267028	31.6208	15.0534
chr9	92325846	92326298	1.26515	4.33621	0.00147553	31.3151	13.0289	1.07078	4.44741	0.00267028	31.6208	15.0534
chr10	21399807	21400459	1.00216	4.51809	0.00400542	32.4279	16.1898	1.11299	4.46832	0.00194202	32.5551	15.0514
chr15	11971884	11972257	1.09701	4.46832	0.00267028	32.3753	15.135	1.11299	4.46832	0.00194202	32.5551	15.0514
chr13	64440593	64440997	1.54795	4.47126	0.000105751	37.929	12.9716	1.34336	4.58245	0.000346964	38.1639	15.0404
chr2	48908944	48909183	-2.45723	2	0.0134277	1.70691	9.37367	-2.94847	2.35022	0.000915527	1.83526	14.1669
chrY	1286414	1286786	-2.28255	2.5222	0.00427246	2.60435	12.6711	-2.35811	2.6427	0.00259399	2.75805	14.1404
chr18	37218012	37218545	-1.41017	2.5	0.0268555	3.46995	9.22204	-1.93924	2.85022	0.00583649	3.68228	14.1217
chr2	160771871	160772240	-1.96761	2.79248	0.00583649	3.50321	13.7017	-1.93924	2.85022	0.00583649	3.68228	14.1217
chr3	129299931	129300202	-1.22659	2.40368	0.0402832	3.45906	8.09467	-1.93924	2.85022	0.00583649	3.68228	14.1217
chr7	19760833	19761226	-2.52504	3.08496	0.000316679	3.53679	20.3574	-1.93924	2.85022	0.00583649	3.68228	14.1217
chr11	67676243	67676501	-1.74057	3.01118	0.00369644	4.41036	14.738	-1.61434	3.01118	0.0110893	4.60759	14.1072
chr12	33434809	33435089	-1.37987	2.82193	0.0208282	4.38322	11.4071	-1.61434	3.01118	0.0110893	4.60759	14.1072
chr12	110376633	110376860	-2.02604	3.16096	0.000872016	4.43196	18.0507	-1.61434	3.01118	0.0110893	4.60759	14.1072
chr18	62126670	62127022	-1.23502	2.74593	0.0305481	4.37237	10.2919	-1.61434	3.01118	0.0110893	4.60759	14.1072
chr2	150655011	150655627	-2.7954	3.56464	7.61938e-07	4.49071	31.1755	-1.61434	3.01118	0.0110893	4.60759	14.1072
chr3	146754274	146754643	-1.63053	2.95345	0.00583649	4.40207	13.63	-1.61434	3.01118	0.0110893	4.60759	14.1072
chr9	70078001	70078294	-2.02604	3.16096	0.000872016	4.43196	18.0507	-1.61434	3.01118	0.0110893	4.60759	14.1072
chr1	171070327	171070603	-1.10446	2.95345	0.0333252	5.28248	11.3583	-1.34888	3.1427	0.0184822	5.53376	14.0953
chr13	9132120	9132442	-1.83397	3.33621	0.00126672	5.34885	19.0695	-1.34888	3.1427	0.0184822	5.53376	14.0953
chr2	105709084	105709453	-1.23549	3.0222	0.0236053	5.29434	12.4661	-1.34888	3.1427	0.0184822	5.53376	14.0953
chr3	88027876	88028105	-1.10446	2.95345	0.0333252	5.28248	11.3583	-1.34888	3.1427	0.0184822	5.53376	14.0953
chr5	23890803	23891116	-1.35512	3.08496	0.0110893	5.30519	13.5716	-1.34888	3.1427	0.0184822	5.53376	14.0953
chr6	8423155	8423615	-1.91255	3.37744	0.000791699	5.35604	20.1641	-1.34888	3.1427	0.0184822	5.53376	14.0953
chr7	24116485	24116983	-1.35512	3.08496	0.0110893	5.30519	13.5716	-1.34888	3.1427	0.0184822	5.53376	14.0953
chr7	55810046	55810475	-1.10446	2.95345	0.0333252	5.28248	11.3583	-1.34888	3.1427	0.0184822	5.53376	14.0953
chr10	61072417	61072713	-1.12226	3.19616	0.0184822	6.21188	13.5225	-1.12444	3.2539	0.0184822	6.46065	14.0853
chr10	130343987	130344384	-1.42904	3.35712	0.00601691	6.24458	16.8146	-1.12444	3.2539	0.0184822	6.46065	14.0853
chr11	22777583	22777894	-1.12226	3.19616	0.0184822	6.21188	13.5225	-1.12444	3.2539	0.0184822	6.46065	14.0853
chr11	113512043	113512639	-1.51777	3.40368	0.00401127	6.25407	17.9083	-1.12444	3.2539	0.0184822	6.46065	14.0853
chr14	20584669	20585054	-1.12226	3.19616	0.0184822	6.21188	13.5225	-1.12444	3.2539	0.0184822	6.46065	14.0853
chr14	65170032	65170329	-1.51777	3.40368	0.00401127	6.25407	17.9083	-1.12444	3.2539	0.0184822	6.46065	14.0853
chr14	121579087	121579356	-1.33419	3.30735	0.00889456	6.23445	15.7191	-1.12444	3.2539	0.0184822	6.46065	14.0853
chr17	78294928	78295468	-1.95558	3.63339	0.000276498	6.30111	24.4402	-1.12444	3.2539	0.0184822	6.46065	14.0853
chr19	5516463	5516692	-1.2323	3.2539	0.0129375	6.22359	14.6218	-1.12444	3.2539	0.0184822	6.46065	14.0853
chr2	22587504	22588345	-1.00263	3.13339	0.035408	6.19917	12.421	-1.12444	3.2539	0.0184822	6.46065	14.0853
chr3	60333783	60334025	-1.89162	3.59984	0.000442397	6.29421	23.3548	-1.12444	3.2539	0.0184822	6.46065	14.0853
chr3	108710100	108710415	-1.00263	3.13339	0.035408	6.19917	12.421	-1.12444	3.2539	0.0184822	6.46065	14.0853
chr6	57812419	57812692	-1.33419	3.30735	0.00889456	6.23445	15.7191	-1.12444	3.2539	0.0184822	6.46065	14.0853
chr6	91138352	91138773	-2.01669	3.66546	0.000105495	6.3077	25.5244	-1.12444	3.2539	0.0184822	6.46065	14.0853
chr6	112202148	112202519	-1.51777	3.40368	0.00401127	6.25407	17.9083	-1.12444	3.2539	0.0184822	6.46065	14.0853
chr9	40333708	40333953	-1.12226	3.19616	0.0184822	6.21188	13.5225	-1.12444	3.2539	0.0184822	6.46065	14.0853
chr9	96299448	96299956	-1.51777	3.40368	0.00401127	6.25407	17.9083	-1.12444	3.2539	0.0184822	6.46065	14.0853
chr9	116087911	116088239	-1.2323	3.2539	0.0129375	6.22359	14.6218	-1.12444	3.2539	0.0184822	6.46065	14.0853
chr1	194935304	194935830	1.86662	3.88078	0.000220173	28.131	7.71392	1.04222	4.32732	0.00445533	28.8086	13.9889
chr1	168226143	168226570	1.91458	3.90368	0.000140455	29.0601	7.70816	1.08844	4.35022	0.00326724	29.7422	13.9869
chr13	46023090	46024081	1.00812	4.42587	0.00490086	30.4831	15.156	1.13325	4.37242	0.00237138	30.676	13.9849
chr13	94559726	94560373	1.00812	4.42587	0.00490086	30.4831	15.156	1.13325	4.37242	0.00237138	30.676	13.9849
chr1	9937352	9937938	1.26515	4.33621	0.00147553	31.3151	13.0289	1.17671	4.39395	0.00170443	31.61	13.9829
chr18	57132694	57133269	1.1551	4.39395	0.00237138	31.3741	14.088	1.17671	4.39395	0.00170443	31.61	13.9829
chr6	87389624	87390088	1.38477	4.27345	0.000871903	31.251	11.9676	1.17671	4.39395	0.00170443	31.61	13.9829
chr11	72573875	72574150	1.55959	4.22561	0.000326964	32.12	10.8966	1.21892	4.41486	0.00121376	32.544	13.9811
chr16	33560281	33560777	1.00216	4.51809	0.00400542	32.4279	16.1898	1.21892	4.41486	0.00121376	32.544	13.9811
chr12	21335863	21336192	-1.66116	2.19616	0.0402832	2.5768	8.14965	-2.2437	2.58496	0.00427246	2.75703	13.0575
chrX	164086735	164087151	-3.03394	2.91645	3.42727e-05	2.63805	21.6068	-2.2437	2.58496	0.00427246	2.75703	13.0575
chr1	134875852	134876116	-2.07765	2.85022	0.00369644	3.50982	14.8156	-1.82483	2.79248	0.00907898	3.68092	13.0402
chr14	73303228	73303675	-1.84798	2.72972	0.00427246	3.49605	12.5856	-1.82483	2.79248	0.00907898	3.68092	13.0402
chr17	85395566	85395964	-1.84798	2.72972	0.00427246	3.49605	12.5856	-1.82483	2.79248	0.00907898	3.68092	13.0402
chr2	34461856	34462195	-2.44646	3.04373	0.000527799	3.53204	19.2523	-1.82483	2.79248	0.00907898	3.68092	13.0402
chr2	94371171	94371441	-2.27438	2.95345	0.00142694	3.52165	17.0374	-1.82483	2.79248	0.00907898	3.68092	13.0402
chr3	103393710	103393888	-1.22659	2.40368	0.0402832	3.45906	8.09467	-1.82483	2.79248	0.00907898	3.68092	13.0402
chr6	114707080	114707682	-2.52504	3.08496	0.000316679	3.53679	20.3574	-1.82483	2.79248	0.00907898	3.68092	13.0402
chr9	95926888	95927161	-2.59937	3.12396	0.0001885	3.5413	21.4611	-1.82483	2.79248	0.00907898	3.68092	13.0402
chr1	132165953	132166196	-1.07309	2.66096	0.0436401	4.36027	9.17374	-1.49993	2.95345	0.0163422	4.60589	13.0268
chr10	86352570	86352967	-2.10938	3.2047	0.000527799	4.43829	19.1515	-1.49993	2.95345	0.0163422	4.60589	13.0268
chr11	6636201	6636480	-1.37987	2.82193	0.0208282	4.38322	11.4071	-1.49993	2.95345	0.0163422	4.60589	13.0268
chr16	96718284	96718589	-1.51091	2.89068	0.00907898	4.39306	12.5197	-1.49993	2.95345	0.0163422	4.60589	13.0268
chr17	73247802	73248166	-2.18796	3.24593	0.000316679	4.44426	20.2508	-1.49993	2.95345	0.0163422	4.60589	13.0268
chr3	157931655	157931886	-1.23502	2.74593	0.0305481	4.37237	10.2919	-1.49993	2.95345	0.0163422	4.60589	13.0268
chr6	87139784	87140236	-2.10938	3.2047	0.000527799	4.43829	19.1515	-1.49993	2.95345	0.0163422	4.60589	13.0268
chr7	101725216	101725488	-1.07309	2.66096	0.0436401	4.36027	9.17374	-1.49993	2.95345	0.0163422	4.60589	13.0268
chr8	88369198	88369656	-1.07309	2.66096	0.0436401	4.36027	9.17374	-1.49993	2.95345	0.0163422	4.60589	13.0268
chr1	10045803	10046158	-1.10446	2.95345	0.0333252	5.28248	11.3583	-1.23447	3.08496	0.0258751	5.53172	13.0159
chr10	59659235	59659469	-1.23549	3.0222	0.0236053	5.29434	12.4661	-1.23447	3.08496	0.0258751	5.53172	13.0159
chr10	62631688	62632250	-1.83397	3.33621	0.00126672	5.34885	19.0695	-1.23447	3.08496	0.0258751	5.53172	13.0159
chr10	93176891	93177219	-1.83397	3.33621	0.00126672	5.34885	19.0695	-1.23447	3.08496	0.0258751	5.53172	13.0159
chr15	85686957	85687305	-1.56704	3.19616	0.00485158	5.32447	15.7762	-1.23447	3.08496	0.0258751	5.53172	13.0159
chr17	73096415	73096820	-1.56704	3.19616	0.00485158	5.32447	15.7762	-1.23447	3.08496	0.0258751	5.53172	13.0159
chr19	55347870	55348534	-1.98688	3.41645	0.000490099	5.36286	21.2573	-1.23447	3.08496	0.0258751	5.53172	13.0159
chr2	126954721	126955009	-1.75062	3.29248	0.00200564	5.34122	17.9734	-1.23447	3.08496	0.0258751	5.53172	13.0159
chr2	153824569	153824937	-1.10446	2.95345	0.0333252	5.28248	11.3583	-1.23447	3.08496	0.0258751	5.53172	13.0159
chr5	20801741	20802106	-1.75062	3.29248	0.00200564	5.34122	17.9734	-1.23447	3.08496	0.0258751	5.53172	13.0159
chr5	135843486	135843800	-1.10446	2.95345	0.0333252	5.28248	11.3583	-1.23447	3.08496	0.0258751	5.53172	13.0159
chr8	26000089	26000735	-2.0574	3.45345	0.000300743	5.36934	22.3491	-1.23447	3.08496	0.0258751	5.53172	13.0159
chr9	7554405	7554691	-1.10446	2.95345	0.0333252	5.28248	11.3583	-1.23447	3.08496	0.0258751	5.53172	13.0159
chr9	88718214	88718461	-1.46516	3.1427	0.00739288	5.31519	14.6749	-1.23447	3.08496	0.0258751	5.53172	13.0159
chr1	53194393	53194869	-1.42904	3.35712	0.00601691	6.24458	16.8146	-1.01003	3.19616	0.0258751	6.45826	13.0066
chr1	164296548	164296831	-1.00263	3.13339	0.035408	6.19917	12.421	-1.01003	3.19616	0.0258751	6.45826	13.0066
chr10	4071859	4072192	-2.01669	3.66546	0.000105495	6.3077	25.5244	-1.01003	3.19616	0.0258751	6.45826	13.0066
chr11	69502608	69503010	-1.82454	3.56464	0.000701733	6.28699	22.2682	-1.01003	3.19616	0.0258751	6.45826	13.0066
chr12	24603358	24603579	-1.33419	3.30735	0.00889456	6.23445	15.7191	-1.01003	3.19616	0.0258751	6.45826	13.0066
chr12	84938425	84938900	-1.33419	3.30735	0.00889456	6.23445	15.7191	-1.01003	3.19616	0.0258751	6.45826	13.0066
chr12	111479703	111480236	-1.12226	3.19616	0.0184822	6.21188	13.5225	-1.01003	3.19616	0.0258751	6.45826	13.0066
chr15	8460848	8461239	-1.82454	3.56464	0.000701733	6.28699	22.2682	-1.01003	3.19616	0.0258751	6.45826	13.0066
chr16	55517086	55517552	-1.60111	3.44741	0.002639	6.263	19.0005	-1.01003	3.19616	0.0258751	6.45826	13.0066
chr17	5758613	5758926	-1.12226	3.19616	0.0184822	6.21188	13.5225	-1.01003	3.19616	0.0258751	6.45826	13.0066
chr17	64613944	64614401	-1.89162	3.59984	0.000442397	6.29421	23.3548	-1.01003	3.19616	0.0258751	6.45826	13.0066
chr17	74240332	74240697	-1.42904	3.35712	0.00601691	6.24458	16.8146	-1.01003	3.19616	0.0258751	6.45826	13.0066
chr2	112216063	112216313	-1.2323	3.2539	0.0129375	6.22359	14.6218	-1.01003	3.19616	0.0258751	6.45826	13.0066
chr2	119067564	119067831	-1.2323	3.2539	0.0129375	6.22359	14.6218	-1.01003	3.19616	0.0258751	6.45826	13.0066
chr2	180961618	180961873	-1.2323	3.2539	0.0129375	6.22359	14.6218	-1.01003	3.19616	0.0258751	6.45826	13.0066
chr5	96200248	96200626	-1.82454	3.56464	0.000701733	6.28699	22.2682	-1.01003	3.19616	0.0258751	6.45826	13.0066
chr5	120823764	120824066	-1.33419	3.30735	0.00889456	6.23445	15.7191	-1.01003	3.19616	0.0258751	6.45826	13.0066
chr6	49251241	49251514	-1.12226	3.19616	0.0184822	6.21188	13.5225	-1.01003	3.19616	0.0258751	6.45826	13.0066
chr6	128641185	128641610	-1.2323	3.2539	0.0129375	6.22359	14.6218	-1.01003	3.19616	0.0258751	6.45826	13.0066
chr6	134217745	134218185	-1.75403	3.52764	0.00110272	6.27941	21.1803	-1.01003	3.19616	0.0258751	6.45826	13.0066
chr6	146127355	146127819	-1.67969	3.48864	0.00171535	6.27142	20.0911	-1.01003	3.19616	0.0258751	6.45826	13.0066
chr9	118496017	118496718	-2.18524	3.7539	2.36201e-05	6.32592	28.7705	-1.01003	3.19616	0.0258751	6.45826	13.0066
chrX	151443458	151444032	-1.75403	3.52764	0.00110272	6.27941	21.1803	-1.01003	3.19616	0.0258751	6.45826	13.0066
chr8	13686422	13686833	1.36736	3.98864	0.00267143	25.4982	9.88306	1.00843	4.19616	0.0073873	25.9988	12.9237
chrX	53607595	53608375	1.36736	3.98864	0.00267143	25.4982	9.88306	1.00843	4.19616	0.0073873	25.9988	12.9237
chr18	65122091	65122883	1.5823	3.92899	0.00102747	26.3575	8.80205	1.05952	4.22147	0.00547208	26.9317	12.9216
chr9	45324533	45324961	1.63351	3.95345	0.000684983	27.2881	8.79503	1.10888	4.24593	0.00400634	27.8647	12.9195
chr6	17363366	17364134	1.01557	4.32732	0.00445533	28.5437	14.1187	1.15663	4.26958	0.00290114	28.7979	12.9176
chr8	11601961	11602611	1.24523	4.20681	0.00254061	28.4317	11.9936	1.15663	4.26958	0.00290114	28.7979	12.9176
chr4	33957271	33957947	1.22005	4.31468	0.00207915	30.3727	13.038	1.24766	4.31468	0.00147553	30.6647	12.9139
chr7	116309538	116309819	1.11001	4.37242	0.00326724	30.43	14.0979	1.24766	4.31468	0.00147553	30.6647	12.9139
chr8	117343531	117343871	1.47071	4.18316	0.000718378	30.2427	10.9117	1.24766	4.31468	0.00147553	30.6647	12.9139
chr14	25745385	25746242	1.55959	4.22561	0.000326964	32.12	10.8966	1.33333	4.35712	0.000723093	32.532	12.9104
chr9	33240906	33241918	2.13389	4.0084	1.34185e-05	33.7157	7.68187	1.41424	4.39721	0.000499785	34.3998	12.9071
chr4	151068745	151069438	1.9906	4.12396	2.0149e-05	34.7578	8.74625	1.45307	4.41645	0.000342709	35.3339	12.9055
chr11	53057819	53058487	1.67602	4.6427	1.15346e-05	44.6537	13.9742	1.79321	4.58496	5.47406e-06	44.6804	12.8916
chr11	78227806	78228117	-1.66116	2.19616	0.0402832	2.5768	8.14965	-2.11933	2.5222	0.00694275	2.75592	11.9742
chr19	23123048	23123613	-3.35512	3.08496	1.89058e-06	2.65259	27.1432	-2.11933	2.5222	0.00694275	2.75592	11.9742
chr19	29821018	29821350	-2.15152	2.45345	0.00694275	2.59851	11.5451	-2.11933	2.5222	0.00694275	2.75592	11.9742
chr9	110751434	110751752	-2.28255	2.5222	0.00427246	2.60435	12.6711	-2.11933	2.5222	0.00694275	2.75592	11.9742
chr10	95087690	95088451	-1.84798	2.72972	0.00427246	3.49605	12.5856	-1.70046	2.72972	0.0138855	3.67944	11.9583
chr10	130165129	130165600	-2.36311	3	0.000872016	3.52701	18.1457	-1.70046	2.72972	0.0138855	3.67944	11.9583
chr13	112735107	112735408	-1.71695	2.66096	0.0111084	3.48822	11.4672	-1.70046	2.72972	0.0138855	3.67944	11.9583
chr16	49164428	49164658	-1.22659	2.40368	0.0402832	3.45906	8.09467	-1.70046	2.72972	0.0138855	3.67944	11.9583
chr16	90091969	90092246	-2.07765	2.85022	0.00369644	3.50982	14.8156	-1.70046	2.72972	0.0138855	3.67944	11.9583
chr19	17344898	17345205	-1.22659	2.40368	0.0402832	3.45906	8.09467	-1.70046	2.72972	0.0138855	3.67944	11.9583
chr2	22939634	22940023	-1.71695	2.66096	0.0111084	3.48822	11.4672	-1.70046	2.72972	0.0138855	3.67944	11.9583
chr7	98437486	98438010	-2.07765	2.85022	0.00369644	3.50982	14.8156	-1.70046	2.72972	0.0138855	3.67944	11.9583
chr7	102048598	102048827	-1.5721	2.58496	0.0174561	3.47958	10.3461	-1.70046	2.72972	0.0138855	3.67944	11.9583
chrX	101504671	101505004	-2.07765	2.85022	0.00369644	3.50982	14.8156	-1.70046	2.72972	0.0138855	3.67944	11.9583
chr1	82733357	82733796	-2.7454	3.53841	1.34972e-06	4.48687	30.0878	-1.37556	2.89068	0.0236053	4.60404	11.946
chr12	26438189	26438719	-1.84246	3.06464	0.00231028	4.41806	15.844	-1.37556	2.89068	0.0236053	4.60404	11.946
chr12	32286726	32287027	-2.7454	3.53841	1.34972e-06	4.48687	30.0878	-1.37556	2.89068	0.0236053	4.60404	11.946
chr16	87584739	87585005	-1.07309	2.66096	0.0436401	4.36027	9.17374	-1.37556	2.89068	0.0236053	4.60404	11.946
chr18	21138165	21138422	-1.63053	2.95345	0.00583649	4.40207	13.63	-1.37556	2.89068	0.0236053	4.60404	11.946
chr5	65374362	65374628	-1.63053	2.95345	0.00583649	4.40207	13.63	-1.37556	2.89068	0.0236053	4.60404	11.946
chr6	58610019	58610517	-2.02604	3.16096	0.000872016	4.43196	18.0507	-1.37556	2.89068	0.0236053	4.60404	11.946
chr1	9791043	9791383	-2.4181	3.6427	8.09832e-06	5.40259	28.8751	-1.1101	3.0222	0.035408	5.5295	11.936
chr1	16433477	16433722	-1.10446	2.95345	0.0333252	5.28248	11.3583	-1.1101	3.0222	0.035408	5.5295	11.936
chr1	106395485	106395837	-1.6619	3.24593	0.00313926	5.33312	16.8757	-1.1101	3.0222	0.035408	5.5295	11.936
chr10	12992067	12992305	-1.83397	3.33621	0.00126672	5.34885	19.0695	-1.1101	3.0222	0.035408	5.5295	11.936
chr11	82752203	82752667	-1.91255	3.37744	0.000791699	5.35604	20.1641	-1.1101	3.0222	0.035408	5.5295	11.936
chr11	108447233	108447458	-1.10446	2.95345	0.0333252	5.28248	11.3583	-1.1101	3.0222	0.035408	5.5295	11.936
chr12	33183783	33184471	-1.56704	3.19616	0.00485158	5.32447	15.7762	-1.1101	3.0222	0.035408	5.5295	11.936
chr12	55860046	55860453	-2.12448	3.48864	0.000183061	5.37551	23.4397	-1.1101	3.0222	0.035408	5.5295	11.936
chr12	101055099	101055604	-1.23549	3.0222	0.0236053	5.29434	12.4661	-1.1101	3.0222	0.035408	5.5295	11.936
chr13	14649376	14649603	-1.10446	2.95345	0.0333252	5.28248	11.3583	-1.1101	3.0222	0.035408	5.5295	11.936
chr13	100843983	100844276	-1.91255	3.37744	0.000791699	5.35604	20.1641	-1.1101	3.0222	0.035408	5.5295	11.936
chr15	39901963	39902112	-1.6619	3.24593	0.00313926	5.33312	16.8757	-1.1101	3.0222	0.035408	5.5295	11.936
chr15	76494577	76494821	-1.56704	3.19616	0.00485158	5.32447	15.7762	-1.1101	3.0222	0.035408	5.5295	11.936
chr16	4289535	4289855	-1.46516	3.1427	0.00739288	5.31519	14.6749	-1.1101	3.0222	0.035408	5.5295	11.936
chr16	33154883	33155318	-1.23549	3.0222	0.0236053	5.29434	12.4661	-1.1101	3.0222	0.035408	5.5295	11.936
chr5	36958897	36959159	-1.23549	3.0222	0.0236053	5.29434	12.4661	-1.1101	3.0222	0.035408	5.5295	11.936
chr5	113747692	113748112	-1.35512	3.08496	0.0110893	5.30519	13.5716	-1.1101	3.0222	0.035408	5.5295	11.936
chr5	121766448	121766713	-1.35512	3.08496	0.0110893	5.30519	13.5716	-1.1101	3.0222	0.035408	5.5295	11.936
chrX	157486826	157487068	-1.10446	2.95345	0.0333252	5.28248	11.3583	-1.1101	3.0222	0.035408	5.5295	11.936
chr11	85724228	85724596	1.81285	3.6427	0.000947993	23.4112	6.66347	1.0249	4.07994	0.00910715	24.1238	11.8555
chr4	145267673	145268346	2.06351	3.51118	0.000442397	23.311	5.57677	1.0249	4.07994	0.00910715	24.1238	11.8555
chr5	90741928	90742472	1.11057	4.01118	0.00607144	23.6943	10.9731	1.0249	4.07994	0.00910715	24.1238	11.8555
chr9	59969272	59969726	1.11057	4.01118	0.00607144	23.6943	10.9731	1.0249	4.07994	0.00910715	24.1238	11.8555
chr10	45485632	45486858	1.65794	3.78112	0.00122449	24.4217	7.73903	1.07985	4.10716	0.00673929	25.056	11.8534
chr14	102995118	102995553	1.65794	3.78112	0.00122449	24.4217	7.73903	1.07985	4.10716	0.00673929	25.056	11.8534
chr16	95798163	95798988	1.86986	3.66993	0.000612246	24.3332	6.65756	1.07985	4.10716	0.00673929	25.056	11.8534
chr17	67354258	67355056	2.12052	3.53841	0.000276498	24.2291	5.57182	1.07985	4.10716	0.00673929	25.056	11.8534
chr16	84703226	84703700	1.52929	3.90368	0.00152653	25.4276	8.80932	1.1328	4.13339	0.00492487	25.9884	11.8514
chr3	50628127	50628893	2.48223	3.40368	2.21198e-05	25.0163	4.47709	1.1328	4.13339	0.00492487	25.9884	11.8514
chr7	46503352	46503743	1.36736	3.98864	0.00267143	25.4982	9.88306	1.1328	4.13339	0.00492487	25.9884	11.8514
chr3	84749181	84750022	1.76588	3.83267	0.000528415	26.2748	7.72603	1.1839	4.15871	0.00355685	26.9209	11.8495
chr5	24524600	24524859	1.5823	3.92899	0.00102747	26.3575	8.80205	1.1839	4.15871	0.00355685	26.9209	11.8495
chr1	59370358	59370663	1.07608	4.24593	0.00400634	27.5497	13.0673	1.23326	4.18316	0.00254061	27.8536	11.8477
chr7	114817252	114818047	1.07608	4.24593	0.00400634	27.5497	13.0673	1.23326	4.18316	0.00254061	27.8536	11.8477
chr8	113656132	113656477	-2.55135	1	0.046875	0.82607	4.84223	-3.58268	1.66096	0.00146484	0.91359	10.9458
chr5	97126067	97126306	-2.61916	2.08496	0.00476074	1.71165	10.5162	-2.57345	2.16096	0.00476074	1.83304	10.9108
chr17	5150673	5151099	-1.84474	2.29248	0.0268555	2.58491	9.28467	-1.98309	2.45345	0.0111084	2.75471	10.8904
chr17	57180410	57180695	-2.15152	2.45345	0.00694275	2.59851	11.5451	-1.98309	2.45345	0.0111084	2.75471	10.8904
chr5	44159939	44160387	-2.40217	2.58496	0.00259399	2.60968	13.7948	-1.98309	2.45345	0.0111084	2.75471	10.8904
chr5	107862869	107863268	-2.70895	2.74593	0.000543594	2.62342	17.1532	-1.98309	2.45345	0.0111084	2.75471	10.8904
chr9	112111697	112111981	-2.79768	2.79248	0.000317097	2.62741	18.269	-1.98309	2.45345	0.0111084	2.75471	10.8904
chr1	88465771	88466059	-1.22659	2.40368	0.0402832	3.45906	8.09467	-1.56422	2.66096	0.0208282	3.67782	10.876
chr10	82004894	82005135	-1.41017	2.5	0.0268555	3.46995	9.22204	-1.56422	2.66096	0.0208282	3.67782	10.876
chr13	89668092	89668434	-1.5721	2.58496	0.0174561	3.47958	10.3461	-1.56422	2.66096	0.0208282	3.67782	10.876
chr14	56462789	56463144	-2.27438	2.95345	0.00142694	3.52165	17.0374	-1.56422	2.66096	0.0208282	3.67782	10.876
chr18	12105565	12105824	-2.27438	2.95345	0.00142694	3.52165	17.0374	-1.56422	2.66096	0.0208282	3.67782	10.876
chr4	108370426	108370761	-1.71695	2.66096	0.0111084	3.48822	11.4672	-1.56422	2.66096	0.0208282	3.67782	10.876
chr9	88534032	88534485	-1.96761	2.79248	0.00583649	3.50321	13.7017	-1.56422	2.66096	0.0208282	3.67782	10.876
chr1	128141117	128141376	-1.23502	2.74593	0.0305481	4.37237	10.2919	-1.23932	2.82193	0.0333252	4.60202	10.8648
chr1	149833029	149833239	-1.74057	3.01118	0.00369644	4.41036	14.738	-1.23932	2.82193	0.0333252	4.60202	10.8648
chr1	173343880	173344207	-2.33281	3.32193	0.000111386	4.4553	22.4452	-1.23932	2.82193	0.0333252	4.60202	10.8648
chr1	193330176	193330527	-1.23502	2.74593	0.0305481	4.37237	10.2919	-1.23932	2.82193	0.0333252	4.60202	10.8648
chr10	107949986	107950221	-1.37987	2.82193	0.0208282	4.38322	11.4071	-1.23932	2.82193	0.0333252	4.60202	10.8648
chr11	113627887	113628127	-1.07309	2.66096	0.0436401	4.36027	9.17374	-1.23932	2.82193	0.0333252	4.60202	10.8648
chr15	25995597	25995821	-1.37987	2.82193	0.0208282	4.38322	11.4071	-1.23932	2.82193	0.0333252	4.60202	10.8648
chr15	38627581	38627862	-1.07309	2.66096	0.0436401	4.36027	9.17374	-1.23932	2.82193	0.0333252	4.60202	10.8648
chr16	75675924	75676355	-1.23502	2.74593	0.0305481	4.37237	10.2919	-1.23932	2.82193	0.0333252	4.60202	10.8648
chr17	6812520	6812828	-2.18796	3.24593	0.000316679	4.44426	20.2508	-1.23932	2.82193	0.0333252	4.60202	10.8648
chr19	24439718	24440116	-1.63053	2.95345	0.00583649	4.40207	13.63	-1.23932	2.82193	0.0333252	4.60202	10.8648
chr2	121431877	121432151	-1.63053	2.95345	0.00583649	4.40207	13.63	-1.23932	2.82193	0.0333252	4.60202	10.8648
chr3	30015298	30015602	-1.23502	2.74593	0.0305481	4.37237	10.2919	-1.23932	2.82193	0.0333252	4.60202	10.8648
chr3	32536602	32536907	-1.93731	3.11441	0.00142694	4.42524	16.9482	-1.23932	2.82193	0.0333252	4.60202	10.8648
chr3	86253147	86253414	-1.51091	2.89068	0.00907898	4.39306	12.5197	-1.23932	2.82193	0.0333252	4.60202	10.8648
chr3	135359448	135360540	-2.97898	3.66096	1.70393e-07	4.50484	35.5174	-1.23932	2.82193	0.0333252	4.60202	10.8648
chr4	34701567	34701893	-1.07309	2.66096	0.0436401	4.36027	9.17374	-1.23932	2.82193	0.0333252	4.60202	10.8648
chr4	126977533	126977942	-1.84246	3.06464	0.00231028	4.41806	15.844	-1.23932	2.82193	0.0333252	4.60202	10.8648
chr5	29752818	29753244	-1.37987	2.82193	0.0208282	4.38322	11.4071	-1.23932	2.82193	0.0333252	4.60202	10.8648
chr6	27887887	27888340	-2.10938	3.2047	0.000527799	4.43829	19.1515	-1.23932	2.82193	0.0333252	4.60202	10.8648
chr6	96803015	96803582	-2.2623	3.28493	0.0001885	4.44992	21.3487	-1.23932	2.82193	0.0333252	4.60202	10.8648
chr8	22029019	22029595	-1.63053	2.95345	0.00583649	4.40207	13.63	-1.23932	2.82193	0.0333252	4.60202	10.8648
chr8	128242437	128242812	-1.23502	2.74593	0.0305481	4.37237	10.2919	-1.23932	2.82193	0.0333252	4.60202	10.8648
chr16	18517998	18518503	1.13451	3.87744	0.00751021	21.7765	9.91897	1.04459	3.95345	0.0112653	22.2501	10.7865
chr8	105217968	105218481	1.29644	3.79248	0.00469388	21.7162	8.84133	1.04459	3.95345	0.0112653	22.2501	10.7865
chr9	14089701	14090260	1.48001	3.69616	0.00272548	21.6481	7.76051	1.04459	3.95345	0.0112653	22.2501	10.7865
chr2	65022318	65023190	1.54168	3.72561	0.00183674	22.5717	7.75306	1.10403	3.98289	0.00832654	23.1816	10.7844
chr6	52076015	52076507	2.31104	3.32193	0.000111386	22.2765	4.48904	1.10403	3.98289	0.00832654	23.1816	10.7844
chr17	36265875	36266314	1.41735	3.85022	0.0022449	23.5702	8.8247	1.16114	4.01118	0.00607144	24.1132	10.7825
chr19	11811985	11812361	2.06351	3.51118	0.000442397	23.311	5.57677	1.16114	4.01118	0.00607144	24.1132	10.7825
chr5	64075480	64075875	1.41735	3.85022	0.0022449	23.5702	8.8247	1.16114	4.01118	0.00607144	24.1132	10.7825
chr2	24366210	24366563	1.71287	3.80735	0.000808164	25.3479	7.73241	1.26904	4.06464	0.00311044	25.9769	10.7788
chr7	104646967	104647637	2.17546	3.56464	0.000171429	25.148	5.56705	1.26904	4.06464	0.00311044	25.9769	10.7788
chr16	96345161	96345650	1.01557	4.32732	0.00445533	28.5437	14.1187	1.41723	4.13806	0.00105129	28.7737	10.7737
chr9	87015285	87016225	1.61556	4.10716	0.000385471	30.1678	9.84493	1.50826	4.18316	0.000486643	30.6389	10.7706
chr16	97466643	97466885	-2.06172	1.79248	0.0351562	1.69539	7.078	-2.42285	2.08496	0.00805664	1.83215	9.82453
chr1	172594548	172594821	-1.66116	2.19616	0.0402832	2.5768	8.14965	-1.83249	2.37744	0.0174561	2.75337	9.80617
chr12	4942059	4942271	-1.66116	2.19616	0.0402832	2.5768	8.14965	-1.83249	2.37744	0.0174561	2.75337	9.80617
chr12	108363847	108364119	-1.66116	2.19616	0.0402832	2.5768	8.14965	-1.83249	2.37744	0.0174561	2.75337	9.80617
chr15	73442422	73442738	-1.66116	2.19616	0.0402832	2.5768	8.14965	-1.83249	2.37744	0.0174561	2.75337	9.80617
chr5	8727873	8728162	-1.84474	2.29248	0.0268555	2.58491	9.28467	-1.83249	2.37744	0.0174561	2.75337	9.80617
chr6	86107148	86107413	-2.95961	2.87744	0.00010556	2.6347	20.4957	-1.83249	2.37744	0.0174561	2.75337	9.80617
chr1	191172531	191172818	-1.22659	2.40368	0.0402832	3.45906	8.09467	-1.41362	2.58496	0.0305481	3.67604	9.79316
chr10	83041933	83042209	-1.22659	2.40368	0.0402832	3.45906	8.09467	-1.41362	2.58496	0.0305481	3.67604	9.79316
chr11	108135461	108135710	-1.22659	2.40368	0.0402832	3.45906	8.09467	-1.41362	2.58496	0.0305481	3.67604	9.79316
chr11	114844134	114844454	-2.36311	3	0.000872016	3.52701	18.1457	-1.41362	2.58496	0.0305481	3.67604	9.79316
chr12	26444104	26444380	-1.41017	2.5	0.0268555	3.46995	9.22204	-1.41362	2.58496	0.0305481	3.67604	9.79316
chr12	105836285	105836507	-1.5721	2.58496	0.0174561	3.47958	10.3461	-1.41362	2.58496	0.0305481	3.67604	9.79316
chr19	47367544	47367934	-1.5721	2.58496	0.0174561	3.47958	10.3461	-1.41362	2.58496	0.0305481	3.67604	9.79316
chr2	165070390	165070687	-1.84798	2.72972	0.00427246	3.49605	12.5856	-1.41362	2.58496	0.0305481	3.67604	9.79316
chr4	70356116	70356412	-1.22659	2.40368	0.0402832	3.45906	8.09467	-1.41362	2.58496	0.0305481	3.67604	9.79316
chr4	155933471	155933847	-1.84798	2.72972	0.00427246	3.49605	12.5856	-1.41362	2.58496	0.0305481	3.67604	9.79316
chr5	76040699	76041157	-1.5721	2.58496	0.0174561	3.47958	10.3461	-1.41362	2.58496	0.0305481	3.67604	9.79316
chr5	139978948	139979230	-1.71695	2.66096	0.0111084	3.48822	11.4672	-1.41362	2.58496	0.0305481	3.67604	9.79316
chr6	55950806	55951039	-1.5721	2.58496	0.0174561	3.47958	10.3461	-1.41362	2.58496	0.0305481	3.67604	9.79316
chr6	84506749	84506997	-1.96761	2.79248	0.00583649	3.50321	13.7017	-1.41362	2.58496	0.0305481	3.67604	9.79316
chr7	105527385	105527658	-1.22659	2.40368	0.0402832	3.45906	8.09467	-1.41362	2.58496	0.0305481	3.67604	9.79316
chrX	109071796	109072057	-1.71695	2.66096	0.0111084	3.48822	11.4672	-1.41362	2.58496	0.0305481	3.67604	9.79316
chr10	37014310	37014604	-1.51091	2.89068	0.00907898	4.39306	12.5197	-1.08872	2.74593	0.0458221	4.59978	9.78308
chr11	3943841	3944128	-1.23502	2.74593	0.0305481	4.37237	10.2919	-1.08872	2.74593	0.0458221	4.59978	9.78308
chr11	29238125	29238353	-2.02604	3.16096	0.000872016	4.43196	18.0507	-1.08872	2.74593	0.0458221	4.59978	9.78308
chr12	80531653	80531946	-1.23502	2.74593	0.0305481	4.37237	10.2919	-1.08872	2.74593	0.0458221	4.59978	9.78308
chr13	52850414	52850659	-1.07309	2.66096	0.0436401	4.36027	9.17374	-1.08872	2.74593	0.0458221	4.59978	9.78308
chr17	24773324	24773561	-1.07309	2.66096	0.0436401	4.36027	9.17374	-1.08872	2.74593	0.0458221	4.59978	9.78308
chr17	30339369	30339630	-1.07309	2.66096	0.0436401	4.36027	9.17374	-1.08872	2.74593	0.0458221	4.59978	9.78308
chr17	86107852	86108195	-1.51091	2.89068	0.00907898	4.39306	12.5197	-1.08872	2.74593	0.0458221	4.59978	9.78308
chr18	10168744	10169017	-1.23502	2.74593	0.0305481	4.37237	10.2919	-1.08872	2.74593	0.0458221	4.59978	9.78308
chr18	63187675	63188230	-2.33281	3.32193	0.000111386	4.4553	22.4452	-1.08872	2.74593	0.0458221	4.59978	9.78308
chr19	42583751	42584057	-2.39989	3.35712	3.81377e-05	4.46041	23.5404	-1.08872	2.74593	0.0458221	4.59978	9.78308
chr19	42584265	42584532	-2.18796	3.24593	0.000316679	4.44426	20.2508	-1.08872	2.74593	0.0458221	4.59978	9.78308
chr2	57318373	57318660	-1.63053	2.95345	0.00583649	4.40207	13.63	-1.08872	2.74593	0.0458221	4.59978	9.78308
chr2	73442065	73442456	-1.63053	2.95345	0.00583649	4.40207	13.63	-1.08872	2.74593	0.0458221	4.59978	9.78308
chr2	156235815	156236230	-1.84246	3.06464	0.00231028	4.41806	15.844	-1.08872	2.74593	0.0458221	4.59978	9.78308
chr3	157520518	157520940	-1.07309	2.66096	0.0436401	4.36027	9.17374	-1.08872	2.74593	0.0458221	4.59978	9.78308
chr4	11166547	11166855	-1.37987	2.82193	0.0208282	4.38322	11.4071	-1.08872	2.74593	0.0458221	4.59978	9.78308
chr5	21434197	21434485	-1.07309	2.66096	0.0436401	4.36027	9.17374	-1.08872	2.74593	0.0458221	4.59978	9.78308
chr5	147545704	147545981	-1.23502	2.74593	0.0305481	4.37237	10.2919	-1.08872	2.74593	0.0458221	4.59978	9.78308
chr6	41721347	41721832	-1.84246	3.06464	0.00231028	4.41806	15.844	-1.08872	2.74593	0.0458221	4.59978	9.78308
chr6	54876799	54877242	-1.23502	2.74593	0.0305481	4.37237	10.2919	-1.08872	2.74593	0.0458221	4.59978	9.78308
chr6	88676795	88677322	-2.33281	3.32193	0.000111386	4.4553	22.4452	-1.08872	2.74593	0.0458221	4.59978	9.78308
chr7	96773508	96773925	-2.69351	3.51118	2.38186e-06	4.48288	28.9992	-1.08872	2.74593	0.0458221	4.59978	9.78308
chr7	139616225	139616487	-1.37987	2.82193	0.0208282	4.38322	11.4071	-1.08872	2.74593	0.0458221	4.59978	9.78308
chrX	7915715	7916039	-1.37987	2.82193	0.0208282	4.38322	11.4071	-1.08872	2.74593	0.0458221	4.59978	9.78308
chr5	53450766	53451279	2.04767	3.19616	0.00126672	18.6356	4.50749	1.00077	3.78112	0.0186544	19.4474	9.71852
chr13	37289016	37289410	1.34858	3.63339	0.0057893	19.8035	7.77641	1.0685	3.81468	0.0139908	20.3778	9.71643
chr14	60072294	60072905	3.07088	2.72972	5.00679e-05	19.2283	2.2883	1.0685	3.81468	0.0139908	20.3778	9.71643
chr16	94177064	94177918	1.34858	3.63339	0.0057893	19.8035	7.77641	1.0685	3.81468	0.0139908	20.3778	9.71643
chr4	53594233	53594621	1.00307	3.81468	0.0139908	19.9209	9.9393	1.0685	3.81468	0.0139908	20.3778	9.71643
chr6	87384254	87384721	1.5605	3.5222	0.00330817	19.7318	6.68972	1.0685	3.81468	0.0139908	20.3778	9.71643
chr14	121435781	121436231	1.41572	3.66546	0.00399737	20.7253	7.76828	1.13323	3.84674	0.0103265	21.3085	9.71444
chr8	11419558	11420003	1.48001	3.69616	0.00272548	21.6481	7.76051	1.19519	3.87744	0.00751021	22.2393	9.71253
chr8	56615167	56615474	1.13451	3.87744	0.00751021	21.7765	9.91897	1.19519	3.87744	0.00751021	22.2393	9.71253
chr14	56204928	56205339	1.19617	3.90689	0.00538776	22.7056	9.90945	1.25463	3.90689	0.00538776	23.1703	9.7107
chr17	27228381	27228858	1.05132	3.98289	0.00832654	22.762	10.9832	1.25463	3.90689	0.00538776	23.1703	9.7107
chr17	29303098	29303398	1.41735	3.85022	0.0022449	23.5702	8.8247	1.31174	3.93518	0.00381633	24.1015	9.70894
chr7	134525066	134525872	1.09148	4.13339	0.00492487	25.6188	12.0224	1.41964	3.98864	0.00184945	25.9643	9.70562
chr13	40461459	40462051	2.58645	3.45345	7.32602e-06	26.8467	4.46982	1.52009	4.03841	0.000859898	27.8278	9.70254
chr2	38460327	38461195	1.12561	4.26958	0.00400634	28.49	13.0572	1.56783	4.06206	0.000578207	28.7597	9.70107
chr3	65897256	65897996	1.22005	4.31468	0.00207915	30.3727	13.038	1.65886	4.10716	0.000254908	30.624	9.69827
chr11	82794313	82794545	-3.32071	1.40368	0.00878906	0.83701	8.36306	-3.26372	1.5	0.00488281	0.91265	8.76565
chr1	16125607	16125853	-2.45723	2	0.0134277	1.70691	9.37367	-2.25449	2	0.0134277	1.83115	8.73766
chr17	8388516	8388784	-2.06172	1.79248	0.0351562	1.69539	7.078	-2.25449	2	0.0134277	1.83115	8.73766
chr1	38852247	38852670	-3.17154	2.98864	1.08965e-05	2.64427	23.8251	-1.66413	2.29248	0.0268555	2.75187	8.72133
chr1	55111173	55111483	-1.84474	2.29248	0.0268555	2.58491	9.28467	-1.66413	2.29248	0.0268555	2.75187	8.72133
chr1	105260219	105260664	-2.70895	2.74593	0.000543594	2.62342	17.1532	-1.66413	2.29248	0.0268555	2.75187	8.72133
chr11	57524628	57524920	-2.00667	2.37744	0.0174561	2.59208	10.4163	-1.66413	2.29248	0.0268555	2.75187	8.72133
chr11	121305330	121305762	-2.70895	2.74593	0.000543594	2.62342	17.1532	-1.66413	2.29248	0.0268555	2.75187	8.72133
chr15	74939465	74940192	-1.84474	2.29248	0.0268555	2.58491	9.28467	-1.66413	2.29248	0.0268555	2.75187	8.72133
chr16	96722218	96722446	-1.84474	2.29248	0.0268555	2.58491	9.28467	-1.66413	2.29248	0.0268555	2.75187	8.72133
chr2	33452184	33452465	-2.51222	2.6427	0.0015564	2.6146	14.9162	-1.66413	2.29248	0.0268555	2.75187	8.72133
chr2	114117119	114118177	-3.51705	3.16993	3.17581e-07	2.65996	30.4516	-1.66413	2.29248	0.0268555	2.75187	8.72133
chr3	96522248	96522473	-2.6141	2.69616	0.00092411	2.61917	16.0356	-1.66413	2.29248	0.0268555	2.75187	8.72133
chr4	107701174	107701432	-1.66116	2.19616	0.0402832	2.5768	8.14965	-1.66413	2.29248	0.0268555	2.75187	8.72133
chr6	8472703	8473148	-3.41124	3.11441	1.04657e-06	2.65514	28.2471	-1.66413	2.29248	0.0268555	2.75187	8.72133
chr9	67935617	67936200	-2.79768	2.79248	0.000317097	2.62741	18.269	-1.66413	2.29248	0.0268555	2.75187	8.72133
chr11	29222397	29222783	-2.52504	3.08496	0.000316679	3.53679	20.3574	-1.24527	2.5	0.0436401	3.67404	8.70976
chr12	116071058	116071383	-1.5721	2.58496	0.0174561	3.47958	10.3461	-1.24527	2.5	0.0436401	3.67404	8.70976
chr13	30534233	30534628	-1.71695	2.66096	0.0111084	3.48822	11.4672	-1.24527	2.5	0.0436401	3.67404	8.70976
chr15	53185194	53185610	-2.27438	2.95345	0.00142694	3.52165	17.0374	-1.24527	2.5	0.0436401	3.67404	8.70976
chr18	12913721	12914256	-2.07765	2.85022	0.00369644	3.50982	14.8156	-1.24527	2.5	0.0436401	3.67404	8.70976
chr18	54825494	54825897	-1.71695	2.66096	0.0111084	3.48822	11.4672	-1.24527	2.5	0.0436401	3.67404	8.70976
chr2	166060098	166060377	-1.22659	2.40368	0.0402832	3.45906	8.09467	-1.24527	2.5	0.0436401	3.67404	8.70976
chr3	10399928	10400239	-1.41017	2.5	0.0268555	3.46995	9.22204	-1.24527	2.5	0.0436401	3.67404	8.70976
chr3	67499010	67499705	-2.52504	3.08496	0.000316679	3.53679	20.3574	-1.24527	2.5	0.0436401	3.67404	8.70976
chr3	100532654	100532974	-1.5721	2.58496	0.0174561	3.47958	10.3461	-1.24527	2.5	0.0436401	3.67404	8.70976
chr3	118431431	118431689	-1.41017	2.5	0.0268555	3.46995	9.22204	-1.24527	2.5	0.0436401	3.67404	8.70976
chr3	145600798	145601155	-1.5721	2.58496	0.0174561	3.47958	10.3461	-1.24527	2.5	0.0436401	3.67404	8.70976
chr4	117259993	117260208	-1.41017	2.5	0.0268555	3.46995	9.22204	-1.24527	2.5	0.0436401	3.67404	8.70976
chr4	129762596	129762811	-1.84798	2.72972	0.00427246	3.49605	12.5856	-1.24527	2.5	0.0436401	3.67404	8.70976
chr5	30639598	30639882	-2.07765	2.85022	0.00369644	3.50982	14.8156	-1.24527	2.5	0.0436401	3.67404	8.70976
chr5	52641780	52642287	-2.27438	2.95345	0.00142694	3.52165	17.0374	-1.24527	2.5	0.0436401	3.67404	8.70976
chr5	106847120	106847352	-1.41017	2.5	0.0268555	3.46995	9.22204	-1.24527	2.5	0.0436401	3.67404	8.70976
chr5	143722149	143722672	-2.36311	3	0.000872016	3.52701	18.1457	-1.24527	2.5	0.0436401	3.67404	8.70976
chr8	91117506	91117861	-1.5721	2.58496	0.0174561	3.47958	10.3461	-1.24527	2.5	0.0436401	3.67404	8.70976
chr10	13087210	13087570	1.33905	3.41645	0.0103147	16.9824	6.71283	1.02341	3.62396	0.0174598	17.5776	8.64737
chr10	40354665	40354917	2.29199	2.91645	0.000543594	16.7077	3.41161	1.02341	3.62396	0.0174598	17.5776	8.64737
chr10	75121054	75121452	1.5897	3.28493	0.00601691	16.9097	5.61808	1.02341	3.62396	0.0174598	17.5776	8.64737
chr16	5132159	5132788	1.12712	3.52764	0.0161167	17.0441	7.80328	1.02341	3.62396	0.0174598	17.5776	8.64737
chr16	57092536	57092802	1.5897	3.28493	0.00601691	16.9097	5.61808	1.02341	3.62396	0.0174598	17.5776	8.64737
chr3	68683579	68684040	1.89648	3.12396	0.00313926	16.8211	4.51812	1.02341	3.62396	0.0174598	17.5776	8.64737
chr5	47276320	47277127	1.5897	3.28493	0.00601691	16.9097	5.61808	1.02341	3.62396	0.0174598	17.5776	8.64737
chr5	132352424	132353043	2.29199	2.91645	0.000543594	16.7077	3.41161	1.02341	3.62396	0.0174598	17.5776	8.64737
chr7	144653514	144654077	1.33905	3.41645	0.0103147	16.9824	6.71283	1.02341	3.62396	0.0174598	17.5776	8.64737
chr12	52832098	52832591	1.97396	3.16096	0.00200564	17.7279	4.51267	1.09809	3.66096	0.0128651	18.5071	8.64532
chr13	43719478	43720241	1.97396	3.16096	0.00200564	17.7279	4.51267	1.09809	3.66096	0.0128651	18.5071	8.64532
chr17	87572766	87573089	1.2046	3.56464	0.0116399	17.9628	7.79387	1.09809	3.66096	0.0128651	18.5071	8.64532
chr18	10826726	10827231	1.2046	3.56464	0.0116399	17.9628	7.79387	1.09809	3.66096	0.0128651	18.5071	8.64532
chr18	75405649	75406030	1.02102	3.66096	0.0174598	18.0194	8.87934	1.09809	3.66096	0.0128651	18.5071	8.64532
chr2	157970566	157971027	1.2046	3.56464	0.0116399	17.9628	7.79387	1.09809	3.66096	0.0128651	18.5071	8.64532
chr5	108376066	108376399	1.41653	3.45345	0.00716299	17.8978	6.70474	1.09809	3.66096	0.0128651	18.5071	8.64532
chr6	43295923	43296383	1.66719	3.32193	0.00401127	17.8212	5.6113	1.09809	3.66096	0.0128651	18.5071	8.64532
chr8	125391186	125391737	2.92691	2.66096	0.000163078	17.4411	2.29344	1.09809	3.66096	0.0128651	18.5071	8.64532
chr10	61175526	61176194	1.09472	3.69616	0.0128651	18.9421	8.86915	1.16913	3.69616	0.0128651	19.4368	8.64338
chr14	115393051	115393514	1.2783	3.59984	0.00827042	18.8826	7.78493	1.16913	3.69616	0.0128651	19.4368	8.64338
chr2	29426641	29427115	1.49023	3.48864	0.00490099	18.8143	6.69704	1.16913	3.69616	0.0128651	19.4368	8.64338
chr4	102629623	102630146	1.74089	3.35712	0.002639	18.7337	5.60486	1.16913	3.69616	0.0128651	19.4368	8.64338
chr8	79724616	79724984	2.04767	3.19616	0.00126672	18.6356	4.50749	1.16913	3.69616	0.0128651	19.4368	8.64338
chr2	68975799	68976167	1.165	3.72972	0.0093272	19.8658	8.85945	1.23686	3.72972	0.0093272	20.3668	8.64152
chr3	55787410	55788119	1.34858	3.63339	0.0057893	19.8035	7.77641	1.23686	3.72972	0.0093272	20.3668	8.64152
chr7	142525739	142526229	2.11794	3.22972	0.000791699	19.5444	4.50256	1.23686	3.72972	0.0093272	20.3668	8.64152
chr2	157424090	157424539	1.62765	3.55426	0.00220545	20.6503	6.68272	1.30158	3.76178	0.00666229	21.2969	8.63975
chr3	82999071	82999469	1.23215	3.76178	0.00666229	20.7905	8.85019	1.30158	3.76178	0.00666229	21.2969	8.63975
chr8	120751707	120752436	1.07022	3.84674	0.0103265	20.8482	9.92891	1.30158	3.76178	0.00666229	21.2969	8.63975
chr2	126322337	126323132	1.29644	3.79248	0.00469388	21.7162	8.84133	1.36355	3.79248	0.00469388	22.2272	8.63805
chr8	95760421	95760690	1.05132	3.98289	0.00832654	22.762	10.9832	1.42299	3.82193	0.00326531	23.1577	8.63643
chr17	5976974	5977422	1.09148	4.13339	0.00492487	25.6188	12.0224	1.58799	3.90368	0.00102747	25.9502	8.63191
chr12	83175868	83176278	-2.76401	2.16096	0.0027771	1.71589	11.6557	-2.06363	1.90368	0.0219727	1.83003	7.65017
chr16	93564193	93564487	-2.06172	1.79248	0.0351562	1.69539	7.078	-2.06363	1.90368	0.0219727	1.83003	7.65017
chr9	57728404	57728667	-2.61916	2.08496	0.00476074	1.71165	10.5162	-2.06363	1.90368	0.0219727	1.83003	7.65017
chr10	14450164	14450392	-2.00667	2.37744	0.0174561	2.59208	10.4163	-1.47327	2.19616	0.0402832	2.75018	7.63587
chr11	5496910	5497185	-2.15152	2.45345	0.00694275	2.59851	11.5451	-1.47327	2.19616	0.0402832	2.75018	7.63587
chr11	30643220	30643614	-1.84474	2.29248	0.0268555	2.58491	9.28467	-1.47327	2.19616	0.0402832	2.75018	7.63587
chr15	35573342	35573709	-1.84474	2.29248	0.0268555	2.58491	9.28467	-1.47327	2.19616	0.0402832	2.75018	7.63587
chr19	60417688	60417964	-2.00667	2.37744	0.0174561	2.59208	10.4163	-1.47327	2.19616	0.0402832	2.75018	7.63587
chr9	52119209	52119573	-2.51222	2.6427	0.0015564	2.6146	14.9162	-1.47327	2.19616	0.0402832	2.75018	7.63587
chr9	104569399	104569900	-1.84474	2.29248	0.0268555	2.58491	9.28467	-1.47327	2.19616	0.0402832	2.75018	7.63587
chr1	93046110	93046721	1.17103	3.33621	0.0203304	15.1551	6.73042	1.05233	3.44741	0.0219187	15.7096	7.575
chr2	148572234	148572490	1.42169	3.2047	0.0129375	15.0902	5.6328	1.05233	3.44741	0.0219187	15.7096	7.575
chr5	35739974	35740319	1.72847	3.04373	0.00739288	15.0112	4.52996	1.05233	3.44741	0.0219187	15.7096	7.575
chr7	43678412	43678831	1.17103	3.33621	0.0203304	15.1551	6.73042	1.05233	3.44741	0.0219187	15.7096	7.575
chr1	181616157	181616511	1.50803	3.24593	0.00889456	15.9993	5.62523	1.13555	3.48864	0.0161167	16.6381	7.573
chr10	61199580	61200006	1.04545	3.48864	0.0219187	16.1265	7.81322	1.13555	3.48864	0.0161167	16.6381	7.573
chr2	33796665	33797252	1.04545	3.48864	0.0219187	16.1265	7.81322	1.13555	3.48864	0.0161167	16.6381	7.573
chr2	33580209	33581165	1.5897	3.28493	0.00601691	16.9097	5.61808	1.21427	3.52764	0.0116399	17.5668	7.57111
chr7	49616156	49616804	1.12712	3.52764	0.0161167	17.0441	7.80328	1.21427	3.52764	0.0116399	17.5668	7.57111
chr9	78296027	78296526	1.33905	3.41645	0.0103147	16.9824	6.71283	1.21427	3.52764	0.0116399	17.5668	7.57111
chrX	50657747	50658154	1.5897	3.28493	0.00601691	16.9097	5.61808	1.21427	3.52764	0.0116399	17.5668	7.57111
chr10	109920730	109921078	1.66719	3.32193	0.00401127	17.8212	5.6113	1.28896	3.56464	0.0116399	18.4957	7.56932
chr18	60933459	60933929	2.36947	2.95345	0.000317097	17.6083	3.40749	1.28896	3.56464	0.0116399	18.4957	7.56932
chr19	23015561	23015869	1.2046	3.56464	0.0116399	17.9628	7.79387	1.28896	3.56464	0.0116399	18.4957	7.56932
chr4	32539000	32539364	1.97396	3.16096	0.00200564	17.7279	4.51267	1.28896	3.56464	0.0116399	18.4957	7.56932
chr6	34674942	34675210	1.02102	3.66096	0.0174598	18.0194	8.87934	1.28896	3.56464	0.0116399	18.4957	7.56932
chr7	30737516	30737820	1.49023	3.48864	0.00490099	18.8143	6.69704	1.35999	3.59984	0.00827042	19.4249	7.56762
chr13	72628424	72629335	2.11794	3.22972	0.000791699	19.5444	4.50256	1.42773	3.63339	0.0057893	20.3542	7.56599
chr4	119809143	119809570	1.34858	3.63339	0.0057893	19.8035	7.77641	1.42773	3.63339	0.0057893	20.3542	7.56599
chr10	83729544	83729842	1.48001	3.69616	0.00272548	21.6481	7.76051	1.55442	3.69616	0.00272548	22.2135	7.56295
chr1	159735138	159735425	-2.55135	1	0.046875	0.82607	4.84223	-2.85251	1.29248	0.015625	0.91144	6.58297
chr18	5114531	5114769	-2.27365	1.90368	0.0219727	1.70155	8.22777	-1.84329	1.79248	0.0351562	1.82872	6.56195
chr3	16152783	16153038	-2.06172	1.79248	0.0351562	1.69539	7.078	-1.84329	1.79248	0.0351562	1.82872	6.56195
chr1	34642364	34642791	1.23262	3.11441	0.0258751	13.2757	5.64941	1.09043	3.24593	0.0277233	13.8435	6.50123
chr12	17733661	17734011	1.9349	2.74593	0.00427246	13.1171	3.43063	1.09043	3.24593	0.0277233	13.8435	6.50123
chr18	4746132	4746444	1.9349	2.74593	0.00427246	13.1171	3.43063	1.09043	3.24593	0.0277233	13.8435	6.50123
chr7	49125588	49125831	1.23262	3.11441	0.0258751	13.2757	5.64941	1.09043	3.24593	0.0277233	13.8435	6.50123
chr1	6382731	6383342	1.63689	3	0.0110893	14.108	4.53643	1.1844	3.29248	0.0129375	14.7708	6.49929
chr10	19779585	19779838	1.63689	3	0.0110893	14.108	4.53643	1.1844	3.29248	0.0129375	14.7708	6.49929
chr10	119050003	119050546	1.63689	3	0.0110893	14.108	4.53643	1.1844	3.29248	0.0129375	14.7708	6.49929
chr11	115265325	115265534	1.07945	3.29248	0.0277233	14.2433	6.74003	1.1844	3.29248	0.0129375	14.7708	6.49929
chr18	65216238	65216512	1.07945	3.29248	0.0277233	14.2433	6.74003	1.1844	3.29248	0.0129375	14.7708	6.49929
chr4	130874659	130874961	1.33011	3.16096	0.0184822	14.1823	5.64084	1.1844	3.29248	0.0129375	14.7708	6.49929
chr5	136840087	136840375	1.33011	3.16096	0.0184822	14.1823	5.64084	1.1844	3.29248	0.0129375	14.7708	6.49929
chr6	42309891	42310340	1.63689	3	0.0110893	14.108	4.53643	1.1844	3.29248	0.0129375	14.7708	6.49929
chr7	16160581	16161035	1.63689	3	0.0110893	14.108	4.53643	1.1844	3.29248	0.0129375	14.7708	6.49929
chr9	84466787	84467079	1.33011	3.16096	0.0184822	14.1823	5.64084	1.1844	3.29248	0.0129375	14.7708	6.49929
chr1	142742371	142742661	1.42169	3.2047	0.0129375	15.0902	5.6328	1.27267	3.33621	0.00889456	15.6984	6.49747
chr14	7944720	7944961	1.17103	3.33621	0.0203304	15.1551	6.73042	1.27267	3.33621	0.00889456	15.6984	6.49747
chr2	179662390	179662668	2.12397	2.83621	0.0015564	14.9099	3.42055	1.27267	3.33621	0.00889456	15.6984	6.49747
chr7	107370467	107371220	1.17103	3.33621	0.0203304	15.1551	6.73042	1.27267	3.33621	0.00889456	15.6984	6.49747
chr8	54255487	54255820	1.72847	3.04373	0.00739288	15.0112	4.52996	1.27267	3.33621	0.00889456	15.6984	6.49747
chr1	37624246	37624591	1.25737	3.37744	0.0146125	16.0681	6.72138	1.35589	3.37744	0.00601691	16.6262	6.49576
chr1	58359568	58359926	1.81481	3.08496	0.00485158	15.9156	4.52387	1.35589	3.37744	0.00601691	16.6262	6.49576
chr6	39052198	39052724	1.50803	3.24593	0.00889456	15.9993	5.62523	1.35589	3.37744	0.00601691	16.6262	6.49576
chr9	30937119	30937363	1.81481	3.08496	0.00485158	15.9156	4.52387	1.35589	3.37744	0.00601691	16.6262	6.49576
chr12	44181225	44181657	1.5897	3.28493	0.00601691	16.9097	5.61808	1.43461	3.41645	0.00401127	17.5543	6.49414
chr18	52866158	52866677	1.5897	3.28493	0.00601691	16.9097	5.61808	1.43461	3.41645	0.00401127	17.5543	6.49414
chr2	78049174	78049616	1.89648	3.12396	0.00313926	16.8211	4.51812	1.43461	3.41645	0.00401127	17.5543	6.49414
chr7	142675694	142676153	1.12712	3.52764	0.0161167	17.0441	7.80328	1.43461	3.41645	0.00401127	17.5543	6.49414
chrX	164013346	164013699	1.33905	3.41645	0.0103147	16.9824	6.71283	1.43461	3.41645	0.00401127	17.5543	6.49414
chr13	117195696	117196331	1.2783	3.59984	0.00827042	18.8826	7.78493	1.58033	3.48864	0.002639	19.4111	6.49114
chr10	111378115	111378570	2.11794	3.22972	0.000791699	19.5444	4.50256	1.64807	3.5222	0.00171535	20.3398	6.48975
chr16	84879167	84879682	1.165	3.72972	0.0093272	19.8658	8.85945	1.64807	3.5222	0.00171535	20.3398	6.48975
chr6	27644923	27645522	1.48001	3.69616	0.00272548	21.6481	7.76051	1.77476	3.58496	0.000701733	22.1977	6.48714
chr19	58243512	58244013	1.05132	3.98289	0.00832654	22.762	10.9832	1.83419	3.61441	0.000442397	23.127	6.48592
chr12	73113186	73113621	1.60093	3.7539	0.00183674	23.4963	7.74591	1.8913	3.6427	0.000276498	24.0564	6.48475
chr6	140465977	140466617	1.86986	3.66993	0.000612246	24.3332	6.65756	1.94625	3.66993	0.000171429	24.986	6.48362
chr16	5406804	5407058	-3.50429	1.5	0.00268555	0.83965	9.5278	-2.59191	1.16096	0.046875	0.91068	5.49043
chr16	18533121	18533399	-2.55135	1	0.046875	0.82607	4.84223	-2.59191	1.16096	0.046875	0.91068	5.49043
chr3	94472812	94473086	-3.32071	1.40368	0.00878906	0.83701	8.36306	-2.59191	1.16096	0.046875	0.91068	5.49043
chrX	73452022	73452282	-3.32071	1.40368	0.00878906	0.83701	8.36306	-2.59191	1.16096	0.046875	0.91068	5.49043
chr11	87673364	87673638	1.20232	2.79248	0.0333252	10.5096	4.56724	1.02614	2.95345	0.0333252	11.0541	5.42783
chr4	124633330	124633609	1.20232	2.79248	0.0333252	10.5096	4.56724	1.02614	2.95345	0.0333252	11.0541	5.42783
chr4	136755315	136755784	3.1082	1.79248	0.00268555	10.1724	1.17967	1.02614	2.95345	0.0333252	11.0541	5.42783
chr16	10557417	10557809	1.32323	2.85022	0.0333252	11.4069	4.55864	1.14268	3.01118	0.0236053	11.9797	5.42583
chr19	29824185	29824643	1.32323	2.85022	0.0333252	11.4069	4.55864	1.14268	3.01118	0.0236053	11.9797	5.42583
chr3	97255015	97255418	2.27617	2.35022	0.00476074	11.2224	2.3168	1.14268	3.01118	0.0236053	11.9797	5.42583
chr4	106093309	106093578	1.32323	2.85022	0.0333252	11.4069	4.55864	1.14268	3.01118	0.0236053	11.9797	5.42583
chr6	113118729	113119056	2.27617	2.35022	0.00476074	11.2224	2.3168	1.14268	3.01118	0.0236053	11.9797	5.42583
chr7	34702817	34703109	1.32323	2.85022	0.0333252	11.4069	4.55864	1.14268	3.01118	0.0236053	11.9797	5.42583
chr7	46002821	46003052	1.32323	2.85022	0.0333252	11.4069	4.55864	1.14268	3.01118	0.0236053	11.9797	5.42583
chr9	23250082	23250382	1.32323	2.85022	0.0333252	11.4069	4.55864	1.14268	3.01118	0.0236053	11.9797	5.42583
chrX	53610644	53610913	1.71874	2.6427	0.0111084	11.33	3.4422	1.14268	3.01118	0.0236053	11.9797	5.42583
chr1	120474586	120475210	1.1284	3.06464	0.035408	12.3706	5.65859	1.25058	3.06464	0.0163422	12.9057	5.42398
chr1	137010235	137011019	1.43518	2.90368	0.0236053	12.3058	4.5507	1.25058	3.06464	0.0163422	12.9057	5.42398
chr15	85328535	85328796	1.83068	2.69616	0.00694275	12.2228	3.43621	1.25058	3.06464	0.0163422	12.9057	5.42398
chr17	10959519	10959914	1.1284	3.06464	0.035408	12.3706	5.65859	1.25058	3.06464	0.0163422	12.9057	5.42398
chr17	46428790	46429222	1.1284	3.06464	0.035408	12.3706	5.65859	1.25058	3.06464	0.0163422	12.9057	5.42398
chr2	60810658	60810985	2.38812	2.40368	0.0027771	12.1067	2.31276	1.25058	3.06464	0.0163422	12.9057	5.42398
chr5	118427717	118428106	1.1284	3.06464	0.035408	12.3706	5.65859	1.25058	3.06464	0.0163422	12.9057	5.42398
chr8	54660764	54661050	1.43518	2.90368	0.0236053	12.3058	4.5507	1.25058	3.06464	0.0163422	12.9057	5.42398
chr7	102636722	102637030	1.23262	3.11441	0.0258751	13.2757	5.64941	1.35104	3.11441	0.0110893	13.8319	5.42225
chr17	5995931	5996266	1.33011	3.16096	0.0184822	14.1823	5.64084	1.445	3.16096	0.00739288	14.7584	5.42064
chr3	85812078	85812470	1.07945	3.29248	0.0277233	14.2433	6.74003	1.445	3.16096	0.00739288	14.7584	5.42064
chr8	87958790	87959232	1.33011	3.16096	0.0184822	14.1823	5.64084	1.445	3.16096	0.00739288	14.7584	5.42064
chr2	36172013	36172387	1.17103	3.33621	0.0203304	15.1551	6.73042	1.53327	3.2047	0.00485158	15.6852	5.41912
chr2	119986432	119986804	1.42169	3.2047	0.0129375	15.0902	5.6328	1.53327	3.2047	0.00485158	15.6852	5.41912
chr18	13315067	13315719	1.50803	3.24593	0.00889456	15.9993	5.62523	1.6165	3.24593	0.00313926	16.6122	5.41769
chr19	56919503	56919941	1.25737	3.37744	0.0146125	16.0681	6.72138	1.6165	3.24593	0.00313926	16.6122	5.41769
chr19	45310981	45311251	1.5897	3.28493	0.00601691	16.9097	5.61808	1.69522	3.28493	0.00200564	17.5395	5.41634
chr6	50029943	50030279	1.89648	3.12396	0.00313926	16.8211	4.51812	1.69522	3.28493	0.00200564	17.5395	5.41634
chr17	7222253	7222577	1.5605	3.5222	0.00330817	19.7318	6.68972	1.90868	3.39068	0.000791699	20.3227	5.41268
chr19	25042889	25043331	1.41572	3.66546	0.00399737	20.7253	7.76828	1.9734	3.42275	0.000490099	21.2508	5.41157
chr5	147945154	147945640	1.11057	4.01118	0.00607144	23.6943	10.9731	2.15191	3.51118	0.000110599	24.0362	5.40851
chrX	169972850	169973573	2.93075	3.22147	3.40305e-06	25.7562	3.37783	2.3109	3.58995	2.34433e-05	26.8231	5.40578
chr1	150307700	150307923	1.32241	2.45345	0.0268555	8.66171	3.46352	1.07963	2.66096	0.0436401	9.19456	4.3504
chr12	72427691	72428118	1.87985	2.16096	0.0134277	8.57947	2.33115	1.07963	2.66096	0.0436401	9.19456	4.3504
chr13	9136800	9137062	1.87985	2.16096	0.0134277	8.57947	2.33115	1.07963	2.66096	0.0436401	9.19456	4.3504
chr14	106439332	106439616	1.32241	2.45345	0.0268555	8.66171	3.46352	1.07963	2.66096	0.0436401	9.19456	4.3504
chr15	57644338	57644636	1.32241	2.45345	0.0268555	8.66171	3.46352	1.07963	2.66096	0.0436401	9.19456	4.3504
chr17	12461240	12461480	1.32241	2.45345	0.0268555	8.66171	3.46352	1.07963	2.66096	0.0436401	9.19456	4.3504
chr2	72777411	72777656	1.32241	2.45345	0.0268555	8.66171	3.46352	1.07963	2.66096	0.0436401	9.19456	4.3504
chr4	54511761	54512081	2.83279	1.66096	0.00878906	8.44068	1.18474	1.07963	2.66096	0.0436401	9.19456	4.3504
chr4	150743137	150743413	1.32241	2.45345	0.0268555	8.66171	3.46352	1.07963	2.66096	0.0436401	9.19456	4.3504
chr13	117128224	117128484	1.46639	2.5222	0.0174561	9.54927	3.45576	1.2184	2.72972	0.0305481	10.1185	4.34849
chr2	106355950	106356236	2.02382	2.22972	0.0134277	9.4586	2.32592	1.2184	2.72972	0.0305481	10.1185	4.34849
chr4	34680441	34680833	1.07088	2.72972	0.0458221	9.61413	4.5766	1.2184	2.72972	0.0305481	10.1185	4.34849
chr6	113822487	113822727	1.46639	2.5222	0.0174561	9.54927	3.45576	1.2184	2.72972	0.0305481	10.1185	4.34849
chr6	137143713	137144058	1.46639	2.5222	0.0174561	9.54927	3.45576	1.2184	2.72972	0.0305481	10.1185	4.34849
chr12	40415404	40415643	3.1082	1.79248	0.00268555	10.1724	1.17967	1.34509	2.79248	0.0208282	11.0428	4.34674
chr13	53118447	53118844	1.20232	2.79248	0.0333252	10.5096	4.56724	1.34509	2.79248	0.0208282	11.0428	4.34674
chr15	44410512	44410757	1.20232	2.79248	0.0333252	10.5096	4.56724	1.34509	2.79248	0.0208282	11.0428	4.34674
chr6	87254792	87255057	1.59783	2.58496	0.0174561	10.4387	3.44869	1.34509	2.79248	0.0208282	11.0428	4.34674
chr1	80447608	80447902	1.32323	2.85022	0.0333252	11.4069	4.55864	1.46164	2.85022	0.0138855	11.9674	4.34514
chr12	55536652	55537069	1.01645	3.01118	0.0472107	11.467	5.66847	1.46164	2.85022	0.0138855	11.9674	4.34514
chr13	52798844	52799187	1.01645	3.01118	0.0472107	11.467	5.66847	1.46164	2.85022	0.0138855	11.9674	4.34514
chr14	75456813	75457429	1.71874	2.6427	0.0111084	11.33	3.4422	1.46164	2.85022	0.0138855	11.9674	4.34514
chr16	10907946	10908196	1.71874	2.6427	0.0111084	11.33	3.4422	1.46164	2.85022	0.0138855	11.9674	4.34514
chr6	37037109	37037379	1.71874	2.6427	0.0111084	11.33	3.4422	1.46164	2.85022	0.0138855	11.9674	4.34514
chr1	106544772	106545191	1.43518	2.90368	0.0236053	12.3058	4.5507	1.56954	2.90368	0.00907898	12.8924	4.34365
chr18	78432719	78432988	1.1284	3.06464	0.035408	12.3706	5.65859	1.56954	2.90368	0.00907898	12.8924	4.34365
chr5	119875346	119875924	1.1284	3.06464	0.035408	12.3706	5.65859	1.56954	2.90368	0.00907898	12.8924	4.34365
chr6	100403511	100403971	2.38812	2.40368	0.0027771	12.1067	2.31276	1.56954	2.90368	0.00907898	12.8924	4.34365
chr8	125385571	125386091	1.1284	3.06464	0.035408	12.3706	5.65859	1.56954	2.90368	0.00907898	12.8924	4.34365
chr14	55271231	55271471	1.23262	3.11441	0.0258751	13.2757	5.64941	1.66999	2.95345	0.00583649	13.8177	4.34227
chr4	40677222	40677535	1.23262	3.11441	0.0258751	13.2757	5.64941	1.66999	2.95345	0.00583649	13.8177	4.34227
chr10	123175694	123176109	1.42169	3.2047	0.0129375	15.0902	5.6328	1.85223	3.04373	0.00231028	15.6691	4.33976
chr11	115329280	115329675	1.72847	3.04373	0.00739288	15.0112	4.52996	1.85223	3.04373	0.00231028	15.6691	4.33976
chr2	53051486	53051887	1.17103	3.33621	0.0203304	15.1551	6.73042	1.85223	3.04373	0.00231028	15.6691	4.33976
chr1	52328586	52328882	1.2783	3.59984	0.00827042	18.8826	7.78493	2.1599	3.19616	0.000527799	19.3748	4.33553
chr17	69349033	69349597	2.04767	3.19616	0.00126672	18.6356	4.50749	2.1599	3.19616	0.000527799	19.3748	4.33553
chr8	119887220	119887526	1.2783	3.59984	0.00827042	18.8826	7.78493	2.1599	3.19616	0.000527799	19.3748	4.33553
chr1	119421009	119421287	1.16326	2.37744	0.0402832	7.77624	3.47212	1.33743	2.37744	0.0402832	8.26011	3.26872
chr2	50306676	50306933	1.16326	2.37744	0.0402832	7.77624	3.47212	1.33743	2.37744	0.0402832	8.26011	3.26872
chr3	148277272	148277698	1.72069	2.08496	0.0219727	7.7024	2.33693	1.33743	2.37744	0.0402832	8.26011	3.26872
chr2	72236410	72236800	1.87985	2.16096	0.0134277	8.57947	2.33115	1.49084	2.45345	0.0268555	9.18236	3.26713
chr8	65110487	65110731	1.32241	2.45345	0.0268555	8.66171	3.46352	1.49084	2.45345	0.0268555	9.18236	3.26713
chr11	105558909	105559207	1.07088	2.72972	0.0458221	9.61413	4.5766	1.62961	2.5222	0.0174561	10.105	3.2657
chr9	53033876	53034135	1.07088	2.72972	0.0458221	9.61413	4.5766	1.62961	2.5222	0.0174561	10.105	3.2657
chrX	73663195	73663459	1.59783	2.58496	0.0174561	10.4387	3.44869	1.7563	2.58496	0.0111084	11.0281	3.26439
chrX	94689608	94690323	1.20232	2.79248	0.0333252	10.5096	4.56724	1.7563	2.58496	0.0111084	11.0281	3.26439
chr1	90203801	90204142	1.01645	3.01118	0.0472107	11.467	5.66847	1.87284	2.6427	0.00694275	11.9515	3.26318
chr10	4250648	4251067	2.27617	2.35022	0.00476074	11.2224	2.3168	1.87284	2.6427	0.00694275	11.9515	3.26318
chr2	70553874	70554111	1.32323	2.85022	0.0333252	11.4069	4.55864	1.87284	2.6427	0.00694275	11.9515	3.26318
chr3	103011216	103011565	1.71874	2.6427	0.0111084	11.33	3.4422	1.87284	2.6427	0.00694275	11.9515	3.26318
chr3	52758631	52758985	1.5394	2.95345	0.0163422	13.2062	4.54332	2.0812	2.74593	0.00259399	13.7993	3.26103
chr5	33541927	33542204	1.9349	2.74593	0.00427246	13.1171	3.43063	2.0812	2.74593	0.00259399	13.7993	3.26103
chr11	61169008	61169492	1.72847	3.04373	0.00739288	15.0112	4.52996	2.26344	2.83621	0.00092411	15.6483	3.25914
chr17	49530239	49530550	1.72069	2.08496	0.0219727	7.7024	2.33693	1.917	2.08496	0.0219727	8.24467	2.18323
chr10	111636354	111636625	1.87985	2.16096	0.0134277	8.57947	2.33115	2.0704	2.16096	0.0134277	9.1652	2.18217
chr6	58916538	58916849	1.46639	2.5222	0.0174561	9.54927	3.45576	2.20918	2.22972	0.00805664	10.0861	2.18121
chr5	98348705	98349000	1.20232	2.79248	0.0333252	10.5096	4.56724	2.33587	2.29248	0.00476074	11.0075	2.18033
chr5	115174422	115174892	1.20232	2.79248	0.0333252	10.5096	4.56724	2.33587	2.29248	0.00476074	11.0075	2.18033
chr17	85458114	85458356	1.72069	2.08496	0.0219727	7.7024	2.33693	2.90777	1.58496	0.00878906	8.21835	1.09511
chr4	6818398	6818748	2.67363	1.58496	0.00878906	7.5778	1.18768	2.90777	1.58496	0.00878906	8.21835	1.09511
chr8	81491262	81491654	1.32323	2.85022	0.0333252	11.4069	4.55864	3.44318	1.85022	0.000793457	11.8911	1.09325

## Sheet: acute_peakswScore
chr	start	end	Day0vsDay7_M_value	Day0vsDay7_A_value	Day0vsDay7_p_value	normalized_read_density_Day_0	normalized_read_density_Day7	Day0vsDay35_M_value	Day0vsDay35_A_value	Day0vsDay35_p_value	normalized_read_density_Day_0	normalized_read_density_Day35
chr6	28431330	28431709	-1.00263	3.13339	0.035408	6.19917	12.421	2.54185	1.40368	0.0273438	6.38464	1.09638
chr2	106734089	106734389	-1.35283	3.85712	0.00326531	9.06751	23.1596	2.0704	2.16096	0.0134277	9.1652	2.18217
chr1	127765511	127765808	-1.01034	3.95345	0.0112653	10.9153	21.9876	1.7563	2.58496	0.0111084	11.0281	3.26439
chr1	59497772	59498769	-1.14245	5.00771	0.00036358	21.6528	47.7997	1.71279	3.55426	0.00110272	21.2687	6.48842
chrX	160891964	160892534	-1.13321	4.45345	0.00267028	14.793	32.4478	1.445	3.16096	0.00739288	14.7584	5.42064
chr17	68118617	68119097	1.07608	4.24593	0.00400634	27.5497	13.0673	0.99447	4.30367	0.00600951	27.875	13.991
chrX	12157552	12157906	1.1957	4.18316	0.00355685	27.4934	12.0029	0.99447	4.30367	0.00600951	27.875	13.991
chr1	151040638	151041580	1.15429	4.91645	0.000384073	45.0542	20.2423	0.99331	4.98864	0.00135857	44.7959	22.5021
chr12	45171977	45172277	1.43518	2.90368	0.0236053	12.3058	4.5507	0.98997	3.19616	0.0369644	12.9165	6.5033
chr18	59078118	59078499	1.83068	2.69616	0.00694275	12.2228	3.43621	0.98997	3.19616	0.0369644	12.9165	6.5033
chr3	103998755	103999070	1.43518	2.90368	0.0236053	12.3058	4.5507	0.98997	3.19616	0.0369644	12.9165	6.5033
chr4	55477964	55478327	1.43518	2.90368	0.0236053	12.3058	4.5507	0.98997	3.19616	0.0369644	12.9165	6.5033
chr4	82361602	82361925	1.1284	3.06464	0.035408	12.3706	5.65859	0.98997	3.19616	0.0369644	12.9165	6.5033
chr9	45048587	45049025	1.1284	3.06464	0.035408	12.3706	5.65859	0.98997	3.19616	0.0369644	12.9165	6.5033
chr7	134523917	134524706	1.29029	4.90689	0.000117247	46.9169	19.1829	0.98625	5.05164	0.00112236	46.6812	23.5641
chr1	172481264	172482479	1.29301	5.41486	6.91185e-06	66.781	27.2533	0.98596	5.54174	0.000155756	65.5589	33.1
chr7	105726269	105726912	1.06909	4.72251	0.00147332	38.2411	18.2264	0.98414	4.76374	0.00220998	38.2082	19.3152
chr9	61299704	61300926	1.24117	4.63222	0.000585502	38.1287	16.1296	0.98414	4.76374	0.00220998	38.2082	19.3152
chr1	74268779	74269201	1.23215	3.76178	0.00666229	20.7905	8.85019	0.98263	3.92275	0.0150204	21.3189	10.7886
chr10	126330484	126331033	2.18509	3.26178	0.000316679	20.4542	4.49786	0.98263	3.92275	0.0150204	21.3189	10.7886
chr13	107955376	107956131	1.41572	3.66546	0.00399737	20.7253	7.76828	0.98263	3.92275	0.0150204	21.3189	10.7886
chr18	55549698	55549983	2.18509	3.26178	0.000316679	20.4542	4.49786	0.98263	3.92275	0.0150204	21.3189	10.7886
chr7	28291127	28291546	1.87831	3.42275	0.00110272	20.5619	5.59288	0.98263	3.92275	0.0150204	21.3189	10.7886
chr14	56964073	56964750	1.91458	3.90368	0.000140455	29.0601	7.70816	0.98251	4.40368	0.00490086	29.7524	15.0576
chr2	31594168	31594642	1.22439	4.71313	0.000484496	40.0943	17.1595	0.9762	4.8371	0.00181792	40.0908	20.3788
chr11	114535882	114536443	1.19462	5.0736	0.000135734	50.9465	22.2586	0.97393	5.16993	0.00101724	50.4539	25.6868
chr3	27938119	27939413	1.76519	5.05492	2.27715e-07	61.2871	18.0299	0.97338	5.44017	0.000300919	60.8366	30.9847
chr13	80962760	80963229	1.82258	4.04373	0.000124346	31.0178	8.76917	0.97217	4.49718	0.00400542	31.6308	16.1235
chr3	139844321	139844946	1.1551	4.39395	0.00237138	31.3741	14.088	0.97217	4.49718	0.00400542	31.6308	16.1235
chr13	91442015	91442399	-1.2323	3.2539	0.0129375	6.22359	14.6218	0.97152	2.19616	0.0820313	6.41708	3.27251
chr1	152088812	152089397	1.31663	5.06464	4.00897e-05	52.818	21.2049	0.96854	5.22561	0.000842572	52.3411	26.7476
chr1	64302567	64303340	1.3581	3.82193	0.00326531	22.6428	8.83284	0.9678	4.05164	0.0121429	23.1918	11.8576
chr1	137560332	137560966	1.75361	3.61441	0.00145359	22.49	6.66963	0.9678	4.05164	0.0121429	23.1918	11.8576
chr10	24298522	24299040	1.05132	3.98289	0.00832654	22.762	10.9832	0.9678	4.05164	0.0121429	23.1918	11.8576
chr10	63282343	63283012	-1.18857	5.15814	0.000130803	23.6515	53.9079	0.9678	4.05164	0.0121429	23.1918	11.8576
chr12	91675948	91676266	1.3581	3.82193	0.00326531	22.6428	8.83284	0.9678	4.05164	0.0121429	23.1918	11.8576
chr6	54429394	54430164	1.75361	3.61441	0.00145359	22.49	6.66963	0.9678	4.05164	0.0121429	23.1918	11.8576
chr7	130631468	130632253	1.3581	3.82193	0.00326531	22.6428	8.83284	0.9678	4.05164	0.0121429	23.1918	11.8576
chr11	69192917	69193233	1.63689	3	0.0110893	14.108	4.53643	0.96406	3.40368	0.029225	14.7813	7.57712
chr15	25354754	25355269	2.03239	2.79248	0.00259399	14.0129	3.42543	0.96406	3.40368	0.029225	14.7813	7.57712
chr17	43232897	43233208	1.07945	3.29248	0.0277233	14.2433	6.74003	0.96406	3.40368	0.029225	14.7813	7.57712
chr2	49742440	49742716	1.07945	3.29248	0.0277233	14.2433	6.74003	0.96406	3.40368	0.029225	14.7813	7.57712
chr3	142356551	142356982	1.33011	3.16096	0.0184822	14.1823	5.64084	0.96406	3.40368	0.029225	14.7813	7.57712
chr7	31041804	31042347	1.33011	3.16096	0.0184822	14.1823	5.64084	0.96406	3.40368	0.029225	14.7813	7.57712
chr3	75730885	75731889	1.17749	5.19077	9.39402e-05	54.9299	24.2855	0.96357	5.27921	0.000698358	54.2291	27.808
chr11	103332377	103333086	1.04471	4.53841	0.00297372	33.3766	16.179	0.96314	4.58496	0.00327984	33.5103	17.1888
chr3	79221398	79222123	1.24145	4.43518	0.00121376	33.2644	14.0691	0.96314	4.58496	0.00327984	33.5103	17.1888
chr13	52577334	52577907	1.2287	5.21523	4.76764e-05	56.8693	24.2662	0.95898	5.33089	0.000579183	56.1176	28.868
chr1	88475358	88475818	1.16758	4.03841	0.00437143	24.6275	10.9634	0.95548	4.16993	0.00984974	25.0661	12.9258
chr11	98296288	98296636	1.03654	4.10716	0.00673929	24.6828	12.0327	0.95548	4.16993	0.00984974	25.0661	12.9258
chr12	100681314	100682104	1.03654	4.10716	0.00673929	24.6828	12.0327	0.95548	4.16993	0.00984974	25.0661	12.9258
chr18	61051594	61051931	1.47436	3.87744	0.0022449	24.4985	8.81686	0.95548	4.16993	0.00984974	25.0661	12.9258
chr3	28229566	28229996	1.16758	4.03841	0.00437143	24.6275	10.9634	0.95548	4.16993	0.00984974	25.0661	12.9258
chr15	51918001	51918855	1.22124	4.52764	0.000999569	35.2184	15.1057	0.95521	4.6677	0.003587	35.3907	18.2534
chr10	74925317	74925747	1.14449	4.15871	0.00355685	26.5557	12.0125	0.94511	4.27921	0.00801268	26.9416	13.9932
chr11	121192678	121193230	1.02487	4.22147	0.00547208	26.6102	13.0777	0.94511	4.27921	0.00801268	26.9416	13.9932
chr15	8629284	8629506	1.14449	4.15871	0.00355685	26.5557	12.0125	0.94511	4.27921	0.00801268	26.9416	13.9932
chr15	103347258	103347542	1.02487	4.22147	0.00547208	26.6102	13.0777	0.94511	4.27921	0.00801268	26.9416	13.9932
chr2	116064092	116064320	1.42037	4.01395	0.00184945	26.4306	9.8749	0.94511	4.27921	0.00801268	26.9416	13.9932
chr6	97487419	97488153	1.27552	4.08995	0.00311044	26.4962	10.945	0.94511	4.27921	0.00801268	26.9416	13.9932
chr1	167487356	167487617	1.81481	3.08496	0.00485158	15.9156	4.52387	0.94468	3.58496	0.0232797	16.6483	8.64953
chr1	184908518	184909095	1.04545	3.48864	0.0219187	16.1265	7.81322	0.94468	3.58496	0.0232797	16.6483	8.64953
chr10	96722544	96722861	1.25737	3.37744	0.0146125	16.0681	6.72138	0.94468	3.58496	0.0232797	16.6483	8.64953
chr12	84750696	84751097	1.50803	3.24593	0.00889456	15.9993	5.62523	0.94468	3.58496	0.0232797	16.6483	8.64953
chr12	100422310	100422764	1.25737	3.37744	0.0146125	16.0681	6.72138	0.94468	3.58496	0.0232797	16.6483	8.64953
chr17	43801166	43801462	1.04545	3.48864	0.0219187	16.1265	7.81322	0.94468	3.58496	0.0232797	16.6483	8.64953
chr19	57724968	57725303	1.25737	3.37744	0.0146125	16.0681	6.72138	0.94468	3.58496	0.0232797	16.6483	8.64953
chr2	13855448	13855854	1.50803	3.24593	0.00889456	15.9993	5.62523	0.94468	3.58496	0.0232797	16.6483	8.64953
chr3	109467315	109467858	1.25737	3.37744	0.0146125	16.0681	6.72138	0.94468	3.58496	0.0232797	16.6483	8.64953
chr3	131019390	131020056	1.25737	3.37744	0.0146125	16.0681	6.72138	0.94468	3.58496	0.0232797	16.6483	8.64953
chr4	8838505	8838957	1.50803	3.24593	0.00889456	15.9993	5.62523	0.94468	3.58496	0.0232797	16.6483	8.64953
chr7	3448821	3449478	1.04545	3.48864	0.0219187	16.1265	7.81322	0.94468	3.58496	0.0232797	16.6483	8.64953
chr9	45429993	45430473	1.25737	3.37744	0.0146125	16.0681	6.72138	0.94468	3.58496	0.0232797	16.6483	8.64953
chr9	75025751	75026043	1.25737	3.37744	0.0146125	16.0681	6.72138	0.94468	3.58496	0.0232797	16.6483	8.64953
chrX	159321419	159321670	1.50803	3.24593	0.00889456	15.9993	5.62523	0.94468	3.58496	0.0232797	16.6483	8.64953
chr12	85640524	85641674	1.52268	5.29436	6.36448e-07	66.519	23.1513	0.94058	5.56464	0.000229053	65.5685	34.1628
chr8	84798888	84801173	1.09627	5.51809	4.95939e-05	67.0062	31.3404	0.94058	5.56464	0.000229053	65.5685	34.1628
chr17	25570601	25571255	1.09718	4.81468	0.000886792	41.1628	19.2406	0.93636	4.89068	0.00199634	41.0372	21.444
chr5	110979999	110980468	1.86662	3.88078	0.000220173	28.131	7.71392	0.93629	4.38078	0.00653448	28.8184	15.0598
chr1	40479482	40480495	1.2046	3.56464	0.0116399	17.9628	7.79387	0.92973	3.74593	0.0186544	18.5172	9.7207
chr13	63072386	63072759	1.2046	3.56464	0.0116399	17.9628	7.79387	0.92973	3.74593	0.0186544	18.5172	9.7207
chr17	53617302	53617934	1.41653	3.45345	0.00716299	17.8978	6.70474	0.92973	3.74593	0.0186544	18.5172	9.7207
chr18	31848732	31849593	1.2046	3.56464	0.0116399	17.9628	7.79387	0.92973	3.74593	0.0186544	18.5172	9.7207
chr19	11793584	11794216	1.97396	3.16096	0.00200564	17.7279	4.51267	0.92973	3.74593	0.0186544	18.5172	9.7207
chr4	9874662	9875148	1.41653	3.45345	0.00716299	17.8978	6.70474	0.92973	3.74593	0.0186544	18.5172	9.7207
chrX	142249948	142250642	1.02102	3.66096	0.0174598	18.0194	8.87934	0.92973	3.74593	0.0186544	18.5172	9.7207
chr10	20204684	20205258	1.00812	4.42587	0.00490086	30.4831	15.156	0.9287	4.47564	0.00534056	30.6963	16.1257
chr13	102698676	102699405	1.00812	4.42587	0.00490086	30.4831	15.156	0.9287	4.47564	0.00534056	30.6963	16.1257
chr13	116309409	116310217	1.11001	4.37242	0.00326724	30.43	14.0979	0.9287	4.47564	0.00534056	30.6963	16.1257
chr1	21411253	21411515	1.16326	2.37744	0.0402832	7.77624	3.47212	0.92623	2.58496	0.0604248	8.27108	4.35251
chr1	133285969	133286252	-1.04941	3.53841	0.0161167	8.07636	16.7155	0.92623	2.58496	0.0604248	8.27108	4.35251
chr1	187137515	187137766	1.16326	2.37744	0.0402832	7.77624	3.47212	0.92623	2.58496	0.0604248	8.27108	4.35251
chr17	82857593	82857855	1.16326	2.37744	0.0402832	7.77624	3.47212	0.92623	2.58496	0.0604248	8.27108	4.35251
chr2	64098151	64098415	1.16326	2.37744	0.0402832	7.77624	3.47212	0.92623	2.58496	0.0604248	8.27108	4.35251
chr3	94764543	94764827	-1.22148	3.62869	0.00827042	8.10018	18.8885	0.92623	2.58496	0.0604248	8.27108	4.35251
chr4	8598479	8598814	-1.30006	3.66993	0.0057893	8.11108	19.9727	0.92623	2.58496	0.0604248	8.27108	4.35251
chr6	114145604	114146181	-1.13813	3.58496	0.0116399	8.08863	17.8028	0.92623	2.58496	0.0604248	8.27108	4.35251
chr14	45011253	45011828	1.42856	4.29436	0.000599433	32.1921	11.9594	0.92212	4.56464	0.00437311	32.5752	17.191
chr3	89964388	89964662	1.30894	4.35712	0.00103748	32.2581	13.02	0.92212	4.56464	0.00437311	32.5752	17.191
chr4	56222087	56222927	1.09701	4.46832	0.00267028	32.3753	15.135	0.92212	4.56464	0.00437311	32.5752	17.191
chr4	150488098	150488567	1.19889	4.41486	0.00170443	32.3189	14.0784	0.92212	4.56464	0.00437311	32.5752	17.191
chr7	122390157	122390631	3.77225	3.06464	3.07336e-08	30.9264	2.26344	0.92212	4.56464	0.00437311	32.5752	17.191
chr14	62258058	62258663	1.34858	3.63339	0.0057893	19.8035	7.77641	0.9179	3.89068	0.0197143	20.3878	10.7908
chr17	14904633	14905265	1.00307	3.81468	0.0139908	19.9209	9.9393	0.9179	3.89068	0.0197143	20.3878	10.7908
chr17	34922817	34923261	1.165	3.72972	0.0093272	19.8658	8.85945	0.9179	3.89068	0.0197143	20.3878	10.7908
chr3	135862807	135863209	2.51345	3.0222	0.000183582	19.4126	3.39986	0.9179	3.89068	0.0197143	20.3878	10.7908
chr4	123254493	123255025	1.00307	3.81468	0.0139908	19.9209	9.9393	0.9179	3.89068	0.0197143	20.3878	10.7908
chr5	125234386	125234761	1.00307	3.81468	0.0139908	19.9209	9.9393	0.9179	3.89068	0.0197143	20.3878	10.7908
chr5	130044144	130044483	1.81116	3.39068	0.00171535	19.6473	5.59873	0.9179	3.89068	0.0197143	20.3878	10.7908
chr7	143111600	143112134	1.00307	3.81468	0.0139908	19.9209	9.9393	0.9179	3.89068	0.0197143	20.3878	10.7908
chr7	143180738	143181521	1.5605	3.5222	0.00330817	19.7318	6.68972	0.9179	3.89068	0.0197143	20.3878	10.7908
chr8	106603161	106604104	1.165	3.72972	0.0093272	19.8658	8.85945	0.9179	3.89068	0.0197143	20.3878	10.7908
chr14	103723874	103724186	1.86791	4.22766	2.89642e-05	35.7933	9.80631	0.91132	4.72766	0.00389378	36.3359	19.3197
chr16	36989370	36989905	2.02984	4.1427	1.25931e-05	35.6942	8.74091	0.91132	4.72766	0.00389378	36.3359	19.3197
chr3	9895168	9896022	1.26047	4.54638	0.000708028	36.1673	15.0965	0.91132	4.72766	0.00389378	36.3359	19.3197
chr6	42326536	42326886	1.36236	4.49292	0.000416487	36.1043	14.0426	0.91132	4.72766	0.00389378	36.3359	19.3197
chr18	80714460	80715143	1.51449	5.01395	5.66925e-06	54.614	19.116	0.90962	5.30643	0.000999374	54.2385	28.8725
chr2	118723556	118724048	1.36964	5.08995	1.92349e-05	54.7495	21.1874	0.90962	5.30643	0.000999374	54.2385	28.8725
chr10	83692438	83692908	2.64488	3.08496	6.03199e-05	21.2208	3.3929	0.90836	4.0222	0.0159592	22.2599	11.8599
chr14	56058622	56058984	1.13451	3.87744	0.00751021	21.7765	9.91897	0.90836	4.0222	0.0159592	22.2599	11.8599
chr16	21209998	21210639	1.13451	3.87744	0.00751021	21.7765	9.91897	0.90836	4.0222	0.0159592	22.2599	11.8599
chr5	111573344	111574078	2.24938	3.29248	0.0001885	21.3649	4.49335	0.90836	4.0222	0.0159592	22.2599	11.8599
chr7	98535851	98536391	1.48001	3.69616	0.00272548	21.6481	7.76051	0.90836	4.0222	0.0159592	22.2599	11.8599
chr7	114043611	114043920	2.24938	3.29248	0.0001885	21.3649	4.49335	0.90836	4.0222	0.0159592	22.2599	11.8599
chr19	31663977	31665023	1.15244	4.67878	0.000947135	38.1866	17.1788	0.90686	4.80274	0.00320447	38.2177	20.3832
chr14	7889249	7890280	2.17733	4.21313	2.97914e-06	39.4457	8.72085	0.90289	4.8741	0.00264032	40.1003	21.4462
chr15	38373764	38374378	1.41735	3.85022	0.0022449	23.5702	8.8247	0.90053	4.1427	0.0129602	24.1335	12.9281
chr15	97892452	97893188	1.81285	3.6427	0.000947993	23.4112	6.66347	0.90053	4.1427	0.0129602	24.1335	12.9281
chr4	100886484	100887368	1.41735	3.85022	0.0022449	23.5702	8.8247	0.90053	4.1427	0.0129602	24.1335	12.9281
chr8	57328391	57328872	1.25542	3.93518	0.00381633	23.6356	9.90031	0.90053	4.1427	0.0129602	24.1335	12.9281
chr1	62701099	62701374	1.46639	2.5222	0.0174561	9.54927	3.45576	0.89945	2.89068	0.0458221	10.1289	5.43001
chr1	185343474	185343745	2.02382	2.22972	0.0134277	9.4586	2.32592	0.89945	2.89068	0.0458221	10.1289	5.43001
chr11	96622821	96623155	1.07088	2.72972	0.0458221	9.61413	4.5766	0.89945	2.89068	0.0458221	10.1289	5.43001
chr13	28592927	28593184	1.07088	2.72972	0.0458221	9.61413	4.5766	0.89945	2.89068	0.0458221	10.1289	5.43001
chr14	30265750	30266089	2.02382	2.22972	0.0134277	9.4586	2.32592	0.89945	2.89068	0.0458221	10.1289	5.43001
chr15	57600613	57600917	2.02382	2.22972	0.0134277	9.4586	2.32592	0.89945	2.89068	0.0458221	10.1289	5.43001
chr2	168882008	168882234	1.07088	2.72972	0.0458221	9.61413	4.5766	0.89945	2.89068	0.0458221	10.1289	5.43001
chr3	20509254	20509530	1.07088	2.72972	0.0458221	9.61413	4.5766	0.89945	2.89068	0.0458221	10.1289	5.43001
chr3	79039736	79040025	2.02382	2.22972	0.0134277	9.4586	2.32592	0.89945	2.89068	0.0458221	10.1289	5.43001
chr13	41238559	41239385	1.09148	4.13339	0.00492487	25.6188	12.0224	0.89402	4.2539	0.0105533	26.0084	13.9955
chr14	20845251	20846593	1.09148	4.13339	0.00492487	25.6188	12.0224	0.89402	4.2539	0.0105533	26.0084	13.9955
chr2	84703467	84703945	1.09148	4.13339	0.00492487	25.6188	12.0224	0.89402	4.2539	0.0105533	26.0084	13.9955
chr2	178414181	178414905	1.36736	3.98864	0.00267143	25.4982	9.88306	0.89402	4.2539	0.0105533	26.0084	13.9955
chr6	144919574	144920182	1.52929	3.90368	0.00152653	25.4276	8.80932	0.89402	4.2539	0.0105533	26.0084	13.9955
chr2	17723235	17724099	1.51043	4.7608	2.96358e-05	45.76	16.0621	0.8933	5.06914	0.00211003	45.7527	24.6324
chr7	19473856	19474561	1.3202	4.92118	8.18287e-05	47.8775	19.1739	0.89071	5.12869	0.00174893	47.6383	25.6936
chr4	127168285	127169443	1.81709	3.85712	0.000342491	27.2025	7.71987	0.88854	4.35712	0.00861363	27.8846	15.0621
chr9	71873840	71874510	1.32673	4.11441	0.00218883	27.4318	10.9362	0.88854	4.35712	0.00861363	27.8846	15.0621
chr15	84595487	84596150	1.17357	4.29248	0.00290114	29.431	13.0475	0.8839	4.45345	0.00704499	29.7619	16.128
chr4	117772655	117773388	1.731	4	0.000296516	29.1516	8.78169	0.8839	4.45345	0.00704499	29.7619	16.128
chr1	90588445	90588674	1.32323	2.85022	0.0333252	11.4069	4.55864	0.88207	3.1427	0.0480537	11.9898	6.50552
chr10	88304351	88304620	1.71874	2.6427	0.0111084	11.33	3.4422	0.88207	3.1427	0.0480537	11.9898	6.50552
chr12	31533538	31533907	1.32323	2.85022	0.0333252	11.4069	4.55864	0.88207	3.1427	0.0480537	11.9898	6.50552
chr13	13868003	13868415	1.01645	3.01118	0.0472107	11.467	5.66847	0.88207	3.1427	0.0480537	11.9898	6.50552
chr3	121891327	121891743	1.01645	3.01118	0.0472107	11.467	5.66847	0.88207	3.1427	0.0480537	11.9898	6.50552
chr5	114239001	114239246	1.32323	2.85022	0.0333252	11.4069	4.55864	0.88207	3.1427	0.0480537	11.9898	6.50552
chrX	13513194	13513471	1.01645	3.01118	0.0472107	11.467	5.66847	0.88207	3.1427	0.0480537	11.9898	6.50552
chrX	134647991	134648403	1.01645	3.01118	0.0472107	11.467	5.66847	0.88207	3.1427	0.0480537	11.9898	6.50552
chr12	117533578	117534662	1.82258	4.04373	0.000124346	31.0178	8.76917	0.87992	4.54373	0.00577251	31.6403	17.1933
chr17	80620696	80621459	1.82258	4.04373	0.000124346	31.0178	8.76917	0.87992	4.54373	0.00577251	31.6403	17.1933
chr5	106756915	106757675	1.5158	4.2047	0.000486643	31.181	10.9041	0.87992	4.54373	0.00577251	31.6403	17.1933
chr16	18158771	18159997	1.36352	5.21836	9.48235e-06	59.7189	23.2087	0.87942	5.44209	0.000748208	58.9654	32.0527
chr15	64486944	64487702	1.47111	4.31468	0.000408704	33.1339	11.9515	0.87648	4.62869	0.00473754	33.5196	18.2579
chr15	73434822	73435379	2.30443	3.87744	8.47811e-06	32.6647	6.61265	0.87648	4.62869	0.00473754	33.5196	18.2579
chr16	75353357	75353955	1.04471	4.53841	0.00297372	33.3766	16.179	0.87648	4.62869	0.00473754	33.5196	18.2579
chr16	92581765	92582522	1.60215	4.24593	0.000217976	33.0596	10.8894	0.87648	4.62869	0.00473754	33.5196	18.2579
chr18	11947169	11948113	1.04471	4.53841	0.00297372	33.3766	16.179	0.87648	4.62869	0.00473754	33.5196	18.2579
chr3	106040283	106040737	1.04471	4.53841	0.00297372	33.3766	16.179	0.87648	4.62869	0.00473754	33.5196	18.2579
chr8	121125120	121125863	1.22124	4.52764	0.000999569	35.2184	15.1057	0.8735	4.70893	0.00509731	35.4	19.322
chr11	76524699	76525404	1.20387	4.61441	0.000824039	37.1771	16.139	0.8709	4.78493	0.00419897	37.2813	20.3856
chr1	65198455	65198890	-1.18409	4.38244	0.00237138	13.8363	31.439	0.87009	3.35712	0.0381196	13.8534	7.57937
chr1	171515068	171515396	1.9349	2.74593	0.00427246	13.1171	3.43063	0.87009	3.35712	0.0381196	13.8534	7.57937
chr1	173317759	173318526	-1.2307	4.40689	0.00170443	13.8474	32.4971	0.87009	3.35712	0.0381196	13.8534	7.57937
chr13	104947969	104948292	1.23262	3.11441	0.0258751	13.2757	5.64941	0.87009	3.35712	0.0381196	13.8534	7.57937
chr14	64046262	64046790	1.23262	3.11441	0.0258751	13.2757	5.64941	0.87009	3.35712	0.0381196	13.8534	7.57937
chr19	58978721	58979088	1.5394	2.95345	0.0163422	13.2062	4.54332	0.87009	3.35712	0.0381196	13.8534	7.57937
chr2	28829371	28829793	1.9349	2.74593	0.00427246	13.1171	3.43063	0.87009	3.35712	0.0381196	13.8534	7.57937
chr5	73114914	73115223	1.23262	3.11441	0.0258751	13.2757	5.64941	0.87009	3.35712	0.0381196	13.8534	7.57937
chr6	91993849	91994185	1.5394	2.95345	0.0163422	13.2062	4.54332	0.87009	3.35712	0.0381196	13.8534	7.57937
chr9	71646143	71646475	1.23262	3.11441	0.0258751	13.2757	5.64941	0.87009	3.35712	0.0381196	13.8534	7.57937
chr15	102253466	102253872	1.18884	4.69616	0.000679994	39.1402	17.169	0.86863	4.85712	0.00346271	39.1634	21.4486
chr11	78771611	78772424	1.08983	6.29914	4.22451e-07	114.886	53.9752	0.86329	6.35163	2.57156e-05	110.146	60.5469
chr16	34056138	34057273	1.08377	4.95345	0.000603544	45.1086	21.282	0.86328	5.05426	0.00273412	44.8147	24.6348
chr10	86990569	86991522	1.73768	4.67215	4.88168e-06	46.559	13.9608	0.86188	5.11441	0.00226889	46.6999	25.696
chr17	90628460	90628935	1.42169	3.2047	0.0129375	15.0902	5.6328	0.86146	3.54373	0.0304427	15.7193	8.65181
chr18	38845502	38845918	1.17103	3.33621	0.0203304	15.1551	6.73042	0.86146	3.54373	0.0304427	15.7193	8.65181
chr2	13776538	13777146	1.42169	3.2047	0.0129375	15.0902	5.6328	0.86146	3.54373	0.0304427	15.7193	8.65181
chr6	118099263	118099820	1.17103	3.33621	0.0203304	15.1551	6.73042	0.86146	3.54373	0.0304427	15.7193	8.65181
chr7	44317906	44318435	1.17103	3.33621	0.0203304	15.1551	6.73042	0.86146	3.54373	0.0304427	15.7193	8.65181
chr9	13849095	13849469	1.42169	3.2047	0.0129375	15.0902	5.6328	0.86146	3.54373	0.0304427	15.7193	8.65181
chr9	106112645	106113274	1.17103	3.33621	0.0203304	15.1551	6.73042	0.86146	3.54373	0.0304427	15.7193	8.65181
chr1	121490143	121490609	1.12712	3.52764	0.0161167	17.0441	7.80328	0.85505	3.70893	0.0244437	17.5872	9.723
chr1	153431632	153432011	1.12712	3.52764	0.0161167	17.0441	7.80328	0.85505	3.70893	0.0244437	17.5872	9.723
chr10	3740155	3740573	1.5897	3.28493	0.00601691	16.9097	5.61808	0.85505	3.70893	0.0244437	17.5872	9.723
chr15	38601090	38601803	2.29199	2.91645	0.000543594	16.7077	3.41161	0.85505	3.70893	0.0244437	17.5872	9.723
chr3	55793878	55794425	1.89648	3.12396	0.00313926	16.8211	4.51812	0.85505	3.70893	0.0244437	17.5872	9.723
chr3	134199878	134200311	1.33905	3.41645	0.0103147	16.9824	6.71283	0.85505	3.70893	0.0244437	17.5872	9.723
chrX	52884591	52885021	2.29199	2.91645	0.000543594	16.7077	3.41161	0.85505	3.70893	0.0244437	17.5872	9.723
chr10	18210688	18211177	1.2783	3.59984	0.00827042	18.8826	7.78493	0.85017	3.85712	0.0254378	19.4569	10.7931
chr11	44897248	44897972	1.09472	3.69616	0.0128651	18.9421	8.86915	0.85017	3.85712	0.0254378	19.4569	10.7931
chr11	114558939	114559410	1.09472	3.69616	0.0128651	18.9421	8.86915	0.85017	3.85712	0.0254378	19.4569	10.7931
chr11	115083777	115083926	1.49023	3.48864	0.00490099	18.8143	6.69704	0.85017	3.85712	0.0254378	19.4569	10.7931
chr12	32131907	32132295	1.09472	3.69616	0.0128651	18.9421	8.86915	0.85017	3.85712	0.0254378	19.4569	10.7931
chr12	83018077	83018332	1.09472	3.69616	0.0128651	18.9421	8.86915	0.85017	3.85712	0.0254378	19.4569	10.7931
chr15	94214407	94214967	1.49023	3.48864	0.00490099	18.8143	6.69704	0.85017	3.85712	0.0254378	19.4569	10.7931
chr16	35490204	35491037	1.09472	3.69616	0.0128651	18.9421	8.86915	0.85017	3.85712	0.0254378	19.4569	10.7931
chr5	120294380	120295027	1.09472	3.69616	0.0128651	18.9421	8.86915	0.85017	3.85712	0.0254378	19.4569	10.7931
chr10	76488234	76488712	1.62765	3.55426	0.00220545	20.6503	6.68272	0.84639	3.9915	0.0206531	21.3282	11.8622
chr14	55047802	55048393	2.58059	3.05426	0.00010556	20.3162	3.3963	0.84639	3.9915	0.0206531	21.3282	11.8622
chr18	75715996	75716449	1.07022	3.84674	0.0103265	20.8482	9.92891	0.84639	3.9915	0.0206531	21.3282	11.8622
chr19	5468384	5468741	1.41572	3.66546	0.00399737	20.7253	7.76828	0.84639	3.9915	0.0206531	21.3282	11.8622
chr6	89257990	89258651	1.07022	3.84674	0.0103265	20.8482	9.92891	0.84639	3.9915	0.0206531	21.3282	11.8622
chr12	117425219	117425770	1.75361	3.61441	0.00145359	22.49	6.66963	0.84342	4.11441	0.0168132	23.2011	12.9304
chr17	6202434	6203094	1.54168	3.72561	0.00183674	22.5717	7.75306	0.84342	4.11441	0.0168132	23.2011	12.9304
chr3	79194155	79194898	1.05132	3.98289	0.00832654	22.762	10.9832	0.84342	4.11441	0.0168132	23.2011	12.9304
chr15	42437908	42438782	1.17549	6.1745	1.79106e-07	108.552	48.0598	0.8377	6.28789	4.34451e-05	104.455	58.4462
chr13	9897110	9897662	1.01557	4.32732	0.00445533	28.5437	14.1187	0.83767	4.43054	0.00918911	28.8276	16.1304
chr16	55720341	55721001	1.01557	4.32732	0.00445533	28.5437	14.1187	0.83767	4.43054	0.00918911	28.8276	16.1304
chr18	9212866	9214076	1.01557	4.32732	0.00445533	28.5437	14.1187	0.83767	4.43054	0.00918911	28.8276	16.1304
chr3	14944423	14945277	1.01557	4.32732	0.00445533	28.5437	14.1187	0.83767	4.43054	0.00918911	28.8276	16.1304
chr13	37658053	37658454	1.61556	4.10716	0.000385471	30.1678	9.84493	0.83645	4.5222	0.00753961	30.7054	17.1957
chr15	78826369	78827065	1.22005	4.31468	0.00207915	30.3727	13.038	0.83645	4.5222	0.00753961	30.7054	17.1957
chr14	120372741	120373457	1.19889	4.41486	0.00170443	32.3189	14.0784	0.83547	4.60837	0.00619525	32.5843	18.2603
chr6	52005946	52006352	1.55959	4.22561	0.000326964	32.12	10.8966	0.83547	4.60837	0.00619525	32.5843	18.2603
chr9	37592561	37593047	1.40797	4.61681	0.000165142	39.9685	15.0618	0.83315	4.90929	0.00509539	40.1093	22.5135
chr3	152165353	152166399	1.35875	4.77729	0.000116406	43.9158	17.1237	0.83262	5.03908	0.0035153	43.8768	24.6372
chr17	79052026	79052865	1.70716	4.65757	7.52258e-06	45.6061	13.9674	0.83246	5.09984	0.00292158	45.7617	25.6984
chr4	141286963	141288067	1.33835	4.85109	9.7624e-05	45.8949	18.1502	0.83246	5.09984	0.00292158	45.7617	25.6984
chr14	15354151	15354778	2.1864	4.52492	1.48622e-07	49.1161	10.7908	0.83231	5.21418	0.00202034	49.5335	27.8195
chr15	73866548	73867186	1.21156	5.32193	3.32703e-05	60.8721	26.2846	0.8101	5.5	0.00111734	59.9235	34.1769
chr11	70770787	70771365	1.01254	5.112	0.00062703	49.1211	24.348	0.80457	5.20044	0.00259018	48.5947	27.822
chr2	120499777	120500562	1.22862	4.87744	0.000236353	44.9969	19.2013	0.80244	5.08496	0.00373313	44.8235	25.7008
chr1	170644174	170644786	1.34784	4.68316	0.000200889	40.9866	16.1028	0.80012	4.95943	0.00538537	41.0552	23.578
chr4	120229608	120230157	1.835	4.35712	1.65884e-05	38.7097	10.85	0.79889	4.89232	0.00647034	39.1723	22.5159
chr16	52452696	52453651	1.07681	6.1848	1.17303e-06	105.654	50.0881	0.79781	6.26812	7.13724e-05	101.619	58.4536
chr17	85799756	85800778	1.51065	4.45345	0.00015759	36.9824	12.9791	0.79759	4.82193	0.00579857	37.2901	21.4534
chr7	143785059	143785418	1.03179	4.7047	0.00199951	37.2868	18.237	0.79759	4.82193	0.00579857	37.2901	21.4534
chr15	84662917	84663459	1.03766	4.62396	0.00243645	35.3293	17.2095	0.79622	4.74793	0.0070088	35.4089	20.3904
chr5	37040687	37041257	1.12638	4.57741	0.00159306	35.2757	16.1584	0.79622	4.74793	0.0070088	35.4089	20.3904
chr8	54076686	54078089	2.3861	3.91645	3.06708e-06	34.5233	6.60424	0.79622	4.74793	0.0070088	35.4089	20.3904
chr9	116193443	116194311	1.82867	4.20893	4.53353e-05	34.8542	9.8123	0.79622	4.74793	0.0070088	35.4089	20.3904
chrY	90738840	90740604	1.05107	7.66736	3.17469e-14	292.623	141.223	0.79574	7.68214	3.10846e-09	270.598	155.877
chr2	17730716	17731553	2.30443	3.87744	8.47811e-06	32.6647	6.61265	0.79478	4.66993	0.00660762	33.5285	19.3268
chr3	86920216	86921032	1.747	4.16993	0.000108988	32.9778	9.82479	0.79478	4.66993	0.00660762	33.5285	19.3268
chr18	75065357	75066264	1.05322	4.44741	0.00363612	31.4289	15.1453	0.79326	4.58746	0.00801738	31.6491	18.2628
chr9	32405194	32405926	1.05322	4.44741	0.00363612	31.4289	15.1453	0.79326	4.58746	0.00801738	31.6491	18.2628
chr1	156284167	156284679	1.06353	4.35022	0.00445533	29.4865	14.1082	0.79165	4.5	0.00973866	29.7707	17.1981
chr14	17659049	17659476	1.17357	4.29248	0.00290114	29.431	13.0475	0.79165	4.5	0.00973866	29.7707	17.1981
chr7	126707466	126708016	1.58754	5.19401	8.45772e-07	63.4601	21.1156	0.79014	5.57678	0.000998233	62.7633	36.2951
chr8	72135032	72135475	1.1957	4.18316	0.00355685	27.4934	12.0029	0.78993	4.40689	0.0118437	27.8934	16.1328
chr8	121359093	121360312	1.32673	4.11441	0.00218883	27.4318	10.9362	0.78993	4.40689	0.0118437	27.8934	16.1328
chr12	36214793	36215406	1.52929	3.90368	0.00152653	25.4276	8.80932	0.78809	4.30735	0.0144228	26.0173	15.0669
chr4	130784814	130785197	1.52929	3.90368	0.00152653	25.4276	8.80932	0.78809	4.30735	0.0144228	26.0173	15.0669
chr6	64727554	64728325	1.22251	4.06464	0.00311044	25.5615	10.954	0.78809	4.30735	0.0144228	26.0173	15.0669
chr10	117836418	117836760	1.41735	3.85022	0.0022449	23.5702	8.8247	0.78612	4.20044	0.0175888	24.1424	14.0003
chr11	23048024	23048498	1.11057	4.01118	0.00607144	23.6943	10.9731	0.78612	4.20044	0.0175888	24.1424	14.0003
chr18	78172141	78173100	1.11057	4.01118	0.00607144	23.6943	10.9731	0.78612	4.20044	0.0175888	24.1424	14.0003
chr2	22783273	22783565	-1.07432	5.15757	0.000383957	24.5971	51.7948	0.78612	4.20044	0.0175888	24.1424	14.0003
chr8	61358958	61359502	2.06351	3.51118	0.000442397	23.311	5.57677	0.78612	4.20044	0.0175888	24.1424	14.0003
chr1	172463714	172464249	1.29644	3.79248	0.00469388	21.7162	8.84133	0.78399	4.08496	0.0214835	22.2689	12.9329
chr10	13689891	13690148	1.48001	3.69616	0.00272548	21.6481	7.76051	0.78399	4.08496	0.0214835	22.2689	12.9329
chr14	121804504	121804965	1.13451	3.87744	0.00751021	21.7765	9.91897	0.78399	4.08496	0.0214835	22.2689	12.9329
chr18	80001237	80001515	1.48001	3.69616	0.00272548	21.6481	7.76051	0.78399	4.08496	0.0214835	22.2689	12.9329
chr19	7089834	7090266	1.13451	3.87744	0.00751021	21.7765	9.91897	0.78399	4.08496	0.0214835	22.2689	12.9329
chr2	93428073	93428657	1.13451	3.87744	0.00751021	21.7765	9.91897	0.78399	4.08496	0.0214835	22.2689	12.9329
chr7	143739910	143740604	1.29644	3.79248	0.00469388	21.7162	8.84133	0.78399	4.08496	0.0214835	22.2689	12.9329
chr1	132125870	132126377	1.03476	5.29154	0.000263471	56.0609	27.3631	0.78391	5.39477	0.00203858	55.2048	32.0624
chr1	191724453	191724998	1.81116	3.39068	0.00171535	19.6473	5.59873	0.78167	3.95943	0.0262857	20.3967	11.8646
chr11	119952332	119952793	1.5605	3.5222	0.00330817	19.7318	6.68972	0.78167	3.95943	0.0262857	20.3967	11.8646
chr12	21543074	21543799	2.51345	3.0222	0.000183582	19.4126	3.39986	0.78167	3.95943	0.0262857	20.3967	11.8646
chr13	28433070	28433825	1.5605	3.5222	0.00330817	19.7318	6.68972	0.78167	3.95943	0.0262857	20.3967	11.8646
chr3	109308492	109308919	1.5605	3.5222	0.00330817	19.7318	6.68972	0.78167	3.95943	0.0262857	20.3967	11.8646
chr7	68027909	68028651	1.00307	3.81468	0.0139908	19.9209	9.9393	0.78167	3.95943	0.0262857	20.3967	11.8646
chr7	98361013	98361661	1.165	3.72972	0.0093272	19.8658	8.85945	0.78167	3.95943	0.0262857	20.3967	11.8646
chr8	116552046	116552634	1.00307	3.81468	0.0139908	19.9209	9.9393	0.78167	3.95943	0.0262857	20.3967	11.8646
chr1	39976754	39977335	1.2046	3.56464	0.0116399	17.9628	7.79387	0.77913	3.82193	0.0254378	18.5262	10.7955
chr1	52392826	52393264	1.2046	3.56464	0.0116399	17.9628	7.79387	0.77913	3.82193	0.0254378	18.5262	10.7955
chr10	61212768	61213166	1.66719	3.32193	0.00401127	17.8212	5.6113	0.77913	3.82193	0.0254378	18.5262	10.7955
chr11	76699728	76700320	1.02102	3.66096	0.0174598	18.0194	8.87934	0.77913	3.82193	0.0254378	18.5262	10.7955
chr12	4406176	4406543	1.2046	3.56464	0.0116399	17.9628	7.79387	0.77913	3.82193	0.0254378	18.5262	10.7955
chr12	72583029	72583533	1.41653	3.45345	0.00716299	17.8978	6.70474	0.77913	3.82193	0.0254378	18.5262	10.7955
chr13	32681068	32681464	1.2046	3.56464	0.0116399	17.9628	7.79387	0.77913	3.82193	0.0254378	18.5262	10.7955
chr13	52722663	52723218	1.02102	3.66096	0.0174598	18.0194	8.87934	0.77913	3.82193	0.0254378	18.5262	10.7955
chr13	58012015	58012502	1.2046	3.56464	0.0116399	17.9628	7.79387	0.77913	3.82193	0.0254378	18.5262	10.7955
chr15	84714718	84715131	1.97396	3.16096	0.00200564	17.7279	4.51267	0.77913	3.82193	0.0254378	18.5262	10.7955
chr16	38622379	38622737	1.41653	3.45345	0.00716299	17.8978	6.70474	0.77913	3.82193	0.0254378	18.5262	10.7955
chr19	7165830	7166274	1.41653	3.45345	0.00716299	17.8978	6.70474	0.77913	3.82193	0.0254378	18.5262	10.7955
chr2	69563345	69563994	2.92691	2.66096	0.000163078	17.4411	2.29344	0.77913	3.82193	0.0254378	18.5262	10.7955
chr2	128419553	128419911	1.02102	3.66096	0.0174598	18.0194	8.87934	0.77913	3.82193	0.0254378	18.5262	10.7955
chr4	104934916	104935357	1.2046	3.56464	0.0116399	17.9628	7.79387	0.77913	3.82193	0.0254378	18.5262	10.7955
chr5	12383250	12383951	1.41653	3.45345	0.00716299	17.8978	6.70474	0.77913	3.82193	0.0254378	18.5262	10.7955
chr5	120144035	120144406	1.41653	3.45345	0.00716299	17.8978	6.70474	0.77913	3.82193	0.0254378	18.5262	10.7955
chr9	15921634	15922175	1.66719	3.32193	0.00401127	17.8212	5.6113	0.77913	3.82193	0.0254378	18.5262	10.7955
chr10	60125984	60126536	1.25737	3.37744	0.0146125	16.0681	6.72138	0.77633	3.66993	0.0314276	16.6574	9.72543
chr14	70195252	70195541	1.04545	3.48864	0.0219187	16.1265	7.81322	0.77633	3.66993	0.0314276	16.6574	9.72543
chr14	76713912	76714350	1.04545	3.48864	0.0219187	16.1265	7.81322	0.77633	3.66993	0.0314276	16.6574	9.72543
chr15	95725826	95726299	1.04545	3.48864	0.0219187	16.1265	7.81322	0.77633	3.66993	0.0314276	16.6574	9.72543
chr16	8455073	8455554	1.50803	3.24593	0.00889456	15.9993	5.62523	0.77633	3.66993	0.0314276	16.6574	9.72543
chr3	38283572	38284123	1.04545	3.48864	0.0219187	16.1265	7.81322	0.77633	3.66993	0.0314276	16.6574	9.72543
chr3	83705328	83705736	1.25737	3.37744	0.0146125	16.0681	6.72138	0.77633	3.66993	0.0314276	16.6574	9.72543
chr3	123376439	123376971	-1.00037	4.56206	0.00437311	16.7012	33.4109	0.77633	3.66993	0.0314276	16.6574	9.72543
chr4	44173208	44173515	1.25737	3.37744	0.0146125	16.0681	6.72138	0.77633	3.66993	0.0314276	16.6574	9.72543
chr1	73862787	73863260	2.03239	2.79248	0.00259399	14.0129	3.42543	0.77319	3.5	0.0389667	14.7905	8.65423
chr1	172182969	172183354	2.03239	2.79248	0.00259399	14.0129	3.42543	0.77319	3.5	0.0389667	14.7905	8.65423
chr11	87556450	87557217	-1.03836	4.40368	0.00490086	14.769	30.3339	0.77319	3.5	0.0389667	14.7905	8.65423
chr13	95509597	95510259	1.07945	3.29248	0.0277233	14.2433	6.74003	0.77319	3.5	0.0389667	14.7905	8.65423
chr14	51388163	51388554	1.33011	3.16096	0.0184822	14.1823	5.64084	0.77319	3.5	0.0389667	14.7905	8.65423
chr14	70798629	70798933	1.33011	3.16096	0.0184822	14.1823	5.64084	0.77319	3.5	0.0389667	14.7905	8.65423
chr2	27899693	27900437	1.07945	3.29248	0.0277233	14.2433	6.74003	0.77319	3.5	0.0389667	14.7905	8.65423
chr6	47310673	47310964	1.07945	3.29248	0.0277233	14.2433	6.74003	0.77319	3.5	0.0389667	14.7905	8.65423
chr9	78340330	78340674	1.33011	3.16096	0.0184822	14.1823	5.64084	0.77319	3.5	0.0389667	14.7905	8.65423
chr11	18948606	18949618	1.75426	4.56978	8.49423e-06	43.6196	12.93	0.77179	5.06978	0.00473213	43.8854	25.7033
chr11	117224873	117225304	1.1284	3.06464	0.035408	12.3706	5.65859	0.76963	3.30735	0.0485158	12.9257	7.58179
chr13	44811495	44811876	1.1284	3.06464	0.035408	12.3706	5.65859	0.76963	3.30735	0.0485158	12.9257	7.58179
chr13	73976921	73977418	-1.08426	4.22561	0.00547208	12.848	27.2416	0.76963	3.30735	0.0485158	12.9257	7.58179
chr14	55236713	55237097	1.83068	2.69616	0.00694275	12.2228	3.43621	0.76963	3.30735	0.0485158	12.9257	7.58179
chr14	65078231	65079005	-1.46595	4.42587	0.000233233	12.9322	35.7247	0.76963	3.30735	0.0485158	12.9257	7.58179
chr14	102769785	102770167	1.1284	3.06464	0.035408	12.3706	5.65859	0.76963	3.30735	0.0485158	12.9257	7.58179
chr17	65717692	65718261	-1.08426	4.22561	0.00547208	12.848	27.2416	0.76963	3.30735	0.0485158	12.9257	7.58179
chr2	170877538	170877896	1.1284	3.06464	0.035408	12.3706	5.65859	0.76963	3.30735	0.0485158	12.9257	7.58179
chr4	14882615	14883080	1.1284	3.06464	0.035408	12.3706	5.65859	0.76963	3.30735	0.0485158	12.9257	7.58179
chr5	91751229	91751639	1.83068	2.69616	0.00694275	12.2228	3.43621	0.76963	3.30735	0.0485158	12.9257	7.58179
chr7	44640890	44641192	1.1284	3.06464	0.035408	12.3706	5.65859	0.76963	3.30735	0.0485158	12.9257	7.58179
chr9	116152892	116153226	1.1284	3.06464	0.035408	12.3706	5.65859	0.76963	3.30735	0.0485158	12.9257	7.58179
chr3	132949342	132950658	1.38179	4.69937	0.000138709	41.9403	16.0943	0.76931	5.00771	0.00567003	42.0013	24.6421
chr1	89196138	89196391	1.59783	2.58496	0.0174561	10.4387	3.44869	0.76553	3.08496	0.0606995	11.0634	6.50793
chr12	79872462	79872727	1.20232	2.79248	0.0333252	10.5096	4.56724	0.76553	3.08496	0.0606995	11.0634	6.50793
chr13	98504758	98505205	3.1082	1.79248	0.00268555	10.1724	1.17967	0.76553	3.08496	0.0606995	11.0634	6.50793
chr16	32138186	32138609	-1.20249	4.05426	0.00437143	10.9512	25.2027	0.76553	3.08496	0.0606995	11.0634	6.50793
chr16	90379971	90380240	1.20232	2.79248	0.0333252	10.5096	4.56724	0.76553	3.08496	0.0606995	11.0634	6.50793
chr2	158570398	158570726	1.20232	2.79248	0.0333252	10.5096	4.56724	0.76553	3.08496	0.0606995	11.0634	6.50793
chr4	32828531	32829061	-1.261	4.08496	0.00311044	10.9622	26.2721	0.76553	3.08496	0.0606995	11.0634	6.50793
chr7	79619557	79620038	1.59783	2.58496	0.0174561	10.4387	3.44869	0.76553	3.08496	0.0606995	11.0634	6.50793
chr8	114074175	114074446	1.20232	2.79248	0.0333252	10.5096	4.56724	0.76553	3.08496	0.0606995	11.0634	6.50793
chr9	60756317	60756563	1.20232	2.79248	0.0333252	10.5096	4.56724	0.76553	3.08496	0.0606995	11.0634	6.50793
chr1	77369160	77370192	1.19025	5.65189	6.79383e-06	75.9521	33.2841	0.76243	5.83067	0.000801579	74.1247	43.6966
chr1	156462403	156462977	1.07689	4.6427	0.0017935	36.2811	17.199	0.76072	4.80367	0.00739818	36.3536	21.4559
chr12	64829728	64829966	1.87985	2.16096	0.0134277	8.57947	2.33115	0.76068	2.82193	0.0610962	9.20403	5.4324
chr12	83965314	83965604	1.32241	2.45345	0.0268555	8.66171	3.46352	0.76068	2.82193	0.0610962	9.20403	5.4324
chr4	128579234	128579474	2.83279	1.66096	0.00878906	8.44068	1.18474	0.76068	2.82193	0.0610962	9.20403	5.4324
chr5	100098032	100098796	-1.06232	3.7047	0.0128651	9.02254	18.8417	0.76068	2.82193	0.0610962	9.20403	5.4324
chr5	136714708	136715228	1.32241	2.45345	0.0268555	8.66171	3.46352	0.76068	2.82193	0.0610962	9.20403	5.4324
chr7	34812609	34813069	1.32241	2.45345	0.0268555	8.66171	3.46352	0.76068	2.82193	0.0610962	9.20403	5.4324
chrX	102046806	102047620	-1.06232	3.7047	0.0128651	9.02254	18.8417	0.76068	2.82193	0.0610962	9.20403	5.4324
chr2	38825058	38825650	1.28284	4.45495	0.000856774	34.2104	14.06	0.75739	4.72869	0.00892029	34.4728	20.3929
chr1	155516689	155516935	2.49571	1.5	0.015625	6.71718	1.19098	0.75473	2.5	0.0805664	7.34808	4.35488
chr12	91088338	91088589	1.54277	2	0.0351562	6.82763	2.34342	0.75473	2.5	0.0805664	7.34808	4.35488
chr2	83771486	83771724	-1.03059	3.35022	0.0203304	7.13505	14.5759	0.75473	2.5	0.0805664	7.34808	4.35488
chr2	165250810	165251304	1.54277	2	0.0351562	6.82763	2.34342	0.75473	2.5	0.0805664	7.34808	4.35488
chr4	8572183	8572588	-1.3994	3.54373	0.00490099	7.18023	18.9409	0.75473	2.5	0.0805664	7.34808	4.35488
chr6	115174925	115175171	1.54277	2	0.0351562	6.82763	2.34342	0.75473	2.5	0.0805664	7.34808	4.35488
chr1	135913517	135914151	1.30894	4.35712	0.00103748	32.2581	13.02	0.75376	4.6496	0.00847771	32.5929	19.3294
chr3	86001005	86001884	1.01104	5.16993	0.000518591	51.1068	25.3587	0.75359	5.28112	0.00366913	50.4897	29.9467
chr8	117543737	117544169	1.43983	5.31604	1.77675e-06	65.6151	24.1865	0.75127	5.63922	0.00113186	64.6626	38.4148
chr1	133073000	133073789	1.11001	4.37242	0.00326724	30.43	14.0979	0.74979	4.56593	0.0102622	30.714	18.2653
chr12	12627582	12628522	2.42365	3.68316	1.41721e-05	29.7535	5.54557	0.74979	4.56593	0.0102622	30.714	18.2653
chr13	91216760	91217998	1.00812	4.42587	0.00490086	30.4831	15.156	0.74979	4.56593	0.0102622	30.714	18.2653
chr4	136266627	136267167	1.61556	4.10716	0.000385471	30.1678	9.84493	0.74979	4.56593	0.0102622	30.714	18.2653
chr9	32031960	32033443	1.61556	4.10716	0.000385471	30.1678	9.84493	0.74979	4.56593	0.0102622	30.714	18.2653
chr13	98353832	98354744	1.14544	4.98289	0.000317963	47.0333	21.2615	0.74747	5.17215	0.00416412	46.7172	27.827
chr2	118724155	118724449	1.07836	5.01809	0.000498624	47.0873	22.299	0.74747	5.17215	0.00416412	46.7172	27.827
chr1	60152817	60153052	-1.10446	2.95345	0.0333252	5.28248	11.3583	0.74707	2.08496	0.109375	5.49645	3.27484
chr12	51930369	51930608	2.06114	1.29248	0.046875	5.0039	1.19906	0.74707	2.08496	0.109375	5.49645	3.27484
chr15	74909468	74909776	-1.46516	3.1427	0.00739288	5.31519	14.6749	0.74707	2.08496	0.109375	5.49645	3.27484
chr5	149861477	149861943	-1.10446	2.95345	0.0333252	5.28248	11.3583	0.74707	2.08496	0.109375	5.49645	3.27484
chr7	101516552	101516795	-1.10446	2.95345	0.0333252	5.28248	11.3583	0.74707	2.08496	0.109375	5.49645	3.27484
chr9	98345739	98346275	-1.83397	3.33621	0.00126672	5.34885	19.0695	0.74707	2.08496	0.109375	5.49645	3.27484
chr14	75034196	75034746	2.07855	3.76958	9.78546e-05	28.0291	6.63595	0.74542	4.4771	0.0124323	28.8362	17.2006
chr15	79604985	79605636	1.01557	4.32732	0.00445533	28.5437	14.1187	0.74542	4.4771	0.0124323	28.8362	17.2006
chr2	170103923	170104199	1.24523	4.20681	0.00254061	28.4317	11.9936	0.74542	4.4771	0.0124323	28.8362	17.2006
chr6	144716448	144716756	1.24523	4.20681	0.00254061	28.4317	11.9936	0.74542	4.4771	0.0124323	28.8362	17.2006
chr8	79382943	79383368	1.86662	3.88078	0.000220173	28.131	7.71392	0.74542	4.4771	0.0124323	28.8362	17.2006
chr3	93597120	93597677	1.3072	4.83621	0.000140334	44.9365	18.159	0.74409	5.11441	0.0049775	44.8319	26.7666
chr3	37859925	37860569	1.58579	5.38574	1.64725e-07	72.4363	24.1316	0.74136	5.78493	0.00119174	71.289	42.6433
chr1	153807431	153808001	1.27552	4.08995	0.00311044	26.4962	10.945	0.74057	4.38244	0.0150739	26.9595	16.1353
chr10	69785129	69785653	1.02487	4.22147	0.00547208	26.6102	13.0777	0.74057	4.38244	0.0150739	26.9595	16.1353
chr11	49168943	49169760	1.5823	3.92899	0.00102747	26.3575	8.80205	0.74057	4.38244	0.0150739	26.9595	16.1353
chr15	67030478	67031417	1.27552	4.08995	0.00311044	26.4962	10.945	0.74057	4.38244	0.0150739	26.9595	16.1353
chr16	84702812	84703109	1.76588	3.83267	0.000528415	26.2748	7.72603	0.74057	4.38244	0.0150739	26.9595	16.1353
chr2	146062258	146062815	1.42037	4.01395	0.00184945	26.4306	9.8749	0.74057	4.38244	0.0150739	26.9595	16.1353
chr3	9844592	9845764	1.14449	4.15871	0.00355685	26.5557	12.0125	0.74057	4.38244	0.0150739	26.9595	16.1353
chr7	79140659	79141283	1.14449	4.15871	0.00355685	26.5557	12.0125	0.74057	4.38244	0.0150739	26.9595	16.1353
chr2	103871955	103872620	1.03476	5.29154	0.000263471	56.0609	27.3631	0.73704	5.41842	0.00271811	55.2132	33.1261
chr11	18969873	18970560	1.25911	4.72972	0.000342692	41.0489	17.1503	0.73659	4.9915	0.00710869	41.0637	24.6447
chr4	149606744	149608015	1.25911	4.72972	0.000342692	41.0489	17.1503	0.73659	4.9915	0.00710869	41.0637	24.6447
chr10	11492018	11492324	-1.22659	2.40368	0.0402832	3.45906	8.09467	0.73628	1.5	0.117188	3.65061	2.19141
chr5	151418641	151418914	-1.96761	2.79248	0.00583649	3.50321	13.7017	0.73628	1.5	0.117188	3.65061	2.19141
chr10	93325339	93325697	1.31243	3.96241	0.00267143	24.5665	9.89152	0.73514	4.28112	0.0182924	25.0839	15.0694
chr17	72603149	72603663	1.16758	4.03841	0.00437143	24.6275	10.9634	0.73514	4.28112	0.0182924	25.0839	15.0694
chr19	36129429	36130528	1.31243	3.96241	0.00267143	24.5665	9.89152	0.73514	4.28112	0.0182924	25.0839	15.0694
chr5	134221448	134222184	1.03654	4.10716	0.00673929	24.6828	12.0327	0.73514	4.28112	0.0182924	25.0839	15.0694
chr7	30811676	30812535	1.65794	3.78112	0.00122449	24.4217	7.73903	0.73514	4.28112	0.0182924	25.0839	15.0694
chr13	84648006	84648418	1.54168	3.72561	0.00183674	22.5717	7.75306	0.72901	4.17215	0.0222175	23.2097	14.0028
chr19	10497429	10497998	1.54168	3.72561	0.00183674	22.5717	7.75306	0.72901	4.17215	0.0222175	23.2097	14.0028
chr2	30590926	30591194	1.19617	3.90689	0.00538776	22.7056	9.90945	0.72901	4.17215	0.0222175	23.2097	14.0028
chr2	53200095	53200608	1.19617	3.90689	0.00538776	22.7056	9.90945	0.72901	4.17215	0.0222175	23.2097	14.0028
chr5	31831527	31832128	1.05132	3.98289	0.00832654	22.762	10.9832	0.72901	4.17215	0.0222175	23.2097	14.0028
chr5	118331451	118332444	1.05132	3.98289	0.00832654	22.762	10.9832	0.72901	4.17215	0.0222175	23.2097	14.0028
chr7	142644952	142645623	1.3581	3.82193	0.00326531	22.6428	8.83284	0.72901	4.17215	0.0222175	23.2097	14.0028
chr5	129594139	129594675	1.11514	4.66096	0.00130877	37.2336	17.1888	0.72785	4.85712	0.0101418	37.2985	22.521
chr6	61179901	61181121	1.7613	4.32193	4.01371e-05	36.8241	10.8624	0.72785	4.85712	0.0101418	37.2985	22.521
chr1	171788082	171789670	1.15224	5.39964	4.51689e-05	62.9337	28.3155	0.72682	5.58684	0.00169969	61.8305	37.3602
chr6	90550032	90551000	1.3262	5.26178	1.15615e-05	60.7528	24.2293	0.72345	5.54373	0.00202186	59.9403	36.3028
chr11	88131655	88132471	1.22124	4.52764	0.000999569	35.2184	15.1057	0.7229	4.78493	0.00934507	35.4172	21.4585
chr5	66323689	66324330	1.55279	4.35368	0.000185634	35.0192	11.9363	0.7229	4.78493	0.00934507	35.4172	21.4585
chr6	135377473	135378223	1.12638	4.57741	0.00159306	35.2757	16.1584	0.7229	4.78493	0.00934507	35.4172	21.4585
chr8	35825580	35827150	1.55279	4.35368	0.000185634	35.0192	11.9363	0.7229	4.78493	0.00934507	35.4172	21.4585
chr11	61193276	61193932	1.41572	3.66546	0.00399737	20.7253	7.76828	0.72202	4.05426	0.0270079	21.3368	12.9354
chr11	66905844	66906364	1.07022	3.84674	0.0103265	20.8482	9.92891	0.72202	4.05426	0.0270079	21.3368	12.9354
chr3	87411072	87411561	1.23215	3.76178	0.00666229	20.7905	8.85019	0.72202	4.05426	0.0270079	21.3368	12.9354
chr5	89844363	89844754	2.18509	3.26178	0.000316679	20.4542	4.49786	0.72202	4.05426	0.0270079	21.3368	12.9354
chr9	32475458	32475831	-1.04759	4.95794	0.000919032	21.6177	44.6856	0.72202	4.05426	0.0270079	21.3368	12.9354
chr13	93939233	93940141	1.22835	5.94266	5.15733e-07	94.1463	40.1821	0.72157	6.15018	0.00038368	91.2001	55.307
chr2	11173042	11173469	1.11492	4.96832	0.000439537	46.0707	21.2716	0.71805	5.15757	0.00521904	45.7786	27.8296
chr4	28176838	28177150	-2.06172	1.79248	0.0351562	1.69539	7.078	0.71782	0.5	0.1875	1.81367	1.10274
chr14	73445862	73446208	1.13956	4.48864	0.00194202	33.3224	15.125	0.7175	4.70893	0.00892029	33.5369	20.3955
chr17	51831552	51833468	1.04471	4.53841	0.00297372	33.3766	16.179	0.7175	4.70893	0.00892029	33.5369	20.3955
chr17	70754971	70755971	1.60215	4.24593	0.000217976	33.0596	10.8894	0.7175	4.70893	0.00892029	33.5369	20.3955
chr2	93029086	93029845	1.24145	4.43518	0.00121376	33.2644	14.0691	0.7175	4.70893	0.00892029	33.5369	20.3955
chr5	65025847	65026640	1.24145	4.43518	0.00121376	33.2644	14.0691	0.7175	4.70893	0.00892029	33.5369	20.3955
chrX	103694878	103696220	1.16321	5.72251	6.62403e-06	79.0181	35.283	0.71576	5.90849	0.000943046	76.9779	46.8706
chr11	52261984	52262281	1.49023	3.48864	0.00490099	18.8143	6.69704	0.71394	3.92587	0.0328572	19.4654	11.8672
chr14	30055979	30056882	1.2783	3.59984	0.00827042	18.8826	7.78493	0.71394	3.92587	0.0328572	19.4654	11.8672
chr7	25063340	25063975	1.09472	3.69616	0.0128651	18.9421	8.86915	0.71394	3.92587	0.0328572	19.4654	11.8672
chr8	13699319	13699835	1.2783	3.59984	0.00827042	18.8826	7.78493	0.71394	3.92587	0.0328572	19.4654	11.8672
chr8	25074782	25075140	1.2783	3.59984	0.00827042	18.8826	7.78493	0.71394	3.92587	0.0328572	19.4654	11.8672
chr10	82813986	82814547	1.12249	4.90126	0.000531794	44.0938	20.2523	0.71344	5.09922	0.00622188	43.8937	26.7692
chr2	101761959	101763171	1.35875	4.77729	0.000116406	43.9158	17.1237	0.71344	5.09922	0.00622188	43.8937	26.7692
chr3	144355957	144356898	1.54233	4.68097	3.46039e-05	43.7781	15.0304	0.71344	5.09922	0.00622188	43.8937	26.7692
chr9	72968293	72968970	1.05197	4.93826	0.000823014	44.147	21.2925	0.71344	5.09922	0.00622188	43.8937	26.7692
chr1	37696291	37697324	1.72439	5.39068	1.51037e-08	76.261	23.0786	0.71267	5.8741	0.00111516	75.0839	45.8154
chr11	20656577	20657121	1.1551	4.39395	0.00237138	31.3741	14.088	0.71156	4.62869	0.0107602	31.6575	19.3319
chr12	102443611	102444039	1.1551	4.39395	0.00237138	31.3741	14.088	0.71156	4.62869	0.0107602	31.6575	19.3319
chr13	28833044	28833733	1.66065	4.12869	0.000254908	31.1038	9.83801	0.71156	4.62869	0.0107602	31.6575	19.3319
chr14	48206974	48207512	1.5158	4.2047	0.000486643	31.181	10.9041	0.71156	4.62869	0.0107602	31.6575	19.3319
chr9	45274027	45275033	1.52728	5.41645	2.14504e-07	72.5088	25.1556	0.70606	5.80274	0.00155739	71.2971	43.7044
chr3	58713971	58714519	1.42422	4.16096	0.00105129	29.305	10.9196	0.70499	4.54373	0.0129849	29.7791	18.2679
chr1	12990964	12991308	2.29199	2.91645	0.000543594	16.7077	3.41161	0.70445	3.78493	0.0322212	17.5957	10.7981
chr10	14046983	14047691	1.33905	3.41645	0.0103147	16.9824	6.71283	0.70445	3.78493	0.0322212	17.5957	10.7981
chr10	68552407	68553069	1.5897	3.28493	0.00601691	16.9097	5.61808	0.70445	3.78493	0.0322212	17.5957	10.7981
chr16	84698729	84699098	1.33905	3.41645	0.0103147	16.9824	6.71283	0.70445	3.78493	0.0322212	17.5957	10.7981
chr19	10970379	10971094	1.12712	3.52764	0.0161167	17.0441	7.80328	0.70445	3.78493	0.0322212	17.5957	10.7981
chr3	135597689	135598080	-1.00465	4.64616	0.003587	17.6774	35.469	0.70445	3.78493	0.0322212	17.5957	10.7981
chr4	8367543	8368055	1.12712	3.52764	0.0161167	17.0441	7.80328	0.70445	3.78493	0.0322212	17.5957	10.7981
chr5	36361495	36362194	1.5897	3.28493	0.00601691	16.9097	5.61808	0.70445	3.78493	0.0322212	17.5957	10.7981
chr9	21609892	21610255	1.12712	3.52764	0.0161167	17.0441	7.80328	0.70445	3.78493	0.0322212	17.5957	10.7981
chr15	77358307	77359016	1.61989	4.50561	4.67067e-05	39.8238	12.9571	0.70311	4.97491	0.00883201	40.1261	24.6473
chr10	9675057	9675754	1.07608	4.24593	0.00400634	27.5497	13.0673	0.69768	4.45345	0.0156755	27.9017	17.2032
chr10	75137144	75137779	1.07608	4.24593	0.00400634	27.5497	13.0673	0.69768	4.45345	0.0156755	27.9017	17.2032
chr11	22078830	22079386	-1.08998	5.38244	0.00013371	28.5902	60.8601	0.69768	4.45345	0.0156755	27.9017	17.2032
chr11	52305180	52305713	2.98196	3.24593	1.89058e-06	26.6656	3.37514	0.69768	4.45345	0.0156755	27.9017	17.2032
chr3	106032645	106033134	2.02902	3.74593	0.000156567	27.104	6.64108	0.69768	4.45345	0.0156755	27.9017	17.2032
chr18	46573959	46574629	1.54795	4.47126	0.000105751	37.929	12.9716	0.69731	4.90849	0.0105143	38.2435	23.5857
chr1	38725732	38726268	1.17103	3.33621	0.0203304	15.1551	6.73042	0.6931	3.62869	0.0395755	15.7278	9.728
chr1	106883835	106884216	1.42169	3.2047	0.0129375	15.0902	5.6328	0.6931	3.62869	0.0395755	15.7278	9.728
chr11	43358847	43359196	1.42169	3.2047	0.0129375	15.0902	5.6328	0.6931	3.62869	0.0395755	15.7278	9.728
chr11	44331461	44331932	1.42169	3.2047	0.0129375	15.0902	5.6328	0.6931	3.62869	0.0395755	15.7278	9.728
chr11	77239643	77240021	1.17103	3.33621	0.0203304	15.1551	6.73042	0.6931	3.62869	0.0395755	15.7278	9.728
chr14	66212506	66212790	-1.32996	4.64846	0.000288998	15.8178	39.7653	0.6931	3.62869	0.0395755	15.7278	9.728
chr17	9168485	9168779	1.72847	3.04373	0.00739288	15.0112	4.52996	0.6931	3.62869	0.0395755	15.7278	9.728
chr3	58367384	58367533	1.17103	3.33621	0.0203304	15.1551	6.73042	0.6931	3.62869	0.0395755	15.7278	9.728
chr3	75706585	75707002	1.17103	3.33621	0.0203304	15.1551	6.73042	0.6931	3.62869	0.0395755	15.7278	9.728
chr4	19618494	19618910	1.42169	3.2047	0.0129375	15.0902	5.6328	0.6931	3.62869	0.0395755	15.7278	9.728
chr4	32372976	32373735	1.72847	3.04373	0.00739288	15.0112	4.52996	0.6931	3.62869	0.0395755	15.7278	9.728
chr8	10598707	10599330	1.72847	3.04373	0.00739288	15.0112	4.52996	0.6931	3.62869	0.0395755	15.7278	9.728
chr8	88571398	88572049	1.17103	3.33621	0.0203304	15.1551	6.73042	0.6931	3.62869	0.0395755	15.7278	9.728
chr9	67170748	67171114	1.17103	3.33621	0.0203304	15.1551	6.73042	0.6931	3.62869	0.0395755	15.7278	9.728
chr9	117996537	117997076	1.16562	4.59615	0.00115055	36.2261	16.1486	0.69098	4.83886	0.0125082	36.3618	22.5236
chr14	115250560	115251370	1.71287	3.80735	0.000808164	25.3479	7.73241	0.68947	4.35712	0.01893	26.0256	16.138
chr4	135385507	135385991	1.36736	3.98864	0.00267143	25.4982	9.88306	0.68947	4.35712	0.01893	26.0256	16.138
chr8	68336410	68336997	1.09148	4.13339	0.00492487	25.6188	12.0224	0.68947	4.35712	0.01893	26.0256	16.138
chr8	95369444	95369950	1.36736	3.98864	0.00267143	25.4982	9.88306	0.68947	4.35712	0.01893	26.0256	16.138
chr14	101607826	101609406	1.23552	6.01499	2.5965e-07	99.2331	42.1432	0.68883	6.23989	0.000495596	95.9562	59.5272
chr15	97590521	97591234	1.67602	4.6427	1.15346e-05	44.6537	13.9742	0.68803	5.1427	0.00648853	44.84	27.8323
chr16	78198417	78199247	1.5125	4.33444	0.000276477	34.0762	11.9438	0.68407	4.76569	0.0116813	34.481	21.4611
chr14	25442587	25443141	1.25542	3.93518	0.00381633	23.6356	9.90031	0.68019	4.2539	0.0228655	24.1507	15.072
chr18	66520094	66520558	2.06351	3.51118	0.000442397	23.311	5.57677	0.68019	4.2539	0.0228655	24.1507	15.072
chr18	82985880	82986394	2.37029	3.35022	6.53788e-05	23.1889	4.4849	0.68019	4.2539	0.0228655	24.1507	15.072
chr2	173089367	173089844	1.11057	4.01118	0.00607144	23.6943	10.9731	0.68019	4.2539	0.0228655	24.1507	15.072
chr6	22474471	22475083	2.37029	3.35022	6.53788e-05	23.1889	4.4849	0.68019	4.2539	0.0228655	24.1507	15.072
chr9	56847575	56847993	1.41735	3.85022	0.0022449	23.5702	8.8247	0.68019	4.2539	0.0228655	24.1507	15.072
chr10	95032680	95033320	1.23262	3.11441	0.0258751	13.2757	5.64941	0.67922	3.45345	0.0487083	13.8619	8.65681
chr14	53367508	53367809	1.23262	3.11441	0.0258751	13.2757	5.64941	0.67922	3.45345	0.0487083	13.8619	8.65681
chr14	101949068	101949485	1.23262	3.11441	0.0258751	13.2757	5.64941	0.67922	3.45345	0.0487083	13.8619	8.65681
chr16	84817516	84817789	2.49234	2.45345	0.00160217	12.9926	2.30901	0.67922	3.45345	0.0487083	13.8619	8.65681
chr18	66488592	66489010	1.9349	2.74593	0.00427246	13.1171	3.43063	0.67922	3.45345	0.0487083	13.8619	8.65681
chr3	30978443	30978723	-1.03397	4.30367	0.00600951	13.8008	28.2592	0.67922	3.45345	0.0487083	13.8619	8.65681
chr7	30832241	30833018	1.23262	3.11441	0.0258751	13.2757	5.64941	0.67922	3.45345	0.0487083	13.8619	8.65681
chr8	22783463	22784295	1.23262	3.11441	0.0258751	13.2757	5.64941	0.67922	3.45345	0.0487083	13.8619	8.65681
chr17	83990383	83991214	1.34958	6.06946	1.54864e-08	107.206	42.0684	0.67652	6.35605	0.000335821	103.559	64.7939
chr12	3723637	3724496	1.09701	4.46832	0.00267028	32.3753	15.135	0.67648	4.68861	0.011233	32.601	20.3981
chr5	110970251	110970924	1.30894	4.35712	0.00103748	32.2581	13.02	0.67648	4.68861	0.011233	32.601	20.3981
chr2	116975084	116976253	1.2287	5.21523	4.76764e-05	56.8693	24.2662	0.67215	5.47564	0.00371635	56.1696	35.2504
chr2	164188778	164189146	1.29644	3.79248	0.00469388	21.7162	8.84133	0.66957	4.1427	0.0276217	22.2771	14.0054
chr5	98167094	98167876	1.69194	3.58496	0.00145359	21.5697	6.67604	0.66957	4.1427	0.0276217	22.2771	14.0054
chr5	107700791	107701312	1.13451	3.87744	0.00751021	21.7765	9.91897	0.66957	4.1427	0.0276217	22.2771	14.0054
chr9	99158744	99159105	1.69194	3.58496	0.00145359	21.5697	6.67604	0.66957	4.1427	0.0276217	22.2771	14.0054
chr1	182954324	182955070	1.96107	3.92587	8.89549e-05	29.99	7.70258	0.66809	4.60716	0.013503	30.7221	19.3346
chr15	59619793	59620255	1.22005	4.31468	0.00207915	30.3727	13.038	0.66809	4.60716	0.013503	30.7221	19.3346
chr2	112676616	112677138	1.47071	4.18316	0.000718378	30.2427	10.9117	0.66809	4.60716	0.013503	30.7221	19.3346
chr3	14915340	14915869	1.00812	4.42587	0.00490086	30.4831	15.156	0.66809	4.60716	0.013503	30.7221	19.3346
chr5	92896736	92897195	2.42365	3.68316	1.41721e-05	29.7535	5.54557	0.66809	4.60716	0.013503	30.7221	19.3346
chr18	5758944	5759781	1.0632	6.23342	1.11493e-06	108.761	52.0499	0.66646	6.37431	0.000352176	104.513	65.8484
chr10	118870287	118870599	1.29111	5.30367	1.39521e-05	61.7864	25.2483	0.66432	5.59615	0.00277319	60.8973	38.4254
chr10	76623223	76623656	1.71874	2.6427	0.0111084	11.33	3.4422	0.66173	3.2539	0.0600672	11.9983	7.58438
chr12	33057281	33057954	1.32323	2.85022	0.0333252	11.4069	4.55864	0.66173	3.2539	0.0600672	11.9983	7.58438
chr13	63850564	63850986	-1.35202	4.2539	0.00125716	11.9413	30.4824	0.66173	3.2539	0.0600672	11.9983	7.58438
chr19	29390520	29391066	-1.02047	4.07994	0.00910715	11.8737	24.0868	0.66173	3.2539	0.0600672	11.9983	7.58438
chr2	38543105	38543489	1.01645	3.01118	0.0472107	11.467	5.66847	0.66173	3.2539	0.0600672	11.9983	7.58438
chr2	71419369	71419843	-1.35202	4.2539	0.00125716	11.9413	30.4824	0.66173	3.2539	0.0600672	11.9983	7.58438
chr2	71571544	71571858	1.32323	2.85022	0.0333252	11.4069	4.55864	0.66173	3.2539	0.0600672	11.9983	7.58438
chr2	153131071	153131417	1.01645	3.01118	0.0472107	11.467	5.66847	0.66173	3.2539	0.0600672	11.9983	7.58438
chr3	50382772	50383098	1.01645	3.01118	0.0472107	11.467	5.66847	0.66173	3.2539	0.0600672	11.9983	7.58438
chr3	101939090	101939592	1.32323	2.85022	0.0333252	11.4069	4.55864	0.66173	3.2539	0.0600672	11.9983	7.58438
chr3	157631392	157631723	-1.02047	4.07994	0.00910715	11.8737	24.0868	0.66173	3.2539	0.0600672	11.9983	7.58438
chr4	106630859	106631288	1.32323	2.85022	0.0333252	11.4069	4.55864	0.66173	3.2539	0.0600672	11.9983	7.58438
chr6	65569794	65570105	1.01645	3.01118	0.0472107	11.467	5.66847	0.66173	3.2539	0.0600672	11.9983	7.58438
chr7	67459915	67460267	2.27617	2.35022	0.00476074	11.2224	2.3168	0.66173	3.2539	0.0600672	11.9983	7.58438
chr9	25400861	25401296	1.71874	2.6427	0.0111084	11.33	3.4422	0.66173	3.2539	0.0600672	11.9983	7.58438
chrX	52453365	52453826	1.71874	2.6427	0.0111084	11.33	3.4422	0.66173	3.2539	0.0600672	11.9983	7.58438
chr17	5303094	5303792	1.4006	4.51118	0.000287038	37.0521	14.0343	0.66135	4.89068	0.0128885	37.3065	23.5884
chr4	140816541	140816888	1.03179	4.7047	0.00199951	37.2868	18.237	0.66135	4.89068	0.0128885	37.3065	23.5884
chr5	93152041	93152882	1.20387	4.61441	0.000824039	37.1771	16.139	0.66135	4.89068	0.0128885	37.3065	23.5884
chr1	164441121	164442076	1.00985	5.22561	0.000429235	53.096	26.3673	0.66106	5.38078	0.00519863	52.3931	33.1341
chr4	152491277	152492135	1.54467	6.02117	2.89429e-10	110.93	38.024	0.65991	6.41645	0.000385947	107.366	67.9543
chr1	155200983	155201887	1.18777	5.31057	4.6655e-05	59.8988	26.2944	0.65908	5.55328	0.00327869	59.0073	37.3682
chr15	79950190	79950444	1.37627	4.13806	0.00152436	28.3681	10.9278	0.65876	4.52083	0.0162311	28.8442	18.2706
chr18	61758716	61759425	2.63599	3.4771	4.18629e-06	27.763	4.46638	0.65876	4.52083	0.0162311	28.8442	18.2706
chr2	102848892	102850010	-1.04045	5.40609	0.000202793	29.566	60.8131	0.65876	4.52083	0.0162311	28.8442	18.2706
chr6	128227330	128228085	2.63599	3.4771	4.18629e-06	27.763	4.46638	0.65876	4.52083	0.0162311	28.8442	18.2706
chr9	107325707	107326272	1.37627	4.13806	0.00152436	28.3681	10.9278	0.65876	4.52083	0.0162311	28.8442	18.2706
chr4	46700029	46700953	1.05197	4.93826	0.000823014	44.147	21.2925	0.65738	5.12751	0.00799956	43.9016	27.835
chr1	181226616	181227240	1.5605	3.5222	0.00330817	19.7318	6.68972	0.6573	4.0222	0.0333627	20.4049	12.9381
chr11	53359380	53359699	1.34858	3.63339	0.0057893	19.8035	7.77641	0.6573	4.0222	0.0333627	20.4049	12.9381
chr11	62748609	62748947	1.5605	3.5222	0.00330817	19.7318	6.68972	0.6573	4.0222	0.0333627	20.4049	12.9381
chr11	76506704	76507166	1.34858	3.63339	0.0057893	19.8035	7.77641	0.6573	4.0222	0.0333627	20.4049	12.9381
chr15	56046709	56047252	1.34858	3.63339	0.0057893	19.8035	7.77641	0.6573	4.0222	0.0333627	20.4049	12.9381
chr15	84526671	84527280	2.11794	3.22972	0.000791699	19.5444	4.50256	0.6573	4.0222	0.0333627	20.4049	12.9381
chr5	72845134	72845612	1.34858	3.63339	0.0057893	19.8035	7.77641	0.6573	4.0222	0.0333627	20.4049	12.9381
chr6	97321045	97321546	2.51345	3.0222	0.000183582	19.4126	3.39986	0.6573	4.0222	0.0333627	20.4049	12.9381
chrX	133981314	133981960	3.07088	2.72972	5.00679e-05	19.2283	2.2883	0.6573	4.0222	0.0333627	20.4049	12.9381
chr11	103170914	103171523	1.44582	5.12633	6.16201e-06	57.6497	21.1623	0.65354	5.5091	0.00387391	57.1179	36.3108
chr4	140944898	140945547	1.03766	4.62396	0.00243645	35.3293	17.2095	0.65316	4.82012	0.0152642	35.4252	22.5263
chr4	150136600	150137174	1.60992	5.2047	5.61646e-07	64.4298	21.1083	0.65273	5.6677	0.00314022	63.7371	40.5416
chr17	70488747	70489329	1.27552	4.08995	0.00311044	26.4962	10.945	0.64832	4.42899	0.0195073	26.9675	17.2059
chr18	35171838	35172514	1.27552	4.08995	0.00311044	26.4962	10.945	0.64832	4.42899	0.0195073	26.9675	17.2059
chr2	173553755	173554254	1.27552	4.08995	0.00311044	26.4962	10.945	0.64832	4.42899	0.0195073	26.9675	17.2059
chr9	59959286	59959702	1.27552	4.08995	0.00311044	26.4962	10.945	0.64832	4.42899	0.0195073	26.9675	17.2059
chr1	152015515	152016151	2.02388	5.09491	2.57227e-09	68.92	16.9472	0.64743	5.77369	0.00288411	68.47	43.7126
chr10	75036720	75037470	1.20627	5.5239	1.15853e-05	69.8912	30.29	0.64743	5.77369	0.00288411	68.47	43.7126
chrX	103481354	103482190	1.01417	5.97491	1.55625e-05	89.3874	44.2568	0.64452	6.112	0.00110685	86.4779	55.3205
chr9	123638571	123639173	1.60215	4.24593	0.000217976	33.0596	10.8894	0.64418	4.74593	0.0116813	33.5448	21.4638
chr10	62847333	62847982	1.2046	3.56464	0.0116399	17.9628	7.79387	0.6429	3.89068	0.0328572	18.5343	11.8699
chr10	125370008	125370519	1.66719	3.32193	0.00401127	17.8212	5.6113	0.6429	3.89068	0.0328572	18.5343	11.8699
chr11	50601579	50602274	1.02102	3.66096	0.0174598	18.0194	8.87934	0.6429	3.89068	0.0328572	18.5343	11.8699
chr13	17855459	17856066	1.66719	3.32193	0.00401127	17.8212	5.6113	0.6429	3.89068	0.0328572	18.5343	11.8699
chr13	32235039	32235347	-1.12112	4.78493	0.000886792	18.6922	40.6586	0.6429	3.89068	0.0328572	18.5343	11.8699
chr13	73718301	73718658	1.02102	3.66096	0.0174598	18.0194	8.87934	0.6429	3.89068	0.0328572	18.5343	11.8699
chr17	21696085	21696490	1.02102	3.66096	0.0174598	18.0194	8.87934	0.6429	3.89068	0.0328572	18.5343	11.8699
chr17	35544724	35545123	1.41653	3.45345	0.00716299	17.8978	6.70474	0.6429	3.89068	0.0328572	18.5343	11.8699
chr19	7595436	7595879	1.02102	3.66096	0.0174598	18.0194	8.87934	0.6429	3.89068	0.0328572	18.5343	11.8699
chr2	29391048	29391647	1.41653	3.45345	0.00716299	17.8978	6.70474	0.6429	3.89068	0.0328572	18.5343	11.8699
chr2	152085464	152085757	1.2046	3.56464	0.0116399	17.9628	7.79387	0.6429	3.89068	0.0328572	18.5343	11.8699
chr4	117070398	117071138	1.02102	3.66096	0.0174598	18.0194	8.87934	0.6429	3.89068	0.0328572	18.5343	11.8699
chr4	136802311	136802821	1.2046	3.56464	0.0116399	17.9628	7.79387	0.6429	3.89068	0.0328572	18.5343	11.8699
chr7	27460597	27460872	-1.04679	4.74593	0.00164332	18.6685	38.5677	0.6429	3.89068	0.0328572	18.5343	11.8699
chr8	122593245	122593794	-1.15683	4.80367	0.00064398	18.7037	41.7031	0.6429	3.89068	0.0328572	18.5343	11.8699
chr9	115760561	115761022	1.02102	3.66096	0.0174598	18.0194	8.87934	0.6429	3.89068	0.0328572	18.5343	11.8699
chr19	47330654	47331513	2.0154	4.29809	4.56181e-06	39.5552	9.7838	0.64228	5.00561	0.0112099	40.134	25.7139
chr6	108570840	108571728	1.48299	5.33665	8.16229e-07	67.5624	24.1702	0.64227	5.73584	0.00277647	66.578	42.6567
chr14	55114709	55115665	1.29029	4.90689	0.000117247	46.9169	19.1829	0.64154	5.22561	0.00700243	46.7332	29.9573
chr11	11876157	11876733	1.21233	5.14616	8.04941e-05	53.9043	23.2635	0.64145	5.41645	0.00539625	53.3409	34.1952
chr10	77476761	77477522	-1.69922	4.18316	0.000108988	10.0809	32.7352	0.63884	3.0222	0.0741882	10.1374	6.51054
chr11	96735962	96736232	2.02382	2.22972	0.0134277	9.4586	2.32592	0.63884	3.0222	0.0741882	10.1374	6.51054
chr12	17601297	17601593	1.46639	2.5222	0.0174561	9.54927	3.45576	0.63884	3.0222	0.0741882	10.1374	6.51054
chr13	91893032	91893456	1.46639	2.5222	0.0174561	9.54927	3.45576	0.63884	3.0222	0.0741882	10.1374	6.51054
chr16	21538993	21539208	1.46639	2.5222	0.0174561	9.54927	3.45576	0.63884	3.0222	0.0741882	10.1374	6.51054
chr16	32138686	32138845	-1.27281	3.95943	0.00381633	10.0076	24.1816	0.63884	3.0222	0.0741882	10.1374	6.51054
chr16	92544295	92544565	1.07088	2.72972	0.0458221	9.61413	4.5766	0.63884	3.0222	0.0741882	10.1374	6.51054
chr18	69111395	69111808	2.02382	2.22972	0.0134277	9.4586	2.32592	0.63884	3.0222	0.0741882	10.1374	6.51054
chr3	86028677	86029182	1.07088	2.72972	0.0458221	9.61413	4.5766	0.63884	3.0222	0.0741882	10.1374	6.51054
chr3	144634724	144635492	-1.44856	4.05164	0.00126722	10.0378	27.3966	0.63884	3.0222	0.0741882	10.1374	6.51054
chr4	62454915	62455458	-1.44856	4.05164	0.00126722	10.0378	27.3966	0.63884	3.0222	0.0741882	10.1374	6.51054
chr5	66319389	66319653	1.07088	2.72972	0.0458221	9.61413	4.5766	0.63884	3.0222	0.0741882	10.1374	6.51054
chr8	25121950	25122264	2.02382	2.22972	0.0134277	9.4586	2.32592	0.63884	3.0222	0.0741882	10.1374	6.51054
chr8	67572347	67572687	-1.39244	4.0222	0.00184945	10.0281	26.326	0.63884	3.0222	0.0741882	10.1374	6.51054
chrX	159484318	159484555	1.07088	2.72972	0.0458221	9.61413	4.5766	0.63884	3.0222	0.0741882	10.1374	6.51054
chrX	162470053	162470686	-1.65261	4.15871	0.000167284	10.0729	31.6693	0.63884	3.0222	0.0741882	10.1374	6.51054
chr9	79810298	79811088	1.17542	5.60106	1.13322e-05	72.9468	32.2975	0.63799	5.8371	0.00255277	71.3128	45.8263
chr1	183845106	183845693	1.47436	3.87744	0.0022449	24.4985	8.81686	0.63652	4.33089	0.0234371	25.0919	16.1407
chr11	5432378	5432725	1.03654	4.10716	0.00673929	24.6828	12.0327	0.63652	4.33089	0.0234371	25.0919	16.1407
chr12	52782816	52783432	2.4273	3.37744	3.81377e-05	24.1022	4.48092	0.63652	4.33089	0.0234371	25.0919	16.1407
chr17	5425276	5425551	1.16758	4.03841	0.00437143	24.6275	10.9634	0.63652	4.33089	0.0234371	25.0919	16.1407
chr3	97211101	97211768	1.03654	4.10716	0.00673929	24.6828	12.0327	0.63652	4.33089	0.0234371	25.0919	16.1407
chr7	113765603	113766568	2.4273	3.37744	3.81377e-05	24.1022	4.48092	0.63652	4.33089	0.0234371	25.0919	16.1407
chrX	152147464	152147764	1.65794	3.78112	0.00122449	24.4217	7.73903	0.63652	4.33089	0.0234371	25.0919	16.1407
chr10	13446664	13447521	1.09727	5.15246	0.000249323	52.0236	24.3159	0.63482	5.36778	0.00636068	51.4532	33.1369
chr18	39020276	39021233	1.15838	5.1204	0.000157467	51.9692	23.283	0.63482	5.36778	0.00636068	51.4532	33.1369
chr1	64949195	64949854	1.5158	4.2047	0.000486643	31.181	10.9041	0.63428	4.6677	0.0139882	31.6654	20.4008
chr14	60520068	60520505	1.05322	4.44741	0.00363612	31.4289	15.1453	0.63428	4.6677	0.0139882	31.6654	20.4008
chr16	50402852	50403360	1.05322	4.44741	0.00363612	31.4289	15.1453	0.63428	4.6677	0.0139882	31.6654	20.4008
chr3	107863929	107864262	1.05322	4.44741	0.00363612	31.4289	15.1453	0.63428	4.6677	0.0139882	31.6654	20.4008
chr7	24859150	24859749	1.05322	4.44741	0.00363612	31.4289	15.1453	0.63428	4.6677	0.0139882	31.6654	20.4008
chr13	12468467	12469148	1.0167	4.98864	0.000919032	45.1604	22.3204	0.63408	5.16993	0.00827847	44.8479	28.8977
chr18	79109684	79110586	1.0167	4.98864	0.000919032	45.1604	22.3204	0.63408	5.16993	0.00827847	44.8479	28.8977
chrX	134141915	134142560	1.39055	4.79248	8.01911e-05	44.8724	17.1152	0.63408	5.16993	0.00827847	44.8479	28.8977
chr11	94189347	94190052	1.15244	4.67878	0.000947135	38.1866	17.1788	0.63377	4.94056	0.013248	38.2514	24.6527
chr7	75880611	75881183	1.15244	4.67878	0.000947135	38.1866	17.1788	0.63377	4.94056	0.013248	38.2514	24.6527
chrX	57325816	57326918	1.33602	4.58245	0.000346964	38.0668	15.0787	0.63377	4.94056	0.013248	38.2514	24.6527
chr11	72416797	72417193	1.16433	4.84674	0.000464264	43.0789	19.2205	0.62606	5.112	0.00977724	42.9633	27.8377
chr2	25465842	25466626	1.50984	4.66546	5.16126e-05	42.8249	15.038	0.62606	5.112	0.00977724	42.9633	27.8377
chr3	122704085	122704620	1.41499	4.71523	9.51607e-05	42.8945	16.086	0.62606	5.112	0.00977724	42.9633	27.8377
chr1	43065918	43066234	1.04545	3.48864	0.0219187	16.1265	7.81322	0.62573	3.74593	0.0399988	16.6655	10.8008
chr12	105777556	105778019	1.25737	3.37744	0.0146125	16.0681	6.72138	0.62573	3.74593	0.0399988	16.6655	10.8008
chr13	113269822	113270275	2.21032	2.87744	0.00092411	15.8082	3.41595	0.62573	3.74593	0.0399988	16.6655	10.8008
chr14	70346388	70346591	1.25737	3.37744	0.0146125	16.0681	6.72138	0.62573	3.74593	0.0399988	16.6655	10.8008
chr17	32025454	32025716	1.25737	3.37744	0.0146125	16.0681	6.72138	0.62573	3.74593	0.0399988	16.6655	10.8008
chr17	88466370	88467042	-1.12736	4.62869	0.00130877	16.7375	36.5646	0.62573	3.74593	0.0399988	16.6655	10.8008
chr2	145226036	145226448	1.50803	3.24593	0.00889456	15.9993	5.62523	0.62573	3.74593	0.0399988	16.6655	10.8008
chr4	119667291	119667820	1.04545	3.48864	0.0219187	16.1265	7.81322	0.62573	3.74593	0.0399988	16.6655	10.8008
chr5	74159920	74160266	1.81481	3.08496	0.00485158	15.9156	4.52387	0.62573	3.74593	0.0399988	16.6655	10.8008
chr5	118763253	118763718	1.04545	3.48864	0.0219187	16.1265	7.81322	0.62573	3.74593	0.0399988	16.6655	10.8008
chr9	79898889	79899224	1.81481	3.08496	0.00485158	15.9156	4.52387	0.62573	3.74593	0.0399988	16.6655	10.8008
chr5	67426728	67428241	1.16562	4.59615	0.00115055	36.2261	16.1486	0.62449	4.87242	0.0156352	36.3696	23.5911
chr5	139830730	139830997	1.29319	4.22972	0.00179595	29.3708	11.9847	0.62329	4.58496	0.0167437	29.7869	19.3374
chr10	90728427	90729071	1.05132	3.98289	0.00832654	22.762	10.9832	0.62308	4.22561	0.0281421	23.2176	15.0748
chr15	37038604	37039139	1.19617	3.90689	0.00538776	22.7056	9.90945	0.62308	4.22561	0.0281421	23.2176	15.0748
chr17	51370912	51371450	1.05132	3.98289	0.00832654	22.762	10.9832	0.62308	4.22561	0.0281421	23.2176	15.0748
chr2	13684229	13684837	1.75361	3.61441	0.00145359	22.49	6.66963	0.62308	4.22561	0.0281421	23.2176	15.0748
chr2	132879222	132879968	1.3581	3.82193	0.00326531	22.6428	8.83284	0.62308	4.22561	0.0281421	23.2176	15.0748
chr5	114345577	114345882	1.54168	3.72561	0.00183674	22.5717	7.75306	0.62308	4.22561	0.0281421	23.2176	15.0748
chr7	104167171	104167845	1.19617	3.90689	0.00538776	22.7056	9.90945	0.62308	4.22561	0.0281421	23.2176	15.0748
chr8	33831890	33832340	1.54168	3.72561	0.00183674	22.5717	7.75306	0.62308	4.22561	0.0281421	23.2176	15.0748
chr11	72041798	72042755	1.73833	5.62751	7.38458e-10	90.3015	27.0649	0.62189	6.15474	0.00120021	88.3821	57.4325
chr11	3335921	3336370	1.04696	5.7835	2.55321e-05	79.1755	38.3199	0.62148	5.95607	0.00200502	77.0013	50.0511
chr16	85173036	85174102	1.2439	5.28112	2.821e-05	59.8413	25.2668	0.61881	5.5736	0.00418465	59.015	38.4309
chr5	136513908	136514688	1.1856	5.13339	0.000112901	52.9365	23.2732	0.61568	5.40368	0.00657474	52.4008	34.1979
chr1	37307586	37308290	1.0861	4.55817	0.00218656	34.3258	16.1686	0.61433	4.80089	0.0184223	34.4887	22.5291
chr2	164184274	164184859	1.0861	4.55817	0.00218656	34.3258	16.1686	0.61433	4.80089	0.0184223	34.4887	22.5291
chr5	90608518	90609717	1.51043	4.7608	2.96358e-05	45.76	16.0621	0.61212	5.21103	0.00854842	45.7942	29.9601
chr11	76628610	76629025	1.32673	4.11441	0.00218883	27.4318	10.9362	0.61102	4.49718	0.0200299	27.9096	18.2733
chr12	58537965	58538651	1.47158	4.03841	0.00126722	27.3639	9.86703	0.61102	4.49718	0.0200299	27.9096	18.2733
chr17	5412707	5413279	1.63351	3.95345	0.000684983	27.2881	8.79503	0.61102	4.49718	0.0200299	27.9096	18.2733
chr18	5609761	5610637	1.63351	3.95345	0.000684983	27.2881	8.79503	0.61102	4.49718	0.0200299	27.9096	18.2733
chr2	25706537	25707364	2.63908	4.87242	1.70046e-12	73.1081	11.7361	0.61082	5.88863	0.00274342	73.2136	47.9419
chr15	66789046	66790122	2.21464	4.53841	9.06597e-08	50.0648	10.786	0.60811	5.35454	0.00636068	50.5135	33.1397
chr1	155564810	155565104	1.07022	3.84674	0.0103265	20.8482	9.92891	0.60761	4.112	0.0337599	21.3447	14.0082
chr1	164098325	164099033	1.23215	3.76178	0.00666229	20.7905	8.85019	0.60761	4.112	0.0337599	21.3447	14.0082
chr10	77969749	77970167	1.07022	3.84674	0.0103265	20.8482	9.92891	0.60761	4.112	0.0337599	21.3447	14.0082
chr19	3414025	3414855	1.41572	3.66546	0.00399737	20.7253	7.76828	0.60761	4.112	0.0337599	21.3447	14.0082
chr3	108787913	108788536	1.23215	3.76178	0.00666229	20.7905	8.85019	0.60761	4.112	0.0337599	21.3447	14.0082
chr4	45965748	45966116	1.41572	3.66546	0.00399737	20.7253	7.76828	0.60761	4.112	0.0337599	21.3447	14.0082
chr6	52273515	52274017	1.23215	3.76178	0.00666229	20.7905	8.85019	0.60761	4.112	0.0337599	21.3447	14.0082
chr7	16507333	16507830	1.07022	3.84674	0.0103265	20.8482	9.92891	0.60761	4.112	0.0337599	21.3447	14.0082
chr8	17412600	17413258	1.87831	3.42275	0.00110272	20.5619	5.59288	0.60761	4.112	0.0337599	21.3447	14.0082
chrX	169220054	169220543	1.41572	3.66546	0.00399737	20.7253	7.76828	0.60761	4.112	0.0337599	21.3447	14.0082
chr1	52267661	52267918	1.16326	2.37744	0.0402832	7.77624	3.47212	0.60727	2.74593	0.0785522	8.2796	5.43504
chr13	27904263	27904574	1.16326	2.37744	0.0402832	7.77624	3.47212	0.60727	2.74593	0.0785522	8.2796	5.43504
chr15	101472995	101473286	1.16326	2.37744	0.0402832	7.77624	3.47212	0.60727	2.74593	0.0785522	8.2796	5.43504
chr18	63782665	63782997	1.16326	2.37744	0.0402832	7.77624	3.47212	0.60727	2.74593	0.0785522	8.2796	5.43504
chr4	149947475	149947739	1.16326	2.37744	0.0402832	7.77624	3.47212	0.60727	2.74593	0.0785522	8.2796	5.43504
chr5	101811837	101812101	1.16326	2.37744	0.0402832	7.77624	3.47212	0.60727	2.74593	0.0785522	8.2796	5.43504
chr5	124633430	124633800	1.60806	5.27103	3.25296e-07	67.418	22.1158	0.60698	5.75365	0.00350213	66.5856	43.7182
chr1	33610213	33610712	-1.03836	4.40368	0.00490086	14.769	30.3339	0.60483	3.58496	0.0487083	14.7985	9.73072
chr1	89108601	89109049	1.07945	3.29248	0.0277233	14.2433	6.74003	0.60483	3.58496	0.0487083	14.7985	9.73072
chr10	84060670	84061133	2.03239	2.79248	0.00259399	14.0129	3.42543	0.60483	3.58496	0.0487083	14.7985	9.73072
chr12	77309404	77309891	1.33011	3.16096	0.0184822	14.1823	5.64084	0.60483	3.58496	0.0487083	14.7985	9.73072
chr18	25668089	25668437	1.33011	3.16096	0.0184822	14.1823	5.64084	0.60483	3.58496	0.0487083	14.7985	9.73072
chr19	45301137	45301369	1.07945	3.29248	0.0277233	14.2433	6.74003	0.60483	3.58496	0.0487083	14.7985	9.73072
chr6	53287971	53288412	1.07945	3.29248	0.0277233	14.2433	6.74003	0.60483	3.58496	0.0487083	14.7985	9.73072
chr7	115538932	115539398	1.33011	3.16096	0.0184822	14.1823	5.64084	0.60483	3.58496	0.0487083	14.7985	9.73072
chr9	50471473	50471903	1.07945	3.29248	0.0277233	14.2433	6.74003	0.60483	3.58496	0.0487083	14.7985	9.73072
chr9	82854113	82854367	1.07945	3.29248	0.0277233	14.2433	6.74003	0.60483	3.58496	0.0487083	14.7985	9.73072
chr9	103146736	103147100	1.07945	3.29248	0.0277233	14.2433	6.74003	0.60483	3.58496	0.0487083	14.7985	9.73072
chr6	5442403	5443511	1.54233	4.68097	3.46039e-05	43.7781	15.0304	0.60343	5.15474	0.0100684	43.9093	28.9005
chr9	15035963	15036715	1.87388	4.50701	3.87456e-06	43.5303	11.8768	0.60343	5.15474	0.0100684	43.9093	28.9005
chr11	55158773	55159173	1.00216	4.51809	0.00400542	32.4279	16.1898	0.60316	4.72561	0.0144424	32.6088	21.4666
chr16	43698770	43699551	1.30894	4.35712	0.00103748	32.2581	13.02	0.60316	4.72561	0.0144424	32.6088	21.4666
chr2	30718993	30719325	1.55959	4.22561	0.000326964	32.12	10.8966	0.60316	4.72561	0.0144424	32.6088	21.4666
chr12	86680581	86681149	2.30248	4.43518	9.0517e-08	48.0485	9.74015	0.60003	5.30367	0.00748991	48.6268	32.0811
chr6	118593204	118594377	1.20468	5.01118	0.00016324	48.9598	21.2419	0.60003	5.30367	0.00748991	48.6268	32.0811
chr13	38151022	38152078	1.51065	4.45345	0.00015759	36.9824	12.9791	0.59781	4.92275	0.0159817	37.3142	24.6555
chr3	115682332	115683436	2.25166	4.06464	3.0632e-06	36.5164	7.66779	0.59781	4.92275	0.0159817	37.3142	24.6555
chr12	12400877	12401351	1.09148	4.13339	0.00492487	25.6188	12.0224	0.59722	4.40368	0.0239408	26.0333	17.2087
chr13	8641921	8642533	1.36736	3.98864	0.00267143	25.4982	9.88306	0.59722	4.40368	0.0239408	26.0333	17.2087
chr13	78186211	78186780	1.36736	3.98864	0.00267143	25.4982	9.88306	0.59722	4.40368	0.0239408	26.0333	17.2087
chr3	27652382	27653209	1.22251	4.06464	0.00311044	25.5615	10.954	0.59722	4.40368	0.0239408	26.0333	17.2087
chr7	114044009	114044560	2.17546	3.56464	0.000171429	25.148	5.56705	0.59722	4.40368	0.0239408	26.0333	17.2087
chr4	135565372	135566132	1.04666	5.99043	8.59355e-06	91.3768	44.2344	0.59566	6.16797	0.00151061	88.3895	58.4911
chr18	39067212	39068687	1.0578	5.35454	0.000161071	59.0326	28.3572	0.59552	5.56206	0.0050906	58.074	38.4337
chr15	79511414	79512024	1.80819	4.47564	9.52035e-06	41.6354	11.8889	0.59406	5.09615	0.0118429	42.025	27.8406
chr5	46794150	46794758	1.38179	4.69937	0.000138709	41.9403	16.0943	0.59406	5.09615	0.0118429	42.025	27.8406
chr5	65960009	65960663	1.0568	4.86989	0.000998168	42.1743	20.273	0.59406	5.09615	0.0118429	42.025	27.8406
chr9	123087416	123088371	2.42958	4.1496	4.00549e-07	41.1949	7.64657	0.59406	5.09615	0.0118429	42.025	27.8406
chr12	36046073	36046707	1.03011	5.48649	0.000124963	64.0685	31.3727	0.59403	5.67575	0.00478509	62.803	41.6063
chr7	19817246	19817816	1.84772	4.61441	3.51054e-06	46.4714	12.9112	0.59138	5.25092	0.00880951	46.7407	31.0222
chr5	113910084	113910476	1.06399	5.86417	1.30945e-05	84.2246	40.2851	0.59091	6.05768	0.00191387	81.7497	54.2755
chr4	32385533	32385990	1.00812	4.42587	0.00490086	30.4831	15.156	0.59081	4.64616	0.0172163	30.7298	20.4037
chr9	69125374	69126038	1.00812	4.42587	0.00490086	30.4831	15.156	0.59081	4.64616	0.0172163	30.7298	20.4037
chr1	161063062	161063695	1.2783	3.59984	0.00827042	18.8826	7.78493	0.58956	3.98864	0.0404396	19.4732	12.9408
chr11	88849859	88850204	1.2783	3.59984	0.00827042	18.8826	7.78493	0.58956	3.98864	0.0404396	19.4732	12.9408
chr15	51911752	51912070	1.2783	3.59984	0.00827042	18.8826	7.78493	0.58956	3.98864	0.0404396	19.4732	12.9408
chr17	25595228	25595911	1.2783	3.59984	0.00827042	18.8826	7.78493	0.58956	3.98864	0.0404396	19.4732	12.9408
chr2	70508965	70509722	2.04767	3.19616	0.00126672	18.6356	4.50749	0.58956	3.98864	0.0404396	19.4732	12.9408
chr3	63898591	63899614	1.09472	3.69616	0.0128651	18.9421	8.86915	0.58956	3.98864	0.0404396	19.4732	12.9408
chr3	75308023	75308610	2.44317	2.98864	0.000183582	18.5099	3.40358	0.58956	3.98864	0.0404396	19.4732	12.9408
chr3	96327119	96327490	1.09472	3.69616	0.0128651	18.9421	8.86915	0.58956	3.98864	0.0404396	19.4732	12.9408
chr3	106976402	106976954	1.74089	3.35712	0.002639	18.7337	5.60486	0.58956	3.98864	0.0404396	19.4732	12.9408
chr3	151294026	151294304	2.04767	3.19616	0.00126672	18.6356	4.50749	0.58956	3.98864	0.0404396	19.4732	12.9408
chr4	137853897	137854243	1.09472	3.69616	0.0128651	18.9421	8.86915	0.58956	3.98864	0.0404396	19.4732	12.9408
chr17	11788227	11789091	1.22234	5.08684	9.65797e-05	51.9124	22.249	0.58944	5.39068	0.00795085	51.4608	34.2008
chr11	5149015	5150070	1.00827	5.33089	0.000294672	57.0843	28.3791	0.58804	5.51809	0.00596792	56.1848	37.3766
chr2	34961445	34962044	1.17019	5.24593	7.81894e-05	56.9263	25.2959	0.58804	5.51809	0.00596792	56.1848	37.3766
chr10	85386548	85387289	1.41073	5.2409	4.47541e-06	61.66	23.1917	0.58704	5.63515	0.00558344	60.9125	40.55
chr10	89791616	89792415	1.01137	6.49982	5.77907e-07	128.49	63.7406	0.58681	6.64458	0.00045779	122.614	81.6383
chr14	55392374	55393010	1.22124	4.52764	0.000999569	35.2184	15.1057	0.58667	4.85368	0.0187623	35.4328	23.5939
chr17	70728678	70729408	1.82867	4.20893	4.53353e-05	34.8542	9.8123	0.58667	4.85368	0.0187623	35.4328	23.5939
chr8	18767835	18768662	1.43316	4.41645	0.000342709	35.0909	12.9948	0.58667	4.85368	0.0187623	35.4328	23.5939
chr5	37041525	37042045	1.61989	4.50561	4.67067e-05	39.8238	12.9571	0.58393	5.03506	0.0139085	40.1416	26.7802
chr1	135036180	135036758	1.81285	3.6427	0.000947993	23.4112	6.66347	0.58157	4.30367	0.0285818	24.1584	16.1435
chr1	193513860	193514591	1.11057	4.01118	0.00607144	23.6943	10.9731	0.58157	4.30367	0.0285818	24.1584	16.1435
chr12	33129435	33129912	1.60093	3.7539	0.00183674	23.4963	7.74591	0.58157	4.30367	0.0285818	24.1584	16.1435
chr12	108217422	108218037	1.11057	4.01118	0.00607144	23.6943	10.9731	0.58157	4.30367	0.0285818	24.1584	16.1435
chr13	59460668	59461504	1.60093	3.7539	0.00183674	23.4963	7.74591	0.58157	4.30367	0.0285818	24.1584	16.1435
chr18	32376633	32377483	1.25542	3.93518	0.00381633	23.6356	9.90031	0.58157	4.30367	0.0285818	24.1584	16.1435
chr18	73659759	73660817	1.25542	3.93518	0.00381633	23.6356	9.90031	0.58157	4.30367	0.0285818	24.1584	16.1435
chr2	158445694	158446385	1.41735	3.85022	0.0022449	23.5702	8.8247	0.58157	4.30367	0.0285818	24.1584	16.1435
chr9	14770803	14771392	1.60093	3.7539	0.00183674	23.4963	7.74591	0.58157	4.30367	0.0285818	24.1584	16.1435
chr9	37146442	37147613	1.11057	4.01118	0.00607144	23.6943	10.9731	0.58157	4.30367	0.0285818	24.1584	16.1435
chrX	130212599	130213190	1.11057	4.01118	0.00607144	23.6943	10.9731	0.58157	4.30367	0.0285818	24.1584	16.1435
chr11	82973933	82974798	1.37831	4.94892	3.91776e-05	49.8001	19.1566	0.58089	5.34106	0.00772368	49.5737	33.1425
chr4	155164321	155164969	1.86	4.83267	4.80164e-07	54.292	14.9562	0.58012	5.47272	0.006988	54.2962	36.3193
chr1	33645681	33645923	-1.24007	4.30735	0.00207915	12.8823	30.4293	0.57877	3.40368	0.0592971	12.9337	8.65956
chr1	169917980	169918412	1.83068	2.69616	0.00694275	12.2228	3.43621	0.57877	3.40368	0.0592971	12.9337	8.65956
chr13	41825409	41825831	1.43518	2.90368	0.0236053	12.3058	4.5507	0.57877	3.40368	0.0592971	12.9337	8.65956
chr13	51115781	51116216	1.1284	3.06464	0.035408	12.3706	5.65859	0.57877	3.40368	0.0592971	12.9337	8.65956
chr16	20794752	20795054	1.1284	3.06464	0.035408	12.3706	5.65859	0.57877	3.40368	0.0592971	12.9337	8.65956
chr16	95243432	95243738	1.83068	2.69616	0.00694275	12.2228	3.43621	0.57877	3.40368	0.0592971	12.9337	8.65956
chr18	32281566	32281841	1.1284	3.06464	0.035408	12.3706	5.65859	0.57877	3.40368	0.0592971	12.9337	8.65956
chr3	19706914	19707258	3.34106	1.90368	0.000793457	11.9109	1.1754	0.57877	3.40368	0.0592971	12.9337	8.65956
chr8	14992782	14993134	1.83068	2.69616	0.00694275	12.2228	3.43621	0.57877	3.40368	0.0592971	12.9337	8.65956
chr8	120832030	120832410	1.1284	3.06464	0.035408	12.3706	5.65859	0.57877	3.40368	0.0592971	12.9337	8.65956
chr11	64600311	64601001	2.32921	3.63806	3.91419e-05	27.9091	5.55374	0.57706	4.56206	0.0205024	28.8518	19.3402
chr11	74408732	74409280	1.01557	4.32732	0.00445533	28.5437	14.1187	0.57706	4.56206	0.0205024	28.8518	19.3402
chr14	121034956	121036258	1.01557	4.32732	0.00445533	28.5437	14.1187	0.57706	4.56206	0.0205024	28.8518	19.3402
chr2	30711556	30712432	1.12561	4.26958	0.00400634	28.49	13.0572	0.57706	4.56206	0.0205024	28.8518	19.3402
chr2	165285669	165285895	1.24523	4.20681	0.00254061	28.4317	11.9936	0.57706	4.56206	0.0205024	28.8518	19.3402
chr5	144276921	144277793	1.12561	4.26958	0.00400634	28.49	13.0572	0.57706	4.56206	0.0205024	28.8518	19.3402
chr5	147563733	147564549	1.37627	4.13806	0.00152436	28.3681	10.9278	0.57706	4.56206	0.0205024	28.8518	19.3402
chr6	83086168	83087132	1.12561	4.26958	0.00400634	28.49	13.0572	0.57706	4.56206	0.0205024	28.8518	19.3402
chr6	129284350	129284960	1.24523	4.20681	0.00254061	28.4317	11.9936	0.57706	4.56206	0.0205024	28.8518	19.3402
chr1	156076325	156076942	1.04471	4.53841	0.00297372	33.3766	16.179	0.57444	4.78112	0.0184223	33.5523	22.5319
chr1	161717878	161718669	1.747	4.16993	0.000108988	32.9778	9.82479	0.57444	4.78112	0.0184223	33.5523	22.5319
chr3	58503409	58504167	1.13956	4.48864	0.00194202	33.3224	15.125	0.57444	4.78112	0.0184223	33.5523	22.5319
chr17	75464889	75465773	1.48299	5.33665	8.16229e-07	67.5624	24.1702	0.57253	5.77103	0.00435821	66.593	44.7795
chr1	136254752	136255640	1.31417	5.31468	9.74431e-06	62.7595	25.2392	0.57214	5.6649	0.00574211	61.8614	41.6092
chr16	19760022	19761399	1.49775	5.21836	1.63388e-06	62.5626	22.1538	0.57214	5.6649	0.00574211	61.8614	41.6092
chr4	128688431	128689480	1.25805	5.34413	1.66778e-05	62.8198	26.2656	0.57214	5.6649	0.00574211	61.8614	41.6092
chr13	94868497	94868995	1.09	4.88574	0.000731216	43.1337	20.2626	0.57212	5.13922	0.0121373	42.9708	28.9034
chr13	107837216	107837849	1.01948	4.92275	0.00111423	43.1858	21.3033	0.57212	5.13922	0.0121373	42.9708	28.9034
chr8	125862291	125862968	1.01948	4.92275	0.00111423	43.1858	21.3033	0.57212	5.13922	0.0121373	42.9708	28.9034
chr1	164073563	164074242	1.39878	4.87994	4.64103e-05	47.8132	18.1331	0.57175	5.28966	0.00906186	47.6874	32.084
chr13	15759145	15760305	1.3202	4.92118	8.18287e-05	47.8775	19.1739	0.57175	5.28966	0.00906186	47.6874	32.084
chr11	106366005	106366885	1.38715	5.02764	2.27536e-05	52.7543	20.169	0.57169	5.42587	0.00817147	52.4082	35.2616
chr3	103255871	103256684	1.62341	4.90368	3.33643e-06	52.5414	17.0532	0.57169	5.42587	0.00817147	52.4082	35.2616
chr11	32445697	32446307	1.5897	3.28493	0.00601691	16.9097	5.61808	0.56821	3.85368	0.0402765	17.6034	11.8727
chr11	82976911	82977597	1.12712	3.52764	0.0161167	17.0441	7.80328	0.56821	3.85368	0.0402765	17.6034	11.8727
chr12	44438793	44439481	1.33905	3.41645	0.0103147	16.9824	6.71283	0.56821	3.85368	0.0402765	17.6034	11.8727
chr12	85574709	85575383	1.12712	3.52764	0.0161167	17.0441	7.80328	0.56821	3.85368	0.0402765	17.6034	11.8727
chr16	29894694	29894979	1.12712	3.52764	0.0161167	17.0441	7.80328	0.56821	3.85368	0.0402765	17.6034	11.8727
chr2	76042043	76042599	1.12712	3.52764	0.0161167	17.0441	7.80328	0.56821	3.85368	0.0402765	17.6034	11.8727
chr3	11035082	11035367	1.89648	3.12396	0.00313926	16.8211	4.51812	0.56821	3.85368	0.0402765	17.6034	11.8727
chr3	55828834	55829256	1.12712	3.52764	0.0161167	17.0441	7.80328	0.56821	3.85368	0.0402765	17.6034	11.8727
chr5	24739162	24739546	1.5897	3.28493	0.00601691	16.9097	5.61808	0.56821	3.85368	0.0402765	17.6034	11.8727
chr5	29479276	29479606	1.89648	3.12396	0.00313926	16.8211	4.51812	0.56821	3.85368	0.0402765	17.6034	11.8727
chr6	17806526	17806883	-1.04569	4.6677	0.00199951	17.6898	36.5181	0.56821	3.85368	0.0402765	17.6034	11.8727
chr7	120777946	120778550	-1.08554	4.68861	0.00147332	17.7019	37.5665	0.56821	3.85368	0.0402765	17.6034	11.8727
chr7	130669115	130669797	1.12712	3.52764	0.0161167	17.0441	7.80328	0.56821	3.85368	0.0402765	17.6034	11.8727
chr15	101973717	101974048	1.15764	5.35022	5.42183e-05	60.9283	27.3108	0.56446	5.62396	0.00667823	59.9711	40.5529
chr15	78260692	78261253	1.29644	3.79248	0.00469388	21.7162	8.84133	0.56365	4.19616	0.0340668	22.2847	15.0776
chr15	93743680	93744626	1.48001	3.69616	0.00272548	21.6481	7.76051	0.56365	4.19616	0.0340668	22.2847	15.0776
chr16	38466743	38467408	-1.04726	5.0222	0.000758776	22.6049	46.7154	0.56365	4.19616	0.0340668	22.2847	15.0776
chr10	81257140	81258217	1.61889	4.98505	1.92349e-06	55.5032	18.071	0.56357	5.50596	0.00718717	55.2441	37.3796
chr14	17660007	17661287	1.54031	5.02628	3.79637e-06	55.5779	19.1083	0.56357	5.50596	0.00718717	55.2441	37.3796
chr9	56089716	56090791	1.61889	4.98505	1.92349e-06	55.5032	18.071	0.56357	5.50596	0.00718717	55.2441	37.3796
chr9	61336883	61337771	1.13066	5.10716	0.000218354	51.0023	23.2931	0.56273	5.37744	0.00795085	50.5209	34.2037
chr15	8627050	8627664	1.11492	4.96832	0.000439537	46.0707	21.2716	0.56196	5.23635	0.0106166	45.8017	31.0251
chr15	101221570	101222082	1.93683	4.53707	2.45389e-06	45.4272	11.8651	0.56196	5.23635	0.0106166	45.8017	31.0251
chr3	52972860	52973284	1.33835	4.85109	9.7624e-05	45.8949	18.1502	0.56196	5.23635	0.0106166	45.8017	31.0251
chr3	107953158	107953994	1.11492	4.96832	0.000439537	46.0707	21.2716	0.56196	5.23635	0.0106166	45.8017	31.0251
chr1	155244042	155244852	1.27552	4.08995	0.00311044	26.4962	10.945	0.56166	4.47272	0.0243842	26.975	18.2762
chr11	106588545	106589162	1.02487	4.22147	0.00547208	26.6102	13.0777	0.56166	4.47272	0.0243842	26.975	18.2762
chr16	57336752	57337387	1.02487	4.22147	0.00547208	26.6102	13.0777	0.56166	4.47272	0.0243842	26.975	18.2762
chr16	91366512	91367458	1.14449	4.15871	0.00355685	26.5557	12.0125	0.56166	4.47272	0.0243842	26.975	18.2762
chr2	35540827	35541273	2.53524	3.42899	1.27614e-05	25.9311	4.47339	0.56166	4.47272	0.0243842	26.975	18.2762
chr5	139466783	139467292	1.14449	4.15871	0.00355685	26.5557	12.0125	0.56166	4.47272	0.0243842	26.975	18.2762
chr6	39191502	39191877	1.42037	4.01395	0.00184945	26.4306	9.8749	0.56166	4.47272	0.0243842	26.975	18.2762
chr11	117292427	117292982	1.09718	4.81468	0.000886792	41.1628	19.2406	0.56134	5.07994	0.0142114	41.0869	27.8434
chr15	100635234	100635597	1.44269	4.63339	0.00011278	40.9202	15.0537	0.56134	5.07994	0.0142114	41.0869	27.8434
chr2	164563311	164564141	1.26515	4.33621	0.00147553	31.3151	13.0289	0.56096	4.7047	0.0176518	31.6729	21.4695
chr10	84369693	84370881	1.4724	4.43518	0.000233233	36.0364	12.9869	0.56095	4.90448	0.019075	36.3771	24.6584
chr9	96787682	96788350	1.26047	4.54638	0.000708028	36.1673	15.0965	0.56095	4.90448	0.019075	36.3771	24.6584
chr12	84530264	84530718	-1.33419	3.30735	0.00889456	6.23445	15.7191	0.56031	2.40368	0.102539	6.42561	4.35756
chr13	34636020	34636336	-1.12226	3.19616	0.0184822	6.21188	13.5225	0.56031	2.40368	0.102539	6.42561	4.35756
chr18	12283558	12283864	-1.00263	3.13339	0.035408	6.19917	12.421	0.56031	2.40368	0.102539	6.42561	4.35756
chr19	5166919	5167159	-1.2323	3.2539	0.0129375	6.22359	14.6218	0.56031	2.40368	0.102539	6.42561	4.35756
chr2	126894852	126895276	-1.2323	3.2539	0.0129375	6.22359	14.6218	0.56031	2.40368	0.102539	6.42561	4.35756
chr8	72198029	72198282	-1.12226	3.19616	0.0184822	6.21188	13.5225	0.56031	2.40368	0.102539	6.42561	4.35756
chr9	25064125	25064520	-1.33419	3.30735	0.00889456	6.23445	15.7191	0.56031	2.40368	0.102539	6.42561	4.35756
chr9	36970704	36970956	2.294	1.40368	0.0273438	5.8591	1.19472	0.56031	2.40368	0.102539	6.42561	4.35756
chr9	57196512	57197015	-1.2323	3.2539	0.0129375	6.22359	14.6218	0.56031	2.40368	0.102539	6.42561	4.35756
chr9	78259760	78260101	2.294	1.40368	0.0273438	5.8591	1.19472	0.56031	2.40368	0.102539	6.42561	4.35756
chr1	66845283	66846260	1.15122	5.17823	0.000130803	53.9607	24.2955	0.55479	5.46018	0.0083856	53.3558	36.3222
chr3	50443145	50444473	1.03659	5.23837	0.000317952	54.0667	26.3563	0.55479	5.46018	0.0083856	53.3558	36.3222
chr4	119076391	119077706	1.48822	5.00141	8.42726e-06	53.6504	19.1238	0.55479	5.46018	0.0083856	53.3558	36.3222
chr2	6871893	6873089	1.60019	4.80367	8.78266e-06	48.6295	16.0396	0.55316	5.32732	0.00930564	48.6341	33.1454
chr15	12193599	12195259	1.32094	6.53372	1.6221e-10	146.442	58.617	0.55263	6.85065	0.000346924	139.776	95.2957
chr17	23543354	23543549	1.12249	4.90126	0.000531794	44.0938	20.2523	0.55145	5.18097	0.0124177	43.9166	29.9659
chr16	45653772	45654494	1.02691	4.78112	0.00164332	39.2488	19.2617	0.54967	5.01809	0.0166072	39.2038	26.7831
chr2	31256487	31256950	1.02691	4.78112	0.00164332	39.2488	19.2617	0.54967	5.01809	0.0166072	39.2038	26.7831
chr17	44162372	44162891	1.64353	4.26569	0.000144249	33.9999	10.8824	0.54784	4.83444	0.0222603	34.4961	23.5968
chr7	128042107	128043095	1.39288	4.39721	0.000499785	34.1461	13.003	0.54784	4.83444	0.0222603	34.4961	23.5968
chr5	29893619	29894252	1.72763	4.95345	9.35754e-07	56.3858	17.0256	0.54778	5.53841	0.00738137	56.1921	38.4396
chr5	147657835	147658719	1.64428	4.99718	1.92349e-06	56.4663	18.0639	0.54778	5.53841	0.00738137	56.1921	38.4396
chr14	61529383	61529982	1.06353	4.35022	0.00445533	29.4865	14.1082	0.54601	4.62396	0.0209296	29.7944	20.4066
chr2	52315695	52316180	1.17357	4.29248	0.00290114	29.431	13.0475	0.54601	4.62396	0.0209296	29.7944	20.4066
chr2	128395970	128396365	1.42422	4.16096	0.00105129	29.305	10.9196	0.54601	4.62396	0.0209296	29.7944	20.4066
chr2	164173418	164173746	1.29319	4.22972	0.00179595	29.3708	11.9847	0.54601	4.62396	0.0209296	29.7944	20.4066
chr8	68613182	68613635	1.06353	4.35022	0.00445533	29.4865	14.1082	0.54601	4.62396	0.0209296	29.7944	20.4066
chr11	8821173	8821889	1.22234	5.08684	9.65797e-05	51.9124	22.249	0.54546	5.41288	0.00976819	51.4681	35.2646
chr5	145098098	145098946	1.35993	5.01464	3.30395e-05	51.7903	20.1775	0.54546	5.41288	0.00976819	51.4681	35.2646
chr12	108121340	108121630	1.20232	2.79248	0.0333252	10.5096	4.56724	0.54519	3.19616	0.0720806	11.0713	7.58718
chr14	43880261	43880945	-1.07742	3.98864	0.00832654	10.9278	23.0605	0.54519	3.19616	0.0720806	11.0713	7.58718
chr16	3839320	3839897	1.20232	2.79248	0.0333252	10.5096	4.56724	0.54519	3.19616	0.0720806	11.0713	7.58718
chr17	25507857	25508099	1.20232	2.79248	0.0333252	10.5096	4.56724	0.54519	3.19616	0.0720806	11.0713	7.58718
chr18	20713436	20714085	2.15526	2.29248	0.00805664	10.3396	2.32117	0.54519	3.19616	0.0720806	11.0713	7.58718
chr19	44207157	44207402	1.59783	2.58496	0.0174561	10.4387	3.44869	0.54519	3.19616	0.0720806	11.0713	7.58718
chr2	165360928	165361267	1.20232	2.79248	0.0333252	10.5096	4.56724	0.54519	3.19616	0.0720806	11.0713	7.58718
chr3	27461127	27461395	1.20232	2.79248	0.0333252	10.5096	4.56724	0.54519	3.19616	0.0720806	11.0713	7.58718
chr7	114672780	114673053	1.20232	2.79248	0.0333252	10.5096	4.56724	0.54519	3.19616	0.0720806	11.0713	7.58718
chr8	121474842	121475167	1.59783	2.58496	0.0174561	10.4387	3.44869	0.54519	3.19616	0.0720806	11.0713	7.58718
chr9	42432221	42432611	1.59783	2.58496	0.0174561	10.4387	3.44869	0.54519	3.19616	0.0720806	11.0713	7.58718
chrX	94544983	94545231	1.20232	2.79248	0.0333252	10.5096	4.56724	0.54519	3.19616	0.0720806	11.0713	7.58718
chr12	82489077	82489550	1.16758	4.03841	0.00437143	24.6275	10.9634	0.54427	4.37744	0.0289517	25.0994	17.2116
chr6	34473370	34473699	-1.01731	5.1848	0.000575935	25.5658	51.7488	0.54427	4.37744	0.0289517	25.0994	17.2116
chr9	15538934	15539453	1.31243	3.96241	0.00267143	24.5665	9.89152	0.54427	4.37744	0.0289517	25.0994	17.2116
chr1	181009783	181010216	1.5605	3.5222	0.00330817	19.7318	6.68972	0.54288	4.07994	0.0405118	20.4125	14.011
chr10	43089751	43090430	1.81116	3.39068	0.00171535	19.6473	5.59873	0.54288	4.07994	0.0405118	20.4125	14.011
chr12	91749559	91749822	1.34858	3.63339	0.0057893	19.8035	7.77641	0.54288	4.07994	0.0405118	20.4125	14.011
chr13	49767804	49768640	1.00307	3.81468	0.0139908	19.9209	9.9393	0.54288	4.07994	0.0405118	20.4125	14.011
chr15	84995883	84996457	1.5605	3.5222	0.00330817	19.7318	6.68972	0.54288	4.07994	0.0405118	20.4125	14.011
chr17	87745885	87746938	1.165	3.72972	0.0093272	19.8658	8.85945	0.54288	4.07994	0.0405118	20.4125	14.011
chr18	66441941	66442408	1.165	3.72972	0.0093272	19.8658	8.85945	0.54288	4.07994	0.0405118	20.4125	14.011
chr2	153929933	153930288	1.165	3.72972	0.0093272	19.8658	8.85945	0.54288	4.07994	0.0405118	20.4125	14.011
chr3	101670388	101671162	1.165	3.72972	0.0093272	19.8658	8.85945	0.54288	4.07994	0.0405118	20.4125	14.011
chr4	56843149	56843395	1.5605	3.5222	0.00330817	19.7318	6.68972	0.54288	4.07994	0.0405118	20.4125	14.011
chr7	77326739	77327292	1.00307	3.81468	0.0139908	19.9209	9.9393	0.54288	4.07994	0.0405118	20.4125	14.011
chr8	88453916	88454714	2.11794	3.22972	0.000791699	19.5444	4.50256	0.54288	4.07994	0.0405118	20.4125	14.011
chr10	60036891	60037306	-1.13036	4.54373	0.00159306	15.7639	34.5093	0.5425	3.7047	0.0485699	15.7355	10.8036
chr11	22752540	22753034	1.42169	3.2047	0.0129375	15.0902	5.6328	0.5425	3.7047	0.0485699	15.7355	10.8036
chr12	82369630	82370126	1.42169	3.2047	0.0129375	15.0902	5.6328	0.5425	3.7047	0.0485699	15.7355	10.8036
chr13	17534480	17534940	1.72847	3.04373	0.00739288	15.0112	4.52996	0.5425	3.7047	0.0485699	15.7355	10.8036
chr13	117311520	117312072	1.17103	3.33621	0.0203304	15.1551	6.73042	0.5425	3.7047	0.0485699	15.7355	10.8036
chr15	60875797	60876107	1.72847	3.04373	0.00739288	15.0112	4.52996	0.5425	3.7047	0.0485699	15.7355	10.8036
chr17	73008802	73009395	1.17103	3.33621	0.0203304	15.1551	6.73042	0.5425	3.7047	0.0485699	15.7355	10.8036
chr18	39374452	39374895	1.17103	3.33621	0.0203304	15.1551	6.73042	0.5425	3.7047	0.0485699	15.7355	10.8036
chr2	65414253	65414709	1.17103	3.33621	0.0203304	15.1551	6.73042	0.5425	3.7047	0.0485699	15.7355	10.8036
chr2	145832320	145832850	2.68141	2.54373	0.000518799	14.7683	2.30222	0.5425	3.7047	0.0485699	15.7355	10.8036
chr3	151438373	151438920	1.72847	3.04373	0.00739288	15.0112	4.52996	0.5425	3.7047	0.0485699	15.7355	10.8036
chr7	116091936	116092171	-1.04163	4.49718	0.00400542	15.74	32.4016	0.5425	3.7047	0.0485699	15.7355	10.8036
chr8	121871909	121872326	1.42169	3.2047	0.0129375	15.0902	5.6328	0.5425	3.7047	0.0485699	15.7355	10.8036
chr17	24463470	24464106	1.13113	4.83089	0.00064398	42.1206	19.2305	0.54012	5.12337	0.0144973	42.0324	28.9063
chr9	41149350	41150592	1.20246	6.18738	9.21271e-08	110.555	48.0396	0.53955	6.46435	0.00142131	106.457	73.2408
chr11	59397235	59398389	1.14013	6.03506	1.33146e-06	97.351	44.1701	0.53775	6.2873	0.00224818	94.1032	64.8224
chr4	148130330	148131038	1.4006	4.51118	0.000287038	37.0521	14.0343	0.53698	4.95345	0.0193625	37.3215	25.7224
chr12	85697909	85698813	1.00216	4.51809	0.00400542	32.4279	16.1898	0.53342	4.7608	0.0219775	32.6161	22.5349
chr12	113185659	113186189	1.09701	4.46832	0.00267028	32.3753	15.135	0.53342	4.7608	0.0219775	32.6161	22.5349
chr14	19839411	19840352	1.70444	4.1496	0.000167284	32.0405	9.83131	0.53342	4.7608	0.0219775	32.6161	22.5349
chr2	130256753	130257307	1.00216	4.51809	0.00400542	32.4279	16.1898	0.53342	4.7608	0.0219775	32.6161	22.5349
chr4	150173183	150173788	1.09701	4.46832	0.00267028	32.3753	15.135	0.53342	4.7608	0.0219775	32.6161	22.5349
chr6	51877008	51877533	1.30894	4.35712	0.00103748	32.2581	13.02	0.53342	4.7608	0.0219775	32.6161	22.5349
chr1	135850777	135851230	1.3072	4.83621	0.000140334	44.9365	18.159	0.53194	5.22147	0.0126848	44.8627	31.028
chr11	5151653	5152354	1.5649	5.25042	7.34656e-07	65.4748	22.1306	0.53093	5.75042	0.00620078	64.7086	44.7854
chr18	35932871	35933121	1.1957	4.18316	0.00355685	27.4934	12.0029	0.52932	4.53841	0.0247738	27.9169	19.3431
chr2	122701766	122702973	1.32673	4.11441	0.00218883	27.4318	10.9362	0.52932	4.53841	0.0247738	27.9169	19.3431
chr4	58552895	58553927	1.63351	3.95345	0.000684983	27.2881	8.79503	0.52932	4.53841	0.0247738	27.9169	19.3431
chr4	138407473	138408480	1.32673	4.11441	0.00218883	27.4318	10.9362	0.52932	4.53841	0.0247738	27.9169	19.3431
chr6	37045982	37046711	1.81709	3.85712	0.000342491	27.2025	7.71987	0.52932	4.53841	0.0247738	27.9169	19.3431
chr7	104103859	104104734	1.47158	4.03841	0.00126722	27.3639	9.86703	0.52932	4.53841	0.0247738	27.9169	19.3431
chrX	101889927	101890571	1.63351	3.95345	0.000684983	27.2881	8.79503	0.52932	4.53841	0.0247738	27.9169	19.3431
chr4	97640304	97641068	1.06597	5.19616	0.000282534	53.045	25.337	0.52902	5.44741	0.00998735	52.4155	36.3252
chr2	26571460	26572300	1.00751	5.42899	0.000202793	61.0851	30.3839	0.52733	5.6427	0.00810929	59.9783	41.6151
chr10	121305448	121306080	1.3581	3.82193	0.00326531	22.6428	8.83284	0.52447	4.27537	0.0342982	23.225	16.1464
chr14	33202898	33203248	2.70655	3.11441	3.42727e-05	22.1262	3.38965	0.52447	4.27537	0.0342982	23.225	16.1464
chr14	59625130	59625750	2.31104	3.32193	0.000111386	22.2765	4.48904	0.52447	4.27537	0.0342982	23.225	16.1464
chr4	125024062	125024591	1.75361	3.61441	0.00145359	22.49	6.66963	0.52447	4.27537	0.0342982	23.225	16.1464
chr4	136454642	136455372	1.05132	3.98289	0.00832654	22.762	10.9832	0.52447	4.27537	0.0342982	23.225	16.1464
chr17	28349995	28351484	1.06275	6.17809	1.59411e-06	104.653	50.099	0.52365	6.39293	0.00183607	100.758	70.0884
chr11	101968600	101969229	1.22124	4.52764	0.000999569	35.2184	15.1057	0.52313	4.88574	0.0225147	35.4401	24.6613
chr11	121125633	121126291	1.12638	4.57741	0.00159306	35.2757	16.1584	0.52313	4.88574	0.0225147	35.4401	24.6613
chr13	52045921	52046666	1.22124	4.52764	0.000999569	35.2184	15.1057	0.52313	4.88574	0.0225147	35.4401	24.6613
chr17	6467651	6468465	1.55279	4.35368	0.000185634	35.0192	11.9363	0.52313	4.88574	0.0225147	35.4401	24.6613
chr3	98417198	98417991	2.17418	4.02764	8.24278e-06	34.6487	7.67705	0.52313	4.88574	0.0225147	35.4401	24.6613
chrX	50549824	50550779	1.03766	4.62396	0.00243645	35.3293	17.2095	0.52313	4.88574	0.0225147	35.4401	24.6613
chr1	182633651	182634268	1.69085	5.31057	6.1094e-08	71.3081	22.0873	0.5223	5.87619	0.00575577	70.3921	49.0112
chr18	5146191	5147491	1.15541	5.59151	1.57572e-05	71.9645	32.3076	0.5223	5.87619	0.00575577	70.3921	49.0112
chr4	55532136	55533148	1.01881	6.12869	4.70104e-06	99.6018	49.1557	0.52047	6.32485	0.00236999	96.0083	66.9317
chr13	52530272	52530988	1.01948	4.92275	0.00111423	43.1858	21.3033	0.52013	5.16546	0.014767	42.978	29.9688
chr9	61666090	61666597	1.61173	4.612	2.66962e-05	42.7503	13.9882	0.52013	5.16546	0.014767	42.978	29.9688
chr10	79798228	79798787	1.12871	5.6649	1.51862e-05	75.0225	34.3097	0.51857	5.93518	0.00510684	73.2354	51.1228
chr1	119476931	119477418	1.97396	3.16096	0.00200564	17.7279	4.51267	0.51852	3.95345	0.0404396	18.5418	12.9437
chr13	44795081	44795368	1.02102	3.66096	0.0174598	18.0194	8.87934	0.51852	3.95345	0.0404396	18.5418	12.9437
chr13	112153075	112153914	1.02102	3.66096	0.0174598	18.0194	8.87934	0.51852	3.95345	0.0404396	18.5418	12.9437
chr17	34712934	34713357	1.02102	3.66096	0.0174598	18.0194	8.87934	0.51852	3.95345	0.0404396	18.5418	12.9437
chr2	165364395	165364653	1.02102	3.66096	0.0174598	18.0194	8.87934	0.51852	3.95345	0.0404396	18.5418	12.9437
chr4	48539927	48541196	1.41653	3.45345	0.00716299	17.8978	6.70474	0.51852	3.95345	0.0404396	18.5418	12.9437
chr4	106778358	106778789	1.02102	3.66096	0.0174598	18.0194	8.87934	0.51852	3.95345	0.0404396	18.5418	12.9437
chr5	43837433	43837958	1.02102	3.66096	0.0174598	18.0194	8.87934	0.51852	3.95345	0.0404396	18.5418	12.9437
chr5	103659654	103659892	1.02102	3.66096	0.0174598	18.0194	8.87934	0.51852	3.95345	0.0404396	18.5418	12.9437
chr5	106784999	106785454	1.66719	3.32193	0.00401127	17.8212	5.6113	0.51852	3.95345	0.0404396	18.5418	12.9437
chr5	138694287	138695062	1.97396	3.16096	0.00200564	17.7279	4.51267	0.51852	3.95345	0.0404396	18.5418	12.9437
chr6	83095662	83096401	1.02102	3.66096	0.0174598	18.0194	8.87934	0.51852	3.95345	0.0404396	18.5418	12.9437
chr6	100365732	100366607	1.97396	3.16096	0.00200564	17.7279	4.51267	0.51852	3.95345	0.0404396	18.5418	12.9437
chr6	121191609	121192304	2.92691	2.66096	0.000163078	17.4411	2.29344	0.51852	3.95345	0.0404396	18.5418	12.9437
chr6	144670473	144671191	1.66719	3.32193	0.00401127	17.8212	5.6113	0.51852	3.95345	0.0404396	18.5418	12.9437
chr7	120098454	120098722	1.02102	3.66096	0.0174598	18.0194	8.87934	0.51852	3.95345	0.0404396	18.5418	12.9437
chr8	25132531	25132964	1.2046	3.56464	0.0116399	17.9628	7.79387	0.51852	3.95345	0.0404396	18.5418	12.9437
chrX	50588889	50589223	1.97396	3.16096	0.00200564	17.7279	4.51267	0.51852	3.95345	0.0404396	18.5418	12.9437
chr12	72670753	72671458	1.47071	4.18316	0.000718378	30.2427	10.9117	0.51749	4.68316	0.0213154	30.7371	21.4724
chr13	52105897	52106606	1.11001	4.37242	0.00326724	30.43	14.0979	0.51749	4.68316	0.0213154	30.7371	21.4724
chr16	31209738	31210761	1.00812	4.42587	0.00490086	30.4831	15.156	0.51749	4.68316	0.0213154	30.7371	21.4724
chr2	155755649	155756123	1.11001	4.37242	0.00326724	30.43	14.0979	0.51749	4.68316	0.0213154	30.7371	21.4724
chr6	54939486	54940118	1.61556	4.10716	0.000385471	30.1678	9.84493	0.51749	4.68316	0.0213154	30.7371	21.4724
chr9	78038795	78039506	1.11001	4.37242	0.00326724	30.43	14.0979	0.51749	4.68316	0.0213154	30.7371	21.4724
chr10	17575484	17576457	1.06909	4.72251	0.00147332	38.2411	18.2264	0.51458	5.0007	0.0196267	38.2661	26.7861
chr11	117018284	117018854	1.24117	4.63222	0.000585502	38.1287	16.1296	0.51458	5.0007	0.0196267	38.2661	26.7861
chr1	40085556	40086295	1.02863	5.61711	7.17921e-05	70.104	34.3632	0.51436	5.84084	0.00663318	68.4994	47.9566
chr9	21781595	21782585	1.18106	5.3614	3.89148e-05	61.9029	27.3008	0.51372	5.67215	0.00827932	60.9269	42.6741
chr15	33537420	33538157	2.21271	4.39232	4.05907e-07	45.2132	9.75378	0.51351	5.2608	0.012939	45.8088	32.0899
chr16	16584143	16585010	1.09271	5.20893	0.000206669	54.0148	25.3264	0.51336	5.48109	0.0101987	53.3629	37.3855
chr1	65282798	65283124	1.23262	3.11441	0.0258751	13.2757	5.64941	0.51086	3.53841	0.05845	13.8695	9.73362
chr1	135280743	135281003	1.23262	3.11441	0.0258751	13.2757	5.64941	0.51086	3.53841	0.05845	13.8695	9.73362
chr11	33725655	33726063	1.5394	2.95345	0.0163422	13.2062	4.54332	0.51086	3.53841	0.05845	13.8695	9.73362
chr12	84299182	84299767	-1.08585	4.33089	0.00445533	13.8131	29.32	0.51086	3.53841	0.05845	13.8695	9.73362
chr13	83552098	83552910	-1.03397	4.30367	0.00600951	13.8008	28.2592	0.51086	3.53841	0.05845	13.8695	9.73362
chr13	108956110	108956529	2.49234	2.45345	0.00160217	12.9926	2.30901	0.51086	3.53841	0.05845	13.8695	9.73362
chr14	54939405	54939693	1.23262	3.11441	0.0258751	13.2757	5.64941	0.51086	3.53841	0.05845	13.8695	9.73362
chr15	89251860	89252581	-1.27578	4.43054	0.000856774	13.8581	33.5545	0.51086	3.53841	0.05845	13.8695	9.73362
chr17	26264764	26265111	-1.08585	4.33089	0.00445533	13.8131	29.32	0.51086	3.53841	0.05845	13.8695	9.73362
chr19	4468432	4468826	1.9349	2.74593	0.00427246	13.1171	3.43063	0.51086	3.53841	0.05845	13.8695	9.73362
chr2	129087060	129087485	-1.31943	4.45345	0.000599741	13.8684	34.611	0.51086	3.53841	0.05845	13.8695	9.73362
chr3	14965395	14965984	-1.13585	4.35712	0.00326724	13.8249	30.38	0.51086	3.53841	0.05845	13.8695	9.73362
chr4	56957557	56957888	1.5394	2.95345	0.0163422	13.2062	4.54332	0.51086	3.53841	0.05845	13.8695	9.73362
chr8	110130536	110130887	1.5394	2.95345	0.0163422	13.2062	4.54332	0.51086	3.53841	0.05845	13.8695	9.73362
chrX	99690821	99691439	1.23262	3.11441	0.0258751	13.2757	5.64941	0.51086	3.53841	0.05845	13.8695	9.73362
chrX	106120311	106120590	1.23262	3.11441	0.0258751	13.2757	5.64941	0.51086	3.53841	0.05845	13.8695	9.73362
chrX	164197652	164198178	-1.18409	4.38244	0.00237138	13.8363	31.439	0.51086	3.53841	0.05845	13.8695	9.73362
chr17	64754123	64754835	2.48223	3.40368	2.21198e-05	25.0163	4.47709	0.51057	4.44741	0.029261	26.0406	18.2791
chr3	30245844	30247289	1.22251	4.06464	0.00311044	25.5615	10.954	0.51057	4.44741	0.029261	26.0406	18.2791
chr3	40510271	40511110	1.22251	4.06464	0.00311044	25.5615	10.954	0.51057	4.44741	0.029261	26.0406	18.2791
chr4	141363106	141363683	1.22251	4.06464	0.00311044	25.5615	10.954	0.51057	4.44741	0.029261	26.0406	18.2791
chr5	147188529	147189054	1.09148	4.13339	0.00492487	25.6188	12.0224	0.51057	4.44741	0.029261	26.0406	18.2791
chr7	139272465	139273637	1.09148	4.13339	0.00492487	25.6188	12.0224	0.51057	4.44741	0.029261	26.0406	18.2791
chrX	167200800	167201807	2.17546	3.56464	0.000171429	25.148	5.56705	0.51057	4.44741	0.029261	26.0406	18.2791
chr2	60978638	60979416	1.00741	5.52083	0.000139862	65.0976	32.3822	0.50967	5.73989	0.00732819	63.7665	44.7884
chr4	75266760	75267516	1.47111	4.31468	0.000408704	33.1339	11.9515	0.50795	4.81468	0.0222603	33.5596	23.5998
chr6	99990980	99991668	1.04471	4.53841	0.00297372	33.3766	16.179	0.50795	4.81468	0.0222603	33.5596	23.5998
chr11	79535631	79535953	1.65462	4.5222	3.07581e-05	40.772	12.9501	0.5074	5.10716	0.0171517	41.094	28.9093
chr14	30586492	30587163	1.34784	4.68316	0.000200889	40.9866	16.1028	0.5074	5.10716	0.0171517	41.094	28.9093
chr7	97355039	97355768	1.02285	4.85368	0.00135236	41.2152	20.2838	0.5074	5.10716	0.0171517	41.094	28.9093
chr2	35660999	35662535	1.56507	5.1126	1.46217e-06	59.5132	20.1132	0.5044	5.63134	0.00954034	59.0368	41.6181
chr11	87055518	87056779	-1.14245	5.00771	0.00036358	21.6528	47.7997	0.50168	4.16546	0.0405118	21.352	15.0806
chr11	95981057	95981517	1.07022	3.84674	0.0103265	20.8482	9.92891	0.50168	4.16546	0.0405118	21.352	15.0806
chr13	113429687	113430434	1.07022	3.84674	0.0103265	20.8482	9.92891	0.50168	4.16546	0.0405118	21.352	15.0806
chr16	14705284	14706000	1.41572	3.66546	0.00399737	20.7253	7.76828	0.50168	4.16546	0.0405118	21.352	15.0806
chr2	120068782	120069414	1.41572	3.66546	0.00399737	20.7253	7.76828	0.50168	4.16546	0.0405118	21.352	15.0806
chr3	14583773	14584252	1.23215	3.76178	0.00666229	20.7905	8.85019	0.50168	4.16546	0.0405118	21.352	15.0806
chr8	117596597	117597243	3.13803	2.76178	2.75373e-05	20.1233	2.28591	0.50168	4.16546	0.0405118	21.352	15.0806
chr9	32445661	32446117	1.23215	3.76178	0.00666229	20.7905	8.85019	0.50168	4.16546	0.0405118	21.352	15.0806
chr9	95961094	95961334	1.07022	3.84674	0.0103265	20.8482	9.92891	0.50168	4.16546	0.0405118	21.352	15.0806
chr1	74172597	74173485	1.05197	4.93826	0.000823014	44.147	21.2925	0.50129	5.20628	0.0150214	43.9237	31.0311
chr15	10713991	10715413	1.05197	4.93826	0.000823014	44.147	21.2925	0.50129	5.20628	0.0150214	43.9237	31.0311
chr12	102308028	102309064	1.59202	4.37242	0.000123756	35.9627	11.929	0.50012	4.93518	0.0227432	36.3842	25.7254
chr12	116077308	116078247	1.72306	4.30367	6.18781e-05	35.8821	10.8689	0.50012	4.93518	0.0227432	36.3842	25.7254
chr19	47168251	47168687	1.07689	4.6427	0.0017935	36.2811	17.199	0.50012	4.93518	0.0227432	36.3842	25.7254
chr1	90906430	90906675	1.32241	2.45345	0.0268555	8.66171	3.46352	0.50007	2.95345	0.0872803	9.21178	6.5134
chr10	71368201	71368885	-1.93192	4.16096	2.0149e-05	9.15782	34.9428	0.50007	2.95345	0.0872803	9.21178	6.5134
chr12	85951911	85952127	1.87985	2.16096	0.0134277	8.57947	2.33115	0.50007	2.95345	0.0872803	9.21178	6.5134
chr16	95964472	95964709	1.32241	2.45345	0.0268555	8.66171	3.46352	0.50007	2.95345	0.0872803	9.21178	6.5134
chr17	73743981	73744267	1.32241	2.45345	0.0268555	8.66171	3.46352	0.50007	2.95345	0.0872803	9.21178	6.5134
chr2	91544106	91544503	-1.28576	3.82193	0.00469388	9.05711	22.0821	0.50007	2.95345	0.0872803	9.21178	6.5134
chr3	66503731	66504322	-1.14091	3.74593	0.0093272	9.03468	19.9232	0.50007	2.95345	0.0872803	9.21178	6.5134
chr3	97967728	97967958	-1.06232	3.7047	0.0128651	9.02254	18.8417	0.50007	2.95345	0.0872803	9.21178	6.5134
chr6	25767133	25767377	1.32241	2.45345	0.0268555	8.66171	3.46352	0.50007	2.95345	0.0872803	9.21178	6.5134
chr6	100094697	100095222	-1.14091	3.74593	0.0093272	9.03468	19.9232	0.50007	2.95345	0.0872803	9.21178	6.5134
chr7	46535405	46535798	1.32241	2.45345	0.0268555	8.66171	3.46352	0.50007	2.95345	0.0872803	9.21178	6.5134
chr7	72400113	72400366	1.32241	2.45345	0.0268555	8.66171	3.46352	0.50007	2.95345	0.0872803	9.21178	6.5134
chr9	45589922	45590185	1.32241	2.45345	0.0268555	8.66171	3.46352	0.50007	2.95345	0.0872803	9.21178	6.5134
chrX	96419268	96419770	-1.4779	3.92275	0.00152653	9.08694	25.3111	0.50007	2.95345	0.0872803	9.21178	6.5134
chrX	167497828	167498088	2.83279	1.66096	0.00878906	8.44068	1.18474	0.50007	2.95345	0.0872803	9.21178	6.5134
chr1	89089620	89090619	1.37627	4.13806	0.00152436	28.3681	10.9278	0.49978	4.60106	0.0251155	28.859	20.4095
chr1	161392902	161393247	1.12561	4.26958	0.00400634	28.49	13.0572	0.49978	4.60106	0.0251155	28.859	20.4095
chr11	24162086	24162395	1.12561	4.26958	0.00400634	28.49	13.0572	0.49978	4.60106	0.0251155	28.859	20.4095
chr2	101905661	101906298	1.24523	4.20681	0.00254061	28.4317	11.9936	0.49978	4.60106	0.0251155	28.859	20.4095
chr8	33767022	33767345	1.12561	4.26958	0.00400634	28.49	13.0572	0.49978	4.60106	0.0251155	28.859	20.4095
chr1	92359313	92360632	1.11898	5.22147	0.000150304	54.9849	25.3161	0.49842	5.51395	0.0104025	54.3105	38.4456
chr12	81905688	81906644	1.23861	5.15871	5.70776e-05	54.8724	23.2539	0.49842	5.51395	0.0104025	54.3105	38.4456
chr12	98269559	98270732	1.67642	4.92899	2.1934e-06	54.4628	17.0391	0.49842	5.51395	0.0104025	54.3105	38.4456
chr4	88513647	88514356	1.11898	5.22147	0.000150304	54.9849	25.3161	0.49842	5.51395	0.0104025	54.3105	38.4456
chr2	130538952	130539599	1.29029	4.90689	0.000117247	46.9169	19.1829	0.49605	5.29903	0.0131809	46.7551	33.1514
chr14	102981409	102983486	1.50066	5.96241	1.62408e-09	104.89	37.0673	0.49453	6.42118	0.00227893	101.719	72.1992
chr15	100260374	100260818	1.18884	4.69616	0.000679994	39.1402	17.169	0.49361	5.04638	0.0198693	39.2109	27.8494
chr6	34987804	34988730	1.37242	4.59984	0.000240206	39.0174	15.0702	0.49361	5.04638	0.0198693	39.2109	27.8494
chr3	101923768	101924886	1.72382	4.76764	2.81045e-06	49.5065	14.9879	0.49153	5.38616	0.0115855	49.5881	35.2706
chr18	55548050	55549522	1.26515	4.33621	0.00147553	31.3151	13.0289	0.49122	4.73989	0.0259021	31.68	22.5379
chr5	32015911	32016595	1.1551	4.39395	0.00237138	31.3741	14.088	0.49122	4.73989	0.0259021	31.68	22.5379
chr6	48443815	48445006	1.1551	4.39395	0.00237138	31.3741	14.088	0.49122	4.73989	0.0259021	31.68	22.5379
chr1	134232901	134233455	1.04545	3.48864	0.0219187	16.1265	7.81322	0.48949	3.81468	0.0483319	16.6728	11.8756
chr11	54727173	54727881	1.25737	3.37744	0.0146125	16.0681	6.72138	0.48949	3.81468	0.0483319	16.6728	11.8756
chr12	91640604	91641187	1.04545	3.48864	0.0219187	16.1265	7.81322	0.48949	3.81468	0.0483319	16.6728	11.8756
chr12	117427256	117427851	1.25737	3.37744	0.0146125	16.0681	6.72138	0.48949	3.81468	0.0483319	16.6728	11.8756
chr16	46022111	46022942	1.04545	3.48864	0.0219187	16.1265	7.81322	0.48949	3.81468	0.0483319	16.6728	11.8756
chr19	36056803	36057818	1.50803	3.24593	0.00889456	15.9993	5.62523	0.48949	3.81468	0.0483319	16.6728	11.8756
chr2	173426352	173427134	1.81481	3.08496	0.00485158	15.9156	4.52387	0.48949	3.81468	0.0483319	16.6728	11.8756
chr3	94851745	94852091	1.04545	3.48864	0.0219187	16.1265	7.81322	0.48949	3.81468	0.0483319	16.6728	11.8756
chr4	8921944	8922462	1.50803	3.24593	0.00889456	15.9993	5.62523	0.48949	3.81468	0.0483319	16.6728	11.8756
chr4	32291601	32291971	1.04545	3.48864	0.0219187	16.1265	7.81322	0.48949	3.81468	0.0483319	16.6728	11.8756
chr5	106886869	106887395	-1.04402	4.58496	0.00327984	16.7136	34.4629	0.48949	3.81468	0.0483319	16.6728	11.8756
chr7	79934915	79935497	1.25737	3.37744	0.0146125	16.0681	6.72138	0.48949	3.81468	0.0483319	16.6728	11.8756
chrX	166238795	166239535	2.76775	2.58496	0.000291824	15.6581	2.29913	0.48949	3.81468	0.0483319	16.6728	11.8756
chr10	8195665	8196622	1.41735	3.85022	0.0022449	23.5702	8.8247	0.48932	4.35022	0.0344663	24.1656	17.2146
chr12	85097470	85097782	1.41735	3.85022	0.0022449	23.5702	8.8247	0.48932	4.35022	0.0344663	24.1656	17.2146
chr14	25116309	25117132	1.11057	4.01118	0.00607144	23.6943	10.9731	0.48932	4.35022	0.0344663	24.1656	17.2146
chr15	53902164	53902823	1.60093	3.7539	0.00183674	23.4963	7.74591	0.48932	4.35022	0.0344663	24.1656	17.2146
chr2	172773300	172773680	1.25542	3.93518	0.00381633	23.6356	9.90031	0.48932	4.35022	0.0344663	24.1656	17.2146
chr6	137575039	137575664	1.41735	3.85022	0.0022449	23.5702	8.8247	0.48932	4.35022	0.0344663	24.1656	17.2146
chr7	35086291	35086951	1.11057	4.01118	0.00607144	23.6943	10.9731	0.48932	4.35022	0.0344663	24.1656	17.2146
chr9	23268601	23269459	1.25542	3.93518	0.00381633	23.6356	9.90031	0.48932	4.35022	0.0344663	24.1656	17.2146
chr9	103449008	103450070	1.25542	3.93518	0.00381633	23.6356	9.90031	0.48932	4.35022	0.0344663	24.1656	17.2146
chr4	40218005	40218988	1.0568	4.86989	0.000998168	42.1743	20.273	0.48813	5.1496	0.0173967	42.0394	29.9719
chr12	108333556	108334606	1.07878	6.48757	1.38946e-07	130.414	61.7418	0.48466	6.71836	0.00131849	124.559	89.0179
chr10	95415608	95416017	1.0861	4.55817	0.00218656	34.3258	16.1686	0.4843	4.86651	0.0225147	34.5032	24.6644
chr11	109479657	109480258	1.28284	4.45495	0.000856774	34.2104	14.06	0.4843	4.86651	0.0225147	34.5032	24.6644
chr18	80606283	80606770	1.78838	4.18969	7.05216e-05	33.9157	9.81846	0.4843	4.86651	0.0225147	34.5032	24.6644
chr8	13036139	13036968	1.5125	4.33444	0.000276477	34.0762	11.9438	0.4843	4.86651	0.0225147	34.5032	24.6644
chr16	78459767	78460852	1.14481	5.2338	0.000108702	55.9554	25.3059	0.48414	5.54605	0.0125862	55.2583	39.5054
chr2	3117935	3118984	1.26443	5.17104	4.02601e-05	55.841	23.2446	0.48414	5.54605	0.0125862	55.2583	39.5054
chr6	94283413	94284474	1.0167	4.98864	0.000919032	45.1604	22.3204	0.48348	5.24593	0.0152613	44.8697	32.093
chr1	144269179	144269467	-1.37987	2.82193	0.0208282	4.38322	11.4071	0.48161	1.95345	0.109375	4.57652	3.2776
chr10	39924603	39924937	-1.07309	2.66096	0.0436401	4.36027	9.17374	0.48161	1.95345	0.109375	4.57652	3.2776
chr13	75877987	75878277	-1.63053	2.95345	0.00583649	4.40207	13.63	0.48161	1.95345	0.109375	4.57652	3.2776
chr16	76786502	76787013	-2.02604	3.16096	0.000872016	4.43196	18.0507	0.48161	1.95345	0.109375	4.57652	3.2776
chr16	96684675	96684896	-1.37987	2.82193	0.0208282	4.38322	11.4071	0.48161	1.95345	0.109375	4.57652	3.2776
chr2	102091593	102091827	-1.07309	2.66096	0.0436401	4.36027	9.17374	0.48161	1.95345	0.109375	4.57652	3.2776
chr4	31878562	31879077	-1.93731	3.11441	0.00142694	4.42524	16.9482	0.48161	1.95345	0.109375	4.57652	3.2776
chr5	90652780	90653062	-1.07309	2.66096	0.0436401	4.36027	9.17374	0.48161	1.95345	0.109375	4.57652	3.2776
chr6	116128772	116129010	-1.07309	2.66096	0.0436401	4.36027	9.17374	0.48161	1.95345	0.109375	4.57652	3.2776
chr7	142146122	142146336	-1.07309	2.66096	0.0436401	4.36027	9.17374	0.48161	1.95345	0.109375	4.57652	3.2776
chr8	18649293	18649520	-1.07309	2.66096	0.0436401	4.36027	9.17374	0.48161	1.95345	0.109375	4.57652	3.2776
chrX	77581569	77582048	-1.93731	3.11441	0.00142694	4.42524	16.9482	0.48161	1.95345	0.109375	4.57652	3.2776
chr1	125662925	125663598	1.02487	4.22147	0.00547208	26.6102	13.0777	0.47996	4.51395	0.0295177	26.9821	19.3461
chr1	130633835	130634509	1.14449	4.15871	0.00355685	26.5557	12.0125	0.47996	4.51395	0.0295177	26.9821	19.3461
chr11	53054127	53054652	2.22846	3.58995	0.000105495	26.0676	5.56246	0.47996	4.51395	0.0295177	26.9821	19.3461
chr13	37312160	37312933	1.02487	4.22147	0.00547208	26.6102	13.0777	0.47996	4.51395	0.0295177	26.9821	19.3461
chr2	135536335	135536803	1.5823	3.92899	0.00102747	26.3575	8.80205	0.47996	4.51395	0.0295177	26.9821	19.3461
chr4	11368176	11368865	2.22846	3.58995	0.000105495	26.0676	5.56246	0.47996	4.51395	0.0295177	26.9821	19.3461
chr4	150015328	150015876	2.22846	3.58995	0.000105495	26.0676	5.56246	0.47996	4.51395	0.0295177	26.9821	19.3461
chr7	83655278	83655661	1.5823	3.92899	0.00102747	26.3575	8.80205	0.47996	4.51395	0.0295177	26.9821	19.3461
chr7	114453276	114453689	1.02487	4.22147	0.00547208	26.6102	13.0777	0.47996	4.51395	0.0295177	26.9821	19.3461
chr9	71896009	71896697	1.02487	4.22147	0.00547208	26.6102	13.0777	0.47996	4.51395	0.0295177	26.9821	19.3461
chrX	153036880	153038019	1.97781	3.72147	0.000248666	26.1797	6.64638	0.47996	4.51395	0.0295177	26.9821	19.3461
chr5	113643258	113643843	2.06808	4.16096	7.82817e-06	36.6313	8.7357	0.47863	4.98289	0.0229481	37.3285	26.7892
chr8	70276386	70276829	1.29872	4.56464	0.000497533	37.1168	15.0875	0.47863	4.98289	0.0229481	37.3285	26.7892
chr9	45505430	45506124	1.03093	5.44017	0.000150459	62.0621	30.3728	0.47842	5.68996	0.00987874	60.9338	43.736
chr9	70009714	70010278	1.07918	5.41486	9.81256e-05	62.0109	29.3497	0.47842	5.68996	0.00987874	60.9338	43.736
chr1	74807958	74808597	1.06955	5.13922	0.000341178	51.0557	24.3264	0.47607	5.42118	0.0118032	50.535	36.3313
chr4	129244488	129245455	1.13066	5.10716	0.000218354	51.0023	23.2931	0.47607	5.42118	0.0118032	50.535	36.3313
chr12	17253084	17253481	1.09472	3.69616	0.0128651	18.9421	8.86915	0.47515	4.04638	0.047661	19.4804	14.0141
chr12	40152505	40153017	1.2783	3.59984	0.00827042	18.8826	7.78493	0.47515	4.04638	0.047661	19.4804	14.0141
chr14	120378471	120378852	1.49023	3.48864	0.00490099	18.8143	6.69704	0.47515	4.04638	0.047661	19.4804	14.0141
chr15	89572160	89572550	1.49023	3.48864	0.00490099	18.8143	6.69704	0.47515	4.04638	0.047661	19.4804	14.0141
chr18	75224021	75224397	1.49023	3.48864	0.00490099	18.8143	6.69704	0.47515	4.04638	0.047661	19.4804	14.0141
chr3	30416426	30417355	1.74089	3.35712	0.002639	18.7337	5.60486	0.47515	4.04638	0.047661	19.4804	14.0141
chr6	136661460	136662085	2.44317	2.98864	0.000183582	18.5099	3.40358	0.47515	4.04638	0.047661	19.4804	14.0141
chr7	34398796	34399389	1.09472	3.69616	0.0128651	18.9421	8.86915	0.47515	4.04638	0.047661	19.4804	14.0141
chr7	58743551	58744248	1.09472	3.69616	0.0128651	18.9421	8.86915	0.47515	4.04638	0.047661	19.4804	14.0141
chr7	101541185	101541476	1.09472	3.69616	0.0128651	18.9421	8.86915	0.47515	4.04638	0.047661	19.4804	14.0141
chr7	110241988	110242650	1.09472	3.69616	0.0128651	18.9421	8.86915	0.47515	4.04638	0.047661	19.4804	14.0141
chr8	54228756	54229516	1.09472	3.69616	0.0128651	18.9421	8.86915	0.47515	4.04638	0.047661	19.4804	14.0141
chr9	63970714	63971202	1.2783	3.59984	0.00827042	18.8826	7.78493	0.47515	4.04638	0.047661	19.4804	14.0141
chr9	118512678	118512974	1.2783	3.59984	0.00827042	18.8826	7.78493	0.47515	4.04638	0.047661	19.4804	14.0141
chr11	106471489	106472109	1.06246	4.79809	0.00121195	40.2056	19.2511	0.47392	5.09058	0.020092	40.1558	28.9124
chr2	131171400	131171792	1.06246	4.79809	0.00121195	40.2056	19.2511	0.47392	5.09058	0.020092	40.1558	28.9124
chr6	145187226	145187940	1.50985	4.56335	9.00772e-05	39.8989	14.0104	0.47392	5.09058	0.020092	40.1558	28.9124
chr14	14515252	14515744	1.42422	4.16096	0.00105129	29.305	10.9196	0.47269	4.66096	0.0254145	29.8014	21.4755
chr1	135586855	135587335	1.32323	2.85022	0.0333252	11.4069	4.55864	0.47087	3.35022	0.0700784	12.0057	8.66252
chr11	46631704	46631964	1.71874	2.6427	0.0111084	11.33	3.4422	0.47087	3.35022	0.0700784	12.0057	8.66252
chr11	57868815	57869127	1.32323	2.85022	0.0333252	11.4069	4.55864	0.47087	3.35022	0.0700784	12.0057	8.66252
chr11	77147788	77148300	1.01645	3.01118	0.0472107	11.467	5.66847	0.47087	3.35022	0.0700784	12.0057	8.66252
chr11	97001035	97001618	-1.02047	4.07994	0.00910715	11.8737	24.0868	0.47087	3.35022	0.0700784	12.0057	8.66252
chr12	75709375	75709975	-1.14009	4.1427	0.00492487	11.8981	26.2227	0.47087	3.35022	0.0700784	12.0057	8.66252
chr14	27596318	27596640	1.32323	2.85022	0.0333252	11.4069	4.55864	0.47087	3.35022	0.0700784	12.0057	8.66252
chr16	33859964	33860386	1.01645	3.01118	0.0472107	11.467	5.66847	0.47087	3.35022	0.0700784	12.0057	8.66252
chr2	173416878	173417248	1.71874	2.6427	0.0111084	11.33	3.4422	0.47087	3.35022	0.0700784	12.0057	8.66252
chr3	33844118	33844467	2.27617	2.35022	0.00476074	11.2224	2.3168	0.47087	3.35022	0.0700784	12.0057	8.66252
chr6	72851616	72852035	1.01645	3.01118	0.0472107	11.467	5.66847	0.47087	3.35022	0.0700784	12.0057	8.66252
chr9	14885981	14886378	-1.02047	4.07994	0.00910715	11.8737	24.0868	0.47087	3.35022	0.0700784	12.0057	8.66252
chr9	96185119	96185515	1.01645	3.01118	0.0472107	11.467	5.66847	0.47087	3.35022	0.0700784	12.0057	8.66252
chr9	96756972	96757574	-1.5356	4.35022	0.000185634	11.9789	34.7278	0.47087	3.35022	0.0700784	12.0057	8.66252
chrX	13576667	13577047	1.32323	2.85022	0.0333252	11.4069	4.55864	0.47087	3.35022	0.0700784	12.0057	8.66252
chrX	142402797	142403521	-1.08158	4.112	0.00673929	11.8862	25.1553	0.47087	3.35022	0.0700784	12.0057	8.66252
chr2	116998721	116999379	1.00827	5.33089	0.000294672	57.0843	28.3791	0.47049	5.57741	0.0127616	56.2061	40.565
chr10	94426044	94426836	1.72177	4.55426	1.31139e-05	42.6699	12.9365	0.46998	5.19077	0.0176251	42.9849	31.0341
chr10	125488120	125488998	2.11727	4.34674	1.75638e-06	42.382	9.76829	0.46998	5.19077	0.0176251	42.9849	31.0341
chr2	168912995	168913894	1.09	4.88574	0.000731216	43.1337	20.2626	0.46998	5.19077	0.0176251	42.9849	31.0341
chr7	43354969	43355920	1.32626	4.76178	0.000167931	42.9597	17.1323	0.46998	5.19077	0.0176251	42.9849	31.0341
chr7	132866051	132866830	1.72177	4.55426	1.31139e-05	42.6699	12.9365	0.46998	5.19077	0.0176251	42.9849	31.0341
chr7	140946947	140947491	2.11727	4.34674	1.75638e-06	42.382	9.76829	0.46998	5.19077	0.0176251	42.9849	31.0341
chr13	8493200	8493853	1.30894	4.35712	0.00103748	32.2581	13.02	0.46693	4.79436	0.0260983	32.6231	23.6029
chr3	84937951	84938397	1.42856	4.29436	0.000599433	32.1921	11.9594	0.46693	4.79436	0.0260983	32.6231	23.6029
chr6	72993173	72993876	1.42856	4.29436	0.000599433	32.1921	11.9594	0.46693	4.79436	0.0260983	32.6231	23.6029
chr11	44455439	44455882	1.69194	3.58496	0.00145359	21.5697	6.67604	0.46503	4.24593	0.0404543	22.2918	16.1494
chr13	37279168	37279805	1.29644	3.79248	0.00469388	21.7162	8.84133	0.46503	4.24593	0.0404543	22.2918	16.1494
chr15	86411069	86411952	1.29644	3.79248	0.00469388	21.7162	8.84133	0.46503	4.24593	0.0404543	22.2918	16.1494
chr17	51358364	51358794	1.69194	3.58496	0.00145359	21.5697	6.67604	0.46503	4.24593	0.0404543	22.2918	16.1494
chr2	28546058	28546635	2.24938	3.29248	0.0001885	21.3649	4.49335	0.46503	4.24593	0.0404543	22.2918	16.1494
chr2	58136584	58136873	1.29644	3.79248	0.00469388	21.7162	8.84133	0.46503	4.24593	0.0404543	22.2918	16.1494
chr4	84976881	84977721	1.69194	3.58496	0.00145359	21.5697	6.67604	0.46503	4.24593	0.0404543	22.2918	16.1494
chr5	92897649	92898422	1.29644	3.79248	0.00469388	21.7162	8.84133	0.46503	4.24593	0.0404543	22.2918	16.1494
chr6	103473251	103473957	1.48001	3.69616	0.00272548	21.6481	7.76051	0.46503	4.24593	0.0404543	22.2918	16.1494
chr6	113001740	113002046	1.13451	3.87744	0.00751021	21.7765	9.91897	0.46503	4.24593	0.0404543	22.2918	16.1494
chr7	101868064	101868619	-1.32881	5.16993	2.82527e-05	22.7141	57.057	0.46503	4.24593	0.0404543	22.2918	16.1494
chr7	35118036	35119653	1.45903	5.69131	5.99682e-08	85.6764	31.1638	0.46502	6.15431	0.0053631	83.6806	60.6233
chr4	105157294	105158692	1.02946	5.53136	0.000103837	66.0776	32.371	0.46444	5.78398	0.00891397	64.7225	46.9079
chr7	127295854	127296945	1.12115	5.48325	4.33438e-05	65.974	30.3301	0.46444	5.78398	0.00891397	64.7225	46.9079
chr8	3355363	3356047	1.42812	4.89395	3.17295e-05	48.773	18.1248	0.46379	5.37242	0.01363	48.6482	35.2737
chr2	148407220	148408504	1.68614	5.37242	3.54942e-08	74.3101	23.0924	0.46022	5.96463	0.00729615	73.2492	53.2429
chr1	38242370	38243267	1.24117	4.63222	0.000585502	38.1287	16.1296	0.45852	5.029	0.0231315	38.273	27.8525
chr5	72796092	72796968	1.15244	4.67878	0.000947135	38.1866	17.1788	0.45852	5.029	0.0231315	38.273	27.8525
chr1	62041557	62042152	1.47436	3.87744	0.0022449	24.4985	8.81686	0.45762	4.42118	0.0345812	25.1064	18.2822
chr11	57548948	57549444	1.47436	3.87744	0.0022449	24.4985	8.81686	0.45762	4.42118	0.0345812	25.1064	18.2822
chr11	83536740	83537413	1.47436	3.87744	0.0022449	24.4985	8.81686	0.45762	4.42118	0.0345812	25.1064	18.2822
chr3	75696018	75696713	1.16758	4.03841	0.00437143	24.6275	10.9634	0.45762	4.42118	0.0345812	25.1064	18.2822
chr1	126824492	126825425	1.25911	4.72972	0.000342692	41.0489	17.1503	0.45541	5.13339	0.0202962	41.1009	29.975
chr18	82633663	82634446	-1.08458	5.95943	5.60172e-06	42.7289	90.6178	0.45541	5.13339	0.0202962	41.1009	29.975
chr10	121350349	121351622	1.12496	5.43672	5.20562e-05	63.9645	29.3287	0.45447	5.74618	0.0101957	62.8313	45.8529
chr4	46597397	46597982	1.03011	5.48649	0.000124963	64.0685	31.3727	0.45447	5.74618	0.0101957	62.8313	45.8529
chr10	4126317	4127024	1.33011	3.16096	0.0184822	14.1823	5.64084	0.45423	3.66096	0.0575644	14.8057	10.8066
chr11	50256602	50257351	1.33011	3.16096	0.0184822	14.1823	5.64084	0.45423	3.66096	0.0575644	14.8057	10.8066
chr12	56541105	56541406	1.07945	3.29248	0.0277233	14.2433	6.74003	0.45423	3.66096	0.0575644	14.8057	10.8066
chr13	12356311	12356654	1.33011	3.16096	0.0184822	14.1823	5.64084	0.45423	3.66096	0.0575644	14.8057	10.8066
chr13	102070741	102071156	1.33011	3.16096	0.0184822	14.1823	5.64084	0.45423	3.66096	0.0575644	14.8057	10.8066
chr15	82235721	82236036	2.03239	2.79248	0.00259399	14.0129	3.42543	0.45423	3.66096	0.0575644	14.8057	10.8066
chr16	93552691	93553054	1.33011	3.16096	0.0184822	14.1823	5.64084	0.45423	3.66096	0.0575644	14.8057	10.8066
chr19	28770441	28770866	1.33011	3.16096	0.0184822	14.1823	5.64084	0.45423	3.66096	0.0575644	14.8057	10.8066
chr3	84604779	84605066	1.07945	3.29248	0.0277233	14.2433	6.74003	0.45423	3.66096	0.0575644	14.8057	10.8066
chr3	117438603	117439093	1.33011	3.16096	0.0184822	14.1823	5.64084	0.45423	3.66096	0.0575644	14.8057	10.8066
chr4	125990024	125990785	1.07945	3.29248	0.0277233	14.2433	6.74003	0.45423	3.66096	0.0575644	14.8057	10.8066
chr5	77027862	77028420	-1.52872	4.66096	5.16126e-05	14.8934	42.9719	0.45423	3.66096	0.0575644	14.8057	10.8066
chr5	102206988	102207458	2.03239	2.79248	0.00259399	14.0129	3.42543	0.45423	3.66096	0.0575644	14.8057	10.8066
chr6	97472635	97473503	2.03239	2.79248	0.00259399	14.0129	3.42543	0.45423	3.66096	0.0575644	14.8057	10.8066
chr7	88343870	88344411	1.63689	3	0.0110893	14.108	4.53643	0.45423	3.66096	0.0575644	14.8057	10.8066
chr9	40989901	40990395	1.07945	3.29248	0.0277233	14.2433	6.74003	0.45423	3.66096	0.0575644	14.8057	10.8066
chrX	20059303	20059750	1.33011	3.16096	0.0184822	14.1823	5.64084	0.45423	3.66096	0.0575644	14.8057	10.8066
chr3	136684209	136684961	2.49527	4.18097	1.4139e-07	43.0699	7.63875	0.45283	5.23074	0.0178379	43.9306	32.0961
chr10	4598321	4598737	1.47158	4.03841	0.00126722	27.3639	9.86703	0.45204	4.57741	0.0297285	27.9239	20.4126
chr10	81006990	81007707	1.1957	4.18316	0.00355685	27.4934	12.0029	0.45204	4.57741	0.0297285	27.9239	20.4126
chr11	121126434	121126719	1.63351	3.95345	0.000684983	27.2881	8.79503	0.45204	4.57741	0.0297285	27.9239	20.4126
chr15	12438748	12439984	1.47158	4.03841	0.00126722	27.3639	9.86703	0.45204	4.57741	0.0297285	27.9239	20.4126
chr17	47767613	47768115	1.47158	4.03841	0.00126722	27.3639	9.86703	0.45204	4.57741	0.0297285	27.9239	20.4126
chr3	82061349	82062161	1.32673	4.11441	0.00218883	27.4318	10.9362	0.45204	4.57741	0.0297285	27.9239	20.4126
chr5	125128816	125129609	1.07608	4.24593	0.00400634	27.5497	13.0673	0.45204	4.57741	0.0297285	27.9239	20.4126
chr7	122670595	122671231	1.1957	4.18316	0.00355685	27.4934	12.0029	0.45204	4.57741	0.0297285	27.9239	20.4126
chr7	143119877	143120246	1.07608	4.24593	0.00400634	27.5497	13.0673	0.45204	4.57741	0.0297285	27.9239	20.4126
chr8	91797568	91798228	1.81709	3.85712	0.000342491	27.2025	7.71987	0.45204	4.57741	0.0297285	27.9239	20.4126
chr9	21331397	21331883	1.1957	4.18316	0.00355685	27.4934	12.0029	0.45204	4.57741	0.0297285	27.9239	20.4126
chr9	110684060	110684852	1.14544	4.98289	0.000317963	47.0333	21.2615	0.45067	5.32193	0.0157008	46.762	34.2158
chr1	189727826	189728991	1.17764	5.76934	3.98597e-06	82.0343	36.2653	0.44912	6.09538	0.00695074	79.8896	58.5183
chr17	7218899	7219575	1.45689	4.90769	2.15761e-05	49.7332	18.1167	0.44886	5.40769	0.0138383	49.5949	36.3344
chr7	24237130	24237880	1.16638	5.06012	0.000189655	49.9811	22.2684	0.44886	5.40769	0.0138383	49.5949	36.3344
chr11	50565546	50566438	1.77749	4.0222	0.000192736	30.0843	8.77533	0.44775	4.71836	0.0301406	30.744	22.541
chr15	44748104	44748930	1.00812	4.42587	0.00490086	30.4831	15.156	0.44775	4.71836	0.0301406	30.744	22.541
chr2	37764872	37765690	1.00812	4.42587	0.00490086	30.4831	15.156	0.44775	4.71836	0.0301406	30.744	22.541
chr3	79160989	79162475	1.00812	4.42587	0.00490086	30.4831	15.156	0.44775	4.71836	0.0301406	30.744	22.541
chr11	76645653	76646442	1.03476	5.29154	0.000263471	56.0609	27.3631	0.44602	5.56529	0.014735	55.2651	40.5681
chr4	57294810	57295482	1.40331	5.17326	7.69065e-06	58.6846	22.1864	0.44492	5.63806	0.0130902	58.1022	42.6834
chr18	35867726	35868469	1.47111	4.31468	0.000408704	33.1339	11.9515	0.44441	4.84674	0.0262672	33.5664	24.6675
chr8	106561108	106561493	1.90892	4.08496	5.0692e-05	32.8865	8.75738	0.44441	4.84674	0.0262672	33.5664	24.6675
chr1	40469894	40470476	1.29111	5.30367	1.39521e-05	61.7864	25.2483	0.44398	5.70734	0.011635	60.9406	44.7977
chr12	24592939	24593809	1.34962	5.27296	8.01844e-06	61.7246	24.2205	0.44398	5.70734	0.011635	60.9406	44.7977
chr10	126505828	126506534	2.84942	2.62396	0.000163078	16.549	2.29621	0.44384	3.91645	0.048022	17.6105	12.9468
chr11	115091345	115091961	1.12712	3.52764	0.0161167	17.0441	7.80328	0.44384	3.91645	0.048022	17.6105	12.9468
chr15	85414689	85415114	3.80237	2.12396	6.48499e-05	16.2813	1.16698	0.44384	3.91645	0.048022	17.6105	12.9468
chr2	152587039	152587482	1.33905	3.41645	0.0103147	16.9824	6.71283	0.44384	3.91645	0.048022	17.6105	12.9468
chr3	82333519	82333951	1.5897	3.28493	0.00601691	16.9097	5.61808	0.44384	3.91645	0.048022	17.6105	12.9468
chr5	67530991	67531342	1.5897	3.28493	0.00601691	16.9097	5.61808	0.44384	3.91645	0.048022	17.6105	12.9468
chr6	39301437	39301840	1.89648	3.12396	0.00313926	16.8211	4.51812	0.44384	3.91645	0.048022	17.6105	12.9468
chr7	45481418	45481722	1.12712	3.52764	0.0161167	17.0441	7.80328	0.44384	3.91645	0.048022	17.6105	12.9468
chr8	41016211	41016853	2.29199	2.91645	0.000543594	16.7077	3.41161	0.44384	3.91645	0.048022	17.6105	12.9468
chr9	40873727	40874180	1.33905	3.41645	0.0103147	16.9824	6.71283	0.44384	3.91645	0.048022	17.6105	12.9468
chr9	57820280	57820688	1.12712	3.52764	0.0161167	17.0441	7.80328	0.44384	3.91645	0.048022	17.6105	12.9468
chr9	72969784	72970287	2.29199	2.91645	0.000543594	16.7077	3.41161	0.44384	3.91645	0.048022	17.6105	12.9468
chr10	76734917	76735542	1.19733	5.42118	2.32251e-05	64.8863	28.2956	0.44318	5.77345	0.0103466	63.7802	46.9111
chr2	102036994	102037598	1.26487	5.68752	1.72864e-06	79.8905	33.2455	0.44068	6.06496	0.00672969	77.9947	57.4655
chr16	46496674	46497722	1.70397	4.42587	3.52503e-05	38.7966	11.9083	0.43966	5.0736	0.0232951	39.2177	28.9155
chr8	95058287	95058913	1.27757	4.6496	0.000412854	39.0808	16.1204	0.43966	5.0736	0.0232951	39.2177	28.9155
chr11	94786104	94786871	1.0568	4.86989	0.000998168	42.1743	20.273	0.43797	5.17492	0.0204833	42.0462	31.0373
chr11	119856047	119857133	1.20971	4.78966	0.000401168	42.064	18.1866	0.43797	5.17492	0.0204833	42.0462	31.0373
chr10	58559045	58559443	1.00307	3.81468	0.0139908	19.9209	9.9393	0.43696	4.13339	0.0472638	20.4194	15.0837
chr11	43643033	43643570	1.00307	3.81468	0.0139908	19.9209	9.9393	0.43696	4.13339	0.0472638	20.4194	15.0837
chr11	106714963	106715441	1.00307	3.81468	0.0139908	19.9209	9.9393	0.43696	4.13339	0.0472638	20.4194	15.0837
chr13	45211472	45212262	1.34858	3.63339	0.0057893	19.8035	7.77641	0.43696	4.13339	0.0472638	20.4194	15.0837
chr13	113417923	113418486	1.5605	3.5222	0.00330817	19.7318	6.68972	0.43696	4.13339	0.0472638	20.4194	15.0837
chr14	33099131	33099667	1.5605	3.5222	0.00330817	19.7318	6.68972	0.43696	4.13339	0.0472638	20.4194	15.0837
chr2	29277554	29278222	1.00307	3.81468	0.0139908	19.9209	9.9393	0.43696	4.13339	0.0472638	20.4194	15.0837
chr4	54714567	54715356	2.51345	3.0222	0.000183582	19.4126	3.39986	0.43696	4.13339	0.0472638	20.4194	15.0837
chr5	88542781	88543223	1.165	3.72972	0.0093272	19.8658	8.85945	0.43696	4.13339	0.0472638	20.4194	15.0837
chr5	96988880	96989370	-1.14709	4.94285	0.000439537	20.6676	45.772	0.43696	4.13339	0.0472638	20.4194	15.0837
chr7	143100498	143101141	1.00307	3.81468	0.0139908	19.9209	9.9393	0.43696	4.13339	0.0472638	20.4194	15.0837
chr15	73870221	73870760	1.15429	4.91645	0.000384073	45.0542	20.2423	0.43662	5.26958	0.0180361	44.8765	33.1577
chr3	58982809	58983820	1.57413	4.69616	2.30693e-05	44.7317	15.0229	0.43662	5.26958	0.0180361	44.8765	33.1577
chr10	115396078	115396329	-1.31605	3.5	0.00716299	7.17	17.8522	0.43578	2.66096	0.0966797	7.35565	5.438
chr13	34983472	34983890	-1.55232	3.62396	0.00220545	7.19905	21.1139	0.43578	2.66096	0.0966797	7.35565	5.438
chr16	55691086	55691382	1.54277	2	0.0351562	6.82763	2.34342	0.43578	2.66096	0.0966797	7.35565	5.438
chr4	59302356	59302782	-1.13248	3.40368	0.0146125	7.14751	15.6698	0.43578	2.66096	0.0966797	7.35565	5.438
chr4	85404831	85405105	1.54277	2	0.0351562	6.82763	2.34342	0.43578	2.66096	0.0966797	7.35565	5.438
chr5	25296820	25297200	-1.13248	3.40368	0.0146125	7.14751	15.6698	0.43578	2.66096	0.0966797	7.35565	5.438
chr6	89622743	89622989	1.54277	2	0.0351562	6.82763	2.34342	0.43578	2.66096	0.0966797	7.35565	5.438
chr7	110728892	110729140	-1.31605	3.5	0.00716299	7.17	17.8522	0.43578	2.66096	0.0966797	7.35565	5.438
chr7	119845321	119845888	-1.47798	3.58496	0.00330817	7.1899	20.0281	0.43578	2.66096	0.0966797	7.35565	5.438
chrX	8233624	8234137	-1.31605	3.5	0.00716299	7.17	17.8522	0.43578	2.66096	0.0966797	7.35565	5.438
chrX	72274671	72275127	1.54277	2	0.0351562	6.82763	2.34342	0.43578	2.66096	0.0966797	7.35565	5.438
chr14	33184795	33185848	2.83058	4.12869	4.91553e-09	46.6558	6.55868	0.43552	5.35841	0.0159017	47.7083	35.2769
chr17	23630157	23630716	1.04432	5.06593	0.000561178	48.1041	23.3244	0.43552	5.35841	0.0159017	47.7083	35.2769
chr13	13359900	13360731	1.73887	4.86989	1.62055e-06	53.4207	16.005	0.43393	5.52117	0.016744	53.3766	39.5117
chr18	65934812	65935416	1.17019	5.24593	7.81894e-05	56.9263	25.2959	0.43336	5.59615	0.0148885	56.2129	41.6275
chr3	109378379	109379214	1.2287	5.21523	4.76764e-05	56.8693	24.2662	0.43336	5.59615	0.0148885	56.2129	41.6275
chr4	9027640	9028778	1.42085	5.11441	9.04802e-06	56.6826	21.1705	0.43336	5.59615	0.0148885	56.2129	41.6275
chr12	91766154	91767104	1.36352	5.21836	9.48235e-06	59.7189	23.2087	0.43292	5.66742	0.013244	59.0504	43.7423
chr2	35680904	35681496	1.08197	5.36608	0.000118119	60.0073	28.3465	0.43292	5.66742	0.013244	59.0504	43.7423
chr7	81854443	81855337	1.49455	5.1496	2.8199e-06	59.5851	21.1462	0.43292	5.66742	0.013244	59.0504	43.7423
chr3	137774937	137775911	1.10515	6.16993	7.51939e-07	105.603	49.0897	0.43282	6.45232	0.0038331	101.739	75.3695
chr1	54788901	54789766	1.54168	3.72561	0.00183674	22.5717	7.75306	0.43222	4.32193	0.0403508	23.2319	17.2177
chr1	177681146	177681656	1.54168	3.72561	0.00183674	22.5717	7.75306	0.43222	4.32193	0.0403508	23.2319	17.2177
chr16	64561513	64562048	2.00426	3.48289	0.000701733	22.3937	5.58192	0.43222	4.32193	0.0403508	23.2319	17.2177
chr5	106652849	106653798	-1.31715	5.22561	2.37059e-05	23.7036	59.0628	0.43222	4.32193	0.0403508	23.2319	17.2177
chr7	79788361	79788773	1.54168	3.72561	0.00183674	22.5717	7.75306	0.43222	4.32193	0.0403508	23.2319	17.2177
chr17	27588299	27588972	1.67535	5.5434	6.9904e-09	83.3479	26.0954	0.43193	6.13792	0.00716313	81.7916	60.6297
chr2	127335801	127336872	1.36356	6.34957	4.10793e-10	130.812	50.8363	0.42916	6.75736	0.00224519	125.534	93.2336
chr10	98975528	98976053	1.09148	4.13339	0.00492487	25.6188	12.0224	0.42887	4.48864	0.0346512	26.0475	19.3493
chr19	29430972	29431692	1.09148	4.13339	0.00492487	25.6188	12.0224	0.42887	4.48864	0.0346512	26.0475	19.3493
chr3	90155790	90156424	1.09148	4.13339	0.00492487	25.6188	12.0224	0.42887	4.48864	0.0346512	26.0475	19.3493
chr5	111178223	111179015	1.52929	3.90368	0.00152653	25.4276	8.80932	0.42887	4.48864	0.0346512	26.0475	19.3493
chr14	73433411	73433996	1.24523	4.20681	0.00254061	28.4317	11.9936	0.42646	4.63806	0.0298994	28.8659	21.4786
chr8	115159725	115160463	1.37627	4.13806	0.00152436	28.3681	10.9278	0.42646	4.63806	0.0298994	28.8659	21.4786
chr16	11456091	11456840	1.12647	5.99612	2.18991e-06	94.3106	43.1977	0.42478	6.29996	0.00601315	91.2875	68.0049
chr3	129213647	129214766	1.05322	4.44741	0.00363612	31.4289	15.1453	0.42472	4.77345	0.0302191	31.6868	23.6061
chr5	74260161	74261210	1.05322	4.44741	0.00363612	31.4289	15.1453	0.42472	4.77345	0.0302191	31.6868	23.6061
chr6	146946127	146946739	1.5158	4.2047	0.000486643	31.181	10.9041	0.42472	4.77345	0.0302191	31.6868	23.6061
chr10	74922825	74923339	1.39288	4.39721	0.000499785	34.1461	13.003	0.42347	4.89721	0.0264115	34.51	25.7317
chr7	114116680	114117967	1.5125	4.33444	0.000276477	34.0762	11.9438	0.42347	4.89721	0.0264115	34.51	25.7317
chr13	5592364	5593053	1.4006	4.51118	0.000287038	37.0521	14.0343	0.42257	5.01118	0.0266362	37.3353	27.8557
chr14	55520325	55521271	1.11514	4.66096	0.00130877	37.2336	17.1888	0.42257	5.01118	0.0266362	37.3353	27.8557
chr7	30743654	30744368	1.11514	4.66096	0.00130877	37.2336	17.1888	0.42257	5.01118	0.0266362	37.3353	27.8557
chr17	11845439	11846196	1.01948	4.92275	0.00111423	43.1858	21.3033	0.42152	5.21523	0.0206545	42.9917	32.0992
chr10	84516174	84517120	1.24233	6.08387	1.30843e-07	104.332	44.0998	0.41927	6.44561	0.00441781	100.792	75.3727
chr1	132401885	132402219	-1.27281	3.95943	0.00381633	10.0076	24.1816	0.4185	3.13339	0.0834618	10.1446	7.59023
chr12	27599249	27599483	2.02382	2.22972	0.0134277	9.4586	2.32592	0.4185	3.13339	0.0834618	10.1446	7.59023
chr12	104066319	104066597	1.46639	2.5222	0.0174561	9.54927	3.45576	0.4185	3.13339	0.0834618	10.1446	7.59023
chr13	6836791	6837074	1.46639	2.5222	0.0174561	9.54927	3.45576	0.4185	3.13339	0.0834618	10.1446	7.59023
chr14	67776987	67777413	-1.14178	3.89068	0.00751021	9.98518	22.0326	0.4185	3.13339	0.0834618	10.1446	7.59023
chr16	30940750	30941018	1.46639	2.5222	0.0174561	9.54927	3.45576	0.4185	3.13339	0.0834618	10.1446	7.59023
chr18	49500808	49501095	1.07088	2.72972	0.0458221	9.61413	4.5766	0.4185	3.13339	0.0834618	10.1446	7.59023
chr19	42425141	42425572	2.02382	2.22972	0.0134277	9.4586	2.32592	0.4185	3.13339	0.0834618	10.1446	7.59023
chr2	77138925	77139466	-1.20886	3.92587	0.00538776	9.99665	23.1077	0.4185	3.13339	0.0834618	10.1446	7.59023
chr3	129270110	129270365	1.46639	2.5222	0.0174561	9.54927	3.45576	0.4185	3.13339	0.0834618	10.1446	7.59023
chr4	11328709	11329095	1.46639	2.5222	0.0174561	9.54927	3.45576	0.4185	3.13339	0.0834618	10.1446	7.59023
chr5	29870609	29870922	2.02382	2.22972	0.0134277	9.4586	2.32592	0.4185	3.13339	0.0834618	10.1446	7.59023
chr6	99033192	99033415	1.07088	2.72972	0.0458221	9.61413	4.5766	0.4185	3.13339	0.0834618	10.1446	7.59023
chr7	115872773	115873412	-1.33393	3.9915	0.00267143	10.0181	25.2544	0.4185	3.13339	0.0834618	10.1446	7.59023
chr8	25328361	25328837	1.07088	2.72972	0.0458221	9.61413	4.5766	0.4185	3.13339	0.0834618	10.1446	7.59023
chr9	71806501	71806787	1.46639	2.5222	0.0174561	9.54927	3.45576	0.4185	3.13339	0.0834618	10.1446	7.59023
chr8	72353470	72354733	1.17509	5.98613	9.91222e-07	95.2519	42.1829	0.41755	6.31854	0.00610029	92.2396	69.0593
chr12	3855678	3856704	1.02897	5.57487	8.63221e-05	68.0895	33.3679	0.41176	5.85217	0.0107701	66.6276	50.0844
chr12	3959718	3960516	1.5441	5.30459	6.36448e-07	67.4918	23.1436	0.41176	5.85217	0.0107701	66.6276	50.0844
chr1	180395965	180396267	1.1284	3.06464	0.035408	12.3706	5.65859	0.41041	3.48864	0.0681916	12.9407	9.73671
chr11	46286800	46287248	1.1284	3.06464	0.035408	12.3706	5.65859	0.41041	3.48864	0.0681916	12.9407	9.73671
chr14	99228702	99229685	-1.24007	4.30735	0.00207915	12.8823	30.4293	0.41041	3.48864	0.0681916	12.9407	9.73671
chr15	12429642	12430187	1.43518	2.90368	0.0236053	12.3058	4.5507	0.41041	3.48864	0.0681916	12.9407	9.73671
chr16	32807436	32808104	1.43518	2.90368	0.0236053	12.3058	4.5507	0.41041	3.48864	0.0681916	12.9407	9.73671
chr2	18833050	18833499	-1.02814	4.19616	0.0073873	12.8357	26.177	0.41041	3.48864	0.0681916	12.9407	9.73671
chr2	35838697	35839153	-1.28831	4.33267	0.00147553	12.893	31.4901	0.41041	3.48864	0.0681916	12.9407	9.73671
chr3	51924487	51925236	-1.33492	4.35712	0.000723093	12.9032	32.55	0.41041	3.48864	0.0681916	12.9407	9.73671
chr6	8480199	8480348	-1.19007	4.28112	0.00290114	12.8713	29.3677	0.41041	3.48864	0.0681916	12.9407	9.73671
chr6	85237083	85237477	1.1284	3.06464	0.035408	12.3706	5.65859	0.41041	3.48864	0.0681916	12.9407	9.73671
chr6	116388035	116388388	-1.19007	4.28112	0.00290114	12.8713	29.3677	0.41041	3.48864	0.0681916	12.9407	9.73671
chr9	27176181	27176585	1.83068	2.69616	0.00694275	12.2228	3.43621	0.41041	3.48864	0.0681916	12.9407	9.73671
chr7	114066392	114067206	1.20332	5.2031	6.71002e-05	55.8994	24.2758	0.40889	5.58402	0.0170155	55.2717	41.6307
chr9	118943768	118944912	1.32838	5.13748	2.34426e-05	55.7799	22.2123	0.40889	5.58402	0.0170155	55.2717	41.6307
chr14	53634251	53634917	1.46148	4.98864	1.24677e-05	52.6872	19.1318	0.40816	5.5084	0.0190846	52.4359	39.5149
chr12	73593104	73594042	1.21596	4.94589	0.000196389	46.9766	20.2228	0.40669	5.34413	0.0183923	46.7686	35.2801
chr10	44434568	44435031	1.72847	3.04373	0.00739288	15.0112	4.52996	0.40627	3.77345	0.0566649	15.7424	11.8788
chr11	88118827	88119391	1.72847	3.04373	0.00739288	15.0112	4.52996	0.40627	3.77345	0.0566649	15.7424	11.8788
chr14	31618038	31618779	1.42169	3.2047	0.0129375	15.0902	5.6328	0.40627	3.77345	0.0566649	15.7424	11.8788
chr16	38113799	38114322	1.42169	3.2047	0.0129375	15.0902	5.6328	0.40627	3.77345	0.0566649	15.7424	11.8788
chr17	31815325	31815904	1.72847	3.04373	0.00739288	15.0112	4.52996	0.40627	3.77345	0.0566649	15.7424	11.8788
chr17	86803574	86803987	1.17103	3.33621	0.0203304	15.1551	6.73042	0.40627	3.77345	0.0566649	15.7424	11.8788
chr2	24862973	24863502	1.17103	3.33621	0.0203304	15.1551	6.73042	0.40627	3.77345	0.0566649	15.7424	11.8788
chr3	83764036	83764594	1.72847	3.04373	0.00739288	15.0112	4.52996	0.40627	3.77345	0.0566649	15.7424	11.8788
chr5	132397579	132398200	1.72847	3.04373	0.00739288	15.0112	4.52996	0.40627	3.77345	0.0566649	15.7424	11.8788
chr7	105477752	105478207	1.42169	3.2047	0.0129375	15.0902	5.6328	0.40627	3.77345	0.0566649	15.7424	11.8788
chr8	10414905	10415131	1.42169	3.2047	0.0129375	15.0902	5.6328	0.40627	3.77345	0.0566649	15.7424	11.8788
chr1	132139318	132140489	1.2754	4.82103	0.000200478	43.9785	18.168	0.40596	5.25439	0.0208109	43.9373	33.1609
chr15	100636537	100638125	1.19682	4.86226	0.000332371	44.0377	19.2108	0.40596	5.25439	0.0208109	43.9373	33.1609
chr16	17181306	17182025	1.64421	4.62751	1.75952e-05	43.7018	13.9811	0.40596	5.25439	0.0208109	43.9373	33.1609
chr8	81285960	81287184	1.44748	4.73074	6.48823e-05	43.8492	16.0778	0.40596	5.25439	0.0208109	43.9373	33.1609
chr14	52338511	52339141	1.17577	4.77345	0.000561635	41.1075	18.1962	0.40525	5.15871	0.0235698	41.1076	31.0405
chr4	149856338	149856776	1.09718	4.81468	0.000886792	41.1628	19.2406	0.40525	5.15871	0.0235698	41.1076	31.0405
chr5	21372419	21373376	1.09718	4.81468	0.000886792	41.1628	19.2406	0.40525	5.15871	0.0235698	41.1076	31.0405
chr5	90884688	90885304	1.17577	4.77345	0.000561635	41.1075	18.1962	0.40525	5.15871	0.0235698	41.1076	31.0405
chr8	95142137	95143198	1.44269	4.63339	0.00011278	40.9202	15.0537	0.40525	5.15871	0.0235698	41.1076	31.0405
chr1	165702449	165703014	1.54795	4.47126	0.000105751	37.929	12.9716	0.40458	5.05622	0.0267208	38.2797	28.9187
chr19	58942848	58943865	1.24117	4.63222	0.000585502	38.1287	16.1296	0.40458	5.05622	0.0267208	38.2797	28.9187
chr8	110721036	110722291	1.06909	4.72251	0.00147332	38.2411	18.2264	0.40458	5.05622	0.0267208	38.2797	28.9187
chr1	134719573	134720133	1.02102	3.66096	0.0174598	18.0194	8.87934	0.40411	4.01118	0.047661	18.5486	14.0172
chr11	59361239	59362379	1.41653	3.45345	0.00716299	17.8978	6.70474	0.40411	4.01118	0.047661	18.5486	14.0172
chr11	62486679	62487385	-1.35357	4.90689	8.18287e-05	18.7667	47.9572	0.40411	4.01118	0.047661	18.5486	14.0172
chr12	52818428	52819060	1.41653	3.45345	0.00716299	17.8978	6.70474	0.40411	4.01118	0.047661	18.5486	14.0172
chr13	91301725	91302229	-1.12112	4.78493	0.000886792	18.6922	40.6586	0.40411	4.01118	0.047661	18.5486	14.0172
chr15	50260019	50260456	1.41653	3.45345	0.00716299	17.8978	6.70474	0.40411	4.01118	0.047661	18.5486	14.0172
chr2	3102355	3102813	1.41653	3.45345	0.00716299	17.8978	6.70474	0.40411	4.01118	0.047661	18.5486	14.0172
chr2	10372362	10372724	1.66719	3.32193	0.00401127	17.8212	5.6113	0.40411	4.01118	0.047661	18.5486	14.0172
chr2	38084823	38085488	-1.08446	4.76569	0.00121195	18.6805	39.6135	0.40411	4.01118	0.047661	18.5486	14.0172
chr4	118516690	118517400	1.41653	3.45345	0.00716299	17.8978	6.70474	0.40411	4.01118	0.047661	18.5486	14.0172
chr4	122902197	122902476	2.36947	2.95345	0.000317097	17.6083	3.40749	0.40411	4.01118	0.047661	18.5486	14.0172
chr4	136719895	136720567	1.41653	3.45345	0.00716299	17.8978	6.70474	0.40411	4.01118	0.047661	18.5486	14.0172
chr5	30622150	30622964	1.2046	3.56464	0.0116399	17.9628	7.79387	0.40411	4.01118	0.047661	18.5486	14.0172
chr5	148820425	148820828	1.41653	3.45345	0.00716299	17.8978	6.70474	0.40411	4.01118	0.047661	18.5486	14.0172
chr7	120771182	120771985	-1.19164	4.82193	0.000464264	18.7148	42.7469	0.40411	4.01118	0.047661	18.5486	14.0172
chr8	46848990	46849300	1.2046	3.56464	0.0116399	17.9628	7.79387	0.40411	4.01118	0.047661	18.5486	14.0172
chr8	61517541	61518231	1.2046	3.56464	0.0116399	17.9628	7.79387	0.40411	4.01118	0.047661	18.5486	14.0172
chr19	37673341	37673854	1.03766	4.62396	0.00243645	35.3293	17.2095	0.40395	4.94589	0.0303243	35.4537	26.7955
chr7	44685486	44686607	1.9906	4.12396	2.0149e-05	34.7578	8.74625	0.40395	4.94589	0.0303243	35.4537	26.7955
chr8	25064690	25065076	1.12638	4.57741	0.00159306	35.2757	16.1584	0.40395	4.94589	0.0303243	35.4537	26.7955
chr17	8505719	8506421	1.00216	4.51809	0.00400542	32.4279	16.1898	0.40339	4.82642	0.030274	32.6298	24.6707
chr5	118458744	118459743	1.19889	4.41486	0.00170443	32.3189	14.0784	0.40339	4.82642	0.030274	32.6298	24.6707
chr7	98836749	98836997	1.00216	4.51809	0.00400542	32.4279	16.1898	0.40339	4.82642	0.030274	32.6298	24.6707
chr9	41950688	41951779	1.70444	4.1496	0.000167284	32.0405	9.83131	0.40339	4.82642	0.030274	32.6298	24.6707
chr9	73072491	73072984	1.42856	4.29436	0.000599433	32.1921	11.9594	0.40339	4.82642	0.030274	32.6298	24.6707
chr17	28523020	28523545	1.11176	5.61441	2.50682e-05	72.0183	33.3249	0.40312	5.93634	0.0111531	70.4192	53.2526
chr10	122005529	122005905	1.41572	3.66546	0.00399737	20.7253	7.76828	0.40306	4.21523	0.0468418	21.3588	16.1526
chr11	3510393	3510673	1.07022	3.84674	0.0103265	20.8482	9.92891	0.40306	4.21523	0.0468418	21.3588	16.1526
chr13	107838108	107838606	1.23215	3.76178	0.00666229	20.7905	8.85019	0.40306	4.21523	0.0468418	21.3588	16.1526
chr14	7882078	7882787	1.23215	3.76178	0.00666229	20.7905	8.85019	0.40306	4.21523	0.0468418	21.3588	16.1526
chr15	78325722	78326413	1.62765	3.55426	0.00220545	20.6503	6.68272	0.40306	4.21523	0.0468418	21.3588	16.1526
chr19	59208570	59208966	1.23215	3.76178	0.00666229	20.7905	8.85019	0.40306	4.21523	0.0468418	21.3588	16.1526
chr3	7612707	7613509	1.23215	3.76178	0.00666229	20.7905	8.85019	0.40306	4.21523	0.0468418	21.3588	16.1526
chr4	119127028	119127685	1.23215	3.76178	0.00666229	20.7905	8.85019	0.40306	4.21523	0.0468418	21.3588	16.1526
chr5	34148431	34149062	1.41572	3.66546	0.00399737	20.7253	7.76828	0.40306	4.21523	0.0468418	21.3588	16.1526
chr5	52476193	52476695	2.18509	3.26178	0.000316679	20.4542	4.49786	0.40306	4.21523	0.0468418	21.3588	16.1526
chr9	63151098	63151554	1.07022	3.84674	0.0103265	20.8482	9.92891	0.40306	4.21523	0.0468418	21.3588	16.1526
chr17	33566046	33566748	1.42422	4.16096	0.00105129	29.305	10.9196	0.40295	4.69616	0.0346059	29.8081	22.5442
chr19	30942313	30942959	1.42422	4.16096	0.00105129	29.305	10.9196	0.40295	4.69616	0.0346059	29.8081	22.5442
chr10	82795052	82795812	1.02487	4.22147	0.00547208	26.6102	13.0777	0.40268	4.55295	0.0346833	26.9889	20.4158
chr10	84604090	84604843	1.14449	4.15871	0.00355685	26.5557	12.0125	0.40268	4.55295	0.0346833	26.9889	20.4158
chr10	111680905	111681486	2.53524	3.42899	1.27614e-05	25.9311	4.47339	0.40268	4.55295	0.0346833	26.9889	20.4158
chr11	55197225	55198096	1.42037	4.01395	0.00184945	26.4306	9.8749	0.40268	4.55295	0.0346833	26.9889	20.4158
chr5	114199101	114200105	1.42037	4.01395	0.00184945	26.4306	9.8749	0.40268	4.55295	0.0346833	26.9889	20.4158
chr7	47409348	47410112	1.76588	3.83267	0.000528415	26.2748	7.72603	0.40268	4.55295	0.0346833	26.9889	20.4158
chr9	123997703	123998206	1.02487	4.22147	0.00547208	26.6102	13.0777	0.40268	4.55295	0.0346833	26.9889	20.4158
chr1	171848172	171848604	1.41735	3.85022	0.0022449	23.5702	8.8247	0.40267	4.39395	0.0402107	24.1723	18.2854
chr10	117678061	117678905	-1.10209	5.17215	0.000282534	24.6088	52.8267	0.40267	4.39395	0.0402107	24.1723	18.2854
chr11	88305706	88306210	1.41735	3.85022	0.0022449	23.5702	8.8247	0.40267	4.39395	0.0402107	24.1723	18.2854
chr11	97728297	97729493	1.41735	3.85022	0.0022449	23.5702	8.8247	0.40267	4.39395	0.0402107	24.1723	18.2854
chr13	81736614	81737163	-1.10209	5.17215	0.000282534	24.6088	52.8267	0.40267	4.39395	0.0402107	24.1723	18.2854
chr14	120369751	120370359	1.41735	3.85022	0.0022449	23.5702	8.8247	0.40267	4.39395	0.0402107	24.1723	18.2854
chr15	78596907	78597351	1.60093	3.7539	0.00183674	23.4963	7.74591	0.40267	4.39395	0.0402107	24.1723	18.2854
chr17	15743436	15743857	1.25542	3.93518	0.00381633	23.6356	9.90031	0.40267	4.39395	0.0402107	24.1723	18.2854
chr9	119795142	119795775	1.41735	3.85022	0.0022449	23.5702	8.8247	0.40267	4.39395	0.0402107	24.1723	18.2854
chr7	111155959	111157327	1.18777	5.31057	4.6655e-05	59.8988	26.2944	0.39847	5.6848	0.0153042	59.057	44.8042
chr16	33829418	33830554	1.5657	5.03841	2.53091e-06	56.5423	19.1008	0.39718	5.61441	0.0171391	56.2194	42.6899
chr7	96825634	96826612	1.00827	5.33089	0.000294672	57.0843	28.3791	0.39718	5.61441	0.0171391	56.2194	42.6899
chr1	106151763	106152521	1.48513	4.92118	1.45956e-05	50.6938	18.1087	0.39437	5.46241	0.0164372	50.5483	38.4582
chr10	125264912	125266809	1.43201	6.03991	3.31439e-09	108.077	40.0549	0.39437	6.51162	0.00543088	104.605	79.5854
chr17	58922677	58923199	1.52728	5.41645	2.14504e-07	72.5088	25.1556	0.3941	5.96018	0.0112724	71.369	54.3093
chr2	163228910	163229898	1.04432	5.06593	0.000561178	48.1041	23.3244	0.39285	5.37994	0.018552	47.7149	36.3408
chr6	115360739	115361975	1.57413	4.69616	2.30693e-05	44.7317	15.0229	0.39123	5.29248	0.0209537	44.883	34.2223
chr16	97535780	97536464	1.10294	5.77248	1.21277e-05	80.1123	37.2977	0.3887	6.0912	0.0105345	78.0078	59.5838
chr18	34202107	34203021	1.3262	5.26178	1.15615e-05	60.7528	24.2293	0.38777	5.71313	0.015429	60.0053	45.8626
chr6	71143751	71144502	1.15764	5.35022	5.42183e-05	60.9283	27.3108	0.38777	5.71313	0.015429	60.0053	45.8626
chr15	101191194	101191870	1.37242	4.59984	0.000240206	39.0174	15.0702	0.38768	5.09984	0.0267893	39.2243	29.9814
chr3	93443960	93445166	2.14178	4.19616	2.97914e-06	38.507	8.72568	0.38768	5.09984	0.0267893	39.2243	29.9814
chr6	134413834	134414765	1.4743	4.54638	0.000133448	38.9494	14.0182	0.38768	5.09984	0.0267893	39.2243	29.9814
chr2	166620098	166621060	1.44236	5.81468	2.59238e-08	92.7876	34.1425	0.38753	6.30367	0.00793038	90.3486	69.0659
chr11	8691775	8693073	1.12591	5.7047	1.26742e-05	77.0461	35.3036	0.38708	6.03841	0.0102139	75.1628	57.4752
chr8	84357519	84358282	1.44582	5.12633	6.16201e-06	57.6497	21.1623	0.38595	5.64414	0.0172553	57.1673	43.7488
chr18	54421822	54422564	-1.06525	5.76666	2.55321e-05	37.636	78.7545	0.38571	4.99292	0.0303243	36.3977	27.8589
chr1	172512969	172513321	1.17749	5.19077	9.39402e-05	54.9299	24.2855	0.384	5.57169	0.0192959	54.3306	41.634
chr11	6508226	6508897	1.04471	4.53841	0.00297372	33.3766	16.179	0.38357	4.87744	0.0303083	33.573	25.7349
chr14	57619486	57619925	1.24145	4.43518	0.00121376	33.2644	14.0691	0.38357	4.87744	0.0303083	33.573	25.7349
chr16	11565182	11565985	1.13956	4.48864	0.00194202	33.3224	15.125	0.38357	4.87744	0.0303083	33.573	25.7349
chr17	27989806	27990294	1.04471	4.53841	0.00297372	33.3766	16.179	0.38357	4.87744	0.0303083	33.573	25.7349
chr3	90604343	90604813	1.13956	4.48864	0.00194202	33.3224	15.125	0.38357	4.87744	0.0303083	33.573	25.7349
chr5	117505201	117505787	1.04471	4.53841	0.00297372	33.3766	16.179	0.38357	4.87744	0.0303083	33.573	25.7349
chr5	134269621	134270367	2.30443	3.87744	8.47811e-06	32.6647	6.61265	0.38357	4.87744	0.0303083	33.573	25.7349
chr6	31079550	31080050	1.15838	5.1204	0.000157467	51.9692	23.283	0.38192	5.49541	0.0215738	51.4953	39.5182
chr2	11547686	11547966	1.11001	4.37242	0.00326724	30.43	14.0979	0.38126	4.75191	0.0345361	30.7506	23.6093
chr4	133091300	133091795	1.22005	4.31468	0.00207915	30.3727	13.038	0.38126	4.75191	0.0345361	30.7506	23.6093
chr16	89675041	89676114	1.15976	5.7608	5.53983e-06	81.0466	36.2754	0.38084	6.1126	0.010635	78.9584	60.6395
chr1	89930071	89931589	1.41777	5.30551	2.6059e-06	64.642	24.1948	0.37964	5.80551	0.0139186	63.7933	49.0334
chr14	7818719	7819102	1.1957	4.18316	0.00355685	27.4934	12.0029	0.37872	4.61441	0.0346833	27.9305	21.4819
chr17	24289254	24289761	1.63351	3.95345	0.000684983	27.2881	8.79503	0.37872	4.61441	0.0346833	27.9305	21.4819
chr19	27218517	27219278	1.32673	4.11441	0.00218883	27.4318	10.9362	0.37872	4.61441	0.0346833	27.9305	21.4819
chr2	3769266	3769622	1.32673	4.11441	0.00218883	27.4318	10.9362	0.37872	4.61441	0.0346833	27.9305	21.4819
chr2	6159748	6160187	1.32673	4.11441	0.00218883	27.4318	10.9362	0.37872	4.61441	0.0346833	27.9305	21.4819
chr6	59184971	59185621	1.07608	4.24593	0.00400634	27.5497	13.0673	0.37872	4.61441	0.0346833	27.9305	21.4819
chr8	126917040	126917494	1.32673	4.11441	0.00218883	27.4318	10.9362	0.37872	4.61441	0.0346833	27.9305	21.4819
chr12	12941556	12942076	1.07918	5.41486	9.81256e-05	62.0109	29.3497	0.37748	5.7409	0.0155474	60.9537	46.9209
chr7	112225502	112226178	1.76519	5.05492	2.27715e-07	61.2871	18.0299	0.37748	5.7409	0.0155474	60.9537	46.9209
chr10	122544017	122544735	1.04784	5.00351	0.000679285	46.1237	22.3096	0.37727	5.32955	0.0210839	45.829	35.2834
chr16	26105037	26106629	1.51043	4.7608	2.96358e-05	45.76	16.0621	0.37727	5.32955	0.0210839	45.829	35.2834
chr18	39137125	39138318	1.21466	5.6198	5.78964e-06	74.9122	32.2778	0.37693	6.00666	0.0114991	73.2689	56.4223
chr1	138517001	138517716	1.03654	4.10716	0.00673929	24.6828	12.0327	0.37591	4.46241	0.0400414	25.113	19.3525
chr1	183075290	183075895	1.47436	3.87744	0.0022449	24.4985	8.81686	0.37591	4.46241	0.0400414	25.113	19.3525
chr10	21512517	21513176	-1.09901	5.22766	0.000234128	25.6016	54.8404	0.37591	4.46241	0.0400414	25.113	19.3525
chr15	27987761	27988445	1.47436	3.87744	0.0022449	24.4985	8.81686	0.37591	4.46241	0.0400414	25.113	19.3525
chr18	11622797	11623373	1.03654	4.10716	0.00673929	24.6828	12.0327	0.37591	4.46241	0.0400414	25.113	19.3525
chr2	172731431	172731818	1.31243	3.96241	0.00267143	24.5665	9.89152	0.37591	4.46241	0.0400414	25.113	19.3525
chr3	102203665	102204819	1.31243	3.96241	0.00267143	24.5665	9.89152	0.37591	4.46241	0.0400414	25.113	19.3525
chr9	50727816	50728371	1.31243	3.96241	0.00267143	24.5665	9.89152	0.37591	4.46241	0.0400414	25.113	19.3525
chr3	52180713	52181608	1.24291	4.80551	0.000284549	43.021	18.1772	0.37465	5.23888	0.0237839	42.9982	33.1642
chr4	136160132	136160633	1.01948	4.92275	0.00111423	43.1858	21.3033	0.37465	5.23888	0.0237839	42.9982	33.1642
chr8	10633294	10633882	1.16433	4.84674	0.000464264	43.0789	19.2205	0.37465	5.23888	0.0237839	42.9982	33.1642
chr1	134674339	134674789	2.24938	3.29248	0.0001885	21.3649	4.49335	0.37278	4.29248	0.0464034	22.2984	17.2209
chr17	28391598	28392369	1.13451	3.87744	0.00751021	21.7765	9.91897	0.37278	4.29248	0.0464034	22.2984	17.2209
chr18	4737930	4738590	1.13451	3.87744	0.00751021	21.7765	9.91897	0.37278	4.29248	0.0464034	22.2984	17.2209
chr4	102494262	102494681	1.48001	3.69616	0.00272548	21.6481	7.76051	0.37278	4.29248	0.0464034	22.2984	17.2209
chr6	128285711	128286358	1.69194	3.58496	0.00145359	21.5697	6.67604	0.37278	4.29248	0.0464034	22.2984	17.2209
chr7	143151187	143151499	1.69194	3.58496	0.00145359	21.5697	6.67604	0.37278	4.29248	0.0464034	22.2984	17.2209
chr9	121918935	121919576	1.29644	3.79248	0.00469388	21.7162	8.84133	0.37278	4.29248	0.0464034	22.2984	17.2209
chr2	59438009	59439124	1.20332	5.2031	6.71002e-05	55.8994	24.2758	0.3727	5.60229	0.0193897	55.2782	42.6932
chr3	90387456	90388468	2.00304	5.08496	4.12759e-09	67.9538	16.9527	0.37256	5.89232	0.0125793	67.5834	52.2022
chr11	51643268	51644679	1.06246	4.79809	0.00121195	40.2056	19.2511	0.37178	5.14212	0.0268434	40.1691	31.0438
chr14	76693898	76694535	1.8554	5.09799	3.8629e-08	65.1501	18.0046	0.37016	5.83156	0.0140364	64.7422	50.091
chr10	111440963	111441485	1.49023	3.48864	0.00490099	18.8143	6.69704	0.36922	4.09984	0.0540158	19.4871	15.0869
chr10	117332026	117332362	2.44317	2.98864	0.000183582	18.5099	3.40358	0.36922	4.09984	0.0540158	19.4871	15.0869
chr11	70005568	70005870	1.2783	3.59984	0.00827042	18.8826	7.78493	0.36922	4.09984	0.0540158	19.4871	15.0869
chr12	82066678	82067184	1.49023	3.48864	0.00490099	18.8143	6.69704	0.36922	4.09984	0.0540158	19.4871	15.0869
chr12	82072747	82073431	1.09472	3.69616	0.0128651	18.9421	8.86915	0.36922	4.09984	0.0540158	19.4871	15.0869
chr12	86030671	86031309	-1.15189	4.87493	0.000531794	19.6846	43.7399	0.36922	4.09984	0.0540158	19.4871	15.0869
chr13	6689077	6689358	1.49023	3.48864	0.00490099	18.8143	6.69704	0.36922	4.09984	0.0540158	19.4871	15.0869
chr15	75731647	75731960	1.2783	3.59984	0.00827042	18.8826	7.78493	0.36922	4.09984	0.0540158	19.4871	15.0869
chr18	6055561	6055995	3.00061	2.69616	9.05991e-05	18.3342	2.2908	0.36922	4.09984	0.0540158	19.4871	15.0869
chr4	148646672	148647033	1.09472	3.69616	0.0128651	18.9421	8.86915	0.36922	4.09984	0.0540158	19.4871	15.0869
chr9	122347942	122348207	-1.01076	4.80089	0.00181792	19.6371	39.568	0.36922	4.09984	0.0540158	19.4871	15.0869
chr10	93310882	93311537	1.90615	4.24593	1.83962e-05	36.733	9.80047	0.36862	5.03841	0.0303102	37.3418	28.922
chr9	32672027	32673318	1.04131	5.12574	0.000464002	50.0882	24.3371	0.36715	5.44892	0.0188382	49.608	38.4616
chr1	61200803	61201647	1.04545	3.48864	0.0219187	16.1265	7.81322	0.36512	3.87744	0.0557675	16.6795	12.95
chr11	11573760	11574006	1.50803	3.24593	0.00889456	15.9993	5.62523	0.36512	3.87744	0.0557675	16.6795	12.95
chr11	70720526	70720983	1.04545	3.48864	0.0219187	16.1265	7.81322	0.36512	3.87744	0.0557675	16.6795	12.95
chr11	115381723	115382448	1.50803	3.24593	0.00889456	15.9993	5.62523	0.36512	3.87744	0.0557675	16.6795	12.95
chr13	53426523	53426857	1.50803	3.24593	0.00889456	15.9993	5.62523	0.36512	3.87744	0.0557675	16.6795	12.95
chr13	85505980	85506439	-1.41787	4.78112	8.01911e-05	16.8209	44.944	0.36512	3.87744	0.0557675	16.6795	12.95
chr14	62940440	62941071	1.81481	3.08496	0.00485158	15.9156	4.52387	0.36512	3.87744	0.0557675	16.6795	12.95
chr15	91049231	91050060	1.25737	3.37744	0.0146125	16.0681	6.72138	0.36512	3.87744	0.0557675	16.6795	12.95
chr17	48602587	48602992	1.25737	3.37744	0.0146125	16.0681	6.72138	0.36512	3.87744	0.0557675	16.6795	12.95
chr18	69222282	69222880	-1.04402	4.58496	0.00327984	16.7136	34.4629	0.36512	3.87744	0.0557675	16.6795	12.95
chr19	10907516	10908421	1.0861	4.55817	0.00218656	34.3258	16.1686	0.36512	4.92665	0.0303243	34.5165	26.7988
chr2	147307626	147308148	1.04545	3.48864	0.0219187	16.1265	7.81322	0.36512	3.87744	0.0557675	16.6795	12.95
chr3	109311411	109311814	1.25737	3.37744	0.0146125	16.0681	6.72138	0.36512	3.87744	0.0557675	16.6795	12.95
chr5	52516070	52516582	1.04545	3.48864	0.0219187	16.1265	7.81322	0.36512	3.87744	0.0557675	16.6795	12.95
chr5	115210446	115210889	1.25737	3.37744	0.0146125	16.0681	6.72138	0.36512	3.87744	0.0557675	16.6795	12.95
chr6	22027560	22028325	-1.16722	4.6496	0.000947135	16.7489	37.6144	0.36512	3.87744	0.0557675	16.6795	12.95
chr7	104169657	104170217	1.95031	4.10473	3.20553e-05	33.8218	8.75174	0.36512	4.92665	0.0303243	34.5165	26.7988
chr8	124403837	124404304	1.25737	3.37744	0.0146125	16.0681	6.72138	0.36512	3.87744	0.0557675	16.6795	12.95
chr9	118990951	118991687	1.25737	3.37744	0.0146125	16.0681	6.72138	0.36512	3.87744	0.0557675	16.6795	12.95
chr13	105293779	105294819	1.14544	4.98289	0.000317963	47.0333	21.2615	0.36402	5.36566	0.0212023	46.7751	36.3442
chr15	3582945	3583736	1.07836	5.01809	0.000498624	47.0873	22.299	0.36402	5.36566	0.0212023	46.7751	36.3442
chr10	77864073	77865063	1.11407	5.27537	0.000124802	56.981	26.3246	0.36188	5.63222	0.0194763	56.2258	43.7521
chr11	119134467	119135154	1.17019	5.24593	7.81894e-05	56.9263	25.2959	0.36188	5.63222	0.0194763	56.2258	43.7521
chr7	58676984	58677966	1.42085	5.11441	9.04802e-06	56.6826	21.1705	0.36188	5.63222	0.0194763	56.2258	43.7521
chr18	3270207	3271168	1.04741	6.08371	3.70057e-06	97.5056	47.1768	0.3616	6.37619	0.00826805	94.1567	73.2821
chr12	112129956	112130902	1.82258	4.04373	0.000124346	31.0178	8.76917	0.36119	4.80551	0.0344498	31.6933	24.674
chr13	96971777	96972628	1.1551	4.39395	0.00237138	31.3741	14.088	0.36119	4.80551	0.0344498	31.6933	24.674
chr13	103096298	103097135	1.5158	4.2047	0.000486643	31.181	10.9041	0.36119	4.80551	0.0344498	31.6933	24.674
chr15	96768505	96769042	1.66065	4.12869	0.000254908	31.1038	9.83801	0.36119	4.80551	0.0344498	31.6933	24.674
chr6	15720450	15721670	1.05322	4.44741	0.00363612	31.4289	15.1453	0.36119	4.80551	0.0344498	31.6933	24.674
chr9	122232263	122232784	1.05322	4.44741	0.00363612	31.4289	15.1453	0.36119	4.80551	0.0344498	31.6933	24.674
chr13	55463924	55464963	1.05197	4.93826	0.000823014	44.147	21.2925	0.36058	5.27729	0.0238714	43.9437	34.2256
chr1	190958708	190959326	-1.40278	4.49718	0.000287038	13.8882	36.7218	0.36026	3.61441	0.0664204	13.8762	10.8099
chr11	68176537	68176951	1.9349	2.74593	0.00427246	13.1171	3.43063	0.36026	3.61441	0.0664204	13.8762	10.8099
chr13	37580876	37581263	1.23262	3.11441	0.0258751	13.2757	5.64941	0.36026	3.61441	0.0664204	13.8762	10.8099
chr13	44300347	44301006	1.9349	2.74593	0.00427246	13.1171	3.43063	0.36026	3.61441	0.0664204	13.8762	10.8099
chr17	87063989	87064509	1.23262	3.11441	0.0258751	13.2757	5.64941	0.36026	3.61441	0.0664204	13.8762	10.8099
chr17	90809221	90809515	1.23262	3.11441	0.0258751	13.2757	5.64941	0.36026	3.61441	0.0664204	13.8762	10.8099
chr2	163951729	163952121	2.49234	2.45345	0.00160217	12.9926	2.30901	0.36026	3.61441	0.0664204	13.8762	10.8099
chr4	95075561	95076148	1.23262	3.11441	0.0258751	13.2757	5.64941	0.36026	3.61441	0.0664204	13.8762	10.8099
chr5	29826744	29827134	1.9349	2.74593	0.00427246	13.1171	3.43063	0.36026	3.61441	0.0664204	13.8762	10.8099
chr5	72580230	72581179	2.49234	2.45345	0.00160217	12.9926	2.30901	0.36026	3.61441	0.0664204	13.8762	10.8099
chr8	10483857	10484255	1.23262	3.11441	0.0258751	13.2757	5.64941	0.36026	3.61441	0.0664204	13.8762	10.8099
chr8	88666455	88666939	1.9349	2.74593	0.00427246	13.1171	3.43063	0.36026	3.61441	0.0664204	13.8762	10.8099
chr9	24473857	24474252	-1.13585	4.35712	0.00326724	13.8249	30.38	0.36026	3.61441	0.0664204	13.8762	10.8099
chr9	72797128	72797604	1.9349	2.74593	0.00427246	13.1171	3.43063	0.36026	3.61441	0.0664204	13.8762	10.8099
chr4	8199879	8200830	1.03011	5.48649	0.000124963	64.0685	31.3727	0.35807	5.79483	0.0157662	62.8509	49.0367
chr1	132341614	132342631	2.21206	4.22972	1.82472e-06	40.3849	8.71613	0.3568	5.18316	0.0268843	41.114	32.1058
chr2	127328252	127328904	1.44269	4.63339	0.00011278	40.9202	15.0537	0.3568	5.18316	0.0268843	41.114	32.1058
chr7	25213140	25213496	1.25911	4.72972	0.000342692	41.0489	17.1503	0.3568	5.18316	0.0268843	41.114	32.1058
chr7	49462065	49463502	1.02285	4.85368	0.00135236	41.2152	20.2838	0.3568	5.18316	0.0268843	41.114	32.1058
chr13	3477960	3478709	1.01557	4.32732	0.00445533	28.5437	14.1187	0.35672	4.67326	0.0391765	28.8724	22.5475
chr2	25741634	25742504	1.12561	4.26958	0.00400634	28.49	13.0572	0.35672	4.67326	0.0391765	28.8724	22.5475
chr11	72998553	72999268	1.85394	4.72766	1.29713e-06	50.3749	13.9355	0.35521	5.48217	0.0215738	50.5547	39.5215
chr1	128628277	128628674	1.20232	2.79248	0.0333252	10.5096	4.56724	0.35432	3.29248	0.0800896	11.0781	8.66572
chr16	16501506	16501959	2.15526	2.29248	0.00805664	10.3396	2.32117	0.35432	3.29248	0.0800896	11.0781	8.66572
chr19	24541644	24541911	-1.37104	4.1427	0.00152436	10.9828	28.4079	0.35432	3.29248	0.0800896	11.0781	8.66572
chr19	42655108	42655381	1.59783	2.58496	0.0174561	10.4387	3.44869	0.35432	3.29248	0.0800896	11.0781	8.66572
chr19	58469467	58469758	1.20232	2.79248	0.0333252	10.5096	4.56724	0.35432	3.29248	0.0800896	11.0781	8.66572
chr2	25639923	25640200	1.20232	2.79248	0.0333252	10.5096	4.56724	0.35432	3.29248	0.0800896	11.0781	8.66572
chr2	71965493	71965894	1.20232	2.79248	0.0333252	10.5096	4.56724	0.35432	3.29248	0.0800896	11.0781	8.66572
chr2	84366723	84367099	-1.31712	4.11441	0.00218883	10.9727	27.3406	0.35432	3.29248	0.0800896	11.0781	8.66572
chr2	118199898	118200200	1.20232	2.79248	0.0333252	10.5096	4.56724	0.35432	3.29248	0.0800896	11.0781	8.66572
chr2	181375688	181376105	-1.14138	4.0222	0.00607144	10.9398	24.1322	0.35432	3.29248	0.0800896	11.0781	8.66572
chr3	69332332	69332821	-1.07742	3.98864	0.00832654	10.9278	23.0605	0.35432	3.29248	0.0800896	11.0781	8.66572
chr4	53203495	53203959	1.20232	2.79248	0.0333252	10.5096	4.56724	0.35432	3.29248	0.0800896	11.0781	8.66572
chr4	120120303	120120622	1.20232	2.79248	0.0333252	10.5096	4.56724	0.35432	3.29248	0.0800896	11.0781	8.66572
chr4	134013203	134013507	1.20232	2.79248	0.0333252	10.5096	4.56724	0.35432	3.29248	0.0800896	11.0781	8.66572
chr6	8479683	8480087	-1.56778	4.24593	0.000217976	11.0199	32.6682	0.35432	3.29248	0.0800896	11.0781	8.66572
chr6	85358150	85358487	-1.07742	3.98864	0.00832654	10.9278	23.0605	0.35432	3.29248	0.0800896	11.0781	8.66572
chr7	68579711	68579955	1.59783	2.58496	0.0174561	10.4387	3.44869	0.35432	3.29248	0.0800896	11.0781	8.66572
chr7	122015142	122015411	-1.42293	4.16993	0.00105129	10.9926	29.4744	0.35432	3.29248	0.0800896	11.0781	8.66572
chr9	96167152	96167627	-1.01034	3.95345	0.0112653	10.9153	21.9876	0.35432	3.29248	0.0800896	11.0781	8.66572
chr13	47244628	47245367	1.24117	4.63222	0.000585502	38.1287	16.1296	0.35259	5.08245	0.0302836	38.2861	29.9847
chr19	43851903	43852571	2.10538	4.17878	4.8411e-06	37.5689	8.73063	0.35259	5.08245	0.0302836	38.2861	29.9847
chr4	63024747	63025776	1.4379	4.529	0.000196395	38.0005	14.0261	0.35259	5.08245	0.0302836	38.2861	29.9847
chr11	116281152	116281814	1.36736	3.98864	0.00267143	25.4982	9.88306	0.35158	4.52764	0.0398489	26.054	20.4191
chr8	120306933	120307797	1.52929	3.90368	0.00152653	25.4276	8.80932	0.35158	4.52764	0.0398489	26.054	20.4191
chr9	55544905	55545148	1.22251	4.06464	0.00311044	25.5615	10.954	0.35158	4.52764	0.0398489	26.054	20.4191
chr12	70201778	70202556	1.03323	5.34281	0.000218464	58.0583	28.3681	0.3515	5.66153	0.019556	57.1737	44.8109
chr1	60960303	60960935	1.03766	4.62396	0.00243645	35.3293	17.2095	0.34788	4.97418	0.0341149	35.4601	27.8623
chr1	91151087	91152042	1.22124	4.52764	0.000999569	35.2184	15.1057	0.34788	4.97418	0.0341149	35.4601	27.8623
chr11	32752360	32753024	1.12638	4.57741	0.00159306	35.2757	16.1584	0.34788	4.97418	0.0341149	35.4601	27.8623
chr13	6633535	6634305	1.22124	4.52764	0.000999569	35.2184	15.1057	0.34788	4.97418	0.0341149	35.4601	27.8623
chr13	29458181	29458848	1.03766	4.62396	0.00243645	35.3293	17.2095	0.34788	4.97418	0.0341149	35.4601	27.8623
chr2	26496177	26497130	1.12638	4.57741	0.00159306	35.2757	16.1584	0.34788	4.97418	0.0341149	35.4601	27.8623
chr9	32709790	32710767	1.17749	5.19077	9.39402e-05	54.9299	24.2855	0.34781	5.58995	0.021764	54.337	42.6965
chr9	98489360	98490047	1.23861	5.15871	5.70776e-05	54.8724	23.2539	0.34781	5.58995	0.021764	54.337	42.6965
chr1	167545799	167546538	1.0167	4.98864	0.000919032	45.1604	22.3204	0.34725	5.31468	0.0239471	44.8894	35.2867
chr10	115171108	115172137	1.0167	4.98864	0.000919032	45.1604	22.3204	0.34725	5.31468	0.0239471	44.8894	35.2867
chr15	64032647	64033786	1.57413	4.69616	2.30693e-05	44.7317	15.0229	0.34725	5.31468	0.0239471	44.8894	35.2867
chr10	94225357	94225697	1.16326	2.37744	0.0402832	7.77624	3.47212	0.34666	2.87744	0.0981903	8.28657	6.51657
chr11	49631227	49631484	1.16326	2.37744	0.0402832	7.77624	3.47212	0.34666	2.87744	0.0981903	8.28657	6.51657
chr11	53958215	53958522	1.16326	2.37744	0.0402832	7.77624	3.47212	0.34666	2.87744	0.0981903	8.28657	6.51657
chr11	75264630	75264895	-1.13813	3.58496	0.0116399	8.08863	17.8028	0.34666	2.87744	0.0981903	8.28657	6.51657
chr15	62134089	62134642	-1.37439	3.70893	0.00399737	8.12141	21.0555	0.34666	2.87744	0.0981903	8.28657	6.51657
chr16	13866017	13866321	-1.04941	3.53841	0.0161167	8.07636	16.7155	0.34666	2.87744	0.0981903	8.28657	6.51657
chr18	20837342	20837868	-1.04941	3.53841	0.0161167	8.07636	16.7155	0.34666	2.87744	0.0981903	8.28657	6.51657
chr2	13938221	13938513	1.16326	2.37744	0.0402832	7.77624	3.47212	0.34666	2.87744	0.0981903	8.28657	6.51657
chr4	88912957	88913228	-1.37439	3.70893	0.00399737	8.12141	21.0555	0.34666	2.87744	0.0981903	8.28657	6.51657
chr5	66524223	66524799	1.72069	2.08496	0.0219727	7.7024	2.33693	0.34666	2.87744	0.0981903	8.28657	6.51657
chr6	32894098	32894525	-1.57594	3.81468	0.00122449	8.14947	24.2961	0.34666	2.87744	0.0981903	8.28657	6.51657
chr6	38469671	38470048	-1.30006	3.66993	0.0057893	8.11108	19.9727	0.34666	2.87744	0.0981903	8.28657	6.51657
chr9	58841737	58841974	1.16326	2.37744	0.0402832	7.77624	3.47212	0.34666	2.87744	0.0981903	8.28657	6.51657
chr9	95526034	95526311	-1.22148	3.62869	0.00827042	8.10018	18.8885	0.34666	2.87744	0.0981903	8.28657	6.51657
chr10	41385507	41386355	1.54168	3.72561	0.00183674	22.5717	7.75306	0.34556	4.36566	0.0459551	23.2384	18.2887
chr17	31121943	31122406	1.3581	3.82193	0.00326531	22.6428	8.83284	0.34556	4.36566	0.0459551	23.2384	18.2887
chr17	83214655	83216035	1.19617	3.90689	0.00538776	22.7056	9.90945	0.34556	4.36566	0.0459551	23.2384	18.2887
chr17	87601543	87602880	1.3581	3.82193	0.00326531	22.6428	8.83284	0.34556	4.36566	0.0459551	23.2384	18.2887
chr19	31812990	31813601	1.3581	3.82193	0.00326531	22.6428	8.83284	0.34556	4.36566	0.0459551	23.2384	18.2887
chr2	58035625	58036214	2.31104	3.32193	0.000111386	22.2765	4.48904	0.34556	4.36566	0.0459551	23.2384	18.2887
chr4	149045849	149046396	1.3581	3.82193	0.00326531	22.6428	8.83284	0.34556	4.36566	0.0459551	23.2384	18.2887
chr5	107403273	107403948	1.05132	3.98289	0.00832654	22.762	10.9832	0.34556	4.36566	0.0459551	23.2384	18.2887
chr6	52190964	52191602	1.3581	3.82193	0.00326531	22.6428	8.83284	0.34556	4.36566	0.0459551	23.2384	18.2887
chr6	143035184	143035819	1.05132	3.98289	0.00832654	22.762	10.9832	0.34556	4.36566	0.0459551	23.2384	18.2887
chr10	86498096	86499267	1.33556	5.43518	3.3587e-06	68.7346	27.2352	0.34368	5.90689	0.0143594	67.5897	53.2626
chr11	5369068	5369812	1.68857	4.53841	2.01392e-05	41.7207	12.9432	0.34265	5.22302	0.0269134	42.0592	33.1676
chr12	16653429	16654064	1.09701	4.46832	0.00267028	32.3753	15.135	0.34256	4.85712	0.0343494	32.6362	25.7383
chr16	30009528	30009936	1.55959	4.22561	0.000326964	32.12	10.8966	0.34256	4.85712	0.0343494	32.6362	25.7383
chr9	102840558	102841443	1.19889	4.41486	0.00170443	32.3189	14.0784	0.34256	4.85712	0.0343494	32.6362	25.7383
chr10	18870982	18871643	1.20468	5.01118	0.00016324	48.9598	21.2419	0.33942	5.43518	0.021407	48.6677	38.465
chr13	20090101	20091704	1.41724	5.47418	7.56262e-07	72.6455	27.2006	0.33911	5.98792	0.0146413	71.3816	56.4291
chr1	152520862	152521207	1.00307	3.81468	0.0139908	19.9209	9.9393	0.33834	4.18316	0.0531718	20.4259	16.1559
chr14	25726276	25726737	1.165	3.72972	0.0093272	19.8658	8.85945	0.33834	4.18316	0.0531718	20.4259	16.1559
chr14	79106796	79107410	1.165	3.72972	0.0093272	19.8658	8.85945	0.33834	4.18316	0.0531718	20.4259	16.1559
chr17	17587357	17587630	1.00307	3.81468	0.0139908	19.9209	9.9393	0.33834	4.18316	0.0531718	20.4259	16.1559
chr17	28141169	28141663	1.165	3.72972	0.0093272	19.8658	8.85945	0.33834	4.18316	0.0531718	20.4259	16.1559
chr18	35863203	35863470	1.165	3.72972	0.0093272	19.8658	8.85945	0.33834	4.18316	0.0531718	20.4259	16.1559
chr18	43650202	43650668	1.5605	3.5222	0.00330817	19.7318	6.68972	0.33834	4.18316	0.0531718	20.4259	16.1559
chr4	57011151	57011887	1.165	3.72972	0.0093272	19.8658	8.85945	0.33834	4.18316	0.0531718	20.4259	16.1559
chr5	38235308	38235788	1.165	3.72972	0.0093272	19.8658	8.85945	0.33834	4.18316	0.0531718	20.4259	16.1559
chr5	139075183	139075698	1.165	3.72972	0.0093272	19.8658	8.85945	0.33834	4.18316	0.0531718	20.4259	16.1559
chr6	85132869	85133110	1.165	3.72972	0.0093272	19.8658	8.85945	0.33834	4.18316	0.0531718	20.4259	16.1559
chr7	98770370	98770826	2.11794	3.22972	0.000791699	19.5444	4.50256	0.33834	4.18316	0.0531718	20.4259	16.1559
chr7	117585132	117585485	1.00307	3.81468	0.0139908	19.9209	9.9393	0.33834	4.18316	0.0531718	20.4259	16.1559
chr9	41109358	41109897	1.34858	3.63339	0.0057893	19.8035	7.77641	0.33834	4.18316	0.0531718	20.4259	16.1559
chr9	103426394	103426801	2.11794	3.22972	0.000791699	19.5444	4.50256	0.33834	4.18316	0.0531718	20.4259	16.1559
chr6	54718609	54719997	1.07071	6.61298	4.81037e-08	141.861	67.5379	0.33777	6.90904	0.00508638	135.104	106.903
chr14	120347489	120348295	1.58435	4.48864	7.05007e-05	38.8762	12.9642	0.33752	5.12515	0.030246	39.2306	31.0472
chr3	105191461	105192405	1.4743	4.54638	0.000133448	38.9494	14.0182	0.33752	5.12515	0.030246	39.2306	31.0472
chr6	48859933	48860852	1.4743	4.54638	0.000133448	38.9494	14.0182	0.33752	5.12515	0.030246	39.2306	31.0472
chr1	53773622	53774375	1.17357	4.29248	0.00290114	29.431	13.0475	0.33645	4.72972	0.0389316	29.8145	23.6127
chr10	26494310	26494958	1.42422	4.16096	0.00105129	29.305	10.9196	0.33645	4.72972	0.0389316	29.8145	23.6127
chr2	155978995	155979821	1.42422	4.16096	0.00105129	29.305	10.9196	0.33645	4.72972	0.0389316	29.8145	23.6127
chr5	53258014	53258956	1.42422	4.16096	0.00105129	29.305	10.9196	0.33645	4.72972	0.0389316	29.8145	23.6127
chr1	119630503	119630747	-1.10446	2.95345	0.0333252	5.28248	11.3583	0.33587	2.29248	0.102539	5.50375	4.36066
chr13	96008191	96008484	-1.10446	2.95345	0.0333252	5.28248	11.3583	0.33587	2.29248	0.102539	5.50375	4.36066
chr14	53091021	53091252	-1.10446	2.95345	0.0333252	5.28248	11.3583	0.33587	2.29248	0.102539	5.50375	4.36066
chr14	63092199	63092612	-1.35512	3.08496	0.0110893	5.30519	13.5716	0.33587	2.29248	0.102539	5.50375	4.36066
chr4	106606989	106607356	-1.35512	3.08496	0.0110893	5.30519	13.5716	0.33587	2.29248	0.102539	5.50375	4.36066
chr5	91530681	91531055	-1.10446	2.95345	0.0333252	5.28248	11.3583	0.33587	2.29248	0.102539	5.50375	4.36066
chr7	106854395	106854923	-1.35512	3.08496	0.0110893	5.30519	13.5716	0.33587	2.29248	0.102539	5.50375	4.36066
chr8	109808142	109808381	-1.23549	3.0222	0.0236053	5.29434	12.4661	0.33587	2.29248	0.102539	5.50375	4.36066
chr11	43528154	43529576	1.93683	4.53707	2.45389e-06	45.4272	11.8651	0.3346	5.35109	0.0240122	45.8353	36.3475
chr18	36017911	36019212	1.18544	4.93132	0.000275531	46.0152	20.2325	0.3346	5.35109	0.0240122	45.8353	36.3475
chr2	135439302	135440239	1.25977	4.89232	0.000166988	45.9567	19.192	0.3346	5.35109	0.0240122	45.8353	36.3475
chr7	19920340	19921308	1.46148	4.98864	1.24677e-05	52.6872	19.1318	0.33291	5.54638	0.0242214	52.4487	41.6407
chrX	103483143	103483654	1.00985	5.22561	0.000429235	53.096	26.3673	0.33291	5.54638	0.0242214	52.4487	41.6407
chr1	173941693	173942775	1.16562	4.59615	0.00115055	36.2261	16.1486	0.33176	5.02014	0.0339842	36.404	28.9254
chr5	21395180	21395820	1.07689	4.6427	0.0017935	36.2811	17.199	0.33176	5.02014	0.0339842	36.404	28.9254
chr10	95894140	95895232	1.24112	5.44209	1.17255e-05	66.8403	28.2764	0.33154	5.872	0.0160536	65.6975	52.209
chr17	5327580	5328179	1.24065	5.71836	2.05723e-06	80.9344	34.2499	0.33154	6.13748	0.0136287	78.971	62.7572
chr13	15591027	15591400	2.29199	2.91645	0.000543594	16.7077	3.41161	0.32943	3.97418	0.0548823	17.617	14.0205
chr13	54948935	54949574	1.5897	3.28493	0.00601691	16.9097	5.61808	0.32943	3.97418	0.0548823	17.617	14.0205
chr13	76409300	76409672	1.33905	3.41645	0.0103147	16.9824	6.71283	0.32943	3.97418	0.0548823	17.617	14.0205
chr13	101633254	101634100	-1.40016	4.85368	6.75059e-05	17.7975	46.9729	0.32943	3.97418	0.0548823	17.617	14.0205
chr15	58770270	58770749	1.33905	3.41645	0.0103147	16.9824	6.71283	0.32943	3.97418	0.0548823	17.617	14.0205
chr17	46621373	46621725	1.33905	3.41645	0.0103147	16.9824	6.71283	0.32943	3.97418	0.0548823	17.617	14.0205
chr6	143361385	143361717	1.5897	3.28493	0.00601691	16.9097	5.61808	0.32943	3.97418	0.0548823	17.617	14.0205
chr7	19889922	19890319	1.12712	3.52764	0.0161167	17.0441	7.80328	0.32943	3.97418	0.0548823	17.617	14.0205
chr7	101699485	101699914	-1.00465	4.64616	0.003587	17.6774	35.469	0.32943	3.97418	0.0548823	17.617	14.0205
chr9	33080029	33080711	1.33905	3.41645	0.0103147	16.9824	6.71283	0.32943	3.97418	0.0548823	17.617	14.0205
chr9	45499120	45500000	1.89648	3.12396	0.00313926	16.8211	4.51812	0.32943	3.97418	0.0548823	17.617	14.0205
chr9	103490433	103490773	1.12712	3.52764	0.0161167	17.0441	7.80328	0.32943	3.97418	0.0548823	17.617	14.0205
chr11	32565063	32565526	1.97781	3.72147	0.000248666	26.1797	6.64638	0.32936	4.58995	0.0396381	26.9952	21.4853
chr11	70737606	70738361	1.5823	3.92899	0.00102747	26.3575	8.80205	0.32936	4.58995	0.0396381	26.9952	21.4853
chr17	34388462	34388904	1.42037	4.01395	0.00184945	26.4306	9.8749	0.32936	4.58995	0.0396381	26.9952	21.4853
chr18	38881402	38882553	1.14449	4.15871	0.00355685	26.5557	12.0125	0.32936	4.58995	0.0396381	26.9952	21.4853
chr18	61056371	61057001	1.27552	4.08995	0.00311044	26.4962	10.945	0.32936	4.58995	0.0396381	26.9952	21.4853
chr2	180692551	180693079	1.27552	4.08995	0.00311044	26.4962	10.945	0.32936	4.58995	0.0396381	26.9952	21.4853
chr3	83080594	83081103	1.02487	4.22147	0.00547208	26.6102	13.0777	0.32936	4.58995	0.0396381	26.9952	21.4853
chr4	45819929	45820382	1.42037	4.01395	0.00184945	26.4306	9.8749	0.32936	4.58995	0.0396381	26.9952	21.4853
chr6	83482386	83483168	1.14449	4.15871	0.00355685	26.5557	12.0125	0.32936	4.58995	0.0396381	26.9952	21.4853
chr6	142908258	142909119	-1.16469	5.37031	6.25416e-05	27.6262	61.9339	0.32936	4.58995	0.0396381	26.9952	21.4853
chr15	83425249	83425647	-1.13706	6.05426	1.11468e-06	44.8095	98.5505	0.32927	5.26178	0.0269318	43.0045	34.229
chr16	18127074	18128144	1.09	4.88574	0.000731216	43.1337	20.2626	0.32927	5.26178	0.0269318	43.0045	34.229
chr7	28442629	28443100	1.01948	4.92275	0.00111423	43.1858	21.3033	0.32927	5.26178	0.0269318	43.0045	34.229
chr11	72550012	72550932	1.08126	5.87242	9.62827e-06	85.2156	40.2743	0.32838	6.20681	0.0124258	82.7682	65.919
chr5	148379421	148380318	1.07671	5.46204	8.15547e-05	64.0174	30.3511	0.32733	5.81034	0.0178158	62.8571	50.0978
chr9	57272707	57273584	1.07671	5.46204	8.15547e-05	64.0174	30.3511	0.32733	5.81034	0.0178158	62.8571	50.0978
chr15	79455370	79455941	1.13956	4.48864	0.00194202	33.3224	15.125	0.32522	4.90689	0.0342371	33.5793	26.8022
chr4	134606052	134606556	1.04471	4.53841	0.00297372	33.3766	16.179	0.32522	4.90689	0.0342371	33.5793	26.8022
chr8	79360997	79361717	1.24145	4.43518	0.00121376	33.2644	14.0691	0.32522	4.90689	0.0342371	33.5793	26.8022
chr15	58214451	58215791	1.16182	6.16797	2.48694e-07	107.551	48.07	0.32513	6.53338	0.0089945	103.677	82.7573
chr9	45943919	45944329	1.22439	4.71313	0.000484496	40.0943	17.1595	0.32332	5.16658	0.0301988	40.1754	32.1092
chr9	119087850	119088941	1.98191	5.07487	6.60415e-09	66.988	16.9583	0.32332	5.8968	0.0161395	66.6466	53.266
chr11	3853205	3854037	1.00751	5.42899	0.000202793	61.0851	30.3839	0.32279	5.74593	0.0197581	60.0179	47.9857
chr14	76851346	76852244	1.45126	5.19616	3.57531e-06	60.6229	22.1698	0.32279	5.74593	0.0197581	60.0179	47.9857
chr16	42189883	42190996	1.41389	5.04041	1.55904e-05	53.7187	20.1606	0.32249	5.57741	0.024232	53.3958	42.7
chr1	171920924	171921646	1.11057	4.01118	0.00607144	23.6943	10.9731	0.32096	4.43518	0.0455016	24.1787	19.3559
chr4	62806608	62807313	1.25542	3.93518	0.00381633	23.6356	9.90031	0.32096	4.43518	0.0455016	24.1787	19.3559
chr4	150031235	150031578	1.25542	3.93518	0.00381633	23.6356	9.90031	0.32096	4.43518	0.0455016	24.1787	19.3559
chr5	114268656	114269038	1.11057	4.01118	0.00607144	23.6943	10.9731	0.32096	4.43518	0.0455016	24.1787	19.3559
chr5	138754379	138755387	1.41735	3.85022	0.0022449	23.5702	8.8247	0.32096	4.43518	0.0455016	24.1787	19.3559
chr11	34762019	34762448	1.33011	3.16096	0.0184822	14.1823	5.64084	0.318	3.72972	0.0647599	14.8122	11.8821
chr12	100734551	100734881	1.07945	3.29248	0.0277233	14.2433	6.74003	0.318	3.72972	0.0647599	14.8122	11.8821
chr14	47115147	47115520	-1.17829	4.4771	0.0013994	14.8044	33.5036	0.318	3.72972	0.0647599	14.8122	11.8821
chr15	58750067	58750499	1.07945	3.29248	0.0277233	14.2433	6.74003	0.318	3.72972	0.0647599	14.8122	11.8821
chr19	16492440	16492847	-1.17829	4.4771	0.0013994	14.8044	33.5036	0.318	3.72972	0.0647599	14.8122	11.8821
chr19	31754650	31755130	1.33011	3.16096	0.0184822	14.1823	5.64084	0.318	3.72972	0.0647599	14.8122	11.8821
chr3	67557103	67557668	2.03239	2.79248	0.00259399	14.0129	3.42543	0.318	3.72972	0.0647599	14.8122	11.8821
chr3	100791510	100792135	1.07945	3.29248	0.0277233	14.2433	6.74003	0.318	3.72972	0.0647599	14.8122	11.8821
chr7	117739683	117740090	1.33011	3.16096	0.0184822	14.1823	5.64084	0.318	3.72972	0.0647599	14.8122	11.8821
chr9	42799393	42799701	1.33011	3.16096	0.0184822	14.1823	5.64084	0.318	3.72972	0.0647599	14.8122	11.8821
chr9	46735617	46736087	1.33011	3.16096	0.0184822	14.1823	5.64084	0.318	3.72972	0.0647599	14.8122	11.8821
chr9	118866920	118867336	1.33011	3.16096	0.0184822	14.1823	5.64084	0.318	3.72972	0.0647599	14.8122	11.8821
chrX	56791210	56791629	1.33011	3.16096	0.0184822	14.1823	5.64084	0.318	3.72972	0.0647599	14.8122	11.8821
chr9	109009521	109010638	1.19516	5.25785	5.59458e-05	57.8976	25.286	0.31787	5.6785	0.0218942	57.1799	45.8728
chr14	7791320	7792139	1.22005	4.31468	0.00207915	30.3727	13.038	0.31772	4.78398	0.0386805	30.7569	24.6774
chr17	24488220	24489357	1.11001	4.37242	0.00326724	30.43	14.0979	0.31772	4.78398	0.0386805	30.7569	24.6774
chr2	164175876	164176325	1.33968	4.25191	0.00125716	30.3106	11.976	0.31772	4.78398	0.0386805	30.7569	24.6774
chr4	141404629	141405300	1.22005	4.31468	0.00207915	30.3727	13.038	0.31772	4.78398	0.0386805	30.7569	24.6774
chr7	101504573	101505147	1.96107	3.92587	8.89549e-05	29.99	7.70258	0.31772	4.78398	0.0386805	30.7569	24.6774
chr1	175867648	175867873	-1.66116	2.19616	0.0402832	2.5768	8.14965	0.31741	1.29248	0.15625	2.73433	2.19432
chr19	46653031	46654110	1.13066	5.10716	0.000218354	51.0023	23.2931	0.31709	5.50141	0.0242048	50.5609	40.5847
chr11	95075990	95077163	1.29872	4.56464	0.000497533	37.1168	15.0875	0.31664	5.06464	0.0338464	37.3481	29.9882
chr2	93014139	93015518	1.03179	4.7047	0.00199951	37.2868	18.237	0.31664	5.06464	0.0338464	37.3481	29.9882
chr7	81860164	81860504	1.51065	4.45345	0.00015759	36.9824	12.9791	0.31664	5.06464	0.0338464	37.3481	29.9882
chr14	70775372	70776687	1.62919	5.28112	2.15269e-07	68.39	22.1085	0.31537	5.92118	0.0162209	67.5958	54.3229
chr4	154635326	154636895	1.04843	5.6677	4.41853e-05	73.1055	35.3462	0.3124	6.00141	0.0164393	71.3878	57.4888
chr1	58195229	58195941	1.23215	3.76178	0.00666229	20.7905	8.85019	0.31081	4.26178	0.0523526	21.3651	17.2243
chr1	152050064	152050687	1.87831	3.42275	0.00110272	20.5619	5.59288	0.31081	4.26178	0.0523526	21.3651	17.2243
chr1	160874773	160875405	1.87831	3.42275	0.00110272	20.5619	5.59288	0.31081	4.26178	0.0523526	21.3651	17.2243
chr11	23392027	23392313	-1.11155	4.9915	0.000498624	21.6414	46.7622	0.31081	4.26178	0.0523526	21.3651	17.2243
chr13	101678526	101679592	-1.25952	5.06914	9.65797e-05	21.6963	51.9444	0.31081	4.26178	0.0523526	21.3651	17.2243
chr17	35342245	35343366	1.07022	3.84674	0.0103265	20.8482	9.92891	0.31081	4.26178	0.0523526	21.3651	17.2243
chr2	60354699	60355623	1.62765	3.55426	0.00220545	20.6503	6.68272	0.31081	4.26178	0.0523526	21.3651	17.2243
chr2	152729691	152730151	1.23215	3.76178	0.00666229	20.7905	8.85019	0.31081	4.26178	0.0523526	21.3651	17.2243
chr5	3379323	3379662	-1.01446	4.94056	0.00123452	21.6055	43.6464	0.31081	4.26178	0.0523526	21.3651	17.2243
chr5	124267709	124268092	1.23215	3.76178	0.00666229	20.7905	8.85019	0.31081	4.26178	0.0523526	21.3651	17.2243
chr8	10683101	10683727	1.07022	3.84674	0.0103265	20.8482	9.92891	0.31081	4.26178	0.0523526	21.3651	17.2243
chr16	18073344	18074376	1.12115	5.48325	4.33438e-05	65.974	30.3301	0.31059	5.86162	0.0179583	64.7547	52.2124
chr8	107543782	107544211	1.02285	4.85368	0.00135236	41.2152	20.2838	0.30993	5.20681	0.030143	41.1202	33.171
chr1	17097278	17098233	1.39288	4.39721	0.000499785	34.1461	13.003	0.30906	4.95495	0.0341149	34.5227	27.8657
chr4	109963606	109964461	1.39288	4.39721	0.000499785	34.1461	13.003	0.30906	4.95495	0.0341149	34.5227	27.8657
chr5	30857332	30858078	1.64353	4.26569	0.000144249	33.9999	10.8824	0.30906	4.95495	0.0341149	34.5227	27.8657
chr6	13838444	13839114	1.5125	4.33444	0.000276477	34.0762	11.9438	0.30906	4.95495	0.0341149	34.5227	27.8657
chr11	61842679	61843445	1.32673	4.11441	0.00218883	27.4318	10.9362	0.30898	4.6496	0.0436968	27.9368	22.5509
chr13	43250647	43251119	1.07608	4.24593	0.00400634	27.5497	13.0673	0.30898	4.6496	0.0436968	27.9368	22.5509
chr17	45703226	45703676	1.32673	4.11441	0.00218883	27.4318	10.9362	0.30898	4.6496	0.0436968	27.9368	22.5509
chr19	16872238	16873158	1.07608	4.24593	0.00400634	27.5497	13.0673	0.30898	4.6496	0.0436968	27.9368	22.5509
chr2	60774163	60774984	1.07608	4.24593	0.00400634	27.5497	13.0673	0.30898	4.6496	0.0436968	27.9368	22.5509
chr3	142639934	142640647	1.07608	4.24593	0.00400634	27.5497	13.0673	0.30898	4.6496	0.0436968	27.9368	22.5509
chr9	72635196	72635508	1.1957	4.18316	0.00355685	27.4934	12.0029	0.30898	4.6496	0.0436968	27.9368	22.5509
chr14	20565384	20566189	1.37268	5.28398	5.53654e-06	62.6967	24.2118	0.30543	5.79949	0.0198654	61.9146	50.1012
chr1	156660880	156661366	1.3072	4.83621	0.000140334	44.9365	18.159	0.30458	5.33621	0.0269405	44.8956	36.351
chr3	129204368	129205205	1.39055	4.79248	8.01911e-05	44.8724	17.1152	0.30458	5.33621	0.0269405	44.8956	36.351
chr2	128294689	128295586	1.29301	5.41486	6.91185e-06	66.781	27.2533	0.30266	5.88657	0.0180225	65.7036	53.2695
chr1	143990359	143990775	1.32323	2.85022	0.0333252	11.4069	4.55864	0.30251	3.43518	0.0770862	12.0123	9.74004
chr10	13429831	13430093	1.01645	3.01118	0.0472107	11.467	5.66847	0.30251	3.43518	0.0770862	12.0123	9.74004
chr12	75329039	75329771	-1.35202	4.2539	0.00125716	11.9413	30.4824	0.30251	3.43518	0.0770862	12.0123	9.74004
chr14	53681293	53681691	1.71874	2.6427	0.0111084	11.33	3.4422	0.30251	3.43518	0.0770862	12.0123	9.74004
chr15	58667492	58668224	1.71874	2.6427	0.0111084	11.33	3.4422	0.30251	3.43518	0.0770862	12.0123	9.74004
chr15	66859278	66859723	1.01645	3.01118	0.0472107	11.467	5.66847	0.30251	3.43518	0.0770862	12.0123	9.74004
chr16	48479128	48479690	1.01645	3.01118	0.0472107	11.467	5.66847	0.30251	3.43518	0.0770862	12.0123	9.74004
chr16	50073970	50074313	1.32323	2.85022	0.0333252	11.4069	4.55864	0.30251	3.43518	0.0770862	12.0123	9.74004
chr17	4883004	4883556	2.27617	2.35022	0.00476074	11.2224	2.3168	0.30251	3.43518	0.0770862	12.0123	9.74004
chr17	27361447	27361910	1.01645	3.01118	0.0472107	11.467	5.66847	0.30251	3.43518	0.0770862	12.0123	9.74004
chr17	30454873	30455192	1.01645	3.01118	0.0472107	11.467	5.66847	0.30251	3.43518	0.0770862	12.0123	9.74004
chr17	73891696	73891953	1.71874	2.6427	0.0111084	11.33	3.4422	0.30251	3.43518	0.0770862	12.0123	9.74004
chr17	85755519	85755925	-2.03452	4.612	3.77749e-07	12.0816	49.4967	0.30251	3.43518	0.0770862	12.0123	9.74004
chr17	94758855	94759105	1.71874	2.6427	0.0111084	11.33	3.4422	0.30251	3.43518	0.0770862	12.0123	9.74004
chr2	76109584	76110076	1.71874	2.6427	0.0111084	11.33	3.4422	0.30251	3.43518	0.0770862	12.0123	9.74004
chr2	173541743	173542151	1.32323	2.85022	0.0333252	11.4069	4.55864	0.30251	3.43518	0.0770862	12.0123	9.74004
chr3	50438052	50438408	1.01645	3.01118	0.0472107	11.467	5.66847	0.30251	3.43518	0.0770862	12.0123	9.74004
chr4	63215163	63216240	1.01645	3.01118	0.0472107	11.467	5.66847	0.30251	3.43518	0.0770862	12.0123	9.74004
chr4	128998439	128998705	-1.14009	4.1427	0.00492487	11.8981	26.2227	0.30251	3.43518	0.0770862	12.0123	9.74004
chr5	100536613	100537045	1.01645	3.01118	0.0472107	11.467	5.66847	0.30251	3.43518	0.0770862	12.0123	9.74004
chr6	32974870	32975482	-1.61894	4.39395	8.19467e-05	11.996	36.8456	0.30251	3.43518	0.0770862	12.0123	9.74004
chr6	85502535	85503223	1.01645	3.01118	0.0472107	11.467	5.66847	0.30251	3.43518	0.0770862	12.0123	9.74004
chr7	43495402	43495671	1.71874	2.6427	0.0111084	11.33	3.4422	0.30251	3.43518	0.0770862	12.0123	9.74004
chr7	49910505	49910734	1.01645	3.01118	0.0472107	11.467	5.66847	0.30251	3.43518	0.0770862	12.0123	9.74004
chr8	41133543	41134122	1.01645	3.01118	0.0472107	11.467	5.66847	0.30251	3.43518	0.0770862	12.0123	9.74004
chr8	61933245	61933605	-1.19621	4.17215	0.00355685	11.9095	27.2891	0.30251	3.43518	0.0770862	12.0123	9.74004
chr8	68766774	68767094	1.01645	3.01118	0.0472107	11.467	5.66847	0.30251	3.43518	0.0770862	12.0123	9.74004
chr8	85363376	85363801	-1.08158	4.112	0.00673929	11.8862	25.1553	0.30251	3.43518	0.0770862	12.0123	9.74004
chr9	53651918	53652422	-1.02047	4.07994	0.00910715	11.8737	24.0868	0.30251	3.43518	0.0770862	12.0123	9.74004
chrX	48127945	48128192	1.01645	3.01118	0.0472107	11.467	5.66847	0.30251	3.43518	0.0770862	12.0123	9.74004
chr14	46882523	46883197	1.15244	4.67878	0.000947135	38.1866	17.1788	0.30243	5.10777	0.0337027	38.2923	31.0506
chr18	35828428	35828794	1.33602	4.58245	0.000346964	38.0668	15.0787	0.30243	5.10777	0.0337027	38.2923	31.0506
chr2	160366755	160367622	1.15244	4.67878	0.000947135	38.1866	17.1788	0.30243	5.10777	0.0337027	38.2923	31.0506
chr11	59216883	59217303	1.05322	4.44741	0.00363612	31.4289	15.1453	0.30035	4.83621	0.0384248	31.6995	25.7417
chr13	95595935	95596347	1.5158	4.2047	0.000486643	31.181	10.9041	0.30035	4.83621	0.0384248	31.6995	25.7417
chr13	117020629	117021069	1.1551	4.39395	0.00237138	31.3741	14.088	0.30035	4.83621	0.0384248	31.6995	25.7417
chr7	105708418	105709431	-1.50495	5.78966	1.38804e-08	32.8355	93.1919	0.30035	4.83621	0.0384248	31.6995	25.7417
chr8	79384683	79385066	1.38477	4.27345	0.000871903	31.251	11.9676	0.30035	4.83621	0.0384248	31.6995	25.7417
chr8	82402230	82403328	1.5158	4.2047	0.000486643	31.181	10.9041	0.30035	4.83621	0.0384248	31.6995	25.7417
chr1	14309568	14310439	1.20468	5.01118	0.00016324	48.9598	21.2419	0.30026	5.45495	0.0268685	48.6738	39.5284
chr1	134651548	134652304	1.13761	5.04638	0.00026341	49.016	22.2784	0.30026	5.45495	0.0268685	48.6738	39.5284
chr12	91709142	91709624	1.16758	4.03841	0.00437143	24.6275	10.9634	0.29863	4.50141	0.0450466	25.1193	20.4226
chr16	38756689	38756905	1.31243	3.96241	0.00267143	24.5665	9.89152	0.29863	4.50141	0.0450466	25.1193	20.4226
chr5	36399005	36399302	1.47436	3.87744	0.0022449	24.4985	8.81686	0.29863	4.50141	0.0450466	25.1193	20.4226
chr7	133670626	133671325	-1.34082	5.35454	8.20859e-06	25.7078	65.1166	0.29863	4.50141	0.0450466	25.1193	20.4226
chr8	64692565	64693235	1.03654	4.10716	0.00673929	24.6828	12.0327	0.29863	4.50141	0.0450466	25.1193	20.4226
chr8	125254152	125254819	1.65794	3.78112	0.00122449	24.4217	7.73903	0.29863	4.50141	0.0450466	25.1193	20.4226
chrX	99216617	99217332	1.31243	3.96241	0.00267143	24.5665	9.89152	0.29863	4.50141	0.0450466	25.1193	20.4226
chr7	46883210	46884393	1.12871	5.6649	1.51862e-05	75.0225	34.3097	0.29823	6.04638	0.0183602	73.2875	59.6009
chr1	40213386	40214050	1.2046	3.56464	0.0116399	17.9628	7.79387	0.29818	4.06464	0.0540158	18.555	15.0903
chr1	51915626	51916235	2.36947	2.95345	0.000317097	17.6083	3.40749	0.29818	4.06464	0.0540158	18.555	15.0903
chr1	90928011	90929052	1.02102	3.66096	0.0174598	18.0194	8.87934	0.29818	4.06464	0.0540158	18.555	15.0903
chr10	61423296	61423622	1.02102	3.66096	0.0174598	18.0194	8.87934	0.29818	4.06464	0.0540158	18.555	15.0903
chr11	117101319	117102009	1.2046	3.56464	0.0116399	17.9628	7.79387	0.29818	4.06464	0.0540158	18.555	15.0903
chr18	76150853	76151389	1.02102	3.66096	0.0174598	18.0194	8.87934	0.29818	4.06464	0.0540158	18.555	15.0903
chr2	119129031	119129790	-1.22559	4.83974	0.000332371	18.7257	43.7901	0.29818	4.06464	0.0540158	18.555	15.0903
chr4	106617053	106617481	1.02102	3.66096	0.0174598	18.0194	8.87934	0.29818	4.06464	0.0540158	18.555	15.0903
chr4	114821567	114822196	1.2046	3.56464	0.0116399	17.9628	7.79387	0.29818	4.06464	0.0540158	18.555	15.0903
chr8	53607086	53607463	1.41653	3.45345	0.00716299	17.8978	6.70474	0.29818	4.06464	0.0540158	18.555	15.0903
chrX	103440885	103441308	1.2046	3.56464	0.0116399	17.9628	7.79387	0.29818	4.06464	0.0540158	18.555	15.0903
chr2	11171845	11172802	1.06285	5.96574	7.60831e-06	90.332	43.2405	0.29798	6.30262	0.0127812	87.5246	71.1914
chr14	66257438	66258123	1.38179	4.69937	0.000138709	41.9403	16.0943	0.29727	5.24593	0.0300797	42.0653	34.2325
chr2	33726719	33728048	1.81097	5.07678	9.44442e-08	63.2179	18.017	0.29724	5.82553	0.0199118	62.8632	51.1587
chr11	51544417	51544822	1.32312	4.47418	0.000599741	35.1571	14.0512	0.29394	5.00141	0.037644	35.4663	28.9289
chr14	76856594	76857147	1.22124	4.52764	0.000999569	35.2184	15.1057	0.29394	5.00141	0.037644	35.4663	28.9289
chr4	155234965	155235966	1.68382	4.28493	9.4792e-05	34.9407	10.8756	0.29394	5.00141	0.037644	35.4663	28.9289
chr7	3292767	3293205	1.43316	4.41645	0.000342709	35.0909	12.9948	0.29394	5.00141	0.037644	35.4663	28.9289
chr5	122601874	122602775	1.25977	4.89232	0.000166988	45.9567	19.192	0.29317	5.372	0.0269326	45.8414	37.4116
chr10	122678521	122679686	1.79225	5.59922	3.40827e-10	90.2182	26.048	0.29238	6.32103	0.0142013	88.4761	72.2455
chr17	29193176	29193911	2.07855	3.76958	9.78546e-05	28.0291	6.63595	0.29023	4.70681	0.0432574	28.8786	23.6161
chr5	63886651	63887479	1.12561	4.26958	0.00400634	28.49	13.0572	0.29023	4.70681	0.0432574	28.8786	23.6161
chr6	29178936	29179744	1.24523	4.20681	0.00254061	28.4317	11.9936	0.29023	4.70681	0.0432574	28.8786	23.6161
chr7	19800796	19801233	1.37627	4.13806	0.00152436	28.3681	10.9278	0.29023	4.70681	0.0432574	28.8786	23.6161
chr9	75402234	75402539	1.12561	4.26958	0.00400634	28.49	13.0572	0.29023	4.70681	0.0432574	28.8786	23.6161
chr13	20185144	20185432	1.16638	5.06012	0.000189655	49.9811	22.2684	0.28987	5.48792	0.0268358	49.6203	40.5882
chr12	111337494	111338489	1.0208	6.18589	3.28199e-06	103.701	51.1085	0.28964	6.49735	0.0121675	99.8835	81.7152
chr1	74748603	74749116	1.27757	4.6496	0.000412854	39.0808	16.1204	0.28906	5.1496	0.0335542	39.2368	32.1127
chr12	40108085	40109118	1.4743	4.54638	0.000133448	38.9494	14.0182	0.28906	5.1496	0.0335542	39.2368	32.1127
chr5	111266815	111267721	1.19138	6.15246	2.13272e-07	107.497	47.0711	0.28894	6.55164	0.0111902	103.689	84.8694
chr1	87510014	87510651	1.13451	3.87744	0.00751021	21.7765	9.91897	0.28612	4.33621	0.0515594	22.3047	18.2921
chr1	180109027	180109418	1.29644	3.79248	0.00469388	21.7162	8.84133	0.28612	4.33621	0.0515594	22.3047	18.2921
chr14	61971126	61972054	1.29644	3.79248	0.00469388	21.7162	8.84133	0.28612	4.33621	0.0515594	22.3047	18.2921
chr16	23282115	23282934	1.29644	3.79248	0.00469388	21.7162	8.84133	0.28612	4.33621	0.0515594	22.3047	18.2921
chr5	25082262	25082881	1.13451	3.87744	0.00751021	21.7765	9.91897	0.28612	4.33621	0.0515594	22.3047	18.2921
chr10	84383035	84383962	1.19516	5.25785	5.59458e-05	57.8976	25.286	0.28501	5.69508	0.0242234	57.1859	46.9346
chr10	128423926	128425140	1.19889	4.41486	0.00170443	32.3189	14.0784	0.28421	4.88657	0.038166	32.6424	26.8057
chr11	120198896	120199457	1.70444	4.1496	0.000167284	32.0405	9.83131	0.28421	4.88657	0.038166	32.6424	26.8057
chr2	165654835	165655386	2.26188	3.85712	1.39889e-05	31.7363	6.61703	0.28421	4.88657	0.038166	32.6424	26.8057
chr5	24733754	24734267	1.00216	4.51809	0.00400542	32.4279	16.1898	0.28421	4.88657	0.038166	32.6424	26.8057
chr7	126470124	126470446	1.19889	4.41486	0.00170443	32.3189	14.0784	0.28421	4.88657	0.038166	32.6424	26.8057
chr11	118981058	118981273	1.17103	3.33621	0.0203304	15.1551	6.73042	0.2819	3.83621	0.0632032	15.7487	12.9535
chr13	15590590	15590934	1.17103	3.33621	0.0203304	15.1551	6.73042	0.2819	3.83621	0.0632032	15.7487	12.9535
chr18	34631050	34631664	-1.50422	4.73989	4.39758e-05	15.8651	45.0045	0.2819	3.83621	0.0632032	15.7487	12.9535
chr6	31239985	31240450	1.17103	3.33621	0.0203304	15.1551	6.73042	0.2819	3.83621	0.0632032	15.7487	12.9535
chr6	31644520	31644990	-1.25356	4.60837	0.000585502	15.7972	37.665	0.2819	3.83621	0.0632032	15.7487	12.9535
chr8	25353850	25354429	1.72847	3.04373	0.00739288	15.0112	4.52996	0.2819	3.83621	0.0632032	15.7487	12.9535
chr5	33721488	33722477	1.11458	5.57201	3.00787e-05	70.0009	32.3281	0.28047	5.95887	0.0181895	68.5512	56.4396
chr12	25189274	25190976	1.26169	5.03841	8.1812e-05	50.888	21.2231	0.27996	5.52014	0.0267982	50.567	41.6477
chr13	12340164	12341052	1.06955	5.13922	0.000341178	51.0557	24.3264	0.27996	5.52014	0.0267982	50.567	41.6477
chr9	64078066	64079010	1.06955	5.13922	0.000341178	51.0557	24.3264	0.27996	5.52014	0.0267982	50.567	41.6477
chr19	25052312	25052785	1.16562	4.59615	0.00115055	36.2261	16.1486	0.27978	5.04638	0.0373826	36.4101	29.9917
chr1	85580034	85580940	-1.06232	3.7047	0.0128651	9.02254	18.8417	0.27973	3.06464	0.0927353	9.21833	7.59357
chr1	90248148	90248555	-1.64646	4.01118	0.000296516	9.11319	28.5301	0.27973	3.06464	0.0927353	9.21833	7.59357
chr1	177081988	177082602	-1.06232	3.7047	0.0128651	9.02254	18.8417	0.27973	3.06464	0.0927353	9.21833	7.59357
chr10	25064510	25065089	1.87985	2.16096	0.0134277	8.57947	2.33115	0.27973	3.06464	0.0927353	9.21833	7.59357
chr11	109882790	109883282	-1.14091	3.74593	0.0093272	9.03468	19.9232	0.27973	3.06464	0.0927353	9.21833	7.59357
chr16	22016686	22016913	1.87985	2.16096	0.0134277	8.57947	2.33115	0.27973	3.06464	0.0927353	9.21833	7.59357
chr19	10169238	10169518	-1.4779	3.92275	0.00152653	9.08694	25.3111	0.27973	3.06464	0.0927353	9.21833	7.59357
chr2	28014590	28015101	-1.21524	3.78493	0.00666229	9.04618	21.0033	0.27973	3.06464	0.0927353	9.21833	7.59357
chr3	10301898	10302146	1.87985	2.16096	0.0134277	8.57947	2.33115	0.27973	3.06464	0.0927353	9.21833	7.59357
chr3	148503206	148503770	-1.35283	3.85712	0.00326531	9.06751	23.1596	0.27973	3.06464	0.0927353	9.21833	7.59357
chr5	151292304	151292635	1.32241	2.45345	0.0268555	8.66171	3.46352	0.27973	3.06464	0.0927353	9.21833	7.59357
chr6	120306929	120307244	1.32241	2.45345	0.0268555	8.66171	3.46352	0.27973	3.06464	0.0927353	9.21833	7.59357
chr8	126297350	126297694	1.32241	2.45345	0.0268555	8.66171	3.46352	0.27973	3.06464	0.0927353	9.21833	7.59357
chrX	8223378	8223879	-1.14091	3.74593	0.0093272	9.03468	19.9232	0.27973	3.06464	0.0927353	9.21833	7.59357
chrX	164164634	164165175	-1.06232	3.7047	0.0128651	9.02254	18.8417	0.27973	3.06464	0.0927353	9.21833	7.59357
chr2	26503025	26504328	1.31675	5.62337	1.19452e-06	77.8025	31.2329	0.27859	6.11125	0.0184553	76.1378	62.7678
chr11	5214324	5215098	1.22251	4.06464	0.00311044	25.5615	10.954	0.27827	4.56464	0.0445928	26.0602	21.4887
chr11	102572677	102573151	1.22251	4.06464	0.00311044	25.5615	10.954	0.27827	4.56464	0.0445928	26.0602	21.4887
chr12	84384549	84385072	1.22251	4.06464	0.00311044	25.5615	10.954	0.27827	4.56464	0.0445928	26.0602	21.4887
chr13	76579444	76579954	1.09148	4.13339	0.00492487	25.6188	12.0224	0.27827	4.56464	0.0445928	26.0602	21.4887
chr14	115206319	115206973	2.48223	3.40368	2.21198e-05	25.0163	4.47709	0.27827	4.56464	0.0445928	26.0602	21.4887
chr16	95244673	95245452	1.36736	3.98864	0.00267143	25.4982	9.88306	0.27827	4.56464	0.0445928	26.0602	21.4887
chr2	167313615	167314380	1.52929	3.90368	0.00152653	25.4276	8.80932	0.27827	4.56464	0.0445928	26.0602	21.4887
chr3	8968708	8969154	1.71287	3.80735	0.000808164	25.3479	7.73241	0.27827	4.56464	0.0445928	26.0602	21.4887
chr6	5589517	5590167	1.09148	4.13339	0.00492487	25.6188	12.0224	0.27827	4.56464	0.0445928	26.0602	21.4887
chr9	115367722	115368302	1.22251	4.06464	0.00311044	25.5615	10.954	0.27827	4.56464	0.0445928	26.0602	21.4887
chr9	37529761	37530649	1.00894	5.27921	0.000355528	55.0885	27.3741	0.27807	5.62515	0.0266609	54.3492	44.8213
chr16	84583286	84584471	1.50985	4.56335	9.00772e-05	39.8989	14.0104	0.27645	5.19023	0.0334017	40.1814	33.1745
chr19	47138181	47138487	1.14104	4.75686	0.000780577	40.1515	18.206	0.27645	5.19023	0.0334017	40.1814	33.1745
chr2	19553644	19554655	1.61989	4.50561	4.67067e-05	39.8238	12.9571	0.27645	5.19023	0.0334017	40.1814	33.1745
chr15	80006114	80006883	2.14976	4.36226	1.08242e-06	43.3253	9.76335	0.27392	5.32103	0.0299339	43.956	36.3545
chr18	12643057	12644521	2.14976	4.36226	1.08242e-06	43.3253	9.76335	0.27392	5.32103	0.0299339	43.956	36.3545
chr5	65842407	65843376	1.18022	5.55817	1.35566e-05	70.9278	31.2994	0.27357	5.98217	0.0182374	69.5006	57.4959
chr12	116138378	116139144	1.91458	3.90368	0.000140455	29.0601	7.70816	0.27292	4.76178	0.0428248	29.8206	24.6809
chr13	52512178	52512822	1.17357	4.29248	0.00290114	29.431	13.0475	0.27292	4.76178	0.0428248	29.8206	24.6809
chr16	50009431	50010006	1.29319	4.22972	0.00179595	29.3708	11.9847	0.27292	4.76178	0.0428248	29.8206	24.6809
chr16	57549004	57549950	1.17535	4.99718	0.000228536	47.9963	21.2516	0.27198	5.44094	0.0295856	47.7335	39.532
chr18	5100847	5101636	1.48213	4.83621	2.53147e-05	47.745	17.0908	0.27198	5.44094	0.0295856	47.7335	39.532
chr19	6401289	6401919	1.0804	5.90689	8.03602e-06	87.2504	41.2606	0.27174	6.26812	0.0155371	84.6825	70.1444
chr12	80069071	80069579	1.2783	3.59984	0.00827042	18.8826	7.78493	0.27061	4.1496	0.0590797	19.4933	16.1594
chr14	52217296	52217856	-1.01076	4.80089	0.00181792	19.6371	39.568	0.27061	4.1496	0.0590797	19.4933	16.1594
chr16	23401455	23402017	1.09472	3.69616	0.0128651	18.9421	8.86915	0.27061	4.1496	0.0590797	19.4933	16.1594
chr17	70706949	70707492	1.2783	3.59984	0.00827042	18.8826	7.78493	0.27061	4.1496	0.0590797	19.4933	16.1594
chr18	75431313	75431724	2.44317	2.98864	0.000183582	18.5099	3.40358	0.27061	4.1496	0.0590797	19.4933	16.1594
chr18	80554451	80555523	1.2783	3.59984	0.00827042	18.8826	7.78493	0.27061	4.1496	0.0590797	19.4933	16.1594
chr2	10098686	10099163	1.2783	3.59984	0.00827042	18.8826	7.78493	0.27061	4.1496	0.0590797	19.4933	16.1594
chr3	9973809	9974994	1.74089	3.35712	0.002639	18.7337	5.60486	0.27061	4.1496	0.0590797	19.4933	16.1594
chr3	50381559	50381999	2.04767	3.19616	0.00126672	18.6356	4.50749	0.27061	4.1496	0.0590797	19.4933	16.1594
chr3	89953324	89953813	1.2783	3.59984	0.00827042	18.8826	7.78493	0.27061	4.1496	0.0590797	19.4933	16.1594
chr5	90194917	90195374	1.09472	3.69616	0.0128651	18.9421	8.86915	0.27061	4.1496	0.0590797	19.4933	16.1594
chr3	109361916	109362757	1.747	4.16993	0.000108988	32.9778	9.82479	0.26916	4.93518	0.0379054	33.5854	27.8692
chr4	105109447	105110631	1.24145	4.43518	0.00121376	33.2644	14.0691	0.26916	4.93518	0.0379054	33.5854	27.8692
chr18	68397354	68398453	-1.15091	6.53766	1.12719e-08	62.3449	138.44	0.26844	5.75042	0.0241936	59.0818	49.0506
chr6	136940712	136942057	1.0911	6.16321	1.02846e-06	104.602	49.1004	0.26666	6.52262	0.0134547	100.842	83.8241
chrX	107402577	107403770	1.20387	4.61441	0.000824039	37.1771	16.139	0.26648	5.08995	0.0371218	37.3541	31.0541
chr11	4007023	4008146	1.65462	4.5222	3.07581e-05	40.772	12.9501	0.26454	5.22972	0.0332459	41.1263	34.236
chr16	15729233	15730419	-1.06887	5.95119	7.60831e-06	42.7174	89.6121	0.26454	5.22972	0.0332459	41.1263	34.236
chr10	86295902	86296516	1.19617	3.90689	0.00538776	22.7056	9.90945	0.26386	4.40689	0.0507925	23.2445	19.3594
chr12	85629585	85630357	1.75361	3.61441	0.00145359	22.49	6.66963	0.26386	4.40689	0.0507925	23.2445	19.3594
chr16	31235450	31235871	1.19617	3.90689	0.00538776	22.7056	9.90945	0.26386	4.40689	0.0507925	23.2445	19.3594
chr16	45609094	45609680	1.19617	3.90689	0.00538776	22.7056	9.90945	0.26386	4.40689	0.0507925	23.2445	19.3594
chr17	13759847	13760983	1.19617	3.90689	0.00538776	22.7056	9.90945	0.26386	4.40689	0.0507925	23.2445	19.3594
chr2	72202145	72202707	1.05132	3.98289	0.00832654	22.762	10.9832	0.26386	4.40689	0.0507925	23.2445	19.3594
chr2	135537375	135537851	1.19617	3.90689	0.00538776	22.7056	9.90945	0.26386	4.40689	0.0507925	23.2445	19.3594
chr3	98299529	98300282	1.54168	3.72561	0.00183674	22.5717	7.75306	0.26386	4.40689	0.0507925	23.2445	19.3594
chr5	123191417	123191863	-1.10522	5.11441	0.000341178	23.6178	50.8092	0.26386	4.40689	0.0507925	23.2445	19.3594
chr11	62675474	62676290	1.74177	5.04373	3.51662e-07	60.3222	18.0365	0.26063	5.77729	0.0241734	60.0299	50.1084
chr11	9113136	9113781	1.54284	5.23989	7.34656e-07	64.5038	22.1382	0.26046	5.86566	0.0220243	63.8178	53.2766
chr9	15044422	15045741	1.35926	5.33621	4.69062e-06	64.7067	25.2215	0.26046	5.86566	0.0220243	63.8178	53.2766
chr10	19059253	19059538	-1.33492	4.35712	0.000723093	12.9032	32.55	0.25981	3.56464	0.0743909	12.947	10.8133
chr10	42142011	42142509	-1.02814	4.19616	0.0073873	12.8357	26.177	0.25981	3.56464	0.0743909	12.947	10.8133
chr11	80308592	80309023	1.1284	3.06464	0.035408	12.3706	5.65859	0.25981	3.56464	0.0743909	12.947	10.8133
chr16	45676512	45676778	2.38812	2.40368	0.0027771	12.1067	2.31276	0.25981	3.56464	0.0743909	12.947	10.8133
chr17	6798478	6799085	-1.02814	4.19616	0.0073873	12.8357	26.177	0.25981	3.56464	0.0743909	12.947	10.8133
chr18	49852797	49853164	-1.02814	4.19616	0.0073873	12.8357	26.177	0.25981	3.56464	0.0743909	12.947	10.8133
chr2	156561650	156562197	-1.24007	4.30735	0.00207915	12.8823	30.4293	0.25981	3.56464	0.0743909	12.947	10.8133
chr3	121874518	121874952	1.1284	3.06464	0.035408	12.3706	5.65859	0.25981	3.56464	0.0743909	12.947	10.8133
chr5	45690811	45691151	1.1284	3.06464	0.035408	12.3706	5.65859	0.25981	3.56464	0.0743909	12.947	10.8133
chr7	84272425	84272775	1.1284	3.06464	0.035408	12.3706	5.65859	0.25981	3.56464	0.0743909	12.947	10.8133
chr8	35123273	35123621	1.1284	3.06464	0.035408	12.3706	5.65859	0.25981	3.56464	0.0743909	12.947	10.8133
chr9	57218356	57218725	-1.19007	4.28112	0.00290114	12.8713	29.3677	0.25981	3.56464	0.0743909	12.947	10.8133
chrX	101515769	101516042	1.1284	3.06464	0.035408	12.3706	5.65859	0.25981	3.56464	0.0743909	12.947	10.8133
chr10	126986528	126986984	1.27552	4.08995	0.00311044	26.4962	10.945	0.25962	4.62515	0.0479808	27.0013	22.5544
chr11	57812172	57812700	1.14449	4.15871	0.00355685	26.5557	12.0125	0.25962	4.62515	0.0479808	27.0013	22.5544
chr17	78163371	78164163	1.14449	4.15871	0.00355685	26.5557	12.0125	0.25962	4.62515	0.0479808	27.0013	22.5544
chr17	80763031	80763738	1.27552	4.08995	0.00311044	26.4962	10.945	0.25962	4.62515	0.0479808	27.0013	22.5544
chr18	36122085	36122682	1.02487	4.22147	0.00547208	26.6102	13.0777	0.25962	4.62515	0.0479808	27.0013	22.5544
chr4	9843135	9843458	1.02487	4.22147	0.00547208	26.6102	13.0777	0.25962	4.62515	0.0479808	27.0013	22.5544
chr7	29505358	29506175	1.27552	4.08995	0.00311044	26.4962	10.945	0.25962	4.62515	0.0479808	27.0013	22.5544
chr8	70261122	70261554	-1.01725	5.29295	0.000395207	27.5566	55.7761	0.25962	4.62515	0.0479808	27.0013	22.5544
chr9	121950373	121951334	1.14449	4.15871	0.00355685	26.5557	12.0125	0.25962	4.62515	0.0479808	27.0013	22.5544
chr13	96985598	96986120	2.17299	3.81468	3.74547e-05	29.8814	6.6262	0.25688	4.81468	0.0423997	30.7629	25.7453
chr17	31840456	31841142	1.61556	4.10716	0.000385471	30.1678	9.84493	0.25688	4.81468	0.0423997	30.7629	25.7453
chr17	86957816	86958329	1.00812	4.42587	0.00490086	30.4831	15.156	0.25688	4.81468	0.0423997	30.7629	25.7453
chr2	38533255	38533628	1.00812	4.42587	0.00490086	30.4831	15.156	0.25688	4.81468	0.0423997	30.7629	25.7453
chr4	46614630	46615029	1.22005	4.31468	0.00207915	30.3727	13.038	0.25688	4.81468	0.0423997	30.7629	25.7453
chr4	120283212	120283465	1.96107	3.92587	8.89549e-05	29.99	7.70258	0.25688	4.81468	0.0423997	30.7629	25.7453
chr6	115946403	115946959	1.00812	4.42587	0.00490086	30.4831	15.156	0.25688	4.81468	0.0423997	30.7629	25.7453
chr11	95143053	95143561	1.28284	4.45495	0.000856774	34.2104	14.06	0.25511	4.98217	0.037644	34.5287	28.9324
chr3	54797092	54797849	1.28284	4.45495	0.000856774	34.2104	14.06	0.25511	4.98217	0.037644	34.5287	28.9324
chr11	70539860	70540631	1.02886	5.8474	2.3943e-05	82.2434	40.3072	0.25501	6.19334	0.0185455	79.9397	66.988
chr10	120826384	120827232	1.06909	4.72251	0.00147332	38.2411	18.2264	0.25398	5.13222	0.0368624	38.2983	32.1163
chr15	99332853	99333721	2.10538	4.17878	4.8411e-06	37.5689	8.73063	0.25398	5.13222	0.0368624	38.2983	32.1163
chr9	72766456	72767340	1.33602	4.58245	0.000346964	38.0668	15.0787	0.25398	5.13222	0.0368624	38.2983	32.1163
chr13	113212209	113212966	1.11458	5.57201	3.00787e-05	70.0009	32.3281	0.25376	5.97236	0.0201042	68.5571	57.4995
chr2	172738808	172740295	1.41032	5.41684	1.2955e-06	69.6475	26.2034	0.25376	5.97236	0.0201042	68.5571	57.4995
chr15	98733027	98733850	1.20971	4.78966	0.000401168	42.064	18.1866	0.25328	5.26812	0.0330876	42.0713	35.2972
chr1	134195325	134196767	1.37831	4.94892	3.91776e-05	49.8001	19.1566	0.25274	5.50666	0.0293915	49.6263	41.6513
chr11	67921472	67922606	1.81481	3.08496	0.00485158	15.9156	4.52387	0.25071	3.93518	0.0617426	16.6856	14.024
chr11	69864358	69864833	-1.16722	4.6496	0.000947135	16.7489	37.6144	0.25071	3.93518	0.0617426	16.6856	14.024
chr14	22783230	22783994	1.81481	3.08496	0.00485158	15.9156	4.52387	0.25071	3.93518	0.0617426	16.6856	14.024
chr18	77849107	77849667	-1.12736	4.62869	0.00130877	16.7375	36.5646	0.25071	3.93518	0.0617426	16.6856	14.024
chr2	119915950	119916378	-1.51272	4.83089	2.53147e-05	16.8483	48.0762	0.25071	3.93518	0.0617426	16.6856	14.024
chr3	19321099	19321542	-1.16722	4.6496	0.000947135	16.7489	37.6144	0.25071	3.93518	0.0617426	16.6856	14.024
chr9	43096276	43096693	1.04545	3.48864	0.0219187	16.1265	7.81322	0.25071	3.93518	0.0617426	16.6856	14.024
chr9	121967799	121968584	1.81481	3.08496	0.00485158	15.9156	4.52387	0.25071	3.93518	0.0617426	16.6856	14.024
chr10	12518146	12518877	1.34858	3.63339	0.0057893	19.8035	7.77641	0.24609	4.22972	0.0578634	20.432	17.2279
chr10	128850266	128850710	1.00307	3.81468	0.0139908	19.9209	9.9393	0.24609	4.22972	0.0578634	20.432	17.2279
chr18	69196073	69197344	1.165	3.72972	0.0093272	19.8658	8.85945	0.24609	4.22972	0.0578634	20.432	17.2279
chr19	41384439	41384784	1.5605	3.5222	0.00330817	19.7318	6.68972	0.24609	4.22972	0.0578634	20.432	17.2279
chr2	29456627	29457388	1.5605	3.5222	0.00330817	19.7318	6.68972	0.24609	4.22972	0.0578634	20.432	17.2279
chr9	72405870	72406265	-1.29832	5.0222	8.1812e-05	20.7212	50.9623	0.24609	4.22972	0.0578634	20.432	17.2279
chr2	93187250	93187922	1.20412	5.37242	2.77963e-05	62.8778	27.291	0.24587	5.82955	0.0241239	61.9265	52.2232
chr10	75589151	75589518	1.86589	4.93054	1.78037e-07	58.2218	15.9734	0.24514	5.73888	0.0264337	58.1397	49.0543
chr4	100095620	100096698	1.13066	5.10716	0.000218354	51.0023	23.2931	0.24377	5.53841	0.029291	50.5729	42.7106
chr1	167598128	167598766	1.60093	3.7539	0.00183674	23.4963	7.74591	0.24368	4.47418	0.0500517	24.1847	20.4261
chr12	32197879	32198410	-1.2079	5.22766	7.81894e-05	24.6534	56.9496	0.24368	4.47418	0.0500517	24.1847	20.4261
chr12	100996519	100996960	-1.1822	5.21418	0.000108702	24.6425	55.9196	0.24368	4.47418	0.0500517	24.1847	20.4261
chr18	38024930	38025825	1.25542	3.93518	0.00381633	23.6356	9.90031	0.24368	4.47418	0.0500517	24.1847	20.4261
chr19	55941390	55941772	-1.23313	5.2409	5.59458e-05	24.664	57.9792	0.24368	4.47418	0.0500517	24.1847	20.4261
chr4	118272910	118273664	1.41735	3.85022	0.0022449	23.5702	8.8247	0.24368	4.47418	0.0500517	24.1847	20.4261
chr5	107874965	107875230	-1.1822	5.21418	0.000108702	24.6425	55.9196	0.24368	4.47418	0.0500517	24.1847	20.4261
chr7	47022497	47023011	2.37029	3.35022	6.53788e-05	23.1889	4.4849	0.24368	4.47418	0.0500517	24.1847	20.4261
chr9	115390658	115391428	1.60093	3.7539	0.00183674	23.4963	7.74591	0.24368	4.47418	0.0500517	24.1847	20.4261
chr18	80609639	80609914	1.09	4.88574	0.000731216	43.1337	20.2626	0.24261	5.30551	0.0329273	43.0165	36.3582
chr2	167840220	167840814	1.01948	4.92275	0.00111423	43.1858	21.3033	0.24261	5.30551	0.0329273	43.0165	36.3582
chr1	92774440	92775739	1.1957	4.18316	0.00355685	27.4934	12.0029	0.24248	4.68316	0.0473382	27.9428	23.6197
chr13	52035602	52036251	1.4743	4.54638	0.000133448	38.9494	14.0182	0.24219	5.17326	0.0366046	39.2427	33.1781
chr17	83772705	83773074	1.18884	4.69616	0.000679994	39.1402	17.169	0.24219	5.17326	0.0366046	39.2427	33.1781
chr10	10355489	10356101	1.5158	4.2047	0.000486643	31.181	10.9041	0.242	4.86566	0.0419826	31.7055	26.8092
chr17	45517556	45518198	1.38477	4.27345	0.000871903	31.251	11.9676	0.242	4.86566	0.0419826	31.7055	26.8092
chr6	56568498	56569353	1.38477	4.27345	0.000871903	31.251	11.9676	0.242	4.86566	0.0419826	31.7055	26.8092
chr7	113855307	113855873	1.26515	4.33621	0.00147553	31.3151	13.0289	0.242	4.86566	0.0419826	31.7055	26.8092
chr9	51278447	51279439	2.00616	3.94741	5.59555e-05	30.9205	7.69717	0.242	4.86566	0.0419826	31.7055	26.8092
chr15	84263579	84264292	1.03766	4.62396	0.00243645	35.3293	17.2095	0.24196	5.02764	0.040781	35.4723	29.9953
chr5	47982742	47983722	1.22124	4.52764	0.000999569	35.2184	15.1057	0.24196	5.02764	0.040781	35.4723	29.9953
chr8	72136170	72137250	1.03766	4.62396	0.00243645	35.3293	17.2095	0.24196	5.02764	0.040781	35.4723	29.9953
chr10	95273887	95274258	-1.2323	3.2539	0.0129375	6.22359	14.6218	0.24135	2.56464	0.112793	6.43223	5.44135
chr11	115345013	115345278	-1.00263	3.13339	0.035408	6.19917	12.421	0.24135	2.56464	0.112793	6.43223	5.44135
chr13	45859348	45859838	-2.13132	3.72561	3.91419e-05	6.32009	27.6895	0.24135	2.56464	0.112793	6.43223	5.44135
chr13	97546946	97547462	-1.60111	3.44741	0.002639	6.263	19.0005	0.24135	2.56464	0.112793	6.43223	5.44135
chr14	103258458	103259029	-1.33419	3.30735	0.00889456	6.23445	15.7191	0.24135	2.56464	0.112793	6.43223	5.44135
chr15	97105018	97105379	-1.12226	3.19616	0.0184822	6.21188	13.5225	0.24135	2.56464	0.112793	6.43223	5.44135
chr2	112196916	112197207	-1.12226	3.19616	0.0184822	6.21188	13.5225	0.24135	2.56464	0.112793	6.43223	5.44135
chr3	152425554	152425917	-1.12226	3.19616	0.0184822	6.21188	13.5225	0.24135	2.56464	0.112793	6.43223	5.44135
chr5	151137962	151138468	-1.51777	3.40368	0.00401127	6.25407	17.9083	0.24135	2.56464	0.112793	6.43223	5.44135
chr6	13652323	13652847	-2.01669	3.66546	0.000105495	6.3077	25.5244	0.24135	2.56464	0.112793	6.43223	5.44135
chr7	41611721	41611991	-1.00263	3.13339	0.035408	6.19917	12.421	0.24135	2.56464	0.112793	6.43223	5.44135
chr7	79649075	79649318	-1.2323	3.2539	0.0129375	6.22359	14.6218	0.24135	2.56464	0.112793	6.43223	5.44135
chr7	81626528	81626834	-1.00263	3.13339	0.035408	6.19917	12.421	0.24135	2.56464	0.112793	6.43223	5.44135
chr8	34521343	34521742	2.294	1.40368	0.0273438	5.8591	1.19472	0.24135	2.56464	0.112793	6.43223	5.44135
chr9	7965368	7965784	-2.01669	3.66546	0.000105495	6.3077	25.5244	0.24135	2.56464	0.112793	6.43223	5.44135
chr9	53572851	53573227	-1.00263	3.13339	0.035408	6.19917	12.421	0.24135	2.56464	0.112793	6.43223	5.44135
chrX	93329195	93329532	-1.12226	3.19616	0.0184822	6.21188	13.5225	0.24135	2.56464	0.112793	6.43223	5.44135
chr1	172513565	172514592	1.30072	5.90468	1.80573e-07	94.0298	38.1688	0.23671	6.39487	0.0186314	91.343	77.521
chr8	31111393	31112736	1.04733	5.74593	3.06436e-05	77.1498	37.33	0.23648	6.11441	0.0219156	75.1994	63.8303
chr11	19939069	19939817	1.10827	5.03237	0.00036358	48.0515	22.2886	0.23386	5.46018	0.0321112	47.7394	40.5954
chr14	75237789	75238640	1.47889	5.27345	1.40543e-06	64.5744	23.1671	0.23215	5.87994	0.0240636	63.8237	54.3372
chr7	130645721	130647239	1.00741	5.52083	0.000139862	65.0976	32.3822	0.23215	5.87994	0.0240636	63.8237	54.3372
chr9	109038153	109039328	1.54284	5.23989	7.34656e-07	64.5038	22.1382	0.23215	5.87994	0.0240636	63.8237	54.3372
chr1	52800287	52800913	1.06246	4.79809	0.00121195	40.2056	19.2511	0.23107	5.21313	0.0363489	40.1873	34.2397
chr3	108294452	108294851	1.31311	4.66658	0.000288998	40.0335	16.1115	0.23107	5.21313	0.0363489	40.1873	34.2397
chr2	26663001	26663999	1.3262	5.26178	1.15615e-05	60.7528	24.2293	0.23054	5.79248	0.0263064	60.0357	51.1695
chr13	95973259	95973933	1.07689	4.6427	0.0017935	36.2811	17.199	0.22962	5.07169	0.0403973	36.416	31.0578
chr16	23224543	23225755	1.4724	4.43518	0.000233233	36.0364	12.9869	0.22962	5.07169	0.0403973	36.416	31.0578
chr16	44701568	44702721	1.86791	4.22766	2.89642e-05	35.7933	9.80631	0.22962	5.07169	0.0403973	36.416	31.0578
chr2	11187067	11187559	1.4724	4.43518	0.000233233	36.0364	12.9869	0.22962	5.07169	0.0403973	36.416	31.0578
chr6	146120139	146121009	1.16562	4.59615	0.00115055	36.2261	16.1486	0.22962	5.07169	0.0403973	36.416	31.0578
chr19	47133012	47133525	1.91121	4.85712	1.93703e-07	56.2089	14.9443	0.22882	5.69937	0.0287653	56.25	48
chr1	88586866	88587955	1.00216	4.51809	0.00400542	32.4279	16.1898	0.22815	4.91486	0.0415737	32.6483	27.8728
chr15	82956578	82957267	2.04995	3.96832	3.49722e-05	31.8516	7.69192	0.22815	4.91486	0.0415737	32.6483	27.8728
chr5	96897956	96898643	1.00216	4.51809	0.00400542	32.4279	16.1898	0.22815	4.91486	0.0415737	32.6483	27.8728
chr1	23402196	23403040	-1.65261	4.15871	0.000167284	10.0729	31.6693	0.22763	3.22972	0.0880985	10.1509	8.6692
[truncated: 4,066 more rows]
