# Supplementary material for: Regeneration alters open chromatin andcis-regulatory landscape of erythroid precursors
Source: HighWire-hosted journal article supplement (doi:10.1101/gr.279949.124), 2025-06-02
Supplement: Supplemental_Table_S7.xlsx [file Supplemental_Table_S7.xlsx]

## Sheet: README
Supplemental Table 7: List of Significant peaks that are changing in anemia and associated with Red Blood Cell traits in human GWAS datasets.

## Sheet: Matrix_618_sigpeaks_associated_
	Day0_1	Day0_2	Day0_3	Day1_1	Day1_2	Day1_3	Day3_1	Day3_2	Day3_3	Day7_1	Day7_2	Day7_3	Day14_1	Day14_2	Day14_3	Day21_1	Day21_2	Day21_3	Day35_1	Day35_2	Day35_3
ID_chr9_40800359_40801933	9.68721	9.86216	9.66687	9.5419	9.56676	9.5144	9.59509	9.77985	9.69698	9.79938	9.74431	9.61956	9.96941	9.96309	9.91313	9.79923	9.87615	9.78462	9.76482	9.80837	9.65218
ID_chr17_25919200_25920703	9.5508	9.75467	9.57935	9.52374	9.47234	9.68811	9.71021	9.6522	9.55756	9.66698	9.7454	9.75378	9.87195	9.87374	9.87804	9.63068	9.87691	9.62292	9.64887	9.76213	9.57394
ID_chr13_23738654_23740181	9.31672	9.53744	9.31253	9.41732	9.48682	9.51176	9.55115	9.62419	9.74836	9.52608	9.54648	9.53691	9.30139	9.21497	9.41007	9.40061	9.39765	9.15966	9.43556	9.5122	9.38562
ID_chr6_67035939_67037752	9.37257	9.52448	9.33186	9.37275	9.40729	9.44019	9.62547	9.58285	9.71538	9.58282	9.59977	9.85105	9.29787	9.3054	9.44389	9.4118	9.47478	9.37342	9.56749	9.48793	9.44474
ID_chr2_72978477_72981105	9.25329	9.54703	9.24616	9.3536	9.31935	9.47428	9.60214	9.56919	9.51331	9.52843	9.55752	9.64106	9.61198	9.67652	9.47742	9.50482	9.58714	9.5589	9.53021	9.52885	9.39954
ID_chr10_80147749_80150354	9.26858	9.3866	9.23896	9.30668	9.35552	9.31552	9.40946	9.54809	9.4328	9.39362	9.43292	9.50573	9.56718	9.59046	9.5333	9.4045	9.55882	9.55335	9.44217	9.44187	9.3731
ID_chr17_45572370_45574808	9.21629	9.4246	9.273	9.23163	9.32416	9.24578	9.26025	9.48154	9.45586	9.39181	9.36673	9.20302	9.61127	9.62376	9.52122	9.45376	9.62486	9.43394	9.49384	9.5058	9.43269
ID_chr13_23554887_23556610	8.72706	9.01879	8.92177	9.21503	9.17596	9.23789	9.22254	9.28588	9.45436	9.18075	9.22844	9.29139	8.86441	8.83521	8.96809	9.05288	8.99807	8.8135	9.1608	8.97635	8.81385
ID_chr16_32508719_32510184	8.9936	9.2099	8.9555	9.18074	9.20203	9.30928	9.27509	9.37899	9.45455	9.37866	9.37768	9.5205	8.79181	8.80031	8.47383	9.02995	9.10933	8.88786	9.20505	9.06639	9.07129
ID_chr14_62759699_62761901	9.0891	9.28266	8.96528	9.17956	9.03543	9.19269	9.26564	9.24669	9.30132	9.29906	9.31566	9.47473	9.33137	9.40675	9.35544	9.14987	9.27848	9.30564	9.32534	9.22976	9.05946
ID_chr10_79853231_79855345	9.26518	9.46742	9.2619	9.14357	9.29098	9.36169	9.31395	9.50634	9.36397	9.38109	9.50374	9.27064	9.57507	9.58956	9.58596	9.44264	9.46279	9.44796	9.45712	9.47899	9.35826
ID_chr7_63938337_63939994	9.15434	9.2255	9.09753	9.12924	9.16337	9.17265	9.32018	9.30186	9.27823	9.34513	9.36462	9.39366	9.53874	9.47444	9.6354	9.28841	9.38199	9.39994	9.35533	9.33712	9.24962
ID_chr10_80577191_80579252	9.12635	9.20752	9.05861	9.11904	9.20304	9.19442	9.37427	9.34281	9.29721	9.30939	9.33225	9.37835	9.55024	9.57693	9.41424	9.31367	9.38863	9.39625	9.33508	9.32794	9.21216
ID_chr11_109610908_109612299	9.24233	9.31896	9.09544	9.11792	9.18098	9.15335	9.40922	9.28602	9.30776	9.47762	9.46402	9.4707	9.71345	9.71363	9.63159	9.36321	9.53855	9.49299	9.39175	9.36113	9.30564
ID_chr8_70839113_70840169	9.1472	9.25262	9.15409	9.10658	9.11153	9.10564	9.23033	9.28532	9.17891	9.36415	9.30803	9.34186	9.51083	9.47739	9.39255	9.35085	9.47037	9.28671	9.39429	9.25638	9.24409
ID_chr7_143004632_143006759	9.00406	8.95179	8.93831	9.05773	9.04482	9.06405	9.03685	9.06135	9.12584	8.97688	9.02393	9.07845	8.79063	8.85752	8.6922	8.96387	9.06749	8.82505	8.9361	8.98622	8.89574
ID_chr12_71015093_71017016	9.17385	9.34888	9.17644	9.03418	9.03142	9.15267	9.26254	9.30804	9.07174	9.27363	9.35081	9.24014	9.45768	9.30172	9.34435	9.30336	9.37555	9.21693	9.40707	9.47687	9.24044
ID_chr11_23255117_23256462	9.04371	9.28963	9.11125	9.0329	9.04382	9.17726	9.0707	9.26368	9.09834	9.09072	9.19668	9.22414	9.49069	9.48281	9.45558	9.27275	9.4179	9.27628	9.33851	9.4244	9.27586
ID_chr8_72160571_72161770	9.14502	9.31653	9.0805	9.02135	8.99665	9.15493	9.24707	9.24145	9.14068	9.12325	9.14325	9.14796	9.43849	9.41852	9.39829	9.23623	9.27165	9.0717	9.17252	9.27727	9.26055
ID_chr5_137785757_137787923	9.00333	9.21771	8.78206	8.93239	9.13533	9.04524	9.19263	9.27919	9.15849	9.27193	9.27943	9.23067	9.32671	9.4315	9.16559	9.28428	9.2102	9.09955	9.2274	9.18883	9.13335
ID_chr12_83072181_83074010	8.70938	8.85178	8.77428	8.90052	8.88512	8.85875	9.01082	9.10199	9.16989	9.02351	9.01444	9.16336	8.36745	8.56319	8.43684	8.67399	8.78443	8.4838	9.0216	8.87957	8.69877
ID_chr9_44334295_44335997	8.64463	8.97654	8.70459	8.86399	8.91706	8.89493	8.92252	9.10287	9.19892	9.01554	9.08624	9.27041	8.80123	8.76651	8.86161	8.88977	8.8378	8.83804	8.87794	8.9872	8.88379
ID_chr7_45052979_45054664	8.95558	8.97905	8.94235	8.84631	8.90425	9.01423	8.98995	9.07682	8.9895	8.96447	8.96926	8.94353	9.17759	9.25846	9.16881	8.99618	9.04051	8.95216	9.01098	8.97451	8.91027
ID_chr5_64802742_64804075	8.75241	8.94414	8.73808	8.83739	8.92348	8.82039	9.00042	9.02987	9.11731	9.03119	9.05366	9.31505	8.93655	9.01165	9.01546	8.9053	9.09592	9.06206	8.95573	8.87018	8.9094
ID_chr8_106058702_106060319	8.89256	9.0401	8.8252	8.82077	8.83986	8.96217	8.98735	9.07266	9.01499	8.94024	8.98792	9.00652	9.17338	9.11323	9.14219	9.02111	8.95136	9.11136	8.93951	9.00951	8.9161
ID_chr14_16364499_16366463	8.67587	8.81667	8.60261	8.79877	8.66049	8.82774	8.95826	8.97565	8.96973	8.90583	8.76996	8.9029	8.80296	8.77495	8.77553	8.74434	8.74137	8.83279	8.9574	8.81681	8.81184
ID_chr13_21779135_21780776	8.6398	8.82043	8.68309	8.79329	8.93352	8.89189	8.83702	8.95582	9.08007	8.87253	8.91636	8.87	8.57877	8.60402	8.58254	8.74217	8.67784	8.58435	8.71651	8.82832	8.59361
ID_chr11_69757872_69759657	8.8769	8.97597	8.89587	8.79125	8.86349	9.00755	8.95132	9.01699	9.00585	9.13419	9.04346	9.11789	9.25646	9.24777	9.10349	9.10247	9.24549	9.07621	9.12177	9.08688	9.0179
ID_chr3_152209201_152211354	8.55762	8.98627	8.6259	8.74118	8.70988	8.77987	8.87537	9.00724	8.77733	8.8724	8.85533	8.77112	9.04989	9.02537	9.10122	8.95231	8.96617	8.97895	8.93185	9.00659	8.87303
ID_chr11_101626735_101628580	8.5245	8.75633	8.60018	8.70803	8.77325	8.85052	8.86954	8.92694	8.93594	8.76715	8.72906	8.91273	8.52359	8.51587	8.64249	8.65531	8.76718	8.60357	8.74081	8.67341	8.52824
ID_chr10_43578310_43580236	8.44336	8.7185	8.48488	8.68772	8.74194	8.64317	8.85215	8.85659	8.97157	8.81936	8.78001	9.00895	8.28618	8.36266	8.55243	8.41768	8.40373	8.47199	8.47588	8.5647	8.4649
ID_chr9_107587126_107588193	8.76802	8.8424	8.86001	8.68611	8.7556	8.82979	8.90321	8.94164	8.82454	8.95911	9.01574	8.96919	8.98149	8.96975	8.97064	8.9752	9.06359	8.90806	9.0019	9.06786	8.89375
ID_chr10_80538756_80540577	8.53346	8.63381	8.54093	8.64939	8.78427	8.82321	9.02852	8.74844	8.95922	8.66828	8.89685	8.91698	8.54643	8.62376	8.56024	8.56865	8.63515	8.58517	8.54014	8.55013	8.62568
ID_chr8_80499923_80501671	8.3575	8.60822	8.42344	8.64075	8.63111	8.65506	8.88662	8.65297	9.01751	8.97997	9.00259	9.24447	7.86227	8.09091	7.92288	8.30833	8.23077	8.25698	8.66305	8.54434	8.51114
ID_chr17_46030477_46033019	8.35462	8.39	8.23107	8.62518	8.61982	8.55281	8.56355	8.67082	8.69087	8.26184	8.22803	8.29129	8.37487	8.333	8.3969	8.39506	8.40636	8.44268	8.21498	8.39871	8.35116
ID_chr1_74505438_74506871	8.51631	8.67283	8.54243	8.61522	8.58489	8.64859	8.67217	8.766	8.68416	8.80499	8.7982	8.89178	8.76587	8.83027	8.72268	8.66627	8.74545	8.67759	8.79817	8.64987	8.78574
ID_chr13_23761022_23762018	8.45631	8.66166	8.40462	8.60825	8.61404	8.70092	8.79688	8.80119	8.81311	8.65463	8.74919	8.727	8.60203	8.65742	8.63458	8.51147	8.48144	8.39918	8.5742	8.67483	8.53988
ID_chr8_122719202_122721317	8.34448	8.45265	8.32879	8.58995	8.66342	8.53958	8.53204	8.72716	8.83006	8.67358	8.6933	8.7867	8.2007	8.28878	8.01892	8.39378	8.5338	8.38374	8.51684	8.41635	8.41329
ID_chr4_133872588_133874549	8.19901	8.50147	8.31289	8.57981	8.59948	8.67487	8.92968	8.74463	9.00931	8.79656	8.79143	8.94701	8.06361	8.21484	7.93871	8.38041	8.22755	8.27	8.57726	8.4255	8.33369
ID_chr11_23305673_23307498	8.59285	8.86805	8.61942	8.57723	8.7594	8.70716	8.79296	8.89502	8.80773	8.86289	8.88319	8.81248	9.06873	9.09376	9.06284	8.77273	9.07334	8.86332	8.81521	8.9248	8.86378
ID_chr12_77237851_77239999	8.56299	8.72153	8.57512	8.5601	8.56729	8.67093	8.79301	8.7868	8.84853	8.82501	8.6905	8.90866	8.62185	8.63397	8.68752	8.58334	8.69286	8.59084	8.70067	8.4911	8.56706
ID_chr2_131159342_131161045	8.39656	8.71718	8.43627	8.55923	8.64348	8.67578	8.69071	8.69829	8.84767	8.71132	8.72813	8.77113	8.46635	8.39115	8.40353	8.60074	8.54532	8.54216	8.65184	8.55443	8.58548
ID_chr3_14886114_14887080	8.40977	8.70096	8.48692	8.53062	8.39396	8.31003	8.45076	8.46509	8.8086	8.73834	8.92763	8.78118	8.26527	8.36285	8.38122	8.5339	8.51584	8.55841	8.77395	8.59742	8.48893
ID_chr5_103752438_103754595	8.35186	8.5867	8.43641	8.52796	8.69103	8.64982	8.80208	8.71743	8.79633	8.60561	8.66493	8.80002	8.54026	8.6499	8.52511	8.54667	8.61271	8.60194	8.6239	8.62651	8.57787
ID_chr11_84869575_84871364	8.51009	8.79235	8.51811	8.52746	8.58345	8.56213	8.69805	8.75741	8.80811	8.72824	8.66995	8.80841	8.82595	8.79368	8.90159	8.72776	8.87841	8.7308	8.69987	8.75204	8.71937
ID_chr11_86484021_86485312	8.57537	8.73744	8.57074	8.51159	8.54506	8.64225	8.68727	8.83246	8.79182	8.70986	8.76564	8.7498	8.92305	8.92808	8.80474	8.67751	8.82165	8.71474	8.68762	8.74287	8.5355
ID_chr9_64810820_64812186	8.53161	8.577	8.51091	8.49051	8.41766	8.46713	8.60352	8.55881	8.67001	8.6307	8.66276	8.73451	9.08726	9.08506	8.97151	8.73109	8.91008	8.80929	8.70417	8.72378	8.59868
ID_chr10_62326650_62328111	8.31528	8.43664	8.27829	8.48406	8.45162	8.54277	8.59027	8.50123	8.54931	8.39179	8.41425	8.53206	8.04737	8.11459	8.14963	8.24671	8.41636	8.12755	8.45216	8.33072	8.28622
ID_chr4_148038424_148039807	8.49016	8.60589	8.27171	8.47328	8.51874	8.63469	8.66893	8.80126	8.70945	8.70636	8.70149	8.84874	8.65134	8.77712	8.67079	8.5431	8.56562	8.72338	8.66389	8.72231	8.54557
ID_chr6_108659092_108661076	8.32595	8.40347	8.38106	8.47084	8.45711	8.41171	8.39758	8.44127	8.54488	8.0957	8.0328	7.97778	8.66098	8.56957	8.55268	8.35765	8.54477	8.39157	8.31194	8.39862	8.22744
ID_chr7_19749063_19750537	8.39929	8.39033	8.33721	8.43255	8.26633	8.39702	8.39201	8.58208	8.42709	8.52524	8.54967	8.65433	8.7698	8.83675	8.71676	8.46893	8.64454	8.50126	8.47869	8.39254	8.45467
ID_chr5_25497731_25500053	8.55086	8.54188	8.36694	8.4308	8.42745	8.6198	8.66949	8.69212	8.74752	8.83078	8.6894	8.73511	9.05444	8.97588	8.93342	8.77561	8.72219	8.76142	8.71355	8.67241	8.63018
ID_chr5_140606876_140608706	7.99602	8.23627	8.22912	8.42989	8.42153	8.51925	8.62779	8.51598	8.62184	8.46115	8.44706	8.53404	7.90129	8.13001	8.15347	8.12702	8.18355	7.81009	8.17053	8.19021	8.18554
ID_chr4_154023618_154024586	8.11736	8.39491	8.09043	8.42402	8.36825	8.34772	8.57239	8.41485	8.77349	8.60405	8.56041	8.66651	7.50697	7.94627	7.63001	8.10585	8.20724	8.08591	8.11619	8.18409	8.11322
ID_chr12_84203228_84204413	8.14363	8.27451	8.073	8.42345	8.30222	8.12498	8.37916	8.37705	8.53438	8.43261	8.50615	8.57101	7.66602	7.71477	7.62832	8.0707	8.12928	7.9719	8.2998	8.18213	8.26618
ID_chr5_137569650_137571732	8.21652	8.32791	8.25006	8.40791	8.54208	8.46539	8.64182	8.58703	8.71479	8.50133	8.47351	8.67406	8.07555	8.17881	7.92053	8.26509	8.39785	8.28319	8.27974	8.30481	8.36711
ID_chr11_116531821_116533736	8.19396	8.33928	8.11006	8.40346	8.55565	8.54077	8.4589	8.54838	8.69088	8.58136	8.6105	8.69346	7.71166	8.04958	7.69994	8.2869	8.1384	8.36796	8.29153	8.28874	8.44102
ID_chr10_61451400_61453168	8.45141	8.50921	8.47563	8.38764	8.47581	8.54383	8.67531	8.59127	8.51508	8.59848	8.53624	8.5447	8.76513	8.73744	8.7031	8.4806	8.53189	8.47856	8.61887	8.52541	8.52371
ID_chr11_24129101_24130641	7.55403	7.90167	7.62593	8.38686	8.29544	8.31696	8.44008	8.35044	8.55878	8.06431	8.07196	8.30149	7.05166	7.23822	7.1317	7.46932	7.5457	7.44184	7.74634	7.76571	7.75143
ID_chr8_105288978_105290582	8.39544	8.51306	8.37039	8.38434	8.42441	8.45738	8.40946	8.5116	8.39674	8.4028	8.45516	8.44647	8.83405	8.78869	8.70371	8.527	8.49425	8.4219	8.37417	8.47347	8.40013
ID_chr12_76709204_76711002	8.10163	8.21618	8.11301	8.37935	8.45684	8.56692	8.63721	8.62011	8.7785	8.54982	8.62056	8.80179	7.77464	7.9766	7.75818	8.28381	8.20568	8.29056	8.21837	8.23862	8.36678
ID_chr3_100488177_100490142	8.23624	8.47711	8.38514	8.37469	8.41917	8.41561	8.51982	8.60109	8.67864	8.61512	8.67728	8.75426	8.48873	8.49788	8.45068	8.49138	8.57481	8.38822	8.47205	8.44166	8.30203
ID_chr2_28616407_28618189	7.9321	8.16287	7.91903	8.32456	8.34594	8.21993	8.64483	8.43861	8.72019	8.39642	8.53014	8.657	7.35022	7.65893	7.53495	7.95458	7.79317	7.51706	8.15951	8.05747	8.057
ID_chr17_26507884_26509328	8.10381	8.44387	8.05018	8.30408	8.25384	8.39666	8.50234	8.44856	8.63438	8.41582	8.56879	8.68451	8.6152	8.69611	8.75267	8.32616	8.58714	8.58477	8.5172	8.34467	8.39102
ID_chr13_44729977_44731435	8.44885	8.63952	8.53396	8.3033	8.38685	8.50175	8.59573	8.49861	8.6352	8.67087	8.66099	8.57992	8.83089	8.87849	8.65649	8.66064	8.75534	8.74195	8.65635	8.62516	8.52282
ID_chr1_132367555_132368497	8.36206	8.33371	8.28688	8.30125	8.29915	8.27494	8.45349	8.42553	8.61644	8.52884	8.49463	8.68526	8.12435	8.15828	8.05863	8.35179	8.53878	8.11188	8.30592	8.29142	8.29143
ID_chr10_80589792_80590844	8.4221	8.39106	8.29837	8.28198	8.20926	8.3484	8.59299	8.47188	8.51774	8.53735	8.5144	8.44391	8.65093	8.73912	8.44085	8.43994	8.47553	8.27442	8.46949	8.37976	8.30917
ID_chr15_76251841_76253235	7.98305	8.13717	7.86675	8.28105	8.17664	8.23792	8.51666	8.34316	8.62289	8.48325	8.58235	8.53661	7.49787	7.78913	7.42971	7.93987	7.97271	7.70173	8.1413	7.88335	8.12855
ID_chr16_30308433_30311184	8.20974	7.97493	8.14963	8.28089	8.22766	8.2556	8.22875	8.34908	8.39804	8.08988	8.20734	8.0078	7.84865	7.97548	7.78876	8.10662	8.2005	7.95133	8.17458	8.19051	8.02411
ID_chr12_110973808_110975021	8.19558	8.4858	8.03934	8.26848	8.34301	8.21931	8.61239	8.43363	8.56944	8.55002	8.4497	8.59942	8.00315	8.09458	7.79157	8.3064	8.31619	8.24895	8.35222	8.17409	8.47391
ID_chr8_122711480_122713059	8.29527	8.33059	8.31076	8.24336	8.20873	8.10572	8.52607	8.25237	8.47726	8.45909	8.46934	8.58338	7.92981	8.1163	7.86151	8.21266	8.32755	8.08155	8.16614	8.13685	8.3203
ID_chr1_133753839_133755091	8.00921	8.27529	8.02382	8.23929	8.33533	8.29953	8.58743	8.30956	8.5403	8.31564	8.40258	8.41758	7.47391	7.70362	7.68706	8.12681	8.06694	7.83335	8.09011	8.09053	8.07186
ID_chr8_23053393_23054828	7.72637	8.01948	7.76636	8.23867	8.28135	8.32622	8.49264	8.48967	8.61391	8.23754	8.3428	8.47304	7.24415	7.49858	7.46388	7.73018	7.66751	7.55729	7.9446	7.86697	7.97814
ID_chr11_58008158_58010803	8.28054	8.34576	8.21495	8.21085	8.1525	8.20084	8.32147	8.33908	8.32838	8.41909	8.32526	8.31063	8.64392	8.60417	8.44941	8.42209	8.58745	8.40897	8.37788	8.4442	8.3414
ID_chr6_115675242_115677088	8.13044	8.33235	8.23611	8.20861	8.3281	8.30843	8.32287	8.50511	8.53673	8.41813	8.43899	8.71128	8.58074	8.51188	8.47737	8.41815	8.56225	8.35551	8.42346	8.33326	8.2313
ID_chr8_84900937_84902249	8.0356	8.14322	8.1358	8.20406	8.2331	8.39777	8.39579	8.38562	8.58241	8.34262	8.31461	8.56089	7.64382	7.76534	7.70429	8.06342	8.13737	8.09496	8.19601	8.12466	8.15052
ID_chr7_27166146_27167650	8.33158	8.37223	8.21348	8.1879	8.20006	8.24066	8.3444	8.49019	8.52648	8.46298	8.38543	8.42172	8.52913	8.56354	8.60088	8.39794	8.39128	8.36984	8.39025	8.49164	8.37487
ID_chr12_57229781_57231661	8.3454	8.47479	8.14065	8.18707	8.13377	8.14392	8.49732	8.3892	8.45323	8.4584	8.55243	8.41675	8.44526	8.43712	8.4608	8.40794	8.42744	8.31906	8.34464	8.38937	8.33759
ID_chr6_60827832_60829458	7.93347	8.03227	7.97366	8.18359	8.09359	8.23445	8.16429	8.21618	8.48039	8.281	8.35201	8.36301	7.59962	7.70631	7.81161	7.99191	8.00556	7.92533	8.15446	7.89662	7.96498
ID_chr17_25941520_25943540	7.85804	8.12673	7.83899	8.17654	8.15534	8.23515	8.30383	8.45868	8.3926	8.22355	8.2519	8.30108	7.65418	7.88199	7.78553	7.90477	7.88518	7.8701	8.20491	7.93437	7.99732
ID_chr16_32078122_32079719	8.12969	8.11084	7.89546	8.17123	8.15976	8.15423	8.33448	8.26928	8.27414	8.32631	8.36774	8.47708	8.12101	8.14256	8.21485	8.12668	8.13362	8.05442	8.18584	8.16717	8.05111
ID_chr4_151044136_151045135	8.18363	8.25039	8.02055	8.1605	7.97375	8.00557	8.23526	8.15957	8.25734	8.20616	8.24162	8.2757	8.42952	8.39431	8.46137	8.24641	8.38045	8.2225	8.22405	8.325	8.22135
ID_chr5_150673288_150674740	8.1425	8.29499	8.02131	8.1586	8.19466	8.13964	8.43332	8.43558	8.4568	8.46295	8.49187	8.60663	8.47691	8.55059	8.4621	8.38685	8.48724	8.27791	8.34054	8.32754	8.16144
ID_chr2_165888315_165889408	7.95098	7.92391	7.95573	8.14941	8.14434	8.06052	8.10225	8.1602	8.32532	8.12085	8.18902	8.41574	7.73948	7.91452	7.79521	7.97525	8.01186	7.76531	7.99464	8.04585	7.8751
ID_chr19_29251148_29252321	8.13373	8.1925	7.97324	8.12381	8.11138	8.20817	8.23473	8.2906	8.33459	8.38251	8.37477	8.39369	8.4805	8.32881	8.3349	8.26931	8.28846	8.23225	8.21175	8.28157	8.14771
ID_chr12_83631689_83633136	8.12986	8.25447	8.20127	8.12202	8.14827	8.22318	8.06099	8.23458	8.25543	8.30167	8.32147	8.17106	8.79045	8.69124	8.53315	8.45763	8.52635	8.4769	8.43182	8.37442	8.23596
ID_chr7_24376783_24377649	7.92183	8.11632	7.93117	8.11398	8.16061	8.12148	8.28704	8.31499	8.42289	8.1986	8.27393	8.41584	7.86159	7.92747	7.47471	8.13941	8.10348	8.01118	8.18973	8.05895	7.97652
ID_chr16_17146660_17148465	7.74097	7.80518	7.79854	8.09328	8.18434	8.16231	8.3149	8.40709	8.29501	7.88	7.9265	7.89942	7.90906	7.98938	7.96504	7.77523	7.82626	7.68881	7.84049	7.88792	7.9295
ID_chr2_164879209_164880541	7.93879	8.2665	7.88026	8.07785	7.99912	8.12687	8.13155	8.33164	8.20866	8.40303	8.26018	8.2582	8.39514	8.61438	8.45532	8.28318	8.44058	8.36305	8.35681	8.34131	8.26113
ID_chr11_96915983_96917016	8.18852	8.24372	8.06706	8.07114	8.09567	8.17482	8.21283	8.40975	8.39726	8.2117	8.1696	8.34524	8.64682	8.64519	8.45064	8.2073	8.38116	8.22264	8.41343	8.32804	8.18721
ID_chr8_123408969_123410353	7.76097	7.92159	7.81956	8.06937	8.06672	8.01587	7.97256	8.22471	8.20407	7.97859	8.02682	8.25011	7.463	7.60025	7.40371	7.83386	7.73757	7.67979	7.9472	7.78309	7.85211
ID_chr19_10100761_10102297	7.92747	8.14566	7.9318	8.06153	8.23841	8.34169	8.47649	8.40903	8.60827	8.35105	8.50207	8.59878	7.94332	8.13048	7.89576	8.07837	8.0161	8.23064	8.22942	8.25018	8.20515
ID_chr3_100482123_100483510	7.9142	7.91491	7.87405	8.04544	8.1566	8.03873	8.28668	8.15504	8.3675	8.2858	8.34025	8.34368	7.33844	7.64574	7.46491	7.89533	7.99954	7.7281	8.11229	8.10517	8.02512
ID_chr11_78115176_78116454	7.71906	8.04611	7.89342	8.04139	8.00927	8.09361	8.20545	8.1332	8.32438	8.1796	8.17984	8.21742	7.75414	7.76442	7.6922	7.69463	7.89675	7.94205	7.99469	7.953	7.86539
ID_chr4_116220757_116221847	8.10429	8.25814	8.02791	8.03893	8.04656	8.05867	8.19788	8.25229	8.04584	8.19731	8.22382	8.1791	8.41588	8.41997	8.25902	8.16715	8.40683	8.29355	8.35925	8.28569	8.22196
ID_chr12_57196612_57198447	7.99273	7.93633	7.92385	8.03649	8.02842	8.10259	8.14181	8.18683	8.39519	8.2878	8.27243	8.46706	7.2981	7.59544	7.55372	7.91233	8.12773	7.67083	8.18361	7.97687	7.90854
ID_chr10_80159332_80160394	8.03925	8.22201	8.07604	8.03546	8.1218	8.09447	8.1152	8.29201	8.18992	8.21815	8.10183	8.18711	8.42117	8.41569	8.30102	8.16561	8.07416	8.22748	8.06983	8.21252	8.06898
ID_chr1_134077401_134079543	7.80679	7.93412	7.74699	8.03371	7.97642	7.96539	8.0994	7.94403	8.31511	8.36901	8.19557	8.5149	8.36983	8.37607	8.38433	8.02502	8.09552	8.13801	8.12205	8.12806	7.97588
ID_chr4_134923236_134924741	8.20928	8.47197	8.14689	8.03332	8.12218	8.29773	8.27097	8.46846	8.19286	8.39905	8.37078	8.22682	8.59446	8.52925	8.43261	8.5899	8.54722	8.40404	8.42115	8.57707	8.41307
ID_chr9_44319150_44321038	7.7973	8.01149	7.71713	8.02621	8.04968	8.19147	8.06897	8.12313	8.24953	8.03345	8.1783	8.19675	7.84122	7.92508	7.96223	7.85792	7.85423	8.0029	7.99678	7.98022	7.76022
ID_chr5_75460032_75461651	7.88305	7.82623	7.86095	8.01987	7.95273	8.08578	8.19259	8.11461	8.22086	8.09387	8.21938	8.23381	7.57852	7.64604	7.24474	7.90616	7.82292	7.53945	7.90299	8.00422	7.85201
ID_chr5_135168072_135169067	7.97307	8.16767	7.76326	8.0103	7.92503	7.95358	7.94477	8.13576	8.01864	8.09154	8.08964	8.04499	8.31121	8.35806	8.40108	8.11484	8.18175	8.10869	8.14234	8.13131	8.03246
ID_chr11_61956578_61958138	7.93894	8.07406	7.91912	8.00188	8.06166	7.99507	8.13002	8.35586	8.16552	8.30963	8.38812	8.29164	7.92629	8.05295	7.78179	8.06702	8.20574	7.91043	8.1081	8.20964	8.06305
ID_chr16_91055708_91057646	7.39585	7.46557	7.45109	7.97439	7.97091	7.85369	8.04984	7.94855	8.24624	7.45586	7.29474	7.16322	7.17687	7.10181	7.09204	7.29626	7.29364	7.29342	7.28596	7.37602	7.37868
ID_chr9_108490117_108491671	7.86908	7.89855	7.69926	7.97355	7.96599	8.00897	8.18111	7.99072	7.89196	7.96243	7.94358	8.23415	7.70167	7.63033	7.50551	7.72289	7.64244	7.80944	7.89098	7.91758	8.02607
ID_chr19_5071839_5073427	7.75982	7.76402	7.77326	7.96085	7.9781	7.94856	8.07422	8.0922	8.22783	7.86578	7.98557	7.88623	7.66027	7.8782	7.43348	7.84677	7.93642	7.6985	7.85619	7.57901	7.85824
ID_chr17_46383195_46384910	7.89202	7.88851	7.68844	7.94868	7.89963	7.98582	7.93043	7.98956	8.09347	8.14754	8.05296	7.87845	8.12377	8.16873	8.2217	7.84469	7.98442	7.98385	7.76724	7.949	7.73508
ID_chr8_80492962_80494583	7.87365	7.86539	7.83306	7.94651	8.01231	8.15803	8.06473	7.97614	8.20144	8.28247	8.35479	8.30794	7.66164	7.85683	7.59545	7.89437	8.07722	7.91142	8.09381	8.03948	7.92441
ID_chr11_95336574_95337729	7.99748	8.28825	8.19898	7.94516	8.10737	8.21283	8.17122	8.03885	8.45905	8.50549	8.39322	8.55271	8.2586	8.3179	8.27955	8.26636	8.28817	8.1468	8.33737	8.28129	8.25159
ID_chr8_105936593_105938595	7.8227	7.95445	8.00463	7.94481	8.07801	8.12143	8.14471	8.16853	8.27522	7.96967	8.02996	8.12824	7.798	7.78908	7.79922	7.81239	8.05151	7.95199	7.77933	7.72817	7.90148
ID_chr11_116533795_116534565	7.91037	7.87785	7.9054	7.94	7.94192	7.92809	8.21606	8.15371	8.25836	8.05362	8.06909	8.19105	7.64646	7.68626	7.70756	7.86678	8.11433	7.81211	8.01483	7.98459	7.9555
ID_chr3_88492418_88493455	7.53266	7.7143	7.56568	7.93925	7.8063	7.99242	7.91486	8.06464	7.98619	7.94353	7.89294	7.91063	7.64754	7.74813	7.72758	7.72615	7.71864	7.70879	7.71673	7.68777	7.76947
ID_chr17_47597902_47598788	7.5331	7.76471	7.22606	7.93057	7.73368	7.83038	7.94963	7.887	7.94626	7.75734	7.60443	7.58619	7.5593	7.66833	7.37641	7.65965	7.51268	7.42817	7.68911	7.67826	7.52463
ID_chr10_128302869_128304474	7.9341	8.19769	7.98119	7.92903	7.97702	7.80873	8.09999	8.17782	8.11146	8.14908	7.97406	8.12817	8.36292	8.30442	8.19603	8.26342	8.27388	8.13277	8.25128	8.27661	8.04893
ID_chr15_76671183_76671951	7.86578	7.90973	7.75709	7.92259	8.07997	8.03165	8.16021	8.12659	8.22999	8.08158	8.24792	8.25716	7.84539	7.96045	7.94704	7.80693	7.94259	7.71859	8.08885	8.0294	7.86227
ID_chr10_80754857_80755636	7.95504	8.15471	7.89448	7.92179	7.91995	8.02212	8.10313	8.02697	8.02813	8.05423	8.00889	8.04409	8.26561	8.4166	8.27762	8.01538	8.23875	8.23732	8.01533	8.09427	8.11499
ID_chr17_10317838_10320501	7.96764	8.20054	7.84249	7.91903	8.04956	8.0103	8.27863	8.19249	8.33248	8.18406	8.13913	8.06146	8.38391	8.41489	8.3596	8.19319	8.26072	8.33619	8.14036	8.21167	8.07802
ID_chr2_72475518_72477206	7.71542	7.86411	7.5997	7.90722	7.96973	7.73495	7.81914	7.99469	8.09084	7.95559	7.91894	7.91076	7.43996	7.73222	7.41911	7.67045	7.8662	7.7776	7.90485	7.61868	7.81685
ID_chr1_91373021_91374460	6.86156	6.9919	6.38469	7.90288	8.00622	7.71903	8.0575	7.94739	8.09546	7.01214	7.219	6.60096	6.07466	6.4447	6.16379	6.65066	6.65086	6.48134	6.91224	6.92779	6.80957
ID_chr11_31843436_31844539	7.65516	7.39756	7.46953	7.89982	7.84922	7.94688	8.06262	7.80961	8.11684	7.71703	7.69991	7.64121	7.13482	7.37046	6.8769	7.48276	7.57268	7.09762	7.62841	7.4396	7.60801
ID_chr11_95413683_95415069	8.12337	8.2267	7.97442	7.88741	7.9724	7.92386	8.17752	8.06527	7.99797	8.3029	8.09586	8.16506	8.61146	8.57771	8.43562	8.26677	8.42151	8.17359	8.12996	8.18873	8.12917
ID_chr11_113683161_113684965	7.80475	8.09531	7.94108	7.8845	7.9251	8.00744	7.88663	8.07573	8.04189	8.16007	8.06604	8.09211	8.16184	8.25942	8.3631	8.0057	8.10435	8.16809	8.20906	8.11823	8.08287
ID_chr15_62158141_62159697	7.26289	7.286	7.20855	7.82287	7.79211	7.96756	7.8693	7.86896	8.04986	7.60411	7.59857	7.80067	6.58972	6.83857	6.67119	7.07276	7.15865	6.84191	7.16674	6.99988	7.2245
ID_chr13_23550918_23551943	7.31641	7.64073	7.43963	7.82233	7.76134	7.89423	7.99679	8.06299	7.88781	7.80002	7.81259	7.77337	7.48047	7.55046	7.6133	7.55037	7.70792	7.68995	7.79356	7.6694	7.55564
ID_chr8_105900171_105901736	7.75174	7.80774	7.65793	7.82091	7.92125	7.82866	8.01361	8.07499	8.11034	7.8957	8.09871	8.02268	7.75013	7.80371	7.82899	7.94709	7.70717	7.94548	7.96918	8.01573	7.92141
ID_chr2_173037819_173038641	7.74507	7.89309	7.78219	7.81618	7.85859	7.89663	8.04574	8.12902	8.18836	8.26018	8.24872	8.34918	7.61709	7.72108	7.51588	7.87739	8.01787	7.63868	8.00771	8.04472	7.81383
ID_chr8_26014921_26015997	7.88901	7.92564	7.7915	7.81271	7.88044	7.97832	8.05173	8.10747	8.15514	8.10362	8.1102	8.32324	8.12951	8.10258	8.21165	7.93685	8.21224	7.98005	7.9771	8.11671	8.00683
ID_chr9_59616685_59617992	7.88058	8.05812	7.81288	7.81085	7.88124	7.76554	7.98473	7.92332	7.96859	7.99852	8.06749	7.85199	8.19239	8.15084	8.26104	7.9748	8.20515	8.00602	7.91516	8.05881	7.72009
ID_chr10_62214961_62217070	7.51347	7.62207	7.69045	7.80158	7.6552	7.73566	8.0482	7.85229	8.09458	8.16506	8.0532	8.31114	7.16341	7.212	7.1243	7.59298	7.67366	7.53865	7.65011	7.62468	7.59625
ID_chr15_75748025_75748717	7.94232	7.94754	7.83009	7.8003	7.88206	7.84309	8.01216	7.91054	7.91205	7.91539	7.84334	7.98185	8.39211	8.33416	8.29744	8.00575	8.17611	8.06715	8.00834	8.10525	7.84078
ID_chr4_138367410_138369201	6.76144	6.9221	6.53769	7.79339	7.77004	7.78787	8.1313	8.13552	8.22461	7.04988	7.19864	7.21687	6.32145	6.44704	6.55186	6.76114	6.77451	6.74277	6.9925	6.80007	7.08445
ID_chr11_107130954_107132412	7.68005	7.87408	7.67423	7.77721	7.76478	7.79354	7.94434	7.97862	7.86701	8.01907	7.87978	7.96653	8.02371	8.08269	7.96368	7.91776	8.19835	7.84696	7.87179	7.74838	7.73898
ID_chr2_78868174_78869671	7.83133	8.1358	7.86302	7.76552	7.68318	7.79722	7.7506	8.01	7.93574	8.13601	8.07742	8.04015	8.50293	8.51951	8.31022	8.26101	8.32249	8.17897	8.17589	8.21722	7.8997
ID_chr13_115089263_115091393	7.58527	7.91906	7.59711	7.75091	7.74387	7.92686	7.85891	8.02671	7.92749	7.99602	7.94947	7.91679	7.68246	7.67998	7.62009	7.75032	7.60409	7.7368	7.74814	7.67879	7.71117
ID_chr5_114978875_114980463	7.4545	7.56986	7.49069	7.7505	7.79822	7.65226	7.78502	7.76108	7.87774	7.62683	7.58105	7.63056	7.36356	7.38688	7.3506	7.54202	7.50879	7.53423	7.60459	7.54477	7.72925
ID_chr13_101693908_101695383	7.62587	7.91478	7.71645	7.72913	7.71585	7.87759	8.01644	8.0497	8.06592	8.04835	7.90875	8.10116	7.61155	7.56197	7.62087	7.72939	7.96523	7.81434	7.79173	7.85025	7.76476
ID_chr5_138193690_138195401	7.52718	7.6767	7.38757	7.70073	7.67119	7.62808	7.66486	7.80386	7.93528	7.59369	7.77001	8.00013	7.40175	7.32575	7.37129	7.55249	7.37638	7.47759	7.43	7.46625	7.50168
ID_chr2_153528718_153530663	7.339	7.69342	7.35842	7.69967	7.79981	7.74272	7.76783	7.72356	8.11882	7.78726	7.60426	7.9166	7.03973	7.36752	7.54103	7.53918	7.48176	7.57902	7.53639	7.55306	7.52052
ID_chr19_43752573_43753681	7.75687	7.76119	7.66142	7.69486	7.58179	7.61193	7.71443	7.70168	7.74381	7.93402	7.8855	7.82957	8.16744	8.19452	7.83876	7.93939	7.89382	7.88331	7.78477	7.90166	7.84554
ID_chr12_4906962_4908075	7.77334	7.74848	7.85192	7.69039	7.62166	7.52404	7.81639	7.73842	7.77634	8.12563	7.98625	8.00204	8.33464	8.25988	8.32056	8.14148	8.07814	8.25158	8.14454	8.21912	7.9567
ID_chr9_64960199_64961465	7.56139	7.78784	7.61409	7.67691	7.75582	7.74619	7.73993	7.73729	7.83071	7.82833	7.65807	7.99667	8.10769	8.01306	8.01664	7.84926	7.86326	7.90895	7.832	7.91053	7.74354
ID_chr11_24135570_24136846	7.45043	7.41134	7.42104	7.67534	7.60647	7.43178	7.61106	7.52402	7.83971	7.65115	7.47956	7.77071	7.24859	7.19161	7.096	7.41781	7.34852	7.13911	7.55099	7.42554	7.32071
ID_chr15_77822296_77823791	7.63204	7.54845	7.45683	7.65149	7.61643	7.67725	7.84288	7.96689	8.03759	7.8662	7.8686	7.7876	7.08786	7.21746	7.11092	7.46184	7.56117	7.25768	7.66773	7.40032	7.51579
ID_chr15_89285035_89286253	7.48937	7.79445	7.49139	7.64306	7.74609	7.80387	8.06895	7.89263	8.20021	7.99193	8.11377	8.14317	6.96549	7.18332	7.23714	7.36813	7.35932	7.1352	7.72767	7.68876	7.63963
ID_chr7_127776424_127778077	7.8778	8.05647	7.69079	7.63651	7.87647	7.93306	7.88239	8.10056	7.90015	8.07509	7.8371	8.05596	8.35108	8.35983	8.20121	8.11589	8.19094	7.88806	8.04401	8.1038	8.20212
ID_chr11_32245179_32246074	7.49584	7.56828	7.43722	7.63612	7.67713	7.56263	7.84425	7.73625	7.96698	7.93093	7.9207	7.99268	7.15869	7.21889	7.03837	7.64182	7.56264	7.42256	7.54612	7.43863	7.58007
ID_chr2_102900233_102901852	7.60391	7.58654	7.69039	7.63514	7.71971	7.64117	7.7943	7.76019	7.73087	7.67783	7.67852	7.94513	7.22361	7.4799	7.35402	7.39063	7.52148	7.55488	7.69697	7.72792	7.44835
ID_chr7_63937147_63938189	7.63395	7.67397	7.62553	7.6346	7.79507	7.61576	7.7377	7.76315	7.78126	7.82628	7.87763	8.09602	8.02463	8.00166	8.00752	7.81129	7.77738	8.01603	7.78123	7.79002	7.68456
ID_chr4_141537718_141539187	7.57793	7.96675	7.50234	7.6325	7.63581	7.71827	7.95508	7.98811	7.82781	7.95416	7.80092	8.08705	8.12972	8.21094	8.11458	7.9406	7.99571	8.03117	7.77978	7.96382	7.73183
ID_chr18_77732280_77733247	7.52418	7.52196	7.48914	7.62995	7.63798	7.71125	7.81931	7.58691	7.97521	7.74526	7.80839	7.87229	7.3723	7.52764	7.29332	7.62639	7.51256	7.32868	7.69744	7.64472	7.58532
ID_chr11_45943766_45945228	7.56371	7.68355	7.64509	7.62392	7.71183	7.66096	7.72531	7.62618	8.0196	7.89464	7.84725	7.79634	8.13665	8.12033	8.09351	7.70176	7.87672	8.02924	7.75431	7.79099	7.75458
ID_chr3_36862639_36863847	7.70141	7.86388	7.63298	7.61652	7.73728	7.6556	7.76156	7.96279	7.91644	7.94066	8.01189	7.84384	8.14003	8.18446	8.16299	7.91202	8.01072	7.96347	7.92362	7.86206	7.91981
ID_chr4_125127260_125128316	7.71271	7.81252	7.58595	7.59671	7.81629	7.72	7.74773	7.65043	7.77643	7.70826	7.76521	7.87854	8.19227	8.14015	8.0821	7.72774	8.05533	7.78328	7.73966	7.96701	7.84532
ID_chr9_54698292_54700115	7.20113	7.54286	7.28032	7.58544	7.43912	7.56079	7.834	7.71257	8.11564	8.05235	8.15631	8.15191	6.82042	7.00912	7.03389	7.3078	7.29472	7.05258	7.61093	7.58525	7.3231
ID_chr11_100713535_100715145	7.27873	7.51436	7.63024	7.5819	7.5423	7.64094	7.84169	7.6939	7.80683	7.71362	7.77791	7.6926	7.41535	7.47273	7.36972	7.41298	7.53248	7.49427	7.48398	7.70325	7.51463
ID_chr9_20975265_20977317	7.53274	7.56376	7.60999	7.55999	7.64419	7.59572	7.71352	7.58136	7.79049	7.35289	7.43465	7.32932	7.48605	7.38747	7.421	7.47739	7.43906	7.41248	7.24624	7.38277	7.50541
ID_chr5_143818439_143819399	7.417	7.2786	7.42738	7.5599	7.37218	7.35385	7.49142	7.60731	7.62395	7.51227	7.55973	7.6234	6.99188	7.2904	7.0264	7.50935	7.28444	7.49455	7.43595	7.37929	7.40602
ID_chr11_4676973_4677751	7.44685	7.63603	7.43274	7.55294	7.53542	7.59587	7.84248	7.61768	7.8262	7.55047	7.67878	7.66789	7.1386	7.09373	6.91266	7.40462	7.296	7.05529	7.36876	7.49687	7.5878
ID_chr7_63955981_63956903	7.38861	7.53037	7.43326	7.55284	7.4588	7.64467	7.76376	7.7014	7.92796	7.77863	7.83787	8.05547	6.99503	7.06032	6.91947	7.43895	7.34549	7.07423	7.56439	7.29585	7.56679
ID_chr9_108569689_108570427	7.33626	7.40199	7.25907	7.55259	7.4973	7.7525	7.66687	7.62578	7.76902	7.47724	7.57533	7.61205	7.32021	7.41028	7.30798	7.40912	7.30663	7.30531	7.39738	7.44079	7.27986
ID_chr11_104292573_104293767	7.31362	7.58518	7.27055	7.54661	7.63526	7.67476	7.68819	7.71169	7.96481	7.80365	7.88879	7.93681	6.54057	6.92975	6.62048	7.35808	7.15494	6.83611	7.34126	7.38492	7.28402
ID_chr13_101692175_101693286	7.362	7.46206	7.42176	7.54655	7.5921	7.74598	7.72583	7.73454	7.78817	7.55785	7.53145	8.07295	7.0226	7.0867	6.87846	7.34985	7.22767	7.24155	7.51975	7.42629	7.39339
ID_chr18_77806037_77807128	6.90586	7.10856	7.16681	7.54647	7.57321	7.70359	7.89269	7.84892	7.81629	7.79961	7.65449	7.97847	6.52057	6.67807	6.46708	7.0178	7.19483	7.05846	7.33032	7.20878	7.1689
ID_chr9_110333080_110334118	7.50318	7.56188	7.49026	7.54631	7.54483	7.58498	7.77995	7.84402	7.75137	7.71924	7.7202	7.83178	7.87072	7.73255	7.89338	7.6342	7.84557	7.79355	7.61241	7.7097	7.64877
ID_chr5_115266362_115267940	7.48837	7.56058	7.38863	7.54487	7.52313	7.39495	7.68443	7.74631	7.92255	7.62297	7.83587	7.76602	7.02036	7.14814	7.05801	7.52347	7.35393	7.14463	7.64151	7.50072	7.25838
ID_chr11_4593421_4595066	7.46107	7.61791	7.55175	7.54141	7.54607	7.58626	7.67548	7.64787	7.78859	7.81258	7.71647	7.80321	7.85427	7.89739	7.91813	7.80899	7.77895	7.85827	7.59486	7.63764	7.65003
ID_chr4_117288391_117290063	7.63099	7.88174	7.66856	7.5351	7.76468	7.72042	7.99241	7.96405	8.06793	7.93686	7.78298	7.92851	7.81735	7.87231	7.82351	7.70978	7.81303	7.75428	7.78921	7.64979	7.53801
ID_chr15_98107533_98109005	7.19196	7.23732	7.22369	7.50581	7.42977	7.46571	7.67709	7.72805	7.8188	7.47974	7.50882	7.65385	7.00582	7.04369	6.79884	7.20514	7.20264	7.35112	7.30759	7.35133	7.16734
ID_chr6_8487100_8488682	7.23329	7.35487	7.29008	7.49465	7.54576	7.23815	7.66441	7.76135	7.92089	7.7578	7.73991	7.74501	6.7612	6.86607	6.61612	7.32406	7.35327	7.08644	7.57343	7.4667	7.28001
ID_chr6_115601462_115602743	7.51604	7.62377	7.55957	7.49331	7.391	7.56148	7.63062	7.49586	7.57137	7.52115	7.61794	7.66927	7.86653	7.87807	7.99125	7.64789	7.6137	7.55653	7.51977	7.63963	7.65913
ID_chr6_56902553_56903418	7.25845	7.35197	7.17918	7.48636	7.45115	7.51885	7.60849	7.49671	7.66568	7.51492	7.43877	7.78582	6.95673	6.88788	6.81508	7.3311	7.31282	7.05284	7.35822	7.42327	7.33706
ID_chr3_89195737_89196957	7.58094	7.46666	7.51764	7.48411	7.48215	7.55858	7.64879	7.59409	7.54039	7.65838	7.58288	7.58624	7.86037	7.95672	7.79296	7.5613	7.60199	7.71565	7.44879	7.6553	7.43946
ID_chr8_122537043_122538417	7.19654	7.25331	7.06131	7.48071	7.58321	7.64314	7.60284	7.68274	7.78267	7.55254	7.7264	7.70991	6.69602	6.88179	6.90954	7.14103	7.24089	6.94301	7.31555	7.18351	7.06477
ID_chr9_44342195_44342847	7.14043	7.27337	7.17589	7.47719	7.28042	7.4677	7.76779	7.60555	7.86054	7.87819	7.72091	8.0201	6.48047	7.02546	6.91975	7.17871	7.10778	7.10475	7.5181	7.25124	7.29134
ID_chr2_173034861_173035980	7.66779	7.67026	7.46173	7.47553	7.70523	7.59211	7.8462	7.7018	8.12592	7.95579	7.9048	8.26831	7.18524	7.42988	7.19864	7.50023	7.6042	7.52957	7.67132	7.74869	7.58062
ID_chr8_106010560_106012667	7.32301	7.72224	7.32416	7.47117	7.64615	7.58117	7.79298	7.77045	7.97681	7.8265	7.92801	8.02146	7.34425	7.38856	7.35245	7.43331	7.56616	7.55346	7.52998	7.56641	7.60373
ID_chr19_47518262_47519818	7.61084	7.56773	7.42275	7.46588	7.72421	7.48529	7.84169	7.75713	7.82562	7.663	7.69949	7.81334	7.12528	7.09874	7.25851	7.43948	7.50114	7.22132	7.49865	7.40907	7.4511
ID_chr11_31831295_31832217	6.91279	7.16068	7.0731	7.4648	7.29364	7.39734	7.5605	7.4775	7.80761	7.50994	7.45152	7.75065	6.37592	6.57514	6.71962	7.04001	6.89024	6.6234	7.27146	7.15388	7.26945
ID_chr12_57194543_57195171	7.30647	7.4033	7.29251	7.46023	7.45039	7.50083	7.6203	7.5466	7.66623	7.48739	7.63963	7.72095	6.89009	7.05406	6.83839	7.27929	7.33922	6.98171	7.55141	7.40674	7.29325
ID_chr19_46961483_46962862	7.71396	7.65382	7.4601	7.45729	7.53477	7.49734	7.65986	7.73558	7.83998	7.82076	7.62359	7.87725	7.93157	8.00902	7.8351	7.84236	7.78421	7.85656	7.74292	7.87192	7.53168
ID_chr13_23763467_23764204	7.25738	7.75232	7.29624	7.44133	7.6161	7.58564	7.75776	7.85286	7.96047	7.80066	7.76442	7.7513	7.22324	7.54336	7.47747	7.45646	7.30547	7.5428	7.55206	7.57567	7.15633
ID_chr8_105278768_105279554	7.21161	7.43136	7.31399	7.44052	7.49295	7.26489	7.57827	7.48534	7.59978	7.4641	7.45417	7.50134	7.10541	7.31212	7.10943	7.26703	7.28898	7.0992	7.25791	7.17007	7.16385
ID_chr9_59655928_59657018	7.00005	7.1048	7.13091	7.43924	7.28666	7.15013	7.0622	7.48719	7.60115	7.25956	7.15985	7.13001	7.67106	7.61739	7.74472	7.17731	7.41478	7.37817	7.15197	7.14453	7.12795
ID_chr9_108450195_108451996	7.14659	7.46599	7.15043	7.40733	7.43753	7.47578	7.8277	7.50913	7.88887	7.86343	7.80325	8.02844	6.54059	6.6431	6.81854	7.17883	7.0696	7.27228	7.52466	7.1928	7.31617
ID_chr19_4200415_4202063	7.20895	7.27111	7.14955	7.38693	7.46847	7.29279	7.66542	7.6298	7.73593	7.35692	7.44594	7.43002	6.78998	7.01179	6.95203	7.17661	7.17817	7.30896	7.32556	7.28542	7.09875
ID_chr8_84838372_84839005	6.81344	6.94745	6.80247	7.38411	7.19852	7.32841	7.43945	7.3747	7.50247	7.48856	7.52181	7.74141	6.40947	6.76359	6.45334	6.91767	6.82497	6.76185	7.28298	6.84486	7.14737
ID_chr11_85643573_85645097	7.42248	7.41868	7.17531	7.37409	7.15262	7.25655	7.5197	7.37626	7.58339	7.50521	7.48079	7.58653	7.28079	7.03222	6.67358	7.35597	7.29129	6.93826	7.20981	7.18757	7.38912
ID_chr17_50508148_50509374	7.03886	7.23061	7.11703	7.37369	7.43427	7.55374	7.2955	7.3491	7.54096	7.31405	7.48517	7.6126	6.9463	7.08961	7.10648	7.25755	7.171	7.26107	7.16967	7.15445	7.0023
ID_chr2_153567969_153569329	7.23336	7.2452	7.18488	7.37206	7.28375	7.21231	7.36367	7.35123	7.59917	7.45418	7.39579	7.42651	6.87358	6.89138	6.78495	7.25996	7.197	6.99977	7.22621	7.11946	7.20225
ID_chr2_45109212_45110545	7.26958	7.46066	7.27444	7.37179	7.52238	7.68327	7.60128	7.64994	7.7127	7.4847	7.64153	7.68193	7.17209	7.35749	7.28722	7.44097	7.34258	7.54362	7.45676	7.65358	7.44281
ID_chr10_62230563_62231968	6.92876	7.04278	7.07486	7.3714	7.36162	7.3989	7.57589	7.50151	7.51235	7.42652	7.33962	7.48057	6.79822	7.12937	6.98802	6.74851	7.18913	6.93974	7.10243	7.14699	6.88894
ID_chr13_23500030_23501185	6.62454	6.69729	6.70786	7.36332	7.42162	7.55606	7.43562	7.61818	7.74036	6.88718	6.92412	7.10562	6.38266	6.49053	6.21539	6.69217	6.55296	6.66085	6.99262	6.72919	6.77267
ID_chr11_117797142_117798691	7.15279	7.27894	7.00808	7.34793	7.47083	7.70001	7.90097	7.62929	7.90389	7.51648	7.52179	7.83109	6.81375	7.07233	6.75794	7.00833	7.08888	7.21266	7.25742	7.1695	7.32637
ID_chr8_84970804_84971365	6.98901	7.33693	7.11344	7.34337	7.37347	7.40296	7.45628	7.42018	7.70673	7.55735	7.40047	7.35332	6.6456	7.03468	6.79047	7.17782	7.24721	7.03007	7.35177	7.15944	7.2585
ID_chr12_83427322_83428332	7.10388	7.20913	7.10623	7.34276	7.28784	7.03217	7.41654	7.40992	7.64127	7.6015	7.60415	7.72417	6.70515	6.98043	6.77187	7.02808	7.27937	6.85626	7.42112	7.35833	7.20647
ID_chr19_46037103_46037787	7.04469	7.17575	7.00956	7.33435	7.21463	7.18413	7.24191	7.23877	7.46496	7.49737	7.30395	7.13952	6.69083	6.93062	6.93023	7.13859	7.2776	6.92819	7.09161	7.09204	6.97452
ID_chr2_152739327_152740348	7.01506	6.98138	7.11916	7.31039	7.24299	7.17318	7.31811	7.45414	7.5893	7.08303	7.07035	6.96028	6.81493	6.82516	7.0088	7.06975	6.88326	6.8897	7.15698	6.98778	6.91044
ID_chr16_87495139_87496529	7.30049	7.6314	7.3525	7.30892	7.37008	7.36575	7.29488	7.58262	7.31638	7.62855	7.46888	7.43627	7.91725	7.88517	7.68412	7.73508	7.85875	7.62511	7.60696	7.67385	7.47974
ID_chr13_23437577_23438826	6.92446	6.9426	7.00891	7.30659	7.29592	7.26024	7.53699	7.47981	7.51336	7.064	7.01871	7.52057	6.62267	6.67502	7.08292	6.89939	6.88652	6.8374	7.20043	7.14568	6.93499
ID_chr2_150909403_150910747	7.2208	7.44168	7.26509	7.30631	7.1818	7.23941	7.38386	7.3635	7.33722	7.45898	7.24593	7.04548	7.77692	7.73952	7.74812	7.59053	7.57399	7.46349	7.53333	7.65642	7.53409
ID_chr11_95808157_95809371	7.00511	7.16397	7.19149	7.30556	7.35144	7.19679	7.55655	7.25617	7.68105	7.29127	7.4489	7.66257	6.78427	6.64315	6.66726	7.20084	7.03173	6.9282	7.39768	7.28794	7.05768
ID_chr11_109586943_109588286	7.22383	7.41627	7.23999	7.30318	7.42183	7.31748	7.30023	7.45658	7.62847	7.4416	7.43806	7.45305	6.87206	6.96176	6.86878	7.15748	7.25589	7.25548	7.45668	7.22692	7.26684
ID_chr13_55412784_55413789	7.51838	7.41166	7.41154	7.29786	7.43734	7.27047	7.22586	7.21705	7.32749	7.20244	7.17315	6.97348	7.63178	7.51767	7.53824	7.52936	7.61835	7.29297	7.27897	7.42643	7.24921
ID_chr5_121236049_121236754	7.2346	7.19428	7.01338	7.29716	7.42727	7.39687	7.44291	7.34772	7.66444	7.3802	7.46112	7.55471	6.83589	6.94862	7.11865	7.21863	7.14563	6.9288	7.41015	7.07206	7.26904
ID_chr17_45594835_45595743	6.58112	7.00266	6.88232	7.28385	6.98264	7.23994	7.3358	7.46876	7.41737	7.23712	7.22219	7.4831	6.87465	6.95554	7.09439	6.75904	7.00791	7.032	7.1414	6.94935	7.00517
ID_chr12_76909036_76909817	7.08887	7.26397	7.20472	7.28382	7.3467	7.46228	7.72254	7.55125	7.76384	7.55264	7.63287	7.738	6.7003	6.74308	6.58348	7.0442	7.15842	6.94296	7.20192	7.15375	7.30277
ID_chr8_105304427_105306556	7.09951	7.364	7.23303	7.27482	7.18472	7.46032	7.58194	7.4356	7.60043	7.46386	7.35263	7.49465	7.06916	7.16628	6.86057	7.15051	6.92167	7.16126	7.14187	7.13438	7.10829
ID_chr10_79864399_79866557	7.05408	7.27976	7.15781	7.26206	7.33627	7.40925	7.25646	7.2022	7.02415	6.87738	6.90624	6.69173	7.16797	7.15144	6.77781	7.18027	7.11542	7.18766	7.15618	7.16711	7.22364
ID_chr11_103852341_103853779	7.35235	7.1857	7.34206	7.25993	7.32033	7.09433	6.93992	7.20865	7.16584	6.78786	6.83559	6.83772	6.93449	6.84601	6.72316	7.16982	7.2355	6.87976	6.88328	7.1074	6.86796
ID_chr19_29140641_29141486	7.08065	7.16249	7.04941	7.25675	7.1177	6.92717	7.43209	7.24831	7.39057	7.54221	7.51878	7.39289	6.76248	6.79592	6.67018	7.10243	7.01682	6.92655	6.99031	7.19402	7.18238
ID_chr2_173173401_173174860	7.42555	7.39799	7.34584	7.24849	7.35108	7.21556	7.21768	6.91905	7.05928	7.28626	7.28993	7.38136	6.96608	7.01739	6.94379	7.15027	7.36244	6.99323	7.10385	7.17411	7.23059
ID_chr19_38930226_38931859	6.7946	6.88547	6.80836	7.19338	7.06171	7.15658	7.37409	7.39269	7.30607	7.17766	6.94927	7.06711	6.50159	6.80698	6.64826	6.82885	6.59909	6.96653	6.916	6.81718	7.12939
ID_chr2_27470322_27471185	7.1556	7.18375	7.2002	7.17644	6.84385	7.02489	7.41785	7.30858	7.43094	7.20702	7.41022	7.10601	6.56022	6.70885	6.49033	6.97135	6.97478	6.8141	7.18423	7.04855	7.14117
ID_chr8_123397376_123399113	6.73009	7.01147	6.78192	7.17544	7.33375	7.21282	7.23998	7.27689	7.37005	6.89619	6.92262	6.60656	6.40384	6.54699	6.37578	6.74453	6.79054	6.71228	6.71832	6.88271	6.89674
ID_chr11_117781455_117782397	6.96788	7.17806	6.90059	7.17016	7.24244	7.32944	7.37859	7.41124	7.5597	7.48161	7.38646	7.59384	6.70773	6.91063	6.8086	7.04581	7.00118	7.01449	7.19249	7.20399	7.2439
ID_chr7_126759135_126760748	7.13859	7.12248	7.076	7.16972	7.11487	7.42729	7.11947	7.17977	7.21124	7.44484	7.22215	7.39733	7.83266	7.755	7.53981	7.27488	7.43936	7.60127	7.26294	7.35264	7.05586
ID_chr16_91804327_91805113	7.14369	7.18916	7.1931	7.16946	7.25462	7.3201	7.38603	7.35655	7.64842	7.45275	7.61563	7.63669	6.38619	6.74927	6.90726	7.02008	6.95975	6.92318	7.14226	7.15266	7.05293
ID_chr2_128143655_128144777	7.01272	7.30885	7.06371	7.15737	7.3774	7.3988	7.76066	7.3184	7.9576	7.76063	7.76644	7.91625	6.22084	6.87013	6.74054	7.17595	7.11082	6.8322	7.31183	7.11035	7.36711
ID_chr9_108452269_108453164	6.89863	7.17623	6.95332	7.15449	7.29131	7.3297	7.31217	7.23919	7.42123	7.24676	7.29784	7.62571	6.94165	6.94572	6.96211	7.08071	7.20122	7.04306	7.02974	6.84694	6.95473
ID_chr3_89146947_89148301	6.47422	6.82488	6.80078	7.1404	7.04535	7.38552	7.2183	7.17952	7.46181	6.98941	7.18596	7.21426	6.09216	6.58752	6.38239	6.49896	6.63231	6.40898	6.61033	6.62056	6.62423
ID_chr9_64792286_64793504	7.18279	7.05674	7.12818	7.13277	7.10123	7.16369	7.40432	7.29935	7.59485	7.46235	7.38371	7.60378	7.08201	7.02993	6.78493	7.19542	7.11387	7.19916	7.13583	7.24631	7.3736
ID_chr17_47610791_47611961	7.13429	7.35079	7.10983	7.12582	7.31148	7.31032	7.33751	7.48797	7.34457	7.34068	7.45355	7.72111	7.65512	7.66146	7.53051	7.50145	7.36032	7.28482	7.56131	7.4733	7.6864
ID_chr11_98438321_98439255	7.13361	7.20266	7.02403	7.11844	7.2153	7.39095	7.33967	7.34494	7.18212	7.07654	7.13891	7.43638	7.55846	7.53391	7.48715	7.18804	7.28489	7.09622	7.2278	7.21505	7.41297
ID_chr7_35646527_35647812	7.19224	7.52623	6.99679	7.11781	7.22544	7.34687	7.32953	7.36275	7.19938	7.54936	7.30903	7.31543	7.6677	7.68219	7.6106	7.43496	7.44241	7.47874	7.3728	7.45169	7.35246
ID_chr1_171033493_171034233	6.44013	6.686	6.73909	7.10492	7.02583	7.1482	7.19541	7.18003	7.35782	6.83475	6.96161	7.10556	6.11258	6.5825	6.64346	6.50305	6.44544	6.56427	6.67634	6.73442	6.85644
ID_chr10_17721962_17722649	7.15046	7.29316	7.27102	7.0799	7.19942	7.07164	7.29925	7.25981	7.22296	7.34416	7.24281	7.273	7.74379	7.55847	7.43624	7.55545	7.59306	7.27392	7.32372	7.39664	7.13303
ID_chr14_101607614_101609406	7.09947	7.07257	7.17307	7.0786	6.78863	6.79603	6.9699	6.91957	6.71323	6.5463	6.41385	6.31477	7.40888	7.22982	7.45507	7.11883	7.09639	6.8258	6.63575	7.08303	6.90777
ID_chr19_46528476_46529288	7.03925	7.03319	7.01048	7.0748	7.30422	7.24159	7.50212	7.32972	7.51227	7.27103	7.44359	7.24576	6.81905	6.89596	6.8	7.1953	6.88159	6.86102	7.209	7.04723	7.2777
ID_chr5_103737268_103738297	6.97123	7.10621	6.76532	7.06811	7.15293	7.14206	7.21051	7.25551	7.3609	7.28177	7.29522	7.34488	6.5446	6.71908	6.96672	6.95228	6.94101	6.48146	7.07795	7.05142	7.07041
ID_chr11_32268861_32269541	6.81808	7.01436	6.90968	7.06577	6.82879	7.09829	6.95901	6.99858	7.23074	7.07912	7.21505	7.23119	6.23022	6.5179	6.19038	6.59007	6.82371	6.39338	6.91585	6.78734	6.75159
ID_chr3_89135824_89136822	7.17968	7.18482	6.94941	7.06274	7.15826	7.36901	7.58354	7.4525	7.54038	7.33178	7.33283	7.39155	6.58292	6.69706	6.68752	6.97775	6.87743	7.01488	7.21325	6.95654	7.09015
ID_chr9_96765306_96766606	6.71736	6.92886	7.05575	7.02949	6.93269	6.94872	7.30977	7.02692	7.43606	6.99741	7.04533	7.30357	6.77463	6.7924	6.8422	6.89893	6.88431	6.83481	6.87686	6.97165	6.82868
ID_chr11_98741580_98742453	6.80965	7.09049	6.98206	7.02535	6.97819	7.03487	7.29697	7.18788	7.31888	7.36792	7.34167	7.34847	7.14779	7.08843	7.20267	6.94141	7.01158	7.31762	6.97585	6.9019	6.91501
ID_chr10_80570934_80572131	6.59117	6.95236	6.77782	7.01395	7.27821	7.16717	7.46111	7.34448	7.46875	7.29186	7.43498	7.63393	6.4131	6.57618	6.69738	6.86723	6.72881	6.83128	6.98387	7.01022	6.85008
ID_chr4_154025697_154026455	6.70034	7.00575	6.79206	7.01133	7.16162	7.35171	7.41374	7.23588	7.62664	7.2558	7.49577	7.54201	6.38815	6.7452	6.72246	6.84485	6.9013	6.71992	7.00841	7.01623	7.00438
ID_chr1_74600876_74601943	6.80134	6.75706	6.72082	6.99064	6.90999	6.9419	7.21127	6.98278	6.99414	6.76108	6.87733	6.75382	6.7283	6.49899	6.64169	6.58059	6.73815	6.49362	6.76383	6.84156	6.75334
ID_chr8_123223891_123225543	6.89113	6.89494	6.81135	6.9899	7.0924	7.12222	6.95074	7.09551	7.2421	7.00904	7.01654	7.04517	6.51543	6.58802	6.88398	6.95923	6.9869	6.7716	6.97755	6.9562	7.09716
ID_chr9_107576742_107577060	6.92438	6.74031	6.70344	6.97331	6.6745	6.91025	7.0435	6.80966	7.02428	6.97422	6.99809	6.9477	6.26774	6.47073	6.59368	6.58846	6.61491	6.58578	6.89698	6.59158	6.56783
ID_chr17_45582228_45583081	6.191	6.81986	6.29539	6.97287	6.78449	6.75561	6.92617	7.0282	7.22379	7.01841	6.84275	7.16055	5.87113	6.04213	6.14972	6.36276	6.35325	6.33184	6.49447	6.47628	6.58399
ID_chr7_45508499_45509415	6.72038	6.73555	6.68039	6.96748	7.02634	6.97713	7.09409	7.05364	7.16202	6.82895	6.81843	7.16599	6.51155	6.22812	6.46542	6.58276	6.61043	6.91564	6.88901	6.66499	6.85705
ID_chr2_152736045_152737107	6.4635	6.35397	6.47933	6.96603	6.78615	6.82126	7.23849	7.30038	7.38561	6.26829	6.53888	6.4006	6.38164	6.37921	6.6028	6.19854	6.40478	6.28414	6.37903	6.23125	6.18214
ID_chr11_4543047_4544140	7.05044	6.94473	6.99698	6.95921	7.08532	6.96558	7.05835	7.28409	7.30604	7.36821	7.26537	7.1789	6.51897	6.98601	6.86025	7.07877	6.94355	6.93313	7.00886	7.08091	7.11
ID_chr2_164878480_164879120	6.6987	6.68034	6.67371	6.93464	6.91419	7.18783	6.85241	6.99329	7.15234	6.91727	6.9235	6.79824	6.63627	6.66226	6.53025	6.63479	6.95598	6.64868	6.8311	6.78181	6.73412
ID_chr4_154024797_154025475	6.57757	6.7572	6.66075	6.9218	6.92608	7.11805	7.1394	7.01476	7.14861	6.99987	7.01487	7.30251	6.09829	6.26043	6.32826	6.73252	6.48209	6.65976	6.96268	6.8313	6.82201
ID_chr8_10990471_10991739	5.99008	6.27623	6.17163	6.92067	6.87734	6.93181	6.9266	7.08508	7.31197	6.41067	6.49339	6.56891	5.26442	5.5873	5.93112	5.90635	6.21807	5.63729	6.23135	6.11958	6.15536
ID_chr2_119166953_119168168	6.52846	6.59382	6.73245	6.90822	6.88884	6.7621	6.99864	6.87662	7.16427	6.9473	6.90608	7.13441	6.21776	6.28031	6.44695	6.54131	6.69207	6.86015	6.68369	6.50866	6.81911
ID_chr10_79916770_79917439	6.70616	6.76079	6.69916	6.90748	6.89773	6.86573	7.04649	6.9474	7.08646	6.95791	6.93946	7.2661	6.55831	6.24144	7.00059	6.56718	6.67886	6.83822	6.50571	6.83499	6.79197
ID_chr16_93147465_93148380	6.80179	6.70956	6.81029	6.90413	6.74916	6.69845	7.04309	7.04579	7.13119	7.07031	6.88631	7.14928	6.55498	6.49932	6.25607	6.76989	6.78425	6.73578	6.91609	6.63884	6.63071
ID_chr17_45555463_45556367	7.16509	7.00229	6.78867	6.90028	6.86192	6.92703	7.0645	6.95329	7.03726	6.79763	6.89415	6.94531	7.44151	7.4599	7.25759	6.92426	6.97965	7.22976	6.8994	6.98404	7.08749
ID_chr8_11001120_11002153	6.40581	6.48222	6.39792	6.89615	6.77576	6.6331	6.88677	7.00542	7.13057	6.67455	6.93957	6.53257	6.09624	5.80798	6.12844	6.44015	6.20513	6.25191	6.69045	6.18683	6.52593
ID_chr9_54704039_54705256	6.59963	6.64687	6.60328	6.89157	6.87391	7.03616	7.11788	7.16163	7.40283	7.1451	7.15425	7.1798	5.78026	6.20031	6.02224	6.45196	6.52332	6.42474	6.78318	6.78661	6.80924
ID_chr9_59672243_59673755	7.45994	7.18027	7.25477	6.8858	6.95708	6.96589	6.91754	6.83614	7.06097	7.2657	7.16429	7.20888	6.96835	6.95277	6.66809	7.23436	7.30976	6.76635	6.92363	7.09898	6.93332
ID_chr8_123416355_123417416	6.68448	6.80842	6.74396	6.87552	6.86787	6.87485	7.11988	6.87992	7.34198	7.20916	7.10773	7.18192	6.28836	6.42055	6.31582	6.38717	6.52598	6.2054	6.61703	6.66404	6.68269
ID_chr7_116031263_116032876	6.60469	6.83425	6.81881	6.85901	6.92703	7.10927	6.9503	7.0281	7.2389	7.14253	6.81735	7.10494	6.46354	6.40196	6.50608	6.61525	6.46437	6.79401	6.82799	6.65179	6.69452
ID_chr17_50469716_50471089	6.52032	6.35572	6.46038	6.85421	6.78832	6.78114	7.04877	6.69687	7.08664	6.51793	6.53774	6.85206	6.7509	6.68427	6.81316	6.54143	6.37029	6.47703	6.75349	6.51713	6.46125
ID_chr17_45581171_45582062	6.51397	6.76294	6.61505	6.84788	6.86798	6.85151	6.81412	7.005	7.1214	6.76494	6.87606	7.02997	6.63054	6.69708	6.59274	6.79581	6.57967	6.76802	6.50448	6.69958	6.4833
ID_chr8_70608259_70608960	6.53665	6.61019	6.44827	6.84418	6.65122	7.0854	6.81471	6.88589	6.88865	6.69569	6.58993	6.88703	6.42993	6.60941	6.1907	6.62309	6.60616	6.49263	6.60614	6.60478	6.65969
ID_chr9_46215164_46216476	6.4627	6.62481	6.65256	6.84294	6.66932	6.78407	6.65781	6.7532	6.6397	6.59013	6.81744	6.63183	6.20109	6.21831	6.28962	6.67417	6.87026	6.28343	6.30578	6.49482	6.49498
ID_chr13_55527214_55528838	7.14601	7.19139	7.20288	6.84195	6.62683	6.94064	6.84522	6.66045	6.7552	7.00135	7.02997	6.99267	6.95134	6.98894	6.88165	6.96358	7.1437	6.69415	6.84853	7.09222	6.89768
ID_chr14_31130798_31131414	6.46834	6.88221	6.3986	6.83015	6.79321	6.85268	6.88489	6.96797	7.16296	6.75931	6.99836	7.1831	6.50045	6.70611	6.95862	6.62183	6.64861	6.72582	6.58194	6.47266	6.52691
ID_chr9_96258454_96258925	6.75946	6.87115	6.59551	6.82816	6.62431	6.755	7.06187	6.98261	6.91416	7.0135	7.08363	6.98603	6.44185	6.34896	6.07072	6.68207	6.7619	6.10218	6.76454	6.57977	6.63455
ID_chr5_103769524_103770802	6.25782	6.31702	6.3071	6.82604	6.75857	6.79534	6.63372	6.77721	7.054	6.79978	6.74736	6.52459	5.79397	5.8854	5.76633	6.22682	6.17444	6.17992	6.26729	6.33134	6.30916
ID_chr9_108661758_108663029	6.31276	6.77292	6.39454	6.81564	6.92649	6.8377	6.99893	6.87403	7.03591	6.93219	6.68024	6.91461	6.60056	6.60126	6.68789	6.61571	6.52935	6.7958	6.60343	6.22915	6.42469
ID_chr14_101653403_101654860	6.7941	6.97677	6.92931	6.81044	6.94423	7.01081	6.8831	6.96843	7.04555	7.24277	7.04932	7.1911	7.44498	7.38439	7.50851	7.164	7.14547	7.31484	7.05643	7.24333	6.95543
ID_chr6_72101966_72102644	6.73678	6.99186	6.73063	6.80797	6.96015	7.08578	7.21155	7.0833	7.36165	7.39259	7.26394	7.22138	6.20091	6.50695	6.21184	6.99081	6.67152	6.91586	7.14431	6.88964	6.89306
ID_chr5_115235304_115236227	6.48193	6.41393	6.48802	6.78701	6.58182	6.70329	6.8375	6.86492	6.94286	6.62368	6.77459	6.54368	6.92871	6.8602	6.72937	6.61459	6.63881	6.60831	6.28109	6.33057	6.68369
ID_chr10_128014868_128015830	6.50853	6.54707	6.46981	6.75909	6.65136	6.71291	6.951	6.68375	6.71273	6.66134	6.64276	6.80093	6.23697	6.3698	6.47577	6.4502	6.01349	6.25317	6.46422	6.2693	6.54027
ID_chr8_35375239_35376961	7.03949	6.82777	7.06783	6.75583	6.95813	6.83976	6.7898	6.65517	6.62213	6.77201	6.86764	6.65828	7.28158	7.13482	7.25215	6.94449	6.97777	6.9893	6.76809	7.06798	6.81398
ID_chr5_103741900_103742497	6.36994	6.52316	6.3251	6.73216	6.57619	6.64697	6.77457	6.54643	6.96771	7.04047	6.95234	7.26503	5.85196	6.39205	6.36244	6.5993	6.30727	6.43941	6.63653	6.45824	6.52629
ID_chr10_17589709_17590772	6.49507	6.2877	6.37449	6.70641	6.68434	6.52071	6.8633	6.75428	7.20124	7.08289	6.904	7.11454	5.57169	5.7117	5.91255	6.10555	6.49055	6.23709	6.34016	6.15561	6.42882
ID_chr4_135816824_135817893	6.88167	7.21046	6.90786	6.70225	6.83856	7.02136	7.34884	7.03295	7.13845	7.3591	7.37366	7.60897	6.65201	6.71136	6.42924	7.03928	6.81815	6.73997	7.14624	6.8983	7.17145
ID_chr2_78858729_78860804	6.70433	6.67839	6.68934	6.69236	6.62875	6.66428	7.11427	7.03955	6.9483	6.90143	6.97767	7.34725	6.54843	6.74781	6.45564	6.72643	6.60114	6.58902	6.74679	6.73779	6.63669
ID_chr19_46887745_46888926	6.90293	6.92885	6.98103	6.69127	6.64668	6.63826	6.74505	6.74128	6.65672	6.4901	6.43688	6.30952	6.84997	6.70543	6.72904	6.90361	6.86559	6.40061	6.73507	6.85469	6.90023
ID_chr13_23465076_23466090	6.37625	6.33387	6.38825	6.67859	6.81427	6.55638	6.64011	6.79011	6.88274	6.41879	6.58168	6.88518	5.89003	6.01652	6.36786	6.31553	6.24788	6.24966	6.33272	6.2932	6.2351
ID_chr11_32255907_32256969	6.25352	6.32373	6.3134	6.66958	6.81765	6.3346	7.07036	6.78719	7.35939	6.93415	7.22286	7.1895	5.62985	5.88825	5.94762	6.10929	6.30238	5.91524	6.41387	6.33481	6.47548
ID_chr13_23463404_23463827	5.83074	5.96361	5.83675	6.65157	6.59993	6.74762	6.74483	6.63296	6.79947	5.91332	6.16548	6.28431	5.36893	5.50185	5.85396	5.60158	5.51376	5.84897	6.06944	5.71714	5.93791
ID_chr15_97767295_97768618	6.7564	6.61343	6.68352	6.64072	6.39415	6.47501	6.35357	6.33754	6.52146	6.46994	6.44253	5.95931	6.88322	6.76144	7.11985	6.66437	6.94193	7.03332	6.31171	6.55258	6.55524
ID_chr2_170151486_170151930	6.72643	6.78818	6.4976	6.60944	6.69805	6.54573	7.01931	6.91482	6.7727	6.93807	6.96883	7.03158	6.40991	6.50363	6.20178	6.72477	6.39749	6.50269	6.65078	6.91852	6.7756
ID_chr2_30544896_30545703	6.89663	6.46639	6.71278	6.60662	6.35814	6.22304	6.43707	6.33573	6.30777	6.20159	6.4183	6.31318	6.92325	6.94761	6.68383	6.6602	6.54313	6.67253	6.49234	6.70658	6.45996
ID_chr8_105312864_105313573	6.63549	6.7144	6.38416	6.59957	6.65886	6.58215	7.11467	6.63615	7.05394	7.0187	7.19697	7.28327	6.06429	6.34576	5.6454	6.35316	6.20325	6.42636	6.46862	6.6173	6.70832
ID_chr10_21295558_21296672	6.53949	6.83651	6.54824	6.59881	6.51973	6.58776	6.68715	6.65954	6.70447	6.82205	6.76825	6.6575	7.09981	6.91455	7.05297	6.8223	6.99079	6.82194	6.6036	6.91071	6.52406
ID_chr8_26047197_26047979	6.30249	6.42931	6.27803	6.59213	6.30977	6.45778	6.78702	6.54252	7.11824	6.93446	6.7033	7.16648	5.57347	5.82143	5.34843	6.02508	5.75936	6.15937	5.99916	6.38437	6.4665
ID_chr2_131518421_131519668	6.14407	6.41912	6.50216	6.58696	6.70926	6.59979	6.94486	6.54548	7.01938	6.77556	6.91849	7.00027	6.07814	6.28013	5.65144	6.41627	6.28564	6.41858	6.34795	6.33862	6.61118
ID_chr8_105961182_105961960	6.80152	6.69452	6.55442	6.56072	6.54831	6.84647	7.10561	6.95574	7.09297	6.99118	6.90475	6.90647	6.4378	6.45527	6.35697	6.76958	6.60852	6.49454	7.09508	6.57282	6.61464
ID_chr11_80766202_80767642	6.22961	6.27841	6.09731	6.55944	6.70924	6.6524	6.73959	6.79937	7.19809	6.7435	6.72313	6.95522	5.62201	5.87811	5.82379	6.10874	5.97178	6.31394	6.24512	6.26398	6.23758
ID_chr19_46766163_46766708	6.32776	6.34559	6.3478	6.54083	6.39502	6.62979	6.91087	6.62311	6.76804	6.59715	6.71759	6.76785	5.96362	5.86827	5.76315	6.30661	6.1487	5.96926	6.40657	6.59332	6.50915
ID_chr1_133744940_133746166	6.09351	5.70844	6.02697	6.5338	6.53082	6.42672	6.43116	6.31214	6.62123	6.17683	6.11768	6.1575	5.79009	5.66741	5.63347	6.08559	5.71929	5.90846	5.95521	6.15951	6.11267
ID_chr15_76262830_76264263	6.59377	6.72379	6.56887	6.5302	6.73906	6.79122	7.13908	6.87346	7.28717	7.2283	7.26707	7.48754	6.24413	6.28385	6.16584	6.47331	6.54443	6.40918	6.96217	6.68812	6.84496
ID_chr5_31596505_31597833	6.18939	6.22721	6.33599	6.5294	6.45988	6.55171	6.46952	6.9196	6.83218	6.13691	6.0839	6.16191	6.18414	6.03583	6.16921	6.34289	6.21207	5.91745	5.97357	6.37675	6.41691
ID_chr16_76293469_76294853	6.046	6.22457	5.93844	6.52725	6.90632	6.83658	6.98747	7.02589	6.75205	6.38599	6.31163	6.64312	5.97717	5.81162	5.76388	6.06398	5.89274	5.86142	6.23818	5.86565	6.24787
ID_chr11_57954371_57955167	6.24582	6.11859	5.87045	6.52306	6.29787	6.11856	6.60585	6.22058	6.43542	6.43171	6.58123	6.82553	5.38903	5.78806	5.45624	6.25516	5.76212	5.94552	6.00262	6.12205	6.089
ID_chr8_79397827_79399843	7.0316	6.78858	6.94699	6.52023	6.38595	6.08866	5.65079	6.0746	5.94502	5.95793	6.10036	5.94771	7.37669	7.05009	7.06223	7.02237	6.81364	6.88305	6.58377	7.12653	6.42111
ID_chr11_11733193_11733661	6.04948	6.0243	5.9022	6.51721	6.30252	6.34685	6.50234	6.46909	6.83088	6.4786	6.65431	6.84312	5.5414	5.59361	5.803	5.98186	6.04815	5.96444	6.1855	6.23509	6.2092
ID_chr13_101611389_101612561	6.28058	6.47673	6.31974	6.51112	6.69107	6.44791	6.87363	6.76512	7.08005	6.93632	7.1641	7.32863	5.61267	5.84198	5.80122	5.8873	6.1065	5.81414	6.34207	6.28813	6.32656
ID_chr4_135120026_135120758	7.25833	6.91889	6.95737	6.46012	6.52741	6.27746	6.27176	6.17615	5.93579	6.41913	6.3751	6.16274	7.69105	7.40637	7.33813	7.30458	7.49691	7.14344	7.08419	7.34333	6.87301
ID_chr3_89337414_89338255	6.34527	6.17847	6.27683	6.44599	6.086	6.20106	5.52023	5.70633	5.64073	5.96912	6.06252	6.07215	6.17913	6.44841	6.11204	6.29503	6.32033	6.05247	5.88235	6.35388	6.18237
ID_chr15_59054645_59055307	6.57125	6.77732	6.45065	6.43917	6.3184	6.47115	6.89849	6.90926	6.95969	6.88967	7.01153	6.8131	6.08356	6.08802	6.00426	6.35701	6.44436	6.22366	6.92218	6.65845	6.85738
ID_chr2_152741395_152742269	5.71176	5.49726	5.55696	6.43878	6.53761	6.19647	5.8401	6.59738	6.33706	5.7434	5.55085	4.9598	6.2882	6.17573	6.3639	5.8509	5.62457	6.03646	5.61194	5.5484	5.3812
ID_chr11_32250707_32251383	6.31057	6.38959	6.29502	6.43425	6.31324	6.58619	6.70664	6.70894	6.98236	7.03377	6.98049	7.23283	6.10305	5.8932	6.01182	6.3401	6.28598	6.53908	6.54642	6.38271	6.54718
ID_chr19_42255479_42256470	6.70171	6.41415	6.61557	6.42876	6.2705	6.20774	6.18345	6.11944	6.16711	6.21806	6.2534	6.12324	6.88478	6.98434	6.75282	6.68481	6.69114	6.53325	6.50365	6.73673	6.66719
ID_chr5_121461268_121462695	5.98455	6.12087	6.06507	6.42258	6.51691	6.58064	6.73074	6.4405	7.04235	6.5445	6.88941	6.65753	5.25316	5.69262	5.5148	5.8332	5.86467	5.88631	6.10312	6.03341	6.12188
ID_chr10_127317230_127318647	6.3237	6.32018	6.34269	6.41397	6.67516	6.53543	6.63477	6.83917	7.21642	6.6831	6.89577	7.0085	5.77757	5.91426	6.30954	6.27202	6.25621	6.13014	6.35464	6.49789	6.55257
ID_chr4_119108426_119109550	6.51637	6.42446	6.43878	6.40134	6.31837	6.27423	6.19471	6.09249	6.30423	6.11354	6.20939	6.04063	7.22358	7.26166	7.40311	6.68768	6.92651	6.82326	6.64588	6.51093	6.273
ID_chr8_122547755_122548319	6.91639	6.78858	6.80199	6.38533	6.67896	6.69647	6.83759	6.77444	6.31411	6.70803	6.82226	6.58839	7.56112	7.61137	7.4384	6.92429	7.24671	6.97633	6.91112	7.06758	6.96302
ID_chr8_84877457_84878095	5.14891	5.14057	4.96405	6.38061	6.29662	5.99163	6.12105	6.26682	6.62165	4.9449	5.16079	5.26897	4.18134	4.28095	4.6868	5.03282	4.59323	4.60353	5.01359	5.25642	5.05798
ID_chr15_76666966_76667823	5.80924	6.15962	5.65329	6.38048	6.02706	6.05652	6.37233	6.29428	6.60208	6.4932	6.14346	6.25884	5.38692	5.60413	5.59678	5.82098	5.85632	5.77097	5.82962	5.47276	6.19912
ID_chr15_79932256_79933079	6.41261	6.49852	6.28317	6.37957	6.4853	6.46066	6.46683	6.54066	6.63789	6.64785	6.74388	6.89028	6.89078	6.84815	6.71557	6.76162	6.57495	6.81341	6.45397	6.57891	6.48818
ID_chr2_152914174_152915198	6.55524	6.3759	6.327	6.37401	6.09328	6.19487	6.27749	6.35444	5.94063	6.24819	6.09693	5.95683	6.80446	6.63239	6.54752	6.54011	6.58138	6.34495	6.49923	6.41712	6.44382
ID_chr9_72530244_72530600	6.51776	6.49244	6.43918	6.3731	6.30465	6.40593	6.65856	6.39373	6.47877	6.44004	6.51685	6.67454	7.16604	7.09742	6.79145	6.68245	6.88447	6.34326	6.58648	6.44138	6.33291
ID_chr10_41604544_41605774	5.85164	5.8744	6.1852	6.35907	6.21357	6.30046	6.54106	6.29126	6.42352	5.84653	6.01492	6.29076	6.01617	5.93146	6.20514	5.88941	5.9914	5.90747	6.05911	5.96926	5.9249
ID_chr19_46905158_46906522	6.09159	6.23173	6.13643	6.34356	6.37746	6.19894	6.78442	6.5767	6.75949	6.70949	6.58373	6.83259	5.60098	5.54558	5.64005	6.07264	6.0061	5.89629	6.35179	5.98744	6.2797
ID_chr16_30235933_30236833	6.06458	6.1021	6.08438	6.32849	6.35006	5.9935	6.01073	6.15024	6.19716	5.82833	5.91175	5.91752	6.47781	6.41681	6.50346	6.23036	6.22523	6.05724	5.86758	5.9583	6.01061
ID_chr5_24452813_24453291	6.20061	6.25991	6.08274	6.3261	6.63095	6.56862	6.22348	6.3883	6.5147	6.29779	6.2543	6.27433	5.88055	5.97654	6.04101	6.27295	6.14357	6.25014	5.98789	6.05656	6.01751
ID_chr15_59058924_59059568	6.1664	6.45354	5.88967	6.31847	6.21244	6.36319	6.87966	6.78918	7.08704	6.81597	7.15949	7.06812	5.727	5.88186	5.61836	6.22389	6.30022	6.04156	6.7257	6.37186	6.39716
ID_chr15_78564512_78566165	6.01935	6.04398	6.384	6.31821	6.37985	6.64256	6.74082	6.63783	7.19845	6.67003	6.80595	6.91516	5.32257	5.85446	6.03403	5.73777	5.94476	6.10307	6.19048	6.09226	6.14527
ID_chr19_43599647_43600527	6.53568	6.59073	6.45234	6.30104	6.01654	6.26976	5.98193	5.92765	5.97622	5.8773	5.98773	5.63046	6.07049	6.25382	5.99902	6.30045	6.37492	6.00112	6.0951	6.48739	6.50402
ID_chr5_137313491_137314615	6.16259	6.0505	6.18843	6.30007	6.2176	6.15293	6.11018	6.05371	6.14795	6.17741	6.38329	6.25522	5.46621	5.89627	5.58566	5.90722	5.9315	5.79392	6.01633	6.30047	6.29613
ID_chr3_89152016_89152783	6.34675	6.4508	6.33894	6.29025	6.33125	6.21641	6.67749	6.40147	6.57933	6.3102	6.41395	6.30475	5.73345	5.95244	5.93268	6.08392	5.98056	6.0421	6.19131	6.17797	6.19854
ID_chr8_105469277_105469711	5.63489	5.79144	5.68109	6.28966	6.31746	6.24755	6.25477	5.81298	6.01633	5.86269	5.76776	5.65916	5.53185	5.21973	5.49149	5.76674	5.14213	5.46748	6.00686	5.56378	5.87618
ID_chr7_115844433_115845336	5.59965	5.66977	5.71175	6.26711	6.29567	6.33107	6.82624	6.63705	6.93997	6.81683	6.7418	6.9893	5.09821	5.13887	5.59035	5.7151	5.51656	5.8522	6.16888	5.90847	6.03691
ID_chr8_23144242_23144878	5.53326	6.31272	5.87249	6.25559	6.10982	6.65702	6.70396	6.51894	6.52183	6.34676	6.57931	6.43615	5.31248	5.52644	5.26429	5.96548	5.9143	5.7472	6.2458	5.94975	6.2744
ID_chr8_105685390_105686915	6.45878	6.51545	6.68083	6.23757	6.34172	6.31335	6.18086	6.41939	6.2355	6.4088	6.29043	5.84836	6.79521	6.79915	6.75016	6.74764	6.49034	6.5789	6.5137	6.64484	6.6766
ID_chr15_78436800_78438363	5.66298	5.78856	5.3451	6.21038	6.12922	6.14367	6.15373	6.4126	6.17278	6.07475	5.91258	5.96623	5.32637	5.47519	5.44959	5.47007	5.61618	5.17026	5.55223	5.46044	5.68161
ID_chr11_78158934_78159451	6.40586	6.32244	6.46886	6.20696	6.26876	6.42706	6.13785	6.4884	6.39945	6.73526	6.73687	6.7999	6.88825	6.97589	6.76417	6.60242	6.41232	6.54467	6.64576	6.63469	6.2232
ID_chr1_138136081_138136809	6.20182	6.22913	5.97171	6.19965	5.93637	6.08539	6.02193	5.94815	5.94318	5.85809	5.79998	5.76405	6.58313	6.48763	6.03025	6.22242	6.13049	6.09213	6.17037	6.2349	6.09308
ID_chr13_23464029_23464684	5.55635	5.62523	5.61725	6.19928	6.13071	5.94332	5.81376	5.96737	6.35907	5.72601	5.83779	5.67991	4.86401	5.15987	5.4359	5.55954	5.66404	5.63595	5.88918	5.78977	5.86149
ID_chr16_76300561_76302097	6.00921	5.74566	6.04012	6.17573	6.20149	6.15389	6.25014	6.39107	6.37182	5.79664	6.15993	6.26237	5.52215	5.52053	5.52736	6.12668	5.98791	5.80184	6.01644	5.96152	6.0323
ID_chr12_79352006_79353287	5.98892	5.86631	6.15443	6.16442	6.34682	5.91226	6.53369	6.43434	6.817	6.28805	6.59093	6.22968	5.62514	5.62491	5.79043	5.84107	5.85258	5.7943	5.90883	5.82367	5.85438
ID_chr17_26513997_26515160	5.66416	5.93215	5.49653	6.13393	6.15104	5.94417	6.56855	6.12868	6.51135	6.21482	6.18614	6.60674	5.35628	5.67571	5.61984	5.69614	5.7898	5.7037	5.83854	5.87167	5.88385
ID_chr18_75454813_75455835	6.51676	6.02382	6.04162	6.13268	6.34428	5.90954	5.58988	5.85725	5.83456	5.57043	5.34275	5.63321	6.29875	6.30651	6.14618	6.4851	6.30621	6.16591	6.221	6.40764	6.10083
ID_chr7_63928951_63929392	5.85524	6.03663	6.1524	6.11829	5.89562	5.93179	6.36077	6.22059	6.57124	6.3791	6.64509	6.93343	5.44456	5.6882	5.65466	5.72428	5.8224	5.73634	6.1459	5.92079	6.02959
ID_chr9_77993096_77994317	5.94174	6.05505	5.92689	6.10965	6.17244	6.19439	6.65356	6.37534	6.88157	6.66188	6.51719	7.08847	5.2865	5.62807	5.30488	5.75962	5.74282	5.65544	6.08842	6.03732	5.70093
ID_chr2_132055028_132056159	6.42968	6.09117	6.60615	6.09419	5.80322	6.00215	5.67795	5.89154	5.8114	6.52258	6.16745	6.17974	5.85645	5.9538	6.1534	6.09209	5.82979	5.79908	6.27068	6.21686	6.31564
ID_chr13_83524139_83524993	6.22601	5.90484	5.94752	6.08525	6.13925	6.04961	6.02555	6.08803	5.80269	6.01341	5.89006	5.87703	6.51481	6.49086	6.46054	6.21553	6.11188	6.4025	6.07823	5.93415	6.02417
ID_chr13_21711557_21712057	6.02349	6.03665	5.92249	6.05984	6.07424	6.17435	6.42184	6.14369	6.66852	6.30018	6.27641	6.34013	5.39293	5.48581	5.32591	5.75612	6.01455	5.80429	6.01879	5.98208	6.01636
ID_chr12_111337499_111338706	6.81505	6.84765	6.95948	6.03519	6.19977	6.13468	5.72825	5.68541	5.76958	6.25513	6.2737	5.64758	6.65156	6.54024	6.27598	6.5863	6.74763	6.43225	6.49696	6.7999	6.5096
ID_chr5_75450395_75452268	5.75901	6.0679	5.83822	6.03309	5.96237	5.91613	6.33577	6.11464	6.52014	6.06558	5.80437	6.36501	5.34887	5.04967	5.07915	5.77147	5.57859	5.70189	6.0097	5.86362	5.70523
ID_chr17_29419748_29420673	6.12691	6.08326	6.01311	6.00338	6.16325	6.41091	6.41572	6.1767	6.63613	6.25999	6.5198	6.18461	5.53018	5.68301	5.63261	5.99103	5.99162	5.85675	6.26066	6.12633	6.04039
ID_chr7_64014160_64014987	5.53625	5.77612	5.77408	5.99716	5.9851	6.01636	6.12072	5.86609	6.06264	5.8849	5.88303	5.93712	5.58115	5.53054	5.33168	5.58882	5.89679	5.65106	5.60093	5.72115	5.58893
ID_chr7_109635982_109637069	3.42823	3.45494	3.29157	5.99472	5.62101	5.57368	5.42817	5.39243	5.84007	3.33836	2.99092	3.45997	2.85081	2.7711	3.24743	3.217	3.39807	3.03904	2.98116	3.52592	3.48381
ID_chr2_153542637_153543615	5.44566	5.61663	5.52254	5.99017	5.90485	5.39722	5.91333	5.99087	6.23072	5.71494	5.67469	6.12564	5.09518	5.26495	5.1486	5.48556	5.63555	5.35351	5.60504	5.65937	5.64304
ID_chr17_32188949_32190210	5.91015	5.67191	5.83192	5.98262	5.99704	5.98502	5.99914	5.76885	5.70122	5.49851	5.44342	5.16441	5.67577	5.61601	5.52764	5.63623	5.67435	5.49634	5.52264	5.40401	5.53136
ID_chr9_64985112_64986055	6.41659	6.56868	6.45272	5.97611	6.1624	6.06886	6.34834	6.02621	5.95548	6.46436	6.60651	6.60943	6.19226	5.76998	5.78333	6.48159	6.08343	6.06976	6.57973	6.33411	6.37378
ID_chr4_155162262_155164186	6.54164	6.08469	6.24256	5.95861	6.1397	5.90901	5.27761	5.7232	5.24176	5.52137	5.63626	5.25596	6.64346	6.61647	6.59304	6.32971	6.50286	6.66617	6.06483	6.11528	6.15197
ID_chr12_4132915_4133763	5.99479	5.73903	6.05159	5.95727	5.89039	5.59137	5.33293	5.62512	5.30635	5.22245	5.21516	4.98568	6.20636	6.26299	6.4337	6.09846	6.11343	6.24968	5.89223	5.8886	5.84282
ID_chr9_77954477_77956270	5.22241	4.989	4.97713	5.94944	6.20931	6.05321	6.4649	6.21009	6.07787	4.84121	4.8232	5.28314	4.87379	4.9152	4.98042	4.90245	4.77878	5.24678	5.12134	4.84515	5.03726
ID_chr11_19992366_19993149	5.74617	5.4387	5.78134	5.94173	6.13561	5.90756	5.98422	5.92305	6.3636	5.7819	6.0248	5.82971	5.36026	5.39559	5.51809	5.51582	5.54616	5.80417	5.54626	5.57834	5.60477
ID_chr7_103877019_103877537	5.66764	5.65595	5.82269	5.93473	5.96169	5.88798	6.121	6.06024	6.4038	6.48731	6.3982	6.49148	4.88721	5.63123	5.70689	6.00144	5.90949	5.57033	5.84506	5.62326	5.9304
ID_chr17_50510811_50511213	5.77781	5.98944	5.56457	5.92288	5.96659	6.42365	6.29334	6.14356	6.31378	6.1802	6.01377	6.23898	5.7727	5.30306	5.33904	5.71878	5.78154	5.4796	6.09393	6.15928	5.91609
ID_chr11_110457307_110458042	5.87722	5.83148	6.13188	5.9084	5.76297	5.73326	6.12858	5.9067	6.31606	6.32314	6.37213	6.41117	5.41093	5.67126	5.50438	5.99687	5.78454	5.80765	6.01476	5.76525	5.93828
ID_chr9_67874809_67875243	5.62911	5.75501	5.28765	5.89705	5.73514	5.72098	6.16933	6.06118	6.32885	6.10073	6.02527	5.95707	4.86568	4.82337	5.05279	5.38182	5.44511	5.24563	5.73278	5.63918	5.6902
ID_chr17_47578417_47579247	5.39799	6.08255	5.21152	5.89599	5.63954	6.12304	6.60977	6.44362	6.92798	6.73941	6.80894	7.08484	4.64048	5.21865	5.11185	5.69512	5.60847	5.78599	6.20938	5.92926	5.84255
ID_chr11_22813446_22814325	6.30683	6.06785	6.3798	5.88896	6.16124	5.82193	5.65023	5.7371	5.67622	5.43782	5.29647	5.11949	6.58953	6.2402	6.22031	6.15577	6.54917	6.12659	5.99612	6.25244	6.13403
ID_chr13_23751463_23751994	4.94133	5.67981	5.38652	5.87813	6.13486	6.0133	6.13355	6.2591	6.17518	5.9425	5.98274	6.08982	5.17967	5.38075	5.53699	5.43253	5.49633	5.47325	5.53089	5.53904	5.46168
ID_chr11_101984059_101985250	6.26575	5.92996	5.93243	5.876	5.79938	5.68533	5.37647	5.64578	5.69631	5.74193	5.84582	5.50774	6.59241	6.52514	6.47173	5.73831	6.01842	6.25075	6.03411	5.99921	5.86108
ID_chr11_19939034_19939990	5.83347	5.67533	5.58991	5.87547	5.55356	5.46381	5.29078	5.51139	5.05416	5.11735	5.34635	4.68736	5.96228	5.58877	5.72633	5.82864	5.75533	5.64276	5.93099	5.91283	5.62242
ID_chr9_64017650_64018349	5.8928	5.34647	5.61967	5.87196	5.95319	5.87246	5.59791	5.62107	5.95655	5.49866	5.55682	5.06612	5.07187	5.37969	5.11936	5.76081	5.57944	5.61089	5.53617	5.16767	5.64176
ID_chr14_16366582_16366959	5.4704	5.45218	5.43662	5.86963	5.82204	5.86277	6.12526	6.08892	6.21911	6.04851	6.21159	6.4857	4.92629	5.06949	4.95615	5.35039	5.41702	5.25246	5.65626	5.50507	5.7616
ID_chr5_140609464_140609765	4.54376	4.75787	4.64454	5.86226	5.64004	5.75053	5.28542	5.50215	5.93111	5.25372	5.39642	5.33031	4.50653	4.73554	4.6709	4.64102	4.68946	4.92796	4.98251	4.76556	5.09178
ID_chr11_61958696_61959369	5.72981	5.38301	5.51809	5.85833	5.73015	5.75723	5.96698	6.03846	6.0966	5.93985	5.90551	6.29226	4.90726	5.07706	5.29981	5.61113	5.7374	5.56403	5.84107	5.62948	5.56199
ID_chr16_93131258_93131837	5.47627	5.64564	5.58838	5.85826	5.84321	5.80286	5.98628	5.96858	6.43685	6.05365	6.25222	6.40661	5.06061	5.29849	5.06846	5.33748	5.49277	5.3334	5.66229	5.5358	5.31664
ID_chr9_96704814_96706280	5.62305	5.42505	5.68591	5.84106	5.89925	5.97491	5.80922	5.78267	5.8838	5.4708	5.51953	5.54592	5.20799	5.58805	5.66313	5.48248	5.15367	5.25791	5.44406	5.29009	5.36712
ID_chr13_101661344_101662048	6.18669	6.46279	6.18909	5.83712	6.08294	6.09655	6.25465	6.12439	6.57329	6.76512	6.64375	6.94061	5.78725	5.89074	5.83344	6.47125	5.86641	6.03436	6.23001	5.94167	6.17472
ID_chr11_78073651_78074558	4.34738	5.18881	4.23618	5.83683	6.04804	6.23645	6.53277	6.16677	6.87185	6.33787	6.68945	7.10274	3.85582	4.43715	4.45012	4.93403	5.21884	5.54562	5.66193	5.58503	4.95677
ID_chr11_4487391_4488168	6.00041	6.3206	5.91759	5.83212	5.49502	5.24803	5.69023	5.17967	5.66966	5.95328	5.93107	5.93869	5.54918	5.63099	5.41478	5.93423	5.9949	5.76243	6.14763	5.90079	5.91536
ID_chr5_75376818_75378029	6.52759	6.32731	6.45022	5.82645	6.03377	5.91553	6.31324	5.98439	6.43012	6.94931	6.80163	6.99631	5.6698	5.76639	5.8116	5.97621	6.00709	6.15393	6.35269	6.34553	6.44172
ID_chr2_128427578_128428440	5.81905	5.5267	5.87203	5.8023	5.60333	5.84655	5.39691	5.45423	5.35611	5.22821	5.21189	5.14298	5.91459	5.81759	5.613	5.8019	5.89636	5.44641	5.59747	5.87115	5.65821
ID_chr2_128428532_128429685	5.62537	5.47051	5.68887	5.79724	5.56457	5.6744	5.10539	5.69893	5.25809	4.84864	5.04147	4.69189	5.51278	5.41133	5.64458	5.52002	5.50159	5.56516	5.42199	5.5479	5.13698
ID_chr9_109094543_109096180	5.61398	5.6656	5.5442	5.77791	5.86155	5.77369	5.32881	5.51701	5.3494	5.08188	5.35242	5.02136	5.69798	5.56229	5.98127	5.75613	5.64944	5.75559	5.45084	5.72915	5.91669
ID_chr9_55170332_55171301	5.55889	5.59504	5.08599	5.76734	5.87177	5.9495	6.19546	6.13497	6.40082	6.34141	6.11515	6.08448	5.03334	5.04885	5.01415	5.54565	5.34887	5.59098	5.50141	5.64916	5.42868
ID_chr9_64077916_64079040	6.14383	5.70055	6.10725	5.76222	5.54125	5.40445	5.15156	5.27569	5.24468	5.51177	5.32619	5.21417	5.91568	5.71995	5.84368	6.03948	6.00507	5.89954	5.63355	5.82908	5.62655
ID_chr2_153558328_153559058	5.74971	5.99482	5.69371	5.7571	5.92383	5.8748	5.48464	5.66258	5.72746	5.19721	5.16051	5.33216	5.82659	5.76136	5.61085	6.22271	5.71584	5.62977	5.90117	5.93457	5.73097
ID_chr14_55853766_55855587	6.05413	5.75881	6.3331	5.75476	5.66472	5.6843	5.11227	5.38527	5.0612	5.44552	5.57663	5.40016	6.18662	6.30056	6.06075	6.03451	6.03659	5.73123	5.55142	6.05347	5.93037
ID_chr9_108083581_108084019	5.59224	5.5136	5.07825	5.73553	5.76277	5.87589	5.67424	5.92464	6.36263	6.20615	6.11045	5.93201	4.69297	5.28468	4.97201	5.26485	5.27324	5.18049	5.53878	5.28916	5.64464
ID_chr8_122548961_122549356	5.47093	5.38047	5.42122	5.69036	5.6371	5.45509	5.96234	5.8025	5.75475	5.7266	5.7351	5.8279	5.30197	5.03507	5.41069	5.49185	5.44565	5.45541	5.59823	5.36513	5.41429
ID_chr5_143924718_143925653	5.39545	5.48451	5.25296	5.68592	5.767	5.73188	6.21525	5.87619	5.99639	5.99131	5.73089	6.14336	4.88452	5.14532	5.00796	5.53532	4.85818	4.80858	5.57142	5.5115	5.4355
ID_chr7_126456315_126457219	6.34668	5.96557	6.26771	5.68128	5.36407	5.68885	4.99949	5.35017	5.06579	5.81534	5.76822	5.73502	5.91059	5.67792	5.63463	6.06037	6.04102	6.0675	6.04002	6.04115	5.91561
ID_chr17_84161100_84162266	5.90245	5.59684	5.79359	5.67352	5.24036	5.63432	5.29551	5.19656	5.29432	5.47163	5.57344	5.41654	6.28899	6.19234	5.79317	6.04567	6.07814	5.90655	5.59632	5.62866	5.76692
ID_chr5_3482165_3482866	5.44022	5.33188	5.09487	5.6603	5.70742	5.45798	5.70736	5.67344	6.01115	5.46247	5.75371	5.5953	4.8125	4.98423	5.14403	5.28682	4.90292	5.15372	5.10909	5.31263	5.27731
ID_chr1_74584625_74585134	5.69451	5.746	5.64638	5.65879	5.70238	5.63546	6.13797	5.8522	6.35278	6.25051	6.32081	6.36536	4.84825	5.40218	5.4892	5.48854	5.70747	5.64993	6.05399	5.63209	5.63619
ID_chr12_57184394_57184791	5.3806	5.52139	5.4574	5.65213	5.70415	5.73974	5.92531	5.68788	6.11722	5.89514	6.28644	6.29889	4.6618	4.50638	4.50758	4.99769	5.11875	5.26175	5.5783	5.49594	5.15455
ID_chr11_69364897_69365404	5.38049	5.15943	5.03678	5.65043	5.27769	5.35395	5.6007	5.83921	5.8361	5.66381	5.7122	5.71404	5.09942	5.26019	5.40245	5.22098	5.25826	5.31197	5.21021	5.15257	5.45144
ID_chr9_107935687_107936877	5.75156	5.5974	5.78915	5.64332	5.62875	5.52886	4.98875	5.23298	4.95995	5.42439	5.30582	4.99033	5.83797	5.6643	5.76731	5.70794	5.53364	5.73164	5.32467	5.48365	5.87565
ID_chr3_100480657_100481151	4.88936	5.1759	5.01187	5.6236	5.29817	5.34033	5.50709	5.38405	6.23233	5.67815	5.68319	5.83636	4.28309	4.51899	4.87746	4.88697	4.72758	4.87497	5.0774	4.91047	5.12454
ID_chr17_26502765_26503444	6.10119	5.89817	5.64135	5.60848	5.60425	5.391	5.4599	5.59599	4.91021	5.56831	5.32221	5.16569	6.80779	6.49605	6.32197	6.12362	6.02946	6.30796	6.03423	6.10049	5.71837
ID_chr18_77668503_77669328	5.17818	5.27378	5.29428	5.54369	5.60568	5.38072	5.49526	5.47107	6.09237	5.86064	5.76822	6.12642	4.476	4.55967	4.57526	5.1079	4.72206	5.00839	5.38947	5.39639	5.19636
ID_chr17_50506986_50507339	5.51273	5.44424	5.37089	5.53724	5.45512	5.72213	5.85256	5.79731	6.15141	5.79543	5.58006	5.8701	5.16585	5.15956	4.8662	5.85377	5.64345	5.29546	5.6496	5.45185	5.81559
ID_chr13_83571942_83572805	5.51459	5.42617	5.67435	5.51313	5.4537	5.26917	5.28018	5.49611	5.40185	5.11555	5.31888	5.20483	6.5388	6.20051	6.289	5.83477	5.66493	5.77081	5.8085	5.87891	5.75347
ID_chr11_62027213_62028407	5.5102	5.31681	5.53822	5.50431	5.44215	5.64238	5.43976	5.67726	5.71183	5.70929	5.70794	5.70861	4.92338	4.96394	4.85076	4.99845	5.3598	5.11961	5.48484	5.14415	5.41937
ID_chr4_135267945_135268411	5.29797	5.12545	4.82974	5.50234	5.39906	5.48752	5.68786	5.6763	5.99272	6.13191	6.2163	6.22321	4.42478	4.7097	4.66785	5.21073	4.9509	5.11537	5.43557	5.39309	5.5178
ID_chr11_98738855_98739245	5.44025	5.24903	5.15861	5.4927	5.23469	5.19141	5.74283	5.76148	6.11174	6.03452	5.86408	5.59884	5.03832	5.26603	5.23352	5.37636	5.28827	5.30648	5.83774	5.54893	5.59928
ID_chr2_167894913_167895709	5.78804	5.83874	5.89514	5.49237	5.81057	5.66901	5.59417	5.64028	5.76692	5.7575	5.50298	5.58634	6.11168	6.42319	6.23114	5.79904	5.82624	5.96341	5.75695	5.68443	5.66741
ID_chr11_78072449_78073140	4.85651	5.04764	5.13595	5.47864	5.91869	6.19563	6.36548	5.5315	6.73466	6.24871	6.07557	6.52769	4.5034	4.81016	4.52479	5.16813	5.25645	5.31321	5.40444	5.24458	5.63195
ID_chr3_37482515_37483492	5.0694	4.96906	4.93459	5.47506	5.50133	5.09551	5.84379	5.28093	5.87762	5.41925	5.35477	5.61566	4.48313	4.2791	4.30861	4.78422	4.42802	4.38268	5.19428	4.5308	4.66274
ID_chr4_62368649_62369704	5.47999	5.40823	5.43028	5.47197	5.43534	5.43635	6.24512	5.99778	6.04481	5.93226	5.85935	6.35136	4.84427	4.96751	4.80846	5.4844	5.11243	5.58766	5.96661	5.64075	5.57695
ID_chr11_4338963_4339991	4.39197	3.93446	3.92014	5.46444	5.21344	4.95936	4.93786	5.1581	4.90259	4.08922	3.50755	4.12606	4.22177	4.33796	4.48495	4.09095	4.07594	4.40241	3.9952	4.01974	3.93727
ID_chr9_45040562_45041930	6.15221	5.83783	5.88048	5.46111	5.7976	5.5848	5.2656	5.38433	5.20943	5.3586	5.55588	5.11899	6.14693	5.86568	5.57128	5.72966	5.84615	6.04146	5.89696	6.03282	5.83127
ID_chr15_103248188_103248701	4.86166	5.53884	4.67947	5.45633	5.54054	5.44813	5.64195	5.89597	5.31818	4.84569	4.93797	4.81786	4.7515	4.58943	4.48535	5.29436	5.02544	4.88703	4.81482	4.94919	5.2711
ID_chr8_122538587_122539074	5.06747	5.32813	5.18576	5.45512	5.70103	5.46058	5.38263	5.72085	5.82154	5.45539	5.66432	5.36435	4.70212	4.62423	5.1601	4.92251	5.05703	5.37445	5.2297	4.98407	5.60727
ID_chr11_113669485_113670607	5.37626	5.51914	5.56058	5.45258	5.47992	5.49717	5.72669	5.41029	5.96478	6.22739	5.86209	6.30841	4.76182	5.29066	5.26409	5.52043	5.4602	5.78021	5.54463	5.70782	5.60412
ID_chr4_140945631_140946764	5.57422	5.56302	5.60466	5.43394	5.51808	5.45339	5.79465	5.44242	5.72855	5.73784	5.83792	5.79643	4.74966	5.14549	5.45275	5.12813	5.54346	5.35874	5.43192	4.92839	5.17957
ID_chr4_32356084_32356781	5.81324	5.7534	6.19934	5.42131	5.17591	5.42737	5.0313	4.96572	5.0493	5.78991	5.77984	5.98504	5.86003	5.72839	5.58789	5.82213	5.92885	5.60791	5.88176	5.93287	5.68854
ID_chr6_108695162_108696535	5.46793	5.41585	5.54515	5.41816	5.4864	5.03426	4.89252	5.41394	5.58376	5.06824	5.29324	4.84991	6.25934	5.86889	5.81147	5.47198	5.77734	5.69293	5.33826	5.69438	5.52107
ID_chr2_72479810_72480192	5.35582	5.31803	5.26018	5.40032	5.3429	5.44956	5.50566	5.6837	5.73212	5.53122	5.52781	5.55589	4.85873	4.6131	4.34632	5.11582	5.08706	5.07526	5.35001	5.43072	5.01919
ID_chr16_93127796_93128255	4.71723	4.72234	4.8932	5.39121	5.06721	4.94361	5.27544	5.08551	5.71433	5.24252	5.39309	5.41979	4.09833	4.64326	4.32591	4.74351	4.5559	4.50881	4.91522	4.69577	4.47987
ID_chr13_42301098_42301791	5.73398	5.49699	5.84043	5.36358	5.19366	4.94597	5.04268	4.82529	4.9915	5.01845	5.42162	4.96331	5.94099	5.87498	6.0353	5.77005	5.77007	5.45609	5.63415	5.78621	5.30049
ID_chr9_69289379_69291326	5.81317	5.8502	5.85179	5.36138	5.52865	5.52829	4.96588	5.34291	4.87081	5.16958	5.23283	5.32329	6.24481	6.29956	6.50856	5.98057	6.1222	6.06148	5.765	5.94706	5.68036
ID_chr9_108404214_108405134	5.2697	5.51827	5.22259	5.33304	5.59863	5.58074	5.80618	5.89928	5.87381	5.34571	5.32549	5.62312	4.80412	5.07087	4.5937	5.33381	4.94071	5.39133	5.29966	5.2203	5.26867
ID_chr11_68597841_68598641	4.68175	4.44587	4.57838	5.26399	5.4506	5.08158	5.18118	5.36567	5.3675	4.69732	4.71357	4.20748	4.3428	4.39118	4.16596	4.42181	4.69195	4.25054	4.88118	4.77652	4.01948
ID_chr9_110463915_110464650	5.84627	5.59036	5.78095	5.25814	5.18853	4.89821	5.14517	5.34724	4.6673	4.90027	5.04561	5.12518	6.07738	5.62691	5.85379	5.68568	5.79062	5.1338	5.69011	5.80019	5.60352
ID_chr11_113666250_113667026	5.20009	5.33139	4.98141	5.25168	5.31613	5.41622	5.21617	5.75852	5.59686	5.76347	5.36049	5.79231	5.09125	4.99332	4.79399	5.15164	4.69907	4.89841	5.21306	5.09725	5.26433
ID_chr2_102886170_102886874	5.12045	5.15501	5.19496	5.24953	5.12933	5.8071	5.99826	5.75273	6.10909	5.9702	6.29993	6.08018	4.87337	4.86161	4.40512	5.31361	4.81118	4.90869	5.53558	5.26634	5.66317
ID_chr6_48859892_48860854	5.55908	5.26642	5.62196	5.23842	5.04004	5.21891	4.78167	4.8018	4.77539	4.73064	4.59598	4.7027	5.97465	5.9365	5.88634	5.68565	5.9134	5.52335	5.30591	5.10954	5.33302
ID_chr11_68899902_68900294	4.75285	5.05447	4.79604	5.22309	5.10293	5.1222	5.49561	5.45958	5.4778	5.50912	5.42821	5.70789	4.04777	4.64996	4.37453	4.99241	4.75954	4.85165	4.62687	4.77345	4.89284
ID_chr2_170343034_170344300	5.60585	5.14413	5.52761	5.21489	5.01544	5.22154	4.82816	4.83222	4.71795	4.50346	4.94249	4.89962	5.94362	5.78181	5.9871	5.61912	5.82188	5.46673	5.25531	5.55561	5.27954
ID_chr13_51729625_51730515	4.99984	5.07898	5.18371	5.19549	5.38948	5.1734	5.59029	5.47169	5.58314	5.30403	5.35198	5.11957	5.01783	4.83872	5.27198	4.8525	4.6616	5.2226	4.93878	4.86367	5.0809
ID_chr2_27758139_27759505	5.26072	5.1348	5.42782	5.18224	4.70847	5.4523	4.91531	4.77334	4.8043	4.77971	4.9099	4.59203	5.31101	5.57179	5.46941	5.58836	5.48818	5.33775	5.46841	5.38277	5.45698
ID_chr11_68996941_68998197	4.82867	5.1077	5.29584	5.17359	4.97197	5.13889	5.08232	4.97166	5.78449	6.08846	6.28936	6.55517	4.34017	4.99176	4.84678	4.87955	4.8019	5.06817	5.12695	5.29911	5.57118
ID_chr12_76790336_76791145	5.07193	5.19201	5.623	5.17149	5.05284	5.17067	5.36352	5.13046	4.92767	5.78443	5.57618	5.85244	4.68334	4.94253	4.54748	5.10836	5.34319	5.21822	5.43847	5.37374	5.47286
ID_chr15_59089587_59090216	5.46312	5.48203	5.54028	5.16694	5.20275	5.59569	5.26597	4.91912	5.14466	4.9601	5.1186	5.21484	5.77999	5.67488	5.9202	5.61923	5.32686	5.47003	5.44013	5.47195	5.54591
ID_chr5_135118383_135119145	5.04383	4.96341	4.73485	5.14543	4.73703	4.93474	5.15862	4.87062	4.64935	5.0123	4.84167	4.74729	5.79853	5.55251	5.35862	5.4207	5.41818	4.96652	5.18505	4.90876	5.20815
ID_chr6_48839928_48841730	5.51066	5.19136	5.61945	5.0651	5.15619	5.04152	4.38544	4.61495	4.36182	4.58313	4.38611	4.65129	6.12418	5.84654	5.84961	5.41803	5.54263	5.54253	5.48561	5.21912	4.98592
ID_chr8_105858988_105859233	4.37683	4.50357	4.60042	5.05827	4.96517	5.10181	4.73508	4.73591	5.17391	4.66015	4.60865	4.72385	4.0775	4.17119	4.52301	4.28428	4.59624	4.2038	4.51757	4.50367	4.5886
ID_chr2_45058230_45058755	4.33039	4.55597	4.43128	5.057	4.77702	4.31302	5.01081	5.08945	4.99949	5.15228	5.29625	5.548	4.05641	4.2309	4.55015	4.40544	4.20692	4.67242	4.22188	4.72351	4.38895
ID_chr8_72135014_72136042	5.12564	5.33482	5.2614	5.05437	4.84996	5.16821	4.68275	4.9139	4.89468	5.02997	4.58464	4.41382	5.85181	5.82185	5.4156	5.42288	4.76108	5.63649	5.35815	5.15065	5.13858
ID_chr7_109671344_109672257	5.08984	4.79385	5.12467	5.04755	5.0528	5.08211	4.26101	4.58586	4.28287	4.14137	4.26616	4.29334	4.80548	4.61087	4.9348	4.8977	4.96251	4.91053	4.74904	4.81272	4.36095
ID_chr12_70999050_71000019	5.3548	5.21406	5.69499	5.04615	5.19843	4.74749	5.32295	5.21534	4.94586	4.70832	5.08684	5.52079	5.888	5.78079	5.78296	5.28908	5.69618	5.71673	5.41199	5.72821	5.69842
ID_chr13_83573369_83574517	5.02914	5.19018	5.45212	5.04291	5.43206	5.2811	5.16658	5.28574	5.52215	5.18811	5.17765	5.57062	4.69764	4.59206	4.61693	4.78508	5.02719	5.01623	4.95452	5.04831	5.06366
ID_chr2_173089327_173089844	5.58376	5.18076	5.45187	5.04053	5.44613	4.965	4.94408	5.02868	4.713	5.23898	4.96636	5.11567	5.59339	5.65302	5.56381	5.46257	5.60346	5.39719	5.37683	5.19538	5.18393
ID_chr2_152735035_152735325	4.85409	4.86164	5.02406	5.03293	5.36438	5.04327	5.65415	5.44736	5.39838	4.8836	4.7426	5.13774	5.0798	5.13697	5.31918	4.72203	4.9289	5.00526	4.87722	5.15766	4.84366
ID_chr10_40133620_40133996	5.11989	5.25339	4.75411	5.02593	5.21128	4.62218	5.85181	5.19516	5.37623	5.48334	5.42399	5.75727	4.23656	4.29021	4.46414	5.05013	4.92052	4.6256	5.46899	4.67171	5.28344
ID_chr1_75145637_75145932	4.43191	5.27758	4.75079	4.9925	4.55532	4.67876	5.11464	4.92758	4.93551	5.47934	5.76435	5.55247	4.46143	4.85069	4.61395	4.88539	4.73929	4.58688	5.22251	5.05842	5.13596
ID_chr2_152962060_152962918	5.58691	5.2693	5.3483	4.96514	4.7871	4.7374	4.96737	5.12727	4.87136	4.93174	4.69116	4.87371	5.93547	5.76276	5.84105	5.4821	5.30483	5.561	5.2349	5.29292	5.25878
ID_chr19_10210185_10211780	4.49349	5.17975	4.6875	4.95899	5.12956	5.4476	5.3991	5.45568	5.30602	5.24058	5.48369	5.61887	4.15598	4.29042	4.48232	4.59178	4.5161	4.91441	4.42715	4.78764	5.19019
ID_chr8_105157537_105158473	5.05381	5.00161	5.24761	4.94855	4.86224	4.75115	4.81311	4.59373	4.35353	4.73964	4.65219	4.67381	5.10987	5.10564	5.25898	5.26961	5.11552	5.23799	4.71172	4.70182	4.92969
ID_chr5_65257655_65258611	5.09819	5.40297	4.93522	4.91782	4.98068	4.97212	5.02544	5.0243	4.96042	6.049	5.96245	5.86479	4.53828	4.55269	4.76768	5.19211	5.09894	5.16219	5.61546	5.30486	5.45565
ID_chr15_76248245_76248478	4.82669	5.20819	4.58538	4.88822	4.80427	4.79319	5.13154	4.983	5.33086	5.35375	5.397	5.42458	4.54447	4.64898	4.4041	4.61248	4.38297	5.2388	4.78506	4.77767	5.02915
ID_chr4_40195007_40195803	5.18806	5.16707	5.14835	4.87449	4.84716	4.51913	4.17107	4.03088	3.96287	4.544	4.73983	4.80413	5.18321	4.79498	4.9166	5.08503	5.02963	4.57184	4.93866	5.1424	4.84914
ID_chr6_94957190_94957595	4.84053	5.10194	5.28043	4.87144	4.51967	4.58598	4.70401	4.60803	4.95956	5.38086	5.48538	5.27595	4.93167	4.99243	4.61488	5.11983	4.83702	4.69088	5.29691	5.08799	4.8382
ID_chr7_115951446_115952111	4.33455	4.70868	4.74629	4.87061	5.00121	4.78191	5.28707	5.04522	5.2147	4.91529	5.35193	5.33218	4.21913	4.37939	4.34168	4.15993	4.44666	4.85047	5.10805	4.52686	4.6545
ID_chr11_117974355_117975147	5.01018	5.18934	4.91866	4.84615	4.7953	5.23666	4.62122	5.00299	4.58221	4.3689	4.52733	4.41645	5.51802	5.24139	4.9913	5.49356	5.2127	4.96835	4.9739	5.38322	5.14276
ID_chr17_25715467_25716490	4.05983	4.44681	3.79499	4.84271	4.83686	5.07785	5.3015	5.48293	5.38993	4.58278	4.55115	4.23962	4.09601	3.98446	3.68289	4.18933	3.79546	4.31765	4.41462	4.20858	4.19675
ID_chr6_128299843_128301175	5.07388	5.14926	4.94341	4.81312	4.88323	5.04274	4.95028	4.55242	4.4478	4.5513	4.56558	4.56522	5.10996	5.31235	5.08077	5.30639	5.41151	5.08537	5.1491	5.15209	5.2824
ID_chr11_103332376_103333210	5.01616	5.25019	4.76931	4.79564	4.5079	4.62131	4.50472	4.36442	4.31799	4.61665	4.7238	4.86356	5.57414	5.72084	5.4741	5.05114	5.002	5.2104	4.89228	5.16374	4.9684
ID_chr9_59584606_59585277	5.04153	4.81284	5.23902	4.79012	4.94903	5.05382	4.67859	4.84623	4.85183	4.56128	4.84696	4.77793	5.5975	5.3896	5.5644	5.34927	5.15019	5.05883	4.782	5.07573	4.65732
ID_chr11_84412830_84413896	4.70698	4.89367	4.50271	4.77489	5.14974	5.00387	5.08319	5.22955	5.49481	5.14929	5.47581	5.285	4.25201	4.34062	4.51477	4.83299	4.22834	4.70447	5.0272	4.79709	4.72895
ID_chr1_75255629_75256468	5.6477	5.47061	5.6239	4.76521	5.10448	5.10215	4.29772	4.89569	4.42729	5.26447	4.8949	4.75118	5.55581	5.54201	5.3432	5.82297	5.89861	5.3551	5.31738	5.58264	5.39831
ID_chr17_86535506_86536724	4.86634	4.75164	4.93836	4.76422	4.83215	4.64286	4.66651	4.44086	4.33072	4.60951	4.62639	4.22492	5.1681	5.07009	5.19444	4.97042	4.79999	4.96025	4.82705	4.47188	4.4686
ID_chr5_3206070_3206668	4.65226	4.57249	4.6383	4.75403	4.97311	4.6834	4.9942	5.05415	5.08655	4.66841	4.51354	4.25047	4.41424	4.36244	4.53381	4.4248	4.32281	4.21532	4.67996	4.77909	4.63863
ID_chr2_170321579_170322489	5.31375	5.23847	5.21937	4.7407	4.79507	4.62766	5.01942	4.3756	4.51232	4.39728	4.66971	4.74058	5.68526	5.74049	5.73302	5.64733	5.21056	5.08169	5.06672	5.09715	5.46496
ID_chr17_25716864_25717719	4.66815	4.77855	4.59545	4.73835	4.68987	5.03311	5.32729	5.14616	4.95658	4.79717	4.73054	4.69439	4.25914	4.41186	4.43045	4.53076	4.40366	4.52552	4.41728	4.48821	4.53094
ID_chr4_119105686_119106126	4.62161	4.44906	4.77052	4.72233	4.44111	4.14337	4.12577	3.93621	3.76198	4.37356	4.24088	3.93855	5.2714	5.18815	5.19119	4.92309	4.76369	4.7575	4.61015	4.78115	4.3864
ID_chr11_104445600_104445852	4.57005	4.60196	4.51784	4.72218	4.43852	4.72538	5.20515	5.03541	4.985	5.00016	4.91495	4.61177	4.08755	4.21947	4.41078	4.57209	4.25904	4.70382	4.64397	4.59541	4.42299
ID_chr11_114535881_114536471	5.24757	5.28268	5.21353	4.68489	4.57481	4.47792	4.24093	4.55754	4.35288	4.6047	4.89609	4.41462	5.07584	5.00937	4.66847	5.07217	5.18597	4.81956	4.97635	5.09401	4.49298
ID_chr16_91793382_91794009	4.95606	4.68747	4.98309	4.63726	4.76155	4.45409	4.48637	4.69738	4.67105	4.65342	4.80262	4.20426	5.4423	5.0531	5.28283	5.13294	5.17615	5.19173	4.97039	5.08974	5.04742
ID_chr4_136180972_136181213	4.15272	4.3204	4.10131	4.6221	4.14558	4.81295	4.52312	4.64402	4.42689	4.82223	4.45152	4.44972	3.38486	4.04836	3.87559	4.2323	4.03017	4.18486	4.21305	4.49706	4.12787
ID_chr12_110936767_110937366	5.29958	4.95677	5.14943	4.61302	4.46672	4.70839	5.1001	4.79057	5.14335	5.27845	5.18625	5.60625	4.48134	4.78661	4.18438	4.96288	4.77307	4.7235	4.98376	4.91788	5.06096
ID_chr9_56200642_56201397	4.48099	4.7468	5.15535	4.57391	4.60885	4.87258	4.77367	4.52639	4.49179	4.31157	4.57893	4.25503	5.32726	5.45228	5.05926	5.12977	5.35188	4.86294	5.06399	4.87969	4.44545
ID_chr7_102478279_102478881	3.89204	4.046	3.76104	4.56861	4.69835	4.79247	4.50122	4.81005	4.60437	4.3176	4.43069	4.77942	3.74993	3.66094	3.66658	4.03267	3.77307	4.22019	4.04001	4.26299	4.35004
ID_chr10_99268546_99269136	5.11945	5.0454	5.25502	4.56749	4.93123	5.02319	4.76496	4.90785	5.08099	4.59793	4.79068	4.88663	5.59062	5.54932	5.47683	5.29987	5.49273	5.37551	5.1134	5.33353	5.2494
ID_chr1_193201021_193202016	5.02704	4.92536	4.89016	4.56088	4.73301	4.50572	4.14364	4.38206	3.83383	4.03481	4.53025	4.20297	6.2131	5.81325	6.06028	5.17771	4.85695	5.4769	5.12257	5.33548	4.8131
ID_chr4_32364972_32365853	4.70353	4.55613	4.67391	4.51128	4.17199	4.05966	4.3693	4.26165	3.38189	3.96758	3.97665	3.83705	4.79084	4.53439	4.7334	4.93334	4.4868	4.21478	4.3314	4.21853	4.71661
ID_chr19_5148606_5149433	4.51953	4.30852	4.34354	4.50635	4.62496	4.33386	4.09832	4.07405	4.01932	3.96477	4.02295	3.62425	4.64522	4.55681	4.46265	4.34901	4.53304	4.53444	4.49146	4.6662	4.52265
ID_chr16_32608172_32608430	4.55067	4.52612	4.34081	4.50273	4.06767	4.60011	4.70154	4.254	4.91147	4.75236	4.63687	4.96429	4.00707	3.68777	4.31497	4.28422	3.78598	4.12057	4.67111	4.55274	4.67279
ID_chr11_102753068_102754686	4.45891	4.51947	4.63965	4.50191	4.42892	4.04587	3.75797	3.59042	3.61441	3.91518	4.01322	3.81985	5.27381	5.04191	5.30938	4.37392	4.67362	4.42859	4.13064	4.43355	3.91014
ID_chr4_59420524_59421764	5.3447	5.16961	5.4389	4.49799	5.05526	4.61737	4.20327	4.89781	4.54622	4.6938	5.09828	4.84674	5.85082	5.652	5.62352	5.75384	5.62593	5.22824	5.3684	5.62256	5.37457
ID_chr9_64860110_64860888	3.91732	4.22311	3.97804	4.49175	4.27217	4.15406	4.90221	4.70102	5.10562	4.94143	4.82162	5.09618	3.72546	3.51834	3.88002	4.2033	3.43681	4.06215	4.17009	4.42314	4.33304
ID_chr2_153521208_153521601	4.14311	4.66431	4.12892	4.47664	4.79877	4.73364	4.82162	4.99734	5.02966	4.41933	4.16736	4.34552	3.80123	3.861	4.21624	4.08145	3.91558	4.3888	4.14513	3.95078	4.44608
ID_chr13_23689502_23689954	4.54573	4.79185	4.64298	4.47368	4.64709	4.5103	5.17405	4.79773	5.12426	5.10288	4.71864	5.05439	4.14515	4.3021	4.28577	4.33591	4.50576	4.51268	4.40662	4.88246	4.51885
ID_chr7_35045723_35046691	4.72511	4.85506	4.60408	4.46217	4.69881	4.23569	4.92266	4.45854	4.5796	5.21103	5.03558	5.13868	4.16163	4.57465	4.33768	4.53849	4.04101	4.60254	4.60034	4.46487	4.67262
ID_chr15_62113248_62113804	4.49013	4.23099	4.46791	4.46052	4.59203	4.79236	4.91009	4.87488	4.86291	4.78912	4.39269	4.5096	3.87145	4.13633	4.09833	4.17688	4.15833	4.35807	4.0092	3.97564	4.51081
ID_chr4_62286955_62288019	4.40875	4.2748	4.70341	4.43013	4.39926	4.09632	3.95205	4.10924	4.01206	4.21067	4.19841	4.38237	4.88405	4.743	4.86068	4.75221	4.76125	4.574	4.36444	4.34657	4.63864
ID_chr7_141653409_141653859	4.12955	4.32968	3.95095	4.42389	4.52019	4.55987	4.21406	4.57059	4.74814	4.37051	4.70802	4.48635	3.6492	3.60764	4.00726	4.2422	4.26229	3.88904	4.23442	3.89386	4.04721
ID_chr1_128081142_128081844	4.27249	4.43338	4.33783	4.42328	4.15448	4.46289	4.534	4.35249	5.03124	4.88856	5.05557	4.8082	3.7258	4.38087	3.76462	4.17794	4.09127	4.46708	4.63299	4.19539	4.55351
ID_chr11_4576100_4576680	3.77553	3.75728	4.04312	4.41969	4.53134	4.48459	4.29049	4.56548	5.08968	3.72637	3.85451	3.89836	3.23088	3.42812	3.78495	3.83874	3.62773	3.41379	3.80292	3.70323	3.92187
ID_chr1_131765438_131766103	4.40426	4.64864	4.86965	4.40509	4.59714	4.26359	4.55302	4.45047	4.30684	4.56199	4.33844	4.87215	5.2019	5.52519	5.13266	4.81828	4.98912	4.72503	4.54732	4.93064	4.18666
ID_chr6_87502240_87503394	4.72708	4.67644	4.97581	4.33062	4.5869	4.72594	4.12808	4.43926	3.87444	4.1796	4.11848	4.18447	6.07912	5.91072	5.60537	5.18363	5.3406	5.00257	5.29036	5.56445	4.90787
ID_chr5_31595778_31596157	4.14178	3.91649	3.86484	4.33001	4.42375	4.24387	4.27235	4.36607	4.36728	4.0095	3.88897	3.69504	3.34766	3.41744	3.84916	3.94284	3.6119	4.01055	3.7881	3.40715	3.58795
ID_chr6_134054479_134055915	5.13839	4.95582	5.21334	4.28887	4.88588	4.77693	4.75653	4.41889	4.03351	4.46374	4.48899	4.63728	5.74828	5.53948	5.42999	5.45407	5.44732	5.47793	5.09693	5.31501	5.05419
ID_chr17_28768921_28770641	4.69372	4.72646	4.68367	4.28311	4.63073	4.44179	4.1497	4.54286	3.88819	4.83515	3.97224	3.86968	5.13828	5.32197	5.44544	4.66702	4.42825	4.8223	4.5142	4.99008	4.49994
ID_chr14_70191485_70192430	4.46142	4.40496	4.52935	4.27919	4.40234	4.44337	3.73147	4.04181	3.59289	4.11274	4.03693	3.68529	4.59034	4.47142	4.78632	4.6419	4.39202	4.45027	3.99929	4.07775	4.40557
ID_chr2_170324118_170324406	4.58607	3.9721	4.35658	4.27228	4.08925	4.04119	3.55165	3.83028	3.31607	3.88731	3.74082	3.86262	4.48214	4.47042	4.20213	4.20376	3.98539	3.7252	4.01213	4.47368	4.12708
ID_chr11_80145775_80146323	4.43389	4.37058	4.67351	4.25617	4.10976	4.02476	3.87387	4.06102	4.0033	3.82562	3.59205	4.05643	5.33601	4.83237	5.10497	4.60325	4.4626	4.70682	4.70473	5.06279	4.70879
ID_chr4_141367948_141368634	4.52613	4.02455	4.13412	4.24584	3.9721	3.87069	3.78727	3.84279	3.51397	3.89954	4.05286	3.87935	4.6655	4.65758	4.87982	4.24829	4.19424	4.20852	3.80382	3.63221	3.80069
ID_chr2_32637773_32638373	4.0237	3.97683	3.8858	4.23638	3.9228	3.8161	3.79989	3.83854	3.82077	4.06193	3.58664	3.81699	4.61744	4.3824	4.60597	3.88613	4.01204	4.21039	3.62489	3.89139	3.46276
ID_chr6_134064877_134065533	4.40468	4.64628	4.73837	4.23468	4.30725	4.7128	4.0214	4.20675	3.88462	3.93494	3.96912	4.23119	5.63752	5.56695	5.01929	5.25272	4.53954	4.94362	4.63114	5.10369	4.54285
ID_chr4_150015331_150015937	4.47491	4.30468	4.80771	4.20506	4.29588	4.16814	3.64514	3.70461	3.57248	3.60461	3.80996	3.58396	4.26989	4.04431	4.21912	4.59791	4.61056	4.09053	3.74377	4.10287	4.03806
ID_chr13_83590793_83591402	4.31576	4.43671	4.47283	4.16235	4.47361	3.85539	4.52403	4.19832	4.50561	4.55563	4.41258	4.70444	3.52428	3.79385	3.98835	3.97737	4.24481	3.87062	3.96792	3.75118	4.33119
ID_chr1_74467222_74467950	3.91461	4.17746	3.63214	4.15951	4.22518	4.21285	4.85314	4.70296	4.41808	4.87878	4.99186	4.64802	3.77657	3.63923	3.63915	4.08752	3.90575	4.07366	4.26105	3.45537	4.28322
ID_chr11_22762151_22762940	4.38738	4.16723	4.20157	4.156	4.21673	3.86548	3.56072	3.30174	3.72356	3.85675	3.63286	4.04623	4.61473	4.24676	4.45112	4.21239	4.60459	4.31329	3.91445	4.40672	3.72986
ID_chr5_65057508_65058670	4.72216	4.33537	4.54635	4.15065	3.86276	4.03427	3.757	3.68863	3.66136	4.17142	4.13077	3.51981	4.44647	4.40433	4.43748	4.42516	4.50358	4.12725	4.20651	4.40512	3.96092
ID_chr15_50869297_50869939	4.41375	4.19353	4.56483	4.13915	4.4203	4.08027	3.33429	3.81943	3.47679	3.47275	3.77676	3.50145	4.56876	4.72512	4.4821	4.30045	4.49304	4.53998	4.62407	3.85095	4.16519
ID_chr7_46586782_46588363	4.32187	4.15444	4.32531	4.1351	3.99052	3.89111	3.73767	3.72085	3.64322	3.46893	3.65654	3.90281	4.70622	4.65252	4.77348	4.41224	4.48868	4.48908	3.76183	3.96302	4.55148
ID_chr2_152868648_152869607	3.48402	4.36961	4.21072	4.12085	4.10723	3.87553	4.20605	4.57021	4.9099	4.58694	4.50667	4.54572	3.42224	3.60206	3.59091	3.9766	4.07325	3.5799	3.92401	4.15541	4.24349
ID_chr9_66485436_66485808	3.78471	3.62688	3.79932	4.11083	3.62673	4.06829	4.29567	3.9579	4.1289	4.45138	4.1676	4.2416	3.26334	3.39513	3.25881	3.92218	3.58585	3.92227	3.87728	4.0057	3.99288
ID_chr4_82933515_82934223	3.97071	3.91863	3.86423	4.08972	3.99105	3.46755	3.45353	3.67712	3.88698	3.57756	3.93393	4.10033	4.80975	4.37748	4.63274	4.12709	4.38935	4.12136	3.99888	4.42446	3.77195
ID_chr11_117265637_117266728	4.31029	4.30774	4.74877	4.08139	3.82849	4.33335	3.68816	3.80572	3.83149	3.60452	3.86232	3.82718	5.32443	5.15368	5.21819	4.54922	4.93194	4.32615	4.41214	4.59718	4.43981
ID_chr13_37482546_37483618	4.47854	4.35161	4.74211	4.07816	4.21142	4.27764	3.66282	4.03218	3.60684	3.79209	3.96374	3.88949	5.45358	5.3264	5.62413	4.45253	4.73044	4.7679	4.65177	4.84951	4.68905
ID_chr11_68386639_68387458	4.28133	4.08901	3.93382	4.07354	3.57629	3.70699	3.54547	3.51576	3.78457	3.52053	3.41955	3.35356	4.08979	3.99764	4.51801	4.00094	3.90227	3.71735	4.17305	4.28367	4.28359
ID_chr4_62673518_62674702	4.39468	4.13857	4.24306	4.07194	4.06246	4.16931	3.85579	3.37033	3.25959	3.65027	3.57631	3.78764	4.96934	4.66096	4.51362	3.97393	4.52016	4.26718	4.07844	4.33284	4.03877
ID_chr4_62699329_62699814	4.05124	4.00616	4.49126	4.05678	3.81578	3.66243	3.22854	3.42482	3.38762	3.33175	3.05774	3.4986	4.63858	4.6759	4.44932	4.22552	4.64005	4.74877	3.85575	4.09036	3.66652
ID_chr9_59638231_59638947	4.55836	4.08619	4.15804	4.03859	4.03626	4.06672	4.50013	4.57239	4.60273	4.61676	4.7908	4.55127	3.65215	3.9455	3.93143	4.14337	4.07412	4.2203	4.14238	4.16786	4.10458
ID_chr6_115619664_115620295	4.11068	3.99296	4.20887	4.03655	3.79442	3.69611	3.36077	3.76635	3.79182	3.75016	3.54201	3.64428	4.53956	4.55421	4.11368	4.54188	4.27381	4.11378	4.2697	4.33769	3.82835
ID_chr19_27218525_27219302	4.27111	4.23894	4.50976	4.03444	3.68514	3.764	3.44315	3.33431	3.35633	3.7051	3.60079	3.74059	4.29691	4.34039	4.11145	4.33384	4.43071	4.43183	4.04035	4.29483	4.20249
ID_chr7_19851894_19852625	4.28617	4.19154	4.2588	4.01936	4.09425	4.16625	3.34114	3.4424	3.72859	3.50814	3.81099	3.62255	4.0195	3.91792	4.22461	4.20081	4.13863	4.21003	4.02503	3.94628	4.32054
ID_chr4_62619204_62620179	4.33149	3.95975	4.27734	4.00193	3.85732	3.41546	3.2207	3.29604	3.44144	3.07836	3.36574	3.69759	4.56082	4.0885	4.4399	4.21765	4.49631	4.73923	3.90313	4.08212	4.17054
ID_chr13_43784658_43785576	4.8639	4.50398	4.93738	3.99402	4.14657	3.93142	3.60524	3.41245	3.62682	3.61418	3.40704	4.10632	5.75165	5.51336	5.26474	5.3884	5.22312	5.03115	4.99646	4.93913	4.75307
ID_chr15_64153967_64154760	3.47312	3.16565	3.31347	3.97721	4.10425	4.03854	3.80776	3.96686	4.39231	3.3393	3.63732	3.80946	3.00945	2.79642	3.34411	3.12473	3.1834	3.65556	2.6956	3.33298	3.43709
ID_chr4_62661278_62662641	3.96932	4.30543	4.50299	3.97133	4.11802	4.10836	3.51332	3.93822	3.54935	3.2424	3.54432	4.09706	5.85003	5.4476	5.15363	4.81394	4.42702	5.1579	4.32407	4.73977	4.29976
ID_chr16_76352132_76353182	4.29192	4.50979	4.35781	3.94069	4.72713	4.24461	4.86548	4.70447	4.85264	4.9499	4.84969	5.12747	3.90143	4.00139	3.7435	4.33181	3.92508	3.88555	3.87498	4.12734	4.76289
ID_chr4_141477447_141478112	3.72922	3.9853	4.25144	3.91119	3.86877	3.62665	3.35316	4.05032	3.60791	3.63805	3.41083	3.52704	5.55136	5.37896	5.26324	4.46924	4.3634	4.70207	4.30969	4.68276	4.4231
ID_chr10_67071739_67072320	3.84828	3.95524	3.77919	3.90752	3.60476	3.67681	3.43433	3.54017	3.13811	3.1654	3.38874	3.53869	4.75219	4.50752	4.21794	4.11194	4.07048	3.76107	4.01022	4.41485	3.74159
ID_chr17_31995674_31996714	4.78106	4.81435	4.94267	3.90603	3.75615	4.03127	3.65528	3.74421	3.71581	4.41938	4.36213	4.30802	5.00693	4.76835	4.61633	4.88446	5.11151	4.42154	4.52879	4.837	4.47697
ID_chr17_87255377_87256571	4.14391	3.99162	3.85633	3.88563	3.79238	3.95943	3.60401	3.6691	3.64328	3.521	3.53911	3.64163	4.53995	4.5299	4.62434	4.24705	4.52828	4.28193	3.70517	4.16288	4.33775
ID_chr9_55283560_55284198	5.05577	4.3779	4.94075	3.86774	4.50486	4.63592	4.38073	4.09765	4.12502	4.48556	4.43388	4.15976	5.08902	5.29575	4.79836	4.77208	4.79388	4.87085	4.74593	4.66706	4.85481
ID_chr8_23045837_23046201	2.8455	3.23616	2.95934	3.81717	3.72044	3.82134	3.57852	3.67085	4.38073	3.02403	2.81741	3.24105	2.69487	2.77966	2.81671	2.75747	2.76802	3.15201	3.06201	2.91355	2.94037
ID_chr9_108146371_108146916	4.50154	3.71022	4.51898	3.80882	4.08921	3.51381	3.41646	3.54333	3.26611	3.28148	3.37982	3.61226	4.70406	4.23145	4.34011	4.28718	4.30575	3.82538	4.36902	4.39645	4.0837
ID_chr11_32564820_32565640	4.52534	4.58669	4.88451	3.80821	4.35044	4.35055	3.97581	3.59612	3.84124	3.75872	3.40013	3.81152	5.88907	5.65848	5.59571	4.82962	5.04115	4.87189	4.34711	4.80469	4.70901
ID_chr8_122481781_122482066	2.74108	3.03949	3.06446	3.80294	3.66473	3.9021	3.27268	3.49801	3.47764	3.52107	3.34352	3.3861	2.57684	3.02475	3.28905	3.00027	2.81611	3.19335	3.31661	3.04088	3.43592
ID_chr6_116374503_116374873	3.5124	3.33515	3.51955	3.78558	3.59516	3.49181	3.95844	3.69822	4.33036	3.3801	3.77257	3.87777	3.00415	2.94358	3.42931	3.53687	3.17493	3.32988	2.98364	3.08844	3.49682
ID_chr4_151001179_151001918	4.81436	4.31732	4.63554	3.76635	4.11583	3.74629	3.32067	3.24866	3.40307	3.87249	3.76607	3.48712	4.74673	4.49847	4.57871	4.43549	4.58022	4.38581	4.31772	4.34469	4.10406
ID_chr19_27216729_27217958	4.47931	3.50999	4.25934	3.75892	3.66919	4.00138	3.92482	3.49607	3.40268	3.73266	3.58445	3.51417	4.22168	4.43733	4.60688	4.34753	4.07622	4.46264	3.92111	4.04954	3.98357
ID_chr14_55148346_55148846	3.89028	3.87733	3.90938	3.74009	3.75772	3.50136	3.63983	3.53324	3.80165	3.87214	3.43822	4.04849	4.55357	4.61447	4.2031	4.15145	3.99008	4.01262	3.95446	4.17244	3.90805
ID_chr11_80753165_80754049	3.46454	3.32814	3.29655	3.73769	3.36608	3.97894	3.85136	3.82717	4.59159	3.89488	4.03505	4.15516	3.11907	3.12918	3.29514	3.03807	3.0233	3.77088	3.49532	3.30398	3.67864
ID_chr15_62348874_62349576	3.76604	3.13716	3.60842	3.72744	3.47616	3.53701	4.00137	3.56386	3.91819	3.91644	4.30118	4.20805	3.17526	3.12219	3.17926	3.53135	3.22444	3.3775	3.66888	3.29513	3.24653
ID_chr13_37470358_37470926	4.0535	3.97919	4.04826	3.69714	3.23825	3.68929	3.10897	3.43743	2.93649	3.70587	3.5845	3.47302	4.34165	4.06285	3.81765	4.26751	3.94953	3.84263	3.68939	4.07577	3.24885
ID_chr10_61128744_61129448	3.06485	3.48578	3.35701	3.6826	3.37034	3.81163	3.79465	3.69586	4.25415	4.08162	4.02151	4.34452	2.92424	2.78062	3.32791	2.98034	3.35701	3.13632	3.06174	2.89735	3.62115
ID_chr3_37259238_37260115	3.52041	3.91739	3.82137	3.68013	4.07475	3.41621	4.60089	3.94125	4.45212	4.40314	4.15139	4.33526	3.34726	3.4172	3.85014	4.0517	3.84946	3.65832	4.05327	4.07856	3.90703
ID_chr14_7994223_7994941	3.87415	3.81798	3.89327	3.66151	3.68608	3.63359	3.46317	3.33896	2.93057	3.24856	3.77275	3.67429	4.78237	4.62989	4.62224	4.0031	3.90339	4.60504	4.45296	4.24691	3.56797
ID_chr8_72168783_72169706	4.1322	4.04891	3.71872	3.65254	3.90096	3.75844	3.59045	3.86493	3.59017	3.6213	3.59684	3.61274	5.56512	5.16798	4.91641	4.5038	4.39673	4.50114	4.15248	4.62784	4.21948
ID_chr8_106054194_106054506	4.02993	3.70683	3.82572	3.64969	3.90772	3.31524	3.21259	3.39035	3.35518	3.40314	3.04198	3.37499	4.87527	4.16851	3.74986	4.10344	3.82488	4.09823	3.75695	3.94199	3.92831
ID_chr10_86023221_86023463	4.14451	4.3128	4.17101	3.64804	4.50497	4.13956	4.51545	4.68657	4.74147	4.71697	4.85789	4.84624	3.43611	3.86986	3.48376	4.15599	4.08941	4.34868	4.50033	4.36623	4.1187
ID_chr11_97718190_97718901	3.18371	3.38502	3.16795	3.63345	3.48736	3.62151	2.92207	3.57607	3.08227	3.32973	3.11655	3.15863	4.49064	4.4114	4.92283	3.22579	3.8854	4.24016	3.28436	3.92321	3.4849
ID_chr4_62633907_62634562	3.93778	3.64831	3.76702	3.58748	3.38261	3.70034	2.94613	3.33103	2.88079	3.00151	3.21106	3.51207	4.24144	3.94693	4.04115	3.87905	3.75725	3.64572	3.80386	4.11319	3.69425
ID_chr11_16987491_16988236	2.86165	3.27609	3.51589	3.5732	3.43081	3.41399	3.67302	3.31858	3.4467	3.11845	3.34132	3.20848	4.27764	3.97996	3.89709	3.4409	3.06858	3.49159	3.678	3.52413	3.55822
ID_chr11_96735834_96736494	3.6909	3.75955	3.56624	3.56851	3.48226	3.3111	3.29746	3.06391	3.27657	3.10809	3.03885	3.15494	4.30364	3.69949	4.2578	3.96469	3.66323	4.12285	3.55599	3.80898	3.54751
ID_chr15_77830637_77831059	3.55187	3.20024	3.78442	3.56152	3.22711	3.30367	3.52119	2.98765	3.07769	3.2164	3.18459	3.57971	4.04204	3.99093	4.01317	3.74292	3.93008	3.94838	3.92743	3.69117	3.47205
ID_chr8_105623043_105623476	3.98801	4.63924	4.1658	3.53092	3.91037	4.03261	3.75431	3.78353	3.60401	3.89204	4.21301	3.82836	4.71862	4.7774	4.78783	4.62804	4.16949	4.50376	4.15882	4.08531	4.27266
ID_chr4_62685149_62685840	3.40814	3.43343	3.46269	3.52332	3.07265	3.04806	3.03566	2.83441	2.61226	2.82833	2.69709	3.0754	4.02148	3.46246	4.03533	3.4776	3.32724	3.66527	3.32908	3.28113	3.23956
ID_chr9_56894025_56894348	4.37046	3.878	3.78133	3.51137	3.60766	4.10256	3.59236	3.59394	3.14308	3.34324	3.84878	3.1979	4.28371	4.11402	4.33504	3.90496	4.13199	4.19969	3.85839	4.1751	3.6801
ID_chr4_32372949_32373784	3.83021	3.41539	4.09943	3.48767	3.27877	3.36983	2.89796	3.04191	3.19407	3.40569	2.93247	3.001	4.45395	4.24844	4.00008	3.64996	3.64095	3.17576	3.71117	4.03244	3.52605
ID_chr11_103232794_103233310	4.04415	3.80957	3.92312	3.48196	3.68698	3.33613	3.48588	3.75176	3.1844	3.69031	3.61104	3.16002	4.28446	4.52587	4.24659	3.91515	4.10091	3.93576	3.59359	3.9065	3.71403
ID_chr8_23124858_23125682	2.90368	3.39313	2.79836	3.47597	3.21282	3.71072	4.04938	3.82913	3.78492	3.68723	3.52878	3.59735	2.82975	3.16348	3.00357	2.74201	3.1544	3.60734	2.7758	2.69017	3.248
ID_chr12_84530236_84530784	3.38426	3.40855	3.63996	3.47384	3.61747	3.42257	3.98244	3.72746	4.29316	3.97672	4.12908	4.03748	3.08048	3.44495	3.4237	3.41689	3.53476	3.72615	3.52019	3.83507	3.28329
ID_chr2_105120741_105121360	3.79526	3.82323	4.04235	3.46884	3.38536	3.33514	3.0488	2.77875	2.7963	3.34773	3.47712	3.05705	3.70971	3.84322	4.48955	4.08458	4.43954	3.98279	3.80981	3.93669	3.57164
ID_chr7_47103752_47104400	3.39922	3.1366	3.5053	3.44307	3.0907	3.4752	2.94236	2.91792	3.26845	2.83896	2.78578	2.79957	4.79777	4.46635	4.63092	3.42859	3.59493	3.55687	3.49069	3.69415	3.33697
ID_chr17_32064561_32064911	2.32623	2.97927	2.5308	3.42407	3.0716	3.37699	3.47933	3.12474	3.33266	2.82724	2.42376	2.76376	2.56785	2.2392	2.805	2.47949	2.6433	2.92292	2.84559	2.69314	2.52342
ID_chr10_21741807_21742490	3.2051	2.72844	2.75073	3.41614	3.66256	3.5927	4.14651	3.72309	4.05839	3.12387	3.30501	3.05559	2.54856	2.55658	2.73935	2.61719	2.56867	2.78103	2.82815	2.75279	2.4596
ID_chr11_117267292_117267858	3.6801	3.338	3.6117	3.40668	2.98312	2.91775	2.69038	3.15432	2.75127	3.00803	3.0089	2.89453	4.16415	4.00487	4.31427	3.44251	3.83414	3.72831	3.09428	3.81411	3.29999
ID_chr8_91390338_91390997	3.9019	3.38248	3.85586	3.38975	3.035	3.4105	3.06007	3.01052	3.22317	2.99541	3.27364	3.08493	4.14283	3.8045	3.82467	3.48489	3.7464	3.70676	3.43523	3.64152	3.55497
ID_chr4_135808365_135809170	2.98895	3.44159	3.35921	3.38682	3.69946	3.68845	3.53585	3.66698	3.89567	3.86563	3.99949	4.71294	3.12235	3.37105	3.19368	3.28813	3.67135	4.07878	3.43213	3.58529	3.55475
ID_chr7_83639078_83639705	3.7876	3.69451	3.76762	3.35529	3.39984	3.10618	3.42898	3.34467	2.98913	3.25332	3.09179	3.24239	4.35429	4.46137	3.63044	3.25942	3.47675	3.67092	3.70636	3.61421	3.58703
ID_chr17_47515535_47515776	3.87756	3.74797	3.8614	3.3466	3.33421	3.42888	3.41464	3.28773	3.11892	3.45627	3.42694	3.52884	4.40463	3.95829	3.61144	3.81735	3.97089	3.42177	3.70777	4.16669	3.70793
ID_chr5_75640353_75641095	3.19275	3.54838	3.71909	3.32266	3.02177	3.40512	3.22318	3.00122	3.02108	3.17466	3.52549	3.3989	4.59688	4.61191	3.90262	3.87605	3.67792	4.03053	3.9502	4.23517	3.34398
ID_chr7_84620090_84620670	1.94279	2.2375	1.97159	3.29162	3.33341	2.92046	3.18014	3.49613	3.61628	1.99218	2.13428	2.58131	2.03932	1.72814	1.96812	1.93184	2.21543	2.06304	1.83587	1.97447	1.99106
ID_chr12_54452789_54453978	3.90434	3.51722	3.9666	3.28906	2.81879	3.36955	3.18708	2.96931	2.75085	3.30711	3.30706	3.24623	3.93506	4.04738	4.53647	3.69214	4.03968	3.74646	3.40358	3.98936	3.38515
ID_chr10_99227874_99228887	3.08454	3.5519	3.87903	3.27482	3.05271	3.64512	3.34025	3.09415	2.82197	3.13158	2.9999	3.22882	4.05094	3.82709	4.37982	3.63736	3.77111	3.92199	3.24402	4.01997	3.86642
ID_chr9_96299339_96299951	3.17758	3.20062	3.28709	3.24127	3.16404	3.39806	4.26259	3.94324	3.97086	3.98612	3.8895	4.33105	2.67511	2.99141	2.86723	3.42707	3.15167	3.39466	3.55012	3.06558	3.54451
ID_chr7_34918388_34918997	3.0374	3.2942	3.20887	3.22917	3.01062	2.96459	2.74729	2.68502	2.93291	2.83446	2.87961	2.96549	4.60833	4.05478	3.49554	3.35187	3.72179	3.74613	3.20093	3.66571	3.70264
ID_chr15_75731610_75732027	3.97436	4.0713	4.00087	3.22913	3.7007	3.37858	3.36476	3.31469	3.00385	3.38548	3.629	3.65949	4.10196	3.94822	3.72578	3.87976	3.93662	3.76179	3.84406	4.10816	3.73611
ID_chr9_20973700_20974047	2.72465	2.89846	3.41689	3.20385	3.12749	3.19644	3.18314	3.26804	3.29065	2.87918	3.22361	2.75439	4.16056	4.06198	4.20789	3.61489	3.76588	3.8508	3.57227	3.59495	3.05419
ID_chr1_137171061_137171834	3.9022	3.61559	3.76213	3.18028	3.03595	3.00794	2.69716	2.55896	2.38797	3.09181	2.83376	2.77609	3.50319	3.17712	3.3527	3.67966	3.28659	3.25299	3.15146	3.55775	3.64912
ID_chr4_62582853_62583725	3.51023	3.49129	3.01812	3.1573	3.08169	3.14703	3.13389	3.04651	2.52681	2.83475	2.60796	2.69418	4.22345	4.07931	3.79847	3.39811	3.05701	3.92083	3.46778	3.90982	3.17278
ID_chr10_17492839_17493506	3.06792	2.97364	3.11703	3.14015	3.29666	2.98207	3.05426	3.84641	3.84322	3.14322	3.43131	3.33303	2.35066	2.44826	2.82581	2.66924	2.88336	2.74985	2.88464	2.81571	2.64995
ID_chr9_107372476_107372840	3.43441	3.73343	2.9986	3.13216	3.50982	3.5132	3.49812	3.22578	3.05389	3.39822	2.92371	3.11737	4.5332	4.34423	3.92545	3.64259	3.70638	3.43695	3.39546	4.02481	3.51775
ID_chr4_62681330_62682103	3.18394	3.20727	3.342	3.12511	2.7414	3.02414	3.01185	2.88442	3.09978	2.80754	2.84901	2.92579	4.1362	4.04309	3.18087	3.49951	3.6817	3.6419	3.23843	3.18617	3.21658
ID_chr11_80489638_80490349	2.69317	3.37996	3.29698	3.1026	3.48111	3.16045	3.53727	3.19839	3.27891	3.27365	3.39693	3.3134	4.27537	4.2119	3.89259	3.33561	3.67408	3.56241	3.55825	3.69647	3.55286
ID_chr2_128342004_128342767	3.07655	3.32305	3.24299	3.05936	3.12683	2.93838	2.92662	2.89084	2.68015	2.81309	2.6799	3.05885	3.82869	3.90712	4.02607	3.32825	3.47725	4.0032	3.3163	3.69249	2.97991
ID_chr9_72813022_72813579	3.26232	3.58108	3.56633	3.05897	3.13325	3.02164	3.18873	3.37816	3.05296	3.18277	2.76165	3.14928	3.95691	3.51868	4.3578	3.53338	3.30607	3.51756	3.51624	3.47621	3.69093
ID_chr4_125145168_125145612	2.90507	2.92667	3.60509	3.01559	2.60326	3.16452	2.8772	2.84407	2.53823	2.6183	2.42085	2.60452	4.55572	4.25252	4.57837	3.29481	3.27283	3.4041	3.53086	3.15459	2.73825
ID_chr7_115941130_115941381	2.29687	2.4667	2.55965	3.01382	3.23045	2.96372	2.87537	2.66241	2.80317	2.64816	2.63629	3.05068	2.3729	2.13312	2.161	2.36222	2.50207	2.36542	2.45499	2.56074	2.90847
ID_chr7_35126821_35127439	3.33832	2.97873	3.6903	2.9979	2.77194	3.22137	2.54151	2.68589	2.77982	2.82333	2.8762	2.86166	3.89452	3.19601	3.63426	3.2703	3.6929	3.21287	3.03751	3.40324	3.16252
ID_chr11_69740117_69740610	2.28713	2.46278	2.48279	2.95758	2.88259	2.88958	3.22623	3.09323	3.16127	2.86233	2.70895	2.73414	2.3663	2.20517	2.1492	2.50337	2.25387	2.35967	2.45095	2.46506	2.48717
ID_chr12_34847386_34848151	2.57834	2.66643	2.88024	2.9548	2.74621	2.69439	2.37354	2.51351	2.08968	2.29499	2.35594	2.55568	3.38457	3.05524	2.93658	2.49137	2.97032	2.75392	2.77591	3.01548	2.97442
ID_chr4_155217284_155217710	2.81726	3.04617	3.36464	2.90764	3.26633	3.13429	2.61668	3.03369	3.05471	3.27681	2.77812	2.94882	4.42877	3.98896	4.65232	3.56664	3.41273	3.45602	3.18792	3.13054	2.80014
ID_chr4_62629487_62630327	3.02168	3.49953	3.42853	2.88868	2.98673	3.44701	2.91076	2.88995	2.57385	2.8114	2.84618	2.76275	4.65325	4.42194	4.17652	3.49876	3.84961	4.33162	3.58686	3.54924	3.38269
ID_chr9_64105307_64105948	3.16402	2.73596	2.75864	2.88692	2.88601	2.46132	2.45229	2.72493	2.52307	2.44174	2.22677	2.5045	3.45268	3.17167	3.28217	3.04703	2.95631	3.25545	2.84918	2.60548	3.11861
ID_chr2_27404799_27405748	3.20395	3.58286	3.06538	2.8859	3.26274	2.91821	3.18627	2.88835	2.83134	2.9457	2.84417	3.02503	4.51667	4.12624	3.27391	3.84396	3.47657	4.12932	3.74135	4.00322	3.44435
ID_chr9_77923769_77924496	2.79656	3.02165	3.16954	2.88283	3.04307	3.18866	3.25427	3.18692	2.74727	2.65874	2.92133	2.91624	4.02315	3.68181	3.68212	3.65063	3.20608	3.69879	3.42637	3.6207	2.96342
ID_chr1_74715508_74716103	2.77811	3.05385	2.95623	2.86981	3.08398	2.61088	2.60123	2.71474	2.94001	2.77788	2.74616	2.80258	3.68757	3.76691	3.25737	3.2717	3.43388	3.46832	3.26984	3.41385	2.77223
ID_chr11_95315333_95315494	3.35841	3.24408	2.9958	2.8454	2.92681	2.58496	2.46121	2.45128	2.63318	2.81819	3.08743	2.8988	3.26445	3.32186	3.47889	2.93205	3.16594	3.13347	3.36655	3.26511	3.16034
ID_chr11_103984030_103984586	2.42783	2.68267	2.70526	2.83256	2.60223	2.35709	2.34855	2.34692	2.45126	2.526	2.3408	2.37729	4.1051	3.77491	3.74635	3.26527	2.88383	2.95128	3.02454	3.42688	3.07447
ID_chr3_88459873_88460355	2.57479	3.0565	2.96428	2.81141	2.82199	2.65581	2.84222	2.92751	2.59925	2.65795	2.68793	2.73367	3.96213	3.29254	3.44578	3.393	2.73569	3.18288	3.07807	3.09735	2.71117
ID_chr6_116227775_116228376	2.52678	2.78407	3.01392	2.76125	2.86317	2.78472	3.05547	3.15429	3.05975	3.47292	3.45685	3.42278	3.59745	3.53048	3.4914	2.95062	3.16817	3.45879	3.32893	3.47244	3.0957
ID_chr18_77639789_77640186	2.29469	2.61284	2.56427	2.75873	2.5415	2.81433	3.10285	3.22862	3.12153	2.81794	2.78573	2.49091	2.29255	2.12076	2.42951	2.36254	2.38874	2.78975	2.63736	2.4726	2.58938
ID_chr11_86167032_86167597	2.7886	3.00675	2.90171	2.61568	2.73394	2.73106	3.38861	2.93187	3.07549	3.93803	3.96113	3.71619	2.5572	2.86378	2.61963	3.18845	2.69929	2.99317	3.62545	3.23973	3.20091
ID_chr5_65040388_65040816	3.37295	2.87999	3.13965	2.54979	2.66965	2.66016	2.54254	2.86838	2.68062	2.5933	2.92287	2.60358	3.59958	3.46294	2.90052	3.01786	3.29883	3.33882	3.14897	3.09947	2.97756
ID_chr7_143373132_143373872	2.31498	2.49405	2.51472	2.5449	2.72063	2.4609	2.91766	2.23349	2.15233	2.26115	2.74565	2.65337	3.64257	3.30602	3.48646	2.46156	2.41676	3.08277	2.4847	2.39851	2.87514
ID_chr4_62663436_62664217	3.05598	2.77046	2.72199	2.49437	2.99291	2.60701	2.48565	2.36292	2.2831	2.21174	2.45851	2.54561	3.8403	4.01781	3.88629	2.7333	2.9033	3.58087	2.62484	3.13398	3.1657
ID_chr5_77292691_77293136	2.26471	2.44463	2.46506	2.4933	2.43415	2.5127	2.03352	2.27162	1.888	2.21166	2.26991	2.94413	3.7131	3.44797	2.75317	2.6861	2.79905	2.76981	2.85352	2.87214	2.36556
ID_chr15_77643139_77643753	2.67529	3.0668	2.56359	2.49258	2.52951	2.80235	3.39642	3.25252	2.77189	3.74685	3.07285	3.58686	2.60005	2.81645	3.04954	2.5876	2.79026	2.65596	2.79838	2.63547	2.65913
ID_chr9_21332698_21333074	2.89548	2.78191	2.87433	2.48807	3.06848	2.98796	2.9755	2.62259	2.92453	2.94208	2.72956	2.64931	3.77205	3.46139	3.49004	3.20943	3.34127	3.64736	3.11975	3.06613	2.65645
ID_chr16_30686434_30686899	2.20928	2.05139	2.32368	2.43286	2.10753	2.01466	2.00764	2.29495	1.96069	2.23156	2.12486	2.15212	3.28672	3.03034	2.79337	2.48275	2.06913	2.79263	2.28281	2.56617	2.5918
ID_chr12_110777861_110778255	2.64463	3.022	3.04826	2.41091	2.56222	2.6321	2.62184	2.56978	2.6711	2.3262	2.37771	2.69903	4.54301	4.11947	4.18665	3.64867	3.55431	3.77659	3.24159	3.5177	3.2955
ID_chr9_64820368_64820680	2.7268	2.74702	2.89591	2.4018	3.23714	3.04945	2.79038	3.12378	3.32601	2.71963	2.85676	3.41334	2.07959	2.18435	2.2373	2.50371	2.69431	3.04203	2.43116	2.63769	2.46605
ID_chr15_50870150_50870497	2.94336	2.45393	2.87906	2.39882	2.7468	2.49855	2.27148	2.28654	2.38147	2.07485	2.45655	2.28192	3.48152	3.40243	3.0277	3.02468	3.05232	2.93725	2.52074	3.19639	2.73678
ID_chr11_68006319_68006787	1.11127	1.34225	1.24374	2.32926	1.7677	2.18901	2.09515	1.69891	2.12353	1.29976	1.27845	1.2906	1.43013	1.22863	1.41813	1.21928	1.39372	1.3811	1.31259	1.31992	1.45791
ID_chr5_102777590_102778487	2.06503	2.4374	2.81183	2.29241	2.02672	2.50718	2.01836	2.25994	1.97935	2.11068	2.04274	2.16018	4.13744	3.66115	3.22243	2.86266	2.21972	3.11631	2.52117	3.26782	2.65471
ID_chr15_59783961_59784822	2.31105	2.2474	2.4256	2.27813	2.02624	2.0372	2.02989	1.96578	1.97803	2.00857	2.0426	2.02591	3.21987	3.02388	3.51253	2.69338	2.22555	3.13625	2.49446	2.41901	2.53513
ID_chr11_4333020_4333381	2.31354	2.41011	2.34931	2.26585	2.30967	2.67007	2.56461	2.32081	2.06437	2.00095	2.23342	2.12793	3.50319	3.41566	3.46741	2.45232	2.5547	2.6341	2.57922	2.30731	2.78862
ID_chr11_4527110_4527537	2.29233	1.88366	2.17246	2.18033	2.30233	2.17507	1.92918	2.06183	2.24066	1.73401	1.83818	2.21243	3.31823	2.82681	2.61924	2.70195	1.98846	2.33373	2.10728	2.31815	2.34047
ID_chr11_118502283_118502717	1.87347	2.21732	1.58481	2.17714	1.93899	2.07448	2.17402	1.7831	1.794	2.14373	2.22862	2.10446	2.72488	2.6863	2.88002	2.32288	2.01583	2.11899	1.89982	1.91022	2.03896
ID_chr17_46013510_46013998	2.1966	2.04888	2.06534	2.15805	2.19661	2.15184	2.02888	2.04087	2.05436	2.06671	2.02971	2.04323	2.83995	2.75485	3.03268	2.023	2.09595	2.51392	2.45456	1.9872	2.11544
ID_chr5_43818715_43819273	2.02732	2.13049	2.14746	2.14452	2.36308	2.12581	2.23157	2.28471	2.0461	2.22148	2.11409	1.987	3.24216	3.14295	2.96102	2.33718	2.42321	2.39926	2.27194	2.38098	2.49504
ID_chr5_103732692_103732959	2.21009	2.46656	2.15188	2.13952	2.6174	2.10893	2.10141	2.0315	1.94065	2.15793	2.21291	2.65663	3.63552	3.12583	3.15719	2.57047	2.41922	2.61308	2.64356	2.74104	2.98961
ID_chr9_45546983_45547706	2.26858	2.2859	1.96895	2.05482	1.90615	2.25704	1.90074	1.94621	1.75712	2.13856	2.12224	2.03894	3.1666	2.80642	3.11068	2.18024	1.95964	2.07309	2.18301	2.19617	2.49504
ID_chr11_109793590_109794053	1.98344	1.99751	1.92189	2.00563	2.22926	2.3073	1.9732	2.07401	2.00292	1.93621	1.76204	1.9833	2.96448	2.75639	2.90298	2.13329	2.27808	2.0206	2.22873	2.04271	1.82823
ID_chr15_50866756_50867198	2.12728	2.22934	2.4093	1.93545	1.8949	1.88146	1.87514	1.94471	2.05584	1.89508	2.02194	2.00339	3.57422	3.55853	3.1595	2.62119	2.55496	2.52831	2.47797	2.74046	2.60703
ID_chr4_62653736_62654315	1.77528	1.88325	1.98967	1.87416	2.03104	1.95461	1.82359	1.96579	1.88814	1.99325	1.61841	2.23626	2.89739	2.63093	2.40784	2.25285	2.13572	2.22844	2.10764	2.47374	2.4178
ID_chr5_139042277_139042772	1.44787	1.92013	1.352	1.85291	1.60572	1.71618	1.5827	1.55656	1.5665	1.69597	1.50558	1.5405	2.7671	2.56634	2.05529	1.89253	1.76876	2.10048	1.97615	1.6725	1.90946
ID_chr8_106556105_106556551	1.83536	1.94653	2.14434	1.8251	2.00242	2.02709	2.13648	1.73577	1.85244	1.88724	2.01965	1.87774	3.21714	3.1938	3.19435	2.01238	2.0881	2.61117	2.36967	2.47231	2.31506
ID_chr14_7977535_7978045	1.78608	1.88377	1.90009	1.79914	1.5459	1.88305	1.50057	1.87583	1.51219	1.82238	2.04563	1.59559	2.54256	2.5526	2.32035	2.00934	1.94352	1.67105	1.71277	1.72227	1.73713
ID_chr15_50997161_50997469	1.99804	1.71814	1.23042	1.40025	1.77466	1.45869	1.31633	1.21876	1.22519	1.57764	1.49524	1.56294	2.47794	2.12885	1.66727	1.69336	1.63675	1.97057	1.41655	1.95547	1.67498
ID_chr15_101309028_101309311	1.39101	1.30121	1.51023	1.12468	1.22607	1.44133	1.16438	1.48918	1.30489	1.15765	1.23625	1.2443	2.1104	1.94145	2.385	1.38205	1.48913	1.7207	1.13693	1.51749	1.53312
ID_chr10_41665544_41665853	1.11747	1.12552	1.44962	1.05431	1.15856	1.37576	1.09357	1.121	1.12862	0.978112	1.04032	1.49515	2.52352	2.17922	1.71823	1.21885	1.28061	1.65957	1.32769	1.85465	1.2202
ID_chr19_32788852_32789016	0.738355	0.85111	0.860118	1.02141	1.17771	0.966174	0.690274	0.626865	0.631026	0.610136	0.652969	0.746081	1.40664	1.41387	1.03012	1.10691	0.714297	0.993298	1.03984	0.809253	0.81796
ID_chr2_65101245_65101746	0.770661	1.00368	1.01353	0.815323	0.922716	0.995017	0.990635	0.77295	0.777888	0.863796	0.9315	1.23652	1.97234	1.76982	1.1975	1.34735	1.17139	1.28771	0.960366	0.96657	1.10527
ID_chr1_127588518_127588727	-0.158118	-0.155318	-0.152092	-0.134161	-0.143839	-0.115143	-0.116863	-0.156891	-0.154243	-0.16756	-0.140322	-0.0808248	0.665498	0.528222	0.370399	-0.160408	-0.101928	0.197052	0.142198	0.148043	0.0228619
